# Supplementary material for: Untargeted Multimodal Metabolomics Investigation of the Haemonchus contortus Exsheathment Secretome
Source: MDPI journal article supplement (doi:10.3390/cells11162525), 2022-08-15
Supplement: s1 [file s1]

| Treatment | LP200.201 | LP201.008 |
|-----------|-----------|-----------|-----------|-----------|-----------|-----------|-----------|-----------|
| PBS       | 11886.61  | 27387.22  | 36947.55  | 28810.47  | 28207.21  | 39273.28  | 37320.49  | 36018.21  |
| PBS       | 12227.42  | 24562.39  | 40255.02  | 31027.6   | 25052.86  | 36260.05  | 42603.38  | 34485.02  |
| PBS       | 13139.3   | 29345.48  | 38471.07  | 28952.92  | 29778.1   | 39536.68  | 41133.6   | 40022.15  |
| PBS       | 9719.564  | 25107.17  | 39542.17  | 28208.73  | 28145.27  | 35686.09  | 41692.62  | 37090.66  |
| PBS       | 17185.59  | 19740.96  | 38976.79  | 27495.49  | 28481.53  | 31274.47  | 34145.84  | 33906.06  |

|           |           |           |           |           |           |           |           |           |           |
|-----------|-----------|-----------|-----------|-----------|-----------|-----------|-----------|-----------|-----------|
| LP201.008 |
| 41264.03  | 30297.02  | 25243.33  | 37498.87  | 39116.76  | 35928.96  | 29039.55  | 33204.19  | 25282.92  | 30564.4   |
| 38878.08  | 27572.71  | 23653.45  | 39547.75  | 37767.56  | 34806.93  | 29791.69  | 33107.92  | 27797.13  | 33011.47  |
| 43988.25  | 26689.14  | 24060.21  | 42418.66  | 42440.42  | 40193.98  | 33374.91  | 32566.3   | 30981.5   | 29867.53  |
| 41991.23  | 27864.42  | 23616.49  | 44547.52  | 38855.45  | 37397.4   | 33019.07  | 30431.64  | 24679.86  | 34503.99  |
| 33380.91  | 22453.73  | 25684.59  | 35750.01  | 35124.37  | 24644.72  | 27158.9   | 32874.9   | 19388.19  | 23632.29  |

|           |           |           |           |           |           |           |           |           |           |
|-----------|-----------|-----------|-----------|-----------|-----------|-----------|-----------|-----------|-----------|
| LP201.008 |
| 33381.16  | 33231.96  | 36623.99  | 33247.62  | 41534.06  | 37225.61  | 29154.88  | 19513.46  | 25014.11  | 33008.77  |
| 34639.62  | 30038.44  | 33556.44  | 35862.92  | 42554.21  | 39428.5   | 22958.07  | 18980.95  | 30004.38  | 34899.5   |
| 36954.7   | 30485.83  | 40588.65  | 37182.01  | 51979.89  | 41288.99  | 28828.66  | 20749.93  | 32801.35  | 38623.9   |
| 39668.54  | 32357.27  | 37740.39  | 37466.54  | 43208.98  | 38412.7   | 25686.67  | 18488.86  | 27915.16  | 35047.5   |
| 35439.75  | 29153.22  | 33166.53  | 31025.25  | 42189.52  | 38770.98  | 26133.39  | 16692.67  | 26151.66  | 33576.12  |

|           |           |           |           |           |           |           |           |           |           |
|-----------|-----------|-----------|-----------|-----------|-----------|-----------|-----------|-----------|-----------|
| LP201.008 |
| 48915.78  | 43671.2   | 30798.67  | 39659.83  | 25426.27  | 27716.14  | 27262.64  | 21289.91  | 27304.39  | 29805.8   |
| 47294.91  | 44061.09  | 28044.27  | 37785.18  | 26124.97  | 27644.52  | 28062.86  | 24515.12  | 27934.89  | 29499.26  |
| 50500.73  | 47567.8   | 28850.18  | 39095.65  | 27636.34  | 29804.65  | 31051.7   | 22712.59  | 28700.98  | 33195.56  |
| 49113.24  | 47482.06  | 27298.53  | 35219.78  | 24938.8   | 26407.02  | 25310.76  | 19427.32  | 30554.43  | 27907.38  |
| 46846.59  | 46010.44  | 28487.96  | 36276.21  | 26068.62  | 25798.29  | 26375.18  | 21359.61  | 29019.5   | 26517.79  |

|           |           |           |           |           |           |           |           |           |           |
|-----------|-----------|-----------|-----------|-----------|-----------|-----------|-----------|-----------|-----------|
| LP201.008 | LP202.016 | LP202.016 | LP202.015 | LP202.015 | LP202.016 | LP202.016 | LP203.069 | LP203.106 | LP204.123 |
| 20170.9   | 38684.89  | 52584.46  | 57256.35  | 29247.11  | 36648.71  | 48336.76  | 10423.42  | 12951.43  | 21000.93  |
| 20454.11  | 39319.53  | 49504.19  | 59123.76  | 22238.44  | 33354.36  | 43718.27  | 7969.942  | 11839.17  | 22751.68  |
| 21450.89  | 58759.8   | 71804.19  | 77675.04  | 27929.94  | 44458.64  | 61103.05  | 9868.094  | 11951.29  | 21756.98  |
| 20643.43  | 59582.87  | 60745.55  | 76737.69  | 29800.34  | 48632.35  | 63923.59  | 8394.191  | 10512.6   | 23772.13  |
| 19138.58  | 40013.21  | 49027.56  | 57994.89  | 23328.38  | 35087.71  | 43650.41  | 12084.19  | 11492.71  | 22992.66  |

|           |           |           |           |           |           |           |           |           |           |
|-----------|-----------|-----------|-----------|-----------|-----------|-----------|-----------|-----------|-----------|
| LP204.123 |
| 22628.12  | 21559.92  | 22417.34  | 21614.54  | 34678.01  | 32038.44  | 32464.45  | 24106.95  | 23317.15  | 20101.29  |
| 23513.37  | 25885.22  | 27775.83  | 18804.81  | 33254.18  | 30123.32  | 31186.43  | 24700.94  | 25768.1   | 21851.91  |
| 26876.43  | 23950.57  | 24175.3   | 18136.95  | 30541.47  | 28255.44  | 31455.9   | 24299.35  | 25165.63  | 20204.87  |
| 26539.79  | 26413.72  | 27123.82  | 25954.62  | 32229.35  | 30672.19  | 32731.91  | 23197.89  | 23220.9   | 20913.95  |
| 26434.72  | 22089.83  | 24333.51  | 20363.57  | 32293.92  | 33383.78  | 30525.71  | 26868.81  | 24217.97  | 21056.51  |

|           |           |           |           |           |           |           |           |           |           |
|-----------|-----------|-----------|-----------|-----------|-----------|-----------|-----------|-----------|-----------|
| LP204.123 |
| 33515.68  | 30392.22  | 25533.12  | 21112.8   | 26518.68  | 27054.04  | 22873.07  | 20882.64  | 21370.88  | 22985.58  |
| 34359.74  | 31101.24  | 22139.9   | 21202.91  | 26899.98  | 26336.21  | 22053.56  | 24533.06  | 20244.66  | 22763.22  |
| 30918.51  | 28549.49  | 24712.68  | 19722.09  | 28483.6   | 29280.01  | 21101.52  | 23335.81  | 19592.01  | 20280.07  |
| 33566.42  | 32468.71  | 23824.07  | 21685.7   | 27490.56  | 27650.26  | 23912.82  | 22618.66  | 20665.27  | 23604.55  |
| 30534.96  | 28771.75  | 23581.51  | 20615.31  | 25937.84  | 28626.13  | 21454.65  | 24960.62  | 18303.06  | 24025.93  |

|           |           |           |           |           |           |           |           |           |           |
|-----------|-----------|-----------|-----------|-----------|-----------|-----------|-----------|-----------|-----------|
| LP204.123 | LP204.122 | LP204.123 | LP205.195 | LP205.393 | LP206.089 | LP206.089 | LP206.089 | LP206.089 | LP206.089 |
| 32593.14  | 28302.36  | 24667.95  | 18997.32  | 28526.89  | 108953.4  | 472857    | 467656.4  | 547649.5  | 272299.3  |
| 32515.09  | 28176.5   | 30851.06  | 19327.12  | 31822.92  | 81627.68  | 516391.4  | 501327.7  | 399075.2  | 421436.4  |
| 33193.32  | 27507     | 29633.04  | 20745.13  | 38737.37  | 79786.56  | 390798.4  | 737875    | 464310.6  | 492991.4  |
| 34338.43  | 28919.65  | 27101.88  | 17860.07  | 22907.41  | 70959.56  | 562661.4  | 636629.4  | 233596.9  | 212770.9  |
| 34874.24  | 23973.37  | 31514.51  | 22860.77  | 19624.25  | 58101.12  | 369682.2  | 516963.3  | 369943.3  | 494864.7  |



LP206.089  
495512.1 599963.8 334755.9 408316.1 445737.8 571212.9 524196.8 568217.3 404129.5 569878.3  
572630.4 777179.1 338238.6 335215.5 460140.3 454346.8 550976.6 388822.8 540107.1 415558.9  
570283.5 594132.2 265091.9 345802.7 364257.6 495071.9 571751.8 337338.9 509561.6 380453.5  
278330 622806.6 321482.6 294089 415309.6 667669.4 466492.7 284511.3 511268.4 436258.1  
539857.2 609770.2 200176.3 413941.8 631708.1 635985.2 420122.7 445823.3 485398.8 479442.6

|           |           |           |           |           |           |           |           |           |           |
|-----------|-----------|-----------|-----------|-----------|-----------|-----------|-----------|-----------|-----------|
| LP206.089 |
| 377457.9  | 459033.8  | 549034.7  | 842988.1  | 402125.3  | 459202.9  | 463464.6  | 417106.7  | 297748.2  | 432614.8  |
| 429126.9  | 396247.7  | 554460.4  | 661074.3  | 508550.2  | 368652.6  | 542472.3  | 337591.8  | 243727.8  | 458101.6  |
| 476604.2  | 596886.7  | 779225.2  | 660286.5  | 319584.7  | 435598    | 411306    | 316134.9  | 254771.3  | 450176.8  |
| 368314.3  | 441966    | 565938    | 898931.7  | 341529.3  | 440230    | 458131.8  | 243801.6  | 199404.9  | 404328.8  |
| 342888.1  | 476254.3  | 837522.4  | 645279    | 292243.6  | 468480    | 740687.1  | 301333.7  | 312801.9  | 387443.4  |

|            |            |            |            |            |            |            |            |            |            |
|------------|------------|------------|------------|------------|------------|------------|------------|------------|------------|
| LP206.089! |
| 463315.1   | 318453.4   | 186018     | 528184.5   | 394476.1   | 321513.4   | 412653.3   | 401973.9   | 208882.8   | 327525.3   |
| 482941.1   | 323414.7   | 172688.6   | 437294.9   | 349682.1   | 359697.8   | 387600.1   | 460545.7   | 357999.1   | 398330.1   |
| 495628.1   | 253511.4   | 195462.8   | 506397.6   | 375166.5   | 406998.3   | 337267     | 415457.8   | 347364.9   | 300692     |
| 382124     | 295812.4   | 143403.7   | 445073.5   | 317799.7   | 366951.3   | 401613.8   | 582305.8   | 222802.6   | 341876.9   |
| 459559.9   | 313881.7   | 192199.2   | 483501.8   | 403698.3   | 369321.3   | 386425.6   | 403563.3   | 230564.2   | 319555.5   |

|           |           |           |           |           |           |           |           |           |           |
|-----------|-----------|-----------|-----------|-----------|-----------|-----------|-----------|-----------|-----------|
| LP206.089 |
| 180691.6  | 350475.5  | 348279.9  | 269048.9  | 401553.9  | 262795.7  | 315173.2  | 258340.3  | 207858.2  | 195990    |
| 226390.7  | 349668.9  | 372875    | 265522.4  | 444961.4  | 322739.8  | 316639.2  | 254267.4  | 299522.7  | 240056.5  |
| 187535    | 354778.8  | 286345    | 262934.7  | 402170.7  | 326731.6  | 339107.6  | 254022.3  | 207264.6  | 197467    |
| 180315.7  | 397398.6  | 279534.1  | 317291.9  | 392801.9  | 326231.5  | 298431.8  | 273869.2  | 277029.4  | 174785    |
| 195964.1  | 434279.9  | 272570.8  | 262987.3  | 388810    | 313115.8  | 292849.6  | 236057.2  | 238564    | 171606.2  |

|            |            |            |            |            |            |            |            |            |            |
|------------|------------|------------|------------|------------|------------|------------|------------|------------|------------|
| LP206.089! |
| 281889.7   | 279186.5   | 463885.1   | 185494.7   | 163833.6   | 142097.6   | 269551     | 405068.8   | 163088.4   | 216895.1   |
| 320481.2   | 383984.8   | 259310.7   | 216056.9   | 257096.3   | 150380.7   | 274723.7   | 217561.6   | 164080     | 172892.8   |
| 284177     | 285629.3   | 254958.9   | 195703.4   | 239476.2   | 136759.1   | 206606     | 268918.3   | 156338     | 179866.8   |
| 274892.9   | 285779.3   | 240564.8   | 199980.4   | 255254.4   | 151876.7   | 330183.3   | 290318.8   | 137182.2   | 142195.1   |
| 256364.3   | 295589     | 316091.5   | 201874.6   | 217868.5   | 142430.2   | 169906.5   | 278859.2   | 152981.6   | 186060.1   |

|           |           |           |           |           |           |           |           |           |           |           |
|-----------|-----------|-----------|-----------|-----------|-----------|-----------|-----------|-----------|-----------|-----------|
| LP206.089 | LP207.091 | LP207.092 | LP207.092 |
| 202972    | 174312.4  | 189777    | 227706.5  | 105774.2  | 158576.9  | 95987.38  | 54631.13  | 37082.92  | 38789.43  |           |
| 172191    | 154466.1  | 147651.3  | 218501.3  | 98525.07  | 172483.2  | 73031.93  | 36922.71  | 32007.28  | 36244.01  |           |
| 194033.9  | 157582.1  | 194569.8  | 200956.1  | 92283.25  | 171230.1  | 79596.37  | 52518.04  | 34812.73  | 41532.17  |           |
| 263720.4  | 159288.6  | 142633.3  | 216168.8  | 95208.66  | 176038.5  | 75150.59  | 51845.95  | 34104.3   | 42442.43  |           |
| 203569.1  | 149269.2  | 134890.2  | 207022.1  | 75223.93  | 168476.6  | 67448.56  | 56112.29  | 36466.24  | 42186.56  |           |

|           |           |           |           |           |           |           |           |           |           |
|-----------|-----------|-----------|-----------|-----------|-----------|-----------|-----------|-----------|-----------|
| LP207.092 | LP207.092 | LP207.137 | LP207.138 | LP207.137 | LP207.138 | LP207.137 | LP207.159 | LP207.174 | LP207.174 |
| 43702     | 25052.49  | 40623.79  | 49708.15  | 40383.05  | 36114.76  | 32449.34  | 13791.82  | 25824.24  | 22353.3   |
| 35339.85  | 22826.56  | 26624.23  | 36032.98  | 39417.68  | 30129.81  | 33521.97  | 13512.81  | 25915.35  | 28067.9   |
| 43109.51  | 23417.42  | 29377.18  | 38255.46  | 36835.19  | 32504.37  | 33578.83  | 14865.21  | 26025.3   | 24641.56  |
| 44154.66  | 24807.83  | 29038.87  | 42124.67  | 28842.96  | 34540.61  | 29784.32  | 11097.28  | 26146.62  | 24441.42  |
| 40416.79  | 23489.61  | 32310.69  | 45411.95  | 34385.85  | 33402.79  | 35720.39  | 13153.16  | 29727.53  | 25406.43  |

|           |           |           |           |           |           |           |           |           |           |
|-----------|-----------|-----------|-----------|-----------|-----------|-----------|-----------|-----------|-----------|
| LP207.174 | LP207.174 | LP209.080 | LP209.081 | LP209.081 | LP209.081 | LP209.080 | LP209.080 | LP209.080 | LP209.080 |
| 23232     | 16222.5   | 1391835   | 562059.6  | 957275.3  | 4952660   | 3386761   | 2968489   | 1576469   | 4901024   |
| 22286.84  | 15858.42  | 1367111   | 484306.6  | 1513692   | 3784450   | 2053156   | 2027902   | 1988857   | 4898381   |
| 22457.97  | 19623.41  | 1355307   | 521633.5  | 1815963   | 4744669   | 2346030   | 3379700   | 1629895   | 4757065   |
| 21746.17  | 16916.87  | 1713442   | 590799.9  | 1312714   | 5678167   | 1992707   | 2433100   | 1590789   | 6397420   |
| 24571.11  | 17777.9   | 2056573   | 555216.5  | 1863595   | 3854543   | 2531129   | 1906729   | 1967641   | 3226920   |



|           |           |           |           |           |           |           |           |           |           |
|-----------|-----------|-----------|-----------|-----------|-----------|-----------|-----------|-----------|-----------|
| LP209.081 | LP209.081 | LP209.080 | LP209.081 | LP209.081 | LP209.081 | LP209.081 | LP209.080 | LP209.080 | LP209.081 |
| 2040499   | 3341233   | 2249901   | 5723159   | 842968    | 3899146   | 2118311   | 1790445   | 3138899   | 3280882   |
| 1944331   | 1984134   | 2985121   | 4502510   | 764645.1  | 3507968   | 3004631   | 1820767   | 2548092   | 3564188   |
| 2238934   | 4341235   | 3021314   | 6326231   | 637869.7  | 3097187   | 2344721   | 2759694   | 1812809   | 2924755   |
| 1929712   | 1895081   | 1652575   | 5083205   | 679539.8  | 3838670   | 2297348   | 2521430   | 3431231   | 2450423   |
| 1895890   | 2573064   | 2299656   | 4270926   | 1260709   | 2539445   | 2241817   | 1540584   | 2363984   | 3524294   |

|           |           |           |           |           |           |           |           |           |           |
|-----------|-----------|-----------|-----------|-----------|-----------|-----------|-----------|-----------|-----------|
| LP209.081 | LP209.081 | LP209.081 | LP209.080 | LP209.081 | LP209.081 | LP209.080 | LP209.081 | LP209.081 | LP209.081 |
| 2431413   | 3740028   | 1957619   | 2180641   | 347598    | 5003055   | 1931895   | 3116772   | 3302689   | 2853394   |
| 2828628   | 3793411   | 1703709   | 1640282   | 510001.5  | 5536965   | 2407562   | 4241222   | 3349229   | 2149313   |
| 2541983   | 3439815   | 1735692   | 1482901   | 578292.8  | 4456411   | 3061851   | 5100072   | 3118179   | 2268989   |
| 2921655   | 4867376   | 1843552   | 1707457   | 339336.5  | 4815511   | 2026734   | 2964692   | 4704632   | 1765081   |
| 2564265   | 3924542   | 1785313   | 2280307   | 562456    | 4583564   | 3012039   | 3607172   | 2981737   | 2646275   |

|           |           |           |           |           |           |           |           |           |           |
|-----------|-----------|-----------|-----------|-----------|-----------|-----------|-----------|-----------|-----------|
| LP209.081 | LP209.081 | LP209.080 | LP209.081 | LP209.080 | LP209.081 | LP209.081 | LP209.081 | LP209.081 | LP209.081 |
| 3406388   | 2723740   | 2204928   | 1167236   | 3401365   | 1596941   | 4147365   | 1870763   | 5255031   | 4915832   |
| 3749974   | 3409332   | 3071156   | 1028007   | 3134781   | 2291977   | 2777944   | 1825539   | 5559619   | 3337330   |
| 7016685   | 3134106   | 1750505   | 1110576   | 2649605   | 1800785   | 2557847   | 2270008   | 6320005   | 3906839   |
| 3635803   | 2466926   | 2335709   | 1212655   | 2331906   | 1302430   | 4126569   | 1877747   | 3502715   | 3948019   |
| 2882706   | 2197024   | 2199184   | 2086815   | 2821942   | 1478639   | 2123874   | 1912172   | 4756458   | 2595391   |

|           |           |           |           |           |           |           |           |           |           |
|-----------|-----------|-----------|-----------|-----------|-----------|-----------|-----------|-----------|-----------|
| LP209.081 | LP209.081 | LP209.080 | LP209.081 |
| 2988167   | 2025983   | 2607048   | 3800880   | 3239894   | 1438499   | 1465788   | 2171436   | 2902957   | 2760468   |
| 3281337   | 1330643   | 2538848   | 4700331   | 3186770   | 1832262   | 1483000   | 1342017   | 3082959   | 3700030   |
| 4408271   | 1823999   | 5465116   | 4554408   | 3534219   | 1300414   | 1550324   | 2262755   | 3733664   | 2624333   |
| 3370442   | 2019534   | 3053769   | 4218167   | 3366361   | 1370216   | 1695478   | 1404605   | 3845186   | 3727133   |
| 3138983   | 2671435   | 2639023   | 3772319   | 3218082   | 1654829   | 2161917   | 1782960   | 2555330   | 3133073   |

|           |           |           |           |           |           |           |           |           |           |
|-----------|-----------|-----------|-----------|-----------|-----------|-----------|-----------|-----------|-----------|
| LP209.081 | LP209.080 | LP209.081 |
| 4733313   | 360496.4  | 2007687   | 2411614   | 2394728   | 1067771   | 2340735   | 3413382   | 2570573   | 2299233   |
| 4840474   | 474585.2  | 2125949   | 2443066   | 3215304   | 1229580   | 3036569   | 3307011   | 1481001   | 2606273   |
| 7370062   | 435267.4  | 1898369   | 3421855   | 2874282   | 1093699   | 3318221   | 3723646   | 1540218   | 2137509   |
| 4325652   | 419245.1  | 3262150   | 3030358   | 2874072   | 962214.3  | 2685130   | 3862162   | 1386909   | 3203304   |
| 4102241   | 612096.8  | 2489294   | 1993843   | 2524616   | 1138157   | 2543439   | 3244320   | 1565966   | 2443384   |

|           |           |           |           |           |           |           |           |           |           |
|-----------|-----------|-----------|-----------|-----------|-----------|-----------|-----------|-----------|-----------|
| LP209.081 | LP209.081 | LP209.080 | LP209.081 | LP209.081 | LP209.080 | LP209.081 | LP209.081 | LP209.081 | LP209.081 |
| 1527624   | 1654229   | 1501773   | 1803199   | 3842423   | 1977379   | 602125.5  | 1488497   | 1867331   | 2734470   |
| 1731797   | 1716433   | 1707434   | 1228454   | 3649193   | 2619258   | 513575.9  | 1128551   | 1592457   | 3375390   |
| 2001881   | 1567330   | 2038964   | 2556037   | 3112071   | 4285310   | 447845.4  | 1346863   | 1813130   | 2797164   |
| 1153263   | 1570501   | 1601774   | 1940009   | 2916026   | 1706061   | 544147.9  | 2412094   | 1421394   | 2340687   |
| 2104472   | 1732438   | 1915505   | 1315072   | 5419575   | 2547301   | 537747.8  | 1668550   | 2026283   | 3093195   |

|           |           |           |           |           |           |           |           |           |           |
|-----------|-----------|-----------|-----------|-----------|-----------|-----------|-----------|-----------|-----------|
| LP209.080 | LP209.081 | LP209.081 | LP209.081 | LP209.081 | LP209.081 | LP209.081 | LP209.080 | LP209.081 | LP209.081 |
| 1513154   | 362593.9  | 1469116   | 1881427   | 373720.9  | 2326317   | 369735.2  | 1426980   | 2142522   | 263315.5  |
| 1726206   | 443913.3  | 1482639   | 2775863   | 447329.6  | 2597864   | 521505    | 1544982   | 2667695   | 352656.1  |
| 1716726   | 335544.5  | 2126140   | 2497381   | 395389    | 1724381   | 394544.3  | 1566397   | 3105472   | 312606.7  |
| 1227811   | 385942.8  | 1556324   | 2065020   | 425216.1  | 2628668   | 365375.4  | 1513104   | 2069914   | 285157.6  |
| 1416268   | 389950.2  | 1246222   | 2452045   | 283560.7  | 2702078   | 323528.3  | 1205131   | 2152226   | 252821.2  |

|           |           |           |           |           |           |           |           |           |           |
|-----------|-----------|-----------|-----------|-----------|-----------|-----------|-----------|-----------|-----------|
| LP209.081 | LP209.081 | LP209.081 | LP209.117 | LP209.117 | LP209.153 | LP209.153 | LP209.153 | LP209.153 | LP209.153 |
| 319077.9  | 215724.2  | 549560.9  | 2305039   | 4976132   | 68873.5   | 52678.23  | 60570.74  | 81243.47  | 60936.67  |
| 436512.4  | 181483.4  | 733154.9  | 2294842   | 4965289   | 60273.35  | 52743.04  | 63085.46  | 75703.35  | 83381.5   |
| 538684.4  | 222872.1  | 629952.7  | 2209882   | 4878116   | 54426.83  | 57631.73  | 62867.88  | 74998     | 67445.76  |
| 367530.8  | 224618.9  | 626575.1  | 2065982   | 4413536   | 59507.88  | 52159.98  | 53260.75  | 63995.77  | 47893.57  |
| 527820.8  | 203402.5  | 596669.8  | 2053997   | 4451523   | 46541.46  | 52592.17  | 62210.7   | 83996.98  | 67942.95  |



|           |           |           |           |           |           |           |           |           |           |
|-----------|-----------|-----------|-----------|-----------|-----------|-----------|-----------|-----------|-----------|
| LP209.153 | LP209.154 | LP209.154 |
| 73096.3   | 33543.63  | 42245.04  | 47300.64  | 64606.57  | 34269.51  | 61565.4   | 52917.22  | 55863.11  | 41107.01  |
| 59064.72  | 55493.43  | 55079.3   | 52144.86  | 72027.96  | 33495.31  | 56225.7   | 58611.22  | 53233.58  | 43227.01  |
| 62854.3   | 50513.09  | 61550.22  | 53570.4   | 81330.16  | 34980.77  | 63044.53  | 60974.54  | 55338.54  | 42995.89  |
| 49751.33  | 55646.35  | 54932.56  | 49379.91  | 68267.64  | 37839.58  | 52898.6   | 56631.27  | 55398.1   | 45645.76  |
| 61582.44  | 52199.72  | 54091.99  | 49017.52  | 79770.37  | 36138.87  | 52445.98  | 61335.21  | 58852.26  | 47486.35  |

|           |           |           |           |           |           |           |           |           |           |
|-----------|-----------|-----------|-----------|-----------|-----------|-----------|-----------|-----------|-----------|
| LP209.153 | LP209.154 | LP209.154 | LP209.154 | LP209.153 | LP209.153 | LP209.153 | LP209.154 | LP209.153 | LP209.153 |
| 61930     | 61563.25  | 41763.66  | 48643     | 64406.93  | 50014.01  | 61759.61  | 62810.28  | 49531.06  | 39929.3   |
| 59579.49  | 54759.15  | 38403.82  | 49853.74  | 53796.64  | 59876.43  | 56929.41  | 61656.58  | 44942.27  | 36995.99  |
| 67435.73  | 57741.32  | 41341.08  | 48644.38  | 57764.19  | 57049.39  | 56190.59  | 59566.26  | 48388.23  | 40886.15  |
| 65628.34  | 57114.11  | 40945.7   | 52149.82  | 57644.91  | 58225.55  | 56113.96  | 60076.49  | 41480.1   | 36238.08  |
| 68649.32  | 59838.97  | 41506.45  | 52192.89  | 61074.6   | 59822.34  | 55850.87  | 61917.71  | 44519.6   | 35279.85  |

|           |           |           |           |           |           |           |           |           |           |
|-----------|-----------|-----------|-----------|-----------|-----------|-----------|-----------|-----------|-----------|
| LP209.154 | LP209.153 | LP209.153 | LP209.153 | LP209.153 | LP209.153 | LP209.153 | LP209.19_ | LP209.201 | LP209.201 |
| 63558.04  | 39593.81  | 55147.26  | 44851.1   | 63705.46  | 30238.31  | 41805.52  | 79672.71  | 75249.29  | 77318.13  |
| 61503.88  | 42726.55  | 58185.58  | 36833.64  | 61490.74  | 29744.45  | 35261.71  | 79395.63  | 74709.58  | 89959.9   |
| 60460.13  | 44478.67  | 53901.82  | 36718.75  | 62131     | 36835.18  | 45133.21  | 76844.13  | 72806.34  | 92088.66  |
| 64122.41  | 51417.28  | 55314.03  | 41742.77  | 68879.21  | 25460.13  | 38118.93  | 77453.85  | 74313.83  | 89927.55  |
| 53126.84  | 37656.12  | 60434.01  | 35062.95  | 62166.42  | 31840.6   | 49477.63  | 78713.15  | 75421.61  | 97865.83  |

|           |           |           |           |           |           |           |           |           |           |
|-----------|-----------|-----------|-----------|-----------|-----------|-----------|-----------|-----------|-----------|
| LP209.201 |
| 94306.07  | 62631.66  | 92018.75  | 67786.9   | 63840.71  | 45132.67  | 49786.7   | 51872.14  | 75790.65  | 54136.84  |
| 88594.17  | 48046.49  | 94036.93  | 63443.03  | 63026.25  | 53029.45  | 52645.62  | 58791.27  | 69946.91  | 52351.12  |
| 108184.5  | 58771.26  | 89506.91  | 75996.89  | 61734.24  | 70989.24  | 50763.01  | 55756.87  | 93308.37  | 52960.84  |
| 82794.92  | 53041.65  | 94607.4   | 62545.78  | 67631.57  | 49107.46  | 57222.05  | 56868.21  | 66852.17  | 52868.86  |
| 90903.83  | 61829.72  | 81098.15  | 59208.06  | 53787.74  | 45772.16  | 65524.93  | 62619.68  | 75150.92  | 53171.86  |

|           |           |           |           |           |           |           |           |           |           |           |
|-----------|-----------|-----------|-----------|-----------|-----------|-----------|-----------|-----------|-----------|-----------|
| LP209.201 | LP209.201 | LP209.202 | LP209.201 | LP209.528 |
| 64083.68  | 57794.89  | 36515.67  | 57134.91  | 41426.34  | 47338.5   | 39214.75  | 65228.08  | 46759     | 108318.2  |           |
| 56514.29  | 59303.09  | 35573.4   | 51917.11  | 46472.3   | 38774.82  | 36808.13  | 64039.64  | 43082.82  | 117718.1  |           |
| 67416.85  | 52726.27  | 37201.93  | 53490.24  | 44679.96  | 49075.4   | 39101.93  | 57873.67  | 46756.68  | 94345.82  |           |
| 59914.89  | 58429.01  | 37577.69  | 52529.78  | 45228.37  | 47385.83  | 41405.01  | 72073.09  | 41446.57  | 92654.34  |           |
| 45291.18  | 74993.41  | 48617.3   | 52018.43  | 45251.24  | 42494.58  | 41930.51  | 63226.4   | 48352.07  | 86117.57  |           |

|           |           |           |           |           |           |           |           |           |           |
|-----------|-----------|-----------|-----------|-----------|-----------|-----------|-----------|-----------|-----------|
| LP209.529 | LP209.528 | LP209.528 | LP209.530 | LP209.528 | LP209.529 | LP209.530 | LP209.529 | LP209.529 | LP209.528 |
| 65203.95  | 51512     | 84315.03  | 70755.34  | 65210.6   | 45955.92  | 109656.9  | 74119.24  | 85930.82  | 63687.84  |
| 64634.97  | 92776.22  | 111802.5  | 55062.47  | 64836.22  | 61169.14  | 81806.48  | 115754.3  | 100992.4  | 85764.3   |
| 72746.95  | 86218.06  | 89104.18  | 53744.84  | 67218.25  | 42652.24  | 67467.03  | 78186.9   | 68390.17  | 75214.59  |
| 59155     | 58252.1   | 80418.58  | 99157.67  | 104618.5  | 58346.24  | 65147.57  | 84898.75  | 77416.88  | 76365.02  |
| 69241.99  | 89777.1   | 107852.4  | 58613.8   | 67882.11  | 40567.07  | 123166.9  | 102664.4  | 80716.28  | 111048.1  |

|           |           |           |           |           |           |           |           |           |           |
|-----------|-----------|-----------|-----------|-----------|-----------|-----------|-----------|-----------|-----------|
| LP209.529 | LP209.529 | LP209.529 | LP209.529 | LP209.527 | LP209.529 | LP209.529 | LP209.529 | LP209.529 | LP209.528 |
| 45250.53  | 70761.44  | 58911.29  | 55712.36  | 63276.41  | 54509.26  | 66957.83  | 55020.24  | 52340.64  | 86893.86  |
| 43320.2   | 75057.64  | 57834.61  | 38105.78  | 61057.81  | 112388.1  | 60335.4   | 97875.73  | 52185.65  | 87959.98  |
| 46600.92  | 54804.54  | 48967.31  | 35201.87  | 60248.6   | 59758.16  | 40098.94  | 51091     | 49523.86  | 71439.34  |
| 47146.95  | 62358.56  | 47897.66  | 42136.88  | 75164.85  | 62724.34  | 101926.3  | 68869.62  | 76857.29  | 61024.16  |
| 50558.96  | 53633.53  | 54686     | 56664.79  | 89258.7   | 64407.3   | 49869.61  | 69157.11  | 45084.56  | 56317.75  |

|           |           |           |           |           |           |           |           |           |           |
|-----------|-----------|-----------|-----------|-----------|-----------|-----------|-----------|-----------|-----------|
| LP209.529 | LP209.529 | LP209.528 | LP209.528 | LP209.529 | LP209.529 | LP209.528 | LP209.530 | LP209.528 | LP209.530 |
| 70302.92  | 52328.95  | 52737.11  | 63070.06  | 89143.49  | 59436.13  | 54349.06  | 71837.69  | 81536.22  | 52626.21  |
| 57322.63  | 62684.95  | 55402.46  | 73003.87  | 61674.12  | 54378.25  | 79453.53  | 60074.8   | 62495.87  | 58603.09  |
| 57792.07  | 50987.44  | 45705.39  | 49682.48  | 92297.88  | 97659.22  | 60057.73  | 56212.27  | 55476.69  | 45316.83  |
| 58147.19  | 58781.99  | 47605.82  | 53651.74  | 68502.9   | 74962.88  | 61851.35  | 62729.52  | 92179.79  | 51530.1   |
| 54642.24  | 63214.46  | 46008.55  | 55785.15  | 48965.99  | 52087.27  | 63536.87  | 56388.2   | 53452.48  | 48815.94  |



|            |           |            |            |            |            |            |            |            |            |
|------------|-----------|------------|------------|------------|------------|------------|------------|------------|------------|
| LP209.529' | LP209.528 | LP209.528' | LP209.530' | LP209.529' | LP209.528' | LP209.528' | LP209.528' | LP209.527' | LP209.528' |
| 55267.02   | 61536.16  | 40996.37   | 51518.02   | 61324.14   | 52938.4    | 41191.79   | 39331.64   | 84144.24   | 47748.77   |
| 54111.42   | 56552.84  | 55909.95   | 77333.34   | 65898.72   | 51017.17   | 51214.13   | 44943.82   | 51389.28   | 49866.7    |
| 49968.34   | 51316.43  | 42613.98   | 39046      | 30046.11   | 44476.49   | 46256.46   | 52136.19   | 38886.51   | 43517.14   |
| 47294.38   | 57791.05  | 72587.55   | 42175.6    | 31113.66   | 49617.86   | 48945.18   | 44557.86   | 44438.86   | 46087.71   |
| 57662.44   | 58671.78  | 49088.28   | 40975.33   | 31548.39   | 40240.62   | 50835.96   | 52065.77   | 47003.2    | 47148.54   |

|           |           |           |           |           |           |           |           |           |           |
|-----------|-----------|-----------|-----------|-----------|-----------|-----------|-----------|-----------|-----------|
| LP209.528 | LP209.531 | LP209.529 | LP209.530 | LP209.527 | LP209.529 | LP209.529 | LP209.529 | LP209.530 | LP209.528 |
| 50708.52  | 71643.92  | 56801.72  | 62515.06  | 34750.13  | 43205.87  | 31498.98  | 39118.74  | 19221.29  | 29239.15  |
| 66371.35  | 60460.46  | 53456.87  | 65877.15  | 38434.51  | 39775.99  | 51805.75  | 43508.24  | 26968.81  | 37492.43  |
| 45412.38  | 48811.47  | 44515.14  | 36522.44  | 37144.66  | 33664.13  | 31125.65  | 40930.62  | 17217.07  | 29019.77  |
| 50751.42  | 77461.26  | 45477.97  | 43979.99  | 38646.19  | 30695.88  | 31577.25  | 42217.45  | 17716.25  | 29989.21  |
| 52140.21  | 64069.52  | 48024.33  | 39671.87  | 34249.85  | 31053.87  | 32199.67  | 42249.47  | 17309.07  | 31859.43  |

|           |           |           |           |           |           |           |           |           |           |
|-----------|-----------|-----------|-----------|-----------|-----------|-----------|-----------|-----------|-----------|
| LP209.528 | LP209.529 | LP209.529 | LP209.529 | LP209.528 | LP209.529 | LP209.530 | LP209.53_ | LP209.529 | LP209.529 |
| 45203.19  | 46788.9   | 20393.75  | 26635.56  | 29242.34  | 27939.77  | 21078.27  | 25761.04  | 15451.86  | 30933.15  |
| 61426.34  | 59712.27  | 29676.58  | 39894.96  | 31568.77  | 39124.03  | 30244.56  | 38250.69  | 15869.26  | 44938.03  |
| 42691.96  | 46794.93  | 19889.32  | 27010.67  | 31038.81  | 28482.05  | 21725.07  | 25453.3   | 14854.19  | 32151.89  |
| 42934.58  | 47515.49  | 19803.51  | 26285     | 33723.83  | 28451.38  | 21335.94  | 25749.06  | 13181.97  | 32357.35  |
| 41122.69  | 46132.84  | 19622.46  | 25917.72  | 33119.95  | 27672.61  | 22547.34  | 24290.64  | 14937.96  | 32560.06  |

|           |           |           |           |           |           |           |           |           |           |
|-----------|-----------|-----------|-----------|-----------|-----------|-----------|-----------|-----------|-----------|
| LP209.529 | LP209.529 | LP209.529 | LP209.529 | LP209.530 | LP209.533 | LP209.533 | LP210.084 | LP210.084 | LP210.084 |
| 14345.32  | 16177.93  | 30491.65  | 30400.13  | 17437.2   | 50772.98  | 49520.3   | 63679.65  | 304292.4  | 286428    |
| 16570.15  | 18245.41  | 43165.38  | 44139.75  | 15856.14  | 47215.94  | 50738.93  | 53886.32  | 320568.4  | 265399    |
| 13760.88  | 14744.7   | 30880.92  | 30917.83  | 15762.49  | 51166.54  | 51544.36  | 55174.31  | 365596.3  | 263102.2  |
| 12849.66  | 14754.11  | 29898.8   | 29956.92  | 15567.96  | 47372.45  | 67662.94  | 40027.57  | 236535.8  | 224160.4  |
| 13587.01  | 15027.63  | 28594.9   | 32127.32  | 15310.55  | 67296.02  | 47992.61  | 57114.76  | 369018.2  | 435930.4  |

|           |           |           |           |           |           |           |           |           |           |
|-----------|-----------|-----------|-----------|-----------|-----------|-----------|-----------|-----------|-----------|
| LP210.084 |
| 516307.1  | 396935.4  | 259880.6  | 336234.6  | 465158.2  | 270076.4  | 40242.51  | 312644.3  | 461181.6  | 590521    |
| 644066.2  | 259519.3  | 256031.1  | 395218    | 396968.2  | 292022.9  | 54223.41  | 336113.7  | 508556.3  | 481757.7  |
| 883774.1  | 285587.4  | 273173.1  | 301033.7  | 475067.1  | 235753.8  | 46046.58  | 379766.7  | 513936.2  | 627748.1  |
| 623524.9  | 378494.2  | 212397    | 352514.5  | 368238.9  | 211457.7  | 60138.93  | 295258.3  | 540230.8  | 471748.2  |
| 484125    | 388682.4  | 339031    | 479636.1  | 379254.2  | 301489.3  | 48771.87  | 437847.1  | 473459.7  | 560004.4  |

|           |           |           |           |           |           |           |           |           |           |
|-----------|-----------|-----------|-----------|-----------|-----------|-----------|-----------|-----------|-----------|
| LP210.084 |
| 519005.1  | 402422.4  | 168204.1  | 558579.2  | 74239.24  | 308814.8  | 141642.5  | 197064.6  | 163922.7  | 149778.6  |
| 637635.5  | 463112.9  | 246512    | 549440.4  | 89659.59  | 226061.4  | 238488.5  | 238761.3  | 173534.6  | 161297.7  |
| 523887.1  | 472262.9  | 424660.1  | 451638.7  | 88534.71  | 247996.2  | 178773.9  | 180625    | 267609.3  | 172104.4  |
| 451133.6  | 611236.1  | 208869.7  | 370385.3  | 56599.08  | 300150.6  | 183664.3  | 207986.2  | 152270.5  | 170846.8  |
| 606552.1  | 456246.4  | 290513.8  | 438014.7  | 104374.3  | 202793    | 285301.9  | 273728.3  | 230742.5  | 202117.6  |

|           |           |           |           |           |           |           |           |           |           |
|-----------|-----------|-----------|-----------|-----------|-----------|-----------|-----------|-----------|-----------|
| LP210.084 |
| 223636.6  | 497046.1  | 76786.62  | 230325.2  | 214387.6  | 345096.4  | 304089.8  | 502622.3  | 284635.9  | 282741.8  |
| 213712.2  | 688441.9  | 52277.13  | 263006    | 209635.1  | 276850.1  | 272670.2  | 466331    | 324298.6  | 223674.1  |
| 337926    | 510029.1  | 71808.8   | 196162.9  | 234951.2  | 415122.6  | 370146.2  | 501631.9  | 477407.2  | 325629.8  |
| 189647    | 468828.1  | 54332.99  | 200745.7  | 187830    | 335000.3  | 336422.6  | 575475.8  | 286147    | 313684    |
| 259873.3  | 741647    | 71287.72  | 203949.6  | 241830.4  | 374165.6  | 384649.1  | 592405.6  | 376377.1  | 249300.1  |

|           |           |           |           |           |           |           |           |           |           |
|-----------|-----------|-----------|-----------|-----------|-----------|-----------|-----------|-----------|-----------|
| LP210.084 |
| 27029.76  | 189427.6  | 471370.1  | 201527.2  | 266037.2  | 209681.4  | 198811.5  | 178413.5  | 208412.5  | 488578.7  |
| 28690.21  | 228462.8  | 427120.8  | 309999.5  | 202196.8  | 389684.4  | 203359.3  | 229451.8  | 429176.9  | 458201.4  |
| 36301.12  | 215688.5  | 420391.9  | 270325    | 220807.5  | 323011.9  | 228926.1  | 247651.1  | 270356.6  | 499533.8  |
| 22193.94  | 224618.6  | 563570.1  | 197079.9  | 166873.9  | 295018.7  | 154849.3  | 220988.9  | 230597.7  | 340052.7  |
| 19035.13  | 195069.8  | 608079.2  | 227619.6  | 317229.4  | 273619.2  | 217209.1  | 240034.2  | 300319.6  | 370418.3  |



|           |           |           |           |           |           |           |           |           |           |
|-----------|-----------|-----------|-----------|-----------|-----------|-----------|-----------|-----------|-----------|
| LP210.084 |
| 618079    | 289787.4  | 514777.2  | 417517.4  | 231836.9  | 312635.3  | 258335.9  | 176019.9  | 243356.4  | 334909.7  |
| 395252.3  | 243771.2  | 675894.8  | 432253.4  | 246568.8  | 502202.5  | 323865.8  | 210635.9  | 187662.4  | 375358.6  |
| 391228.9  | 221395.5  | 698269.4  | 421204.6  | 234322.4  | 350420.5  | 201237.8  | 246256.1  | 212518.8  | 515277.8  |
| 377517.2  | 295068.1  | 400406.8  | 364976.6  | 198951.6  | 289121.3  | 222515.2  | 174579.3  | 208338.4  | 429337.7  |
| 416683.8  | 289530.7  | 959311.9  | 431141.9  | 297808.5  | 340040.8  | 287502.4  | 255800.1  | 294072.4  | 525631.8  |

|           |           |           |           |           |           |           |           |           |           |
|-----------|-----------|-----------|-----------|-----------|-----------|-----------|-----------|-----------|-----------|
| LP210.084 |
| 250746.6  | 344857.2  | 356341.2  | 305276.8  | 49752.33  | 293701.7  | 164316.9  | 299272.4  | 223820.6  | 65706.75  |
| 223978.6  | 374037.1  | 359996.6  | 310501    | 45908.79  | 417416.2  | 213398.2  | 328320.5  | 202120.4  | 116237    |
| 302882.6  | 398818.9  | 435011.5  | 336210.5  | 54931.59  | 560599.7  | 340488    | 334229.8  | 214324.6  | 107334.2  |
| 209620.8  | 351957.6  | 427080.6  | 224815.2  | 33191.82  | 527226.4  | 199866.6  | 305697.4  | 231937.3  | 70330.29  |
| 274733.5  | 343415.3  | 519924.8  | 260903.6  | 45298.75  | 325656.2  | 214021.8  | 487399.7  | 320965.1  | 102699    |

|           |           |           |           |           |           |           |           |           |           |
|-----------|-----------|-----------|-----------|-----------|-----------|-----------|-----------|-----------|-----------|
| LP210.084 |
| 60534.09  | 635548.3  | 189438.6  | 232217.9  | 155486    | 190930.4  | 417053.3  | 451603.3  | 37631.83  | 202175.7  |
| 52511.66  | 923292.3  | 139426.7  | 304374.9  | 137940.9  | 167024.8  | 462122.3  | 421232.7  | 41158.33  | 186841.2  |
| 68423.01  | 631384.2  | 238575.2  | 270894.4  | 135498.9  | 197238.7  | 340783.6  | 364246.6  | 49716.98  | 185605.1  |
| 62234.62  | 894538.4  | 191419.5  | 203838.8  | 127612.4  | 184553.9  | 401602.8  | 326403.9  | 40106.29  | 277568    |
| 53197.94  | 690906.1  | 110968.6  | 351646.2  | 147501.9  | 218203.8  | 445675.6  | 452238.1  | 34372.73  | 213873.4  |

|           |           |           |           |           |           |           |           |           |           |
|-----------|-----------|-----------|-----------|-----------|-----------|-----------|-----------|-----------|-----------|
| LP210.084 |
| 30773.53  | 399911.7  | 52229.53  | 32303.88  | 37792.29  | 52036.62  | 251569.3  | 38295.26  | 371282.4  | 30626.9   |
| 27622.44  | 373541.3  | 72221.47  | 25901.48  | 61017.36  | 63891.46  | 365506.2  | 37566.44  | 385254.6  | 38944.59  |
| 42050.29  | 398268.3  | 52345.24  | 30906.09  | 43441.14  | 56184.3   | 234833.8  | 33340.89  | 353546.3  | 52115.33  |
| 35003.47  | 661321    | 65379.55  | 36845.66  | 35655.79  | 58339.34  | 228687.5  | 31297.74  | 308178    | 27792.12  |
| 27408.52  | 358944.1  | 49468.04  | 29943.93  | 37271.44  | 71884.12  | 361894.7  | 27614.09  | 313453.4  | 31208.08  |

|           |           |           |           |           |           |           |           |           |           |
|-----------|-----------|-----------|-----------|-----------|-----------|-----------|-----------|-----------|-----------|
| LP210.084 | LP211.086 | LP211.086 | LP211.085 | LP211.086 | LP211.086 | LP211.085 | LP211.085 | LP211.086 | LP211.085 |
| 261819.5  | 83568.86  | 90496.89  | 59761.3   | 84705.33  | 93564.3   | 54481.08  | 84791.64  | 64626.62  | 66117     |
| 270060    | 82132.04  | 84275.81  | 56960.98  | 85180.62  | 88857.66  | 52025.7   | 89400.77  | 73140.12  | 70958.17  |
| 206738    | 88689.48  | 86328.19  | 57544.03  | 93824.84  | 91854.98  | 53795.04  | 84024.25  | 66212.16  | 70599.84  |
| 296375.1  | 91136.9   | 83309.67  | 69980.46  | 84506.27  | 101556.1  | 50048.75  | 88917.65  | 72784.9   | 77932.95  |
| 256946.7  | 41566.09  | 85327.72  | 60636.11  | 94786.56  | 94968.02  | 57166.61  | 89195.99  | 70885.87  | 35441.62  |

|           |           |           |           |           |           |           |           |           |           |
|-----------|-----------|-----------|-----------|-----------|-----------|-----------|-----------|-----------|-----------|
| LP211.085 | LP211.086 | LP211.086 | LP211.086 | LP211.086 | LP211.085 | LP211.092 | LP211.092 | LP211.092 | LP211.092 |
| 71245.33  | 72866.79  | 55391.92  | 64322.47  | 96059.79  | 108842.4  | 92675.43  | 55496.23  | 46225.13  | 68020.05  |
| 73661.3   | 70982.94  | 57773.61  | 76417.64  | 93857.51  | 96202.74  | 88179.23  | 54602.51  | 50624.08  | 71214.56  |
| 79309.87  | 72824.79  | 61071.89  | 63611.18  | 97094.33  | 103285.4  | 91791.57  | 60099.51  | 48099.57  | 68494.12  |
| 85787.55  | 79637.68  | 56253.16  | 59596.45  | 90654.87  | 102406.4  | 92096.81  | 52260     | 46382.47  | 65550.49  |
| 83355.9   | 71203.91  | 60815.83  | 66055.02  | 102158    | 112772.1  | 94509.58  | 57403.38  | 50239.86  | 58691.21  |

|           |           |           |           |           |           |           |           |           |           |
|-----------|-----------|-----------|-----------|-----------|-----------|-----------|-----------|-----------|-----------|
| LP211.092 | LP211.093 |
| 79103.55  | 54500.62  | 88023.42  | 55313.92  | 46205.17  | 64084.86  | 81277.27  | 88181.47  | 68267.46  | 48141.83  |
| 81126.09  | 55272.73  | 89886.93  | 56938.33  | 51846.21  | 71104.78  | 85122.43  | 85378.71  | 62614.22  | 42815.77  |
| 78999.81  | 57657.19  | 90502.53  | 57783.18  | 53662.13  | 69329.98  | 84887.09  | 91641.53  | 66053.99  | 45199.31  |
| 77898.52  | 58857.32  | 97721.19  | 57759.72  | 50335.32  | 68621.64  | 83022.18  | 88693.45  | 66090.89  | 48060.94  |
| 79119.31  | 51691.1   | 100236.2  | 54188.5   | 50145.38  | 67604.3   | 86361.43  | 96981.48  | 69189.05  | 46527.26  |

|           |           |           |           |           |           |           |           |           |           |
|-----------|-----------|-----------|-----------|-----------|-----------|-----------|-----------|-----------|-----------|
| LP211.093 | LP211.093 | LP211.093 | LP211.093 | LP211.094 | LP211.093 | LP211.093 | LP211.092 | LP211.093 | LP211.093 |
| 60641.26  | 69473.48  | 54954.31  | 62414.86  | 62313.54  | 59428.04  | 80589.19  | 76061.96  | 47120.91  | 54848.45  |
| 61326.36  | 64557.21  | 51897.66  | 66962.11  | 65650.32  | 65074.04  | 79742.19  | 76640.59  | 50078.87  | 56878.86  |
| 61160.68  | 59762.16  | 51095.5   | 68605.58  | 62968.26  | 61096.14  | 77211.64  | 76662.22  | 51547.95  | 57402.36  |
| 59920.4   | 65886.8   | 56943.84  | 60631.4   | 58191.14  | 57889.83  | 81981.8   | 74675.38  | 56769.11  | 62178.59  |
| 58994.38  | 66155.55  | 53924.26  | 62661.03  | 54828.1   | 57528.84  | 87006.92  | 77964.66  | 48794.48  | 58684.41  |



|           |           |           |           |           |           |           |           |           |           |
|-----------|-----------|-----------|-----------|-----------|-----------|-----------|-----------|-----------|-----------|
| LP211.093 | LP211.092 | LP211.093 | LP211.093 | LP211.093 | LP211.093 | LP211.092 | LP211.093 | LP211.092 | LP211.093 |
| 63900.3   | 47394.64  | 63908.69  | 46928.35  | 86071.65  | 52205.1   | 56810.08  | 99574     | 86138.52  | 58665.91  |
| 58216.78  | 48525.91  | 63868.03  | 43512.28  | 77336.13  | 51558.51  | 56148.33  | 107512.6  | 86388.64  | 55514.89  |
| 58409.68  | 42271.35  | 59679.29  | 47443.25  | 85429.52  | 49947.03  | 55341.12  | 109303    | 79877.12  | 66751.76  |
| 62137.2   | 44829.79  | 59801.03  | 44508.14  | 82153.71  | 47977.04  | 59484.49  | 107157.9  | 82403.78  | 63107.11  |
| 66344.07  | 45025.03  | 51485.73  | 42877.25  | 85407.47  | 46278.7   | 57762.3   | 98720.54  | 82245.83  | 59720.95  |

|           |           |           |           |           |           |           |           |           |           |
|-----------|-----------|-----------|-----------|-----------|-----------|-----------|-----------|-----------|-----------|
| LP211.093 | LP211.109 | LP211.132 |
| 62926.71  | 88573.48  | 73540.24  | 79201.6   | 79709.61  | 69101.42  | 47958.77  | 58680.09  | 157929    | 55848.08  |
| 63305.21  | 94344.58  | 70441.63  | 73581.19  | 70553.72  | 84056.13  | 46028.76  | 56377.4   | 38766.6   | 58542.12  |
| 60513.94  | 94293.74  | 69474.72  | 84810.59  | 76903.63  | 79350.83  | 49572.29  | 53393.71  | 63643.81  | 66713.56  |
| 57925.27  | 84224.64  | 70273.41  | 70037.51  | 72084.9   | 79341.23  | 53257.24  | 59951     | 105638.4  | 62171.11  |
| 66542.91  | 90306.76  | 68688.23  | 76512.85  | 79379.79  | 79293.14  | 48118.99  | 67924.04  | 86018.59  | 63918.72  |

|           |           |           |           |           |           |           |           |           |           |
|-----------|-----------|-----------|-----------|-----------|-----------|-----------|-----------|-----------|-----------|
| LP211.132 | LP211.133 | LP211.132 |
| 98310.47  | 65548.45  | 74286.24  | 90504.69  | 105385.9  | 92267.24  | 86848.24  | 83537.52  | 111360.2  | 78804.22  |
| 102283.4  | 67220.31  | 67524.74  | 85124.67  | 129150.1  | 96307.84  | 98133.14  | 81514.78  | 125132.2  | 100413.2  |
| 99838.64  | 72737.06  | 81157.6   | 89967.92  | 75880.34  | 84350.36  | 104872.8  | 76938.57  | 80881.6   | 78253.51  |
| 87296.29  | 66772.92  | 73891.11  | 88857.27  | 128180    | 104472.8  | 85854.42  | 79332.54  | 82599.95  | 68022.75  |
| 95415.32  | 63608.55  | 72299.13  | 85986.19  | 90554.84  | 98054.55  | 93994.83  | 79434.18  | 87089.09  | 70972.2   |

|           |           |           |           |           |           |           |           |           |           |
|-----------|-----------|-----------|-----------|-----------|-----------|-----------|-----------|-----------|-----------|
| LP211.132 | LP211.132 | LP211.132 | LP211.132 | LP211.132 | LP211.132 | LP211.133 | LP211.132 | LP211.133 | LP211.132 |
| 80585.85  | 90836.96  | 74263.98  | 76924.28  | 81229.94  | 85661.88  | 68046.38  | 85886.18  | 102456.1  | 87505.83  |
| 115671.6  | 89863.95  | 82518.09  | 82472.07  | 78931.42  | 83188.51  | 65904.8   | 83957.33  | 97457.11  | 111643.7  |
| 87269.45  | 99732.12  | 127710.9  | 86219.12  | 85654.76  | 79686.11  | 65473.17  | 88258.99  | 116010.2  | 132548    |
| 82530.1   | 92007.24  | 83542.66  | 83252.32  | 75876.89  | 81761.33  | 62049.82  | 83349.11  | 104298.5  | 115135.5  |
| 72093.73  | 97870.61  | 76593.69  | 82130.54  | 78389.05  | 81060.72  | 61617.44  | 84960.37  | 100536.9  | 110621.2  |

|           |           |           |           |           |           |           |           |           |           |
|-----------|-----------|-----------|-----------|-----------|-----------|-----------|-----------|-----------|-----------|
| LP211.133 | LP211.132 | LP211.132 | LP211.133 | LP211.132 | LP211.133 | LP211.133 | LP211.133 | LP211.132 | LP211.132 |
| 87221.57  | 84250.88  | 75446.77  | 86344.74  | 92113.19  | 98373.52  | 56549.41  | 62413.06  | 98516.98  | 80302.23  |
| 87193.12  | 82158.88  | 64534.69  | 74124.68  | 88287.33  | 99246.84  | 75624.42  | 64310.94  | 89308.96  | 92893.29  |
| 89982.66  | 84513.3   | 69521.29  | 75853.46  | 101727.8  | 99029.23  | 68313.06  | 71182.87  | 85838.8   | 88938.14  |
| 84828.05  | 90169.98  | 68269.63  | 82379.76  | 89621.02  | 96782.7   | 70908.95  | 62774.14  | 90863.79  | 87106.19  |
| 90855.25  | 86720.5   | 71179.95  | 83541.51  | 92448.1   | 114464.2  | 63668.63  | 66629.43  | 88177.54  | 96590.67  |

|           |           |           |           |           |           |           |           |           |           |
|-----------|-----------|-----------|-----------|-----------|-----------|-----------|-----------|-----------|-----------|
| LP211.133 | LP211.132 | LP211.133 | LP211.132 | LP211.132 | LP211.133 | LP211.133 | LP211.133 | LP211.133 | LP211.132 |
| 75461.64  | 95652.16  | 83108.2   | 76658.79  | 62102.51  | 72050.53  | 78816.14  | 56388.9   | 80179.82  | 96380.95  |
| 76532.08  | 99233.41  | 87210.25  | 79881.59  | 63662.91  | 79229.74  | 80499.47  | 62566.11  | 81556.72  | 93513.77  |
| 79461.91  | 93622.25  | 90300.19  | 94356     | 60228.5   | 68838.5   | 80647.53  | 60230.39  | 75412.16  | 95086.47  |
| 74509.01  | 103910    | 74037.56  | 71238.34  | 66574.69  | 73448.35  | 81292.86  | 61320.02  | 78915.25  | 90905.64  |
| 79982.25  | 102514.5  | 83786.93  | 64502.89  | 60311.22  | 69930.48  | 86278.48  | 64633.56  | 84128.74  | 92076.28  |

|           |           |           |           |           |           |           |           |           |           |           |
|-----------|-----------|-----------|-----------|-----------|-----------|-----------|-----------|-----------|-----------|-----------|
| LP211.133 | LP211.133 | LP211.132 | LP211.133 |
| 96346.3   | 76669.89  | 70519.29  | 73149.3   | 59136.2   | 72220.59  | 57742.01  | 82458.18  | 52893.75  | 70885.93  |           |
| 93688.55  | 75755.35  | 74200.2   | 75253.99  | 65291.44  | 77529.75  | 60851.85  | 77868.69  | 50709.18  | 70435.64  |           |
| 98339.87  | 76680.92  | 79756.26  | 71408.13  | 79286.8   | 70604.7   | 68200.83  | 79819.59  | 53042.43  | 76039.11  |           |
| 94974.54  | 68983.24  | 71938.6   | 74886.19  | 57322.34  | 67343.39  | 55848.13  | 78201.14  | 55520.82  | 65814.53  |           |
| 100594.7  | 71444.52  | 67569.7   | 73206.46  | 63050.58  | 64087.38  | 51058.66  | 78573.9   | 56644.88  | 67241.93  |           |

|           |           |           |           |           |           |           |           |           |           |
|-----------|-----------|-----------|-----------|-----------|-----------|-----------|-----------|-----------|-----------|
| LP211.133 | LP211.133 | LP211.132 | LP211.133 | LP211.169 | LP211.169 | LP211.169 | LP211.169 | LP211.169 | LP211.169 |
| 76994.84  | 64266.98  | 47530.69  | 54625.86  | 32514.34  | 31734.46  | 30561.81  | 40121.82  | 28640.84  | 25258.65  |
| 80426.2   | 66467.13  | 53752.05  | 55108.71  | 33913     | 31918.56  | 33850.99  | 40525.88  | 28249.17  | 26199.04  |
| 70943.9   | 64516.13  | 60164.36  | 58580.2   | 32540.35  | 31735.38  | 28544.54  | 39275.05  | 28578.63  | 26430.99  |
| 69126.75  | 69971.96  | 54870.97  | 56430.74  | 30206.55  | 33005.83  | 29556.62  | 40245.51  | 25867.46  | 27388.61  |
| 66469.49  | 67417.07  | 51035.58  | 54516.64  | 43746.44  | 53763.64  | 42343.22  | 45148.6   | 26437.11  | 26700.92  |



|           |           |           |           |           |           |           |           |           |           |
|-----------|-----------|-----------|-----------|-----------|-----------|-----------|-----------|-----------|-----------|
| LP211.169 |
| 30957.49  | 35922.99  | 22193.48  | 40446.51  | 25148.12  | 49477.3   | 19852.08  | 30358.61  | 43086.13  | 35691.03  |
| 33895.48  | 37749.57  | 25530.82  | 40284.83  | 26488.92  | 51428.7   | 21025.79  | 35096.06  | 44824.4   | 30531.3   |
| 29845.56  | 33651.61  | 25688.37  | 42009.09  | 25069.11  | 52653.78  | 21481.39  | 32700.22  | 44432.49  | 33150.65  |
| 33382.24  | 41026.7   | 25843.53  | 40998.38  | 23153.71  | 52057.18  | 28313.65  | 32743.53  | 48522.61  | 41114     |
| 32740.67  | 39941.97  | 25575.17  | 44253.52  | 26489     | 55157.8   | 26300.18  | 33178.29  | 45356.34  | 40902.81  |

|           |           |           |           |           |           |           |           |           |           |
|-----------|-----------|-----------|-----------|-----------|-----------|-----------|-----------|-----------|-----------|
| LP211.169 | LP211.169 | LP211.169 | LP211.169 | LP212.113 | LP212.128 | LP212.128 | LP212.128 | LP212.128 | LP212.128 |
| 34852.15  | 43292.77  | 29400.16  | 44244.95  | 11529.85  | 26509.69  | 29710.73  | 27701.04  | 35338.51  | 22370.37  |
| 31303.02  | 43290.4   | 29505.15  | 42699.61  | 7314.165  | 23478.87  | 26168.95  | 23956.99  | 36379.34  | 20044.27  |
| 31308.97  | 49523.12  | 31421.46  | 41280.24  | 10594.32  | 27502.82  | 28739.22  | 26642.19  | 36139.53  | 23058.93  |
| 31505.27  | 46036.41  | 31725.21  | 46842.6   | 9421.909  | 24202.63  | 33449.26  | 24878     | 38731.88  | 27111.39  |
| 32421.98  | 45218     | 30712.83  | 47127.56  | 11935.18  | 32223.69  | 38272.46  | 28078.17  | 44948.79  | 26521.87  |

|           |           |           |           |           |           |           |           |           |           |
|-----------|-----------|-----------|-----------|-----------|-----------|-----------|-----------|-----------|-----------|
| LP212.128 | LP212.143 | LP212.143 | LP212.143 | LP212.143 | LP212.143 | LP212.164 | LP212.200 | LP212.200 | LP212.201 |
| 22850.29  | 25428.45  | 22987.25  | 34543.25  | 26564.82  | 38692     | 87906.9   | 89003.43  | 101820    | 97412.09  |
| 22970.16  | 23634.64  | 23295.42  | 29051.07  | 25538.56  | 39573.22  | 95072.95  | 113925.2  | 118685.3  | 108262.6  |
| 22972.05  | 26467.88  | 25335.38  | 31228.99  | 25613.55  | 43322.08  | 88770.65  | 108481.5  | 94900.92  | 113217.5  |
| 23329.73  | 24195.91  | 28679.26  | 36823.93  | 25380.23  | 50741.55  | 87016.04  | 130632.2  | 89367.87  | 113248.9  |
| 24983.66  | 29432     | 30875.97  | 36122.75  | 29698.98  | 48709.43  | 88026.76  | 152780    | 118251.9  | 70198.48  |

|           |           |           |           |           |           |           |           |           |           |
|-----------|-----------|-----------|-----------|-----------|-----------|-----------|-----------|-----------|-----------|
| LP212.200 | LP212.201 | LP212.200 |
| 103148.9  | 96809.72  | 67471.4   | 78033.68  | 91842.43  | 72358.22  | 74119.89  | 85220.77  | 83524.18  | 95363.53  |
| 108440.3  | 109108.8  | 98204.03  | 84216.9   | 82337.02  | 69167.4   | 88172.88  | 73395.19  | 80060.12  | 91904.61  |
| 104167.4  | 120862.7  | 94308.82  | 80689.65  | 85052.05  | 66377.58  | 85781.26  | 67138.79  | 79002.85  | 87847.83  |
| 136396.8  | 118528.7  | 83940.87  | 113983.4  | 70709.49  | 62915.65  | 88390.04  | 74841.74  | 80830.35  | 90437.54  |
| 83166.03  | 139923.7  | 90610.85  | 80613.45  | 77907.88  | 92394.35  | 86275.44  | 63094.53  | 87394.5   | 82309.06  |

|           |           |           |           |           |           |           |           |           |           |
|-----------|-----------|-----------|-----------|-----------|-----------|-----------|-----------|-----------|-----------|
| LP212.200 |
| 121792.8  | 81271.98  | 74994.68  | 67727.42  | 85867.74  | 81877.09  | 68955.57  | 75706.47  | 33118.15  | 87027.79  |
| 94572.57  | 77298.03  | 73019.73  | 76197.82  | 70131.01  | 63243.58  | 65176.62  | 69523.62  | 34632.88  | 70300.52  |
| 89207.3   | 77233.42  | 75152.98  | 81609.15  | 74620.95  | 64336.34  | 67650.1   | 75128.65  | 33552.54  | 66926.23  |
| 87994.52  | 78873.41  | 75469.61  | 71230.32  | 71624.61  | 70269.56  | 64132.98  | 75407.07  | 49083.98  | 65471.87  |
| 90011.69  | 84832.49  | 71951.64  | 77405.65  | 74119.23  | 66298.36  | 64548.31  | 69394.02  | 32568.7   | 72013.62  |

|           |           |           |           |           |           |           |           |           |           |
|-----------|-----------|-----------|-----------|-----------|-----------|-----------|-----------|-----------|-----------|
| LP212.200 | LP212.200 | LP213.112 |
| 69988.88  | 80549.73  | 46638.27  | 42902.64  | 48027.37  | 48051.52  | 44431     | 37251.36  | 40230.14  | 39621.84  |
| 60619.19  | 65144.02  | 47871     | 44128.89  | 43108.31  | 50505.94  | 47068.19  | 36386.47  | 39948.98  | 42274.19  |
| 63035.62  | 80352.64  | 52336.31  | 36278.98  | 52485.17  | 51349.22  | 40145.38  | 36458.77  | 41252.82  | 36778.57  |
| 71264.61  | 77706.64  | 52470.77  | 47346.01  | 50904.22  | 53255.76  | 48936.7   | 39717.73  | 34666.97  | 46179.41  |
| 68677.95  | 76915.71  | 45996.19  | 45233.73  | 50007.94  | 53798.55  | 50529.99  | 39822.56  | 42301.81  | 44730.67  |

|           |           |           |           |           |           |           |           |           |           |
|-----------|-----------|-----------|-----------|-----------|-----------|-----------|-----------|-----------|-----------|
| LP213.112 |
| 33147.04  | 54447.42  | 48062.46  | 34349.35  | 45089.44  | 47943.42  | 36973.19  | 34391.58  | 51139.23  | 43728.71  |
| 36471.62  | 53419.04  | 48025.69  | 32787.45  | 50844.83  | 45439.7   | 37715.59  | 31349.25  | 48900.08  | 46597.1   |
| 33290.24  | 55940.43  | 43548.06  | 36044.85  | 44274.72  | 47778.54  | 38136.99  | 33008.46  | 50162.5   | 48290.32  |
| 35698.25  | 55123.21  | 46801.76  | 33974.25  | 49902.26  | 50817.24  | 43322.45  | 34348.84  | 54008.58  | 48421.37  |
| 34221.49  | 56466.95  | 53967.4   | 32950.66  | 50397.02  | 53138.39  | 38723.09  | 33723.92  | 54611.66  | 47759.33  |

|           |           |           |           |           |           |           |           |           |           |
|-----------|-----------|-----------|-----------|-----------|-----------|-----------|-----------|-----------|-----------|
| LP213.112 |
| 40701.56  | 41117.75  | 33501.26  | 36074.94  | 39394.03  | 51421.8   | 54132.82  | 32509.37  | 60347.5   | 70964.34  |
| 40311.1   | 38322.03  | 33487.29  | 35197.16  | 43914.77  | 52393.06  | 52661.31  | 31855.2   | 60425.91  | 65038.03  |
| 40957.84  | 43214.77  | 33303.49  | 33926.94  | 42436.67  | 49996.93  | 51287.28  | 37814.2   | 63370.39  | 70977.41  |
| 39434.56  | 38649.36  | 34417.35  | 38766.84  | 42713.92  | 51730.37  | 52563.93  | 31002.03  | 67193.54  | 66799.46  |
| 42684.16  | 42201.59  | 30955.6   | 38390.11  | 43836.13  | 49412.87  | 51820.45  | 30847.61  | 60290.43  | 71126.45  |



|           |           |           |           |           |           |           |           |           |           |
|-----------|-----------|-----------|-----------|-----------|-----------|-----------|-----------|-----------|-----------|
| LP213.112 |
| 56115.12  | 41637.54  | 39607.64  | 33273.85  | 41396.17  | 26957.45  | 31069.96  | 54670.87  | 34200.64  | 32877.26  |
| 61282.48  | 38696.56  | 38210.14  | 34515.7   | 44526.41  | 34892.61  | 30281.07  | 57181.62  | 32021.38  | 28581.67  |
| 57565.25  | 39357.73  | 41491.96  | 37195.28  | 43313.38  | 34492.43  | 29860.64  | 54802.41  | 36029.61  | 38295.27  |
| 57543.34  | 39943.34  | 39386.57  | 35116.69  | 42576.95  | 31808.68  | 31106.5   | 55094.58  | 34929     | 33325.23  |
| 61913.29  | 41933.15  | 40770.45  | 40026.12  | 44226.7   | 33269.59  | 30779.94  | 60523.96  | 36287.79  | 38644.58  |

|           |           |           |           |           |           |           |           |           |           |
|-----------|-----------|-----------|-----------|-----------|-----------|-----------|-----------|-----------|-----------|
| LP213.113 | LP213.112 | LP213.112 | LP213.112 | LP213.148 | LP213.148 | LP213.148 | LP213.148 | LP213.148 | LP213.148 |
| 49375.6   | 58108.9   | 35536.99  | 45414.66  | 64682.75  | 37959     | 47133.82  | 42550.1   | 32393.2   | 43096.9   |
| 46655.31  | 57741.88  | 38818.52  | 42161.98  | 67281.39  | 37968.05  | 47089.16  | 49434.29  | 32326.85  | 43327.76  |
| 50757.57  | 58764.69  | 37524.26  | 38590.4   | 59345.37  | 31246.4   | 50620.32  | 44622.77  | 35413.82  | 41088.92  |
| 43803.43  | 53526.1   | 36895.35  | 42967.62  | 68810.75  | 36304.19  | 49922.79  | 43664.5   | 33367.76  | 43705.4   |
| 47982.19  | 58602.44  | 41115.91  | 44705.49  | 69135.38  | 37488.32  | 51959.44  | 50111.79  | 34924.43  | 45064.81  |

|           |           |           |           |           |           |           |           |           |           |
|-----------|-----------|-----------|-----------|-----------|-----------|-----------|-----------|-----------|-----------|
| LP213.148 |
| 52357.78  | 51414.74  | 67284.73  | 64150.79  | 79765.5   | 41910.4   | 50452.56  | 41291.29  | 49250.18  | 43266.14  |
| 48585.82  | 54241.3   | 68470.32  | 64403.62  | 80798.5   | 46305.96  | 50530.31  | 45192.38  | 51703.11  | 47509.48  |
| 50676.45  | 50342.16  | 67692.96  | 58835.39  | 84262.84  | 46207.51  | 41897.33  | 43224.3   | 52419.8   | 45581.77  |
| 52352.79  | 48471.64  | 68517.71  | 66895.68  | 79966.64  | 43771.6   | 47023.91  | 44668.07  | 53130.25  | 45189.75  |
| 51573.52  | 52810.64  | 69646.96  | 67965.96  | 84497.95  | 50925.64  | 46944.02  | 42578.3   | 53073.85  | 46381.63  |

|           |           |           |           |           |           |           |           |           |           |
|-----------|-----------|-----------|-----------|-----------|-----------|-----------|-----------|-----------|-----------|
| LP213.148 |
| 32759.32  | 51190     | 54366.55  | 47490.59  | 40155.44  | 69330.08  | 41811.81  | 56789.06  | 39476.99  | 77006.2   |
| 37530.26  | 49834.67  | 52005.35  | 44343.74  | 39417.13  | 72009.12  | 44911.22  | 57506.98  | 42832.09  | 75888.2   |
| 32120.57  | 54996.01  | 55788.95  | 47811.74  | 37338.98  | 72706.32  | 42921.08  | 55879.92  | 45303.95  | 82038.73  |
| 34959.17  | 60060.91  | 52783.2   | 45036.72  | 38169.88  | 72349.8   | 40227.45  | 56032.97  | 41333.25  | 74332.25  |
| 35320.52  | 62384.63  | 58589.61  | 49590.92  | 39484.9   | 75391.57  | 45381.8   | 59828.3   | 42878.06  | 80827.17  |

|           |           |           |           |           |           |           |           |           |           |
|-----------|-----------|-----------|-----------|-----------|-----------|-----------|-----------|-----------|-----------|
| LP213.148 | LP213.148 | LP213.148 | LP213.148 | LP213.149 | LP213.149 | LP213.148 | LP213.148 | LP213.148 | LP213.160 |
| 99793.33  | 50346.53  | 38435.62  | 42876.23  | 76433.19  | 51244.67  | 40493.3   | 44942.82  | 50785.16  | 78818.43  |
| 91299.89  | 47745.74  | 38766.4   | 45016.31  | 85366.91  | 51677.67  | 40191.68  | 48882.51  | 51243.46  | 113483.2  |
| 97932.52  | 49151.3   | 40712.15  | 46405.41  | 81430.85  | 53031.77  | 41736.84  | 49733.86  | 50923.74  | 126577.2  |
| 103517.2  | 50890.52  | 38568.18  | 44696.79  | 57935.23  | 32236.52  | 40291     | 46682.03  | 53119.01  | 98890.75  |
| 106372    | 49644.35  | 40466.26  | 53876.04  | 92082.76  | 58974.16  | 45588.31  | 48132.52  | 51297.77  | 114638.6  |

|           |           |           |           |           |           |           |           |           |           |
|-----------|-----------|-----------|-----------|-----------|-----------|-----------|-----------|-----------|-----------|
| LP213.160 |
| 118474.7  | 67306.49  | 93875.55  | 98970.56  | 111799.8  | 108637    | 80114.73  | 85999.71  | 111845.7  | 89248.1   |
| 73005.26  | 67679.53  | 135006.7  | 93179.59  | 134980.6  | 88763.57  | 92624.64  | 79325.28  | 95182.52  | 106102.5  |
| 97687.25  | 111361.1  | 124877.7  | 113157.7  | 73922.15  | 115506.2  | 121409.7  | 112647.9  | 91908.15  | 108511.8  |
| 120620.9  | 92007.92  | 92564.18  | 148064.7  | 98883.77  | 116324.4  | 109675    | 77981.16  | 112702.9  | 143858.2  |
| 134817    | 86569.9   | 154104.2  | 90899.01  | 102489.6  | 128002.5  | 109156.5  | 136896.7  | 113926    | 126221.3  |

|           |           |           |           |           |           |           |           |           |           |
|-----------|-----------|-----------|-----------|-----------|-----------|-----------|-----------|-----------|-----------|
| LP213.160 |
| 86570.45  | 90999.55  | 80751.46  | 91095.58  | 124240.2  | 108955.2  | 93992.23  | 107628.1  | 90533.42  | 83681.03  |
| 83570.64  | 68391.58  | 118901.8  | 91469.72  | 85075.83  | 89658.29  | 90630.42  | 147425.2  | 68828.27  | 89873.4   |
| 88540.44  | 74023.06  | 124068.5  | 77396.98  | 106092    | 82503.59  | 161142.2  | 69218.7   | 74870.3   | 89930.62  |
| 124445.2  | 98748.04  | 100545.1  | 114572.1  | 103519.3  | 85005.65  | 126219.4  | 124719.3  | 71398.55  | 104107    |
| 96736.52  | 90095.65  | 70111.27  | 120126.3  | 77816.25  | 134509.7  | 97451.67  | 90975.64  | 86356.74  | 107684.2  |

|           |           |           |           |           |           |           |           |           |           |
|-----------|-----------|-----------|-----------|-----------|-----------|-----------|-----------|-----------|-----------|
| LP213.160 | LP213.159 | LP213.160 |
| 101624.4  | 136892    | 79646.86  | 73073.07  | 121879    | 86758.38  | 113858.7  | 76274.44  | 106957.1  | 84053.9   |
| 121205.2  | 83279.7   | 93926.99  | 74329.15  | 102252.3  | 91346.58  | 82560.2   | 80010.82  | 88124.32  | 59511     |
| 79498.65  | 102862    | 91056.24  | 70001.29  | 91648.75  | 88474.51  | 91568.73  | 76462.3   | 85049.69  | 69666.79  |
| 79051.03  | 110634.9  | 74487.06  | 114548.5  | 91404.69  | 110522.1  | 104492    | 109545.6  | 75242.36  | 67377.63  |
| 154273.6  | 115497.8  | 112114.4  | 101764.4  | 156396.1  | 110094.6  | 104437    | 84565.73  | 100447.9  | 77853.59  |



|           |           |           |           |           |           |           |           |           |           |
|-----------|-----------|-----------|-----------|-----------|-----------|-----------|-----------|-----------|-----------|
| LP213.160 | LP213.161 | LP213.160 | LP213.160 | LP213.160 | LP213.160 | LP213.185 | LP213.185 | LP213.185 | LP214.143 |
| 90979.19  | 80947.93  | 79524.48  | 55967.44  | 57172.28  | 91738.35  | 63956.12  | 75497.57  | 102310.9  | 423021.4  |
| 90176.53  | 68746.65  | 78064.31  | 50795.1   | 72554.71  | 97738.46  | 71736.42  | 85498.51  | 99121.69  | 396066.7  |
| 96387.05  | 74692.76  | 71175.78  | 47779.83  | 68399.17  | 92135.59  | 65062.17  | 77495.41  | 103205.9  | 426541.7  |
| 108128.9  | 88725.17  | 104785.8  | 51166.53  | 74932.04  | 93949.07  | 75685.17  | 85417.54  | 101670.2  | 397343.3  |
| 108425.9  | 90222.19  | 85875.16  | 55037.95  | 78424.8   | 107050.7  | 85786.71  | 88308.55  | 124433.2  | 476766.9  |

|           |           |           |           |           |           |           |           |           |           |
|-----------|-----------|-----------|-----------|-----------|-----------|-----------|-----------|-----------|-----------|
| LP214.144 | LP215.092 | LP215.093 |
| 298219.6  | 92860.96  | 36937.73  | 87984.22  | 55527.83  | 40745.04  | 65897.94  | 103346.9  | 71490.6   | 44023.54  |
| 320637.5  | 89793.89  | 36830.41  | 88765.65  | 66469.25  | 48858.8   | 64727.87  | 97277.92  | 70878.71  | 43688.32  |
| 317546.2  | 53309.06  | 38313.8   | 92215.28  | 69056.15  | 28496.58  | 64493.06  | 53669.43  | 69926.67  | 47032.11  |
| 323854    | 92421.47  | 41277.79  | 84966.26  | 68549.9   | 44749.94  | 66241.68  | 108015.2  | 72114.96  | 41828.8   |
| 394153.6  | 106426.9  | 39016.98  | 101611.4  | 70326.54  | 53985.87  | 71751.06  | 100612.6  | 84058.31  | 42537.12  |

|           |           |           |           |           |           |           |           |           |           |
|-----------|-----------|-----------|-----------|-----------|-----------|-----------|-----------|-----------|-----------|
| LP215.093 |
| 54875.2   | 54925.05  | 50747.91  | 56469.76  | 38617.3   | 46084.84  | 40251.76  | 57295.03  | 35348.6   | 31945.75  |
| 54885.75  | 50956.55  | 46103.77  | 53335.11  | 42385.34  | 44507.32  | 41378.03  | 58501.51  | 34806.25  | 31189.17  |
| 52412.9   | 54206.23  | 43133.73  | 49986.3   | 41387.67  | 44195.43  | 39835.34  | 54171.12  | 35207.39  | 32023.63  |
| 50510.75  | 52809.05  | 45826.93  | 51433.19  | 39582.81  | 47819.69  | 39298.83  | 54339.56  | 35287.57  | 31933.18  |
| 61525.29  | 64835.72  | 57269.47  | 64907.3   | 47295.18  | 45810.26  | 45696.75  | 63097.58  | 42787.27  | 34255.08  |

|           |           |           |           |           |           |           |           |           |           |
|-----------|-----------|-----------|-----------|-----------|-----------|-----------|-----------|-----------|-----------|
| LP215.093 |
| 46470.89  | 67584.23  | 54003.04  | 46783.53  | 75450     | 55139.12  | 74011.14  | 43234.17  | 51665.06  | 35087.58  |
| 52431.21  | 69400.75  | 48132.22  | 49291.52  | 77254.3   | 61236.09  | 71526.57  | 40410.86  | 47374.63  | 36427.95  |
| 49768.74  | 31873.26  | 52139.55  | 45341.22  | 75317.55  | 52987.03  | 72859.76  | 43797.29  | 32680.99  | 33945.75  |
| 48925.26  | 70441.4   | 55580.26  | 42570.69  | 70828.46  | 63246.21  | 70297.58  | 41628.88  | 51108.66  | 33010.8   |
| 52825.65  | 74369.92  | 56620.84  | 52761.89  | 81759.83  | 72569.39  | 72953.6   | 45214.85  | 57123.55  | 38151.45  |

|           |           |           |           |           |           |           |           |           |           |
|-----------|-----------|-----------|-----------|-----------|-----------|-----------|-----------|-----------|-----------|
| LP215.093 |
| 71860.16  | 51378     | 56402.02  | 49602.84  | 36078.8   | 48854.73  | 41937.65  | 43465.58  | 37411.15  | 81621.62  |
| 73322.93  | 43675.1   | 58747.06  | 57607.73  | 37488.36  | 50310.37  | 47969.32  | 40884.38  | 36987.42  | 80380.01  |
| 78157.82  | 45621.26  | 54050.18  | 49801.44  | 36903.02  | 48606.69  | 43970.51  | 44139.94  | 36582.92  | 75910.25  |
| 73219.37  | 43968.15  | 54128.18  | 48070.79  | 37921.48  | 52341.38  | 44497.09  | 44695.21  | 35578.44  | 79759.8   |
| 79978.32  | 48989.19  | 60633.1   | 55418.43  | 41350.73  | 49905.85  | 48681.81  | 41630.2   | 39779.15  | 88162.44  |

|           |           |           |           |           |           |           |           |           |           |
|-----------|-----------|-----------|-----------|-----------|-----------|-----------|-----------|-----------|-----------|
| LP215.092 | LP215.093 |
| 60438.13  | 63244.44  | 59856.37  | 39513.8   | 39575.45  | 37853.62  | 56859.91  | 37920.33  | 28754.2   | 63048.6   |
| 63796.65  | 66184.01  | 56144.56  | 41505.01  | 38875.46  | 37220.57  | 61678.43  | 40905.89  | 28611.47  | 66426     |
| 40887.02  | 63154.95  | 53204.32  | 41467.95  | 33996.96  | 39911.23  | 56133.54  | 41047.29  | 25066.03  | 31003.8   |
| 65377.17  | 63155.91  | 52273.24  | 37464.1   | 35299.93  | 32665.78  | 56989.86  | 45372.54  | 28204.41  | 67775.47  |
| 75314.74  | 77193.71  | 59203.51  | 41181.91  | 43999.41  | 37839.8   | 65977.37  | 49708.8   | 30788.93  | 67990.36  |

|           |           |           |           |           |           |           |           |           |           |
|-----------|-----------|-----------|-----------|-----------|-----------|-----------|-----------|-----------|-----------|
| LP215.093 | LP215.093 | LP215.093 | LP215.092 | LP215.093 | LP215.092 | LP215.093 | LP215.093 | LP215.093 | LP215.093 |
| 46417.99  | 55909.51  | 82004.28  | 47642.48  | 42180.91  | 106528.4  | 58960.28  | 62747.03  | 56472.43  | 70789.74  |
| 47868.99  | 51050.01  | 87452.01  | 48635.84  | 41778.49  | 100726.4  | 55739.28  | 60508.03  | 58083     | 68942.92  |
| 50100.87  | 57888.78  | 51583.14  | 46395.38  | 37819.09  | 54014.24  | 57687.85  | 34146.11  | 50456.22  | 66512.04  |
| 45886.21  | 55070.02  | 86883.18  | 52216.25  | 42688.28  | 100198.9  | 64289.47  | 66349.3   | 54648.01  | 72083.45  |
| 50133.51  | 62357.81  | 88054.15  | 55121.39  | 42194.58  | 104901.7  | 68181.96  | 74136.63  | 62930.87  | 79144.23  |

|           |           |           |           |           |           |           |           |           |           |
|-----------|-----------|-----------|-----------|-----------|-----------|-----------|-----------|-----------|-----------|
| LP215.093 | LP215.093 | LP215.092 | LP215.093 | LP215.093 | LP215.092 | LP215.093 | LP215.092 | LP215.093 | LP215.093 |
| 75779.31  | 62507.58  | 64986.98  | 64296.8   | 54216.66  | 73356.83  | 58692.49  | 70250.03  | 31978.18  | 73581.36  |
| 76183.06  | 57469.36  | 70321.18  | 59833.49  | 57556.6   | 67469.88  | 64718.21  | 72564.32  | 36995.96  | 67247.68  |
| 50279.56  | 62727.72  | 62069.5   | 34710.68  | 57370.47  | 68350.75  | 64654.53  | 73004.79  | 32781.19  | 37466.88  |
| 86470.46  | 58192.02  | 60647.32  | 65606.25  | 57294.5   | 66990.26  | 56931.8   | 75976.62  | 32433.56  | 69296.05  |
| 85297.06  | 68584.8   | 78013.61  | 72133.34  | 60855.77  | 80252.08  | 67578.8   | 80895.2   | 37320.98  | 77883.39  |



|           |           |           |           |           |           |           |           |           |           |
|-----------|-----------|-----------|-----------|-----------|-----------|-----------|-----------|-----------|-----------|
| LP215.093 | LP215.093 | LP215.093 | LP215.093 | LP215.092 | LP215.093 | LP215.093 | LP215.093 | LP215.093 | LP215.093 |
| 88659.07  | 55422.42  | 51555.32  | 47679.14  | 49328.91  | 69811.82  | 48509.07  | 48443.79  | 66155.81  | 79882.27  |
| 80107.95  | 54902.18  | 50250.55  | 47493.07  | 41283.66  | 69228.88  | 50177.95  | 49911.48  | 67451.61  | 85195.02  |
| 41659.79  | 50203.97  | 53849.8   | 48138.69  | 48795.64  | 45731.27  | 42917.38  | 53208.42  | 66230.36  | 37655.5   |
| 82816.74  | 54520.6   | 50079.22  | 51470.21  | 49777.23  | 71811.94  | 52175.26  | 53801.06  | 61337.49  | 81879.47  |
| 91389.7   | 49083.67  | 52307.94  | 47232.21  | 54536.84  | 81563.16  | 56026.06  | 62107.05  | 69325.26  | 95723.3   |

|           |           |           |           |           |           |           |           |           |           |
|-----------|-----------|-----------|-----------|-----------|-----------|-----------|-----------|-----------|-----------|
| LP215.093 | LP215.093 | LP215.093 | LP215.127 | LP215.127 | LP215.127 | LP215.127 | LP215.127 | LP215.127 | LP215.128 |
| 72400.33  | 77522.56  | 62077.78  | 52960.25  | 59803.48  | 35097.6   | 57293.06  | 60651.2   | 47319.39  | 86827.29  |
| 76218.39  | 72236.82  | 59456.65  | 66827.89  | 57589.4   | 32236.21  | 50158.49  | 63096.97  | 48430.04  | 83126.62  |
| 34246.09  | 72042.38  | 58734.15  | 100717.9  | 73622.51  | 34897.67  | 53932.73  | 63824.15  | 49100.22  | 99109.03  |
| 72435.75  | 66943.97  | 60907.09  | 54208.47  | 57295.63  | 36414.28  | 61153.47  | 63702.86  | 42065.08  | 93022.02  |
| 91572.6   | 89766.47  | 72044.17  | 77652.08  | 69184.83  | 43224.89  | 59598.87  | 74352.29  | 57482.87  | 66023.37  |

|           |           |           |           |           |           |           |           |           |           |
|-----------|-----------|-----------|-----------|-----------|-----------|-----------|-----------|-----------|-----------|
| LP215.127 | LP215.127 | LP215.127 | LP215.128 | LP215.127 | LP215.127 | LP215.127 | LP215.127 | LP215.128 | LP215.128 |
| 84218.97  | 89707.41  | 89911.73  | 89990.86  | 91471.51  | 46882.33  | 66656.27  | 84694.63  | 83440.76  | 70099.38  |
| 71642.28  | 102490.1  | 97232.03  | 104084.6  | 73692.93  | 75682.65  | 68478.82  | 73918.09  | 106657.6  | 68645.62  |
| 75647.65  | 76733.83  | 88215.74  | 76463.81  | 77463.64  | 72880.77  | 62938.25  | 81283.84  | 83078.82  | 62768.07  |
| 83059.36  | 141679.6  | 94823     | 86066.69  | 98121.65  | 58217.91  | 82585.52  | 76786.14  | 99846.25  | 90848.61  |
| 110801.7  | 124734.5  | 81624.7   | 123525.6  | 76644.7   | 66653.87  | 70762.69  | 141607.4  | 82986.09  | 97784.36  |

|            |            |            |            |            |            |            |            |            |            |
|------------|------------|------------|------------|------------|------------|------------|------------|------------|------------|
| LP215.127' | LP215.128' | LP215.127' |
| 56771.36   | 74303.03   | 72966.18   | 73355.86   | 67722      | 79321.26   | 85748.34   | 65929.32   | 73525.59   | 62300.05   |
| 84791.51   | 63094.79   | 72968.34   | 60977.7    | 70260.29   | 67607.09   | 117038.8   | 57612.56   | 50779.92   | 67317.96   |
| 69659.01   | 90862.76   | 63053.48   | 79662.78   | 67463.01   | 89418.64   | 92160.24   | 62939.84   | 74538.8    | 65373.66   |
| 79170.67   | 83442.05   | 96504.45   | 72657.06   | 66289.84   | 87602.36   | 66926.77   | 85268.19   | 74706.38   | 79992.26   |
| 93565.46   | 74733.09   | 69659.23   | 81859.51   | 67789.51   | 86498.6    | 81556.42   | 57628.44   | 77672.56   | 75034.46   |

|           |           |           |           |           |           |           |           |           |           |
|-----------|-----------|-----------|-----------|-----------|-----------|-----------|-----------|-----------|-----------|
| LP215.127 | LP215.127 | LP215.127 | LP215.127 | LP215.127 | LP215.128 | LP215.127 | LP215.127 | LP215.128 | LP215.128 |
| 79541.86  | 69917.34  | 57113.51  | 87218.54  | 63290.56  | 75669.44  | 58688.4   | 72161.21  | 66425.26  | 62718.2   |
| 70895.21  | 92596.84  | 71728.93  | 64275.19  | 60847.79  | 88443.73  | 61881.3   | 73604.12  | 69721.19  | 46935.44  |
| 95185.33  | 68951.92  | 65654.3   | 83247.24  | 61477.95  | 78406.23  | 67360.85  | 72852.08  | 61274.66  | 56516.35  |
| 71127.17  | 83447.62  | 86482.36  | 59130.24  | 65288.16  | 85184.87  | 61787.46  | 77722.46  | 61203.79  | 59859.72  |
| 81275.76  | 77860.66  | 49795.47  | 123325.3  | 66315.99  | 82785.65  | 72644.31  | 87081.42  | 76382.76  | 67144.24  |

|           |           |           |           |           |           |           |           |           |           |
|-----------|-----------|-----------|-----------|-----------|-----------|-----------|-----------|-----------|-----------|
| LP215.127 | LP215.127 | LP215.128 | LP215.128 | LP215.128 | LP215.127 | LP215.127 | LP215.128 | LP215.127 | LP215.127 |
| 62503.65  | 74010.65  | 55128.94  | 55284.76  | 56176     | 48840.27  | 58250.58  | 42851.43  | 52710.96  | 45755.15  |
| 66671.93  | 55201.63  | 57595.96  | 50499.52  | 55320.23  | 42547.99  | 60809.42  | 45278.9   | 56457.19  | 53796.15  |
| 60882.08  | 74046.65  | 56975.47  | 56721.63  | 51336.54  | 59076.15  | 60333.28  | 57479.59  | 53543.05  | 45691.29  |
| 68276.36  | 70208.96  | 65582.58  | 69708.01  | 56823.78  | 57804.03  | 56554.18  | 42811.37  | 54059.81  | 47646.62  |
| 78943.4   | 80156.14  | 64837.35  | 61913.28  | 65482.41  | 64361.03  | 66270.73  | 45490.27  | 60268.9   | 50724.09  |

|           |           |           |           |           |           |           |           |           |           |
|-----------|-----------|-----------|-----------|-----------|-----------|-----------|-----------|-----------|-----------|
| LP215.128 | LP215.127 | LP215.128 | LP215.128 | LP215.128 | LP215.127 | LP215.127 | LP215.128 | LP215.127 | LP215.128 |
| 38170.49  | 37447.71  | 41658.51  | 37019.5   | 59200.36  | 59945.86  | 79564.06  | 81540.67  | 51019.02  | 58495.47  |
| 33065.57  | 44017.01  | 46600.96  | 35979.88  | 65359.19  | 57826.75  | 77730.67  | 75215.52  | 55063.76  | 62663.86  |
| 36498.53  | 36660.99  | 44356.92  | 40011.02  | 88490.1   | 62777.5   | 82523.7   | 79806.18  | 57483.13  | 62632.4   |
| 39106.65  | 39815.4   | 53270.6   | 36685.83  | 58710.04  | 62909.91  | 84041.95  | 78193.09  | 54018.85  | 64943.63  |
| 44623.39  | 40693.52  | 49568.4   | 38157.07  | 70693.54  | 65203.8   | 87077.36  | 95858.97  | 58974.15  | 69391.55  |

|           |           |           |           |           |           |           |           |           |           |
|-----------|-----------|-----------|-----------|-----------|-----------|-----------|-----------|-----------|-----------|
| LP215.128 | LP215.127 | LP215.128 | LP215.128 | LP215.128 | LP215.164 | LP215.164 | LP215.164 | LP216.085 | LP216.085 |
| 37799.74  | 62917.45  | 45968.25  | 40381.52  | 62260.48  | 23303.14  | 22321.93  | 27216.06  | 20661.46  | 20727.84  |
| 39743.8   | 58034.15  | 54082.19  | 40085.31  | 63443.45  | 28138.53  | 26321.75  | 24241.11  | 17773.62  | 20392.85  |
| 38755.28  | 64595.51  | 57831.63  | 46935.49  | 65295.93  | 24947.39  | 24456.19  | 25949.57  | 19088.94  | 21603.22  |
| 43670.07  | 67617.55  | 52099.13  | 42851.63  | 62931.25  | 22207.08  | 27350.13  | 25588.91  | 19092.86  | 23549.94  |
| 45627.7   | 69321.85  | 54385.89  | 44865.94  | 74066.95  | 25844.42  | 24518.05  | 27759.9   | 22742.68  | 29039.03  |



|            |            |            |            |            |            |            |            |            |            |
|------------|------------|------------|------------|------------|------------|------------|------------|------------|------------|
| LP216.085` | LP216.922` | LP216.923` |
| 22523.94   | 27830.81   | 42508.67   | 62793.77   | 44298.25   | 56747.37   | 71784.48   | 53171.61   | 48950.27   | 57495.86   |
| 19900.41   | 23978.92   | 37897.33   | 54842.04   | 41912.31   | 60139.11   | 76818.66   | 44601.05   | 42152.57   | 52948.63   |
| 22654.23   | 23549.26   | 42967.71   | 56607.04   | 37258.39   | 55365.85   | 73772.51   | 50563.48   | 44536.81   | 50937.51   |
| 19303.67   | 24434.12   | 44358.12   | 53044.48   | 40190.94   | 63674.27   | 73475.61   | 46925.24   | 46799.06   | 56940.19   |
| 25874.97   | 23696.33   | 38939      | 56318.41   | 43279.16   | 59111.1    | 70473.19   | 48917.51   | 44800.17   | 58515.42   |

|           |           |           |           |           |           |           |           |           |           |
|-----------|-----------|-----------|-----------|-----------|-----------|-----------|-----------|-----------|-----------|
| LP217.068 | LP217.068 | LP217.106 | LP217.107 | LP217.107 | LP217.107 | LP217.107 | LP217.107 | LP217.106 | LP217.107 |
| 65331.86  | 72968.28  | 42301.68  | 57447.96  | 66239.49  | 53820.06  | 58768.13  | 48671.14  | 45034.58  | 49402.77  |
| 67608.02  | 77579.14  | 33906.44  | 50317.79  | 56475.93  | 81207.56  | 55809.79  | 41596.75  | 39632.34  | 57116.4   |
| 67043.77  | 78606.6   | 35008.29  | 55528.86  | 57575.13  | 52844.2   | 56795.64  | 41599.52  | 44756.02  | 45873.77  |
| 64702.62  | 76379.57  | 46531.19  | 69856.14  | 67040.54  | 57903.15  | 92209.37  | 62173.2   | 40887.25  | 80200.75  |
| 58941.86  | 87781.26  | 52101.23  | 63816.65  | 106810.1  | 95823.7   | 55118.85  | 51003.11  | 45761.58  | 57202.43  |

|           |           |           |           |           |           |           |           |           |           |
|-----------|-----------|-----------|-----------|-----------|-----------|-----------|-----------|-----------|-----------|
| LP217.107 |
| 42881.46  | 39217.27  | 43602.51  | 50078.93  | 55677.16  | 58582.51  | 35355.23  | 40498.54  | 52663.5   | 52684.66  |
| 55217.08  | 40293.61  | 41438.02  | 60882.58  | 63833.11  | 60134.22  | 27846     | 40648.29  | 51926.57  | 42317.43  |
| 37603.89  | 39934.36  | 46388.47  | 67030.61  | 58878.93  | 54187.07  | 28747.67  | 38997.38  | 48469.55  | 49785.73  |
| 64175.11  | 62961.99  | 45898.34  | 61405.17  | 58187.36  | 56108.24  | 32034.36  | 43656.93  | 49081.58  | 50225.15  |
| 42725.15  | 40090.17  | 39438.5   | 64207.87  | 56206.54  | 63306.91  | 34121.75  | 36849.34  | 48476.93  | 50044.94  |

|           |           |           |           |           |           |           |           |           |           |
|-----------|-----------|-----------|-----------|-----------|-----------|-----------|-----------|-----------|-----------|
| LP217.107 |
| 37094.32  | 39112.18  | 41289.09  | 40042.58  | 34191.48  | 36658.64  | 46706.76  | 36122.69  | 37262.48  | 22055.15  |
| 39017.59  | 41203.58  | 39440.34  | 47619.24  | 39054.4   | 34474.66  | 48468.73  | 34588.54  | 37860.62  | 22583.34  |
| 36961.16  | 45588.58  | 41092.28  | 38885.83  | 37349.93  | 38600.58  | 51086.88  | 36679.63  | 37458.04  | 24031.99  |
| 36588.74  | 40019.24  | 38380.53  | 39839.8   | 36922.88  | 38214.04  | 44559.85  | 37526.84  | 38192.89  | 22361.9   |
| 32214.78  | 46996.38  | 35378.04  | 42521.61  | 35976.38  | 36171.77  | 49446.95  | 38154.81  | 39739.3   | 21176.85  |

|           |           |           |           |           |           |           |           |           |           |
|-----------|-----------|-----------|-----------|-----------|-----------|-----------|-----------|-----------|-----------|
| LP217.107 | LP217.107 | LP217.107 | LP217.106 | LP217.107 | LP217.107 | LP217.107 | LP217.107 | LP217.107 | LP217.107 |
| 29985.72  | 29167.17  | 58675.03  | 41532.57  | 23288.48  | 61985.56  | 87382.82  | 54398.65  | 51143.12  | 65352.07  |
| 32740.96  | 31336.32  | 52200.9   | 37213.17  | 22238.42  | 91453.06  | 90624.31  | 51584.32  | 44054.12  | 82555.56  |
| 34378.39  | 30457.31  | 53108.64  | 42366.15  | 23917.84  | 63653.21  | 76106.08  | 56879.83  | 42102.92  | 63360.31  |
| 33007.29  | 31008.09  | 53892.43  | 39417.06  | 24880.13  | 59380.46  | 68352.33  | 71593.38  | 43441.89  | 85758.98  |
| 35068.31  | 27314.13  | 49964.75  | 35977.81  | 23135.04  | 66461.02  | 62956.55  | 70244.42  | 51832.25  | 60789.54  |

|           |           |           |           |           |           |           |           |           |           |
|-----------|-----------|-----------|-----------|-----------|-----------|-----------|-----------|-----------|-----------|
| LP217.107 |
| 49488.03  | 60510.52  | 40503.84  | 50821.8   | 50367.93  | 50296.89  | 48572.77  | 38715.37  | 55994.56  | 52376.35  |
| 47801.88  | 59119.33  | 43400.69  | 49559.98  | 59644.45  | 46147.71  | 53423.06  | 86817.07  | 67949.2   | 49380.9   |
| 49656.01  | 60009.31  | 37463.17  | 50866.28  | 50570.01  | 45705.43  | 54182.59  | 35820.36  | 57517.86  | 71743.1   |
| 57492.59  | 63729.31  | 40665.6   | 51411.57  | 52415.83  | 54841.3   | 49865.63  | 43706.28  | 55075     | 46294.68  |
| 54425.27  | 61883.05  | 44912.52  | 50339.62  | 51189.55  | 47433.47  | 57006.24  | 37290.01  | 64570.69  | 48494.52  |

|           |           |           |           |           |           |           |           |           |           |
|-----------|-----------|-----------|-----------|-----------|-----------|-----------|-----------|-----------|-----------|
| LP217.107 | LP217.107 | LP217.107 | LP217.107 | LP217.107 | LP217.107 | LP217.108 | LP217.107 | LP217.108 | LP217.108 |
| 51457.22  | 48032.07  | 56655.51  | 35658.65  | 26549.66  | 35982.1   | 66918.56  | 54408.17  | 44435.57  | 37157.79  |
| 55186.67  | 47203.32  | 69232.1   | 32408.61  | 33938.25  | 37408.46  | 72085.79  | 52019.04  | 40555.67  | 32798.58  |
| 62023.28  | 56820.05  | 55322.81  | 30793.4   | 33281.94  | 37326.66  | 69420.65  | 54485.16  | 41824.35  | 34095.78  |
| 48005.18  | 62652     | 57340.18  | 34270.49  | 32876.62  | 37464.17  | 68548.75  | 55305     | 40819.04  | 39932.83  |
| 63552.31  | 51282.33  | 56082.15  | 43798.53  | 30425.77  | 39196.84  | 79595.4   | 54822.71  | 41372.2   | 31262.2   |

|           |           |           |           |           |           |           |           |           |           |
|-----------|-----------|-----------|-----------|-----------|-----------|-----------|-----------|-----------|-----------|
| LP217.122 |
| 57133.09  | 42078.08  | 66286.99  | 36226.93  | 52809.67  | 41414.7   | 46543.28  | 48478.84  | 57632.77  | 68410     |
| 54151.11  | 37324.42  | 63888.69  | 38571.14  | 50595.99  | 39859.06  | 45282.61  | 44536.53  | 56223.94  | 70705.01  |
| 56941.4   | 41707.21  | 67386.18  | 42437.51  | 54686.18  | 38880.19  | 49331.76  | 44465.08  | 57897.61  | 84524.97  |
| 64074.83  | 47468.2   | 65656.95  | 44029.19  | 53505.4   | 44119.21  | 56165.1   | 49934.93  | 59724.78  | 75966.83  |
| 44983.27  | 43502.44  | 75873.08  | 38205.15  | 47919.93  | 45477.16  | 53503.46  | 45449.86  | 61483.88  | 83061.62  |



|           |           |           |           |           |           |           |           |           |           |
|-----------|-----------|-----------|-----------|-----------|-----------|-----------|-----------|-----------|-----------|
| LP217.122 | LP217.122 | LP217.122 | LP217.122 | LP217.160 | LP217.160 | LP217.160 | LP217.160 | LP217.160 | LP217.160 |
| 67727.41  | 41329.85  | 51622.84  | 64107.77  | 35051.35  | 29344.64  | 37100.71  | 32006.3   | 24487.13  | 36785.92  |
| 67287.11  | 41812.53  | 50510.76  | 65459     | 49270.87  | 48413.03  | 48612.97  | 41835     | 38916.87  | 54470.3   |
| 68527.29  | 47388.69  | 57648.65  | 73869.36  | 45093.52  | 43906.36  | 55392.74  | 51103.08  | 39321.29  | 43641.17  |
| 69705.72  | 47176.84  | 56761.67  | 75429.13  | 41702.34  | 32761.71  | 35458.07  | 28018.38  | 26064.61  | 35528.62  |
| 69685.7   | 43171.24  | 52858.15  | 72593.97  | 53102.57  | 40256.8   | 45399.97  | 41809.27  | 34369.39  | 55432.68  |

|           |           |           |           |           |           |           |           |           |           |
|-----------|-----------|-----------|-----------|-----------|-----------|-----------|-----------|-----------|-----------|
| LP217.160 | LP217.161 | LP217.160 | LP217.160 | LP217.161 | LP217.160 | LP217.160 | LP217.161 | LP217.160 | LP217.160 |
| 40163.01  | 33220.23  | 34391.35  | 30425.61  | 35131.07  | 30634.68  | 49532.69  | 30514.17  | 41347.58  | 45740.48  |
| 48885.59  | 51956.05  | 41819.41  | 50895.01  | 46695.11  | 30585.38  | 39587.01  | 31858.2   | 38150.03  | 47137.28  |
| 66846.2   | 41023.96  | 41667.39  | 35200.57  | 37273.4   | 32291.87  | 62820.02  | 46934.76  | 55038.25  | 58025.16  |
| 41540.16  | 36539.86  | 32621.51  | 28651.05  | 37996.87  | 30716.63  | 45212.97  | 37449.47  | 39805.67  | 47024.48  |
| 56563.14  | 40394.25  | 43258.49  | 40086.17  | 51261.28  | 40615.45  | 62587.34  | 48373.34  | 55414.16  | 63530.65  |

|           |           |           |           |           |           |           |           |           |           |
|-----------|-----------|-----------|-----------|-----------|-----------|-----------|-----------|-----------|-----------|
| LP218.139 | LP218.139 | LP218.139 | LP218.139 | LP218.139 | LP218.139 | LP218.138 | LP218.139 | LP218.139 | LP218.139 |
| 19136.22  | 19761.41  | 19409.02  | 17411.97  | 18336.86  | 30606.32  | 23008.5   | 22054.69  | 26166.21  | 22581.37  |
| 18145.92  | 21496.94  | 20427.74  | 19027.08  | 19691.37  | 29728     | 23455.03  | 22117.37  | 27925.14  | 23391.5   |
| 16491.14  | 20098.43  | 23172.59  | 21612.81  | 20704.37  | 33366.63  | 21962.6   | 24404.59  | 23831.28  | 27644.18  |
| 19004.69  | 19797.96  | 22528.42  | 20999.69  | 16747.54  | 33938.38  | 24876.71  | 21318.4   | 28811.11  | 27937.46  |
| 18982.86  | 20328.25  | 21893.92  | 19796.65  | 16138.18  | 34580.37  | 22102.21  | 22576.06  | 29056.24  | 23839.52  |

|           |           |           |           |           |           |           |           |           |           |
|-----------|-----------|-----------|-----------|-----------|-----------|-----------|-----------|-----------|-----------|
| LP219.137 |
| 60020.77  | 48331.85  | 41406.14  | 43494.11  | 49753.47  | 34916.73  | 38972.8   | 31998.38  | 38009.98  | 34614.07  |
| 58275.36  | 48747.5   | 36429.62  | 44068.28  | 43144.4   | 32894.31  | 40299.91  | 38344.67  | 35450.76  | 37941.98  |
| 58333.3   | 49679.1   | 34126.47  | 46892.68  | 49265.1   | 34426.41  | 36172.46  | 33934.44  | 36143.24  | 41790.61  |
| 60402.19  | 39813.5   | 36929.18  | 48543.61  | 44825.53  | 35137.69  | 32421.39  | 35926.18  | 35590.3   | 32523.67  |
| 55175.62  | 43215.16  | 38061.1   | 44023.3   | 48134.85  | 35181.69  | 36628.1   | 36712.34  | 35692.8   | 35231.28  |

|           |           |           |           |           |           |           |           |           |           |
|-----------|-----------|-----------|-----------|-----------|-----------|-----------|-----------|-----------|-----------|
| LP219.137 | LP219.138 |
| 44211.8   | 54723.5   | 62618.86  | 53784.23  | 48260.81  | 47849.22  | 46594.73  | 42372.74  | 44037.06  | 53608.71  |
| 54929.38  | 53529.84  | 66779.68  | 53015.66  | 37800.23  | 48825.33  | 55413.15  | 42918.66  | 44387.37  | 44084.89  |
| 49917.3   | 62844.84  | 63825.22  | 55438.22  | 46194.65  | 46856.04  | 47486.02  | 47015.24  | 43432.78  | 48106.36  |
| 45273.37  | 53005.74  | 70843.91  | 70780.34  | 58479.36  | 45516.29  | 48770.48  | 43160.25  | 41616.8   | 40430.99  |
| 45628.66  | 81625.43  | 84486.48  | 47553.45  | 42347.44  | 53496.37  | 58051.87  | 38874.27  | 58359.17  | 48045.3   |

|            |           |           |            |           |           |            |           |            |            |
|------------|-----------|-----------|------------|-----------|-----------|------------|-----------|------------|------------|
| LP219.137! | LP219.138 | LP219.138 | LP219.137! | LP219.138 | LP219.138 | LP219.137! | LP219.138 | LP219.137! | LP219.137! |
| 54867.07   | 49257.13  | 46341.18  | 40063.44   | 39510.14  | 51289.65  | 34986      | 28434.07  | 61840.89   | 43969.96   |
| 54616.38   | 44804.81  | 44938.43  | 40954.27   | 38668.5   | 49612.48  | 33217.24   | 32797.36  | 54637.42   | 41953.53   |
| 56331.1    | 42851.44  | 44616.37  | 40878.83   | 46178.48  | 48213.4   | 34435.38   | 30902.35  | 58989.97   | 47039.15   |
| 52880.95   | 42666.95  | 44243.04  | 38715.05   | 43110.44  | 50158.74  | 31802.27   | 30427.67  | 62171.6    | 42312.22   |
| 65198.35   | 47162.25  | 53207.3   | 38004.1    | 41538.36  | 45235.21  | 35806.92   | 33761.35  | 63455.09   | 47001.14   |

|           |           |           |           |           |           |           |           |           |           |
|-----------|-----------|-----------|-----------|-----------|-----------|-----------|-----------|-----------|-----------|
| LP219.138 | LP219.138 | LP219.138 | LP219.137 | LP219.138 | LP219.137 | LP219.138 | LP219.138 | LP219.138 | LP219.137 |
| 42885.18  | 49257.11  | 35325.85  | 33196.53  | 40376.18  | 40122.75  | 27176.07  | 35254.62  | 48333.87  | 64480.99  |
| 41808.09  | 47536.85  | 32353.2   | 35722.5   | 35057.53  | 44678.06  | 22167.25  | 32137.38  | 56175.15  | 56826.63  |
| 37974.01  | 45944.64  | 35182.18  | 34697.05  | 29707.84  | 40173.55  | 25261.67  | 34304.9   | 61720.33  | 64959.29  |
| 33362.95  | 50041.08  | 38894.34  | 35249.93  | 36606.63  | 50525.81  | 26946.57  | 35688.11  | 53709.41  | 62895.66  |
| 40080.56  | 53393.75  | 36565.29  | 29437.94  | 33462.37  | 45384.19  | 28530.77  | 35156.21  | 55430.16  | 66995.37  |

|           |           |           |           |           |           |           |           |           |           |
|-----------|-----------|-----------|-----------|-----------|-----------|-----------|-----------|-----------|-----------|
| LP219.138 |
| 43519.78  | 44745.06  | 28115.74  | 45646.59  | 35895.53  | 54910.41  | 41605.73  | 40265.78  | 34594.25  | 26240.87  |
| 45393.79  | 46362.36  | 26283.65  | 48914.31  | 41755.37  | 51267.48  | 44340.9   | 37677.08  | 33640.29  | 25604.69  |
| 42661     | 40448.52  | 29179.7   | 52898.68  | 37290.25  | 53878.66  | 42949.27  | 46778.02  | 39309.27  | 27116.6   |
| 46290.84  | 41956.4   | 27186.85  | 51151.46  | 38373.19  | 51485.1   | 46313.9   | 40205.28  | 34474.92  | 24875.27  |
| 43513.82  | 41852.5   | 31020.07  | 50188.67  | 41606.02  | 55776.03  | 41078.03  | 37076.47  | 36077.9   | 27401.47  |



|           |           |           |           |           |           |           |           |           |           |
|-----------|-----------|-----------|-----------|-----------|-----------|-----------|-----------|-----------|-----------|
| LP219.138 | LP219.138 | LP219.138 | LP219.138 | LP219.138 | LP219.138 | LP219.160 | LP219.211 | LP219.211 | LP219.211 |
| 50550.99  | 39795.68  | 45765.44  | 45033.3   | 38130.33  | 43272.74  | 277184.3  | 337002.7  | 366922    | 295846.3  |
| 49610.13  | 39792.27  | 39463.18  | 54918.26  | 42358.13  | 40065.41  | 64563.62  | 316759.5  | 355372.1  | 273567.2  |
| 49861.31  | 42223.29  | 44661.59  | 48027.26  | 43269.32  | 40522.56  | 304033    | 281293.2  | 272018.7  | 227209.7  |
| 51226.61  | 37950.65  | 46471.98  | 52841.16  | 40659.14  | 42075.08  | 333069.6  | 33725.98  | 34257.36  | 38459.75  |
| 56749.65  | 40213.91  | 41184.33  | 53773.97  | 39152     | 44193.54  | 382410.2  | 329514.7  | 322803.6  | 279413.5  |

|           |           |           |           |           |           |           |           |           |           |
|-----------|-----------|-----------|-----------|-----------|-----------|-----------|-----------|-----------|-----------|
| LP219.211 | LP220.039 | LP220.039 | LP220.039 | LP220.039 | LP220.039 | LP220.039 | LP220.177 | LP220.177 | LP220.177 |
| 267615.4  | 43011.95  | 33289.86  | 37751.87  | 29039.88  | 30455.63  | 35119.86  | 16932.52  | 18045.45  | 44870.28  |
| 264203.2  | 31870.94  | 25084.38  | 35917.84  | 26434.29  | 26127.51  | 36227.76  | 18319.2   | 20526.32  | 46096.99  |
| 256808.3  | 28407     | 27506.64  | 31747.14  | 32779.34  | 29223.49  | 38088.5   | 17835.54  | 20344.06  | 49258.66  |
| 57857.31  | 32382.21  | 26850.15  | 38697.26  | 24584.2   | 29578.61  | 39073.23  | 18878.04  | 23577.73  | 49332.02  |
| 353938.3  | 32541.89  | 22864.35  | 37276.85  | 30883.46  | 33755.04  | 40725.8   | 23987.65  | 29011.3   | 65964.29  |

|           |           |           |           |           |           |           |           |           |           |
|-----------|-----------|-----------|-----------|-----------|-----------|-----------|-----------|-----------|-----------|
| LP220.177 | LP220.177 | LP220.177 | LP220.177 | LP220.177 | LP220.178 | LP220.178 | LP220.178 | LP220.178 | LP220.177 |
| 25779.98  | 26672.75  | 52075.01  | 48117.16  | 54024.43  | 47005.9   | 40201.76  | 38100.26  | 37077.27  | 46161.77  |
| 27387.89  | 24873.57  | 54708.18  | 51021.96  | 61023.31  | 47954.02  | 40757.88  | 38695.62  | 43886.55  | 41253.56  |
| 30141.88  | 24245.21  | 57579.1   | 54372.73  | 49678.48  | 53150.37  | 41050.48  | 40351.33  | 34651.9   | 46866.02  |
| 29205.66  | 29287.66  | 59018.72  | 58293.15  | 51932.19  | 54053.5   | 47546.6   | 40979.34  | 43180.37  | 54145.45  |
| 37877.54  | 34917.18  | 70684.01  | 71080.25  | 69101.79  | 63233.08  | 56620.69  | 48541.75  | 51823.83  | 62455.29  |

|           |           |           |           |           |           |           |           |           |           |
|-----------|-----------|-----------|-----------|-----------|-----------|-----------|-----------|-----------|-----------|
| LP220.178 |
| 43548.88  | 38419.64  | 56228.59  | 56668.74  | 58022.36  | 57867.54  | 52447.59  | 45402.47  | 45855.21  | 49520.2   |
| 43489.83  | 43255.95  | 68233.79  | 53680.89  | 59584.12  | 57430.7   | 53504.4   | 45219.64  | 44254.39  | 43111.85  |
| 46500.41  | 41511.22  | 72009.5   | 55470.66  | 58748.28  | 65752.51  | 50145.45  | 43779.66  | 44072.13  | 52735.85  |
| 46269.27  | 39406.99  | 73616.17  | 68044     | 60284.17  | 66551.73  | 54975.51  | 48772.4   | 55250.03  | 53785.08  |
| 55698.34  | 50799.38  | 91922.27  | 79044.71  | 80107.42  | 82350.75  | 70874.85  | 58603.53  | 52898.88  | 59551.25  |

|           |           |           |           |           |           |           |           |           |           |
|-----------|-----------|-----------|-----------|-----------|-----------|-----------|-----------|-----------|-----------|
| LP220.178 |
| 56521.38  | 31745.56  | 43428.8   | 38774.21  | 28095.33  | 39669.57  | 36177.96  | 31701.43  | 42506.33  | 44117.68  |
| 52837.45  | 33786.11  | 41229.75  | 38754.16  | 29501.08  | 40096.39  | 30357.71  | 35218.76  | 44149.06  | 45441.86  |
| 57544.8   | 36125.15  | 44238.95  | 41858.78  | 28056.96  | 43211.22  | 33165.37  | 37987.72  | 49306.12  | 49364.78  |
| 60645.74  | 35784.65  | 50788.63  | 46069.91  | 31795.72  | 45575.17  | 40090.62  | 39152.44  | 51399.32  | 52782.17  |
| 77101.43  | 40562.14  | 57377.94  | 56637.2   | 35135.07  | 62778.47  | 43898.23  | 49335.63  | 65607.92  | 67083.69  |

|           |           |           |           |           |           |           |           |           |           |
|-----------|-----------|-----------|-----------|-----------|-----------|-----------|-----------|-----------|-----------|
| LP220.178 | LP220.178 | LP220.177 | LP220.177 | LP220.178 | LP220.178 | LP220.178 | LP220.178 | LP220.179 | LP220.179 |
| 36972.41  | 76893.9   | 48692.67  | 24538.21  | 72504.81  | 32059.12  | 39356.15  | 71089.45  | 43171.35  | 50096.16  |
| 34191.22  | 70998.87  | 50750.83  | 25549.43  | 70105.17  | 29689.25  | 44208.68  | 72545.88  | 43953.95  | 56143.55  |
| 39333.23  | 71671.83  | 45114.09  | 25474.69  | 67748.85  | 34711.02  | 45005     | 75054.63  | 42968.66  | 57413.84  |
| 41383.1   | 78749.3   | 51885.5   | 27346.29  | 77302.73  | 38356.19  | 49268.28  | 81115.73  | 51374.1   | 62844.5   |
| 45659.95  | 103053.3  | 62403.03  | 35116.6   | 87103.35  | 47468.87  | 65467.59  | 104503.5  | 60811.68  | 74683.94  |

|           |           |           |           |           |           |           |           |           |           |
|-----------|-----------|-----------|-----------|-----------|-----------|-----------|-----------|-----------|-----------|
| LP220.178 | LP220.178 | LP220.179 | LP220.178 | LP220.178 | LP220.179 | LP220.178 | LP220.178 | LP220.177 | LP220.178 |
| 45166.38  | 43426.18  | 68097.28  | 32179.43  | 32551.1   | 59832.32  | 31660.11  | 44917.86  | 23191.63  | 27490.99  |
| 36371.37  | 46837.66  | 61123.92  | 32219.73  | 31834.23  | 56053.93  | 32478.34  | 45490.22  | 19683.38  | 23269.33  |
| 42581.19  | 50480.42  | 67100.14  | 29880.59  | 33823.97  | 65943.28  | 34587     | 43641.27  | 22147.36  | 29041.7   |
| 44930.75  | 55005.97  | 69234.97  | 33862.32  | 37404.84  | 66993.01  | 42785.17  | 53920.32  | 22046.19  | 30461.4   |
| 55052.45  | 64389.91  | 81288.32  | 36800.37  | 44649.81  | 81542.37  | 51694.97  | 60722.73  | 28360.27  | 33709.65  |

|           |           |           |           |           |           |           |           |           |           |
|-----------|-----------|-----------|-----------|-----------|-----------|-----------|-----------|-----------|-----------|
| LP220.178 | LP220.177 | LP220.177 |
| 45657.91  | 32356.53  | 42777.63  | 44333.96  | 32186.27  | 57001.12  | 32210.66  | 36023.71  | 24842.61  | 36547     |
| 48286.78  | 32173.62  | 34002.81  | 52349.59  | 28468.11  | 61273.97  | 27663.48  | 40563.37  | 24515.77  | 36773.82  |
| 47967     | 34793.8   | 42946.66  | 54606.18  | 33965.57  | 58986.11  | 29518.79  | 43854.67  | 24709.09  | 36505.24  |
| 55783.72  | 33870.51  | 44989.64  | 53105.86  | 39972.75  | 73337.71  | 33657.05  | 43637.31  | 27476.42  | 39491.81  |
| 65473.63  | 39720.49  | 53589.15  | 64717.86  | 44473.35  | 84571.68  | 40985.36  | 50977.34  | 33934.56  | 51207.72  |



|           |           |           |           |           |           |           |           |           |           |
|-----------|-----------|-----------|-----------|-----------|-----------|-----------|-----------|-----------|-----------|
| LP220.178 | LP220.179 | LP220.178 | LP220.178 |
| 28478.99  | 30485.31  | 25113.11  | 37448.1   | 52327.36  | 27323.44  | 26286.53  | 51335.52  | 54786.09  | 46404.57  |
| 29499.49  | 30765.98  | 25035.43  | 33887.67  | 64230.1   | 28737.72  | 28555.82  | 50904.03  | 56254.57  | 48309.1   |
| 30362.54  | 35562.35  | 27725.66  | 34914.15  | 63656.16  | 31459.12  | 32546.06  | 56354.46  | 57620.32  | 50417.38  |
| 30947.6   | 36067.38  | 30003.5   | 39907.58  | 74691.15  | 31295.94  | 32254.96  | 59016.64  | 63849.87  | 55559.93  |
| 38528.52  | 41212.01  | 36470.29  | 49645.18  | 87091.31  | 38886.14  | 40619.8   | 72880.91  | 74317.85  | 66720.57  |

|           |           |           |           |           |           |           |           |           |           |
|-----------|-----------|-----------|-----------|-----------|-----------|-----------|-----------|-----------|-----------|
| LP220.178 | LP220.178 | LP220.178 | LP220.179 | LP220.179 | LP220.178 | LP220.179 | LP220.178 | LP220.178 | LP220.934 |
| 45677.77  | 52722.75  | 32843.85  | 42016.93  | 36421.29  | 30964.42  | 37612.53  | 35642.7   | 29668.42  | 96809.99  |
| 45718.93  | 52340.62  | 30547.09  | 42820.06  | 42167.29  | 32507.9   | 37159.05  | 32306.78  | 31590.68  | 88147.32  |
| 48351.12  | 60960.9   | 34184.48  | 41705.82  | 41009.97  | 34047.86  | 37755.88  | 33035.14  | 33140.08  | 95856.33  |
| 52362.46  | 67904.06  | 39551.19  | 49650.83  | 43413.82  | 37348.04  | 39455.31  | 40708.58  | 36041.17  | 86342.25  |
| 60504.25  | 80214.24  | 40224.19  | 60507.65  | 53442.21  | 47206.82  | 51476.77  | 56099.93  | 41897.62  | 95509.5   |

|           |           |           |           |           |           |           |           |           |           |
|-----------|-----------|-----------|-----------|-----------|-----------|-----------|-----------|-----------|-----------|
| LP221.117 |
| 141305.9  | 44898     | 73196.91  | 36336.69  | 38813.66  | 47755.94  | 48261.09  | 45132.49  | 65482.67  | 55016.6   |
| 122607.6  | 51151.88  | 75703.99  | 31053.44  | 30810.98  | 55098.6   | 59421.76  | 34568.63  | 59416.4   | 53466.08  |
| 128610.3  | 44900.39  | 75453.93  | 27624.52  | 37843.35  | 58760.09  | 43596.11  | 40772.41  | 55469.91  | 61906.11  |
| 126774.8  | 61495.81  | 70908.72  | 47008.79  | 37147.17  | 62362.91  | 48515.6   | 37740.38  | 58026.94  | 50065.31  |
| 111591    | 53185.36  | 53546.87  | 40201.13  | 38664.97  | 54215.79  | 40066.68  | 53382.62  | 56173.47  | 57226.55  |

|           |           |           |           |           |           |           |           |           |           |
|-----------|-----------|-----------|-----------|-----------|-----------|-----------|-----------|-----------|-----------|
| LP221.117 |
| 54798.31  | 64418.65  | 32977.69  | 40001.86  | 51508.59  | 60908.83  | 24781.93  | 39856.56  | 30686.77  | 46655.33  |
| 57800.53  | 68993.24  | 29002.86  | 37584.53  | 55775.79  | 67284.03  | 21981.05  | 36250.27  | 38073.9   | 46963.84  |
| 53236.94  | 57910.23  | 32410.4   | 39139.5   | 53104.09  | 67766.96  | 20972.7   | 36811.35  | 34338.24  | 42550.77  |
| 58415.59  | 57682.81  | 25691.55  | 37746.31  | 56502.98  | 65848.44  | 17442.18  | 37438.62  | 29982.88  | 45712.26  |
| 59530.64  | 57707.21  | 30298.54  | 38942.36  | 58244.82  | 65740.61  | 25432.8   | 37764.8   | 29236     | 42559.61  |

|           |           |           |           |           |           |           |           |           |           |
|-----------|-----------|-----------|-----------|-----------|-----------|-----------|-----------|-----------|-----------|
| LP221.117 |
| 48397.34  | 67845.77  | 75675.95  | 70693.43  | 100710.9  | 49655.48  | 75137.98  | 56482.45  | 68842.22  | 67759.7   |
| 47429.64  | 77286.57  | 76096.95  | 77181.26  | 88535.48  | 57074.86  | 65368.49  | 60152.95  | 52771.07  | 50947.32  |
| 46029.62  | 69957.71  | 72540.37  | 95615.73  | 59304.49  | 53569.22  | 68993.82  | 63964.82  | 55535.54  | 54247.14  |
| 47415.42  | 76720.49  | 75806.38  | 80720.23  | 63426.63  | 58184.99  | 66013.39  | 73138.86  | 53247.49  | 53836.7   |
| 44840.8   | 75110.53  | 100213.1  | 84102.19  | 56018.78  | 56809.93  | 65397.11  | 66554.76  | 61610.83  | 61590.45  |

|           |           |           |           |           |           |           |           |           |           |
|-----------|-----------|-----------|-----------|-----------|-----------|-----------|-----------|-----------|-----------|
| LP221.117 |
| 67082.95  | 73120.17  | 72955.87  | 52412.42  | 67043.19  | 51685.47  | 56110.05  | 71832.85  | 53626.45  | 44134.19  |
| 61140.45  | 55866.61  | 63273.95  | 45617.07  | 62530.16  | 45426.33  | 53009.95  | 50835.41  | 44323.3   | 47441.56  |
| 68660.72  | 64476.84  | 57257.87  | 47327.32  | 61214.71  | 49505.39  | 54215.16  | 50720.72  | 52192.15  | 42780.35  |
| 57979.47  | 62268.93  | 59198.16  | 54290.74  | 85618.53  | 54214.67  | 54429.87  | 49506.35  | 49119.18  | 44182.61  |
| 54644.71  | 54764.57  | 61417.74  | 54534.79  | 63875.31  | 52601.93  | 49192.69  | 53341.52  | 48408.54  | 45517.61  |

|           |           |           |           |           |           |           |           |           |           |
|-----------|-----------|-----------|-----------|-----------|-----------|-----------|-----------|-----------|-----------|
| LP221.117 | LP221.118 | LP221.118 | LP221.118 | LP221.118 | LP221.118 | LP221.118 | LP221.154 | LP221.153 | LP221.154 |
| 52444.09  | 65248.1   | 52898.24  | 37890.12  | 61435.51  | 51428.62  | 75016.78  | 48031.96  | 51638.85  | 22438.05  |
| 54784.94  | 62484.37  | 54060.99  | 39330.76  | 61990.26  | 60175.34  | 72405.55  | 44976.57  | 46268.22  | 22276.89  |
| 53530.59  | 59348.73  | 56747.69  | 39278.39  | 58766.6   | 49625.53  | 66884.61  | 46934.99  | 53053.06  | 24373.6   |
| 51967.03  | 64265.77  | 52329.01  | 34941.39  | 77078.43  | 54938.2   | 73483.37  | 49770.37  | 53719.89  | 19461.65  |
| 49890.32  | 58848.32  | 61150.71  | 38837.44  | 58661.58  | 51489.91  | 75723.41  | 50563.6   | 51809.87  | 21839.41  |

|           |           |           |           |           |           |           |           |           |           |
|-----------|-----------|-----------|-----------|-----------|-----------|-----------|-----------|-----------|-----------|
| LP221.153 | LP221.153 | LP221.154 | LP221.153 |
| 23749.58  | 33038.46  | 48939.09  | 30779.85  | 44228.78  | 34316.62  | 43309.13  | 42217.64  | 40702.95  | 35427.31  |
| 23995.67  | 35436.35  | 45422.73  | 35336.9   | 46546.54  | 32999.69  | 38302.81  | 47864.41  | 34113.76  | 32227.36  |
| 21934.27  | 34719.49  | 42954.48  | 37568.39  | 47878.92  | 35850.7   | 43844.79  | 46194.46  | 42724.4   | 31086.54  |
| 23725.24  | 33487.17  | 46555.39  | 33556.67  | 43926.41  | 32932.26  | 39352.5   | 47216.69  | 39929.41  | 33626.42  |
| 18116.31  | 33186.26  | 51573.65  | 32963.71  | 48644.23  | 37259.6   | 44671.87  | 47330.97  | 37977.17  | 37544.95  |



|           |           |           |           |           |           |           |           |           |           |
|-----------|-----------|-----------|-----------|-----------|-----------|-----------|-----------|-----------|-----------|
| LP221.154 | LP221.154 | LP221.154 | LP221.154 | LP221.153 | LP221.154 | LP221.154 | LP221.153 | LP221.154 | LP221.154 |
| 42276.96  | 22406.84  | 19362.26  | 23139.65  | 35756.05  | 36546.11  | 35612.21  | 43485.72  | 28011.14  | 36632.65  |
| 40587.18  | 22597.03  | 21690.21  | 22003.43  | 29571.24  | 30741.78  | 36753.63  | 40131.98  | 27703.16  | 36400.79  |
| 36448.8   | 26179.11  | 22840.39  | 22471.69  | 34447.7   | 36959.57  | 34960.02  | 40392.01  | 26996.92  | 38590.78  |
| 38115.24  | 29784.5   | 22310.49  | 22620.74  | 31346.3   | 37104.25  | 39748.15  | 41946.73  | 29213.71  | 35751.12  |
| 42603.46  | 22546.18  | 20345.45  | 19313.44  | 32104.9   | 35046.31  | 36896.1   | 41817.78  | 29511.38  | 38489.19  |

|           |           |           |           |           |           |           |           |           |           |
|-----------|-----------|-----------|-----------|-----------|-----------|-----------|-----------|-----------|-----------|
| LP221.154 | LP221.154 | LP221.154 | LP221.153 | LP221.154 | LP221.154 | LP221.154 | LP221.154 | LP221.153 | LP221.154 |
| 36711.81  | 41129.02  | 21278.29  | 31698.14  | 33399.52  | 46665.28  | 17729.18  | 34398.71  | 33643.29  | 44694.88  |
| 33213.95  | 39835.94  | 21158.38  | 33042.04  | 35441.97  | 46975.06  | 18785.88  | 34732.58  | 34193.65  | 44963.26  |
| 33379.18  | 41586.8   | 24211.75  | 35025.51  | 35868.57  | 45276.94  | 19757.55  | 36338.78  | 34322.3   | 44136.92  |
| 31796.04  | 39526.46  | 20706.42  | 37283.92  | 32745.01  | 44024.74  | 18592.97  | 35998.27  | 29815.62  | 44345.19  |
| 34003.44  | 40175.58  | 19964.58  | 33168.34  | 37365.46  | 50706.18  | 18083.5   | 33649.52  | 35003.65  | 46294.17  |

|           |           |           |           |           |           |           |           |           |           |
|-----------|-----------|-----------|-----------|-----------|-----------|-----------|-----------|-----------|-----------|
| LP221.154 | LP221.153 | LP221.153 | LP221.154 | LP221.154 | LP221.153 | LP221.154 | LP221.154 | LP221.153 | LP221.154 |
| 29886.81  | 28738.53  | 47769.84  | 45385.43  | 48149.39  | 28150.38  | 21335.51  | 36754.19  | 64487.48  | 28806.78  |
| 31769.5   | 25445.56  | 54648.25  | 40545.74  | 48897.89  | 30238.36  | 19407     | 38229.25  | 61633.85  | 28685.43  |
| 34782.7   | 27902.85  | 56590.22  | 44454.22  | 51580.08  | 28973.57  | 26142.96  | 37817.37  | 69322.69  | 27034.7   |
| 32134.77  | 26059.11  | 56902.24  | 42540.64  | 52074.01  | 26535.9   | 23404.31  | 41152.83  | 64208.07  | 26344.89  |
| 32279.88  | 29906.81  | 60736.32  | 47600.56  | 55600.02  | 28800.39  | 26141.27  | 41211.22  | 63126.13  | 27051.13  |

|           |           |           |           |           |           |           |           |           |           |
|-----------|-----------|-----------|-----------|-----------|-----------|-----------|-----------|-----------|-----------|
| LP221.154 | LP221.154 | LP221.154 | LP221.154 | LP221.153 | LP221.154 | LP221.153 | LP221.154 | LP221.154 | LP221.153 |
| 23918.66  | 35405.85  | 33896.26  | 34375.63  | 40227.25  | 35680.67  | 33711.12  | 48758.08  | 27494.4   | 28490.91  |
| 26184.98  | 36380.97  | 30577.87  | 37042.07  | 37956.11  | 37321.81  | 29710.67  | 47356.48  | 28173.68  | 27310.35  |
| 24110.76  | 39557.15  | 31775.65  | 34917.59  | 39087.03  | 41820.11  | 24420.1   | 50762.32  | 28763.73  | 30117.3   |
| 24963     | 32293.17  | 31347.63  | 40721.67  | 37031.27  | 39935.83  | 28971.21  | 48034.88  | 24791.12  | 30586.89  |
| 25047.28  | 36964.44  | 35311.65  | 39611.82  | 40515.72  | 40821.82  | 30582.22  | 56724.43  | 31213.94  | 26213.4   |

|           |           |           |           |           |           |           |           |           |           |           |
|-----------|-----------|-----------|-----------|-----------|-----------|-----------|-----------|-----------|-----------|-----------|
| LP221.154 |
| 28929.29  | 59928.43  | 38258.49  | 43109.93  | 33068     | 60741.67  | 31346.98  | 43906.02  | 72359.29  | 29859.77  |           |
| 32138.24  | 57058.92  | 38170     | 41895.43  | 35684.84  | 60047.13  | 32283.79  | 38259.73  | 73012.09  | 40482.99  |           |
| 26333.74  | 53985.31  | 38302.28  | 43356.43  | 35539.77  | 66476.13  | 37100.69  | 43087.88  | 73964.66  | 36142.91  |           |
| 29907.39  | 58462.27  | 40085.18  | 42637.04  | 37680.8   | 63041.62  | 34481.79  | 43510.2   | 77004.55  | 35459.88  |           |
| 29863.87  | 64629.98  | 39703.72  | 47580.71  | 36080.54  | 64392.03  | 35208.71  | 43941.55  | 78875.39  | 34806.68  |           |

|           |           |           |           |           |           |           |           |           |           |
|-----------|-----------|-----------|-----------|-----------|-----------|-----------|-----------|-----------|-----------|
| LP221.154 | LP221.153 | LP221.154 | LP221.154 | LP221.153 | LP221.154 | LP221.154 | LP221.154 | LP221.154 | LP221.154 |
| 30906.23  | 63706.57  | 38806.32  | 27415.43  | 54615.58  | 43941.75  | 66218.13  | 48717.86  | 27892.92  | 49988.03  |
| 29421.79  | 59797.82  | 40972.49  | 26786.39  | 61582.71  | 42687.78  | 69332.44  | 49846.52  | 29708.97  | 58303.96  |
| 28806.01  | 67188.01  | 41102.3   | 24138.85  | 55760.64  | 44593.18  | 63823.53  | 53112.07  | 28384.73  | 53036.85  |
| 24819.07  | 63469.54  | 38659.22  | 29458.85  | 58195.46  | 43032.55  | 65432.57  | 52477.35  | 30115.06  | 53724.32  |
| 29502.28  | 61070.34  | 47503.66  | 24448.23  | 64875.13  | 45074.34  | 69999.23  | 54828.4   | 31436.11  | 59968.75  |

|           |           |           |           |           |           |           |           |           |          |
|-----------|-----------|-----------|-----------|-----------|-----------|-----------|-----------|-----------|----------|
| LP221.154 | LP221.154 | LP221.154 | LP221.153 | LP221.154 | LP221.154 | LP221.154 | LP221.154 | LP221.154 | LP221.19 |
| 30731.11  | 54839.74  | 24049.63  | 23494.94  | 71951.71  | 32648.3   | 37533.82  | 28694.26  | 47423.55  | 37441.94 |
| 27560.93  | 51736.21  | 26479.04  | 25977.06  | 67703.67  | 33453.59  | 40739.11  | 31539.03  | 43778.14  | 39294.57 |
| 28408.24  | 51436.24  | 25268.98  | 23376.28  | 74904.29  | 32048.91  | 39211.72  | 31817.58  | 43401.09  | 25229.02 |
| 25069.84  | 58533.72  | 24596.64  | 26343.47  | 61845.9   | 33664.62  | 37664.38  | 26281.73  | 47364.06  | 35707.56 |
| 27525.57  | 59820.47  | 25184.6   | 27239.11  | 68698.9   | 32741.13  | 39902.55  | 31421.06  | 45697.63  | 39546.82 |

|           |           |           |           |           |           |           |           |           |           |
|-----------|-----------|-----------|-----------|-----------|-----------|-----------|-----------|-----------|-----------|
| LP221.190 | LP221.190 | LP221.19_ | LP221.19_ | LP221.190 | LP221.190 | LP221.190 | LP221.190 | LP221.190 | LP221.190 |
| 38678.95  | 44677.25  | 66871.1   | 45699     | 29219.7   | 57423.45  | 37551.93  | 31128.25  | 39987.95  | 39594.78  |
| 40635.89  | 44489.66  | 61027.51  | 48084.85  | 30692.26  | 59395.91  | 35113.13  | 33961.65  | 35062     | 43086.16  |
| 28900.78  | 47056.12  | 43475.24  | 45423.61  | 32090.61  | 59513.39  | 35052.11  | 33608.1   | 35897.45  | 37141.31  |
| 43400.83  | 44205.57  | 68340.63  | 49228.29  | 29869.98  | 62235.82  | 34422.98  | 31607.28  | 41347.14  | 43060.57  |
| 46407.08  | 44291.18  | 54923.02  | 49326.89  | 31555.69  | 64519.01  | 35253.5   | 34150.57  | 40099.82  | 39023.8   |



|           |           |           |           |           |           |           |           |           |           |
|-----------|-----------|-----------|-----------|-----------|-----------|-----------|-----------|-----------|-----------|
| LP221.226 | LP222.112 |
| 33301.21  | 25198.82  | 25105.97  | 21698.58  | 17069.54  | 34469.38  | 24915.63  | 19932.48  | 26843.08  | 23404.41  |
| 37655.99  | 23580.17  | 24899.59  | 26871.51  | 24079.68  | 37933.85  | 29348.12  | 20331.19  | 32157.84  | 27693.81  |
| 29152.66  | 23626.6   | 23179.09  | 23947.64  | 22099.29  | 35572.32  | 27068.89  | 19346.06  | 28118.74  | 23921.04  |
| 32923.53  | 23547.75  | 24010.68  | 24156.49  | 20722.82  | 34038.55  | 29681.8   | 24960.71  | 30828.32  | 28240.66  |
| 27002.65  | 18578.61  | 21101.69  | 24361.57  | 24045.43  | 36841.26  | 27926.1   | 20925.65  | 32760.99  | 26432.8   |

|           |           |           |           |           |           |           |           |           |           |
|-----------|-----------|-----------|-----------|-----------|-----------|-----------|-----------|-----------|-----------|
| LP222.112 |
| 20763.7   | 39456.69  | 33308.82  | 21311.76  | 36505.91  | 24494.27  | 23067.84  | 23152.28  | 26623.59  | 32300.37  |
| 18614.85  | 40943.4   | 29078.37  | 22221.82  | 36337.49  | 22926.88  | 24982.2   | 25543.86  | 22996.34  | 36466.39  |
| 20432.6   | 36651.93  | 28816.09  | 23362.25  | 37664.22  | 21949.99  | 28105.46  | 19939.43  | 25413.74  | 37288.09  |
| 21684.7   | 41240.34  | 26041.38  | 22464.82  | 35040.19  | 23677.69  | 24251.43  | 24106.84  | 26430.31  | 31419.6   |
| 20021.15  | 40383.37  | 28290.65  | 24074.58  | 33892.95  | 22909.3   | 25155.36  | 24933.74  | 26216.67  | 34011.17  |

|            |            |            |            |            |            |            |            |            |            |
|------------|------------|------------|------------|------------|------------|------------|------------|------------|------------|
| LP222.112' |
| 21686.55   | 26054.43   | 26940.14   | 19989.35   | 17595.91   | 23936.97   | 17890.27   | 17692.99   | 15176.52   | 20438.76   |
| 22070.36   | 26387.84   | 30765.4    | 19615.03   | 23873.46   | 25047.44   | 16377.41   | 21508.81   | 19568.03   | 20191.09   |
| 21325.58   | 26215.6    | 31817.26   | 21069.22   | 20721.47   | 20460.2    | 18064.66   | 22848.23   | 17974.33   | 24530.95   |
| 22733.2    | 26462.81   | 30325.19   | 22118.94   | 25337.28   | 21580.8    | 17653.6    | 25300.43   | 22597.12   | 23366.2    |
| 20637.08   | 25411.41   | 29401.75   | 18758.64   | 19700.77   | 24513.43   | 15775.53   | 18941.45   | 18821.6    | 22653.35   |

|           |           |           |           |           |           |           |           |           |           |
|-----------|-----------|-----------|-----------|-----------|-----------|-----------|-----------|-----------|-----------|
| LP222.112 | LP222.112 | LP222.113 | LP222.113 | LP222.112 | LP222.120 | LP222.149 | LP222.148 | LP222.149 | LP222.149 |
| 24593.94  | 26920.61  | 26694.69  | 27456.62  | 19868.22  | 13700.18  | 31369.04  | 21044.84  | 20837.12  | 23467.88  |
| 23132.56  | 26341.5   | 27194.11  | 26676.61  | 18020.31  | 12975.67  | 36873.93  | 20623.91  | 16860.78  | 20635.49  |
| 21941.78  | 23364.9   | 23812.56  | 24032.68  | 22672.71  | 26910.32  | 35417.43  | 19714.48  | 17892.75  | 21066.26  |
| 25669.47  | 24904.82  | 28016.58  | 27235.31  | 22057.36  | 14019.46  | 36767.71  | 18643.29  | 15509.04  | 25724.72  |
| 25271.19  | 26294.77  | 24313.19  | 23760.7   | 21625.65  | 15939.3   | 36000.69  | 20506.51  | 19382.12  | 23824.49  |

|           |           |           |           |           |           |           |           |           |           |
|-----------|-----------|-----------|-----------|-----------|-----------|-----------|-----------|-----------|-----------|
| LP223.063 | LP223.063 | LP223.063 | LP223.063 | LP223.063 | LP223.096 | LP223.096 | LP223.096 | LP223.096 | LP223.097 |
| 42304.13  | 68415.02  | 66321.6   | 33015.71  | 64008.78  | 50154.63  | 47153.31  | 84298.03  | 96119.06  | 59308.74  |
| 49748.7   | 73049.31  | 64230.18  | 34769.71  | 67492.64  | 49146.95  | 63589.14  | 53375.84  | 62897.1   | 56735.66  |
| 50177.46  | 84268.42  | 72703.59  | 40031.72  | 70504.72  | 64341.16  | 69366.32  | 66788.52  | 89126.69  | 56376.44  |
| 54363.7   | 93669.52  | 71086.51  | 39531.52  | 66916.19  | 63760.6   | 89165.67  | 51837.29  | 53142.07  | 64429.75  |
| 57789.54  | 92987.29  | 67828.85  | 37258.11  | 71907.22  | 50192.84  | 55366.22  | 60140.15  | 70179.78  | 63925.19  |

|            |            |            |            |            |            |            |            |            |            |
|------------|------------|------------|------------|------------|------------|------------|------------|------------|------------|
| LP223.096! |
| 70217.4    | 71699.08   | 55977.43   | 39830.08   | 56065.54   | 50329.72   | 41346.91   | 33519.37   | 46674.9    | 47749.65   |
| 44797.2    | 52526.85   | 68358.29   | 48152.73   | 55063.96   | 46192.05   | 54324.78   | 52370.67   | 52407.99   | 49269.54   |
| 54630.96   | 53440.97   | 62795.57   | 44737.26   | 55303.25   | 50629.75   | 61929.86   | 52923.88   | 51184.44   | 42523.4    |
| 51202.37   | 38583.67   | 74221.77   | 43654.77   | 57847.52   | 50031.3    | 54721.52   | 52305.85   | 56290.83   | 46115.33   |
| 45380.38   | 60100.04   | 67959.5    | 48463.88   | 59660.98   | 50800.41   | 53806.34   | 57655.53   | 35600.62   | 50771.76   |

|           |           |           |           |           |           |           |           |           |           |
|-----------|-----------|-----------|-----------|-----------|-----------|-----------|-----------|-----------|-----------|
| LP223.096 | LP223.096 | LP223.097 | LP223.096 | LP223.097 | LP223.096 | LP223.096 | LP223.096 | LP223.096 | LP223.097 |
| 41075.56  | 52347.33  | 63966.64  | 60205.24  | 48167.08  | 40716.01  | 46474.98  | 52045.3   | 55928.67  | 55381.78  |
| 40026.65  | 69609.63  | 63391.61  | 38224.13  | 50305.61  | 41452.03  | 52293.21  | 55517.08  | 51667.01  | 50600.32  |
| 43725.89  | 72445.13  | 63807.91  | 40106.89  | 52960.11  | 38688.62  | 45759.31  | 52785.16  | 61271.93  | 56837.02  |
| 42162.05  | 70526.26  | 68580.86  | 39458.86  | 41909.12  | 41596.63  | 50040.18  | 47733.13  | 59815.55  | 56754.77  |
| 44563.39  | 67912.65  | 64282.47  | 40293.54  | 45816.74  | 36587.53  | 50571.89  | 51853.66  | 59081.42  | 62084.27  |

|           |           |           |           |           |           |           |           |           |           |
|-----------|-----------|-----------|-----------|-----------|-----------|-----------|-----------|-----------|-----------|
| LP223.096 | LP223.095 | LP223.096 | LP223.095 | LP223.096 | LP223.096 | LP223.095 | LP223.096 | LP223.096 | LP223.096 |
| 41474.42  | 25386.28  | 36145.51  | 35063.99  | 43905.44  | 44834.15  | 32467     | 37815.23  | 60766.66  | 38579.92  |
| 49509.59  | 28037.06  | 36070.1   | 39938     | 42577.94  | 43063.26  | 33767.1   | 36127.8   | 44953.68  | 39664.06  |
| 45282.31  | 30667.75  | 36319     | 40997.93  | 44824.39  | 45272.08  | 45821.16  | 42644.2   | 50512.24  | 40350.31  |
| 39893.18  | 27684.14  | 37922.66  | 35155.11  | 45295.72  | 41706.58  | 34459.25  | 39393.75  | 50983.64  | 37593.26  |
| 41076.33  | 25663.52  | 37026.86  | 45210.91  | 41936.28  | 44591.78  | 34006.12  | 40335.42  | 46930.44  | 39378.89  |



|           |           |           |           |           |           |           |           |           |           |
|-----------|-----------|-----------|-----------|-----------|-----------|-----------|-----------|-----------|-----------|
| LP223.096 | LP223.096 | LP223.096 | LP223.097 | LP223.096 | LP223.095 | LP223.096 | LP223.096 | LP223.096 | LP223.095 |
| 37619.88  | 48484.15  | 38824.02  | 42803.82  | 53369.5   | 47994.4   | 25760.37  | 47159.72  | 40541.06  | 43862.82  |
| 36047.28  | 52187.59  | 37651.91  | 44586.86  | 59556.06  | 44771.83  | 29094.63  | 47448.45  | 44461.84  | 48064.39  |
| 35983.5   | 49951.6   | 37952.29  | 46333.78  | 63607.4   | 46429.71  | 27745.81  | 43857.29  | 40199.72  | 53480.18  |
| 47233.7   | 67642.58  | 37869.16  | 43140.89  | 60933.2   | 45147.76  | 27352.92  | 43285.55  | 42754.78  | 56233.34  |
| 41673.31  | 51699.62  | 38987.71  | 44351.2   | 60800.8   | 42262.42  | 29569.62  | 45622.9   | 40557.24  | 57810.74  |

|           |           |           |           |           |           |           |           |           |           |
|-----------|-----------|-----------|-----------|-----------|-----------|-----------|-----------|-----------|-----------|
| LP223.096 | LP223.096 | LP223.095 | LP223.095 | LP223.095 | LP223.096 | LP223.096 | LP223.096 | LP223.096 | LP223.111 |
| 43304.25  | 35367.11  | 36385.31  | 25338.34  | 31915.13  | 46124.77  | 37414.38  | 46197.27  | 37556.97  | 60125.45  |
| 44207.55  | 36226.96  | 33622.16  | 27082.61  | 32663.46  | 49923.39  | 42914.43  | 39602.7   | 38890.83  | 51623.95  |
| 45693     | 34323.84  | 38277.84  | 27751.49  | 32469.65  | 45643.9   | 44547.27  | 41272.96  | 40740.44  | 53394.55  |
| 46686.19  | 34646.84  | 32538.38  | 29046.77  | 33808.65  | 46408.59  | 38828.74  | 36237.2   | 40444.91  | 50311.11  |
| 51054.2   | 37243.36  | 36487     | 28652.93  | 34203.61  | 46395.01  | 39305.08  | 38570.21  | 42554.71  | 49780.82  |

|           |           |           |           |           |           |           |           |           |           |
|-----------|-----------|-----------|-----------|-----------|-----------|-----------|-----------|-----------|-----------|
| LP223.112 | LP223.132 | LP223.132 | LP223.132 | LP223.132 | LP223.132 | LP223.132 | LP223.133 | LP223.133 | LP223.132 |
| 76097.81  | 58887.85  | 45339.9   | 58288.13  | 35432.62  | 41277.38  | 43879.54  | 60959.95  | 45072.35  | 39073.33  |
| 68779.12  | 65418.74  | 48188.43  | 59513.57  | 33985.46  | 38492.18  | 39937.39  | 63339.74  | 43359.2   | 33395.86  |
| 68158.95  | 67056.64  | 49174.51  | 55871.3   | 39355.84  | 44096.8   | 49862.88  | 65501.03  | 43061.21  | 39670.12  |
| 65238.45  | 59990.97  | 49379.18  | 59063.75  | 28848.87  | 41395.33  | 40740.09  | 63489     | 47822.36  | 37603.79  |
| 67895.9   | 62205.88  | 45818.24  | 52499.38  | 34888.62  | 42679.65  | 40507.55  | 54461.54  | 45890.25  | 33513.11  |

|            |           |           |           |            |           |            |           |            |            |
|------------|-----------|-----------|-----------|------------|-----------|------------|-----------|------------|------------|
| LP223.132! | LP223.133 | LP223.133 | LP223.133 | LP223.132! | LP223.133 | LP223.132! | LP223.133 | LP223.132! | LP223.132! |
| 50086.5    | 60782.41  | 58330.68  | 34622.79  | 64891.93   | 65362.62  | 45990.03   | 45845.89  | 41525.88   | 83134.6    |
| 51492.7    | 60830.34  | 54566.01  | 36486.9   | 59141.41   | 61340.97  | 44370.6    | 47866.16  | 53631.43   | 77429.52   |
| 51727.46   | 56897.68  | 52119.73  | 37034.11  | 60909.3    | 66047.84  | 49123.16   | 51923.03  | 51564.18   | 73981.92   |
| 51604.77   | 58520.51  | 56605.24  | 37420.3   | 63249.68   | 63022.57  | 48132.24   | 47917.59  | 52112.26   | 80812.18   |
| 52800.36   | 64331.04  | 50009.13  | 39504.39  | 63228.83   | 72250.43  | 54179.93   | 49934.2   | 43494.38   | 88678.36   |

|           |           |           |           |           |           |           |           |           |           |
|-----------|-----------|-----------|-----------|-----------|-----------|-----------|-----------|-----------|-----------|
| LP223.133 | LP223.133 | LP223.133 | LP223.133 | LP223.132 | LP223.132 | LP223.133 | LP223.133 | LP223.132 | LP223.133 |
| 49164.51  | 58413.48  | 54158.06  | 45304.55  | 60654.16  | 53453.14  | 63833.82  | 62612.91  | 60801.99  | 37644.8   |
| 43595.81  | 60734.08  | 55847.59  | 41193.13  | 60424.69  | 58610.69  | 64725.2   | 57734.52  | 68164.92  | 39113.14  |
| 52854.46  | 52770.3   | 56951.08  | 42396.67  | 67126.64  | 57636.86  | 65041.16  | 62164.94  | 68007.04  | 38194.14  |
| 45239.62  | 53545.19  | 60527.06  | 42927.58  | 65535.37  | 57244.64  | 70448.33  | 61385.67  | 65057.19  | 39938.93  |
| 46360.03  | 62782.53  | 57491.52  | 48746.39  | 62259.09  | 58572.18  | 63861.8   | 60762.98  | 66579.24  | 37051.9   |

|           |           |           |           |           |           |           |           |           |           |
|-----------|-----------|-----------|-----------|-----------|-----------|-----------|-----------|-----------|-----------|
| LP223.133 | LP223.133 | LP223.133 | LP223.169 |
| 30834.81  | 60685.19  | 63525.5   | 79224.96  | 66252.31  | 69747.98  | 60326.54  | 78390.29  | 66132.68  | 79755.9   |
| 38314.69  | 63963.26  | 61799.86  | 77017.89  | 72863.82  | 63856.26  | 60323.03  | 81017.42  | 66201.55  | 74349.22  |
| 37991.96  | 61434.75  | 59463.73  | 74133.05  | 62858.41  | 113928    | 63585.16  | 81334.52  | 70301.8   | 84986.91  |
| 36410.74  | 60462.95  | 65124.46  | 85907.71  | 69255.52  | 65515.76  | 66254.1   | 78953.73  | 66106.81  | 86543.7   |
| 41022.91  | 56926.51  | 64804.45  | 81227.8   | 73067.17  | 70251.7   | 62680.06  | 85213.01  | 64776.2   | 80644.62  |

|           |           |           |           |           |           |           |           |           |           |
|-----------|-----------|-----------|-----------|-----------|-----------|-----------|-----------|-----------|-----------|
| LP223.169 | LP223.169 | LP223.169 | LP223.169 | LP223.17_ | LP223.169 | LP223.169 | LP223.169 | LP223.17_ | LP223.169 |
| 58661.77  | 66804.69  | 60365.73  | 62241.86  | 65728.77  | 72490.69  | 70379.55  | 70837.77  | 44978.75  | 60569.01  |
| 57455.47  | 66158.5   | 54715.12  | 57763.87  | 68635.66  | 72874.09  | 69414.15  | 70080.45  | 50417.57  | 60295.95  |
| 56729.67  | 67264.72  | 63275.16  | 63958.51  | 70399.24  | 69837.36  | 66628.07  | 74115.01  | 50563.65  | 63037.75  |
| 56827.01  | 70632.93  | 61901.67  | 57879.96  | 71061.06  | 69561.15  | 72690.95  | 67825.57  | 51392.91  | 61330.42  |
| 59801.04  | 71847.09  | 59818.28  | 65111.8   | 76171.55  | 78707.63  | 64820.11  | 71764.63  | 47230.95  | 64469.75  |

|           |           |           |           |           |           |           |           |           |           |
|-----------|-----------|-----------|-----------|-----------|-----------|-----------|-----------|-----------|-----------|
| LP223.169 | LP223.17_ | LP223.17_ | LP223.170 | LP223.169 | LP223.169 | LP223.169 | LP223.17_ | LP223.170 | LP223.169 |
| 65341.84  | 59952.74  | 50961.11  | 63625.36  | 61007.84  | 64752.52  | 72421.21  | 39712.9   | 57407.41  | 61832.27  |
| 70253.44  | 50954.33  | 62183.34  | 63863.84  | 60794.3   | 66636.86  | 68748.92  | 40748.73  | 66396.53  | 57635.94  |
| 70469.46  | 53700.7   | 62432.1   | 64771.21  | 65793.8   | 65120.01  | 66392.13  | 41283.95  | 65192.86  | 51949.66  |
| 67129.48  | 53174.39  | 67928.31  | 61124.64  | 58874.84  | 69174.24  | 74409.25  | 44782.74  | 64729.71  | 62804.45  |
| 65744.89  | 57346.91  | 67866.98  | 65220.81  | 63771.05  | 73438.54  | 76677.19  | 43803.01  | 65845.1   | 59618.93  |



|           |           |           |            |           |           |           |           |            |           |
|-----------|-----------|-----------|------------|-----------|-----------|-----------|-----------|------------|-----------|
| LP223.169 | LP223.169 | LP223.169 | LP223.17_` | LP223.169 | LP223.169 | LP223.169 | LP223.169 | LP223.17_! | LP223.169 |
| 71017.34  | 49443.07  | 61141.07  | 63240.46   | 68155.62  | 55777.01  | 88340.18  | 45478.2   | 59389.8    | 65530.01  |
| 69757.07  | 44645.06  | 71745.75  | 57745.08   | 66251.58  | 57459.67  | 96615.74  | 49005.21  | 60595.5    | 66203.19  |
| 67552.79  | 49896.82  | 64810.79  | 69577.82   | 72920.62  | 58279.34  | 95877.67  | 53914.1   | 62496.57   | 77916.36  |
| 70195.48  | 50278.92  | 61840.03  | 72136.26   | 71159.83  | 61082.54  | 90452.69  | 48354.6   | 56848.59   | 65470.33  |
| 72373.16  | 45086.32  | 65859.29  | 69161.49   | 71934.64  | 59721.73  | 94310.2   | 56101.02  | 61766.68   | 61952.66  |

|           |           |           |           |           |           |           |           |           |          |
|-----------|-----------|-----------|-----------|-----------|-----------|-----------|-----------|-----------|----------|
| LP223.169 | LP223.170 | LP223.169 | LP223.169 | LP223.169 | LP223.170 | LP223.169 | LP223.169 | LP223.169 | LP223.17 |
| 54950.94  | 58862.67  | 43511.91  | 40765.39  | 60043.41  | 38881.07  | 51727.48  | 56484.89  | 48937.3   | 54037.56 |
| 54050.55  | 60511.52  | 42589.38  | 37758.73  | 67317.1   | 33932.62  | 61070.23  | 54145.55  | 44375.68  | 50368.85 |
| 54420.99  | 61876.32  | 45923.88  | 37580.36  | 68768.61  | 35352.64  | 58418.04  | 57964.7   | 46311.67  | 51360.64 |
| 56470.76  | 63963.96  | 41924.4   | 41272.33  | 67432.74  | 35538.72  | 63120.63  | 52364.88  | 44934.75  | 52563.07 |
| 56209.83  | 57276.07  | 47391.22  | 42745.36  | 67415.21  | 37022.48  | 62049.02  | 58513.45  | 45414.61  | 55127.98 |

|           |           |           |           |           |           |           |           |           |           |
|-----------|-----------|-----------|-----------|-----------|-----------|-----------|-----------|-----------|-----------|
| LP223.169 | LP223.169 | LP223.169 | LP223.169 | LP223.169 | LP223.205 | LP223.205 | LP223.205 | LP223.205 | LP223.205 |
| 43101.37  | 44138.98  | 38504.26  | 29943.09  | 31476.68  | 37257.8   | 52899.11  | 40882.96  | 65850.99  | 75980.76  |
| 41100.96  | 38118.74  | 43783.87  | 30730.8   | 37881.21  | 60710.01  | 69487.98  | 51999.31  | 73463.88  | 95760.17  |
| 43495.12  | 35861.84  | 40419.47  | 32387.12  | 36395.03  | 67883.93  | 73773.05  | 53552.14  | 73164.91  | 97469.2   |
| 45908.02  | 40274     | 43143.59  | 30759.09  | 35259.74  | 66201.64  | 71501.77  | 56265.46  | 77613.17  | 102134.2  |
| 38098.37  | 37201.73  | 38131.06  | 30017.5   | 34521.24  | 67225.16  | 72735.86  | 54814.72  | 76811.68  | 95699.16  |

|           |           |           |           |           |           |           |           |           |           |           |
|-----------|-----------|-----------|-----------|-----------|-----------|-----------|-----------|-----------|-----------|-----------|
| LP223.205 |
| 67117.09  | 46182.1   | 62111.44  | 73503.54  | 47407.42  | 55156.47  | 64151.61  | 56828.93  | 50347.95  | 73472.3   |           |
| 62835.73  | 45570.79  | 57166.38  | 72977.2   | 45977.64  | 46655.72  | 61543.38  | 56114.31  | 44722.08  | 71307.23  |           |
| 65733.49  | 42437.6   | 66245.81  | 78511.65  | 47534.34  | 50993.46  | 63397.59  | 55617.27  | 49116.85  | 64156.14  |           |
| 70956.26  | 44893.61  | 59981.07  | 74472.86  | 45864.25  | 51381.86  | 60638.19  | 60310.27  | 46441.3   | 60298.92  |           |
| 73369.26  | 45941.07  | 64521.2   | 76633.91  | 52039.18  | 50380.49  | 58511.58  | 60009.31  | 49472.74  | 71401.28  |           |

|           |           |           |           |           |           |           |           |           |           |
|-----------|-----------|-----------|-----------|-----------|-----------|-----------|-----------|-----------|-----------|
| LP223.205 | LP223.205 | LP223.205 | LP223.205 | LP223.205 | LP223.205 | LP223.206 | LP223.205 | LP223.205 | LP223.205 |
| 41647.6   | 84355.66  | 39574.76  | 51034.67  | 60008.87  | 54210.51  | 62368.84  | 54940.13  | 42816.09  | 43549.28  |
| 48760.36  | 85500.81  | 41438.98  | 46632.41  | 53053.18  | 52567.43  | 59650.22  | 56528.88  | 38749.65  | 51609.6   |
| 49169.83  | 87032.61  | 40281.58  | 45238.16  | 59660.84  | 55412.54  | 68356.71  | 50312.71  | 45642.7   | 52075.02  |
| 48713.27  | 87109.72  | 42863.35  | 51863.94  | 54954.49  | 51422.36  | 66659.01  | 55772.84  | 51917.95  | 50592.45  |
| 49635.23  | 88670.45  | 38078.94  | 48700.98  | 60871.16  | 51889.59  | 64964.65  | 62085.61  | 46484.06  | 54246.85  |

|           |           |           |           |           |           |           |           |           |           |
|-----------|-----------|-----------|-----------|-----------|-----------|-----------|-----------|-----------|-----------|
| LP223.205 | LP224.063 | LP224.127 | LP224.127 | LP224.128 | LP224.128 | LP224.128 | LP224.128 | LP224.128 | LP224.128 |
| 74867.31  | 147787.9  | 132854.9  | 95451.13  | 124934.2  | 117058.5  | 113798.8  | 103235.9  | 95665.84  | 113883.2  |
| 73900.09  | 175075.7  | 130227.6  | 93791.46  | 133691.9  | 121588.4  | 111331.5  | 107977.2  | 86189.85  | 111893.1  |
| 72720.24  | 155457.8  | 136527.8  | 97235.62  | 127917.7  | 145351.6  | 155462.8  | 87443.05  | 88677.37  | 126118.6  |
| 77062.38  | 155341.8  | 133076.7  | 96946.41  | 156415.3  | 111055.2  | 108328.3  | 102493    | 93893.78  | 120447.6  |
| 75692.37  | 147331.6  | 134377.4  | 92655.07  | 140550.7  | 116805.6  | 103500.7  | 98815.95  | 87517.9   | 113742.5  |

|            |           |           |           |           |           |           |           |           |           |
|------------|-----------|-----------|-----------|-----------|-----------|-----------|-----------|-----------|-----------|
| LP224.127! | LP224.128 |
| 72999.35   | 38274.63  | 115234.5  | 28252.88  | 115890.9  | 136112.6  | 111597.4  | 34956.12  | 157113.7  | 156415.9  |
| 70147.46   | 44601.04  | 111303.3  | 28771.27  | 98392.41  | 143269    | 99637.66  | 35831.61  | 137769.3  | 152720.6  |
| 57996.41   | 28535.35  | 122283    | 41725.51  | 124846.3  | 190102.6  | 111515.9  | 30370.22  | 224895.9  | 103329    |
| 65888.62   | 37569.76  | 114721.7  | 25563.81  | 97560.82  | 135372.8  | 111075    | 36560.89  | 154073.5  | 162494.5  |
| 68121.58   | 35872.67  | 108338.5  | 26630.06  | 90509.79  | 140787.7  | 111196.2  | 30839.18  | 156295.4  | 157758.1  |

|           |           |           |           |           |           |           |           |           |           |
|-----------|-----------|-----------|-----------|-----------|-----------|-----------|-----------|-----------|-----------|
| LP224.128 |
| 97190.89  | 127982.1  | 106605.9  | 59638.69  | 114380    | 66629     | 46874.57  | 113290.9  | 117723.7  | 166172.1  |
| 100544    | 138638.2  | 109034.2  | 67322.29  | 124783.1  | 65403.17  | 45578.59  | 119044.3  | 111054.2  | 170867.3  |
| 121318.1  | 127630.8  | 157288.9  | 90080.73  | 135065.8  | 73374.73  | 69720.42  | 133541.3  | 140614.1  | 173402.7  |
| 98973.37  | 131669    | 113090.3  | 63215.03  | 124667.3  | 61165.82  | 44083.38  | 125414.6  | 109475    | 174924.4  |
| 93548.09  | 119352    | 113567.9  | 67821.37  | 126684.3  | 60711.41  | 44030.81  | 110562.9  | 114556.1  | 168524.1  |



|           |           |           |           |           |           |           |           |           |           |
|-----------|-----------|-----------|-----------|-----------|-----------|-----------|-----------|-----------|-----------|
| LP224.128 |
| 60662.09  | 96124.53  | 32972.47  | 68585.62  | 45478.69  | 110828    | 124443.7  | 109008.6  | 145545.3  | 80744.79  |
| 55504.75  | 94064     | 30309.37  | 74981.26  | 44678.1   | 123920.8  | 128738.6  | 104296.8  | 141381.3  | 74296.78  |
| 38931.69  | 90608.81  | 32671.75  | 107366.3  | 42075.93  | 126689.9  | 93656.65  | 111544.4  | 96382.61  | 71305.63  |
| 58393.16  | 83492.65  | 29775.01  | 64855.59  | 42751.09  | 107675.5  | 126444.7  | 103665.8  | 137801.8  | 74954.66  |
| 54293.69  | 84271.87  | 26652.05  | 61390.94  | 49106.27  | 109093.8  | 136162.1  | 108551.9  | 130769.4  | 77687.57  |

|           |           |           |           |           |           |           |           |           |           |
|-----------|-----------|-----------|-----------|-----------|-----------|-----------|-----------|-----------|-----------|
| LP224.128 | LP224.127 | LP224.128 | LP224.128 | LP224.128 | LP224.128 | LP224.128 | LP224.128 | LP225.073 | LP225.112 |
| 159522.8  | 115311.4  | 92404.07  | 117297.5  | 101042.3  | 115916    | 120779.7  | 112266.2  | 45576.17  | 53306.21  |
| 167307.9  | 118369.9  | 99109.64  | 115873.6  | 95996.47  | 117778.7  | 118414.7  | 130965.2  | 41489.77  | 55007.55  |
| 188965.5  | 116869.9  | 124652    | 117086    | 94506.8   | 114099.1  | 130040.7  | 117300    | 40455.68  | 50286.49  |
| 168668    | 114537.4  | 94280.15  | 119779.9  | 101833.7  | 109903    | 122956.8  | 117674.9  | 43632.58  | 50492.24  |
| 186489.7  | 105713.6  | 96508.65  | 123639.9  | 98518.48  | 115276.7  | 128429.7  | 106765.9  | 44275.11  | 59806.99  |

|           |           |           |           |           |           |           |           |           |           |
|-----------|-----------|-----------|-----------|-----------|-----------|-----------|-----------|-----------|-----------|
| LP225.112 | LP225.112 | LP225.112 | LP225.112 | LP225.112 | LP225.111 | LP225.112 | LP225.111 | LP225.112 | LP225.111 |
| 46096.2   | 45243.19  | 60571.77  | 55726.57  | 56286.29  | 44359.78  | 43220.99  | 60524.42  | 54363.04  | 45823.65  |
| 50151.76  | 43425.58  | 59721.23  | 49576.35  | 50896.64  | 46909.64  | 45755.53  | 49254.03  | 54713.57  | 45863.64  |
| 49395.39  | 43103.57  | 67147.35  | 43942.43  | 47918.24  | 48609.5   | 45074.11  | 55788.49  | 52046.98  | 44525.59  |
| 45510.29  | 50118.71  | 56491.48  | 43091.59  | 49477.56  | 44904.62  | 45233.33  | 53981.59  | 50959.4   | 42693.51  |
| 48215.03  | 46485.98  | 62432.14  | 42917.56  | 48155.9   | 47244.22  | 47803.9   | 53041.24  | 54889.45  | 52497.64  |

|           |           |           |           |           |           |           |           |           |           |
|-----------|-----------|-----------|-----------|-----------|-----------|-----------|-----------|-----------|-----------|
| LP225.111 | LP225.112 | LP225.112 | LP225.112 | LP225.112 | LP225.111 | LP225.112 | LP225.112 | LP225.112 | LP225.112 |
| 34756.86  | 63786.36  | 53894.71  | 60593.33  | 56857.11  | 45485.24  | 45455.43  | 49591.32  | 42670.16  | 39178.35  |
| 54004.95  | 65378.03  | 53756.86  | 64939.45  | 57698.61  | 43448.08  | 48700.19  | 48313.02  | 37408.33  | 45644.91  |
| 54527.19  | 65894.47  | 53572.08  | 62261.07  | 57887.72  | 45733.21  | 49729.83  | 51798.09  | 42839.04  | 44399.11  |
| 52568.7   | 60507.59  | 47854.98  | 68799.5   | 54840.55  | 48595.29  | 50392.44  | 48643.39  | 37979.17  | 37227.25  |
| 52807.8   | 62868.67  | 53177.22  | 65471.19  | 55798.88  | 46414.96  | 48219.79  | 47289.95  | 36382.09  | 39080.51  |

|           |           |           |           |           |           |           |           |           |           |
|-----------|-----------|-----------|-----------|-----------|-----------|-----------|-----------|-----------|-----------|
| LP225.112 | LP225.111 | LP225.111 | LP225.111 | LP225.111 | LP225.111 | LP225.112 | LP225.111 | LP225.111 | LP225.111 |
| 45567.77  | 50101.93  | 80959.99  | 62732.14  | 44769.57  | 35802.98  | 57035.13  | 40043.44  | 37482.25  | 60588.03  |
| 45266.37  | 45022.55  | 77658.98  | 61550.41  | 40535.15  | 32964.81  | 59459.1   | 35966.93  | 42879.57  | 54910.15  |
| 40647.64  | 46534.49  | 73786.56  | 59187.19  | 39755     | 34015.76  | 59217.52  | 40624.89  | 46675.08  | 47308.23  |
| 44600.8   | 41097.4   | 75957.79  | 54737.04  | 43386.68  | 26927.18  | 52594.59  | 39685.33  | 39948.53  | 59341.08  |
| 44531.1   | 45996.5   | 78124.85  | 55726.66  | 40158.71  | 23137.51  | 56895.3   | 36554.22  | 43255.31  | 51798.38  |

|           |           |           |           |           |           |           |           |           |           |
|-----------|-----------|-----------|-----------|-----------|-----------|-----------|-----------|-----------|-----------|
| LP225.111 | LP225.111 | LP225.112 | LP225.110 | LP225.111 | LP225.112 | LP225.112 | LP225.113 | LP225.148 | LP225.148 |
| 51286.01  | 20961.79  | 49980.57  | 48791.2   | 26969.96  | 54607.5   | 51291.41  | 61234.1   | 59601.07  | 45260.92  |
| 54273.65  | 23241.15  | 53226.78  | 53984.44  | 33521.2   | 54491.15  | 49893.79  | 61265.25  | 64219.66  | 32994.07  |
| 52329.37  | 29252.13  | 53302.3   | 55732.37  | 31600.73  | 52270.82  | 33218.48  | 61580.78  | 59675.54  | 38049.39  |
| 53975.39  | 22302.85  | 44839.02  | 53886.89  | 33057.47  | 52861.91  | 48900.58  | 58888.5   | 65842.56  | 53418.27  |
| 44964.87  | 25741.68  | 52124.57  | 52964.94  | 33941.9   | 54429.43  | 50611.78  | 60245.5   | 67607.29  | 50627.99  |

|           |           |           |           |           |           |           |           |           |           |
|-----------|-----------|-----------|-----------|-----------|-----------|-----------|-----------|-----------|-----------|
| LP225.148 |
| 40456.55  | 45556.22  | 42364.77  | 66438.82  | 54130.75  | 47599.03  | 57434.27  | 60312.31  | 57375.82  | 54486.92  |
| 41539.83  | 45291.2   | 37434.18  | 56912.83  | 53190.76  | 42008.85  | 60427.96  | 62497.68  | 55778.03  | 54908.82  |
| 40846.47  | 38388.87  | 37466.75  | 55374.38  | 47533.94  | 42221.54  | 59413.8   | 59681.54  | 57798.31  | 50414.96  |
| 40200.44  | 46049.39  | 48090.67  | 70065.79  | 53277.69  | 51814.48  | 56730.67  | 71156.96  | 54083.64  | 52523.9   |
| 43090.92  | 48945.38  | 38640.71  | 62187.49  | 47651.24  | 49167.54  | 54435.28  | 63574.72  | 42588.18  | 60520.52  |

|           |           |           |           |           |           |           |           |           |           |
|-----------|-----------|-----------|-----------|-----------|-----------|-----------|-----------|-----------|-----------|
| LP225.148 | LP225.148 | LP225.148 | LP225.149 | LP225.148 | LP225.148 | LP225.149 | LP225.148 | LP225.149 | LP225.148 |
| 65420.3   | 65494.48  | 61520.78  | 39139.04  | 52705.44  | 38644.63  | 59503.43  | 54184.71  | 48297.71  | 50383.07  |
| 66312.34  | 60546.96  | 57585.62  | 43492.58  | 53045.53  | 38617.38  | 62419.4   | 49528.22  | 47149.18  | 55435.69  |
| 66329.77  | 60719.04  | 55964.17  | 41148.04  | 52025.42  | 39219.41  | 58906.92  | 47628.74  | 46341.78  | 54796.67  |
| 62259.15  | 56781.46  | 51507.54  | 39474.57  | 52226.04  | 34786.15  | 58277.81  | 47223.16  | 47493.48  | 51969.02  |
| 67398.87  | 62582.27  | 55147.2   | 43923.23  | 60481.3   | 36658.66  | 69947.55  | 50469.93  | 54349.66  | 50114.52  |



|           |           |           |           |           |           |           |           |           |           |
|-----------|-----------|-----------|-----------|-----------|-----------|-----------|-----------|-----------|-----------|
| LP225.148 | LP225.148 | LP225.148 | LP225.148 | LP225.149 | LP225.148 | LP225.148 | LP225.148 | LP225.149 | LP225.148 |
| 53631.38  | 34293.19  | 42275.31  | 57182.68  | 62652.95  | 59942.91  | 40482.24  | 50907.67  | 38346.13  | 78307.92  |
| 51966.81  | 34955.31  | 45652.48  | 52235.97  | 63336.49  | 52528.01  | 42301.14  | 47656.71  | 36969.52  | 78834.11  |
| 55514.22  | 33580.16  | 48688.79  | 52790.21  | 60359.8   | 55787.74  | 38600.04  | 48247.26  | 39427.83  | 81123.85  |
| 54247.19  | 37093.34  | 40029.26  | 55972.04  | 60925.91  | 56120.03  | 38808.67  | 52357.85  | 37893.33  | 78218.96  |
| 54063.88  | 32375.61  | 41862.38  | 57059.66  | 61563.4   | 54454.37  | 46563.29  | 46657.21  | 41032.02  | 83035.92  |

|           |           |           |           |           |           |           |           |           |           |
|-----------|-----------|-----------|-----------|-----------|-----------|-----------|-----------|-----------|-----------|
| LP225.148 | LP225.148 | LP225.149 | LP225.149 | LP225.148 | LP225.148 | LP225.148 | LP225.148 | LP225.149 | LP225.148 |
| 42608.98  | 48126.09  | 58392.43  | 72076.28  | 48709.67  | 58314.01  | 71225.21  | 45040.22  | 43877.88  | 49424.8   |
| 42512.79  | 44963.51  | 55229.07  | 70900.29  | 47373.54  | 53493.46  | 65507.24  | 39852.76  | 45278.59  | 46319.73  |
| 46888.71  | 45504.56  | 57448.42  | 70970.9   | 45889.53  | 54214.86  | 68455.89  | 46584.82  | 43807.17  | 48869.06  |
| 44398.86  | 47907.15  | 52666.94  | 72011.82  | 43269.89  | 56426.64  | 68759.94  | 46527.91  | 43447.68  | 52607.41  |
| 44161.85  | 48774.71  | 61873.81  | 84390.06  | 44099.87  | 61757.67  | 68084.85  | 43589.49  | 54680.62  | 47849.68  |

|           |           |           |           |           |           |           |           |           |           |
|-----------|-----------|-----------|-----------|-----------|-----------|-----------|-----------|-----------|-----------|
| LP225.148 | LP225.148 | LP225.185 | LP225.184 | LP225.185 | LP225.184 | LP225.185 | LP225.185 | LP225.184 | LP225.184 |
| 53053.7   | 56485     | 46429.28  | 63458.9   | 46387.25  | 60864.92  | 56007.99  | 48466.91  | 42104.07  | 52754.16  |
| 54516.2   | 57540.76  | 48957.82  | 62930.18  | 47536.55  | 59836.85  | 56463.22  | 36541.17  | 46520.92  | 48761.27  |
| 55449.14  | 55962.67  | 46999.26  | 60268.11  | 47274.54  | 58080.36  | 59930.58  | 40154.44  | 45849.94  | 49049.53  |
| 54387.39  | 62389.82  | 47950.46  | 63027.9   | 50588.2   | 60542.96  | 58544.97  | 43061.03  | 49995.24  | 52843.24  |
| 50910.97  | 59198.12  | 55803.39  | 65194.67  | 58300.9   | 66091.64  | 60144.93  | 49147.59  | 52022.66  | 56392.8   |

|           |           |           |           |           |           |           |           |           |           |
|-----------|-----------|-----------|-----------|-----------|-----------|-----------|-----------|-----------|-----------|
| LP225.185 | LP225.185 | LP225.184 | LP225.185 | LP225.184 | LP225.184 | LP225.185 | LP225.185 | LP225.185 | LP225.185 |
| 74711.42  | 85135.05  | 52228.02  | 44169.72  | 35062.26  | 55207.38  | 69080.82  | 32039.47  | 53403.37  | 52873.2   |
| 69464.9   | 82694.86  | 57095.06  | 43785.31  | 39404.91  | 52177.27  | 67785.29  | 29535.01  | 46006.74  | 56674.88  |
| 69420.46  | 83294.37  | 40078.54  | 44873.7   | 30807.9   | 34895.89  | 68454.59  | 33588.92  | 43039.04  | 43220.64  |
| 76271.28  | 85682.83  | 55862.08  | 41101.33  | 37555.11  | 51846.67  | 71486.89  | 30605.04  | 54250.54  | 56370.4   |
| 79241.75  | 84419.9   | 59158.83  | 49626.83  | 51011.07  | 59391.46  | 81078.2   | 32526.45  | 55806.46  | 66385.08  |

|           |           |           |           |           |           |           |           |           |           |
|-----------|-----------|-----------|-----------|-----------|-----------|-----------|-----------|-----------|-----------|
| LP225.184 | LP225.185 | LP225.184 | LP225.184 | LP225.196 | LP225.196 | LP225.196 | LP225.196 | LP225.196 | LP225.196 |
| 74335.02  | 57361.94  | 56581.17  | 34516.98  | 72311.77  | 80581.14  | 46527.42  | 87754.03  | 49678.12  | 67149.5   |
| 73033.63  | 61363.16  | 52466.28  | 31806.99  | 83544.19  | 51455.17  | 57023.13  | 39041.32  | 66989.14  | 43812.28  |
| 75690.83  | 47824.78  | 48733.68  | 26451.59  | 73117.68  | 62352.85  | 57862.03  | 60400.75  | 53317.56  | 50779.65  |
| 75146.01  | 56006.64  | 50822.81  | 34977.38  | 77122.3   | 50986.18  | 56262.32  | 65777.44  | 54930.82  | 55656.66  |
| 87401.82  | 64229.38  | 60017.59  | 36902.99  | 80510.17  | 57714.12  | 62736.35  | 76978.48  | 64893.58  | 64804.19  |

|           |           |           |           |           |           |           |           |           |           |
|-----------|-----------|-----------|-----------|-----------|-----------|-----------|-----------|-----------|-----------|
| LP225.196 |
| 87486.57  | 48287.38  | 73864.66  | 52809.5   | 48456.7   | 52899.26  | 48633.25  | 67165.03  | 70763.62  | 84757.64  |
| 63861.18  | 65344.33  | 46494.57  | 58894.01  | 46391.89  | 72097.25  | 45703.48  | 63781.05  | 50432.75  | 44616.52  |
| 59320.35  | 49977.25  | 40250.67  | 35442.5   | 44266.58  | 56608.11  | 44451.34  | 51450.18  | 53435.46  | 47231.16  |
| 60783.83  | 54557.16  | 42209.76  | 38384.76  | 47734.54  | 56478.47  | 52860.69  | 51223.38  | 54384.54  | 48072.69  |
| 58772.29  | 58622.49  | 41489.32  | 38781.46  | 53845.23  | 60127.69  | 56615.84  | 54784.64  | 58968.99  | 52157.67  |

|           |           |           |           |           |           |           |           |           |           |
|-----------|-----------|-----------|-----------|-----------|-----------|-----------|-----------|-----------|-----------|
| LP225.196 |
| 62113.28  | 57936.36  | 73084.13  | 75315.46  | 56427.86  | 44096.02  | 68918.71  | 71958.07  | 45022.73  | 46978.7   |
| 60278.41  | 49620.23  | 64585.91  | 69320.39  | 53273.85  | 42280.35  | 65681.19  | 62997.67  | 46271.75  | 43290.51  |
| 60356.71  | 48711.49  | 65608.1   | 63838.1   | 56304.01  | 40054.23  | 69750.94  | 63257.08  | 44370.35  | 45601.38  |
| 61028.2   | 57120.55  | 67156.88  | 66173.61  | 55287.66  | 47075.04  | 71817.58  | 68458.55  | 48179.38  | 43690.13  |
| 69397.69  | 60848.9   | 74747.38  | 73203.09  | 63436.69  | 49202.17  | 81468.7   | 73017.62  | 48943.06  | 49402.44  |

|           |           |           |           |           |           |           |           |           |           |
|-----------|-----------|-----------|-----------|-----------|-----------|-----------|-----------|-----------|-----------|
| LP225.196 | LP225.196 | LP225.196 | LP225.196 | LP225.196 | LP225.196 | LP225.221 | LP225.221 | LP225.221 | LP226.144 |
| 45270.72  | 52170.27  | 36715.55  | 42291.46  | 53412.33  | 60607.06  | 39100.64  | 90975.91  | 54250.98  | 29341.06  |
| 41293.43  | 48446.61  | 40901.04  | 38905.99  | 52272.99  | 56696.05  | 39161.36  | 85572.68  | 52855.43  | 34855.12  |
| 43766.95  | 52525.37  | 33780.82  | 32473.25  | 54828.84  | 60307.81  | 37969.47  | 83810.52  | 58765.87  | 34982.03  |
| 43620.63  | 55577.77  | 39978.43  | 40345.12  | 55975.15  | 65133.72  | 31785.2   | 87153.47  | 55233.53  | 29311.67  |
| 50827.21  | 62562.48  | 49778.38  | 39895.3   | 59287.61  | 71708.03  | 39082.04  | 85062.62  | 65405.51  | 29469.6   |



|           |           |           |           |           |           |           |           |           |           |
|-----------|-----------|-----------|-----------|-----------|-----------|-----------|-----------|-----------|-----------|
| LP226.143 | LP226.143 | LP226.144 | LP226.143 | LP226.159 | LP226.159 | LP226.159 | LP226.158 | LP226.159 | LP226.159 |
| 22843.49  | 32666.88  | 20400.79  | 16928.33  | 29113.05  | 43662.79  | 22007     | 32874.88  | 25474.48  | 56726.5   |
| 27001.62  | 32638.58  | 17308.16  | 18375.65  | 35599.95  | 42025.45  | 22773.2   | 30437     | 27001.68  | 54643.64  |
| 26864.24  | 33130.57  | 21871.22  | 16978.7   | 37540.47  | 45820.92  | 23301.61  | 29848.56  | 26066.16  | 51940.61  |
| 24246.28  | 30376.88  | 19069.36  | 15930.89  | 29991.81  | 44989.39  | 22246.76  | 35851.67  | 28873.94  | 54961.68  |
| 23164.25  | 31279.33  | 20269.26  | 15483.57  | 33190.38  | 46124.68  | 25813.5   | 35177.52  | 28702.47  | 56511.32  |

|           |           |           |           |           |           |           |           |           |           |
|-----------|-----------|-----------|-----------|-----------|-----------|-----------|-----------|-----------|-----------|
| LP226.159 |
| 31958.9   | 31660.05  | 18630.54  | 21668.34  | 22369.43  | 37523.72  | 32735.04  | 22807.42  | 27166.79  | 15773.48  |
| 33878     | 33235.17  | 19432.42  | 20475.24  | 22000.93  | 42864.32  | 30638.91  | 21893.64  | 28828.46  | 15019.77  |
| 32307.45  | 31371.49  | 20995.61  | 20091.18  | 20626.07  | 41198.27  | 31929.33  | 23577.98  | 28178.19  | 14220.45  |
| 36117.83  | 32467.47  | 20276.85  | 18655.08  | 22641.95  | 40313.34  | 32114.53  | 25289.75  | 29902.39  | 16762.41  |
| 32367.76  | 37183.73  | 24443.05  | 25723.09  | 25411.14  | 39245.44  | 36377.12  | 22111.38  | 32270.53  | 19469.66  |

|           |           |           |           |           |           |           |           |           |           |
|-----------|-----------|-----------|-----------|-----------|-----------|-----------|-----------|-----------|-----------|
| LP226.159 | LP226.158 | LP226.159 | LP226.159 |
| 19901.45  | 39014.16  | 67424.54  | 27643.41  | 30936.02  | 44426.54  | 20963.18  | 44397.15  | 40328.92  | 42701.7   |
| 20868.95  | 38677.42  | 68057.43  | 28513.92  | 32684.28  | 46935.49  | 21233.31  | 41769.77  | 35824.96  | 41793.81  |
| 20549     | 41650     | 62944.98  | 29278.78  | 35786.68  | 41904.02  | 21699.16  | 43929.91  | 31712.22  | 41934.14  |
| 20584.09  | 39978.61  | 71260.9   | 31842.18  | 32228.63  | 41550.07  | 23496.66  | 46869.06  | 37398.77  | 40797.73  |
| 24268.9   | 39966.73  | 72601.3   | 33046.21  | 36603.57  | 47227.62  | 23119.87  | 42688.45  | 41591.38  | 43415.45  |

|           |           |           |           |           |           |           |           |           |           |
|-----------|-----------|-----------|-----------|-----------|-----------|-----------|-----------|-----------|-----------|
| LP226.159 |
| 28187.95  | 27890.16  | 18135.48  | 54540.42  | 30632.54  | 22541.04  | 14972.79  | 29128.95  | 34876.88  | 39306.48  |
| 28054.4   | 31851.95  | 18703.74  | 53180.42  | 30631.5   | 20422.82  | 11836.8   | 30668     | 33924.76  | 32797.95  |
| 26844.45  | 28073.68  | 20265.18  | 54262.59  | 32010.76  | 25140.48  | 15088.7   | 28222.87  | 34088.13  | 31916.25  |
| 29166.65  | 28620.73  | 20276.32  | 55704.74  | 29692.25  | 21116.1   | 14945.77  | 28580.27  | 35381.64  | 35816.35  |
| 29187     | 29452.12  | 23726.48  | 49966.12  | 37396.07  | 25780.88  | 17777.23  | 33391.31  | 39626.11  | 43014.71  |

|           |           |           |           |           |           |           |           |           |           |
|-----------|-----------|-----------|-----------|-----------|-----------|-----------|-----------|-----------|-----------|
| LP226.159 | LP226.158 | LP226.159 | LP226.158 | LP226.159 | LP226.159 | LP226.159 | LP226.159 | LP226.159 | LP226.159 |
| 26184.13  | 31416.38  | 29162     | 27431.21  | 40874.96  | 54572.66  | 55106     | 25226.12  | 24716.34  | 38962.47  |
| 26363.59  | 38382.72  | 29650.56  | 28748.84  | 41611.93  | 52490.09  | 56325.98  | 26194.17  | 22074.27  | 34766.89  |
| 28887.34  | 35651.46  | 30313.09  | 30324.31  | 41400.81  | 52334.1   | 61585.48  | 28060.75  | 26993.14  | 32359.23  |
| 26654.69  | 33773.93  | 33410.44  | 31574.91  | 43679.83  | 48176.21  | 55982.82  | 29099.58  | 23569.27  | 39891.88  |
| 30614.46  | 38123.25  | 34022.23  | 33040.48  | 40787.73  | 53501.1   | 61109.62  | 31691.52  | 27043.77  | 34851.48  |

|           |           |           |           |           |           |           |           |           |           |
|-----------|-----------|-----------|-----------|-----------|-----------|-----------|-----------|-----------|-----------|
| LP226.159 |
| 25548.85  | 39919.73  | 41481.82  | 44042.03  | 40477.64  | 32095.73  | 33916.06  | 38205.97  | 18934.11  | 19482.33  |
| 27166.53  | 40220.24  | 44369.04  | 43188.62  | 44029.5   | 34129.68  | 30633.19  | 33401.94  | 18827.58  | 18650.19  |
| 26696.19  | 37169.47  | 41277.66  | 46364.84  | 42608.76  | 36014.46  | 32365.04  | 40261.35  | 19159.64  | 19694.33  |
| 27720.09  | 37017.15  | 42311.8   | 42699.47  | 44947.66  | 31593.33  | 32514.84  | 36678.42  | 20056.24  | 20421.15  |
| 30959.11  | 38467.4   | 48705.43  | 47752.88  | 47358.74  | 35852.31  | 35826.84  | 44535.69  | 23300.57  | 20778.2   |

|           |           |           |           |           |           |           |           |           |           |
|-----------|-----------|-----------|-----------|-----------|-----------|-----------|-----------|-----------|-----------|
| LP226.159 | LP226.159 | LP226.159 | LP226.159 | LP226.159 | LP226.159 | LP226.158 | LP226.158 | LP226.159 | LP226.159 |
| 43194.89  | 53000.99  | 47185.67  | 15512.65  | 43708.03  | 40686.26  | 36153.71  | 39694     | 57911.55  | 56565.3   |
| 39845.17  | 50210.14  | 53358     | 15930.7   | 43915.59  | 39159.18  | 36827.47  | 41722.28  | 52898.8   | 50255.38  |
| 40766.68  | 53727.26  | 52744.97  | 14812.35  | 39181.68  | 44357.02  | 38115.93  | 38263.54  | 50971.25  | 53525.67  |
| 40425.05  | 50010.27  | 57025.32  | 15655.86  | 44635.45  | 42043.38  | 39949.56  | 39519.96  | 54471.9   | 55635.7   |
| 44723.89  | 50242.59  | 54012.59  | 15199.57  | 43457.13  | 40708.51  | 39831.48  | 40303.49  | 52486.81  | 50313.71  |

|           |           |           |           |           |           |           |           |           |           |           |
|-----------|-----------|-----------|-----------|-----------|-----------|-----------|-----------|-----------|-----------|-----------|
| LP226.159 |
| 15747.15  | 52279.52  | 40653.57  | 24714.13  | 36796.71  | 44653.07  | 55075.9   | 31518.35  | 29910.16  | 39511.06  |           |
| 16766.24  | 50127.68  | 37074.65  | 25338.2   | 37736.08  | 44287.33  | 55164.38  | 32256.39  | 32038.27  | 44688.65  |           |
| 19739.41  | 49083.25  | 39031.77  | 26738.88  | 36798.67  | 46614.52  | 59854.24  | 35217.78  | 30819.6   | 42615.09  |           |
| 18010.73  | 54467.43  | 41061.26  | 27007.77  | 38159.78  | 43966.34  | 52647.68  | 39492.27  | 35106.52  | 46805.15  |           |
| 21326.45  | 52818.34  | 43709.34  | 31459.61  | 39500.27  | 47112.28  | 53914.8   | 39346.75  | 37364.46  | 44757.98  |           |



|           |           |           |           |           |           |           |           |           |           |
|-----------|-----------|-----------|-----------|-----------|-----------|-----------|-----------|-----------|-----------|
| LP226.159 | LP226.159 | LP226.158 | LP226.180 | LP226.180 | LP226.216 | LP226.216 | LP226.216 | LP226.216 | LP226.216 |
| 24322.26  | 30513.11  | 45046.57  | 43229.88  | 30168.28  | 49138.38  | 58129.64  | 60076.33  | 48268.95  | 60601.75  |
| 23668.14  | 28279.22  | 48982.06  | 39134.73  | 32249.53  | 52376.37  | 65596.5   | 45437.03  | 54732.82  | 61834.73  |
| 26554.2   | 30014.19  | 48474.92  | 41827.95  | 35795.83  | 49531.87  | 57373.43  | 72191.22  | 53928.67  | 54543.61  |
| 27024.9   | 31414.88  | 54588.57  | 47720.26  | 34873.41  | 47813.37  | 62508.65  | 46493.56  | 55524.22  | 48620.98  |
| 27364.42  | 33270.56  | 54937.44  | 43543.31  | 30221.1   | 58489.46  | 50864.32  | 59599.93  | 68347.15  | 63052.82  |

|           |           |           |           |           |           |           |           |           |           |
|-----------|-----------|-----------|-----------|-----------|-----------|-----------|-----------|-----------|-----------|
| LP226.216 |
| 45442.71  | 56286.62  | 44891.72  | 58331.38  | 49158.19  | 51704.06  | 54373.49  | 50462.09  | 57212.12  | 34582.31  |
| 49126.9   | 53476.42  | 49943.74  | 56255.16  | 47678.84  | 49029.25  | 57287.88  | 52102.67  | 59722.22  | 33559.4   |
| 50197.65  | 43048.51  | 71783.73  | 72094.87  | 44813.41  | 43025.48  | 50311.88  | 49208.59  | 55675.91  | 37806.54  |
| 46332.06  | 48212.65  | 40126.76  | 61862.73  | 45484.62  | 51194.07  | 56148.88  | 57264.65  | 57630.31  | 33409.89  |
| 59730.19  | 79623.55  | 56143.12  | 57742.54  | 48553.41  | 52237.29  | 61276.86  | 60501.58  | 63146.07  | 35945.28  |

|           |           |           |           |           |           |           |           |           |           |
|-----------|-----------|-----------|-----------|-----------|-----------|-----------|-----------|-----------|-----------|
| LP226.216 | LP226.217 | LP226.216 | LP226.216 | LP226.217 | LP226.216 | LP226.216 | LP226.216 | LP226.216 | LP226.216 |
| 42617.04  | 34670.94  | 51207.34  | 34791.76  | 34085.41  | 36879.39  | 43395.12  | 38690.1   | 44981.35  | 40482.92  |
| 39031.92  | 34393.16  | 58176.21  | 34127.1   | 34781.84  | 39069.42  | 47710.6   | 34436.11  | 43710.3   | 43838.08  |
| 41656.37  | 29068.23  | 55297.7   | 37194.8   | 28541.84  | 32832.15  | 45952.08  | 37628.58  | 41512.33  | 47279.58  |
| 43792.18  | 32523.66  | 54346.93  | 34347.96  | 33718.09  | 42529.22  | 45711.4   | 37770.6   | 46050.41  | 43245.5   |
| 39425.14  | 33197.75  | 56505.39  | 36167.02  | 39711.67  | 45158.16  | 45127.52  | 34793.85  | 49874.91  | 39028.48  |

|           |           |           |           |           |           |           |           |           |           |
|-----------|-----------|-----------|-----------|-----------|-----------|-----------|-----------|-----------|-----------|
| LP226.216 | LP226.273 | LP226.951 |
| 52001.54  | 29324.23  | 186832    | 167811.6  | 104386.1  | 210588.8  | 87900.78  | 206681    | 241515    | 224727.3  |
| 52045.3   | 26205.47  | 113217.1  | 137335    | 160738.9  | 286829.2  | 83546.76  | 182811.3  | 293331.9  | 188163.2  |
| 46429.11  | 24343.3   | 161729.8  | 153079.1  | 118004.5  | 255182.4  | 76525.54  | 234196.1  | 219680.2  | 219834.6  |
| 58912.09  | 21874.46  | 195784.8  | 191128.4  | 117325.4  | 254992.1  | 84403.25  | 211690.4  | 273833.2  | 278533.8  |
| 50522.99  | 22478.84  | 205113.8  | 140929.3  | 113535    | 183531.1  | 86952.77  | 246513.6  | 167794.2  | 279763.1  |

|           |           |           |           |           |           |           |           |           |           |
|-----------|-----------|-----------|-----------|-----------|-----------|-----------|-----------|-----------|-----------|
| LP226.951 |
| 117743.3  | 191467.6  | 186698.2  | 220188.4  | 167950.4  | 117178.1  | 170899.7  | 149972.5  | 120462.7  | 160303.7  |
| 134900.4  | 230559.3  | 242890.5  | 250641.3  | 278874.9  | 137503.6  | 165456.4  | 181465.3  | 114127.2  | 199208.6  |
| 120970.1  | 200914.3  | 170497.7  | 229877.4  | 157586.2  | 156558.5  | 159472.3  | 143158.3  | 108325.3  | 131991.6  |
| 130928    | 156109.9  | 149628.9  | 179299.6  | 176143.7  | 113308.4  | 162880.9  | 192184.3  | 109073.8  | 199226    |
| 110774.1  | 291337.4  | 183335.8  | 224330.1  | 159408.1  | 118371.5  | 166854.1  | 112904.5  | 125751    | 144298.4  |

|           |           |           |           |           |           |           |           |           |           |
|-----------|-----------|-----------|-----------|-----------|-----------|-----------|-----------|-----------|-----------|
| LP226.951 |
| 176414.4  | 210651.7  | 226018.7  | 146168.3  | 197215.3  | 84145.26  | 196544.1  | 179811.2  | 90226.91  | 86524.29  |
| 184346.6  | 277459.3  | 193811.6  | 160253.5  | 267690.7  | 95897.46  | 169639.6  | 141190.6  | 82989.86  | 97592.24  |
| 195546.4  | 213566.8  | 231036.5  | 150672.7  | 210093.8  | 89327.29  | 192807.2  | 200116.8  | 85421.13  | 73581.89  |
| 173476.7  | 307837.7  | 252651.7  | 152853.6  | 157527.9  | 105662.1  | 239489.9  | 205406    | 79908.72  | 81453.1   |
| 172698.4  | 204223.7  | 196800.9  | 141315.8  | 231918.7  | 93014.62  | 197674.3  | 214318.8  | 96031.79  | 85978.83  |

|            |            |            |            |            |            |            |            |            |            |
|------------|------------|------------|------------|------------|------------|------------|------------|------------|------------|
| LP226.951` |
| 220572.8   | 206674.3   | 138867.8   | 121774.9   | 255577.7   | 108821.5   | 130247.9   | 66783.77   | 195888.3   | 180897.7   |
| 189771.4   | 215808.8   | 127165.5   | 168059.3   | 256118.3   | 144267.6   | 122248     | 72014.91   | 189381.8   | 170327.1   |
| 225796.6   | 195674.6   | 138050.6   | 141953.9   | 244328.3   | 105381.5   | 126839.8   | 68531.27   | 207886.4   | 175183.8   |
| 284779.6   | 144039.5   | 123012     | 164147.4   | 318022.7   | 124258.7   | 112270.6   | 56604.72   | 211136.8   | 179698.2   |
| 222810.3   | 198618.7   | 138237.1   | 149486.4   | 232792.3   | 111866.2   | 117299.1   | 64442.63   | 187389.5   | 182225.2   |

|           |           |           |           |           |           |           |           |           |           |
|-----------|-----------|-----------|-----------|-----------|-----------|-----------|-----------|-----------|-----------|
| LP226.951 |
| 67940.35  | 228153.5  | 147840.5  | 197817    | 135882.3  | 226029.6  | 195750.2  | 108403.6  | 203882.9  | 81804     |
| 100371.5  | 219366.7  | 144644.8  | 174697.9  | 215544.8  | 264589.7  | 172545.3  | 84966.83  | 215480.2  | 117888.7  |
| 67248.21  | 210653.8  | 144874    | 185344.7  | 146575.4  | 224244.8  | 194277.1  | 111613.7  | 186336.6  | 75826.72  |
| 68862.7   | 221940.7  | 151615.9  | 192817.1  | 154105.7  | 235543.2  | 186808.6  | 91911.53  | 261296.9  | 103367.9  |
| 74719.8   | 197228.1  | 140952    | 189891.1  | 150615    | 287164    | 179565.6  | 98359.22  | 173545.2  | 79395.25  |



|           |           |           |           |           |           |           |           |           |           |
|-----------|-----------|-----------|-----------|-----------|-----------|-----------|-----------|-----------|-----------|
| LP226.951 |
| 22554.15  | 201233    | 86223.54  | 187793.1  | 100047.4  | 26726.1   | 32588.89  | 149753.5  | 105577.7  | 21771.11  |
| 24853.98  | 191169.3  | 105272.4  | 199213.7  | 109843.6  | 18906.38  | 50965.05  | 168120.4  | 100877.3  | 28092.86  |
| 19973.97  | 189866.3  | 87999.37  | 194597.6  | 98904.07  | 21182.77  | 30423.7   | 162448.6  | 103234.8  | 20689.02  |
| 15649.71  | 284961.1  | 86092.74  | 177771.8  | 96826.01  | 17153.87  | 27465.74  | 144609.6  | 98984.84  | 17212.62  |
| 16148.26  | 200402.1  | 90254.31  | 200301.9  | 104148.8  | 23771.25  | 30073.79  | 145446.7  | 98683.76  | 20385.25  |

|           |           |           |           |           |           |           |           |           |           |
|-----------|-----------|-----------|-----------|-----------|-----------|-----------|-----------|-----------|-----------|
| LP226.951 |
| 26558.21  | 161202.7  | 171189.7  | 98565.37  | 82256.15  | 22311.88  | 98099.98  | 22134.91  | 107852.1  | 28528.14  |
| 27958.17  | 164826.5  | 141322.3  | 151204.9  | 156870.3  | 16695.68  | 103905.7  | 17984.66  | 100490.1  | 43370.52  |
| 25115.99  | 170655.4  | 168368.5  | 99905.55  | 88907.9   | 18887.81  | 100521.8  | 19940.71  | 94994.59  | 26706.29  |
| 21400.39  | 179130.2  | 162510.6  | 97235.15  | 98498.39  | 16062.97  | 90405.24  | 17061.26  | 97756.35  | 22763.47  |
| 27124.96  | 167974.7  | 171295    | 102509.7  | 99397.3   | 20651.55  | 100376.5  | 19803.12  | 103446.3  | 27258.64  |

|           |           |           |           |           |           |           |           |           |           |
|-----------|-----------|-----------|-----------|-----------|-----------|-----------|-----------|-----------|-----------|
| LP226.951 |
| 84629.61  | 178952.9  | 50031.73  | 108369.3  | 58219.01  | 125430.7  | 34013.96  | 120144.6  | 127143.4  | 30845.38  |
| 103862.4  | 253493.8  | 52248.25  | 145456.3  | 59885.64  | 120157    | 24323.3   | 136176.8  | 104179.6  | 31383.29  |
| 72468.45  | 188989.7  | 47309.68  | 109623.3  | 56482.27  | 123901.5  | 30063.95  | 107893    | 127564.8  | 29264.52  |
| 71905.93  | 192999.2  | 44527.62  | 109989.2  | 46270.84  | 116180.3  | 22265.43  | 123505.6  | 122377    | 24578.38  |
| 79752.19  | 190370.8  | 54268.49  | 114196.2  | 48615.71  | 113389.6  | 30166.3   | 128119.3  | 130701    | 31869.45  |

|            |            |            |            |            |            |            |            |            |            |
|------------|------------|------------|------------|------------|------------|------------|------------|------------|------------|
| LP226.951` | LP226.951` | LP226.951` | LP226.951` | LP226.951` | LP226.951` | LP226.952` | LP227.127` | LP227.127` | LP227.127` |
| 139821.8   | 196296.7   | 24046.83   | 24912.89   | 17073.94   | 195506.1   | 164614.6   | 76654.17   | 74579.78   | 93062.55   |
| 119845.2   | 192107.5   | 30093.24   | 26231.8    | 17959.26   | 186480.8   | 150057.8   | 79996.49   | 82571.63   | 84859.95   |
| 127742.3   | 176934     | 20491.49   | 23272.77   | 15195.53   | 192682     | 153610.4   | 86251.02   | 78034.55   | 85657.48   |
| 127849.4   | 185941     | 15111.91   | 20152.64   | 11449.2    | 189547.7   | 166181.4   | 85541.77   | 80634.89   | 88777.2    |
| 138974.8   | 189435.4   | 21746.4    | 27157.88   | 14475.23   | 189633.5   | 165228.3   | 87137.98   | 86208.33   | 97674.66   |

|           |           |           |           |           |           |           |           |           |           |
|-----------|-----------|-----------|-----------|-----------|-----------|-----------|-----------|-----------|-----------|
| LP227.127 | LP227.128 | LP227.128 |
| 58474.09  | 91338.83  | 74588.6   | 86266.47  | 81265.82  | 90340.41  | 88548.83  | 92355.32  | 83430.01  | 118476.9  |
| 58655.97  | 95220.19  | 71408.66  | 83517.19  | 78154.5   | 85790.21  | 88864.77  | 130099.6  | 96923.53  | 93360.26  |
| 58571.73  | 93809.17  | 72781.37  | 87730.87  | 84122.36  | 95848.75  | 92802.02  | 107621.2  | 98656.58  | 97068.91  |
| 68076.43  | 97238.31  | 82440.96  | 91370.65  | 98075.42  | 98916.42  | 93763.96  | 106645.9  | 117209.5  | 94506.67  |
| 63493.3   | 83249.63  | 79074.76  | 76849.54  | 84146.89  | 86114.53  | 90423.52  | 142210.7  | 84417.1   | 134415.1  |

|           |           |           |           |           |           |           |           |           |           |
|-----------|-----------|-----------|-----------|-----------|-----------|-----------|-----------|-----------|-----------|
| LP227.128 | LP227.128 | LP227.127 | LP227.127 | LP227.128 | LP227.128 | LP227.128 | LP227.128 | LP227.128 | LP227.128 |
| 129557.7  | 73988.29  | 105792    | 109242.1  | 72830.45  | 96945.41  | 90923.21  | 111664.2  | 103495.4  | 123512.9  |
| 119819.6  | 82756.4   | 93514.92  | 102212.4  | 92333.77  | 87311.22  | 71370.15  | 89065.84  | 94879.51  | 108919.2  |
| 123470.7  | 74599.04  | 86778.05  | 101200.1  | 102272.3  | 90505.98  | 66414.76  | 92469.94  | 97759.12  | 105676.9  |
| 162927.5  | 82252.7   | 105921.7  | 85466.16  | 102050.1  | 81422.19  | 88715.81  | 80124.16  | 112940    | 163690.4  |
| 107960.7  | 89405.38  | 93101.85  | 108537.7  | 102314.8  | 78867.7   | 65231.03  | 101289.2  | 102662.6  | 106237.8  |

|           |           |           |           |           |           |           |           |           |           |
|-----------|-----------|-----------|-----------|-----------|-----------|-----------|-----------|-----------|-----------|
| LP227.127 | LP227.127 | LP227.127 | LP227.128 | LP227.128 | LP227.127 | LP227.127 | LP227.127 | LP227.128 | LP227.128 |
| 74036.57  | 77654     | 67428.93  | 121524.3  | 92391.38  | 95185.69  | 93930.2   | 91069.25  | 87782.48  | 109310.6  |
| 67970.12  | 92438.76  | 68207.74  | 122676.4  | 98621.88  | 98889.02  | 98434.8   | 80779.51  | 92672.63  | 110151.5  |
| 65408.01  | 89828.81  | 65685.18  | 114346.5  | 101657.1  | 97119.71  | 98869.94  | 86476.82  | 86659.97  | 103636.9  |
| 77939.47  | 92146.02  | 96862.94  | 77392.19  | 100425.9  | 118582    | 93684.49  | 85411.01  | 94228.1   | 123800.6  |
| 74078.72  | 97736.1   | 68948.25  | 129482    | 101924.4  | 89219.34  | 101860.5  | 96914.34  | 90192.33  | 99098.65  |

|           |           |           |           |           |           |           |           |           |           |
|-----------|-----------|-----------|-----------|-----------|-----------|-----------|-----------|-----------|-----------|
| LP227.127 | LP227.127 | LP227.128 | LP227.128 | LP227.128 | LP227.128 | LP227.127 | LP227.127 | LP227.128 | LP227.128 |
| 96972.58  | 108931.6  | 85593.18  | 81735.02  | 79286.41  | 77004.62  | 92772.58  | 182419.7  | 87731.19  | 113367.9  |
| 92392     | 103606.5  | 87806.73  | 90409.61  | 85197.42  | 70300.21  | 92657.03  | 182041.1  | 91458.45  | 109024.5  |
| 95179.36  | 109111.7  | 95251.61  | 88454.02  | 80573.37  | 64596.54  | 90686.15  | 181166    | 90464.41  | 112209.8  |
| 101561.5  | 120056.8  | 91410.17  | 95268.22  | 92926.14  | 82133.84  | 102273.3  | 192191.7  | 93595.69  | 116028.8  |
| 95432.12  | 104144.9  | 86463.98  | 96309.85  | 86788.02  | 73821.53  | 96495.15  | 187900.5  | 95630.2   | 113313.8  |



|            |           |           |            |           |           |           |           |           |           |
|------------|-----------|-----------|------------|-----------|-----------|-----------|-----------|-----------|-----------|
| LP227.127! | LP227.128 | LP227.128 | LP227.127! | LP227.128 | LP227.146 | LP227.146 | LP227.146 | LP227.146 | LP227.146 |
| 133368.8   | 84833.25  | 113858.5  | 89807.27   | 122695.5  | 90527.66  | 89631.34  | 92855.93  | 75074.58  | 100678.8  |
| 139688.9   | 78676.76  | 100870.7  | 81995.25   | 95640.56  | 86207.93  | 83246.36  | 81125.12  | 71155.67  | 102267.4  |
| 144105.8   | 81610.08  | 107852.4  | 83428.05   | 97073.16  | 88606.53  | 87045.53  | 83016.68  | 79761.24  | 109799.1  |
| 138568.3   | 86947.34  | 84416.76  | 69154.35   | 71716.5   | 90714.77  | 86303.19  | 82550.69  | 76460.21  | 102590.5  |
| 147998.9   | 84846.32  | 103147.2  | 78206.35   | 110249.5  | 76949.29  | 77722.73  | 60868.42  | 88584.37  | 95863.8   |

|           |           |           |           |           |           |           |           |           |           |
|-----------|-----------|-----------|-----------|-----------|-----------|-----------|-----------|-----------|-----------|
| LP227.146 | LP227.147 | LP227.146 | LP227.146 | LP227.146 | LP227.146 | LP227.147 | LP227.146 | LP227.147 | LP227.147 |
| 84626.07  | 119299.4  | 72198.07  | 75523.67  | 89913.31  | 63657.95  | 117916.3  | 72543.17  | 96891.5   | 77860.36  |
| 83437.51  | 123192.2  | 80214.64  | 76446.69  | 88260.76  | 60390.33  | 117380.4  | 79034.17  | 94858.82  | 76808.19  |
| 86175.79  | 108984.6  | 69705.2   | 78329.51  | 84322.57  | 65824.75  | 115218.3  | 68593.92  | 103309.7  | 74026.52  |
| 78358.36  | 125158.6  | 74134.03  | 79381.69  | 93328.61  | 71190.05  | 121563.8  | 75186.01  | 86317.01  | 82583.74  |
| 73201.33  | 108292.3  | 68378.58  | 87700.62  | 57710.41  | 66976.55  | 86566.44  | 69891.94  | 83018.11  | 77313.74  |

|           |           |           |           |           |           |           |           |           |           |
|-----------|-----------|-----------|-----------|-----------|-----------|-----------|-----------|-----------|-----------|
| LP227.146 | LP227.146 | LP227.147 | LP227.147 | LP227.146 | LP227.147 | LP227.146 | LP227.147 | LP227.147 | LP227.146 |
| 70786.24  | 98873.04  | 91944.59  | 63393.93  | 109605.1  | 88897.52  | 92572.14  | 95579.4   | 72600.49  | 91149.15  |
| 79409.85  | 106599.2  | 87970.24  | 57872.22  | 107392.8  | 81694.33  | 84018.67  | 99380.3   | 73578.96  | 93946.2   |
| 87072.07  | 116134.7  | 92865.67  | 70173.71  | 102249.3  | 86702.22  | 85687.45  | 105487.7  | 73905.19  | 93903.52  |
| 85426.83  | 105273.1  | 92864.09  | 70435.29  | 106916.4  | 85897.7   | 89150.59  | 106188.5  | 69125.68  | 92813.39  |
| 53857.02  | 113084.4  | 98858.21  | 57724.42  | 101547.1  | 76795.76  | 76450.6   | 89148.26  | 62682.33  | 79824.17  |

|           |           |           |           |           |           |           |           |           |           |
|-----------|-----------|-----------|-----------|-----------|-----------|-----------|-----------|-----------|-----------|
| LP227.146 | LP227.164 | LP227.200 | LP227.200 |
| 69783.56  | 75016.11  | 67454.5   | 58559.6   | 137767.4  | 112992.3  | 52148.28  | 94692.13  | 106286.2  | 58803.07  |
| 67896.02  | 59696.57  | 70320.73  | 66338.95  | 136920.7  | 117390.2  | 41744.1   | 99877.8   | 66856.34  | 63043.21  |
| 67403.59  | 68118.11  | 74667.19  | 58519.93  | 144325.9  | 120054.8  | 38631.76  | 94997.8   | 63700.19  | 64186.87  |
| 70083.82  | 70058.74  | 65763.73  | 49164.84  | 155545.5  | 117631.3  | 49320.29  | 98112.13  | 56613.94  | 65840.3   |
| 65852.7   | 73349.86  | 76265.56  | 67414.21  | 158320.6  | 125453.6  | 46622.45  | 98031.79  | 79235.35  | 69859.29  |

|           |           |           |           |           |           |           |           |           |           |
|-----------|-----------|-----------|-----------|-----------|-----------|-----------|-----------|-----------|-----------|
| LP227.200 | LP227.200 | LP227.201 | LP227.200 | LP227.201 | LP227.200 | LP227.200 | LP227.200 | LP227.200 | LP227.200 |
| 72730.71  | 78488.19  | 66658.88  | 75220.64  | 90895.55  | 85062.64  | 100448.2  | 70654.07  | 75608.69  | 75495.64  |
| 82176.6   | 74154.35  | 66296.9   | 73352.05  | 75468.09  | 72715.06  | 84026.51  | 75643.47  | 82398.97  | 61622.02  |
| 77011.47  | 74792.93  | 63007.09  | 75045.44  | 85376.75  | 69578.47  | 88313.28  | 82603.35  | 76489.66  | 68785.01  |
| 77680.25  | 75172.38  | 65835.1   | 76328.38  | 90144.46  | 81573.04  | 89578.74  | 82417.71  | 73335.69  | 75816.26  |
| 82207.01  | 80831.97  | 72198.43  | 73736.51  | 93181.26  | 86181.79  | 87779.54  | 78899.26  | 75026.31  | 65965.83  |

|           |           |           |           |           |           |           |           |           |           |
|-----------|-----------|-----------|-----------|-----------|-----------|-----------|-----------|-----------|-----------|
| LP227.200 | LP227.200 | LP227.200 | LP227.200 | LP227.201 | LP227.200 | LP227.201 | LP227.200 | LP227.200 | LP227.200 |
| 85911.61  | 80682.33  | 95845.72  | 89339.16  | 74266.14  | 90461.83  | 59785.87  | 79537.41  | 60729.77  | 80584.74  |
| 88740.71  | 82309.92  | 95891.55  | 86021.28  | 76325.52  | 84705.73  | 67739.87  | 88090.13  | 54361.41  | 75762.64  |
| 89176.16  | 78181.16  | 103383.9  | 87366.52  | 72738.55  | 80227.13  | 61770.46  | 85785.53  | 53647.85  | 84271.87  |
| 87950.21  | 81672.29  | 95287.1   | 84908.85  | 81017.59  | 83991.76  | 68696.84  | 85305.47  | 58423.08  | 76794.06  |
| 94623.84  | 76439.51  | 101794.3  | 88476.22  | 84221.87  | 93658.48  | 73606.61  | 84215.28  | 56508.52  | 85952.38  |

|           |           |           |           |           |           |           |           |           |           |
|-----------|-----------|-----------|-----------|-----------|-----------|-----------|-----------|-----------|-----------|
| LP227.200 | LP227.201 | LP227.200 |
| 51817.62  | 61914.93  | 66770.18  | 85967.02  | 54108.17  | 36108.22  | 84648.57  | 66009.46  | 42207.17  | 118534.2  |
| 49787.15  | 51451.12  | 73257.22  | 78979.07  | 50467.77  | 35021.13  | 84703.7   | 66526.26  | 49650.97  | 104648.4  |
| 50904.44  | 56149.49  | 68002.51  | 89338.57  | 53902.26  | 39483.96  | 85196.41  | 61620.24  | 47608.82  | 104253.1  |
| 51089.47  | 59399.04  | 75318.51  | 84972.85  | 55067.36  | 39511.04  | 82434.42  | 62422.11  | 47629.72  | 120074.6  |
| 55404.56  | 60889.32  | 73162.29  | 96889.18  | 55630.87  | 39382.73  | 97564.45  | 72298.93  | 57523.51  | 127859.9  |

|           |           |           |           |           |           |           |           |           |           |
|-----------|-----------|-----------|-----------|-----------|-----------|-----------|-----------|-----------|-----------|
| LP227.200 | LP227.200 | LP227.200 | LP227.201 | LP227.200 | LP227.200 | LP227.200 | LP227.200 | LP227.200 | LP227.200 |
| 58322.03  | 89534.22  | 57449.61  | 58538.4   | 52509.81  | 65920.76  | 51573.68  | 38166.67  | 56133.83  | 75758.01  |
| 63302.7   | 86864.12  | 56856.79  | 56270.09  | 48178.1   | 72804.42  | 51164.28  | 41265.49  | 49630.64  | 74557.5   |
| 65365.45  | 94313.67  | 62519.15  | 57338.39  | 54402.74  | 73560.39  | 49315.72  | 41417.92  | 54828.11  | 85339.56  |
| 63854.86  | 84789.33  | 61247.21  | 54032.27  | 57157.43  | 65347.14  | 54918.44  | 40933.19  | 53518.31  | 80554.54  |
| 73397.96  | 92750.12  | 61584.92  | 60027.64  | 52854.74  | 69633.87  | 50002.91  | 42558.85  | 57151.21  | 85323.98  |



|           |           |           |           |           |           |           |           |           |           |
|-----------|-----------|-----------|-----------|-----------|-----------|-----------|-----------|-----------|-----------|
| LP227.200 | LP227.201 | LP227.200 | LP227.200 | LP227.200 | LP227.200 | LP227.200 | LP228.105 | LP228.105 | LP228.105 |
| 52440.69  | 55339.29  | 47412.92  | 88858.38  | 52087.8   | 38914.9   | 45157.55  | 399834.6  | 384333.7  | 400977    |
| 50495.74  | 57204.19  | 48257.28  | 83469.88  | 52302.35  | 36761.6   | 45705.65  | 357184.1  | 365403    | 518604    |
| 55817.28  | 50170.55  | 39468.15  | 91571.94  | 50882.57  | 36389.39  | 48518.66  | 377495.4  | 319954.8  | 467192.1  |
| 55181.66  | 56983.81  | 42257.63  | 89598.25  | 54052.01  | 36348.64  | 45588.88  | 402805    | 301775.8  | 493990.7  |
| 57463.32  | 61593.68  | 48097.41  | 92297.71  | 50232.64  | 37827.19  | 52295.77  | 446634.5  | 344713    | 557594.4  |

|           |           |           |           |           |           |           |           |           |           |
|-----------|-----------|-----------|-----------|-----------|-----------|-----------|-----------|-----------|-----------|
| LP228.105 | LP228.105 | LP228.105 | LP228.105 | LP228.105 | LP228.104 | LP228.105 | LP228.104 | LP228.105 | LP228.104 |
| 212790.6  | 349640.3  | 229327.5  | 315422.9  | 95528.82  | 54981.42  | 174745    | 73226.49  | 89212.28  | 83965.42  |
| 287878.1  | 412261.4  | 174032.4  | 221427.1  | 73997.46  | 49352.73  | 158570.4  | 71158.4   | 85520.83  | 76171.22  |
| 293154.3  | 384639.3  | 223601.5  | 209728.1  | 88356.6   | 55944.29  | 129441    | 81361.23  | 86311.67  | 70657.51  |
| 262921.3  | 403005.7  | 161812.2  | 249123.7  | 74874.84  | 64963.5   | 98901.97  | 65993.85  | 67465.05  | 67321.1   |
| 320899.5  | 504685    | 155730.3  | 249694.2  | 80231.3   | 55746.66  | 152501.6  | 70598.94  | 88574.37  | 117240.9  |

|           |           |           |           |           |           |           |           |           |           |
|-----------|-----------|-----------|-----------|-----------|-----------|-----------|-----------|-----------|-----------|
| LP228.105 | LP228.104 | LP228.104 |
| 102370.2  | 175220.3  | 139549.7  | 146834.5  | 132991.9  | 175527.2  | 83071.68  | 149066.2  | 45293.96  | 85772.01  |
| 103793.1  | 174788.8  | 129076.4  | 174789.5  | 122645.1  | 173679.9  | 81624.78  | 136092.1  | 45506.39  | 92190.19  |
| 100071.4  | 180128.9  | 127483.8  | 153970.7  | 125191.3  | 172526    | 80916.8   | 142254.2  | 47212.19  | 93486.45  |
| 97683.6   | 183998.5  | 138228.5  | 157519.9  | 128835.3  | 178323.2  | 87061.12  | 137435.1  | 45429.26  | 91035.27  |
| 106285    | 161160.4  | 133458.4  | 160589    | 147849.5  | 176801.6  | 86403.21  | 173864    | 46808.15  | 92421.08  |

|           |           |           |           |           |           |           |           |           |           |
|-----------|-----------|-----------|-----------|-----------|-----------|-----------|-----------|-----------|-----------|
| LP228.105 | LP228.105 | LP228.159 | LP228.159 | LP228.159 | LP228.159 | LP228.196 | LP228.196 | LP228.232 | LP228.232 |
| 152108    | 118715.4  | 25846.49  | 29145.1   | 31911.12  | 42497.45  | 60029.17  | 26592.84  | 41356.54  | 25703.81  |
| 136399.2  | 123480    | 26263.52  | 32527.85  | 32196.97  | 43019.48  | 60682.98  | 23961.01  | 38793.24  | 26884.77  |
| 124843.9  | 120421.9  | 29487.61  | 31417.32  | 24896.37  | 46484.63  | 58189.28  | 23238.34  | 38813.49  | 27114.07  |
| 123340.5  | 122543.2  | 29115.23  | 34334.17  | 31714.8   | 46247.23  | 55198.15  | 23057.89  | 33726.87  | 27859.04  |
| 141746.8  | 124101.1  | 20353.46  | 23747.32  | 35526.24  | 29576.01  | 59479.82  | 19919.84  | 35949.38  | 33552.75  |

|           |           |           |           |           |           |           |           |           |           |
|-----------|-----------|-----------|-----------|-----------|-----------|-----------|-----------|-----------|-----------|
| LP229.106 | LP229.107 | LP229.108 | LP229.142 | LP229.143 | LP229.143 | LP229.143 | LP229.143 | LP229.143 | LP229.143 |
| 68377.78  | 62556.09  | 46380.29  | 67771.85  | 63514.21  | 49565.6   | 64354.57  | 65075.42  | 72437.08  | 72694.1   |
| 61559.72  | 71667.68  | 50724.69  | 62860.27  | 67026.41  | 58029.6   | 74897.57  | 71991.75  | 50690.57  | 74645.79  |
| 59023.54  | 70757.62  | 47181.96  | 73721.96  | 75003.37  | 53531.39  | 66070.34  | 64943.23  | 65278.67  | 74363.15  |
| 50071.68  | 41509.57  | 47316.11  | 69751.47  | 66160.44  | 59423.56  | 65075.71  | 63676.61  | 51820.52  | 69777.28  |
| 60163.19  | 74682.32  | 46589.38  | 76929.8   | 66117.73  | 66082.05  | 69109.97  | 64280.86  | 43848.09  | 68950.45  |

|           |           |           |           |           |           |           |           |           |           |           |
|-----------|-----------|-----------|-----------|-----------|-----------|-----------|-----------|-----------|-----------|-----------|
| LP229.143 |
| 75731.71  | 61222.47  | 54447.84  | 44142.04  | 45661.79  | 74737.72  | 68450.33  | 59994.75  | 48362.66  | 49604.6   |           |
| 73243.3   | 62316.32  | 56146.53  | 48744     | 49080.1   | 77093.71  | 69364.35  | 60906.84  | 56613.93  | 44413.7   |           |
| 92525.41  | 61951.56  | 62342.41  | 46835.7   | 55720.24  | 108433.2  | 73386.96  | 67475.45  | 50887.74  | 45639.52  |           |
| 72263.69  | 59811.91  | 67890.5   | 44459.63  | 49391.39  | 67294.45  | 70716.45  | 52111.22  | 50433.13  | 53161.57  |           |
| 77827.54  | 63914.67  | 60577.54  | 49725.08  | 68046.52  | 79777.29  | 75828.85  | 59441.19  | 53865.63  | 54066.53  |           |

|           |           |           |           |           |           |           |           |           |           |
|-----------|-----------|-----------|-----------|-----------|-----------|-----------|-----------|-----------|-----------|
| LP229.143 |
| 33574.35  | 58436.07  | 62610.8   | 55027.1   | 68516.84  | 45093.44  | 56204.6   | 67912.24  | 51311.22  | 41755.28  |
| 50035.16  | 61134.62  | 65100.45  | 59252.93  | 64175.94  | 46022.65  | 59920.87  | 68853.01  | 54385.55  | 36637.77  |
| 51398.46  | 76451.97  | 61616.4   | 56991.36  | 68372.14  | 51933.36  | 72374.88  | 65622.03  | 56256.01  | 40422.36  |
| 46806.64  | 67102.09  | 56321.11  | 53412.1   | 63007.11  | 43895.75  | 62365.26  | 59273.45  | 52747.09  | 40953.3   |
| 48313.87  | 62933.5   | 69169.84  | 46551.68  | 69013.61  | 43641.11  | 56085.75  | 62054.49  | 60609.46  | 35816.77  |

|           |           |           |           |           |           |           |           |           |           |
|-----------|-----------|-----------|-----------|-----------|-----------|-----------|-----------|-----------|-----------|
| LP229.143 | LP229.145 | LP229.144 | LP229.143 |
| 34479.26  | 50967.28  | 50643.88  | 49028.09  | 62030.34  | 69440.35  | 47413.03  | 58191.28  | 53714.32  | 72984.63  |
| 32468.22  | 53786.71  | 50538.16  | 55229.26  | 60019.71  | 70601.65  | 47571.74  | 65613.96  | 51984.08  | 70655.26  |
| 34704.76  | 50299.7   | 46892.66  | 55799.13  | 65908.19  | 66254.58  | 46005.26  | 55991.92  | 57936.37  | 69600.49  |
| 36556.8   | 52950.69  | 51882.4   | 54128.15  | 62178.94  | 71142.38  | 51924.63  | 59243.58  | 54402.93  | 65667.14  |
| 40839.87  | 61273.04  | 50898.58  | 49616.86  | 64456.25  | 78306.27  | 49171.22  | 55148.36  | 50969.99  | 64412.45  |



|           |           |           |           |           |           |           |           |           |           |
|-----------|-----------|-----------|-----------|-----------|-----------|-----------|-----------|-----------|-----------|
| LP229.143 | LP229.143 | LP229.144 | LP229.143 | LP229.143 | LP229.144 | LP229.143 | LP229.143 | LP229.143 | LP229.143 |
| 46046.51  | 53493.14  | 33343.68  | 46289.28  | 52422.53  | 73166.31  | 34415.29  | 80274.26  | 48964.27  | 95527.02  |
| 43329.58  | 46206.96  | 36235.02  | 38264.02  | 47146.39  | 65303.76  | 38455.92  | 86314.94  | 50832.55  | 83983.28  |
| 52044.81  | 43611.6   | 35679.72  | 45478.74  | 49381.33  | 66574.59  | 37832.52  | 80405.82  | 52400.47  | 94346.18  |
| 48873.25  | 47952.02  | 33335.15  | 45840.91  | 46148.33  | 71492.12  | 42399.35  | 76263.75  | 52810.23  | 85131.25  |
| 46442.35  | 45483.21  | 30287.23  | 40432.19  | 50514.55  | 63124.13  | 34956.89  | 80778.51  | 47721.1   | 89122.5   |

|           |           |           |           |           |           |           |           |           |           |
|-----------|-----------|-----------|-----------|-----------|-----------|-----------|-----------|-----------|-----------|
| LP229.162 |
| 59952.4   | 83876.46  | 96038.14  | 72424.67  | 60949.31  | 87229.28  | 97697.4   | 90828.06  | 87437.3   | 54912.43  |
| 65308.9   | 78508.11  | 84752.16  | 80704.51  | 69256.14  | 77964.41  | 104842.5  | 82419.19  | 75700.64  | 58778.11  |
| 58683.2   | 80600.81  | 99990.41  | 70128.16  | 75257.11  | 86281.97  | 98601.93  | 98543.06  | 88648.97  | 55038.85  |
| 63876.99  | 84729.54  | 102856.4  | 84251.18  | 70254.35  | 88210.14  | 102727.2  | 98403.74  | 88829.27  | 60228.89  |
| 86645.86  | 115679.5  | 123427.2  | 100772.8  | 93357.7   | 108986.9  | 124790.6  | 120202.9  | 113592    | 83307.84  |

|           |           |           |           |           |           |           |           |           |           |
|-----------|-----------|-----------|-----------|-----------|-----------|-----------|-----------|-----------|-----------|
| LP229.162 | LP229.163 | LP229.162 | LP229.163 |
| 85763.86  | 56770.58  | 68752.93  | 82380.32  | 43463.79  | 85844.58  | 85804.05  | 88231.16  | 53842.9   | 70261.74  |
| 92322.41  | 60785.5   | 63263.05  | 84063.15  | 47765.62  | 86235.76  | 83949.69  | 72534.55  | 58852.39  | 68646.84  |
| 98955.59  | 58594.79  | 64118.38  | 77417.67  | 51718.11  | 91282.5   | 76866.07  | 79176.43  | 59536.38  | 67640.63  |
| 101470.3  | 59906.51  | 72249.64  | 96617.97  | 52513.98  | 87849.64  | 85080.53  | 84076.45  | 60353.13  | 73854.14  |
| 126101.5  | 84008.68  | 100270.7  | 124015.3  | 69882.55  | 109297.8  | 105498.9  | 108599.7  | 77080.64  | 89914.28  |

|            |           |           |           |            |            |            |            |            |            |
|------------|-----------|-----------|-----------|------------|------------|------------|------------|------------|------------|
| LP229.162' | LP229.163 | LP229.163 | LP229.163 | LP229.162' | LP229.162' | LP229.162' | LP229.162' | LP229.162' | LP229.162' |
| 70929.71   | 76210.74  | 54045.88  | 58551.6   | 81527.43   | 78973.65   | 102365.2   | 76062.82   | 60129.05   | 79486.14   |
| 78447.83   | 66594.9   | 50990.92  | 60327.87  | 74736.32   | 82371.74   | 85898.8    | 70108.11   | 59271.72   | 69108.08   |
| 84483.34   | 67566.95  | 57172.04  | 57112.18  | 72256.27   | 87847.4    | 101548.5   | 71156.95   | 60804.75   | 68121.92   |
| 79060.25   | 73255.73  | 58903.66  | 63484.85  | 77348.53   | 89236.8    | 107960.3   | 74409.43   | 64075.99   | 68276.31   |
| 114000     | 88593.59  | 74584.2   | 79502.38  | 98668.51   | 117545.5   | 135493.5   | 86347.22   | 87530.62   | 89085.64   |

|           |           |           |           |           |           |           |           |           |           |
|-----------|-----------|-----------|-----------|-----------|-----------|-----------|-----------|-----------|-----------|
| LP229.163 | LP229.163 | LP229.162 | LP229.163 | LP229.162 | LP229.162 | LP229.162 | LP229.163 | LP229.162 | LP229.163 |
| 81923.11  | 111835.8  | 76464.49  | 88814.29  | 63859.85  | 81705.85  | 131116.3  | 61934.94  | 77482.48  | 60577.96  |
| 80164.06  | 111092.2  | 73092.48  | 93555.4   | 65189.55  | 77210.47  | 126466.5  | 68731.33  | 87896.89  | 60388.47  |
| 83962.15  | 119111.7  | 72233.61  | 91276.2   | 63955.72  | 78617.36  | 122767.6  | 65542.48  | 84898.24  | 69265.71  |
| 90397.54  | 118581.6  | 76264.87  | 93969.05  | 66743.17  | 85787.06  | 140026.7  | 69059.4   | 82748.5   | 61235.28  |
| 109880.2  | 155066.4  | 108087.7  | 119567.5  | 85494.97  | 97387.94  | 167125.3  | 91052.8   | 118240    | 81410.09  |

|           |           |           |           |           |           |           |           |           |           |
|-----------|-----------|-----------|-----------|-----------|-----------|-----------|-----------|-----------|-----------|
| LP229.163 | LP229.18_ | LP229.179 | LP229.199 | LP229.199 | LP230.139 | LP230.210 | LP231.122 | LP231.123 | LP231.122 |
| 61597.13  | 89885.88  | 85575.79  | 51881.64  | 52186.49  | 38722.26  | 18425.86  | 24690.73  | 31205.04  | 37649.86  |
| 57861.53  | 82519.33  | 87607.71  | 51234.41  | 49228.31  | 40446.55  | 15860.33  | 17749.5   | 31142.19  | 46213.5   |
| 62972.11  | 90273.11  | 90752.02  | 50003.91  | 52799.17  | 40659.96  | 28453.05  | 23068.96  | 32162.94  | 38710.15  |
| 62741.66  | 102226.3  | 99505.49  | 56319.95  | 58329.55  | 45972.06  | 19630.05  | 20383.25  | 29606.96  | 39014.97  |
| 79582.06  | 123069.2  | 116413.8  | 69380.17  | 68950.31  | 37797.82  | 18934.85  | 19161.92  | 29913.24  | 43385.45  |

|           |           |           |           |           |           |           |           |           |           |
|-----------|-----------|-----------|-----------|-----------|-----------|-----------|-----------|-----------|-----------|
| LP231.177 | LP231.177 | LP231.177 | LP231.175 | LP231.178 | LP231.178 | LP231.178 | LP231.178 | LP231.178 | LP231.178 |
| 67546.94  | 101618.3  | 49814.29  | 55495.13  | 44796.66  | 56179.38  | 53684.74  | 52537.29  | 51191.85  | 56201.57  |
| 68356.87  | 95022.85  | 49950.64  | 48276.86  | 47656.24  | 49728.79  | 46896.16  | 62880.99  | 49100.32  | 52605.32  |
| 66800.12  | 94377.13  | 51311.7   | 53880.52  | 51217.01  | 43903.06  | 42477.58  | 68580.76  | 50940.72  | 57472.89  |
| 80824.75  | 106489.1  | 59688.68  | 52850.66  | 47111     | 48641.86  | 49029.99  | 66524.16  | 55940.37  | 62201.91  |
| 107182.1  | 126854.6  | 70698.25  | 76681.34  | 65424.46  | 94007.87  | 108356.8  | 83927.95  | 60195.57  | 89999.67  |

|           |           |           |           |           |           |           |           |           |           |
|-----------|-----------|-----------|-----------|-----------|-----------|-----------|-----------|-----------|-----------|
| LP231.178 |
| 45483     | 62896.82  | 61460.4   | 56332.5   | 56226.94  | 65933.3   | 61588.72  | 71883.98  | 55780.98  | 57593.84  |
| 47448.77  | 58866.69  | 61314.67  | 48492.68  | 54453.5   | 66562.14  | 66290.3   | 58727.77  | 53317.47  | 56526.69  |
| 42032.43  | 63756.78  | 58651.51  | 53416.99  | 56089.4   | 66182.02  | 67098.92  | 62881.92  | 55093.37  | 64810.98  |
| 49798.78  | 65398.04  | 64335.52  | 58452.86  | 60542.83  | 75404.22  | 69973.79  | 65339.25  | 55309.03  | 63966.71  |
| 60106.77  | 106141.5  | 71636.06  | 64838.04  | 76599.98  | 77608.09  | 73291.39  | 78944.8   | 75299.96  | 86726.23  |



|           |           |           |           |           |           |           |           |           |           |
|-----------|-----------|-----------|-----------|-----------|-----------|-----------|-----------|-----------|-----------|
| LP231.178 | LP231.178 | LP231.178 | LP231.177 | LP231.178 | LP231.178 | LP231.178 | LP231.178 | LP231.178 | LP231.178 |
| 52413.03  | 84907.66  | 57175.64  | 46859.04  | 45513.04  | 40735.7   | 57829.05  | 46661.59  | 49125.34  | 52222.79  |
| 60628.89  | 84649.75  | 61005.06  | 48652.87  | 41300.94  | 49367.34  | 56212.43  | 50022.87  | 52603.47  | 49304.53  |
| 60211.2   | 85008.61  | 63519.73  | 49931.8   | 48278.64  | 48987.53  | 62767.93  | 54047.08  | 62873.85  | 51724.55  |
| 58223.89  | 95804.21  | 66608.35  | 57803.51  | 47431.5   | 49061.55  | 65852.95  | 55612.4   | 64831.65  | 58620.86  |
| 98941.36  | 112829.5  | 92612.02  | 72566.95  | 63972.75  | 66790.44  | 81781.65  | 66844.89  | 75295.25  | 74436.41  |

|           |           |           |           |           |           |           |           |           |           |
|-----------|-----------|-----------|-----------|-----------|-----------|-----------|-----------|-----------|-----------|
| LP231.178 | LP231.178 | LP231.179 | LP231.178 | LP231.178 | LP231.178 | LP231.178 | LP231.177 | LP231.178 | LP231.178 |
| 51398     | 59738.09  | 40677.03  | 71371.39  | 59769.77  | 69253.13  | 44083.72  | 43219.85  | 44440.03  | 69673.67  |
| 46720.9   | 55745.32  | 43464.37  | 70738.36  | 61822.33  | 63194.45  | 43468.07  | 42811.14  | 42196.08  | 71578.68  |
| 49474.63  | 59661.33  | 50112.56  | 66954.82  | 59535.38  | 70843.67  | 44458.97  | 44450.39  | 41575.37  | 73282.01  |
| 55695.12  | 65078.52  | 47376.21  | 69280.54  | 57867.55  | 74299.54  | 50014.98  | 46489.42  | 54316.26  | 79112.2   |
| 73720.36  | 80833.5   | 55377.28  | 90982.88  | 81030.42  | 91120.04  | 58217.22  | 62798.36  | 58201.68  | 92230.94  |

|           |           |           |           |           |           |          |           |           |           |
|-----------|-----------|-----------|-----------|-----------|-----------|----------|-----------|-----------|-----------|
| LP231.178 | LP232.153 | LP233.153 | LP233.154 | LP233.153 | LP233.153 | LP233.19 | LP233.190 | LP233.226 | LP233.226 |
| 47720     | 27623.21  | 29405.45  | 24663.76  | 31911.46  | 37573.91  | 36889.57 | 29485.02  | 31102.26  | 28770.08  |
| 44505.41  | 26728.99  | 27962.44  | 26376.84  | 36252.94  | 34988.42  | 35870.2  | 31485.8   | 21647.75  | 21627.17  |
| 49612.88  | 24943.79  | 25586.42  | 26791.69  | 38633.22  | 41190.97  | 31938.29 | 22990.56  | 37469.85  | 32485.27  |
| 50958.04  | 27944.07  | 27406.18  | 25234.39  | 38084.4   | 41786.53  | 41955.18 | 26743.35  | 37104.83  | 32077.13  |
| 66198.37  | 25243.88  | 26300.41  | 25600.55  | 34791.24  | 35034.84  | 37230.68 | 29840.57  | 30156.9   | 35979.75  |

|           |           |           |           |           |           |           |           |           |           |
|-----------|-----------|-----------|-----------|-----------|-----------|-----------|-----------|-----------|-----------|
| LP233.226 | LP233.226 | LP235.132 | LP235.132 | LP235.132 | LP235.133 | LP235.133 | LP235.133 | LP235.132 | LP235.133 |
| 27215.84  | 27732.71  | 49036.06  | 45454.16  | 65418.78  | 62776.79  | 57735.07  | 37238.47  | 45600.4   | 28260.72  |
| 23378.07  | 29149.58  | 47010.5   | 44220.55  | 38596.25  | 56892.15  | 59834.62  | 46755.6   | 45490.39  | 31507.58  |
| 25274.8   | 34294.73  | 46781.94  | 48386.08  | 58646.46  | 77161.48  | 57395.71  | 43579.49  | 53126.08  | 35919.79  |
| 23626.57  | 31040     | 43456.44  | 39274.68  | 47106.08  | 57596.37  | 58479.32  | 46323.01  | 40998.2   | 32383.71  |
| 29643.86  | 27965.62  | 46265.02  | 44639.55  | 42944.38  | 63268.97  | 57228.16  | 49130.03  | 47179.54  | 34435.99  |

|            |           |           |           |            |           |           |            |            |           |
|------------|-----------|-----------|-----------|------------|-----------|-----------|------------|------------|-----------|
| LP235.132! | LP235.133 | LP235.133 | LP235.133 | LP235.132! | LP235.133 | LP235.133 | LP235.132! | LP235.132! | LP235.133 |
| 34429.08   | 44539.78  | 27437.22  | 31766.64  | 49303.72   | 34672.31  | 31048.83  | 49563.16   | 42428.75   | 38167.14  |
| 34557.06   | 36501.48  | 24962.96  | 36950.43  | 49945.28   | 30030.81  | 31278.63  | 52226.57   | 42653.05   | 34039.45  |
| 32145.67   | 40399.76  | 33564.66  | 36374.64  | 50039.68   | 36818.17  | 30095.34  | 55652.54   | 43828.09   | 34843.96  |
| 29643.46   | 42138.38  | 28260.86  | 33492.48  | 50987.28   | 32698.26  | 31088.04  | 50244.08   | 44437.25   | 32883.66  |
| 34129.32   | 43173.47  | 30544.12  | 35118.54  | 49266.75   | 31425.96  | 28325.1   | 53249.62   | 39557.17   | 33873.07  |

|           |           |           |           |           |           |           |           |           |           |
|-----------|-----------|-----------|-----------|-----------|-----------|-----------|-----------|-----------|-----------|
| LP235.133 | LP235.132 | LP235.132 | LP235.132 | LP235.132 | LP235.133 | LP235.132 | LP235.133 | LP235.133 | LP235.133 |
| 38729.67  | 47567.05  | 48364.77  | 36184.81  | 44310.64  | 34794.05  | 48508.51  | 43518.59  | 31712.73  | 33947.75  |
| 36874.92  | 44132.84  | 42994.66  | 37579.95  | 46277.25  | 36981.53  | 43012.26  | 40489.55  | 31465.29  | 33249.91  |
| 43370.97  | 38548.8   | 49989.38  | 41697.31  | 43780.84  | 40818.9   | 49241.32  | 45425.86  | 31466.75  | 39139.87  |
| 37911.41  | 46811.05  | 49702.67  | 37471.19  | 46185.92  | 40311.52  | 42432.4   | 33302     | 34760.77  | 34102.49  |
| 36070.72  | 44631.37  | 43227.12  | 36129.45  | 47261.38  | 35113.56  | 41584.97  | 39487.38  | 35065.61  | 32837.89  |

|           |           |           |           |           |           |           |           |           |           |
|-----------|-----------|-----------|-----------|-----------|-----------|-----------|-----------|-----------|-----------|
| LP235.132 | LP235.169 |
| 26518.95  | 148156.9  | 129766.3  | 149003.5  | 133698.1  | 202965.8  | 211980.5  | 151434    | 169662.6  | 181231.4  |
| 28987.98  | 140841.8  | 114843    | 138519.7  | 136614.6  | 200060.5  | 194436.1  | 139312.4  | 174360.7  | 166228.5  |
| 29814.83  | 149040.9  | 119310.9  | 141318.4  | 141849.2  | 204428.4  | 215057    | 142093.2  | 172200.7  | 181888.9  |
| 32127.13  | 144412    | 127768.5  | 152805.9  | 148701    | 213824    | 230307.4  | 149784.4  | 192615.3  | 172951.4  |
| 28748.11  | 181126    | 168326.3  | 167284.9  | 176229.4  | 263948    | 261726.7  | 184420.1  | 227799.9  | 228798.8  |

|           |           |           |           |           |           |           |           |           |           |
|-----------|-----------|-----------|-----------|-----------|-----------|-----------|-----------|-----------|-----------|
| LP235.169 |
| 135165.2  | 133146.5  | 114518.3  | 165498.1  | 159092.8  | 117299.8  | 118638    | 171985.7  | 136338.7  | 142988.5  |
| 129773.4  | 123533.1  | 110285.9  | 163113.6  | 148722.4  | 104909.1  | 136501.2  | 173473.7  | 137548.7  | 143524.6  |
| 131419.4  | 139176.1  | 119717.6  | 174751.6  | 152955.1  | 113562.8  | 136439.3  | 182529.9  | 147492.9  | 137214    |
| 143951.5  | 140186.9  | 123915.2  | 189031.3  | 174336.6  | 121736.1  | 136654.3  | 199514.6  | 152589.5  | 151276.6  |
| 165960.3  | 183293.5  | 162209    | 220304.3  | 214553.9  | 165424.6  | 159214.2  | 223048.8  | 176382.4  | 171295    |



|           |           |           |           |           |           |           |           |           |           |
|-----------|-----------|-----------|-----------|-----------|-----------|-----------|-----------|-----------|-----------|
| LP235.169 | LP235.205 | LP235.205 | LP236.072 |
| 122603.3  | 158067.4  | 156219.2  | 173072.5  | 173286.6  | 186291.1  | 193122.8  | 39828.2   | 46758.16  | 43578.77  |
| 134403.2  | 185778.8  | 154036.6  | 162022    | 176720    | 195164.3  | 193677    | 128582.2  | 169008.4  | 46961.86  |
| 143687.2  | 190640.2  | 156795.3  | 180732.2  | 187177.3  | 195805.4  | 213016.4  | 135592    | 165338.7  | 14148.49  |
| 143245.4  | 191215.1  | 170680.7  | 190060.8  | 202909.8  | 212930.1  | 227199.1  | 142391.7  | 168388.1  | 47256.74  |
| 172669.2  | 216577.5  | 183638    | 220637.9  | 219663.6  | 257205.1  | 272352.8  | 162856.3  | 218009.2  | 51105.52  |

|           |           |           |           |           |           |           |           |           |           |
|-----------|-----------|-----------|-----------|-----------|-----------|-----------|-----------|-----------|-----------|
| LP236.112 | LP236.112 | LP236.112 | LP236.112 | LP236.112 | LP236.112 | LP236.113 | LP236.113 | LP236.113 | LP236.113 |
| 65667.64  | 70363.65  | 75558.73  | 65800.11  | 50977.81  | 43526.4   | 77617.97  | 131967.5  | 92438.91  | 70932.51  |
| 65252.78  | 69823.11  | 83823.63  | 68239.4   | 53532.05  | 39306.42  | 82505.85  | 94206.26  | 93355.1   | 76561.63  |
| 65358.37  | 72906.92  | 77237.6   | 62910.46  | 48081.49  | 48349.07  | 106955.6  | 93789.1   | 93565.25  | 77997.9   |
| 67914.07  | 80769.17  | 89695.07  | 66745.91  | 55901.1   | 43629.24  | 78611.55  | 102253    | 105482.2  | 116535.5  |
| 64952.86  | 71008.92  | 88218.98  | 77672.39  | 52635.46  | 45717.62  | 101691.8  | 84340.85  | 68593.56  | 82857.32  |

|           |           |           |           |           |           |           |           |           |           |
|-----------|-----------|-----------|-----------|-----------|-----------|-----------|-----------|-----------|-----------|
| LP236.113 |
| 56523.1   | 79726.66  | 82993.37  | 72972.64  | 68329.14  | 73230.63  | 72100.78  | 82768.52  | 59909.66  | 66217.45  |
| 73164.87  | 74472.94  | 75984.44  | 73338.87  | 68778.38  | 69762.34  | 68117.06  | 90863.05  | 60333.55  | 58310.73  |
| 92972.24  | 103724.3  | 89681.85  | 87527.99  | 71781.55  | 67278.95  | 55475.98  | 89270.66  | 62153.2   | 69765.25  |
| 66820.7   | 76320.96  | 87220.16  | 80089.05  | 69639.88  | 69706.07  | 73080.58  | 95904.84  | 58131.69  | 62584.73  |
| 110299    | 67978.57  | 104582.7  | 78504.04  | 96526.47  | 73716.86  | 68709.95  | 92532.09  | 74371.76  | 61888.22  |

|           |           |           |           |           |           |           |           |           |           |
|-----------|-----------|-----------|-----------|-----------|-----------|-----------|-----------|-----------|-----------|
| LP236.113 |
| 56552.75  | 54411.46  | 79387.33  | 66901.9   | 67186.34  | 62416.15  | 57628.15  | 80199.64  | 79725.05  | 84785.65  |
| 64440.97  | 58705.01  | 69811.54  | 69479.14  | 64403.93  | 56697.8   | 64071.43  | 77285.78  | 74806.88  | 79734.14  |
| 57779.43  | 64413.44  | 72792.76  | 63064.03  | 62405.31  | 62666.77  | 63884.36  | 79806.21  | 71629.46  | 81362.07  |
| 68498.32  | 61430.52  | 109462    | 64123.83  | 71246.56  | 61906.29  | 66356.54  | 72891.83  | 79731.34  | 86955.2   |
| 76823.61  | 77789.51  | 82942.52  | 88539.34  | 77796.99  | 67423.44  | 77740.49  | 100984.9  | 106106.5  | 106796.6  |

|           |           |           |           |           |           |           |           |           |           |
|-----------|-----------|-----------|-----------|-----------|-----------|-----------|-----------|-----------|-----------|
| LP236.113 |
| 62082.14  | 65250.3   | 85445.03  | 58629.22  | 70107.26  | 59886.13  | 87496.73  | 42657.63  | 38841.36  | 39957.25  |
| 67934.02  | 65218.68  | 79380.54  | 55888.27  | 73993.58  | 59154.51  | 88984.91  | 38485.97  | 42709.13  | 40879.94  |
| 65171.8   | 65847.11  | 81164.06  | 60630.67  | 72935.44  | 56593.94  | 89943.45  | 44824.52  | 39724.33  | 40663.43  |
| 65689.21  | 64008.79  | 80672.68  | 62602.73  | 81262.85  | 63161.84  | 82808.64  | 45771.3   | 40939.91  | 34119.92  |
| 64289.43  | 66456.99  | 85390.93  | 59491.13  | 73502.6   | 58510.52  | 82743.74  | 43391.78  | 34405.38  | 40664.48  |

|           |           |           |           |           |           |           |           |           |           |
|-----------|-----------|-----------|-----------|-----------|-----------|-----------|-----------|-----------|-----------|
| LP236.112 | LP236.113 | LP236.113 | LP236.113 | LP236.113 | LP236.113 | LP236.113 | LP236.172 | LP236.170 | LP236.173 |
| 80774.34  | 62314.2   | 63013.96  | 79310.03  | 93018.26  | 75617.29  | 75920.64  | 21511.47  | 20560.19  | 23031.39  |
| 75187.24  | 61374.64  | 63572.05  | 72710.31  | 92481.12  | 73555.22  | 73908.28  | 27019.9   | 20026.27  | 20307.45  |
| 79433.55  | 65021.07  | 63761.69  | 68031.04  | 115847.2  | 114073.4  | 74050.79  | 22961.58  | 20276.51  | 22596.62  |
| 84070.81  | 67390.54  | 66221.42  | 79424.37  | 107434.6  | 74991.66  | 141746.6  | 25991.04  | 18035.93  | 26012.98  |
| 84943.44  | 67891.41  | 63834.59  | 74475.17  | 86569.25  | 83010.26  | 54401.17  | 30336.04  | 19272.68  | 28396.79  |

|           |           |           |           |           |           |           |           |           |           |
|-----------|-----------|-----------|-----------|-----------|-----------|-----------|-----------|-----------|-----------|
| LP236.173 | LP236.172 | LP236.172 | LP236.907 |
| 29928.5   | 27588.5   | 18005.6   | 60972.96  | 48004.48  | 52923.53  | 46898.21  | 46753.74  | 46921.98  | 50912.55  |
| 28453.04  | 21365.87  | 19127.96  | 59761.41  | 43749.99  | 53595.05  | 48043.36  | 50130.61  | 44623.09  | 43242.98  |
| 31660.24  | 23406.91  | 20616.62  | 76164.76  | 60136.38  | 66751.32  | 62266.9   | 57798.06  | 56456.14  | 54372.37  |
| 27807.82  | 30406.66  | 19688.74  | 78406.85  | 60595.31  | 77722.3   | 59301.47  | 69169.81  | 64275.17  | 62962.68  |
| 38765.04  | 31748.53  | 29482.3   | 56742.08  | 41563.66  | 55203.99  | 46338.76  | 50384.04  | 41672.78  | 42933.01  |

|           |           |           |           |           |           |           |           |           |           |
|-----------|-----------|-----------|-----------|-----------|-----------|-----------|-----------|-----------|-----------|
| LP236.907 | LP236.906 | LP236.907 | LP236.906 | LP236.906 | LP236.906 | LP236.906 | LP236.906 | LP236.907 | LP236.906 |
| 66874.43  | 47557.73  | 60348.65  | 73404.01  | 55444.2   | 51294.99  | 58981.7   | 46927.63  | 39952.48  | 30964.7   |
| 55328.53  | 43586.75  | 59129.94  | 65434.7   | 54064.49  | 45016.2   | 57823.95  | 44468.05  | 37058.6   | 19775.4   |
| 73203.14  | 64855     | 74634.66  | 83121.11  | 68586.78  | 55587.07  | 68344.18  | 48036.21  | 51290.12  | 29417.53  |
| 78714.21  | 63670.09  | 92182.7   | 97168.83  | 70898.67  | 68803.05  | 82173.12  | 66001.87  | 60034.84  | 29169.33  |
| 54224.89  | 43844.99  | 61447.49  | 68133.5   | 52484.02  | 47469.59  | 54072.23  | 43402.21  | 41449.69  | 21494.29  |



|           |           |           |           |           |           |           |           |           |           |           |
|-----------|-----------|-----------|-----------|-----------|-----------|-----------|-----------|-----------|-----------|-----------|
| LP237.148 | LP237.148 | LP237.148 | LP237.149 | LP237.148 |
| 126696    | 86627.62  | 80499.27  | 97783.99  | 67696.76  | 72125.28  | 71891.21  | 59219.58  | 70592.16  | 78800.4   |           |
| 125116.5  | 93730.62  | 79230.99  | 97691.9   | 66835.28  | 80845.76  | 75845.57  | 54898.94  | 67574.46  | 81082.15  |           |
| 117432.9  | 92196.44  | 80678.97  | 109094.5  | 66272.36  | 73202.31  | 72967.01  | 59121.69  | 74823.72  | 77646.81  |           |
| 131433.5  | 95517.76  | 70991.19  | 102590.8  | 68525.4   | 73268.62  | 72688.79  | 53676.38  | 69462.39  | 71017.72  |           |
| 131003.2  | 86338.65  | 76807.99  | 103944.6  | 63241.54  | 73964.46  | 76466.73  | 61538.85  | 69685.77  | 77284.05  |           |

|           |           |           |           |           |           |           |           |           |           |
|-----------|-----------|-----------|-----------|-----------|-----------|-----------|-----------|-----------|-----------|
| LP237.148 | LP237.149 | LP237.149 | LP237.149 | LP237.149 | LP237.148 | LP237.148 | LP237.149 | LP237.148 | LP237.149 |
| 75519.86  | 94242.82  | 82100.97  | 75717.65  | 82666.42  | 62132.69  | 76202.23  | 87965.64  | 69559.31  | 83422.02  |
| 69679.52  | 90628.95  | 80981.33  | 73295.37  | 84499.65  | 68630.62  | 76431.87  | 82660.28  | 62900.1   | 80520.9   |
| 69126.37  | 102647.3  | 81595.64  | 74730.37  | 81579.11  | 61382.4   | 76871.53  | 86377.43  | 60586.07  | 74559.44  |
| 79532.76  | 104325.2  | 78555.4   | 74167.14  | 86301.01  | 60016.28  | 76109     | 84066.78  | 60527.52  | 82077.18  |
| 78134.44  | 115744.7  | 87423.89  | 77072.88  | 89867.14  | 70535.5   | 82751.97  | 85465.31  | 71231.79  | 86432.34  |

|           |           |           |           |           |           |           |           |           |           |
|-----------|-----------|-----------|-----------|-----------|-----------|-----------|-----------|-----------|-----------|
| LP237.149 | LP237.148 | LP237.148 | LP237.148 | LP237.148 | LP237.148 | LP237.148 | LP237.185 | LP237.185 | LP237.185 |
| 72015.34  | 76871.63  | 72616.28  | 69980.49  | 63585.72  | 50689.32  | 76942.9   | 80490.27  | 72583.49  | 100238.5  |
| 69476.8   | 77589.66  | 78440.72  | 66789.73  | 59340.03  | 54708.11  | 80774.73  | 83403.1   | 65943.79  | 100057    |
| 73400.88  | 84069.46  | 66057.69  | 64460.37  | 67214.61  | 54015.4   | 78307.23  | 85531.12  | 77266.07  | 97295.01  |
| 68263.93  | 72111.3   | 70206.01  | 63348.79  | 63602.1   | 57359.11  | 77184.67  | 89044.58  | 78101.8   | 112886.8  |
| 73471.57  | 78463.72  | 71595.33  | 63635.16  | 59299.56  | 50801.94  | 72375.87  | 95362.89  | 78620.33  | 113276    |

|           |           |           |           |           |           |           |           |           |           |           |
|-----------|-----------|-----------|-----------|-----------|-----------|-----------|-----------|-----------|-----------|-----------|
| LP237.185 |
| 70622.63  | 75945.73  | 89555.63  | 74187.44  | 81035.04  | 82187.96  | 74510.44  | 94564.98  | 57950.57  | 73326.64  |           |
| 69810.22  | 80117.5   | 91393.35  | 67171.56  | 80719.09  | 75338.77  | 71246.81  | 79162.37  | 59309.07  | 73439.63  |           |
| 73436.14  | 72701.74  | 82052.18  | 66617.43  | 82527.55  | 78231.95  | 67906.66  | 88805.08  | 59957.37  | 76733.27  |           |
| 72438.48  | 68217.57  | 95327.4   | 101748.6  | 68123.45  | 87786.5   | 78276.9   | 82446.61  | 63241.14  | 63087.43  |           |
| 76290.18  | 70385.07  | 84129.67  | 72524.72  | 90241.96  | 87145.21  | 73501.38  | 94969.99  | 66047.05  | 75940.13  |           |

|           |           |           |           |           |           |           |           |           |           |
|-----------|-----------|-----------|-----------|-----------|-----------|-----------|-----------|-----------|-----------|
| LP237.185 | LP237.185 | LP237.185 | LP237.184 | LP237.185 | LP237.185 | LP237.185 | LP237.185 | LP237.185 | LP237.185 |
| 71190.95  | 71128.61  | 108800.8  | 52467.35  | 56965.32  | 76081.13  | 63085.66  | 56175.9   | 55414.46  | 74378.25  |
| 76600.9   | 67800.67  | 100087.3  | 50276.49  | 58201.67  | 76692.4   | 56250.89  | 57011.89  | 53638.18  | 69105.08  |
| 71559.22  | 66462.01  | 100934.7  | 49175.03  | 58180.01  | 81258.84  | 58591.91  | 52851.6   | 60323.57  | 71261     |
| 79567.83  | 64966.21  | 98480.52  | 51041.4   | 58492.73  | 80372.45  | 57393.46  | 56450.12  | 54876.68  | 78539.92  |
| 81530.49  | 70276.29  | 99716.66  | 59283.47  | 60850.07  | 79960.72  | 55523.1   | 53466.57  | 65780.35  | 79735.14  |

|           |           |           |           |           |           |           |           |           |           |
|-----------|-----------|-----------|-----------|-----------|-----------|-----------|-----------|-----------|-----------|
| LP237.185 | LP237.185 | LP237.185 | LP237.221 |
| 54376.81  | 68937.5   | 80910.79  | 95271.18  | 86890.87  | 86660.15  | 81345.93  | 94654.57  | 63564.71  | 71649.85  |
| 57165.84  | 62154.15  | 70376.99  | 84759.42  | 76669.94  | 90012.66  | 72735.9   | 74784.86  | 65385.87  | 79461.59  |
| 58301.49  | 64906.52  | 69380.06  | 96366.98  | 89258.86  | 92526.97  | 79201.44  | 78462.11  | 61944.25  | 86092.15  |
| 54587.18  | 64592.39  | 77660.69  | 104989    | 75384.92  | 99372.68  | 77621.4   | 75318.76  | 78258.28  | 95492.91  |
| 57077.09  | 66795.47  | 75114.56  | 77789.24  | 81736.53  | 105092.1  | 79377.67  | 81668.89  | 71233.07  | 80777.25  |

|           |           |           |           |           |           |           |           |           |           |
|-----------|-----------|-----------|-----------|-----------|-----------|-----------|-----------|-----------|-----------|
| LP237.221 | LP237.221 | LP237.221 | LP237.222 | LP237.221 | LP237.221 | LP237.221 | LP237.222 | LP239.126 | LP239.127 |
| 61281.83  | 86399.99  | 72037.82  | 74253.73  | 65239.5   | 41488.61  | 56008.12  | 94997.48  | 38595.5   | 39562.17  |
| 67064.75  | 89066.01  | 65552.08  | 65069.03  | 67483.31  | 44178.85  | 62928.59  | 92980.31  | 40253.52  | 40215.37  |
| 64867.42  | 89599.51  | 68087.49  | 72217.65  | 65250.32  | 44100.06  | 56262.03  | 92182.29  | 38309.38  | 51493.88  |
| 70704.2   | 98125.08  | 68968.18  | 70058.86  | 68393.08  | 43673.84  | 55481.12  | 99796.12  | 34628.6   | 41854.33  |
| 74139.27  | 107233.1  | 71659.86  | 72583.5   | 72601     | 48231.1   | 57313.94  | 96938.05  | 46479.7   | 45180.87  |

|           |           |           |           |           |           |           |           |           |           |
|-----------|-----------|-----------|-----------|-----------|-----------|-----------|-----------|-----------|-----------|
| LP239.127 | LP239.128 |
| 66707.3   | 87107.41  | 67249.88  | 86637.69  | 60186.21  | 53191.94  | 42403.38  | 58288.38  | 59249.02  | 81709.79  |
| 61758.69  | 86162.91  | 65985.68  | 78152.58  | 66274.41  | 38157.93  | 44056.03  | 60340.59  | 56325.03  | 88102.07  |
| 66997.69  | 88127.15  | 67164.56  | 80480.04  | 57088.8   | 41893.13  | 38982.61  | 63267.88  | 56868.27  | 84172.02  |
| 66312.56  | 87782.59  | 56337.46  | 76250.96  | 65245.52  | 41842.54  | 41864.58  | 61489.21  | 73558.64  | 75323.93  |
| 70263.08  | 84690.33  | 66461.19  | 84913.78  | 60776.31  | 34278.66  | 40805.5   | 59114.68  | 60029.88  | 79582.03  |



|            |           |           |           |            |            |           |            |            |           |
|------------|-----------|-----------|-----------|------------|------------|-----------|------------|------------|-----------|
| LP239.127! | LP239.128 | LP239.128 | LP239.128 | LP239.127! | LP239.127! | LP239.128 | LP239.127! | LP239.127! | LP239.128 |
| 77282.81   | 68780.97  | 85730.43  | 83477.52  | 48588.36   | 53962.13   | 55886.19  | 71429.91   | 57007.72   | 55349.01  |
| 54890.05   | 71343.2   | 82335.69  | 66682.78  | 59400.91   | 57338.06   | 52235.16  | 69422.62   | 55280.85   | 61596.3   |
| 53802.96   | 80914.64  | 80338.01  | 78295.22  | 58036.62   | 60051.27   | 54298.46  | 67177.88   | 78789.43   | 62483.23  |
| 54216.39   | 76880.71  | 79187.62  | 70577.76  | 56955.68   | 59836.73   | 55963.82  | 64451.63   | 53314.45   | 60006.14  |
| 55190.94   | 81430.36  | 85813.64  | 80133.72  | 64498      | 55296.61   | 53621.35  | 68707.27   | 52032.5    | 63409.59  |

|            |            |            |            |            |            |           |            |            |           |
|------------|------------|------------|------------|------------|------------|-----------|------------|------------|-----------|
| LP239.127! | LP239.127! | LP239.127! | LP239.127! | LP239.127! | LP239.127! | LP239.127 | LP239.127! | LP239.127! | LP239.128 |
| 75423.25   | 47746.87   | 69952.33   | 66466.52   | 52610.41   | 59983.16   | 57709.02  | 75330.54   | 74285.26   | 78465.68  |
| 69291.23   | 61091.07   | 81292.21   | 63239.4    | 51873.31   | 54868.88   | 60046.32  | 77193.45   | 74969.47   | 85341.69  |
| 71388.76   | 55208.49   | 67291.78   | 63982.8    | 55632.27   | 60514.63   | 54972.3   | 75765.66   | 69541.88   | 81836.38  |
| 71743.01   | 77885.7    | 75213.12   | 65749.17   | 52923.58   | 63902.37   | 52755.26  | 74387.3    | 73354      | 81522.01  |
| 74401.02   | 52280.4    | 78386.1    | 70413.88   | 54818.17   | 72128.31   | 55188.67  | 75179.95   | 68224.43   | 83509.52  |

|           |           |           |           |           |           |           |           |           |           |
|-----------|-----------|-----------|-----------|-----------|-----------|-----------|-----------|-----------|-----------|
| LP239.127 | LP239.164 | LP239.164 | LP239.164 |
| 59803.82  | 57694.46  | 68662.51  | 55623.86  | 61405.67  | 52302.96  | 62013.08  | 115634.7  | 109250.1  | 98668.22  |
| 61458.41  | 53593.48  | 72790.37  | 56424.37  | 63171.85  | 54652.68  | 57179.92  | 86859.45  | 84559.71  | 87750.52  |
| 58739.91  | 55720.62  | 73199.61  | 61717.65  | 69437.36  | 50295.69  | 62682.73  | 84121.63  | 97385.76  | 104312.1  |
| 63460.11  | 58908.3   | 73172.71  | 60324.54  | 65787.54  | 53060.1   | 58897.37  | 104596.2  | 93439.86  | 95043.79  |
| 60086.35  | 54019.66  | 79961.94  | 58954.87  | 72191.2   | 47597.62  | 56965.22  | 88101.92  | 103224.5  | 126178    |

|           |           |           |           |           |           |           |           |           |           |
|-----------|-----------|-----------|-----------|-----------|-----------|-----------|-----------|-----------|-----------|
| LP239.164 |
| 84096.49  | 97071.15  | 85767.23  | 61039.88  | 65185.89  | 62225.86  | 60110.03  | 60953.61  | 54968.87  | 88220.74  |
| 74824.29  | 120392.3  | 75433.73  | 49049.17  | 67588.29  | 65956.45  | 61521.07  | 60902.83  | 59239.13  | 80354.46  |
| 76016.28  | 137943.3  | 63654.93  | 57832.43  | 64330.53  | 67951.02  | 58906.28  | 60716.33  | 59416.74  | 77258.28  |
| 77856.67  | 120522.4  | 93851.4   | 59486.17  | 69375.03  | 67664.54  | 65043.18  | 64825.59  | 62583.72  | 78358.98  |
| 73498.47  | 117500.8  | 69575.82  | 56612.79  | 71863.48  | 63629.19  | 65256.06  | 60570.56  | 61496.54  | 85310     |

|           |           |           |           |           |           |           |           |           |           |
|-----------|-----------|-----------|-----------|-----------|-----------|-----------|-----------|-----------|-----------|
| LP239.164 | LP239.164 | LP239.164 | LP239.163 | LP239.164 | LP239.164 | LP239.163 | LP239.164 | LP239.164 | LP239.164 |
| 40733.89  | 56746.4   | 66251.81  | 87999.35  | 70415.05  | 95619.96  | 72680.85  | 70332.84  | 96260.56  | 55552.52  |
| 40295.37  | 69854.74  | 69297.22  | 95991.6   | 73823.53  | 92531.83  | 78696     | 71647.61  | 99348.13  | 56445.88  |
| 38368.34  | 60815.26  | 63897.25  | 91223.01  | 78126.43  | 96681.52  | 85435     | 71836.73  | 105348.9  | 55757.15  |
| 40441.91  | 63777.03  | 72381.88  | 88305.05  | 71489.13  | 94279.12  | 77145.51  | 71052.37  | 94878.36  | 56103.45  |
| 38957.55  | 68542.14  | 68603.48  | 92779.61  | 69778.58  | 99116.11  | 77251.46  | 80629.87  | 95802.63  | 53757.65  |

|           |           |           |           |           |           |           |           |           |           |
|-----------|-----------|-----------|-----------|-----------|-----------|-----------|-----------|-----------|-----------|
| LP239.164 | LP239.200 |
| 69274.04  | 98612.96  | 119313.5  | 105952.9  | 93466.07  | 95232.39  | 84697.03  | 88642.48  | 79519.4   | 71776.29  |
| 77512     | 96791.97  | 110003.8  | 102864.1  | 85648.93  | 80900.96  | 81677.15  | 85105.21  | 82085.02  | 72239.2   |
| 82912.31  | 90070.74  | 121932.6  | 104736.6  | 97438.63  | 86310.82  | 84111.09  | 83868.2   | 84403.74  | 70325.65  |
| 87093.09  | 87790.91  | 106768    | 103227.2  | 92393.34  | 94336.42  | 81958.48  | 88435.44  | 89439.62  | 78371.17  |
| 79054.33  | 93329.26  | 112406.3  | 102861.8  | 101060.9  | 86217.46  | 75664.71  | 79408.45  | 83822.43  | 78460.31  |

|           |           |           |           |           |           |           |           |           |           |
|-----------|-----------|-----------|-----------|-----------|-----------|-----------|-----------|-----------|-----------|
| LP239.200 |
| 88094.54  | 77910.93  | 110755    | 67348.3   | 73566.61  | 81005.84  | 70684.98  | 55502.84  | 59951.25  | 74104.67  |
| 94726.67  | 72812.59  | 105910.7  | 74524.67  | 73014.57  | 72512.52  | 76735.85  | 59601.97  | 60342.1   | 68414.5   |
| 87410.86  | 74960.56  | 99597.46  | 75352.78  | 32598.05  | 86690.65  | 78874.66  | 57401.54  | 64549.39  | 64780.68  |
| 95856.52  | 72561     | 107466    | 73559.16  | 73988.98  | 81660.63  | 72128.33  | 51971.77  | 62389.36  | 71690.49  |
| 98150.72  | 82533.26  | 101088.4  | 75867.17  | 79832.33  | 82724.44  | 87267.04  | 52980.4   | 59436.2   | 71325.48  |

|           |           |           |           |           |           |           |           |           |           |
|-----------|-----------|-----------|-----------|-----------|-----------|-----------|-----------|-----------|-----------|
| LP239.200 |
| 98929.49  | 72844.94  | 58312.22  | 75746.53  | 60457.68  | 70282.79  | 60596.56  | 72664.31  | 80948.98  | 65514.89  |
| 109758.8  | 72795.06  | 55801.78  | 79713.88  | 66369.56  | 68240.61  | 63951.24  | 73512.87  | 73293.12  | 72629.43  |
| 69760.1   | 71473.55  | 50233.87  | 78331.34  | 70886.79  | 67546.35  | 59375.84  | 76628.01  | 74378.58  | 69504.52  |
| 100013.1  | 78894.36  | 50496.02  | 80749.32  | 65956.46  | 72523.78  | 62071.49  | 75308.05  | 76430.22  | 74319.33  |
| 106868.2  | 76199.23  | 56137.02  | 80613.84  | 63362.53  | 79693.34  | 63174.48  | 76731.63  | 80325.79  | 73617.5   |



|           |           |           |           |           |           |           |           |           |           |
|-----------|-----------|-----------|-----------|-----------|-----------|-----------|-----------|-----------|-----------|
| LP239.200 |
| 60515.39  | 72196.61  | 67005.31  | 63746.38  | 67685.77  | 79496.71  | 68636.01  | 79306.25  | 76595.7   | 50439.11  |
| 59181.83  | 66903.97  | 63837.43  | 59229.06  | 80179.16  | 79765.63  | 68087.66  | 80460.63  | 71928.38  | 52650.7   |
| 60983.81  | 67969.9   | 66404.3   | 64637.32  | 75111.41  | 46301.44  | 72855.76  | 86690.36  | 68969.65  | 44100.58  |
| 58503.96  | 70930.18  | 70500.75  | 64431.36  | 67816.75  | 71935.37  | 66120.74  | 87471.23  | 70171.38  | 51813.39  |
| 58955.37  | 76539.2   | 74354     | 62242.91  | 74345.76  | 81792.96  | 67483.97  | 89033.79  | 69504.11  | 50031.28  |

|           |           |           |           |           |           |           |           |           |           |
|-----------|-----------|-----------|-----------|-----------|-----------|-----------|-----------|-----------|-----------|
| LP239.200 |
| 56067.8   | 69188.95  | 87040.42  | 50649.64  | 67540.98  | 91212.67  | 88076.76  | 87389.66  | 76206.46  | 60898.46  |
| 60562.24  | 67375.65  | 84567.66  | 45199     | 76388.94  | 87153.82  | 83421.01  | 75092.46  | 77514.33  | 58927.51  |
| 54388.19  | 68182.2   | 91603.26  | 48645.88  | 82139.93  | 90803.27  | 84590.95  | 80888.57  | 82255.47  | 54747.97  |
| 59255.39  | 80612.14  | 86423.77  | 50291.19  | 68628.09  | 93663.63  | 86762.79  | 81914.59  | 76869     | 54286.78  |
| 59981.79  | 71385.39  | 79453.51  | 49137.58  | 72271.77  | 96434.21  | 87537.52  | 79446.26  | 80433.04  | 55722.7   |

|           |           |           |           |           |           |           |           |           |           |
|-----------|-----------|-----------|-----------|-----------|-----------|-----------|-----------|-----------|-----------|
| LP239.236 | LP239.237 | LP239.236 | LP240.160 | LP240.196 | LP240.232 | LP240.232 | LP240.232 | LP240.232 | LP240.232 |
| 136686.5  | 48349.83  | 69250.47  | 13992.54  | 18951.3   | 20632.79  | 24098.63  | 35132.91  | 28673.81  | 19089.96  |
| 138627.4  | 53104.61  | 66850.73  | 12923.95  | 13552.09  | 22017.5   | 23127.26  | 35592.12  | 27431.79  | 17665.04  |
| 157287.9  | 48530.74  | 70484.74  | 12860.63  | 15676.03  | 21875.85  | 21523.81  | 32618.16  | 29147.61  | 18613.58  |
| 161297.5  | 52087.08  | 68667.78  | 13648.43  | 14232.66  | 16058.73  | 21420.98  | 35869.26  | 27621.73  | 18984.46  |
| 149390    | 45225.54  | 72063.9   | 15373.13  | 17991.74  | 20591.12  | 19810.57  | 34421.4   | 31751.5   | 19464.29  |

|           |           |           |           |           |           |           |           |           |           |
|-----------|-----------|-----------|-----------|-----------|-----------|-----------|-----------|-----------|-----------|
| LP241.143 |
| 42381.61  | 55458.08  | 52401.38  | 52253.79  | 49137.23  | 42676.26  | 43191.15  | 66222.19  | 52523.8   | 46522.75  |
| 41942.24  | 62112.6   | 48087.87  | 56296.62  | 61098.59  | 42346.02  | 39642.04  | 64964.01  | 53873.99  | 48714.68  |
| 41292.73  | 54883.69  | 43471.06  | 54655.95  | 48665.41  | 48529.06  | 41970.95  | 56861.61  | 54504.84  | 43234.25  |
| 44133.52  | 66034.03  | 69207.97  | 103667.6  | 73475.78  | 44074.48  | 51555.13  | 63362.55  | 54372.45  | 47365.73  |
| 54068.37  | 73337.16  | 53436.49  | 51577.39  | 67350.1   | 48645.72  | 35947.34  | 73692.27  | 78893.39  | 41370.52  |

|           |           |           |           |           |           |           |           |           |           |           |
|-----------|-----------|-----------|-----------|-----------|-----------|-----------|-----------|-----------|-----------|-----------|
| LP241.143 |
| 48084.96  | 40255.89  | 51012.82  | 42663.64  | 45652.69  | 46071.16  | 54515.55  | 51762.91  | 55920.25  | 45906.56  |           |
| 47594.29  | 44064.45  | 44683.57  | 43066.82  | 47068.48  | 48232.53  | 55070.82  | 52864.37  | 62929.61  | 45189.45  |           |
| 53187.96  | 47164.08  | 45158.21  | 41128.32  | 46239     | 47744.21  | 48101.92  | 53579.26  | 64121.16  | 44055.88  |           |
| 49849.9   | 39559.37  | 49990.36  | 45091.12  | 42509.63  | 48640.58  | 51446.89  | 55278.29  | 65737.51  | 48346.26  |           |
| 47313.55  | 43726.58  | 48757.32  | 48336.72  | 50429.17  | 48706.95  | 64373.7   | 56236.25  | 35997.56  | 42527.23  |           |

|           |           |           |           |           |           |           |           |           |           |
|-----------|-----------|-----------|-----------|-----------|-----------|-----------|-----------|-----------|-----------|
| LP241.143 | LP241.143 | LP241.143 | LP241.144 | LP241.143 | LP241.143 | LP241.143 | LP241.143 | LP241.143 | LP241.143 |
| 53710.49  | 47988.19  | 38605.58  | 52299.06  | 43678.48  | 49416.29  | 35781.99  | 55563.86  | 51630.4   | 52707.89  |
| 50798.98  | 52048.94  | 35178.33  | 53665.05  | 44095.98  | 49377.73  | 31762.04  | 56361.2   | 50893.18  | 54032.39  |
| 52799.62  | 46962.59  | 33336.39  | 52450.2   | 44344.54  | 49570.67  | 38291.3   | 51720.78  | 53425.54  | 59977.53  |
| 51283.83  | 58030.06  | 36528.42  | 51179.32  | 42049.52  | 51880.29  | 35474.78  | 51837.93  | 49711.75  | 55256.04  |
| 53633.18  | 50999.06  | 53542.33  | 52859.72  | 43160.16  | 51041.41  | 35008.55  | 49736.15  | 53964.74  | 54198.04  |

|           |           |           |           |           |           |           |           |           |           |
|-----------|-----------|-----------|-----------|-----------|-----------|-----------|-----------|-----------|-----------|
| LP241.143 |
| 54002.17  | 52872.74  | 46295.07  | 53099.35  | 43610.83  | 49194.86  | 45748.34  | 61104.17  | 44648.74  | 76764.58  |
| 52078.56  | 56014.73  | 44354.95  | 50276.8   | 42186.46  | 47103.31  | 48450.97  | 53993.16  | 42664.28  | 75779.07  |
| 52020.92  | 56651.77  | 49513.41  | 50870.77  | 42474.21  | 48363.81  | 44417.15  | 59155.76  | 42541.21  | 71704.64  |
| 54152.16  | 60897.66  | 47349.57  | 55006.73  | 42852.64  | 48895.11  | 53477.62  | 61641.7   | 42861.34  | 72715.94  |
| 42370.55  | 56656.06  | 42023.78  | 49949.97  | 39003.05  | 47225.43  | 40488.73  | 63638.9   | 42590.85  | 77769.41  |

|           |           |           |           |           |           |           |           |           |           |
|-----------|-----------|-----------|-----------|-----------|-----------|-----------|-----------|-----------|-----------|
| LP241.143 |
| 79208.64  | 33419.71  | 41677.09  | 42192.97  | 41382.89  | 55740.84  | 44267.48  | 44979.33  | 35156.82  | 47448.44  |
| 74242.84  | 41330.87  | 39368.67  | 41256.86  | 41370.03  | 59626.9   | 42211.52  | 43926.72  | 42935.81  | 47900.23  |
| 74877.67  | 36031.56  | 41985.05  | 40501.6   | 41293.93  | 58634.69  | 43322.76  | 43821.62  | 39270.65  | 46652.36  |
| 73785.58  | 30336.74  | 45914.42  | 38197.51  | 41973.93  | 52555.13  | 45354.17  | 45623.79  | 37593.98  | 43036.74  |
| 76680.74  | 34165.95  | 39075.34  | 37293.82  | 39101.08  | 54035.09  | 46347.26  | 37909.07  | 36721.53  | 49234.18  |



|           |           |           |           |           |           |           |           |           |           |
|-----------|-----------|-----------|-----------|-----------|-----------|-----------|-----------|-----------|-----------|
| LP241.143 | LP241.143 | LP241.143 | LP241.143 | LP241.162 | LP241.162 | LP241.162 | LP241.162 | LP241.162 | LP241.162 |
| 33987.45  | 25463.84  | 53501.92  | 56732.75  | 148881.3  | 157017    | 108859.4  | 140930.3  | 130493    | 95187.29  |
| 37577.36  | 22716.61  | 52084.87  | 56992.31  | 149804.2  | 156439.8  | 98520.26  | 122394.5  | 128842.4  | 94983.25  |
| 35142.38  | 26258.93  | 50988.82  | 55800.68  | 149210.5  | 159462.8  | 112574.1  | 140808.9  | 138682.7  | 89749.27  |
| 33432.03  | 26307.98  | 50312.18  | 56293.06  | 156992.6  | 179438.9  | 123700.1  | 131749    | 132938.3  | 103855.9  |
| 34693.6   | 29722.61  | 54128.65  | 60971.4   | 163267.1  | 177971    | 117807    | 144318    | 148405.9  | 107321.4  |

|           |           |           |           |           |           |           |           |           |           |
|-----------|-----------|-----------|-----------|-----------|-----------|-----------|-----------|-----------|-----------|
| LP241.162 | LP241.163 | LP241.163 |
| 108403.3  | 110619.4  | 146947.7  | 178141.7  | 134767.9  | 140645.4  | 92955.96  | 92966.44  | 112875.3  | 130745.9  |
| 113452.2  | 126073.5  | 141375.3  | 177830.1  | 131591.5  | 122817.8  | 96772.28  | 105276.5  | 122901.5  | 113997.1  |
| 102835    | 122085.8  | 154777.1  | 174119.7  | 148460.4  | 125209.6  | 97065.82  | 107230.6  | 113836    | 124620.7  |
| 109648.9  | 112763    | 150609.9  | 186080.4  | 153300    | 140569.3  | 96823.5   | 115660.3  | 108993.7  | 137178.8  |
| 116994.9  | 124915.5  | 167336.4  | 172948.5  | 147032.6  | 128308.4  | 88453.96  | 112349.8  | 121187.7  | 135629.6  |

|           |           |           |           |           |           |           |           |           |           |
|-----------|-----------|-----------|-----------|-----------|-----------|-----------|-----------|-----------|-----------|
| LP241.163 | LP241.163 | LP241.180 | LP241.179 | LP241.18_ | LP241.216 | LP241.216 | LP241.216 | LP241.216 | LP241.216 |
| 120079    | 147643    | 103985.7  | 109311.8  | 134534.5  | 178317.4  | 130499    | 221471.7  | 147173.8  | 85174.45  |
| 124026    | 150225.9  | 109737.5  | 104297    | 143378.3  | 151852.5  | 190375.4  | 159250.1  | 154986.8  | 105234.5  |
| 127048.7  | 140467.6  | 93336.19  | 95071.09  | 137301.8  | 164411    | 131481.2  | 153560.6  | 142426.5  | 97973.98  |
| 128100.1  | 152293.9  | 107546.5  | 104713.8  | 137088.9  | 180201    | 198204.5  | 141973.8  | 155597.6  | 104753.1  |
| 123816.1  | 153726.9  | 113478.1  | 113189.4  | 152838.8  | 191785.2  | 129825.2  | 208371.9  | 196752.8  | 103143.9  |

|           |           |           |           |           |           |           |           |           |           |
|-----------|-----------|-----------|-----------|-----------|-----------|-----------|-----------|-----------|-----------|
| LP241.216 |
| 102547.3  | 109698.8  | 194530.5  | 170263.9  | 160315.6  | 149222.3  | 154003.3  | 138463.1  | 141734.7  | 88940.34  |
| 81043.02  | 129162    | 229013.9  | 240666.9  | 173713.3  | 125961.9  | 143984.7  | 82396.21  | 194309.7  | 99711.74  |
| 98231.02  | 129685.4  | 159625.8  | 142984.7  | 124304.6  | 140066.7  | 128203.8  | 94682.73  | 117593.7  | 85567.86  |
| 83124.69  | 168371.6  | 167924.8  | 157731    | 125132.8  | 154114.4  | 134196.8  | 102712    | 157982.7  | 89725.85  |
| 100904.5  | 135085.5  | 177456.5  | 172967.9  | 134868.3  | 160364    | 139608.4  | 105084.4  | 125314.2  | 94079.01  |

|           |           |           |           |           |           |           |           |           |           |           |
|-----------|-----------|-----------|-----------|-----------|-----------|-----------|-----------|-----------|-----------|-----------|
| LP241.216 |
| 129704.1  | 73670.39  | 131440.3  | 183843.8  | 130511.4  | 73407.26  | 68830.19  | 75661.74  | 112970.6  | 160364.4  |           |
| 109608.5  | 118297.3  | 134858.4  | 138637    | 158052.2  | 83018.94  | 101460.8  | 85054.57  | 113037.9  | 110407.9  |           |
| 93076.66  | 94501.76  | 99259.1   | 124162.8  | 142700.7  | 62216.64  | 64903.39  | 98354.09  | 122006    | 123825.6  |           |
| 83004.04  | 101159.9  | 131565.4  | 124711.1  | 141502.9  | 64134.67  | 67709.65  | 104584.2  | 101500.4  | 120415.9  |           |
| 101307.6  | 101330.8  | 177803.5  | 124109.8  | 152030.7  | 66332.51  | 70257.93  | 102463.8  | 135805.2  | 121371.6  |           |

|           |           |           |           |           |           |           |           |           |           |
|-----------|-----------|-----------|-----------|-----------|-----------|-----------|-----------|-----------|-----------|
| LP241.216 |
| 134588.8  | 126469.2  | 51439.76  | 128350.9  | 155103.2  | 54196.99  | 81225.65  | 121017.2  | 183190.6  | 75608.56  |
| 142123.9  | 95408.57  | 38022.23  | 129412.3  | 143268    | 53188.15  | 89275.05  | 127532.5  | 104256.4  | 84707.53  |
| 137744    | 104041.5  | 51399.63  | 120317.6  | 157096.9  | 46967.49  | 86428.77  | 143574    | 111629.9  | 77986.75  |
| 140214.3  | 100634.1  | 51332.35  | 130067.6  | 158678.3  | 50693.45  | 75647.57  | 135250.5  | 114960.8  | 78269.49  |
| 165072.4  | 174668    | 55165.06  | 136055.9  | 172056    | 52935.78  | 83816.83  | 150267.8  | 129136.3  | 76697.43  |

|           |           |           |           |           |           |           |           |           |           |
|-----------|-----------|-----------|-----------|-----------|-----------|-----------|-----------|-----------|-----------|
| LP241.216 |
| 139944.7  | 193455.7  | 102792.8  | 64990.66  | 65339.98  | 91890.41  | 107990.7  | 200213    | 52152.92  | 129748.4  |
| 155479.7  | 148173.7  | 145335.8  | 69836.91  | 52239.98  | 72942.12  | 118527.7  | 99708.2   | 53931.16  | 138967.3  |
| 118581.5  | 152372.2  | 121704.7  | 68598.11  | 55694.82  | 76749.9   | 91863.58  | 157930    | 48868.79  | 119291.3  |
| 103281.2  | 159904.1  | 124813.6  | 66920.77  | 58035.97  | 77970.99  | 84215.74  | 161464.1  | 50713.99  | 117028    |
| 142983.7  | 199281.7  | 132894.8  | 70389.16  | 56771.98  | 74429.7   | 99658.05  | 164692.7  | 49983.34  | 126960.4  |

|           |           |           |           |           |           |           |           |           |           |
|-----------|-----------|-----------|-----------|-----------|-----------|-----------|-----------|-----------|-----------|
| LP241.216 |
| 112933.5  | 143762.8  | 145341.5  | 141512.5  | 72984.66  | 101671.3  | 113002.8  | 152015.3  | 117594.7  | 98841.23  |
| 119833.6  | 150545.9  | 173635.7  | 141579.5  | 82759.29  | 90276.13  | 84584.25  | 150014.5  | 117630.2  | 106592    |
| 103069.7  | 136719.8  | 151108    | 135376.5  | 100473.9  | 115281.3  | 105396.5  | 124442.1  | 123220.8  | 85393.13  |
| 103501    | 135757.8  | 153374.8  | 136146.9  | 93171.27  | 100808.2  | 112247    | 126561.7  | 131262.7  | 80854.88  |
| 148437.1  | 118351    | 162023.8  | 150285.2  | 102693.6  | 111437.2  | 118375    | 156030.3  | 137055.2  | 96225.23  |



|           |           |           |           |           |           |           |           |           |           |
|-----------|-----------|-----------|-----------|-----------|-----------|-----------|-----------|-----------|-----------|
| LP241.216 |
| 150027.2  | 113786.3  | 96058.58  | 89842.68  | 62901.12  | 135605.9  | 113730.7  | 63182.42  | 88309.13  | 77428.92  |
| 115352    | 66396.22  | 94457.07  | 89632.24  | 57972.71  | 149573.2  | 100865.1  | 48302.56  | 93279.14  | 81009.35  |
| 125479.4  | 92187.5   | 101817.1  | 96891.83  | 55818.7   | 102675.9  | 101914.3  | 65081.27  | 91477.19  | 86922.34  |
| 135935.2  | 92993.35  | 103941.8  | 93902.8   | 59905.77  | 113422    | 102519.6  | 66553.1   | 97055.05  | 88976.09  |
| 138959.7  | 98546.11  | 92644.82  | 100877.8  | 61340.64  | 115212.1  | 108327.8  | 70873.17  | 89734.76  | 138092    |

|           |           |           |           |           |           |           |           |           |           |
|-----------|-----------|-----------|-----------|-----------|-----------|-----------|-----------|-----------|-----------|
| LP241.216 |
| 87644.76  | 84186.56  | 90073.43  | 72267.94  | 80822.05  | 73997.13  | 46971.87  | 62260.69  | 141027.2  | 132354.6  |
| 138183    | 81121.17  | 102910.4  | 91295.59  | 117797.7  | 81618.37  | 42935.48  | 56685.98  | 150023    | 145087    |
| 83428.58  | 78484.19  | 111320.8  | 81898.36  | 87109.66  | 77035.87  | 53572.31  | 58767.88  | 133789    | 120050.6  |
| 90896.83  | 76766.97  | 113916.3  | 81673.94  | 86842.98  | 81623.46  | 57223.71  | 61028.8   | 133930.1  | 117657.4  |
| 101472    | 87269.58  | 117347.2  | 81852.69  | 91016.53  | 81079.53  | 55159.59  | 64998.18  | 144784.6  | 135559.1  |

|           |           |           |           |           |           |           |           |           |           |
|-----------|-----------|-----------|-----------|-----------|-----------|-----------|-----------|-----------|-----------|
| LP241.216 | LP242.121 | LP242.121 |
| 125200.3  | 173830.8  | 70294.44  | 68584.46  | 56588.74  | 174116.6  | 109499.1  | 85081.5   | 116340.3  | 84599.07  |
| 154607.9  | 115666.9  | 68802.5   | 48685.18  | 52305.9   | 144715.4  | 96517.29  | 92062.31  | 101917.3  | 96003.35  |
| 141458.1  | 154872.6  | 78156.39  | 64121.24  | 57878.8   | 169892.8  | 95187.23  | 86470.75  | 81780.15  | 76621.84  |
| 137562.8  | 179115.1  | 81660.9   | 69443.25  | 59890.14  | 158486.7  | 101764.2  | 88460.01  | 94450.42  | 68074.81  |
| 142742.2  | 183848.9  | 83184.86  | 67647.52  | 61180.08  | 160386.6  | 98536.76  | 93804.59  | 136089.7  | 100198.7  |

|           |           |           |           |           |           |           |           |           |           |
|-----------|-----------|-----------|-----------|-----------|-----------|-----------|-----------|-----------|-----------|
| LP242.121 | LP242.120 | LP242.121 | LP242.120 | LP242.120 | LP242.121 | LP242.121 | LP242.121 | LP242.121 | LP242.121 |
| 97062.9   | 94585.22  | 85985.88  | 85915.03  | 67645.65  | 66392.92  | 67217.75  | 65468.54  | 60133.43  | 63210.64  |
| 93157.53  | 105642.3  | 78967.4   | 76824.88  | 83635.7   | 89310.51  | 94474.79  | 91357.52  | 56379.01  | 59095.53  |
| 79188.49  | 110647.5  | 90711.82  | 95295.58  | 64758.32  | 76970.81  | 91689.03  | 92273.14  | 78534.22  | 55181.34  |
| 85779.86  | 96278     | 75430.85  | 84636.94  | 67160.28  | 57181.59  | 76678.06  | 67876.54  | 51082.34  | 62056.6   |
| 91500.27  | 109802.2  | 119641.6  | 105215.4  | 68634.92  | 86939.88  | 85245.34  | 101374.7  | 64360.22  | 66934.05  |

|           |           |           |           |           |           |           |           |           |           |
|-----------|-----------|-----------|-----------|-----------|-----------|-----------|-----------|-----------|-----------|
| LP242.121 | LP242.120 | LP242.120 | LP242.121 |
| 63939.96  | 51141.15  | 84139.39  | 50729.17  | 62249.07  | 80309.8   | 67125.64  | 63795.59  | 41903.94  | 46575.14  |
| 63930.17  | 72151.22  | 65636.69  | 62077.43  | 62509.81  | 73939.98  | 60434.93  | 62744.58  | 42172.58  | 50265.34  |
| 77198.22  | 52428.93  | 82421.25  | 56581.48  | 64149.08  | 76459.63  | 62728.27  | 66549.51  | 58550.31  | 52581.72  |
| 66158.67  | 53304.81  | 87543.04  | 51450.82  | 62652.02  | 75698.1   | 64537.02  | 66311.65  | 47248.74  | 50708.07  |
| 79251.63  | 64536.44  | 81690.47  | 55621.28  | 61537.82  | 74030.97  | 64930.8   | 69741.68  | 38335.03  | 50822.87  |

|           |           |           |           |           |           |           |           |           |           |
|-----------|-----------|-----------|-----------|-----------|-----------|-----------|-----------|-----------|-----------|
| LP242.120 | LP242.211 | LP242.219 | LP242.247 | LP242.248 | LP243.122 | LP243.122 | LP243.122 | LP243.122 | LP243.122 |
| 67520.5   | 5365.358  | 12606.42  | 12749.41  | 10511.84  | 27795.34  | 31310.79  | 37378.26  | 30620.46  | 41697.46  |
| 57498     | 7400.104  | 15293.33  | 14697.33  | 8877.538  | 46963.35  | 36128.89  | 25688.6   | 28081.15  | 39915.24  |
| 73092.68  | 9268.518  | 13161.2   | 15641.13  | 11505.01  | 38787.08  | 30410.49  | 27441.36  | 35900.18  | 40615.42  |
| 67517.64  | 6606.957  | 9672.742  | 16103.41  | 10215.09  | 40978.81  | 35788.54  | 25048.14  | 34666.43  | 33994.68  |
| 60272.77  | 7970.341  | 13202.82  | 18820.91  | 14520.43  | 35411.42  | 35953.25  | 26257.56  | 37241.8   | 39365.7   |

|           |           |           |           |           |           |           |           |           |           |
|-----------|-----------|-----------|-----------|-----------|-----------|-----------|-----------|-----------|-----------|
| LP243.122 | LP243.123 | LP243.123 |
| 44031.09  | 28515.36  | 34954.65  | 41256.52  | 41507.88  | 33128.23  | 31804.11  | 34299.83  | 41442.42  | 63669.2   |
| 52129.57  | 27348.5   | 30187.83  | 44699.93  | 36961.43  | 30672.21  | 29529.05  | 23904.7   | 46065.45  | 54239.84  |
| 52108.77  | 26151.29  | 29232.92  | 44355.92  | 38483.27  | 28911.72  | 25419.1   | 20318.57  | 41755.35  | 53715.69  |
| 52292.13  | 36835.23  | 26839.24  | 40028.95  | 36182.48  | 30393.67  | 25131.39  | 24444.27  | 45834.6   | 62347.66  |
| 59071.08  | 27362.09  | 24668.23  | 42541.38  | 39302.2   | 30845.39  | 24358.64  | 26296.81  | 43499.81  | 55507.53  |

|           |           |           |           |           |           |           |           |           |           |
|-----------|-----------|-----------|-----------|-----------|-----------|-----------|-----------|-----------|-----------|
| LP243.123 | LP243.122 | LP243.122 | LP243.123 | LP243.123 | LP243.123 | LP243.122 | LP243.122 | LP243.123 | LP243.159 |
| 79848.15  | 38618.92  | 34394.47  | 32428.76  | 44063.5   | 41155.56  | 47274.87  | 39307.68  | 41191.71  | 28732.33  |
| 72355.73  | 37445.65  | 37692.94  | 41995.29  | 40431.99  | 40430.96  | 49576.85  | 37842.56  | 41798.78  | 25884.22  |
| 71570.08  | 38964.99  | 34434.31  | 45753.1   | 37710.38  | 37976.62  | 52255.96  | 35257.65  | 46058.5   | 24995.25  |
| 71486.08  | 35118.89  | 29849.66  | 40035.19  | 40825.29  | 40513.06  | 51145.72  | 38112.27  | 49606.29  | 24757.01  |
| 65466.93  | 36529.21  | 33115.97  | 40102.01  | 42188.09  | 40088.51  | 47757.31  | 38198.29  | 43236.77  | 31635.89  |



|           |           |           |           |           |           |           |           |           |           |
|-----------|-----------|-----------|-----------|-----------|-----------|-----------|-----------|-----------|-----------|
| LP243.159 | LP243.159 | LP243.177 | LP243.177 | LP243.178 | LP243.178 | LP243.177 | LP243.178 | LP243.178 | LP243.178 |
| 30458.63  | 31085.58  | 34396.73  | 22811.05  | 24420.21  | 37998.35  | 32949.53  | 32051.47  | 33914.08  | 31649.65  |
| 33369.95  | 39990.58  | 33276.68  | 26133.27  | 29979.96  | 40831.51  | 34173.36  | 30131.9   | 33608.49  | 27959.38  |
| 33412.13  | 35094     | 34034.44  | 26263.82  | 24238.08  | 38150.13  | 33396.46  | 30025.33  | 34229.51  | 30254.1   |
| 30213.99  | 37463.9   | 34197.86  | 26949.92  | 29198.01  | 39060.07  | 30970.91  | 27261.07  | 31524.27  | 32884.33  |
| 33224.28  | 41113.22  | 53259.02  | 42294.56  | 40593.86  | 63246.62  | 50255.01  | 49706.42  | 53044.97  | 45220.08  |

|           |           |           |           |           |           |           |           |           |           |
|-----------|-----------|-----------|-----------|-----------|-----------|-----------|-----------|-----------|-----------|
| LP243.178 |
| 32697.38  | 33906.02  | 40583.66  | 38475.62  | 25676.81  | 40842.42  | 32871.45  | 34300.06  | 47201.95  | 39679.19  |
| 30360.2   | 29318.67  | 33752.57  | 35745.24  | 25659.06  | 36765.83  | 32367.69  | 28764.1   | 39402.65  | 37615.87  |
| 34654.99  | 34020.85  | 36958.58  | 36670.22  | 25206.7   | 41560.82  | 32786.36  | 30847.93  | 47502.14  | 40491.73  |
| 33143.01  | 38154.14  | 37110.34  | 41253.33  | 26101.91  | 44129.37  | 31052.75  | 35289.39  | 44908.76  | 41156.97  |
| 36004.53  | 43412.48  | 41669.99  | 63150.94  | 47911.67  | 54206.8   | 51111.64  | 48897.03  | 84258.7   | 52639.93  |

|           |           |           |           |           |           |           |           |           |           |
|-----------|-----------|-----------|-----------|-----------|-----------|-----------|-----------|-----------|-----------|
| LP243.178 | LP243.178 | LP243.178 | LP243.178 | LP243.178 | LP243.941 | LP244.154 | LP244.154 | LP244.154 | LP244.154 |
| 35604.93  | 53152.28  | 40992.44  | 43545.61  | 41026.75  | 26638.23  | 23723.75  | 31680.77  | 38034.16  | 39992.14  |
| 40867.31  | 50188.3   | 44544.95  | 39946.67  | 40515.97  | 29052.27  | 23048.73  | 29479.15  | 36015.51  | 36722.29  |
| 38220.77  | 52821.12  | 38205.4   | 37476.11  | 44576.04  | 29202.28  | 21469.25  | 28743.68  | 32604.59  | 39566.78  |
| 38012.69  | 57137.96  | 42000.59  | 42538.1   | 43216.77  | 28655.03  | 22652.6   | 28566.98  | 33210.75  | 35962.69  |
| 45794.89  | 54717.27  | 48757.45  | 52879.3   | 51933.5   | 29430.04  | 20420.88  | 33214.11  | 33478.74  | 30602.09  |

|           |           |           |           |           |           |           |           |           |           |
|-----------|-----------|-----------|-----------|-----------|-----------|-----------|-----------|-----------|-----------|
| LP244.191 | LP244.191 | LP245.117 | LP245.118 | LP245.117 | LP245.118 | LP245.117 | LP245.118 | LP245.118 | LP245.118 |
| 37694.98  | 34511.01  | 115225.5  | 657974.6  | 203146.1  | 490040.8  | 271552.8  | 397273.5  | 715327.4  | 327914    |
| 37130.61  | 29977.98  | 107848.9  | 598950.7  | 232429    | 426349    | 248976.9  | 433749.5  | 583436.9  | 336777.7  |
| 41439.28  | 30894.9   | 123141.3  | 460689.6  | 265552.2  | 513558.2  | 252753.6  | 512881.8  | 502971.1  | 450124.5  |
| 43806.45  | 32629.5   | 93135.74  | 499459.2  | 218925.1  | 468200.5  | 174055.3  | 555784.9  | 543480.9  | 386311.6  |
| 44767.19  | 30165.29  | 119280.9  | 650993.9  | 167815.6  | 320150    | 197492.1  | 361474.3  | 486999.2  | 228079.4  |

|           |           |           |           |           |           |           |           |           |           |           |
|-----------|-----------|-----------|-----------|-----------|-----------|-----------|-----------|-----------|-----------|-----------|
| LP245.118 |
| 377907.4  | 481588.1  | 411759    | 346986.3  | 367722.9  | 285322.8  | 274379.5  | 525355.6  | 300093.3  | 448743.4  |           |
| 277134.6  | 392863.4  | 387847.7  | 455098.7  | 372734.4  | 284964.7  | 234960.8  | 447177    | 277653    | 342331.2  |           |
| 273882.8  | 430056.9  | 319990.2  | 446572.7  | 371044.1  | 419565.1  | 224054.8  | 528819.6  | 171225.6  | 400185.5  |           |
| 257430    | 393208.3  | 296324.9  | 353621.6  | 372458.7  | 225728.9  | 254588.3  | 528855.1  | 266302.6  | 476912    |           |
| 305854.7  | 390173.3  | 317076.4  | 306843.9  | 246788.8  | 248246    | 294738.3  | 447657    | 197158.7  | 386902.1  |           |

|           |           |           |           |           |           |           |           |           |           |           |
|-----------|-----------|-----------|-----------|-----------|-----------|-----------|-----------|-----------|-----------|-----------|
| LP245.118 |
| 340099.1  | 248151.3  | 264495.2  | 240263.7  | 273186.3  | 215295.1  | 174919.6  | 345616.1  | 420266.2  | 279420.4  |           |
| 351389.6  | 317931.3  | 317626.4  | 284892.7  | 389245.8  | 303825.3  | 204915    | 369077.4  | 389281.1  | 334263.1  |           |
| 430418.2  | 251577.6  | 291991.9  | 301627.7  | 234449.3  | 250154.4  | 260808.8  | 393331.3  | 555714.5  | 392819.4  |           |
| 376804.7  | 287188.7  | 352306.2  | 219968.9  | 252072.8  | 243941    | 194130.7  | 257153.5  | 374119    | 269494    |           |
| 367153.7  | 279231.1  | 357305.6  | 297157.8  | 240683.2  | 222478.3  | 257091.8  | 376213    | 418997    | 365830.1  |           |

|           |           |           |           |           |           |           |           |           |           |
|-----------|-----------|-----------|-----------|-----------|-----------|-----------|-----------|-----------|-----------|
| LP245.118 |
| 578116    | 307510    | 305124.4  | 536235    | 330563.7  | 404609.4  | 332361.1  | 182034.7  | 214807.9  | 360165    |
| 350111.2  | 346032.3  | 271055.5  | 504999.1  | 506110    | 561018.8  | 329617.8  | 151558.5  | 315650.3  | 367868.7  |
| 391485.7  | 383955.9  | 308271.4  | 493095    | 405583.3  | 435577.6  | 337535.9  | 133097.9  | 243997.1  | 425480.7  |
| 322248.9  | 298118.7  | 264882.9  | 522207.1  | 321616.1  | 607481.8  | 302531.3  | 190954.2  | 256829.3  | 358288.5  |
| 321140.8  | 292108.1  | 253719.6  | 478100.2  | 325367    | 509237.3  | 246314.4  | 206632.4  | 223915.3  | 378317.8  |

|           |           |           |           |           |           |           |           |           |           |
|-----------|-----------|-----------|-----------|-----------|-----------|-----------|-----------|-----------|-----------|
| LP245.118 |
| 260302    | 248000.1  | 371359.8  | 212621.6  | 263010.9  | 217706.3  | 267892.4  | 133965.5  | 196595.7  | 174569.4  |
| 258660.1  | 309249.2  | 323898.2  | 260125.1  | 267854.8  | 207029.7  | 338829.9  | 193039    | 182403.5  | 180802.9  |
| 316261.7  | 267758.2  | 271009.2  | 309871.6  | 283213.5  | 249085.9  | 310028.5  | 109570.2  | 216056.2  | 170682.7  |
| 269382    | 275302.7  | 284233.8  | 242575.1  | 223233.3  | 140340.9  | 258027.8  | 136185.3  | 194007.3  | 252517.7  |
| 272099    | 455126    | 341252    | 238452.7  | 197414.5  | 178618    | 308638.8  | 120828.2  | 197361.2  | 165688.3  |



|           |           |           |           |           |           |           |           |           |           |
|-----------|-----------|-----------|-----------|-----------|-----------|-----------|-----------|-----------|-----------|
| LP245.118 | LP245.117 |
| 153665.2  | 197262.7  | 129117.3  | 152557.1  | 163692.6  | 164089    | 129909.7  | 163376.9  | 151570.1  | 88383.73  |
| 163578.6  | 202167.5  | 190346    | 119669.4  | 157726.9  | 152940.6  | 104843.3  | 147274.1  | 148772.8  | 78024.42  |
| 161132.8  | 200379.7  | 149876.3  | 113704.1  | 219173.5  | 156430.8  | 112846.6  | 132003.4  | 163901.2  | 90490.56  |
| 162280.2  | 187736.8  | 158273.2  | 185168.3  | 181333.2  | 153486    | 127053.5  | 136698.1  | 160933.7  | 80718.23  |
| 135093.9  | 218675.7  | 115521.5  | 109467.8  | 217076.4  | 201467.5  | 120761.6  | 152104.4  | 224620.2  | 78667.08  |

|           |           |           |           |           |           |           |           |           |           |
|-----------|-----------|-----------|-----------|-----------|-----------|-----------|-----------|-----------|-----------|
| LP245.118 | LP245.118 | LP245.117 | LP245.118 | LP245.118 | LP245.118 | LP245.138 | LP245.138 | LP245.138 | LP245.138 |
| 127313.3  | 115067.3  | 93781.51  | 144635.4  | 233834.9  | 346773.3  | 92955.76  | 17744.16  | 17546.09  | 17782.24  |
| 115283.8  | 129477.8  | 100529.7  | 116820.6  | 246563.4  | 369973.7  | 104883.7  | 15550.72  | 15879.98  | 19961.91  |
| 97871.59  | 125072.6  | 94631.47  | 112601.7  | 205138    | 268686.7  | 91075.65  | 17478.6   | 19362.88  | 19342.92  |
| 97285.55  | 118862.9  | 121246.8  | 124331.8  | 309183    | 261424    | 103617    | 16219.4   | 16927.03  | 18363.27  |
| 98108.28  | 127346.9  | 97363.54  | 123311.6  | 155960.2  | 324209.2  | 97363.54  | 16325.81  | 20113.91  | 19851.33  |

|           |           |           |           |           |           |           |           |           |           |
|-----------|-----------|-----------|-----------|-----------|-----------|-----------|-----------|-----------|-----------|
| LP245.138 |
| 174155.9  | 188211.9  | 81126.17  | 106893.3  | 190247.6  | 23546.41  | 93777.88  | 138166.9  | 109560    | 79956.38  |
| 191371.7  | 212912.3  | 90279.8   | 103609.1  | 178289.2  | 25315.54  | 100728.6  | 147927.8  | 105543.3  | 73386.8   |
| 189923.4  | 215954.9  | 74553.11  | 100718.4  | 170958.7  | 27398.64  | 93418.16  | 128827.6  | 97048.05  | 64695.65  |
| 192769    | 188591.7  | 73088.58  | 91532.57  | 166227.3  | 23816.62  | 85538.88  | 133261.5  | 77081.59  | 61030.27  |
| 149967.2  | 198217.1  | 81741.46  | 89981.92  | 165775.1  | 22007.77  | 86655.98  | 119695.5  | 83331.29  | 63354.18  |

|           |           |           |           |           |           |           |           |           |           |
|-----------|-----------|-----------|-----------|-----------|-----------|-----------|-----------|-----------|-----------|
| LP245.138 |
| 135090.8  | 28143.75  | 41775.57  | 35925.4   | 26247.63  | 105902.8  | 15687.64  | 58602.03  | 134263.8  | 39877.94  |
| 137724.1  | 30971.28  | 43843.22  | 32612.6   | 26670.09  | 114113.7  | 17721.72  | 58306.8   | 159305.2  | 36116.64  |
| 121898    | 31934.43  | 41458.37  | 30955.97  | 26100.68  | 100439.6  | 13893.86  | 52813.5   | 139782    | 36344.21  |
| 127843.9  | 25280.63  | 39030.68  | 33047.86  | 26566.54  | 102028.6  | 12488.42  | 48383.5   | 119400.9  | 35829.5   |
| 114484.3  | 27683.19  | 37833.43  | 28591.71  | 25792.39  | 99135.95  | 12992.58  | 49504.98  | 121535.6  | 38152.86  |

|           |           |           |           |           |           |           |           |           |           |
|-----------|-----------|-----------|-----------|-----------|-----------|-----------|-----------|-----------|-----------|
| LP245.138 |
| 170136.5  | 23934.87  | 24313.16  | 173759.6  | 46208.61  | 27970.22  | 148947.4  | 321174.9  | 29680.31  | 119690.1  |
| 182571.9  | 25034.49  | 29787.45  | 186287.6  | 55370.47  | 28162.03  | 145578.4  | 315964.2  | 26209.77  | 143226.9  |
| 180378.3  | 26906.9   | 24130.66  | 154100.4  | 42783.04  | 25853.16  | 132854.2  | 309892.7  | 33722.15  | 132271.9  |
| 157515.4  | 22885.63  | 19197.06  | 158451.5  | 35864.37  | 27393.21  | 141780.5  | 305848.7  | 26613.37  | 123751.8  |
| 165849.5  | 21188.5   | 21798.55  | 184098.6  | 41992.95  | 26563.65  | 154398.1  | 304246.5  | 26822.27  | 128407.3  |

|           |           |           |           |           |           |           |           |           |           |
|-----------|-----------|-----------|-----------|-----------|-----------|-----------|-----------|-----------|-----------|
| LP245.138 | LP245.192 | LP245.193 | LP245.193 | LP245.193 | LP245.193 | LP245.193 | LP245.193 | LP245.194 | LP245.193 |
| 144426.1  | 33321.37  | 34741.9   | 34183.81  | 32180.56  | 33641.47  | 38860.53  | 32250.83  | 39441.11  | 27035.19  |
| 129365.1  | 34424.98  | 36408.67  | 35163.13  | 31817.55  | 32872.42  | 31628.26  | 32166.64  | 34675.77  | 26491.73  |
| 128676.5  | 34940.99  | 32811.28  | 37688.55  | 29382.5   | 32648.71  | 40552.43  | 35497.96  | 47117.6   | 26350.36  |
| 132131.5  | 36966.47  | 39558.73  | 41528.52  | 35174.44  | 30813.93  | 32666.25  | 38512.08  | 41770.61  | 24028.58  |
| 134008.8  | 46339.95  | 55773     | 40335.87  | 44880.85  | 43164.3   | 50266.02  | 55215.11  | 56806.14  | 33917.32  |

|           |           |           |           |           |           |           |           |           |           |
|-----------|-----------|-----------|-----------|-----------|-----------|-----------|-----------|-----------|-----------|
| LP245.193 | LP245.193 | LP245.194 | LP245.193 | LP245.193 | LP245.193 | LP245.193 | LP245.194 | LP245.193 | LP245.194 |
| 32740.88  | 36183.85  | 51367.54  | 46473     | 38115.13  | 34100.32  | 40505.97  | 45871.63  | 58869.77  | 43028.05  |
| 29451.85  | 32602.23  | 42091.17  | 48203.34  | 41163.61  | 32381.72  | 36090.79  | 36861.76  | 55988.02  | 44037.42  |
| 28589.56  | 37525.91  | 47039.52  | 48413.98  | 43070.12  | 31504.86  | 45381.77  | 39117     | 61085.5   | 43136.09  |
| 33497.38  | 34212.35  | 48602.57  | 46186.3   | 42949.16  | 33002.19  | 41904.11  | 43992.35  | 60555.34  | 45761.8   |
| 37544.55  | 44769.79  | 64482.83  | 62649.06  | 54572.76  | 50377.44  | 71463.5   | 59763.71  | 86789.75  | 59521.09  |

|           |           |           |           |           |           |           |           |           |           |
|-----------|-----------|-----------|-----------|-----------|-----------|-----------|-----------|-----------|-----------|
| LP245.194 | LP245.194 | LP245.193 |
| 39477.08  | 37791.15  | 44869.83  | 32273.05  | 26526.12  | 27898.53  | 32325.96  | 30272.14  | 41172.25  | 38227.77  |
| 36782.38  | 37095.26  | 37802.47  | 27898.4   | 29195.48  | 28025.02  | 28474.67  | 34097.79  | 38642.13  | 33968.03  |
| 35963.18  | 43733.03  | 54052.78  | 27322.96  | 28484.1   | 29665.75  | 33961.14  | 30917.65  | 46244.36  | 38593.78  |
| 38245.26  | 41894.71  | 50491     | 26063.77  | 32157.62  | 26904.17  | 30838.59  | 30548.33  | 42283.69  | 35425.52  |
| 52157.88  | 57215.92  | 65641.4   | 40809.98  | 40356.72  | 34053.45  | 43491.99  | 39124.22  | 61943.13  | 50505.15  |



|           |           |           |           |           |           |           |           |           |           |
|-----------|-----------|-----------|-----------|-----------|-----------|-----------|-----------|-----------|-----------|
| LP245.193 | LP245.194 |
| 45326.39  | 36134.89  | 22720.36  | 37704.92  | 28122.55  | 26997.3   | 25642.58  | 30787.31  | 45843.57  | 35308.54  |
| 47428.44  | 34875.93  | 24115.97  | 36461.36  | 25671.88  | 28929.97  | 29116.74  | 28869.07  | 41488.13  | 39051.12  |
| 50714.69  | 34600.35  | 27137.3   | 31792.59  | 29534.13  | 30003.89  | 25001.11  | 32551.83  | 41905.54  | 47248.07  |
| 52976.71  | 38540.32  | 25205.64  | 39238.34  | 27712.3   | 31078.38  | 26473.91  | 37707.29  | 43539.66  | 45373.02  |
| 67542.1   | 56889.56  | 33286.74  | 49510.23  | 34648.45  | 38683.69  | 38744.89  | 47009.23  | 62180.2   | 56559.31  |

|           |           |           |           |           |           |           |           |           |           |
|-----------|-----------|-----------|-----------|-----------|-----------|-----------|-----------|-----------|-----------|
| LP245.193 | LP245.193 | LP245.193 | LP245.193 | LP245.194 | LP245.194 | LP245.193 | LP246.170 | LP246.170 | LP246.170 |
| 32405.21  | 31409.3   | 61973.18  | 32228.8   | 42847.11  | 47830.42  | 42526.69  | 36936.49  | 21138.79  | 22881.92  |
| 25044.23  | 33656.11  | 60023.58  | 26416.97  | 43832.26  | 52375.97  | 38667.26  | 32157.23  | 25085.87  | 27786.91  |
| 33132.56  | 36925.97  | 59018.96  | 32084.56  | 41633.91  | 55779.64  | 35647.68  | 29910.96  | 23487.37  | 22779.14  |
| 32232.85  | 32861.4   | 61237.22  | 37326.24  | 42712.26  | 60798.62  | 37582.7   | 35306.49  | 18754.55  | 25279.9   |
| 36576.52  | 48598.61  | 83919.09  | 41835.12  | 57348.24  | 67198.85  | 53993.84  | 32024.81  | 21813.27  | 23105.86  |

|           |           |           |           |           |           |           |           |           |           |
|-----------|-----------|-----------|-----------|-----------|-----------|-----------|-----------|-----------|-----------|
| LP246.169 | LP246.169 | LP246.170 |
| 40637.43  | 33388.19  | 27958.16  | 34514.59  | 39835.06  | 31901.04  | 35515.79  | 21079.02  | 39317.4   | 31702.76  |
| 46146.75  | 35047.44  | 31277.45  | 29293.35  | 41066.79  | 33607.5   | 36620.49  | 24189.97  | 33960.01  | 37289.14  |
| 45453.31  | 35528.29  | 29431.29  | 31868.07  | 41957.81  | 33980.13  | 34410.91  | 27390.54  | 34537.91  | 36228.66  |
| 41758.29  | 37446.48  | 33582.16  | 28471.75  | 46034.83  | 27597.09  | 33427.43  | 22373.26  | 33499.85  | 36862.49  |
| 43265.98  | 36976.67  | 29068.79  | 33747.62  | 46797.04  | 30805.17  | 30245.84  | 25146.32  | 37590.93  | 27770.82  |

|           |           |           |           |           |           |           |           |           |           |
|-----------|-----------|-----------|-----------|-----------|-----------|-----------|-----------|-----------|-----------|
| LP246.170 | LP246.17_ | LP246.170 | LP246.170 | LP246.170 | LP246.17_ | LP246.169 | LP246.170 | LP246.170 | LP246.170 |
| 39537.4   | 35519.52  | 27867.52  | 29733.91  | 44817.22  | 32542.08  | 35213.92  | 36136.68  | 31055.02  | 26972.5   |
| 35418.16  | 37892.31  | 25318.49  | 34465.11  | 43781.86  | 27824.75  | 39007.43  | 35817.72  | 33650.99  | 23937.08  |
| 36770.88  | 38387.26  | 26260.67  | 31569.86  | 45758.12  | 29992.67  | 39809.35  | 36604.16  | 31331.08  | 26828.93  |
| 41223.39  | 37378.02  | 25483.39  | 33102.84  | 43502.38  | 27980.95  | 40477.36  | 36346.56  | 29998.7   | 25357.44  |
| 35668.7   | 35553.3   | 27610.54  | 29539.78  | 41363.33  | 28008.11  | 41961.08  | 39936.7   | 31895.96  | 28046.26  |

|           |           |           |           |           |           |           |          |           |           |
|-----------|-----------|-----------|-----------|-----------|-----------|-----------|----------|-----------|-----------|
| LP246.170 | LP246.17 | LP246.170 | LP246.170 |
| 40010.86  | 38970.78  | 32541.25  | 38672.37  | 41309.09  | 25439.68  | 35760.27  | 37013.37 | 53542.82  | 26232.35  |
| 41077.59  | 37641.61  | 39809.66  | 37301.26  | 44601.03  | 28118.02  | 34211.55  | 40387.48 | 54693.05  | 28901.19  |
| 43182.96  | 32728.08  | 33799.76  | 32591.38  | 40287.78  | 27372.47  | 36327.42  | 37439.15 | 52074.93  | 31009.75  |
| 40639.49  | 31147.43  | 37902.61  | 41839.71  | 49460.75  | 27601.65  | 36788.35  | 38732.42 | 54257.84  | 30622.8   |
| 40253.03  | 34323.4   | 32476.77  | 36045.74  | 44005.67  | 26481.83  | 32804.81  | 35150.62 | 54894.01  | 26926.68  |

|           |           |           |           |          |           |           |           |           |           |
|-----------|-----------|-----------|-----------|----------|-----------|-----------|-----------|-----------|-----------|
| LP246.170 | LP246.170 | LP246.170 | LP246.170 | LP246.17 | LP246.170 | LP246.169 | LP246.170 | LP246.170 | LP246.242 |
| 42980.39  | 34035.81  | 33710.48  | 24581.7   | 42936.51 | 45727.59  | 34214.24  | 38484.05  | 39178.42  | 43445.67  |
| 40874.23  | 38335.35  | 33431.02  | 24994.05  | 42536.86 | 46972.74  | 34509.24  | 39368.38  | 41518.82  | 46056.18  |
| 41047.26  | 32664     | 34901.29  | 21429.97  | 44928.87 | 47831.78  | 37551.6   | 38533.82  | 39451.81  | 45532.53  |
| 41154.04  | 35299.41  | 36748.5   | 22092.04  | 39604.02 | 44958.42  | 39347.85  | 38869.2   | 40893.28  | 46679.95  |
| 42521.29  | 30014.97  | 32579.55  | 27359.44  | 40020.4  | 49993.58  | 36320.35  | 38589.9   | 40426.73  | 45163.62  |

|           |           |           |           |           |           |           |           |           |           |
|-----------|-----------|-----------|-----------|-----------|-----------|-----------|-----------|-----------|-----------|
| LP246.243 | LP246.242 | LP246.242 | LP246.945 | LP247.206 | LP247.206 | LP247.206 | LP247.226 | LP247.242 | LP247.242 |
| 34428.34  | 48627     | 34986.4   | 13573.59  | 35329.65  | 26212.58  | 23435.72  | 50844.57  | 15709.59  | 32508.61  |
| 33592     | 45962.79  | 37330.96  | 12115.59  | 33611.71  | 23939.73  | 21643.09  | 54191.75  | 14016.56  | 35615.89  |
| 36373.46  | 44365.07  | 35127.17  | 11742.69  | 28421.45  | 27769.4   | 25181.54  | 49141.33  | 15076.39  | 32151.03  |
| 38929.2   | 40653.69  | 36831.48  | 8108.876  | 26110.98  | 23759     | 24919.7   | 49665.7   | 15284.51  | 39907.66  |
| 32501.4   | 44658.56  | 31327.84  | 12745.56  | 37142.1   | 31273.4   | 24890.31  | 46913.89  | 17061.88  | 35843.51  |

|           |           |           |           |           |           |           |           |           |           |
|-----------|-----------|-----------|-----------|-----------|-----------|-----------|-----------|-----------|-----------|
| LP247.242 | LP247.943 | LP247.943 | LP248.059 | LP248.149 | LP248.149 | LP248.149 | LP248.149 | LP248.149 | LP248.149 |
| 42019.52  | 17217.16  | 12521.88  | 24464.84  | 26896.9   | 35702.55  | 47400.04  | 30185.94  | 29202.16  | 28997.36  |
| 36931.06  | 16795.86  | 9659.169  | 28433.73  | 18658.53  | 31039.92  | 50379.91  | 32410.55  | 26845.49  | 34423.88  |
| 41219.65  | 21640.03  | 14895.04  | 24674.05  | 27278.57  | 32192.69  | 43027.17  | 40094.35  | 27450.53  | 34214.33  |
| 35939.62  | 22921.36  | 18379.7   | 23848.83  | 27967.16  | 36054.16  | 48833.71  | 30966.66  | 29402.76  | 36155.23  |
| 41816.23  | 16190.95  | 12603.44  | 22450.71  | 22946.64  | 37560.89  | 49999.38  | 30099.57  | 31377.72  | 33157.36  |



|           |           |           |           |           |           |           |           |           |           |
|-----------|-----------|-----------|-----------|-----------|-----------|-----------|-----------|-----------|-----------|
| LP248.149 |
| 33949.81  | 46878.6   | 41071.85  | 32110.95  | 29772.76  | 39050.38  | 36351.81  | 36261.52  | 21366.69  | 37735.44  |
| 35634.99  | 44006.83  | 43932.17  | 34137.17  | 24712.21  | 42474.04  | 30433.13  | 35498.34  | 28989.28  | 31939.08  |
| 36851.8   | 44022.39  | 44211.02  | 34437.79  | 29851     | 42378.87  | 30344.86  | 34417.28  | 26348.52  | 32753.1   |
| 39956.38  | 39747.14  | 45374.04  | 36286.9   | 26489     | 42163.05  | 31164.89  | 27453.52  | 21316.48  | 29987.68  |
| 36677.37  | 41397.23  | 45708.52  | 33160.46  | 29123.79  | 42907.29  | 39630.64  | 34266.04  | 21589.13  | 35517.7   |

|           |           |           |           |           |           |           |           |           |           |
|-----------|-----------|-----------|-----------|-----------|-----------|-----------|-----------|-----------|-----------|
| LP248.149 |
| 32790.75  | 31775.85  | 33427.66  | 40447.22  | 28037.89  | 42729.75  | 37350.51  | 35001.16  | 31742.79  | 27084.14  |
| 34822.45  | 29177.66  | 30369.12  | 40786.05  | 27922.36  | 42884.82  | 39660.76  | 33812.44  | 36032.58  | 23264.32  |
| 34256.3   | 32734.28  | 30942.89  | 40488.21  | 30994.64  | 40486.54  | 39933.86  | 33890.15  | 32793.6   | 24937.42  |
| 29541.89  | 28566.04  | 26902.81  | 40906.99  | 28036.44  | 43133.77  | 41562.56  | 37585.89  | 33692.63  | 27935.92  |
| 32054.05  | 32536.9   | 26828.63  | 39637.18  | 32666.22  | 44650.1   | 36779.74  | 36122.74  | 35899.21  | 24006.39  |

|           |           |           |           |           |           |           |           |           |           |
|-----------|-----------|-----------|-----------|-----------|-----------|-----------|-----------|-----------|-----------|
| LP248.149 |
| 31351.54  | 30855.61  | 48779.42  | 36635.83  | 34626.39  | 35489.73  | 30777.93  | 31144.47  | 42966.47  | 40262.22  |
| 28105.67  | 34051.71  | 49944.56  | 31477.38  | 34789.14  | 31235.68  | 37973.94  | 31317.92  | 37229.63  | 30419.96  |
| 31078.65  | 30244.54  | 47248.78  | 28462.47  | 34124.61  | 33281.17  | 36353.12  | 30403.53  | 41550.69  | 36516.53  |
| 26765.64  | 35039.85  | 50015.39  | 33890     | 38961.55  | 32480.63  | 34373.83  | 31974.87  | 38493.14  | 38232.37  |
| 32348.86  | 32934.24  | 54708.14  | 32238.08  | 35266.62  | 35322.82  | 34244.63  | 31599.64  | 41199.16  | 32731.52  |

|           |           |           |           |           |           |           |           |           |           |
|-----------|-----------|-----------|-----------|-----------|-----------|-----------|-----------|-----------|-----------|
| LP248.149 |
| 33685.05  | 36427.17  | 30059.29  | 47268.05  | 41930.7   | 61101.62  | 25509.13  | 38951.71  | 36415.32  | 29504.84  |
| 39117.26  | 37545.95  | 32896.09  | 47237.61  | 41247.51  | 64855.8   | 28555.4   | 40510.61  | 37976.73  | 32423.48  |
| 31547.53  | 33034.21  | 31323.34  | 43619.44  | 41830.16  | 64233.15  | 29610.49  | 41555.62  | 41567.14  | 33174.01  |
| 38242.16  | 32117.03  | 25996.69  | 49488.18  | 40149.45  | 63147.78  | 24674.04  | 41587.35  | 35789.51  | 31363.72  |
| 38748.03  | 37290.79  | 24983.14  | 52128.69  | 39414.21  | 64148.52  | 24289.73  | 40754.11  | 36443.61  | 29033.87  |

|           |           |           |           |           |           |           |           |           |           |
|-----------|-----------|-----------|-----------|-----------|-----------|-----------|-----------|-----------|-----------|
| LP248.149 | LP249.148 | LP249.148 |
| 39170.1   | 47647.33  | 37962.07  | 26646.11  | 49267.71  | 45988.62  | 26976.19  | 29498.07  | 36393.15  | 43034.93  |
| 40534.77  | 47473.13  | 33064.29  | 28131.97  | 54423.47  | 44425.48  | 28469.69  | 30385.94  | 50453.76  | 25807.6   |
| 37573.97  | 51272.47  | 31470.78  | 25909.96  | 49781.81  | 43744.12  | 30685.6   | 33137.63  | 40379.15  | 38053.21  |
| 43829.29  | 47202.76  | 37037.91  | 23851.76  | 55705.85  | 42210.32  | 30090.92  | 30500.82  | 40416.44  | 35595.08  |
| 43004.42  | 53057.93  | 38957.17  | 25733.92  | 53237.74  | 43970.48  | 27025.11  | 29914.29  | 34333.11  | 36154.72  |

|           |           |           |           |           |           |           |           |           |           |
|-----------|-----------|-----------|-----------|-----------|-----------|-----------|-----------|-----------|-----------|
| LP249.148 | LP249.169 |
| 31722.47  | 30132.52  | 32404.76  | 36114.4   | 30612.19  | 36329.47  | 26925.76  | 29344.43  | 33724.77  | 39596.21  |
| 32930.1   | 38653.68  | 37752.74  | 46051.15  | 50057.94  | 40830.81  | 25703.27  | 25889.16  | 29533.96  | 41312.99  |
| 28459.7   | 27562.68  | 31823.73  | 44367.55  | 31371.04  | 33415.04  | 22140.46  | 27220.94  | 26051.87  | 37161.36  |
| 29244.04  | 30893.13  | 30858.86  | 40126.93  | 35681.19  | 39239.11  | 27427.05  | 31202.35  | 27881.49  | 38688.64  |
| 29949.69  | 32297.58  | 37911.72  | 41332.67  | 36040.01  | 41618.87  | 24467.67  | 30328.95  | 31367.37  | 34798.29  |

|           |           |           |           |           |           |           |           |           |           |
|-----------|-----------|-----------|-----------|-----------|-----------|-----------|-----------|-----------|-----------|
| LP249.185 | LP249.184 | LP249.184 | LP249.185 | LP249.185 | LP249.185 | LP249.184 | LP249.184 | LP249.185 | LP249.184 |
| 49621.97  | 66732.88  | 51458.26  | 33717.05  | 48202.38  | 62849.27  | 30668.28  | 31208.78  | 48471.06  | 28974.88  |
| 47739.71  | 63548.99  | 47492.85  | 30281.08  | 45165.74  | 64003.27  | 43184.81  | 32162.26  | 48101.37  | 36960.85  |
| 49047.79  | 70588.74  | 51303.76  | 31706.83  | 49010.2   | 62510.72  | 35764.91  | 30544.57  | 51775.92  | 28179.51  |
| 62935.19  | 61310.88  | 50485.09  | 32396.81  | 59488.46  | 70194.47  | 30805.32  | 28497.62  | 46625.21  | 34972.82  |
| 49414.03  | 79037.46  | 52795.17  | 34436.96  | 49373.99  | 62139.7   | 46300.99  | 32399.92  | 56708.74  | 42078.49  |

|           |           |           |           |           |           |           |           |           |           |
|-----------|-----------|-----------|-----------|-----------|-----------|-----------|-----------|-----------|-----------|
| LP249.185 | LP249.185 | LP249.184 | LP249.184 | LP249.184 | LP249.184 | LP249.184 | LP249.221 | LP249.221 | LP249.221 |
| 46218.56  | 56600.6   | 32329.27  | 44494.45  | 61702.5   | 33141.92  | 47492.82  | 55965.03  | 45512.91  | 47682.25  |
| 49654.73  | 55036.68  | 37193.79  | 46945     | 63486.27  | 35764.37  | 53740.61  | 21465.67  | 32919.96  | 34592.93  |
| 47275.03  | 58229.14  | 43087.72  | 47013.35  | 59844     | 28026.01  | 54635.38  | 59218.59  | 53469.07  | 43662.07  |
| 51210.75  | 65516.06  | 38953.74  | 46419.86  | 77392.99  | 35665.75  | 49747.05  | 35607.72  | 43044.34  | 46319.56  |
| 55967.98  | 60685.41  | 37090.48  | 50416.24  | 60629.39  | 38778.33  | 54948.39  | 67520.3   | 54977.9   | 51187.29  |



|           |           |           |           |           |           |           |           |           |           |
|-----------|-----------|-----------|-----------|-----------|-----------|-----------|-----------|-----------|-----------|
| LP249.221 | LP249.257 | LP249.915 | LP250.086 | LP250.178 | LP251.000 | LP251.000 | LP251.000 | LP251.000 | LP251.000 |
| 42112.11  | 13928.41  | 16155.59  | 16290.13  | 10128.41  | 131260.2  | 148464.1  | 151119.6  | 123131.2  | 97392.89  |
| 46566.37  | 8936.776  | 13816.23  | 12953.42  | 9717.484  | 169641    | 140454.4  | 182366.9  | 129729.1  | 115567.3  |
| 49425.68  | 18052.36  | 11260.87  | 16168.72  | 10968.14  | 213853.8  | 139294.7  | 199940    | 121844.2  | 109089.5  |
| 24008.03  | 11580.67  | 11787.79  | 13260.24  | 10131.05  | 154164.1  | 135206.4  | 153916.2  | 140063.3  | 118876.4  |
| 46192.25  | 16900.59  | 14906.48  | 14608.17  | 7171.097  | 122450    | 129597.4  | 131053    | 139943.8  | 91481.4   |

|           |           |           |           |           |           |           |           |           |           |
|-----------|-----------|-----------|-----------|-----------|-----------|-----------|-----------|-----------|-----------|
| LP250.999 | LP251.000 | LP251.000 | LP251_8.0 | LP251.000 | LP251.000 | LP250.999 | LP251.000 | LP251.000 | LP251.000 |
| 105149.5  | 136815.5  | 148993.7  | 108582.6  | 118343.9  | 168422.5  | 88309.74  | 93034.23  | 165375.7  | 146960.9  |
| 87854.84  | 176434.2  | 181949.1  | 103570.7  | 185031    | 136734.9  | 107980.4  | 127819.4  | 155941.8  | 158127.2  |
| 100768.7  | 170075.9  | 143758.5  | 140424.9  | 114839.5  | 136260.2  | 112644.3  | 84721.51  | 161963.7  | 146483.4  |
| 146407.4  | 201119.9  | 185329.7  | 112054.8  | 115928.2  | 180919.6  | 121946.4  | 93727.4   | 167977.3  | 165513.4  |
| 116222.7  | 168572.2  | 129389.9  | 106745.8  | 116837.4  | 142430.8  | 162312    | 90353.99  | 151932    | 144790.5  |

|           |           |           |           |           |           |           |           |           |           |
|-----------|-----------|-----------|-----------|-----------|-----------|-----------|-----------|-----------|-----------|
| LP251.000 | LP251_8.6 | LP251.000 |
| 145366.1  | 118684.3  | 139092.8  | 114468.1  | 138460.8  | 113899.1  | 138023.1  | 151082.2  | 114391.7  | 154164.2  |
| 153459.8  | 111608.2  | 145618.6  | 111240.3  | 124674.1  | 112237.3  | 149068    | 145476.2  | 118643.8  | 133391.5  |
| 131545.7  | 113281.4  | 154952.3  | 109891.4  | 141641.1  | 119522.7  | 130602.2  | 163733.6  | 122476.1  | 127418.8  |
| 145674.4  | 111923.7  | 152271.1  | 117208.1  | 147476    | 118460    | 150971.1  | 149754.3  | 124000.4  | 119461.7  |
| 144177.4  | 108871.4  | 171727.6  | 105820.5  | 149569.4  | 121339.3  | 152961.1  | 159810.9  | 136580.3  | 123233.9  |

|           |           |           |           |           |           |           |           |           |           |
|-----------|-----------|-----------|-----------|-----------|-----------|-----------|-----------|-----------|-----------|
| LP251.000 |
| 164772.5  | 105416.2  | 122478    | 125403.1  | 135069    | 102220.3  | 113083.3  | 115965.1  | 97628     | 150463.2  |
| 171211.5  | 116436.6  | 118159.3  | 127121.7  | 124486    | 104537.9  | 95440.84  | 107495.7  | 100097.1  | 154247.9  |
| 144120.5  | 145441.3  | 121124.6  | 128683.1  | 132530    | 105011.9  | 120553.2  | 123337.1  | 137130.7  | 154040.7  |
| 171441.6  | 104200.4  | 136288.4  | 134241.3  | 145504.4  | 103970.5  | 110080.8  | 107594.4  | 112657.9  | 151076.2  |
| 174618.9  | 105871    | 120255.1  | 134121.2  | 139905.1  | 97089.45  | 108684.7  | 112841.9  | 110335.5  | 155434    |

|           |           |           |           |           |           |           |           |           |           |
|-----------|-----------|-----------|-----------|-----------|-----------|-----------|-----------|-----------|-----------|
| LP251.000 | LP251.000 | LP251.000 | LP250.999 | LP251.000 | LP251.000 | LP251.000 | LP251_3.5 | LP251.000 | LP251_3.6 |
| 94162.34  | 128569.1  | 146033.9  | 92033.42  | 133413.2  | 90030.72  | 80207.35  | 85449.96  | 83160.29  | 83647.79  |
| 88849.64  | 156353    | 139822.7  | 77604.8   | 132560.6  | 89969.37  | 73710.98  | 77055.03  | 82355.23  | 82507.08  |
| 99203.27  | 148277.7  | 132979.5  | 90489.91  | 121127.7  | 99152.57  | 74468.86  | 76339.2   | 82089.42  | 81206.82  |
| 91983.3   | 148430    | 143194.8  | 89451.09  | 124791.4  | 96578.7   | 75775.22  | 79934.03  | 85066.62  | 81131.3   |
| 86247.52  | 147169.9  | 141829.4  | 83976.29  | 132697.6  | 92217.67  | 73178.34  | 77288.28  | 84964.76  | 80148.72  |

|           |           |           |           |           |           |           |           |           |           |
|-----------|-----------|-----------|-----------|-----------|-----------|-----------|-----------|-----------|-----------|
| LP251.000 | LP251.000 | LP251.000 | LP251_3.7 | LP251.000 | LP251.046 | LP251.127 | LP251.126 | LP251.127 | LP251.127 |
| 95280.97  | 69922.73  | 90224.55  | 72940.5   | 83313.45  | 21518.34  | 68107.6   | 49914.42  | 68958.57  | 66641.2   |
| 95312.89  | 64386.61  | 91878.44  | 80828.68  | 77866.93  | 21426.17  | 69018.19  | 58973.64  | 70965.96  | 65795.33  |
| 97865.31  | 73789.24  | 92118.35  | 77206.86  | 85163.49  | 26071.24  | 80067.62  | 54151.28  | 71092.49  | 65579.85  |
| 99423.51  | 66738.39  | 92236.19  | 77829.69  | 79184.53  | 81258.31  | 75436.56  | 50556.62  | 63985.35  | 58716.25  |
| 95121.95  | 69433.45  | 95283.06  | 82336.5   | 74844.93  | 79960.39  | 64872.62  | 67729.15  | 72925.65  | 57856.79  |

|           |           |           |           |           |           |           |           |           |           |
|-----------|-----------|-----------|-----------|-----------|-----------|-----------|-----------|-----------|-----------|
| LP251.127 | LP251.126 | LP251.127 | LP251.127 |
| 67459     | 120088.3  | 81283.81  | 76369.6   | 60560.58  | 81271.49  | 76996.77  | 49792.98  | 50207.67  | 74546.7   |
| 66543.01  | 124759.6  | 79044.67  | 78914.51  | 59090.76  | 77051.07  | 78504.87  | 50735.87  | 51494.5   | 79096.36  |
| 66733.65  | 117075.3  | 83039.22  | 75730.38  | 57647.21  | 86743.49  | 75121.49  | 63657.42  | 55541.06  | 76941.57  |
| 60647.63  | 108262.5  | 79781.27  | 74081.01  | 68404.08  | 73087.63  | 68366.93  | 46346.46  | 55667.38  | 70211.61  |
| 73003.09  | 115650    | 73865.26  | 73181.27  | 65072.69  | 81877.79  | 75655.69  | 44569.54  | 50371.88  | 69970.71  |

|           |           |           |           |           |           |           |           |           |           |
|-----------|-----------|-----------|-----------|-----------|-----------|-----------|-----------|-----------|-----------|
| LP251.127 | LP251.127 | LP251.127 | LP251.127 | LP251.125 | LP251.127 | LP251.127 | LP251.127 | LP251.125 | LP251.126 |
| 57296.02  | 55169.01  | 51756.29  | 49954.29  | 55613.22  | 76817.53  | 71622.6   | 61868.93  | 35366.8   | 71249.69  |
| 57345.11  | 58221.29  | 56777.05  | 57820.43  | 53036.17  | 73020.53  | 63871.97  | 76361.13  | 33123.11  | 72115.01  |
| 64795.64  | 66333.64  | 55244.4   | 49869.92  | 61612.9   | 73296.57  | 72386.63  | 71723.88  | 38836.41  | 80244.25  |
| 59007.25  | 56236.46  | 56602.99  | 50186.95  | 65869.67  | 79203.02  | 66476.31  | 67532.08  | 38958.35  | 80488.87  |
| 56169.21  | 55429.56  | 49592.7   | 50318.14  | 48438.49  | 70615.29  | 59433.45  | 61799.71  | 32791.34  | 69564.37  |



|           |           |           |           |           |           |           |           |           |           |
|-----------|-----------|-----------|-----------|-----------|-----------|-----------|-----------|-----------|-----------|
| LP251.127 | LP251.126 | LP251.125 | LP251.127 | LP251.128 | LP251.128 | LP251.128 | LP251.127 | LP251.127 | LP251.128 |
| 45586.7   | 45173.94  | 57906.35  | 69195.21  | 116559.9  | 98667.41  | 99967.41  | 99911.24  | 82540.57  | 92704.27  |
| 49784.64  | 51709.29  | 54663.19  | 70268     | 111199.4  | 103606.9  | 103540.2  | 97291.65  | 86411.44  | 93224.53  |
| 50045.6   | 49801.26  | 63723.88  | 77298.36  | 139290.7  | 100015.6  | 137546.6  | 95493.76  | 90204.55  | 99361.29  |
| 49347.34  | 52870.67  | 68611.61  | 67899.76  | 103529.2  | 86537.37  | 108601.8  | 86841.94  | 79647.3   | 93839.92  |
| 42685.11  | 48385.22  | 54835.16  | 65509.83  | 92009.65  | 87926.22  | 81963.8   | 87035.99  | 77491.67  | 88857.34  |

|           |           |           |           |           |           |           |           |           |           |
|-----------|-----------|-----------|-----------|-----------|-----------|-----------|-----------|-----------|-----------|
| LP251.128 | LP251.127 | LP251.128 | LP251.128 | LP251.128 | LP251.127 | LP251.128 | LP251.128 | LP251.127 | LP251.127 |
| 97753.79  | 67398.41  | 78428.4   | 82701.13  | 69846.46  | 86911.29  | 71680.89  | 66263.22  | 77279.13  | 64834.68  |
| 90202.46  | 84191.95  | 83335.12  | 79364.45  | 74658.28  | 70923.16  | 77464.07  | 69622.87  | 75729.61  | 62311.7   |
| 91376.71  | 70054.56  | 81207.43  | 88510.83  | 75986.82  | 70773.16  | 74339.88  | 63679.04  | 71775.23  | 58328.89  |
| 98091.95  | 89940.85  | 70114.37  | 80323.76  | 80733.17  | 99783.9   | 70821.5   | 73262.16  | 74130.94  | 59579.81  |
| 79700.65  | 65106.51  | 66845.46  | 77961.21  | 80826.69  | 57299.18  | 72700.92  | 63443.3   | 71681.65  | 56783.34  |

|           |           |           |           |           |           |           |           |           |           |
|-----------|-----------|-----------|-----------|-----------|-----------|-----------|-----------|-----------|-----------|
| LP251.128 | LP251.128 | LP251.128 | LP251.128 | LP251.128 | LP251.164 | LP251.164 | LP251.164 | LP251.164 | LP251.164 |
| 55168.91  | 59036.88  | 71398.64  | 105844.9  | 101645.6  | 68526.71  | 103348.1  | 101898.5  | 91933.81  | 77555.85  |
| 56326.79  | 57366.19  | 76450.95  | 100148.3  | 102651.4  | 85910.14  | 66644.23  | 99831.64  | 103663.9  | 58208.13  |
| 55943.56  | 56290.83  | 72526.13  | 86244.27  | 99015.86  | 83511.57  | 75055.14  | 104409    | 101480.2  | 72293.07  |
| 54140.55  | 54273.93  | 67931.53  | 95086.81  | 98044.04  | 86714.11  | 74246.51  | 106006.5  | 102791.5  | 68104.43  |
| 54807.75  | 51298.2   | 72990.25  | 122377.2  | 85557.79  | 97708.74  | 79230.46  | 126624.3  | 107917.9  | 66789.19  |

|           |           |           |           |           |           |           |           |           |           |
|-----------|-----------|-----------|-----------|-----------|-----------|-----------|-----------|-----------|-----------|
| LP251.164 | LP251.164 | LP251.164 | LP251.164 | LP251.163 | LP251.200 | LP251.200 | LP251.200 | LP251.200 | LP251.200 |
| 89969.64  | 66836.94  | 92732.23  | 125691.1  | 47872.59  | 100503.2  | 93214.17  | 75966.43  | 107343.1  | 79406.56  |
| 92094.03  | 65663.26  | 80705.19  | 121605.9  | 50713.83  | 103125.4  | 94409.05  | 58666.52  | 103109.1  | 78763.6   |
| 99256.53  | 69280.73  | 88580.55  | 124674.4  | 46225.21  | 80797.41  | 93761.63  | 73007.7   | 73292.67  | 84162.88  |
| 93555.99  | 70653.8   | 94610.57  | 119345.5  | 47258.43  | 118839.8  | 79842.98  | 62126.62  | 101110.1  | 86754.46  |
| 104405.7  | 66446.61  | 93738.93  | 123753.5  | 49138.28  | 117115.9  | 104124.1  | 66891.57  | 112141    | 87699.1   |

|           |           |           |           |           |           |           |           |           |           |
|-----------|-----------|-----------|-----------|-----------|-----------|-----------|-----------|-----------|-----------|
| LP251.200 |
| 76424.21  | 77025.97  | 60847.74  | 70298.83  | 60262.12  | 91492.72  | 70417.78  | 54643.94  | 76542.66  | 69115.1   |
| 87501.97  | 66211.09  | 59054.14  | 65932.07  | 65925.42  | 101459.7  | 75668.89  | 49224.68  | 61882.44  | 58127.02  |
| 80535.94  | 76039.96  | 59265.33  | 55590.37  | 67208.28  | 95619.08  | 73554.93  | 51067.8   | 74983.32  | 67796.51  |
| 62317.55  | 60651.35  | 51478.36  | 55825.93  | 54114.48  | 73686.32  | 70840.1   | 57585.83  | 75260.87  | 72236.63  |
| 85775.66  | 80475.99  | 55425.08  | 68333.72  | 67246.77  | 110842.7  | 86290.95  | 58451     | 74201.77  | 71864.96  |

|           |           |           |           |           |           |           |           |           |           |
|-----------|-----------|-----------|-----------|-----------|-----------|-----------|-----------|-----------|-----------|
| LP251.201 | LP251.200 |
| 82669.4   | 68523.2   | 89452.59  | 52685.25  | 65410.55  | 73404.44  | 123071.2  | 51388.63  | 89042.58  | 43861.16  |
| 80438.44  | 71163.6   | 89135.89  | 52173.75  | 73173.77  | 67768.3   | 123848    | 56506.75  | 90369.51  | 45024.41  |
| 88827.42  | 68844.29  | 93608.97  | 54118.66  | 66507.56  | 72526.12  | 121326.9  | 51729.5   | 85122.63  | 43174.95  |
| 81307.67  | 65511.92  | 90270.83  | 48339.58  | 65826.12  | 70757.96  | 126742.6  | 53528.86  | 90349.65  | 42287.79  |
| 87442.9   | 69073.6   | 99789.6   | 59659.49  | 75581.85  | 75203.35  | 131460.8  | 52251.79  | 90856.84  | 43918.21  |

|           |           |           |           |           |           |           |           |           |           |
|-----------|-----------|-----------|-----------|-----------|-----------|-----------|-----------|-----------|-----------|
| LP251.200 | LP251.200 | LP251.200 | LP251.200 | LP251.200 | LP251.237 | LP251.237 | LP251.237 | LP251.237 | LP252.008 |
| 59910.61  | 85040.94  | 48688.39  | 68919.08  | 53710.14  | 81861.58  | 76566.36  | 82872.77  | 95070.64  | 29177.28  |
| 52471.43  | 85466.43  | 45439.88  | 67942.69  | 53493.98  | 75874.06  | 82135.77  | 76751.04  | 101180.5  | 43401.99  |
| 52551.97  | 87138.24  | 47709.5   | 67459.2   | 53166.08  | 83240.29  | 83596.02  | 72683.41  | 93885.87  | 26647.18  |
| 55076.63  | 84010.39  | 44621.64  | 66522.6   | 57693.72  | 76839.04  | 78067.21  | 66590.31  | 94585.59  | 26759.62  |
| 56407.04  | 85870.3   | 50837.82  | 70646.62  | 51831.09  | 80593.43  | 86588.25  | 85432.85  | 96362.54  | 18197.13  |

|           |           |           |           |           |           |           |           |           |           |
|-----------|-----------|-----------|-----------|-----------|-----------|-----------|-----------|-----------|-----------|
| LP252.159 |
| 27193.59  | 41830.67  | 48067.35  | 44821.99  | 41802.51  | 32339.45  | 32471.49  | 28157.51  | 32758.8   | 26752.76  |
| 26642     | 46834.44  | 42005.37  | 48010     | 40284.84  | 42396.83  | 30891.79  | 28111.48  | 31708.7   | 24626.74  |
| 27081.56  | 42544.97  | 45100.27  | 47357.88  | 46178.42  | 38114.87  | 31646.58  | 28909.22  | 35418.5   | 25470.91  |
| 30562.16  | 38109.05  | 41035.56  | 45895.89  | 35550.82  | 38479.56  | 27914.38  | 33094.35  | 30967.82  | 26033.32  |
| 24491.26  | 41284.61  | 44191.42  | 47010.81  | 40695.9   | 37208.13  | 30785.86  | 25482.05  | 32860.48  | 23953.58  |



|           |           |           |           |           |           |           |           |           |           |
|-----------|-----------|-----------|-----------|-----------|-----------|-----------|-----------|-----------|-----------|
| LP252.159 |
| 26332.03  | 26276.8   | 32319.74  | 33434.06  | 28791.12  | 31337.53  | 27411.89  | 25966.47  | 17432.67  | 28108.98  |
| 23989.8   | 32749.53  | 29992.42  | 34019.91  | 26368.03  | 31267.42  | 23348.41  | 26700.4   | 16520.08  | 28316.47  |
| 21499.51  | 30813.63  | 28947.55  | 31308.48  | 24165.38  | 29158.62  | 26491.92  | 22430.19  | 21228.04  | 23846.24  |
| 24890.96  | 27791.91  | 30326.58  | 31149.01  | 24320.77  | 31929.94  | 26639.69  | 19356.73  | 18044.65  | 27248.41  |
| 22968.15  | 28584.42  | 28672.69  | 31341.55  | 24235.98  | 29951.87  | 26640.94  | 27552.75  | 18241.05  | 26879.13  |

|           |           |           |           |           |           |           |           |           |           |
|-----------|-----------|-----------|-----------|-----------|-----------|-----------|-----------|-----------|-----------|
| LP252.159 |
| 21677.05  | 33473.31  | 23948.26  | 28083.84  | 17189.38  | 24328.76  | 26134.97  | 21591.99  | 19754.72  | 22261.99  |
| 19541.47  | 33501.03  | 15923.45  | 28525     | 15855.9   | 29185.5   | 22519.49  | 24711.59  | 17510.71  | 22441.95  |
| 20796.5   | 29735.38  | 20780.15  | 28621.59  | 17665.95  | 23698.14  | 24331.86  | 24902.23  | 17907.56  | 22690.61  |
| 23285.16  | 25729.31  | 18765.37  | 28999.1   | 16218.56  | 26790.58  | 21197.77  | 22877.92  | 14601.42  | 21183.07  |
| 19598.58  | 28264.27  | 20090.74  | 23967     | 16684.42  | 25415.54  | 21790.49  | 26844.66  | 16996.48  | 22049.31  |

|           |           |           |           |           |           |           |           |           |           |
|-----------|-----------|-----------|-----------|-----------|-----------|-----------|-----------|-----------|-----------|
| LP252.159 | LP252.159 | LP252.159 | LP252.997 |
| 23759.86  | 37185.15  | 25331.8   | 84860.01  | 81935.4   | 78436.24  | 102236.1  | 108632.4  | 100875.8  | 95599.49  |
| 24324.2   | 36399.79  | 26992.54  | 63878.84  | 70352.88  | 84677.77  | 98211.51  | 73267.5   | 92671.29  | 96994.56  |
| 26164.04  | 38573.72  | 26936.9   | 69824.27  | 60189.67  | 87327.58  | 95937.29  | 57845.28  | 97330.09  | 120404.4  |
| 23993.61  | 39950.14  | 24288.73  | 66250.53  | 62865.23  | 74130.49  | 96490.18  | 60262.29  | 104154.2  | 108089.6  |
| 24368.64  | 36398.67  | 27124.65  | 67550.49  | 55341.66  | 120659.2  | 112703.1  | 107042.1  | 88714.09  | 101952.7  |

|           |           |           |           |           |           |           |           |           |           |
|-----------|-----------|-----------|-----------|-----------|-----------|-----------|-----------|-----------|-----------|
| LP252.997 |
| 56972.09  | 67278     | 81492.62  | 86512.23  | 81625.53  | 67245.24  | 82826.51  | 55170.95  | 95614.1   | 77410.03  |
| 51534.37  | 72966.71  | 84434.57  | 95008.68  | 72814.61  | 63045.41  | 84506.4   | 62189.68  | 98374.32  | 85193.53  |
| 66330.09  | 70734.89  | 90074.46  | 88952.27  | 72421.37  | 75952.9   | 78648.74  | 62550.52  | 99990.37  | 79125.3   |
| 51590.05  | 69749.08  | 89127.17  | 83702.92  | 65314.36  | 63067.82  | 78551.06  | 63135.15  | 96640.69  | 65795.15  |
| 59624.45  | 91011.01  | 87876.63  | 89123.63  | 77896.95  | 78052.62  | 94478.64  | 62776.98  | 77241.3   | 131166.7  |

|           |           |           |           |           |           |           |           |           |           |
|-----------|-----------|-----------|-----------|-----------|-----------|-----------|-----------|-----------|-----------|
| LP252.997 |
| 75343.61  | 62810.44  | 68009.94  | 50471.28  | 76624.93  | 68846.8   | 62356.01  | 53513.09  | 56125.94  | 57675.49  |
| 75875.27  | 67177.91  | 68043.69  | 49946.39  | 70741.93  | 64598.22  | 61976.35  | 55008.66  | 56358.32  | 57965.96  |
| 75863.8   | 65981.19  | 72595.05  | 72232.01  | 74210.04  | 59771.67  | 68460.89  | 54780.57  | 59435.87  | 64095.9   |
| 84576.92  | 64870.36  | 66099.21  | 48849.42  | 81649.6   | 64647.41  | 62042.48  | 52087.46  | 57440.51  | 58635.5   |
| 77118.29  | 69477.99  | 63092.19  | 45848.38  | 85482.45  | 83432.99  | 63473.99  | 51181.44  | 53635.16  | 61398.28  |

|           |           |           |           |           |           |           |           |           |           |
|-----------|-----------|-----------|-----------|-----------|-----------|-----------|-----------|-----------|-----------|
| LP252.997 | LP252.996 | LP252.997 |
| 69018.04  | 51770.56  | 71655.82  | 121726.4  | 105544.2  | 104563.7  | 93824.95  | 113039    | 78504.21  | 95490.26  |
| 75106.23  | 48751.14  | 70427.63  | 95276.74  | 113801.6  | 100510    | 101463.2  | 114329.2  | 98495.53  | 94785.89  |
| 76511.78  | 57576.31  | 74782.38  | 87542.79  | 105848.4  | 104503.5  | 102284.6  | 109812.8  | 73131.15  | 92678.97  |
| 65150.62  | 51870.61  | 69273.22  | 113293.2  | 92177.56  | 86073.68  | 99103.51  | 115308.5  | 78959.72  | 88726.59  |
| 77668.44  | 47961.56  | 75299.31  | 106828.1  | 138164    | 115135.5  | 88674.82  | 98139.92  | 84115.44  | 111371    |

|           |           |           |           |           |           |           |           |           |           |
|-----------|-----------|-----------|-----------|-----------|-----------|-----------|-----------|-----------|-----------|
| LP252.997 | LP253.104 |
| 89269.17  | 95119.95  | 94759.51  | 75848.59  | 67544.01  | 79698.89  | 105172.5  | 108708.8  | 74032.69  | 53991.55  |
| 86047.21  | 102716    | 95023.08  | 98552.29  | 69326.4   | 75651.83  | 105304.1  | 105384.6  | 74159.27  | 50475.01  |
| 103224.9  | 105325.1  | 97148.82  | 101854.9  | 71125.61  | 74834.98  | 114986.6  | 107953.5  | 80444.05  | 51696.08  |
| 101926.5  | 105186.6  | 98026.45  | 93383.61  | 68161.77  | 64106.25  | 103631.4  | 104037.8  | 65382.53  | 41622.61  |
| 101963.1  | 91799.76  | 98189.89  | 104517.1  | 93028.19  | 62965.94  | 107246.2  | 109589.3  | 68448.44  | 56300.94  |

|           |           |           |           |           |           |           |           |           |           |
|-----------|-----------|-----------|-----------|-----------|-----------|-----------|-----------|-----------|-----------|
| LP253.104 |
| 49590.69  | 54126.71  | 58445.8   | 61094.87  | 84436.85  | 73046.18  | 62533.65  | 48491.26  | 90802.85  | 74251.38  |
| 79751.13  | 80773.69  | 73923.73  | 60610.43  | 84636.58  | 67012.27  | 69678.15  | 49146     | 67650.3   | 56432.94  |
| 58127.29  | 62096.94  | 97955.45  | 72330.64  | 54081.44  | 68235.88  | 76531.54  | 61625.88  | 64341.24  | 56971.18  |
| 86435.37  | 83285.94  | 76343.58  | 65009.35  | 70104.18  | 67781.27  | 89716.73  | 87380.38  | 64130.17  | 87733.69  |
| 58276.49  | 66334.7   | 69007.88  | 63599.92  | 115081    | 69071.64  | 59374.75  | 72798.75  | 70623.59  | 58637.19  |



|           |           |           |           |           |           |           |           |           |           |
|-----------|-----------|-----------|-----------|-----------|-----------|-----------|-----------|-----------|-----------|
| LP253.104 |
| 53910.39  | 54342.36  | 54883.79  | 53532.5   | 93454.12  | 69077.27  | 52206.39  | 72239.24  | 52829.57  | 92935.71  |
| 66222.45  | 62507.57  | 76652.95  | 67472.95  | 75441.13  | 74809.69  | 81555.6   | 73347.84  | 97029     | 92202.1   |
| 43654.57  | 74160.28  | 86038.9   | 65662.46  | 79695.91  | 60180.91  | 88902.62  | 53884.13  | 71816.69  | 94812.65  |
| 69858.62  | 69406.61  | 67462.65  | 49893.5   | 53654.05  | 73366.84  | 69547.87  | 80531.96  | 86987.76  | 101277.9  |
| 74788.32  | 55531.39  | 50068.02  | 59809.92  | 84011.51  | 86377.02  | 89381.8   | 70814.95  | 117144.9  | 76581.1   |

|           |           |           |           |           |           |           |           |           |           |
|-----------|-----------|-----------|-----------|-----------|-----------|-----------|-----------|-----------|-----------|
| LP253.104 |
| 93053.01  | 61375.55  | 79282.16  | 50823.9   | 61674.3   | 61121.02  | 59678.22  | 59278.31  | 57946.64  | 67311.09  |
| 80995.44  | 64973.64  | 67438.18  | 67068.68  | 66165.15  | 71919.04  | 51449.63  | 67533.67  | 60245     | 66333.22  |
| 57904.01  | 68257.54  | 81094.56  | 55515.75  | 59089.62  | 56466.74  | 38669.82  | 56004.1   | 62343.58  | 66515.63  |
| 75147.46  | 55263.49  | 62372.21  | 80931.08  | 60334.47  | 68991.18  | 46575.15  | 88253.15  | 56786.4   | 68867.88  |
| 78939.02  | 71832.32  | 59330.23  | 50259.39  | 57452.23  | 62570.14  | 41361.02  | 63681.59  | 47562.35  | 100754.1  |

|           |           |           |           |           |           |           |           |           |           |           |
|-----------|-----------|-----------|-----------|-----------|-----------|-----------|-----------|-----------|-----------|-----------|
| LP253.104 |
| 79878.62  | 71922.74  | 53747.95  | 70277.52  | 89251.33  | 67680.33  | 61014.05  | 54137.04  | 48665.58  | 72888.3   |           |
| 54437.93  | 62224.37  | 62900.78  | 81979.38  | 80161.72  | 58400.46  | 55207.11  | 60755.52  | 58713.26  | 79061.98  |           |
| 74685.33  | 83449.39  | 58339.52  | 64928.64  | 73104.72  | 64449.02  | 53103.07  | 68794.54  | 61881.02  | 63441.38  |           |
| 80826.67  | 67680.57  | 48324.2   | 47136.1   | 80128.37  | 67385.94  | 56135.17  | 98299.66  | 60813.87  | 78476.57  |           |
| 61785.2   | 57078.88  | 68307.69  | 66381.73  | 47192.5   | 45755.8   | 58964.66  | 68622.65  | 68837.56  | 83628.43  |           |

|           |           |           |           |           |           |           |           |           |           |
|-----------|-----------|-----------|-----------|-----------|-----------|-----------|-----------|-----------|-----------|
| LP253.104 | LP253.105 | LP253.104 | LP253.104 |
| 48620.33  | 55445.37  | 64129.83  | 78688.61  | 52980.42  | 67950.81  | 75440.27  | 49255.26  | 68286.2   | 51134.96  |
| 48152.33  | 59771.48  | 62662.88  | 63534.73  | 57148.35  | 74253.5   | 77682.33  | 73719.3   | 54992.71  | 58950.15  |
| 55079.99  | 55971.33  | 69542.27  | 66582.54  | 57914.3   | 78712.94  | 60843.58  | 50570.13  | 53902.89  | 62594.15  |
| 48045.62  | 87011.64  | 73026.93  | 53265.57  | 54883.2   | 50446.5   | 90968.14  | 86855.85  | 54042.13  | 63528.38  |
| 41327.66  | 57563.71  | 67538.46  | 65630.85  | 61365.98  | 88670.92  | 60539.36  | 59187.48  | 72080.25  | 56027.43  |

|           |           |           |           |           |           |           |           |           |           |
|-----------|-----------|-----------|-----------|-----------|-----------|-----------|-----------|-----------|-----------|
| LP253.104 |
| 65401.95  | 55511.35  | 32500.02  | 56020.74  | 62522.91  | 73506.55  | 60780.62  | 47883.24  | 70961.36  | 59722.64  |
| 68228.8   | 62975.93  | 40747.54  | 70549.23  | 63734.64  | 72808.12  | 56946.48  | 51589.08  | 79437.85  | 65741.9   |
| 75391.14  | 105515.2  | 46339.67  | 72795.49  | 74629.15  | 82108.91  | 44660.53  | 44316.89  | 78445.9   | 63493.03  |
| 64827.12  | 66186.54  | 42711.26  | 61341.98  | 60234.44  | 70979.33  | 63971.59  | 48580.93  | 57658.06  | 58476.95  |
| 61559.65  | 53528.58  | 28546.03  | 67093.8   | 53508.66  | 85513.41  | 36809.64  | 35449.57  | 74579.41  | 59190.85  |

|           |           |           |           |           |           |           |           |           |           |
|-----------|-----------|-----------|-----------|-----------|-----------|-----------|-----------|-----------|-----------|
| LP253.104 |
| 76144.82  | 99044.91  | 74732.24  | 63055.2   | 38394.14  | 98243.12  | 54283.82  | 83760.21  | 43378.12  | 50654.43  |
| 94293.21  | 101304    | 70489.61  | 70556.7   | 42529.15  | 108115.7  | 51620.59  | 79062.02  | 42080.73  | 44115.26  |
| 80248.22  | 97136.83  | 70430.4   | 78628.48  | 46288.03  | 72765.9   | 54460.51  | 71075.51  | 48607.31  | 52038.31  |
| 87624.64  | 67639.98  | 74059.83  | 82020.36  | 37949.6   | 57320.69  | 46950.37  | 69325.27  | 53275.67  | 53455.94  |
| 64359.46  | 70517.26  | 58633.95  | 82776.46  | 34638.51  | 117332.5  | 43780.93  | 61258.91  | 39531.78  | 50053.62  |

|           |           |           |           |           |           |           |           |           |           |
|-----------|-----------|-----------|-----------|-----------|-----------|-----------|-----------|-----------|-----------|
| LP253.104 | LP253.142 | LP253.142 |
| 63066.69  | 54235.92  | 64383.11  | 47117.87  | 40881.08  | 52587.76  | 60948.29  | 108274.6  | 84843.38  | 85829.64  |
| 56515.07  | 58565.08  | 55807.59  | 42427.32  | 51695     | 57883.46  | 52321.9   | 109741.6  | 88540.19  | 88095.72  |
| 76038.85  | 62393.97  | 68688.26  | 42786.58  | 53997.35  | 52003.11  | 64770.8   | 106305.1  | 84654.61  | 87123.97  |
| 59075.48  | 64325.53  | 68325.4   | 46978.65  | 53947.3   | 57772.06  | 61563.24  | 100402.1  | 80606.39  | 82040.82  |
| 51349.53  | 58257.56  | 64934.59  | 43895.15  | 37065.39  | 41653.4   | 57299.55  | 88083.76  | 82846.21  | 85066.8   |

|           |           |           |           |           |           |           |           |           |           |           |
|-----------|-----------|-----------|-----------|-----------|-----------|-----------|-----------|-----------|-----------|-----------|
| LP253.142 | LP253.142 | LP253.143 |
| 72723.85  | 66500.98  | 80325.29  | 65274.22  | 117354    | 83151.48  | 64696.61  | 64393.56  | 70283.02  | 68553.76  |           |
| 78146.87  | 73104.62  | 79147.47  | 69132.42  | 142972.7  | 92249.4   | 62270.54  | 62737.51  | 66236.32  | 72355.67  |           |
| 67218.93  | 72434.67  | 75979.42  | 61085.05  | 122714.2  | 90152.44  | 58516.48  | 55381.32  | 71351.42  | 68861.26  |           |
| 76636.41  | 70056.57  | 76148.78  | 74725.27  | 112366.4  | 95762.69  | 58820.07  | 71099.27  | 71581.27  | 70217.41  |           |
| 67860.32  | 70519.16  | 66386.85  | 89063.38  | 100889.6  | 99656.68  | 66530.66  | 62050.33  | 76350.38  | 75881.99  |           |



|           |           |           |           |           |           |           |           |           |           |
|-----------|-----------|-----------|-----------|-----------|-----------|-----------|-----------|-----------|-----------|
| LP253.143 | LP253.143 | LP253.143 | LP253.142 | LP253.143 | LP253.143 | LP253.143 | LP253.143 | LP253.143 | LP253.143 |
| 76823.66  | 95426.47  | 81413.04  | 54488.48  | 90342.11  | 58319.6   | 68664.18  | 77408.63  | 77596.89  | 53959.05  |
| 75317.46  | 92682.13  | 85725.5   | 51977.25  | 89032.44  | 56951.53  | 66374.2   | 69802.67  | 72402.8   | 55853.81  |
| 72377.28  | 94475.15  | 87848.08  | 52482.04  | 87370.59  | 58483.63  | 61911.87  | 69632.87  | 75587.89  | 58201.62  |
| 88049.35  | 86744.68  | 82047.92  | 50943.49  | 88881.43  | 56261.33  | 77418.02  | 67626.11  | 71952.41  | 49477.62  |
| 75776.64  | 93202.19  | 81527.58  | 50995.46  | 89127.19  | 79147.73  | 65453.74  | 75252.81  | 73477.28  | 55285.74  |

|           |           |           |           |           |           |           |           |           |           |
|-----------|-----------|-----------|-----------|-----------|-----------|-----------|-----------|-----------|-----------|
| LP253.143 | LP253.143 | LP253.143 | LP253.142 | LP253.143 | LP253.143 | LP253.142 | LP253.143 | LP253.143 | LP253.162 |
| 75310.29  | 73484.43  | 49817.78  | 85507.13  | 50337.19  | 86827.38  | 72883.16  | 76394.69  | 100362    | 75048.65  |
| 68955.43  | 65584.66  | 54098.68  | 94947.5   | 50907.09  | 91937.65  | 65918.08  | 75527.8   | 107362    | 70968.72  |
| 66020.36  | 64723.37  | 46885.3   | 89202.63  | 54357.04  | 84673.2   | 75775.45  | 76322.38  | 96225.03  | 70557.08  |
| 72752.17  | 66273.68  | 52065.11  | 83702.88  | 54327.02  | 90312.88  | 66718.94  | 76961.58  | 101073.5  | 76642.48  |
| 72615     | 65391.07  | 49485.21  | 88414.1   | 54539.01  | 84314.73  | 65853.82  | 78505.39  | 105411.9  | 82696.72  |

|           |           |           |           |           |           |           |           |           |           |
|-----------|-----------|-----------|-----------|-----------|-----------|-----------|-----------|-----------|-----------|
| LP253.18_ | LP253.179 | LP253.179 | LP253.18_ | LP253.179 | LP253.179 | LP253.179 | LP253.179 | LP253.179 | LP253.179 |
| 102812.6  | 110353.7  | 82279.2   | 108235.4  | 78475.2   | 104075.1  | 78621.43  | 102928.7  | 55252.59  | 108479.1  |
| 82402.51  | 100877    | 81089.03  | 109143.4  | 88648.42  | 107428.5  | 72411.89  | 109932.3  | 52384.82  | 107601.5  |
| 98533.47  | 94967.1   | 87983.96  | 107089.4  | 89693.97  | 100350.2  | 78008.73  | 100356.6  | 60355.51  | 117734.2  |
| 104499.7  | 109382.8  | 92923.25  | 115354.2  | 88702.64  | 97188.87  | 80375.17  | 103146.9  | 56763.54  | 115653.4  |
| 112049.9  | 121869.9  | 96959.4   | 136350.2  | 98488.79  | 111034.6  | 90569.81  | 115470.5  | 62867.44  | 128891.3  |

|           |           |           |           |           |           |           |           |           |           |
|-----------|-----------|-----------|-----------|-----------|-----------|-----------|-----------|-----------|-----------|
| LP253.179 | LP253.179 | LP253.179 | LP253.180 | LP253.180 | LP253.18_ | LP253.179 | LP253.18_ | LP253.18_ | LP253.179 |
| 101586.9  | 91012.43  | 103947.7  | 69660.68  | 84243.71  | 86065.55  | 87223.12  | 127497.8  | 101923.9  | 85984.31  |
| 103528.3  | 92051.1   | 98273.84  | 68292.19  | 81140.58  | 85645.13  | 94246.22  | 121806    | 96936.69  | 83004.54  |
| 111857.9  | 92961.19  | 97796.52  | 70760.12  | 83466.95  | 94751.18  | 85554.19  | 124072.3  | 102021.2  | 85361     |
| 111395.4  | 93355.7   | 106036.4  | 75088.19  | 85742.74  | 95821.56  | 94540.08  | 125801.7  | 108922.8  | 92789.87  |
| 119913.6  | 101694.1  | 111547.3  | 83070.65  | 92414.86  | 105162.9  | 107056.7  | 149962    | 116625.1  | 103360.4  |

|           |           |           |           |           |           |           |           |           |           |
|-----------|-----------|-----------|-----------|-----------|-----------|-----------|-----------|-----------|-----------|
| LP253.179 | LP253.18_ | LP253.179 | LP253.179 | LP253.179 | LP253.18_ | LP253.180 | LP253.179 | LP253.179 | LP253.179 |
| 94124.99  | 94480.16  | 86636.14  | 104871.3  | 91069.05  | 94714.53  | 107639.7  | 97058.51  | 101869.9  | 103720.6  |
| 100273.7  | 86900.7   | 93510.04  | 101102.3  | 95315.29  | 103854.8  | 107043.5  | 101086.1  | 91688.78  | 106103.2  |
| 101523.8  | 92786.05  | 86303.72  | 100106.6  | 91733.24  | 113136.2  | 119821.8  | 107584.7  | 97197.5   | 97590.83  |
| 95959.26  | 98809.94  | 86628.42  | 112511    | 102340.8  | 107873.1  | 117696.6  | 103098.9  | 105118    | 102584.9  |
| 111131    | 104641.1  | 104666.6  | 126695.7  | 103059.8  | 123445.8  | 132696.9  | 112893.5  | 107043.9  | 115256.6  |

|           |           |           |           |           |           |           |           |           |           |
|-----------|-----------|-----------|-----------|-----------|-----------|-----------|-----------|-----------|-----------|
| LP253.179 | LP253.179 | LP253.179 | LP253.179 | LP253.179 | LP253.216 | LP253.216 | LP253.216 | LP253.216 | LP253.216 |
| 72051.73  | 104563.9  | 75287.72  | 80512.48  | 70959     | 83762.44  | 113979.6  | 98906.55  | 85352.31  | 97775.34  |
| 73679.56  | 97310.4   | 65259.76  | 87346.64  | 77015.76  | 88298.91  | 119170.5  | 107192.3  | 81315.97  | 95928.1   |
| 79560.12  | 109004.8  | 80117.35  | 84515.51  | 79589.99  | 71215.71  | 110214.1  | 97985     | 65630.03  | 110714.5  |
| 76875.15  | 108217.2  | 75905     | 88288.98  | 85585.7   | 91826.59  | 122526.9  | 102398.4  | 104945.3  | 103370.8  |
| 85863.4   | 122657.1  | 76331.65  | 95417.45  | 89167.96  | 85326.15  | 99390.23  | 92660.24  | 103695    | 78218.39  |

|           |           |           |           |           |           |           |           |           |           |
|-----------|-----------|-----------|-----------|-----------|-----------|-----------|-----------|-----------|-----------|
| LP253.216 | LP253.215 |
| 101414.7  | 96789.41  | 102790.5  | 88247.77  | 88924.04  | 81892.81  | 109665.1  | 98108.56  | 81083.93  | 86332.68  |
| 100638.5  | 97050.92  | 96098.2   | 86970.22  | 77451.91  | 79672.5   | 123885.1  | 92078.55  | 72067.35  | 85761.15  |
| 92727.53  | 97318.78  | 106750.4  | 77549.76  | 95991.41  | 84559.84  | 119642.3  | 96122.11  | 73132.48  | 87211.73  |
| 91992.5   | 105928.8  | 76926.95  | 88803.39  | 62548.15  | 88172.96  | 118690.5  | 68688.78  | 48765.73  | 87707.15  |
| 77101.69  | 124650.2  | 89779.73  | 98534.98  | 96990.43  | 86052.77  | 123768.3  | 110929.2  | 82594.39  | 63783.65  |

|           |           |           |           |           |           |           |           |           |           |           |
|-----------|-----------|-----------|-----------|-----------|-----------|-----------|-----------|-----------|-----------|-----------|
| LP253.216 | LP253.216 | LP253.216 | LP253.216 | LP253.217 | LP253.216 | LP253.216 | LP253.216 | LP253.216 | LP253.216 | LP253.216 |
| 80606.5   | 91783.95  | 63853.24  | 62233.32  | 77458.89  | 107872.5  | 88739.55  | 60960.33  | 81607.46  | 85428.29  |           |
| 84890.2   | 91343.19  | 66849.53  | 62077.6   | 66897.44  | 108364    | 87290.96  | 61128.79  | 89306.98  | 84864.83  |           |
| 84323.7   | 97284.05  | 63780.32  | 63604.03  | 66436.73  | 108264.2  | 98125.81  | 60979.75  | 57946.17  | 84171.37  |           |
| 82004.41  | 94005.82  | 63763.4   | 69754.23  | 72245.91  | 110840.6  | 100885.8  | 57254.55  | 87226.46  | 83562.39  |           |
| 92481.8   | 109591.7  | 80516.37  | 64452.75  | 74430.81  | 119203.1  | 67097.69  | 70529.59  | 99832.16  | 87679.05  |           |



|           |           |           |           |           |           |           |           |           |           |
|-----------|-----------|-----------|-----------|-----------|-----------|-----------|-----------|-----------|-----------|
| LP253.216 | LP253.216 | LP253.216 | LP253.216 | LP253.216 | LP253.216 | LP253.218 | LP253.252 | LP253.252 | LP253.252 |
| 115958.6  | 108166.7  | 69696.53  | 81287.69  | 88901.78  | 83688.31  | 67680.42  | 29008.63  | 32032.42  | 36174.84  |
| 103002.1  | 103101.3  | 70230.39  | 72300.3   | 85195.99  | 89702.53  | 72422.81  | 25721.98  | 33827.02  | 24248.95  |
| 109495.6  | 111352.4  | 79556.1   | 78859.95  | 88031.8   | 82664.91  | 70984.38  | 28003.77  | 32745.54  | 26787.92  |
| 114129.8  | 116147.3  | 69210.78  | 78583.95  | 84762.8   | 86103.1   | 77594.79  | 31186.09  | 30045.02  | 24668.99  |
| 119905    | 124703.3  | 86103.28  | 88100.79  | 103558.2  | 99300.32  | 79306.33  | 25750.03  | 34654.19  | 27212.79  |

|           |           |           |           |           |           |           |           |           |           |
|-----------|-----------|-----------|-----------|-----------|-----------|-----------|-----------|-----------|-----------|
| LP253.252 | LP253.253 | LP253.252 | LP253.252 | LP254.175 | LP254.174 | LP254.183 | LP254.183 | LP254.247 | LP255.084 |
| 28661.17  | 28667.71  | 33592.74  | 32124.54  | 23743     | 31911     | 13068.71  | 17146.48  | 21334.63  | 107322.7  |
| 30162.8   | 31484.66  | 31798.55  | 24854.25  | 27027.58  | 34481.11  | 12704.33  | 18052.69  | 21095.86  | 108818    |
| 29916.83  | 30660.34  | 33288.45  | 27776.75  | 27209.5   | 35246.85  | 10949.29  | 16384.42  | 19957.55  | 104970.4  |
| 27966.27  | 31316.64  | 30229.76  | 33286.02  | 24675.79  | 27991.77  | 11563.37  | 15109.84  | 18721.06  | 114134.1  |
| 35138.74  | 31547.46  | 34676.53  | 28448.05  | 30337.78  | 28102.97  | 12936.78  | 17860.44  | 18275.93  | 89488.59  |

|           |           |           |           |           |           |           |           |           |           |
|-----------|-----------|-----------|-----------|-----------|-----------|-----------|-----------|-----------|-----------|
| LP255.120 |
| 129882.6  | 141038.5  | 105498.3  | 121925.6  | 100569.8  | 79283.14  | 104348.5  | 118638.5  | 112863.1  | 99505.36  |
| 137323.5  | 88455.9   | 133885.4  | 117052.2  | 103741.1  | 103774.7  | 99333.97  | 131445.8  | 110391    | 82066.24  |
| 116186.9  | 102671.7  | 113688.8  | 148592.3  | 91633.9   | 103561.4  | 164634    | 183484.5  | 108208.1  | 120444.3  |
| 79296.2   | 113045.4  | 121754    | 142283.9  | 145432.9  | 84203.31  | 100249    | 156513.8  | 95700.02  | 78191.81  |
| 81640.55  | 103486    | 107757.5  | 126287.8  | 95650.21  | 74200.23  | 97461.87  | 100987.3  | 111794.6  | 91982.6   |

|           |           |           |           |           |           |           |           |           |           |
|-----------|-----------|-----------|-----------|-----------|-----------|-----------|-----------|-----------|-----------|
| LP255.120 |
| 104563.6  | 108884.1  | 96005.23  | 118589.2  | 130502.5  | 107609.3  | 121801.8  | 124356.7  | 89459.92  | 88317.21  |
| 101062.3  | 111335.3  | 88626.57  | 123981.2  | 85107.77  | 104532.2  | 119392.3  | 110214.8  | 95266.34  | 60555.41  |
| 98038.57  | 108638.6  | 72581.45  | 125467.5  | 112238.5  | 112554.5  | 140792.7  | 164173    | 91526.2   | 64485.59  |
| 91982.04  | 101658.7  | 85780.8   | 134155.4  | 87371.69  | 110421.3  | 157174.8  | 122059.8  | 143338.1  | 63593.39  |
| 101366.5  | 99982.22  | 92090.66  | 126448.3  | 108865.1  | 118015.8  | 109667.2  | 112379.8  | 88409.69  | 72903.59  |

|           |           |           |           |           |           |           |           |           |           |
|-----------|-----------|-----------|-----------|-----------|-----------|-----------|-----------|-----------|-----------|
| LP255.120 |
| 95648     | 121575.5  | 99762.95  | 101630.3  | 114753.4  | 96832.29  | 125514    | 94823.19  | 101669    | 109258.9  |
| 97608.5   | 176696    | 95587.6   | 117262.7  | 111085.5  | 95824.8   | 136568.4  | 136221.8  | 100699.2  | 124223.8  |
| 103937    | 122712.9  | 111388.4  | 84202.51  | 133858.9  | 88827.12  | 130849.1  | 87729.39  | 107144    | 108578    |
| 117319.2  | 181863.2  | 120123.8  | 137162.9  | 139784.6  | 108193.5  | 152343.1  | 84127.82  | 103342.4  | 102586.5  |
| 86396.24  | 102480.7  | 96678.56  | 92167.13  | 118068.8  | 87808.43  | 122590.3  | 73605.89  | 104727.4  | 110775.1  |

|           |           |           |           |           |           |           |           |           |           |
|-----------|-----------|-----------|-----------|-----------|-----------|-----------|-----------|-----------|-----------|
| LP255.120 |
| 114841.1  | 89170.56  | 91814.5   | 110152.4  | 125461.7  | 111820.6  | 99600     | 108485.9  | 171417    | 108381.3  |
| 118501.8  | 79625.28  | 90058.41  | 105175.3  | 126000    | 102164.1  | 93617.39  | 108740.3  | 155914.6  | 104595.1  |
| 121848.9  | 81488.74  | 99730.84  | 121804.8  | 121340.5  | 149277    | 118330.2  | 111205    | 210788.1  | 112689.8  |
| 109104.4  | 81053.29  | 80423.35  | 98395.35  | 119288.2  | 107526.4  | 111905    | 132862.6  | 166884    | 109904.9  |
| 105771.4  | 75652.92  | 90718.3   | 106955.2  | 104580.9  | 112579.6  | 102613.6  | 125143.3  | 161103.4  | 109280.2  |

|           |           |           |           |           |           |           |           |           |           |
|-----------|-----------|-----------|-----------|-----------|-----------|-----------|-----------|-----------|-----------|
| LP255.120 |
| 94686.34  | 79425.69  | 121597.8  | 111732.8  | 107867    | 120648.6  | 92512.94  | 84274.26  | 107888    | 92597.05  |
| 84049.38  | 77746.53  | 165769.8  | 121367    | 112414    | 113218.4  | 95211.6   | 79769.08  | 122653.1  | 80743.25  |
| 91607.36  | 111038.5  | 108139.3  | 167962.8  | 107227.3  | 119593.4  | 100684.1  | 87372.65  | 101469.9  | 82711.62  |
| 125392.3  | 95090.92  | 122682    | 128453.1  | 97605.6   | 136158.9  | 103407.4  | 87924.84  | 115323.3  | 80484.85  |
| 72234.16  | 67282.52  | 127734    | 98667.84  | 100946.6  | 116243.1  | 96239.73  | 76146.7   | 94017.88  | 80397.04  |

|           |           |           |           |           |           |           |           |           |           |
|-----------|-----------|-----------|-----------|-----------|-----------|-----------|-----------|-----------|-----------|
| LP255.120 |
| 154367.1  | 85012.19  | 96196.81  | 85295.28  | 111147.1  | 70028.73  | 99686.25  | 102431.9  | 107819.9  | 106068.3  |
| 127794    | 79341.25  | 137786.7  | 78091.41  | 98237.86  | 66010.31  | 143866.5  | 106120.8  | 93953.85  | 99106.69  |
| 150381.4  | 78108.94  | 97282.07  | 75864.86  | 112669.9  | 72502.08  | 125146.7  | 90234.79  | 105201.9  | 121194.7  |
| 169817.9  | 95282.37  | 128801.6  | 82116.44  | 102987.1  | 77360.09  | 117838    | 98157.72  | 102826.2  | 100522    |
| 132649.3  | 82323.01  | 102057.7  | 73327.54  | 94119.95  | 66709.07  | 92016.76  | 93319.32  | 93103.97  | 99359.83  |



|           |           |           |           |           |           |           |           |           |           |
|-----------|-----------|-----------|-----------|-----------|-----------|-----------|-----------|-----------|-----------|
| LP255.120 | LP255.159 | LP255.159 |
| 86860.68  | 130991.3  | 114808.1  | 106125.6  | 68841.47  | 70372.06  | 93747.25  | 90210.03  | 157018.3  | 187778.4  |
| 87480.41  | 132641.5  | 109518.1  | 92648.25  | 73490.46  | 75861.53  | 94625.26  | 89927.53  | 186172.5  | 181423.9  |
| 105568    | 146278.1  | 124372.1  | 110018.7  | 67308.64  | 82711.21  | 91630.42  | 95963.78  | 160241.5  | 188419.7  |
| 132506.7  | 144784.8  | 138707.4  | 112360    | 79271.25  | 79469.46  | 100872.5  | 93068.1   | 164978.9  | 195367.6  |
| 80221.72  | 129147.8  | 109946.8  | 101470.7  | 74933.46  | 71997.03  | 89489.01  | 89154.79  | 164854.6  | 202902.6  |

|           |           |           |           |           |           |           |           |           |           |
|-----------|-----------|-----------|-----------|-----------|-----------|-----------|-----------|-----------|-----------|
| LP255.158 | LP255.159 | LP255.159 | LP255.158 | LP255.159 | LP255.159 | LP255.159 | LP255.159 | LP255.159 | LP255.159 |
| 109494.9  | 165064.4  | 180797.1  | 90191.86  | 135285.9  | 107070.2  | 141640.7  | 168056.2  | 136734    | 91757.12  |
| 104819.6  | 144159.6  | 127682.9  | 98691.81  | 143315.6  | 112075.5  | 144781.6  | 158548.2  | 129902.4  | 80985.79  |
| 103806.2  | 157950.5  | 182581.7  | 104474.5  | 142971    | 117787.4  | 153129.9  | 157540    | 132718.7  | 80959.11  |
| 104770    | 166905.4  | 188566.6  | 102310.2  | 150045.8  | 119761.1  | 152355.8  | 165832.9  | 146644    | 89550.11  |
| 115038.4  | 172420.2  | 194244.2  | 97358.65  | 142913.5  | 119731.5  | 143719.1  | 182290.1  | 146934.8  | 82770.01  |

|           |           |           |           |           |           |           |           |           |           |
|-----------|-----------|-----------|-----------|-----------|-----------|-----------|-----------|-----------|-----------|
| LP255.159 | LP255.174 | LP255.174 | LP255.174 | LP255.174 | LP255.174 | LP255.195 | LP255.195 | LP255.195 | LP255.195 |
| 109255.8  | 39423.29  | 46468.69  | 68373.91  | 39720.93  | 131929.4  | 206512.2  | 151386.9  | 138453.6  | 123684.1  |
| 107194    | 149435    | 144369.8  | 174393    | 129333.4  | 130287.2  | 189488.3  | 141544.7  | 136927.4  | 120087.3  |
| 113404.7  | 148710.8  | 147965.3  | 189254.1  | 141838.2  | 133958.6  | 198428.6  | 132725.9  | 137483.7  | 111631.1  |
| 111816.3  | 137549.8  | 151066.4  | 192716.1  | 137965.8  | 138739.8  | 195722.6  | 141506.9  | 142372.6  | 110789.9  |
| 124638.3  | 149010.6  | 170003.4  | 195815.2  | 137508.2  | 146731.5  | 202817.9  | 133836.3  | 160990    | 123147.9  |

|           |           |           |           |           |           |           |           |           |           |
|-----------|-----------|-----------|-----------|-----------|-----------|-----------|-----------|-----------|-----------|
| LP255.195 | LP255.195 | LP255.195 | LP255.195 | LP255.195 | LP255.195 | LP255.196 | LP255.195 | LP255.195 | LP255.195 |
| 200508.2  | 101326.3  | 208518    | 125181.3  | 118625.5  | 116735.2  | 115299    | 112029    | 106233.6  | 130798.9  |
| 216969    | 103939.6  | 208967.1  | 140554.1  | 116396    | 128742.6  | 127448.6  | 125285.3  | 111873.5  | 113105.3  |
| 228440.4  | 101754.6  | 199399.8  | 99140.82  | 63799.7   | 120634.6  | 110973.7  | 120268.4  | 116434.6  | 127066.5  |
| 112406.5  | 102128.9  | 196749.7  | 135264.7  | 127791.6  | 125445    | 106919.5  | 116311.2  | 118197    | 143794.4  |
| 247918.9  | 109048.7  | 205093.2  | 161091.1  | 137895.7  | 130155.4  | 110802.4  | 131416.6  | 121927.8  | 146589    |

|           |           |           |           |           |           |           |           |           |           |
|-----------|-----------|-----------|-----------|-----------|-----------|-----------|-----------|-----------|-----------|
| LP255.195 | LP255.195 | LP255.195 | LP255.195 | LP255.196 | LP255.195 | LP255.195 | LP255.195 | LP255.231 | LP255.232 |
| 126342    | 147297.8  | 154964.6  | 185293.9  | 176092.6  | 99116.41  | 100523.1  | 155181.7  | 117516.3  | 132596.3  |
| 127428.5  | 159898.4  | 156638.1  | 202459    | 173781.6  | 89156.52  | 105410.7  | 153574.2  | 136624.9  | 143574    |
| 130689.1  | 162423.4  | 163413.5  | 197395.3  | 182791.4  | 95280.86  | 107450.9  | 147100.9  | 135374.6  | 145652.4  |
| 129127.1  | 167027.7  | 148669.8  | 207935.3  | 193600.4  | 103786.8  | 98052.4   | 163844.2  | 125616.9  | 141000    |
| 136588.3  | 168115.7  | 166845.2  | 207125.3  | 199205.1  | 100811.2  | 102964.8  | 77257.88  | 141338.9  | 148065    |

|           |           |           |           |           |           |           |           |           |           |
|-----------|-----------|-----------|-----------|-----------|-----------|-----------|-----------|-----------|-----------|
| LP255.232 | LP255.231 | LP255.231 | LP255.231 | LP255.232 | LP255.232 | LP255.231 | LP255.231 | LP255.231 | LP255.232 |
| 171335.9  | 109808    | 142883.2  | 199354.9  | 110165.8  | 139714.4  | 138770.3  | 119456    | 132927.6  | 145833.6  |
| 159030.5  | 113593.6  | 150199.5  | 189376.2  | 113606.5  | 129322.6  | 152561.2  | 113963.7  | 142561.7  | 150159.3  |
| 170316.3  | 119581.8  | 140452.6  | 195821.8  | 110946.2  | 129999.7  | 148756.2  | 117691.8  | 140923.1  | 147877    |
| 174120.1  | 111162.7  | 133150.2  | 193394.3  | 114969.8  | 147537.8  | 140491.8  | 127077.1  | 145368.2  | 149833.3  |
| 196167.7  | 130010    | 147564.5  | 208802.1  | 122165.7  | 142185.2  | 147473.4  | 124104.4  | 156756.5  | 154526    |

|           |           |           |           |           |           |           |           |           |           |
|-----------|-----------|-----------|-----------|-----------|-----------|-----------|-----------|-----------|-----------|
| LP255.232 | LP255.231 | LP255.232 |
| 123742    | 159162.3  | 108388.3  | 117095.7  | 91705.21  | 166990.6  | 211186.9  | 107043.9  | 106786.1  | 98885.28  |
| 124791.3  | 157864    | 99694.54  | 114284.6  | 95687.37  | 162190.9  | 214437.6  | 107566.9  | 107710.8  | 106141.7  |
| 136955.9  | 165865.2  | 108579.3  | 115769.2  | 109162    | 164618.2  | 221914.9  | 105658.4  | 105166.3  | 106175.1  |
| 139131.8  | 166987.4  | 116374.5  | 122848.1  | 106952    | 166992.5  | 221374.9  | 117103.4  | 110131.7  | 109161    |
| 142151.4  | 168607.7  | 116840.3  | 118556.6  | 100069.4  | 187776.3  | 232946.2  | 116453.2  | 111022.1  | 109521.1  |

|           |           |           |           |           |           |           |           |           |           |
|-----------|-----------|-----------|-----------|-----------|-----------|-----------|-----------|-----------|-----------|
| LP255.232 | LP255.232 | LP255.232 | LP255.232 | LP255.232 | LP255.232 | LP255.231 | LP255.231 | LP256.087 | LP256.154 |
| 115880.6  | 129072.6  | 71750.92  | 152167.4  | 132413.1  | 155011.3  | 128006.9  | 143287.1  | 8954.049  | 35525.1   |
| 110264.8  | 129067.2  | 70230.63  | 158773.2  | 134953.7  | 157541.4  | 133355.1  | 141976.7  | 11400.97  | 38057.01  |
| 112943.7  | 123659.6  | 81971.11  | 160689    | 135616.9  | 157693.6  | 136478.5  | 148307.6  | 15035.28  | 33218.95  |
| 115262.8  | 137615.4  | 78660.63  | 168397    | 141806.9  | 161317    | 139231.6  | 153677.2  | 11630.95  | 38872.4   |
| 123693.8  | 145571.3  | 77442.88  | 176245.3  | 148697.3  | 169971.1  | 146313.3  | 161426.7  | 8116.187  | 38450.56  |



|           |           |           |           |           |           |           |           |           |           |
|-----------|-----------|-----------|-----------|-----------|-----------|-----------|-----------|-----------|-----------|
| LP256.235 | LP256.235 | LP256.263 |
| 46342.41  | 42377.05  | 245511.7  | 155132.9  | 140015.9  | 190281.5  | 178469.4  | 213367.6  | 113537.6  | 168470.8  |
| 44235.49  | 42430.01  | 168827.5  | 203924.5  | 108314.4  | 177603.4  | 180069.2  | 151327.4  | 118153.6  | 152511.7  |
| 50709.23  | 41439.51  | 139998.9  | 158269.6  | 155402.1  | 181274.9  | 192184.5  | 157953.7  | 113191.5  | 163566.5  |
| 47100.82  | 46150.56  | 138984.5  | 164103.2  | 176433.8  | 172293.8  | 177322.7  | 148161.8  | 103908.6  | 167813.1  |
| 50937.78  | 45737.26  | 156097.4  | 152743.9  | 176901.2  | 180459.8  | 163594.1  | 155232.3  | 111206.6  | 157939.6  |

|           |           |           |           |           |           |           |           |           |           |
|-----------|-----------|-----------|-----------|-----------|-----------|-----------|-----------|-----------|-----------|
| LP256.263 |
| 73946.78  | 142465.8  | 130247.3  | 90682.5   | 93610.31  | 96582.84  | 79919.19  | 118428.2  | 102170.8  | 127237.6  |
| 88798.81  | 123661.7  | 122692.2  | 85279.6   | 92697.54  | 94999.62  | 64808.08  | 113588.4  | 95195.7   | 117853.5  |
| 85801.48  | 130274.2  | 120040.6  | 82668.59  | 99649.93  | 104095.5  | 77555.34  | 107865    | 96414.76  | 130293.7  |
| 85023.48  | 132330    | 122455.5  | 90949.43  | 103222.8  | 97944.86  | 73722.18  | 111985.5  | 101406.6  | 122968.7  |
| 93645.82  | 183340.8  | 121066.5  | 132069.8  | 98439.55  | 105586.5  | 78897.05  | 78562.28  | 103663.7  | 121614.4  |

|           |           |           |           |           |           |           |           |           |           |
|-----------|-----------|-----------|-----------|-----------|-----------|-----------|-----------|-----------|-----------|
| LP256.263 |
| 107672.1  | 90097.07  | 115108.5  | 117376    | 108940.5  | 103105.5  | 117488.7  | 130902.6  | 107538.8  | 73614.01  |
| 107751.8  | 82570.4   | 107303    | 116396.3  | 110940.5  | 105807.1  | 132672.8  | 132385.5  | 113181.1  | 78432.14  |
| 101664.8  | 91262.68  | 115721.4  | 121386.4  | 113348.9  | 110399.4  | 115010.6  | 124795.1  | 121224.8  | 68216.29  |
| 106043    | 82394.48  | 105152.6  | 114548.2  | 117753.2  | 105181.5  | 120969.4  | 121384.8  | 109479.3  | 69520.8   |
| 107907.3  | 98840.9   | 110210.2  | 108734.6  | 109052.8  | 100335.4  | 122025.4  | 124143.2  | 106655.6  | 77803.96  |

|           |           |           |           |           |           |           |           |           |           |
|-----------|-----------|-----------|-----------|-----------|-----------|-----------|-----------|-----------|-----------|
| LP256.263 |
| 96761.89  | 78075.99  | 128798.1  | 84876.38  | 101477.9  | 84222.92  | 128874.2  | 125232.9  | 79074.57  | 118601.7  |
| 93220.93  | 76200.68  | 142111.4  | 90371.24  | 106111.1  | 77072.86  | 115113    | 149291.6  | 93775.03  | 122522.9  |
| 99243.21  | 70589.53  | 147662.3  | 94795.09  | 106918.6  | 84788.37  | 127586.8  | 139004.8  | 78733.41  | 116811.7  |
| 92260.41  | 76546.59  | 136918.6  | 89377.39  | 101253.5  | 77046.6   | 117433.2  | 123415.9  | 77755.76  | 119242.5  |
| 84640.3   | 79954.25  | 144895.2  | 83647.2   | 99998.01  | 73396.98  | 117352.5  | 123679    | 73503.66  | 123397.2  |

|           |           |           |           |           |           |           |           |           |           |
|-----------|-----------|-----------|-----------|-----------|-----------|-----------|-----------|-----------|-----------|
| LP256.263 |
| 113477.7  | 104886.8  | 56336.45  | 103042.9  | 72665.28  | 58661.82  | 74138.31  | 78458.27  | 83458.38  | 99061.64  |
| 118741.9  | 105266.8  | 70459.59  | 99189.18  | 78554.57  | 64155.86  | 71935.43  | 77869.64  | 83132.83  | 104461.6  |
| 113509.3  | 113228.2  | 58285.88  | 102803.7  | 75165.94  | 65502.45  | 79730.1   | 80628.95  | 77880.13  | 103535.4  |
| 108849    | 102027.6  | 57807.58  | 99941.41  | 73788.41  | 70860.69  | 74632.93  | 66679.19  | 71956.55  | 95128.32  |
| 109447.9  | 109780.6  | 58624.43  | 104408.9  | 76311.37  | 65001.13  | 73043.27  | 77315.93  | 76154.47  | 98898.4   |

|           |           |           |           |           |           |           |           |           |           |
|-----------|-----------|-----------|-----------|-----------|-----------|-----------|-----------|-----------|-----------|
| LP256.263 | LP256.263 | LP256.263 | LP256.263 | LP256.263 | LP257.137 | LP257.138 | LP257.138 | LP257.138 | LP257.138 |
| 135517.6  | 90541.91  | 65348.63  | 132409.9  | 81027.79  | 31383.54  | 46964.92  | 34398.43  | 34069.02  | 45295.93  |
| 136178.7  | 97936.84  | 63559.38  | 125246.1  | 83526.97  | 38196.49  | 49965.08  | 39079.26  | 34259.99  | 51693.3   |
| 135678.6  | 101463.1  | 61573.92  | 120934.5  | 84305.35  | 30739.15  | 46232.68  | 34308.17  | 37846.43  | 48909.6   |
| 134654.1  | 92828.16  | 60463.21  | 133860.8  | 86730.82  | 33793.01  | 45053.18  | 34681.58  | 36795.21  | 50159.52  |
| 129645.9  | 88489.32  | 68545.8   | 132980.5  | 70068.3   | 34159.74  | 47402.78  | 38454.79  | 36351.41  | 52071.08  |

|           |           |           |           |           |           |           |           |           |           |
|-----------|-----------|-----------|-----------|-----------|-----------|-----------|-----------|-----------|-----------|
| LP257.137 | LP257.137 | LP257.138 | LP257.174 | LP257.174 | LP257.174 | LP257.174 | LP257.174 | LP257.211 | LP257.211 |
| 38183.34  | 38907.07  | 50657.76  | 44275.13  | 27288.33  | 41129.43  | 31976.68  | 48828.83  | 35201.49  | 38021.52  |
| 31766.41  | 37623.66  | 52299.77  | 41975.49  | 21580.83  | 37814.44  | 32039.17  | 49417.18  | 28066.65  | 36176.28  |
| 37741.16  | 34419.18  | 45234.23  | 45772.44  | 26914.27  | 40238.84  | 31067.64  | 50892.05  | 32921.92  | 42475.43  |
| 37380.02  | 35630.85  | 54022.87  | 43423.52  | 29206.01  | 42637.48  | 32433.24  | 52614.85  | 26126.22  | 31400.74  |
| 32584.99  | 34674.67  | 50026.37  | 43425.56  | 29649.5   | 37043.92  | 30505.06  | 55001.71  | 34356.25  | 38015.62  |

|           |           |           |           |           |           |           |           |           |           |
|-----------|-----------|-----------|-----------|-----------|-----------|-----------|-----------|-----------|-----------|
| LP257.211 | LP257.247 | LP257.247 | LP257.247 | LP257.247 | LP257.247 | LP257.247 | LP257.266 | LP257.267 | LP257.266 |
| 31602.19  | 45837.64  | 24301.18  | 26005.95  | 36553.15  | 25888.83  | 62633.6   | 30316.4   | 27130.87  | 28863.89  |
| 32737.81  | 47761.66  | 25267.88  | 26419.34  | 23600.44  | 33010.88  | 40179.3   | 26505.36  | 42735.15  | 36644.22  |
| 34422.95  | 53890.37  | 21506.25  | 29702.01  | 31045.07  | 31988.08  | 48009.71  | 29056.25  | 31486.95  | 30423.35  |
| 26686.36  | 60091.18  | 22709.59  | 28068.08  | 28419.43  | 35635.93  | 50085.45  | 25667.8   | 32680.8   | 29575.19  |
| 30249.05  | 55997.01  | 13922.54  | 28766.09  | 29182.74  | 34721.31  | 46740.23  | 34046.03  | 27450.28  | 25422.84  |



|           |           |           |           |           |           |           |           |           |           |           |
|-----------|-----------|-----------|-----------|-----------|-----------|-----------|-----------|-----------|-----------|-----------|
| LP257.266 | LP258.097 |
| 29074.48  | 70997.7   | 45761.45  | 36721.92  | 39063.19  | 46796.52  | 20064.45  | 27563.45  | 21452.83  | 29902.96  |           |
| 28360.16  | 45314.54  | 65437.77  | 35719.47  | 40911.43  | 57865.18  | 19597.79  | 25613.47  | 22352.72  | 31582.94  |           |
| 24620.43  | 48879.26  | 63931.62  | 39622.82  | 40928.68  | 56257     | 19292.54  | 25135.75  | 21576.24  | 31077.07  |           |
| 23897.76  | 51265.53  | 73153.4   | 29593.26  | 33546.81  | 50955.1   | 19156.61  | 22301.31  | 22589.82  | 27241.01  |           |
| 30135.77  | 50292.33  | 62811.05  | 34553.89  | 40798.14  | 47009.55  | 19898.58  | 25135.33  | 20750.16  | 28330.25  |           |

|           |           |           |           |           |           |           |           |           |           |
|-----------|-----------|-----------|-----------|-----------|-----------|-----------|-----------|-----------|-----------|
| LP258.098 | LP258.097 | LP258.097 | LP258.098 | LP258.097 | LP258.098 | LP258.098 | LP258.098 | LP258.098 | LP258.097 |
| 124816.2  | 102198.3  | 120540.2  | 74509.35  | 94405.24  | 79905.23  | 80831.07  | 104559.1  | 82798.85  | 75885.47  |
| 88605.67  | 86033.23  | 100085.2  | 78766.14  | 86195.08  | 81764     | 77655.49  | 103107.6  | 80956.27  | 78995.39  |
| 129365.2  | 113177.8  | 133722.7  | 100297.5  | 75458.74  | 75334.54  | 92223.99  | 93196.67  | 100562.5  | 84015.45  |
| 92049.69  | 102312.9  | 81635.05  | 82034.84  | 99373.84  | 75803.53  | 75109.73  | 76975.1   | 109045.1  | 93452.36  |
| 83651     | 124938.4  | 90630.35  | 72622.15  | 95471.14  | 90916.21  | 91849.13  | 86326.29  | 81996.72  | 90205.83  |

|           |           |           |           |           |           |           |           |           |           |
|-----------|-----------|-----------|-----------|-----------|-----------|-----------|-----------|-----------|-----------|
| LP258.097 | LP258.098 | LP258.098 | LP258.098 | LP258.097 | LP258.097 | LP258.097 | LP258.098 | LP258.097 | LP258.097 |
| 88190.75  | 82759.09  | 115856.8  | 68483.5   | 39109.57  | 58918.2   | 87536.74  | 72104.83  | 62413.51  | 84860.45  |
| 64508.72  | 87814.06  | 88603.59  | 75079.81  | 47532.34  | 52984.07  | 81578.18  | 77364.95  | 56493.96  | 86153.24  |
| 73921.99  | 77707.43  | 81813.1   | 124904.9  | 43615.29  | 60353.57  | 106214.7  | 90836.7   | 60340.8   | 99053.81  |
| 83470.13  | 70362.17  | 92571.1   | 68240.26  | 43702.52  | 65598.74  | 77938.78  | 84489.73  | 51211.01  | 104563.4  |
| 58250.36  | 76503.71  | 112660.9  | 83379.02  | 46625.97  | 54519.29  | 109322.9  | 92123.8   | 69360.61  | 79679.13  |

|            |           |           |            |            |           |           |            |            |           |
|------------|-----------|-----------|------------|------------|-----------|-----------|------------|------------|-----------|
| LP258.097! | LP258.098 | LP258.098 | LP258.097! | LP258.098! | LP258.098 | LP258.098 | LP258.097! | LP258.097! | LP258.097 |
| 73316.93   | 71807.87  | 61476.5   | 54267.85   | 80777.86   | 82382.01  | 58191.59  | 62166.93   | 64228.13   | 51902.86  |
| 72101.32   | 61331.14  | 56846.36  | 49132.98   | 77595.91   | 91004.71  | 60336.93  | 55228.64   | 59335.86   | 51367.48  |
| 64413.53   | 70213.4   | 64247.55  | 56176.02   | 100432.4   | 93375.98  | 66993.94  | 56228.6    | 55823.09   | 63791.8   |
| 93959.3    | 58054.64  | 103112.6  | 61708.32   | 71163.72   | 78597.54  | 91384.74  | 43384.1    | 65516.04   | 61299.01  |
| 68551.45   | 76476.73  | 54133.73  | 71071.74   | 106291.6   | 88241.41  | 56670.62  | 62464.78   | 54710.59   | 57173.36  |

|           |           |           |           |           |           |           |           |           |           |
|-----------|-----------|-----------|-----------|-----------|-----------|-----------|-----------|-----------|-----------|
| LP258.098 | LP258.098 | LP258.098 | LP258.098 | LP258.097 | LP258.097 | LP258.097 | LP258.098 | LP258.097 | LP258.098 |
| 29034.31  | 81036.14  | 44144.36  | 45498.92  | 47748.42  | 42232.82  | 37683.52  | 67244.24  | 29511.34  | 27459.84  |
| 33226.02  | 70490.13  | 45470.52  | 38643.86  | 63154.51  | 44848.02  | 39596.29  | 67186.07  | 34379.63  | 29780.76  |
| 34690.62  | 53673.67  | 46038.19  | 44027.97  | 54637.38  | 45458.26  | 38456.4   | 70874.02  | 36059.1   | 33937.19  |
| 41087.98  | 101329.5  | 42190.02  | 49555.01  | 63619.13  | 37045.79  | 37570.42  | 52714.07  | 38267.62  | 30657.77  |
| 26321.02  | 71149.94  | 44327.74  | 42337.02  | 55551.05  | 44731.07  | 37886.2   | 66352.31  | 29590.97  | 31719.43  |

|            |            |            |           |            |           |            |           |           |           |
|------------|------------|------------|-----------|------------|-----------|------------|-----------|-----------|-----------|
| LP258.097! | LP258.097! | LP258.097! | LP258.098 | LP258.097! | LP258.098 | LP258.097! | LP258.098 | LP258.098 | LP258.098 |
| 51475.33   | 35224.35   | 41923.47   | 24945.73  | 31252.18   | 31713.05  | 37351.53   | 33402.54  | 26993.66  | 54223.69  |
| 46574.73   | 34330.97   | 40640.99   | 22227.41  | 30352.85   | 27441.64  | 43664.26   | 30996.78  | 27941.72  | 57813.65  |
| 42228.65   | 34729.72   | 38840.93   | 23969.69  | 30318.73   | 34216.21  | 46954.3    | 33945.74  | 24862.97  | 58680.28  |
| 46100.63   | 33688.24   | 31079.71   | 23688.14  | 32362.76   | 42079.65  | 38061.23   | 32387.78  | 26820.1   | 67726.36  |
| 45792.16   | 35969.32   | 38591.56   | 24623.7   | 30563.34   | 29779.26  | 40502.68   | 38932.63  | 24345.05  | 50922.72  |

|           |           |           |           |           |           |           |           |           |           |
|-----------|-----------|-----------|-----------|-----------|-----------|-----------|-----------|-----------|-----------|
| LP258.097 | LP258.097 | LP258.097 | LP258.098 | LP258.098 | LP258.098 | LP258.097 | LP258.098 | LP258.097 | LP258.097 |
| 43946.52  | 20790.12  | 19853.65  | 41833.81  | 45739.75  | 35757.64  | 34623.09  | 48028.02  | 30502.35  | 20317.04  |
| 37048.95  | 24462.4   | 17745.24  | 47786.52  | 45775.62  | 36354.91  | 32735.45  | 40407.17  | 28890.74  | 23263.86  |
| 40850.92  | 18554.73  | 18501.45  | 46142.76  | 45471.73  | 34495.12  | 29202.1   | 43388.33  | 29520.66  | 18958.57  |
| 37080.42  | 19492.38  | 15625.55  | 44346.95  | 49426.14  | 35003.45  | 33897.21  | 46039.89  | 28381.84  | 19816.26  |
| 37138.86  | 19510.42  | 17436.67  | 49239.24  | 43596.24  | 32160.98  | 23593.81  | 38734.57  | 32245.46  | 21132.68  |

|            |            |            |            |            |            |            |           |           |           |
|------------|------------|------------|------------|------------|------------|------------|-----------|-----------|-----------|
| LP258.097! | LP258.098 | LP258.243 | LP258.243 |
| 17876.62   | 31817.35   | 26758.08   | 32168.72   | 17441.79   | 25179.43   | 17894      | 21209.19  | 62566.19  | 32429.62  |
| 14163.38   | 37508.24   | 29068.8    | 31516.03   | 18892.42   | 25598.95   | 17262.39   | 19372.57  | 59676.99  | 29857.68  |
| 18977.99   | 36544.95   | 29244.62   | 33232.19   | 18189.35   | 25571.73   | 17557.15   | 22828.45  | 31080.35  | 28726.54  |
| 17074.77   | 38555.74   | 30788.98   | 31418.88   | 15928.02   | 30358.84   | 20172.87   | 20741.84  | 41538.72  | 28171.71  |
| 15227.32   | 28882.39   | 30223.18   | 31109.95   | 20642.53   | 23701.43   | 15719.41   | 22333.05  | 42339.15  | 29583.3   |



|           |           |           |           |           |           |           |           |           |           |
|-----------|-----------|-----------|-----------|-----------|-----------|-----------|-----------|-----------|-----------|
| LP258.243 | LP258.243 | LP258.279 | LP258.279 | LP259.066 | LP259.066 | LP259.066 | LP259.154 | LP259.154 | LP259.154 |
| 29221.54  | 31787.24  | 49540.12  | 46380.79  | 28230.58  | 24615.88  | 21794.05  | 161031.8  | 186874.4  | 189797.3  |
| 32253.35  | 29814.95  | 56409.35  | 42423.77  | 28151.31  | 30390.66  | 18776.95  | 148105.2  | 202491    | 251692.2  |
| 33481.65  | 29735.01  | 48338.85  | 41660.39  | 26756.1   | 30456.23  | 19084.06  | 159280.8  | 190305.9  | 190085.9  |
| 35589.84  | 27928.54  | 48317.82  | 36402.97  | 27942.81  | 29070.67  | 17248.11  | 138299.1  | 178728.3  | 190807.4  |
| 30043.1   | 27655.14  | 50874.29  | 37431.96  | 25785.72  | 28890.58  | 19323.21  | 145784.8  | 144287.3  | 195012.9  |

|           |           |           |           |           |           |           |           |           |           |
|-----------|-----------|-----------|-----------|-----------|-----------|-----------|-----------|-----------|-----------|
| LP259.154 |
| 197850    | 143278.4  | 184536.9  | 126878.4  | 167284.8  | 132986.8  | 103061.2  | 87433.58  | 126643.6  | 117750    |
| 186446.3  | 139864.3  | 194280    | 111144.3  | 179372.7  | 132932.6  | 131277.5  | 97767.4   | 153002.5  | 90564.77  |
| 172456.2  | 139316.7  | 185394.2  | 129668.3  | 163395.5  | 138600.2  | 94950.02  | 101601.4  | 129583.6  | 114727.6  |
| 200619    | 120862.8  | 173735    | 119645.3  | 150536.2  | 122902.7  | 97929.76  | 92033.39  | 124167.1  | 110509.4  |
| 185226.7  | 116256.8  | 170492.8  | 120744.7  | 163352.2  | 132532.1  | 98991.38  | 94224.49  | 114645.4  | 117060.1  |

|           |           |           |           |           |           |           |           |           |           |
|-----------|-----------|-----------|-----------|-----------|-----------|-----------|-----------|-----------|-----------|
| LP259.154 | LP259.153 | LP259.153 | LP259.153 |
| 127753    | 121252.8  | 123882.9  | 105613.3  | 127238.8  | 83701.37  | 116618.6  | 102105.9  | 104392.1  | 60756.18  |
| 146464.3  | 90604.5   | 103885.6  | 102251.5  | 144339.5  | 77901.44  | 110417.8  | 98781.08  | 138627.2  | 58634.51  |
| 136489    | 119415.7  | 140528.2  | 98393.17  | 128865.3  | 77244.18  | 117254.2  | 101484.8  | 106926.8  | 57905.2   |
| 116298.2  | 110258.3  | 136425.5  | 93551.42  | 132309.9  | 79316.36  | 114429.4  | 93363.91  | 97457.65  | 59424.52  |
| 123451    | 120543.2  | 133134    | 97101.83  | 140480.3  | 74480.08  | 117328.4  | 93523.42  | 103195.5  | 60509.56  |

|           |           |           |           |           |           |           |           |           |           |
|-----------|-----------|-----------|-----------|-----------|-----------|-----------|-----------|-----------|-----------|
| LP259.154 | LP259.154 | LP259.154 | LP259.154 | LP259.154 | LP259.153 | LP259.154 | LP259.153 | LP259.154 | LP259.154 |
| 108169.3  | 65028.13  | 89944.89  | 87727.44  | 93449     | 71175.78  | 76475.23  | 99811.22  | 80540.16  | 126979.2  |
| 92996.01  | 64771.98  | 106551.7  | 82326.75  | 81081.84  | 83971.42  | 82263.45  | 95132.88  | 88022.5   | 125066.3  |
| 109943.8  | 72852.08  | 87200.78  | 71798.59  | 89368.48  | 84459.19  | 76465.53  | 108479.8  | 78867.21  | 122754.4  |
| 105595.3  | 63602.51  | 87870.11  | 78862.58  | 81413.2   | 77652.87  | 73128.81  | 99958.5   | 74357.15  | 120161    |
| 100816.1  | 58651.22  | 82133.31  | 81211.76  | 91810.9   | 71808.87  | 74520.92  | 91706.56  | 79539.39  | 119235.4  |

|           |           |           |           |           |           |           |           |           |           |
|-----------|-----------|-----------|-----------|-----------|-----------|-----------|-----------|-----------|-----------|
| LP259.153 | LP259.153 | LP259.154 | LP259.154 | LP259.154 | LP259.154 | LP259.153 | LP259.154 | LP259.154 | LP259.154 |
| 37036.79  | 71815.73  | 106563.1  | 80607.17  | 43220.77  | 35635.81  | 60369.56  | 46254     | 40575.43  | 57055.11  |
| 34513.23  | 67684.91  | 113881.2  | 81972.66  | 50522.12  | 39846.86  | 57466.92  | 53461.48  | 45140.36  | 61322.27  |
| 37108.12  | 65493.57  | 116728.1  | 82678.27  | 48973.67  | 36784.92  | 61280.52  | 50331.37  | 42620.65  | 59556.17  |
| 40127.24  | 66171.58  | 106786.4  | 79494.36  | 42318.08  | 37271.3   | 61039.66  | 46028.89  | 41238.67  | 57374.59  |
| 35912.37  | 67025.42  | 104834.5  | 81149.17  | 41877.4   | 36969.77  | 59417.34  | 48178.91  | 36548.19  | 55165.72  |

|           |           |           |           |           |           |           |           |           |           |
|-----------|-----------|-----------|-----------|-----------|-----------|-----------|-----------|-----------|-----------|
| LP259.154 | LP259.169 | LP259.190 | LP259.190 | LP259.190 | LP260.147 | LP260.149 | LP260.149 | LP260.149 | LP260.148 |
| 43295.81  | 16173.68  | 179062    | 185333.5  | 40249.25  | 41229.8   | 47305.26  | 84102.77  | 58916.46  | 47050.32  |
| 36656.97  | 16973.9   | 184577.3  | 170247.8  | 38894.8   | 36783.99  | 50374.82  | 57230.04  | 63041.31  | 48876.28  |
| 40936.79  | 16804.62  | 174797.5  | 191217.1  | 46112.31  | 37729.57  | 47954.43  | 63228.09  | 59755.72  | 48415.86  |
| 38478     | 17011.12  | 183936.7  | 148655.9  | 44333.26  | 35331.83  | 54549.47  | 54787.71  | 63531.4   | 70828.59  |
| 41330.47  | 15954.45  | 160650.2  | 162661.2  | 43335.69  | 37285.6   | 46599.86  | 54859.05  | 61048.38  | 41262.85  |

|           |           |           |           |           |           |           |           |           |           |
|-----------|-----------|-----------|-----------|-----------|-----------|-----------|-----------|-----------|-----------|
| LP260.149 | LP260.149 | LP260.148 | LP260.148 | LP260.149 | LP260.149 | LP260.149 | LP260.148 | LP260.147 | LP260.148 |
| 53384.73  | 56101.93  | 48030.9   | 77414.04  | 47008.08  | 61074.64  | 53746.59  | 56641.08  | 55753.85  | 63999.99  |
| 54921.78  | 47057.6   | 43417.9   | 79102.04  | 43705.64  | 62699.52  | 51192.31  | 53534.77  | 62803.99  | 65239.06  |
| 54161.7   | 46277.53  | 43973.81  | 70031.44  | 42548.66  | 59130.1   | 49791.14  | 63754.16  | 62684.06  | 59430.37  |
| 54018.06  | 47996.77  | 47468.62  | 98967.39  | 57967.35  | 59700.73  | 57689.39  | 61297.26  | 61876.11  | 58374.36  |
| 58358.59  | 47847.82  | 45140.83  | 76057.65  | 45451.45  | 57652.42  | 48356.1   | 59996.46  | 61836.55  | 57539.15  |

|           |           |           |           |           |           |           |           |           |           |
|-----------|-----------|-----------|-----------|-----------|-----------|-----------|-----------|-----------|-----------|
| LP260.149 | LP260.149 | LP260.149 | LP260.148 | LP260.149 | LP260.149 | LP260.149 | LP260.148 | LP260.148 | LP260.149 |
| 84580.52  | 47895.91  | 47058.27  | 51970.38  | 50582.86  | 43819.9   | 60710.08  | 72588.59  | 65582.79  | 69770.19  |
| 73475.08  | 46235.6   | 53953.55  | 47047.78  | 43225.38  | 34746.29  | 42030.52  | 60947.81  | 65559.41  | 65199.11  |
| 72415.91  | 48638.54  | 49557.94  | 50042.18  | 53588.51  | 32820.45  | 45074.88  | 58837.82  | 66796.14  | 65660.57  |
| 75989     | 51264.71  | 46404.97  | 57801.19  | 60130.73  | 48029.39  | 48034.07  | 54214.16  | 54264.27  | 59051.22  |
| 74149.08  | 51259.26  | 53549.8   | 47545.5   | 44647.28  | 36813.55  | 45830.88  | 56673.19  | 60925.66  | 67015.36  |



|           |           |           |           |           |           |           |           |           |           |
|-----------|-----------|-----------|-----------|-----------|-----------|-----------|-----------|-----------|-----------|
| LP260.148 | LP260.149 | LP260.148 | LP260.149 | LP260.148 | LP260.149 | LP260.148 | LP260.148 | LP260.149 | LP260.149 |
| 46378.43  | 41068.8   | 61006.98  | 52156.16  | 40025.7   | 62742.26  | 31545.59  | 58256.92  | 67861.47  | 72710.99  |
| 57758.64  | 41819.06  | 54252.93  | 49960.56  | 36874.61  | 65081.31  | 35632.2   | 59221.54  | 73174.89  | 70359.22  |
| 56596.99  | 37066.75  | 57724.08  | 50590.72  | 38567.9   | 69388.05  | 34154.59  | 57578.7   | 67738.91  | 62745.4   |
| 75184.07  | 37690.27  | 57036.44  | 55060.4   | 41555.14  | 69536.51  | 48348.11  | 56692.25  | 63468.12  | 68462.37  |
| 48678.86  | 36610.42  | 52973.03  | 52605.81  | 35570.96  | 59616.33  | 38628.3   | 58899.54  | 74278.49  | 72291.38  |

|           |           |           |           |           |           |           |           |           |           |
|-----------|-----------|-----------|-----------|-----------|-----------|-----------|-----------|-----------|-----------|
| LP260.149 | LP260.149 | LP260.149 | LP260.148 | LP260.149 | LP260.149 | LP260.157 | LP260.157 | LP260.149 | LP260.157 |
| 52815.62  | 35732.41  | 44540.32  | 52383     | 45071.39  | 61862.91  | 52960.33  | 63488.48  | 50625.58  | 49335.76  |
| 46046.39  | 37933.56  | 40343.68  | 50035.78  | 47315.48  | 50223.39  | 23996.53  | 17563.26  | 59037.98  | 19816.92  |
| 47643.58  | 34080.55  | 37056.7   | 52171.87  | 51898.16  | 51950.25  | 23218.98  | 20330.04  | 53498.43  | 30884.93  |
| 50820.09  | 40819.69  | 35851.47  | 52561.77  | 47605.81  | 50432.6   | 22270.25  | 17179.34  | 46911.4   | 25385.08  |
| 49297.16  | 36377.46  | 29926.27  | 44062.46  | 49680.79  | 52259.6   | 22253.43  | 20810.83  | 39836.7   | 25391.72  |

|           |           |           |           |           |           |           |           |           |           |
|-----------|-----------|-----------|-----------|-----------|-----------|-----------|-----------|-----------|-----------|
| LP260.157 | LP260.153 | LP261.148 |
| 22673.3   | 25812.15  | 108601.4  | 74812.27  | 104925.9  | 94056.12  | 76176.12  | 93342.93  | 96094.99  | 52130.57  |
| 24169.41  | 31514.99  | 132358.2  | 70622.08  | 113488.9  | 140938    | 92698.69  | 99318.46  | 75676.48  | 59647.08  |
| 22391.69  | 27067.93  | 133810.9  | 78738     | 91890.4   | 89393.95  | 67811.04  | 85066.14  | 93012.7   | 52995.08  |
| 26492.54  | 52576.7   | 92690.29  | 68069.06  | 75291.85  | 82439.68  | 64395.38  | 90707.6   | 92738.29  | 49320.97  |
| 24847.18  | 27349.31  | 90672.22  | 85292.8   | 67052.86  | 86037.42  | 75496.16  | 94047.96  | 87168.28  | 50663.27  |

|           |           |           |           |           |           |           |           |           |           |
|-----------|-----------|-----------|-----------|-----------|-----------|-----------|-----------|-----------|-----------|
| LP261.148 |
| 70026.42  | 68706.56  | 91749.02  | 88368.01  | 81745.48  | 107895.6  | 105990.7  | 58152.19  | 84666.87  | 119030.3  |
| 82014.58  | 79238.68  | 89522.33  | 101281.2  | 109238.2  | 85998.8   | 86101.29  | 64705.01  | 87735.29  | 101311.9  |
| 64062.43  | 94779.72  | 62131.71  | 79034.73  | 78307.11  | 91698.7   | 113626.2  | 59708.16  | 84405.7   | 106760.1  |
| 66642.82  | 95527.42  | 59700.72  | 72017.95  | 74954.73  | 102074.9  | 101917    | 55933.91  | 75655.27  | 111099.8  |
| 71560.63  | 91347.2   | 60639.9   | 116109.9  | 85070.68  | 102701.3  | 103658.4  | 56348.48  | 77234.17  | 114272.7  |

|           |           |           |           |           |           |           |           |           |           |
|-----------|-----------|-----------|-----------|-----------|-----------|-----------|-----------|-----------|-----------|
| LP261.148 |
| 110399.4  | 58147.41  | 42979.15  | 68198.13  | 53773.25  | 63817.57  | 56626.02  | 37904.83  | 47950.91  | 70438.99  |
| 127969.6  | 73773.11  | 50563.48  | 84256.69  | 38452.48  | 74723.09  | 48809.27  | 38460.68  | 52193.42  | 70365.36  |
| 101222.4  | 54813.27  | 39978.76  | 70322.83  | 51334.06  | 62670.45  | 48797.94  | 42578.48  | 49395.93  | 65272.87  |
| 106257.4  | 54944.15  | 40995.64  | 64927.75  | 40572.6   | 58187.18  | 46196.94  | 39207.26  | 47945.47  | 65204.11  |
| 110658.3  | 52908.75  | 41941.48  | 66284.91  | 52597.64  | 59655.02  | 52047.35  | 38512.83  | 46074.65  | 62610.14  |

|           |           |           |           |           |           |           |           |           |           |
|-----------|-----------|-----------|-----------|-----------|-----------|-----------|-----------|-----------|-----------|
| LP261.148 |
| 43414.53  | 70991.68  | 59485.36  | 45523.99  | 67629.97  | 73120.67  | 43729.67  | 39830.45  | 50250.17  | 45072.38  |
| 40958.42  | 61216.39  | 55007.99  | 43341.62  | 71647.64  | 87631.37  | 45175.23  | 44018.75  | 46425.34  | 46801.58  |
| 40503.55  | 67214.47  | 61271.87  | 46636.71  | 64284.28  | 66897.14  | 39103.25  | 39877.82  | 51639.31  | 48154.61  |
| 40102.31  | 69312.42  | 55455.3   | 41626.82  | 65041.29  | 72981.33  | 48352.21  | 41460.32  | 46716.1   | 43138.4   |
| 41337.96  | 77563.16  | 53839.2   | 39909.2   | 64107.65  | 64032.62  | 38006.22  | 44320.15  | 47030.42  | 46333.43  |

|           |           |           |           |           |           |           |           |           |           |
|-----------|-----------|-----------|-----------|-----------|-----------|-----------|-----------|-----------|-----------|
| LP261.148 |
| 59623.59  | 43591.17  | 77503.07  | 51363.78  | 46588.15  | 54434.82  | 56641.65  | 60504.52  | 63693.27  | 49510.18  |
| 60464.69  | 50011.81  | 102160.8  | 61177.25  | 53388.65  | 43851.1   | 59017.13  | 55623.14  | 66053.32  | 52227.12  |
| 55940.21  | 50984.87  | 77697.53  | 48209.81  | 57421.88  | 46115.97  | 58915.15  | 59347.92  | 62031.83  | 48099.85  |
| 53706.96  | 43390.67  | 63202.4   | 47079.38  | 45435.35  | 51160.93  | 58123.03  | 57976.56  | 54136.59  | 52194.05  |
| 50665.68  | 52255.14  | 70504.14  | 56865.99  | 56178.13  | 47405.63  | 62077.18  | 57134.22  | 58837.97  | 44683.46  |

|           |           |           |           |           |           |           |           |           |           |
|-----------|-----------|-----------|-----------|-----------|-----------|-----------|-----------|-----------|-----------|
| LP261.148 |
| 29307.34  | 41554.67  | 35536.42  | 36251.01  | 58783.14  | 55229.48  | 78984.29  | 29337.21  | 62857.67  | 62250.72  |
| 30990.9   | 39886.72  | 39114.51  | 34749.59  | 61943.62  | 58028.63  | 89557.35  | 36598.73  | 59722.67  | 63072.69  |
| 30446.84  | 38974.8   | 36599.79  | 38848.34  | 55609.79  | 46436.34  | 83461.71  | 31578.83  | 57094.16  | 64559.65  |
| 26467.55  | 34967.94  | 33997.7   | 33389.88  | 48872.58  | 50588.55  | 76581.3   | 30160.6   | 63476.48  | 58904.12  |
| 31545.99  | 40104.15  | 34962.08  | 32282.58  | 56799     | 52198.34  | 76549.86  | 25804.9   | 56941.99  | 62951.85  |



|           |           |           |           |           |           |           |           |           |           |
|-----------|-----------|-----------|-----------|-----------|-----------|-----------|-----------|-----------|-----------|
| LP261.148 | LP261.148 | LP261.148 | LP261.148 | LP261.185 | LP261.185 | LP261.185 | LP261.185 | LP261.185 | LP261.185 |
| 36030.43  | 62617.9   | 39124.35  | 60026.34  | 21884.53  | 40116.38  | 28982.16  | 29004.59  | 44745.19  | 31194.82  |
| 41673.43  | 64151.81  | 43937.74  | 66691.67  | 23675.71  | 33591.85  | 24671.59  | 32458     | 43062.28  | 30363.97  |
| 35630.24  | 62273.9   | 37670.03  | 60905.44  | 21172.17  | 34493.91  | 26008.65  | 28351.53  | 48774.57  | 35349.67  |
| 35340.54  | 59245.69  | 37529.24  | 56580.91  | 20719.79  | 37106.05  | 29181.53  | 32366.87  | 46327.09  | 37166.62  |
| 37434.37  | 59776.05  | 35490.42  | 59959.08  | 23242.52  | 36102.67  | 27697.82  | 34987.64  | 49059.66  | 30469.15  |

|           |           |           |           |           |           |           |           |           |           |
|-----------|-----------|-----------|-----------|-----------|-----------|-----------|-----------|-----------|-----------|
| LP262.165 | LP262.164 | LP262.165 | LP262.165 | LP262.165 | LP262.165 | LP262.164 | LP262.164 | LP262.165 | LP262.165 |
| 55494.6   | 52213.38  | 61172.61  | 51593.01  | 66273.1   | 57701.28  | 43356.06  | 84996.81  | 52307.81  | 56147.13  |
| 65325.08  | 45028.1   | 63776.69  | 43488.03  | 66324.58  | 59264.63  | 43545.14  | 86201.84  | 53886.12  | 56634.13  |
| 63846.97  | 52804.37  | 55641.09  | 48586.33  | 64267.71  | 56403.29  | 47972.78  | 84596.86  | 48238.33  | 59325.67  |
| 57879.9   | 49328.49  | 59873.17  | 48522.13  | 63081.34  | 63537.94  | 38664.01  | 96571     | 53868.81  | 57849.77  |
| 63188.79  | 52413.12  | 57372.45  | 49697.06  | 61217.41  | 60044.15  | 45082.22  | 86166.52  | 55366.55  | 61564.61  |

|           |           |           |           |           |           |           |           |           |           |
|-----------|-----------|-----------|-----------|-----------|-----------|-----------|-----------|-----------|-----------|
| LP262.165 | LP262.165 | LP262.165 | LP262.165 | LP262.164 | LP262.165 | LP262.164 | LP262.165 | LP262.165 | LP262.165 |
| 53212.32  | 55077.75  | 107377.6  | 51036.75  | 48214.5   | 68108.02  | 73466.73  | 85924.36  | 87056.02  | 71498.21  |
| 48741.74  | 48800.68  | 99966.55  | 48918.57  | 44454     | 67367.86  | 75406.04  | 99042.08  | 96742.2   | 70560.61  |
| 52294.69  | 52319.49  | 101917.7  | 56020.04  | 51161.4   | 67010.13  | 70527.78  | 89313.17  | 89219.8   | 74483.32  |
| 54066.41  | 48525.3   | 101235.2  | 53473.92  | 45442.31  | 71875.28  | 69164.33  | 87386.71  | 93843.75  | 72127.28  |
| 54046.98  | 49517.14  | 105908.8  | 45701.52  | 50186.15  | 67217.52  | 78002.36  | 92460.75  | 90740.79  | 71356.13  |

|           |           |           |           |           |           |           |           |           |           |
|-----------|-----------|-----------|-----------|-----------|-----------|-----------|-----------|-----------|-----------|
| LP262.165 |
| 41904.75  | 60196.21  | 102008.4  | 68516.75  | 72103.63  | 54081.9   | 69699.15  | 58644.62  | 46363.87  | 68214.48  |
| 41880.11  | 59647.42  | 89794.76  | 68924.58  | 73659.79  | 52727.97  | 73795.53  | 58859.22  | 45032.16  | 75279.5   |
| 45339.46  | 56755.43  | 96020.2   | 66273.88  | 83321.53  | 51823.3   | 70974.49  | 54975.17  | 50541.92  | 71314.28  |
| 45032.84  | 65716.75  | 90426.8   | 74682.08  | 71268.49  | 57518.68  | 76834.31  | 58484.19  | 49889.17  | 76133.94  |
| 48892.32  | 55781.37  | 97072.52  | 68499.89  | 79298.62  | 57480.48  | 69127.39  | 62100.88  | 51614.93  | 77756.54  |

|           |           |           |           |           |           |           |           |           |           |
|-----------|-----------|-----------|-----------|-----------|-----------|-----------|-----------|-----------|-----------|
| LP262.165 | LP262.164 | LP262.165 | LP262.164 | LP262.165 | LP262.165 | LP262.165 | LP262.165 | LP262.165 | LP262.165 |
| 76941.07  | 71933.67  | 53224.65  | 76891.53  | 68931.93  | 72619.25  | 77264.68  | 61292.94  | 94325.38  | 61097.61  |
| 70965.2   | 67641.69  | 54891.79  | 79929.91  | 64329.47  | 65547.38  | 73048.26  | 74869.6   | 93040.45  | 60100.21  |
| 78255     | 71571.07  | 56505.84  | 81293.8   | 72337.82  | 68179.25  | 76330.61  | 69251.51  | 99965.42  | 62550.83  |
| 77944.15  | 70804.25  | 54360.26  | 72405.97  | 74721.63  | 74457.74  | 84387.99  | 69945.39  | 93787.01  | 65706.07  |
| 76023.7   | 71948.95  | 53932.7   | 75367.36  | 79746.19  | 67922.03  | 69963.24  | 69185.7   | 99954.99  | 67898.53  |

|           |           |           |           |           |           |           |           |           |           |
|-----------|-----------|-----------|-----------|-----------|-----------|-----------|-----------|-----------|-----------|
| LP262.165 | LP262.164 |
| 53512.8   | 64673.16  | 72302.93  | 54183     | 121457.5  | 52327.17  | 68873.15  | 91928.81  | 74930.76  | 70233.81  |
| 61316.72  | 70187.66  | 62405.07  | 58602.59  | 123930    | 53795.04  | 71166.39  | 91637.24  | 75132.2   | 72222.19  |
| 58903.25  | 66174.95  | 75555.6   | 55050.93  | 132322.5  | 45460.83  | 71252.5   | 87911.19  | 73257.97  | 71703.81  |
| 55456.95  | 71971.45  | 71065.65  | 54751.68  | 134071.7  | 45293.96  | 70980.52  | 99314.99  | 77026.65  | 74628.75  |
| 65299.26  | 69587.74  | 68364.62  | 55633.43  | 129040.1  | 52179.22  | 63984.93  | 97739.68  | 70049.74  | 75263.59  |

|           |           |           |           |           |           |           |           |           |           |
|-----------|-----------|-----------|-----------|-----------|-----------|-----------|-----------|-----------|-----------|
| LP262.165 | LP262.165 | LP262.165 | LP262.165 | LP262.177 | LP262.922 | LP263.200 | LP263.200 | LP263.200 | LP263.200 |
| 73560.86  | 38990.86  | 56950.83  | 71806.23  | 72812.2   | 11510.46  | 53000.21  | 49578.52  | 61144.87  | 70545.6   |
| 72567.9   | 40469.67  | 43117.67  | 71219.68  | 77930.46  | 15350.34  | 52303.67  | 55883.07  | 65530.93  | 67985.97  |
| 66531.49  | 38089.27  | 50848.14  | 66161.67  | 69651.76  | 14901.72  | 57518.04  | 51734.43  | 61511.14  | 74247.35  |
| 71153.92  | 43221.47  | 55099.48  | 69916.98  | 72566.59  | 12590.02  | 58688.92  | 50716.84  | 66704.31  | 71803.89  |
| 70616.68  | 40826.24  | 50958.67  | 74892.76  | 69317.84  | 12911.49  | 59994.62  | 49423.83  | 66353.6   | 78015.65  |

|           |           |           |           |           |           |           |           |           |           |
|-----------|-----------|-----------|-----------|-----------|-----------|-----------|-----------|-----------|-----------|
| LP263.200 | LP263.237 | LP263.237 | LP263.236 | LP263.237 | LP263.236 | LP263.237 | LP263.236 | LP263.237 | LP263.237 |
| 67326.44  | 66542.71  | 46017.45  | 55516.72  | 48664.89  | 84675.73  | 89304.54  | 50833.22  | 58344.47  | 42823.01  |
| 67581.35  | 69368.85  | 35418.69  | 60494.9   | 51316.23  | 65223.29  | 91675.85  | 50447.31  | 59695.71  | 42733.69  |
| 67118.58  | 66215.27  | 44270.21  | 54779.79  | 52207.01  | 68125.64  | 81303.56  | 49207.53  | 59101.88  | 42921.88  |
| 68267.25  | 67395.46  | 47198.79  | 61927.48  | 49182.71  | 64709.33  | 84462.01  | 57371.38  | 61755.38  | 41129.57  |
| 70889.89  | 84131.74  | 62377.76  | 67645.47  | 56848.37  | 67821.45  | 74012.12  | 66178.24  | 67226.66  | 46911.74  |



|           |           |           |           |           |           |           |           |           |           |
|-----------|-----------|-----------|-----------|-----------|-----------|-----------|-----------|-----------|-----------|
| LP263.237 | LP263.237 | LP263.237 | LP263.237 | LP263.236 | LP263.237 | LP263.236 | LP263.237 | LP263.237 | LP263.237 |
| 55832.11  | 56327.15  | 68519.53  | 53909.54  | 65087.5   | 55681.37  | 50102.1   | 31319.54  | 54757.64  | 79685.03  |
| 51136.26  | 65423.5   | 63553.9   | 56713.07  | 62150.33  | 52356.45  | 51514.98  | 27866.66  | 47419.94  | 77872.03  |
| 55972.12  | 63538.36  | 62946.6   | 59718.32  | 57562.71  | 57352.39  | 53977.96  | 30585.62  | 57551.2   | 80112.33  |
| 59193.04  | 68181.78  | 68375.97  | 56151.75  | 57592.54  | 55818.01  | 50898.79  | 34628.77  | 52005.29  | 74083.84  |
| 58691.65  | 63530.43  | 71732.21  | 62433.86  | 63045.73  | 59219.67  | 53034.66  | 31825.92  | 58941.59  | 86332.2   |

|           |           |           |           |           |           |           |           |           |           |
|-----------|-----------|-----------|-----------|-----------|-----------|-----------|-----------|-----------|-----------|
| LP263.237 | LP263.237 | LP263.237 | LP263.236 | LP263.236 | LP263.237 | LP265.142 | LP265.143 | LP265.143 | LP265.143 |
| 45320.98  | 39801.77  | 47818.99  | 58720.71  | 61601.11  | 60712.34  | 178750.5  | 170360.6  | 155127    | 132521.7  |
| 41052.68  | 39466.42  | 43587.41  | 59862.88  | 66793.8   | 71913.42  | 175309.4  | 170231.4  | 140876.1  | 124981.6  |
| 40921.99  | 44182.59  | 46766.76  | 59612.26  | 67546.07  | 63945.08  | 185983.3  | 179895.1  | 141502.4  | 122595.3  |
| 41109.94  | 43833.35  | 48570.66  | 60968.37  | 69294.68  | 65173.13  | 170494.5  | 140618.2  | 135521.3  | 107278.2  |
| 44203.9   | 43694.82  | 43539.26  | 61953.16  | 71482.21  | 66949.01  | 168176.2  | 166684    | 169243.6  | 109619.2  |

|           |           |           |           |           |           |           |           |           |           |
|-----------|-----------|-----------|-----------|-----------|-----------|-----------|-----------|-----------|-----------|
| LP265.143 |
| 212299.9  | 119381.4  | 80672.23  | 132408.3  | 60167.16  | 105677.6  | 165818.6  | 81012.88  | 81894.13  | 123617.5  |
| 164442.5  | 122743.7  | 75151.97  | 101939.3  | 57902.67  | 91964.6   | 157766.6  | 103274.2  | 91198.22  | 108107.6  |
| 163077.2  | 115690.3  | 88510.33  | 95583.42  | 47309.26  | 108568.1  | 164746.9  | 88378.7   | 90294.68  | 116224.5  |
| 236827.5  | 178520.5  | 79783.83  | 125521.1  | 94058.84  | 102033.6  | 170421    | 69982.14  | 76878.51  | 97024.08  |
| 159116.8  | 138285.1  | 78320.12  | 151999.7  | 53886.41  | 98127.29  | 173347.7  | 70169.13  | 139167.9  | 96466.43  |

|           |           |           |           |           |           |           |           |           |           |
|-----------|-----------|-----------|-----------|-----------|-----------|-----------|-----------|-----------|-----------|
| LP265.143 |
| 94816.36  | 74424.72  | 148767    | 127606    | 162157.9  | 134496.3  | 98672.07  | 119970.1  | 105525.5  | 128316    |
| 125595.1  | 81228.63  | 145774.5  | 100612.6  | 120374    | 128400    | 102474.9  | 111422.8  | 142353.5  | 126141    |
| 85749.57  | 93479.36  | 146662.8  | 105696.8  | 117721.9  | 138483.8  | 105565.8  | 126833    | 109866.7  | 134729.1  |
| 122710.1  | 70335.57  | 152710.4  | 98934.39  | 113649.8  | 131260.5  | 100313.9  | 111942.6  | 107611.8  | 106940.7  |
| 79686.23  | 104287.9  | 134824.7  | 97883.95  | 149559.5  | 119590.8  | 104827.3  | 114250    | 103822.5  | 127818    |

|           |           |           |           |           |           |           |           |           |           |           |
|-----------|-----------|-----------|-----------|-----------|-----------|-----------|-----------|-----------|-----------|-----------|
| LP265.143 |
| 39773.11  | 161993.9  | 77331.9   | 66455.65  | 92511.86  | 88707.4   | 91952.75  | 77611.37  | 131940.8  | 182228.9  |           |
| 38206.99  | 139716.8  | 75090.77  | 49790.93  | 97851.43  | 83082.46  | 97618.92  | 92580.98  | 132579.7  | 135467.4  |           |
| 40931.21  | 144824.3  | 76211.3   | 49692.34  | 98486.97  | 93962.37  | 76058.5   | 137052.6  | 133185.8  | 141940.2  |           |
| 39921.39  | 142828.4  | 72305     | 54950.02  | 94139.13  | 86904.9   | 85560.45  | 76405.25  | 130542.8  | 116288    |           |
| 35391.14  | 130061.8  | 74203.05  | 52759.46  | 93050.07  | 86933.87  | 77710.85  | 85794.92  | 127877.3  | 124973.4  |           |

|           |           |           |           |           |           |           |           |           |           |
|-----------|-----------|-----------|-----------|-----------|-----------|-----------|-----------|-----------|-----------|
| LP265.143 |
| 66840.2   | 114506.5  | 61085.99  | 99236.62  | 86942.63  | 69404.43  | 63098.08  | 83735.67  | 94073.09  | 63291.83  |
| 64445.91  | 95107.46  | 62084.17  | 97006.42  | 85164.75  | 71430.04  | 64442.92  | 86618.36  | 94033.57  | 91896.13  |
| 60682.07  | 88091.56  | 61273.47  | 112300.4  | 86157.2   | 73976.17  | 66980.72  | 91689.29  | 95891.24  | 97620.08  |
| 59212.02  | 94968.67  | 57655.95  | 93268.89  | 76815.07  | 66443.26  | 63281.46  | 97093.33  | 92966.32  | 87838.27  |
| 52756.72  | 83482.33  | 59364.68  | 82087.06  | 81506.03  | 62387.71  | 62455.75  | 91243.4   | 96026.84  | 84331.84  |

|           |           |           |           |           |           |           |           |           |           |           |
|-----------|-----------|-----------|-----------|-----------|-----------|-----------|-----------|-----------|-----------|-----------|
| LP265.143 |
| 68514.57  | 55654.37  | 59914.97  | 91946.33  | 59775     | 64108.74  | 60779.37  | 85190.67  | 38916.18  | 72142.52  |           |
| 68572.24  | 55626.87  | 67237.88  | 85296.8   | 53710.19  | 67298.6   | 61895.95  | 82853.39  | 34990.25  | 78063.78  |           |
| 69309.76  | 60092.69  | 67369.38  | 89342.97  | 58532.44  | 72711.24  | 57456.08  | 83265.71  | 39152.47  | 85465.92  |           |
| 66959.55  | 56996.89  | 58782.97  | 86430.69  | 62125.83  | 66239.51  | 57957.1   | 83202.6   | 39883.1   | 81120.38  |           |
| 71839.37  | 56024.4   | 67143.25  | 83927.74  | 55643.48  | 65515.09  | 61440.17  | 77655.78  | 37447.46  | 77436.64  |           |

|           |           |           |           |           |           |           |           |           |           |           |
|-----------|-----------|-----------|-----------|-----------|-----------|-----------|-----------|-----------|-----------|-----------|
| LP265.143 | LP265.143 | LP265.143 | LP265.18_ | LP265.18_ | LP265.216 | LP265.216 | LP265.216 | LP265.216 | LP265.216 | LP265.216 |
| 27330.76  | 138637.6  | 139557.8  | 60578.45  | 90236.23  | 82994.75  | 64927.38  | 53164.29  | 74843.36  | 50425.62  |           |
| 31355.48  | 189411.4  | 144832.3  | 51433.17  | 90050.13  | 78690.82  | 61860.38  | 53425.87  | 74073.9   | 49182.21  |           |
| 29762.42  | 123949.9  | 125648.3  | 58857.92  | 86742.53  | 72182.55  | 98271.16  | 69007.61  | 60458.61  | 50503.74  |           |
| 29426.28  | 105484.6  | 137919.9  | 60099.21  | 89030.74  | 78055.47  | 64153.81  | 50182.82  | 79099.3   | 46156.05  |           |
| 30857.81  | 125276.9  | 193887.9  | 61653.58  | 92272.16  | 85563.12  | 58443.62  | 55801.71  | 83206.39  | 61567.59  |           |



|            |            |            |            |            |           |            |            |            |           |
|------------|------------|------------|------------|------------|-----------|------------|------------|------------|-----------|
| LP265.215\ | LP265.215\ | LP265.216\ | LP265.216\ | LP265.215\ | LP265.216 | LP265.216\ | LP265.215\ | LP265.216\ | LP265.216 |
| 42970.63   | 63262.88   | 66620.15   | 64448.42   | 56909.4    | 63774.17  | 52841.15   | 45210.71   | 44233.28   | 50165.18  |
| 38089.31   | 38387.76   | 68701.45   | 59206.39   | 72932.99   | 70250.45  | 52420.71   | 44283.78   | 48052.48   | 53612.22  |
| 36952.15   | 40175.26   | 97356.95   | 59844.45   | 59845.73   | 94028.08  | 59655.26   | 44746.58   | 48539.28   | 54658.09  |
| 35685.62   | 38060.55   | 71420.35   | 64855.69   | 56000.33   | 63594.71  | 49707.94   | 47860.15   | 51659.78   | 54789.59  |
| 50972.27   | 37036.5    | 71327.47   | 56972.74   | 58101.58   | 72022.87  | 55238.25   | 45766.7    | 48691.1    | 57345.37  |

|           |           |           |           |           |           |           |           |           |           |
|-----------|-----------|-----------|-----------|-----------|-----------|-----------|-----------|-----------|-----------|
| LP265.216 |
| 46612.22  | 58915.87  | 57457.66  | 79603.77  | 36944.33  | 56101.27  | 33934.68  | 59081.31  | 42253.3   | 52076.07  |
| 55038.92  | 64910.97  | 62154.06  | 70823.58  | 38496.36  | 49974.01  | 40549.6   | 56740.98  | 45023.31  | 60096.55  |
| 53877.26  | 58403.11  | 63367.01  | 83221.25  | 40804.79  | 58177.58  | 39770.95  | 48505.36  | 43362.72  | 63446.18  |
| 50470.86  | 57650.51  | 62750.78  | 77870.91  | 39462.69  | 56794.22  | 37102.05  | 57896.04  | 43981.24  | 56031.93  |
| 57705.77  | 51244.06  | 62561.88  | 81942.51  | 39553.4   | 53218     | 41450.87  | 62300.01  | 49846.01  | 61207.26  |

|           |           |           |           |           |           |           |           |           |           |
|-----------|-----------|-----------|-----------|-----------|-----------|-----------|-----------|-----------|-----------|
| LP265.216 |
| 64670.57  | 38310.78  | 65479.37  | 47825.32  | 43829.33  | 38368.23  | 31999.37  | 48741.23  | 38111.22  | 62360.54  |
| 68954.92  | 35066.1   | 59451.29  | 49377.39  | 50004.08  | 40771.09  | 34612.47  | 47397.08  | 37465.17  | 66264.5   |
| 66111.09  | 33015.99  | 67094.26  | 41640.39  | 40365.73  | 39263.17  | 29339.82  | 47819.45  | 35211.89  | 63058.62  |
| 70999.05  | 40510.74  | 63523.75  | 44309.2   | 44794.8   | 44207.29  | 29619.82  | 45815.59  | 38745.66  | 61622.49  |
| 76648.86  | 39941.91  | 68267.16  | 44069.54  | 54954.39  | 40324.97  | 31931.73  | 50181.34  | 39539.01  | 63634.53  |

|           |           |           |           |           |           |           |           |           |           |
|-----------|-----------|-----------|-----------|-----------|-----------|-----------|-----------|-----------|-----------|
| LP265.216 | LP265.216 | LP265.216 | LP265.216 | LP265.252 | LP265.252 | LP265.252 | LP265.252 | LP265.252 | LP265.252 |
| 42198.41  | 45880.6   | 40535.8   | 77363.68  | 35068.16  | 43400.58  | 60699.33  | 69413.75  | 76664.01  | 36411.38  |
| 44675.93  | 47639.74  | 44064.73  | 81131.67  | 40190.79  | 42630.9   | 56322.44  | 64572.91  | 88926.66  | 44610.46  |
| 42187.2   | 45084.33  | 42646.56  | 71472.91  | 35126.94  | 38597.27  | 57722.69  | 65760.1   | 77647.19  | 41168.07  |
| 44920.8   | 44569.86  | 43820.03  | 78867.1   | 44750.79  | 50297.23  | 62881.5   | 71599.03  | 74963.45  | 47309.27  |
| 45449.62  | 45358.25  | 45174.35  | 81939.17  | 37896.34  | 39006.97  | 58205.25  | 65213.59  | 78623.4   | 42464.76  |

|           |           |           |           |           |           |           |           |           |           |
|-----------|-----------|-----------|-----------|-----------|-----------|-----------|-----------|-----------|-----------|
| LP265.252 |
| 62060.64  | 52003.41  | 72009.84  | 66313.27  | 36531.28  | 45588.71  | 72746.95  | 73914.54  | 46245.91  | 70867.85  |
| 61411.43  | 50967.88  | 71684.3   | 70241.46  | 36854.67  | 47391.87  | 63916.19  | 74284.11  | 38710.29  | 77502.65  |
| 59162.19  | 53117.89  | 80196.91  | 67865.42  | 36319.02  | 45928.88  | 70106.7   | 73973.26  | 41149.23  | 76411.16  |
| 65505.07  | 53609.12  | 81286.3   | 64447.26  | 41851.78  | 50213.7   | 77012.13  | 76044.05  | 38644.61  | 71666.52  |
| 60170.38  | 47987.89  | 70779.87  | 68887.5   | 41969.76  | 45345.41  | 72202.21  | 78352.33  | 43533.56  | 76374.58  |

|           |           |           |           |           |           |           |           |           |           |
|-----------|-----------|-----------|-----------|-----------|-----------|-----------|-----------|-----------|-----------|
| LP265.252 |
| 59084.26  | 36178.6   | 117943    | 90846.49  | 63950.66  | 84901.88  | 87287.83  | 57757.3   | 57753.09  | 100561.4  |
| 61149.86  | 35007.38  | 80665.85  | 103246.1  | 113681.1  | 90541.44  | 96069.18  | 54108.36  | 62787.18  | 102223.1  |
| 63070.57  | 37176.29  | 109321.6  | 78255.51  | 84803.8   | 82414.99  | 103274.7  | 51732.74  | 63604.06  | 104116.1  |
| 59742.11  | 37949.63  | 96836.96  | 91079.94  | 112719.2  | 71618.53  | 110802.9  | 108205.8  | 61372.6   | 128524.1  |
| 61025.22  | 39184.45  | 101695.8  | 82123.99  | 86960.1   | 91247.78  | 102309.5  | 48294.48  | 67594.39  | 109127.3  |

|            |            |           |            |            |            |            |           |            |            |
|------------|------------|-----------|------------|------------|------------|------------|-----------|------------|------------|
| LP265.252! | LP265.252! | LP265.253 | LP265.252! | LP265.252! | LP265.252! | LP265.252! | LP265.253 | LP265.252! | LP265.252! |
| 55398.91   | 57840.3    | 45632.16  | 55421.65   | 70444.4    | 43264.66   | 61624.17   | 74197.91  | 68260.36   | 44752.7    |
| 51440.83   | 52485.05   | 42421.57  | 57714.13   | 76446.27   | 45850.12   | 59736.89   | 74503.84  | 71761.65   | 43498.58   |
| 54545.84   | 51675.51   | 46389.84  | 54515.35   | 68477.69   | 42141.27   | 56460.71   | 77389.34  | 60370.23   | 40672.8    |
| 60561.37   | 53626.13   | 52581.71  | 74074.18   | 74731.1    | 70699.08   | 69499.98   | 72490.87  | 107163.8   | 40810.62   |
| 54457.98   | 53171.77   | 45030.05  | 61916.57   | 74390.03   | 46383.29   | 63469.97   | 78657.64  | 72514.53   | 45255.9    |

|            |           |            |           |            |            |           |            |            |           |
|------------|-----------|------------|-----------|------------|------------|-----------|------------|------------|-----------|
| LP265.252! | LP265.253 | LP265.252! | LP265.253 | LP265.252! | LP265.252! | LP265.253 | LP265.252! | LP265.252! | LP265.253 |
| 43268.36   | 27839.92  | 47277.18   | 50020.1   | 31159.95   | 42394.04   | 37727.13  | 48747.03   | 47796.87   | 47442.73  |
| 39829.56   | 28664.81  | 46334.82   | 54067.96  | 31708.46   | 45473.46   | 35427.39  | 53249.51   | 50371.37   | 48848.25  |
| 42917.68   | 29068.22  | 46489.87   | 51405     | 26492.26   | 44490.08   | 42370.54  | 53162.88   | 49704.49   | 51462.56  |
| 42469.87   | 32880.02  | 43748.32   | 49902.89  | 30699.86   | 45669.78   | 39128.76  | 47304.22   | 51783.6    | 49893.16  |
| 45921.41   | 30212.47  | 44861.87   | 54609.22  | 29771.2    | 43843.91   | 41759.38  | 52191.41   | 49263.45   | 54799.7   |



|            |            |            |            |            |            |            |           |           |            |
|------------|------------|------------|------------|------------|------------|------------|-----------|-----------|------------|
| LP265.252' | LP265.253 | LP265.253 | LP265.252' |
| 32931.84   | 47322.48   | 59031.25   | 40969.21   | 39051.03   | 35319.25   | 42668.81   | 45088.3   | 42518.9   | 37535.1    |
| 31269.27   | 45437.25   | 54733.82   | 44922.82   | 37978.65   | 31657.96   | 41666.13   | 44144.31  | 41670.84  | 37297.73   |
| 35815.79   | 50410.63   | 54817.89   | 45839.16   | 39206.7    | 30506.25   | 40124.29   | 47004.82  | 41029.4   | 40303.98   |
| 39081.51   | 44588.77   | 57948.19   | 53434.8    | 38309.14   | 29170.17   | 48954.12   | 47905.69  | 45191.24  | 37893.07   |
| 42070.41   | 48352.92   | 61525.89   | 49806.35   | 40351.05   | 34232.1    | 41445.72   | 51444.03  | 43200.25  | 38829.63   |

|           |           |           |           |           |           |           |           |           |           |
|-----------|-----------|-----------|-----------|-----------|-----------|-----------|-----------|-----------|-----------|
| LP265.253 | LP265.252 | LP265.252 | LP265.252 | LP265.252 | LP265.252 | LP265.253 | LP265.252 | LP265.253 | LP265.252 |
| 29171.09  | 33053.11  | 38264.68  | 31493.94  | 33599.18  | 61680.15  | 50958.07  | 69129.46  | 36179.03  | 35687.87  |
| 34010.41  | 37205.57  | 33095.42  | 25122.7   | 34861.46  | 59574.21  | 49474.34  | 57315.36  | 34480.56  | 40287.27  |
| 37046.56  | 38334.73  | 34540.36  | 31565.87  | 34703.5   | 64935.07  | 56812.45  | 60460.51  | 33834.31  | 40058.66  |
| 35128.54  | 32504.99  | 35811.09  | 31495.69  | 34500.61  | 62922.3   | 51244.54  | 65621.01  | 34428.42  | 38232.28  |
| 32529.11  | 34690.63  | 36973.57  | 30226.51  | 39578.4   | 62283.81  | 53465.9   | 64107.69  | 40484.01  | 43107.84  |

|           |           |           |           |           |           |           |           |           |           |
|-----------|-----------|-----------|-----------|-----------|-----------|-----------|-----------|-----------|-----------|
| LP265.253 | LP265.252 | LP265.253 | LP265.252 | LP265.253 | LP265.252 | LP265.252 | LP265.252 | LP265.252 | LP266.178 |
| 40550.13  | 35792.35  | 48855.17  | 51382.59  | 52319.28  | 49479.74  | 61303.87  | 60395.39  | 76567.49  | 17392.88  |
| 48256.36  | 36819.64  | 54745.9   | 54149.62  | 55872.59  | 47189.67  | 56327.34  | 57612.32  | 69231.01  | 18519.52  |
| 48960.34  | 40529.16  | 48896.76  | 56185.18  | 59426.91  | 47974.69  | 57608.5   | 60058.21  | 70158.65  | 15656.73  |
| 44542.32  | 35712.78  | 48576.14  | 63996.8   | 55273.77  | 49678.68  | 61596.04  | 56519.41  | 73704.24  | 15538.83  |
| 45160.25  | 39191.01  | 52763.42  | 54861.12  | 54834.1   | 53904.24  | 59105.29  | 61383.84  | 70063.18  | 13975.43  |

|           |           |           |           |           |           |           |           |           |           |           |
|-----------|-----------|-----------|-----------|-----------|-----------|-----------|-----------|-----------|-----------|-----------|
| LP266.178 | LP267.120 |
| 24190.19  | 104888.6  | 101751    | 108698    | 106356.4  | 119150.1  | 105440.3  | 95107.59  | 82797.69  | 75968.39  |           |
| 25487.84  | 92828.16  | 80073.17  | 102853.5  | 110050.3  | 71776.17  | 89890.8   | 108877    | 94510     | 81008.16  |           |
| 22369.04  | 107708.9  | 114869.6  | 93554.81  | 102452.8  | 95719.8   | 74028.81  | 131997.6  | 93515.31  | 82022.85  |           |
| 25749.39  | 116996.8  | 153737.5  | 134334.5  | 108102.5  | 78611.62  | 96142.16  | 104830.1  | 66381.24  | 112905.6  |           |
| 25360.35  | 97993.59  | 89072.44  | 73984.08  | 114900.9  | 122626.8  | 139736.9  | 87863.63  | 92263.28  | 135249.6  |           |

|           |           |           |           |           |           |           |           |           |           |
|-----------|-----------|-----------|-----------|-----------|-----------|-----------|-----------|-----------|-----------|
| LP267.120 |
| 115032.4  | 69868.03  | 90542.87  | 101252.5  | 71763.57  | 89278.59  | 80455.55  | 118641    | 120612.9  | 87256.31  |
| 75051.22  | 80827.4   | 88234.49  | 95328.26  | 58062.03  | 87085.83  | 77624.37  | 107376.9  | 89280.02  | 126447.5  |
| 81120.62  | 126766.6  | 74725.95  | 94070.01  | 56780.58  | 83194.45  | 85952.44  | 100896.7  | 98910.46  | 114623.3  |
| 121405    | 63284.77  | 78959.09  | 148354.4  | 70100.16  | 85091.39  | 96116.08  | 76192.94  | 115962.7  | 84405.14  |
| 102138.1  | 90618.2   | 111815.8  | 112161.4  | 58897.36  | 77831.65  | 86211.18  | 133472.6  | 87522.37  | 90322.25  |

|           |           |           |           |           |           |           |           |           |           |
|-----------|-----------|-----------|-----------|-----------|-----------|-----------|-----------|-----------|-----------|
| LP267.120 |
| 83933.42  | 103185.6  | 87427.53  | 82109.81  | 86737.77  | 137679.7  | 96648.69  | 149745.5  | 121024.4  | 108197.9  |
| 79346.06  | 99717.53  | 88460.9   | 83876.13  | 107533.7  | 102726.1  | 94446.94  | 99122.21  | 108134.8  | 96294.42  |
| 80093.42  | 97712.54  | 126247    | 85994.27  | 106085.4  | 99177.94  | 92936.37  | 90562.25  | 137204.8  | 63291.93  |
| 84561.55  | 87719.22  | 88254.86  | 112681.1  | 107188.3  | 86348.45  | 135639    | 144716.1  | 104408.3  | 92155.52  |
| 89900.35  | 119918.4  | 115338.2  | 70126.33  | 100640.9  | 111318.3  | 72559.3   | 156835.1  | 114727.8  | 67435.89  |

|           |           |           |           |           |           |           |           |           |           |
|-----------|-----------|-----------|-----------|-----------|-----------|-----------|-----------|-----------|-----------|
| LP267.120 |
| 131184.4  | 90855.21  | 102883.2  | 101376    | 138072.8  | 127249.2  | 85872.71  | 93314.34  | 69556.25  | 78733.54  |
| 112680.4  | 137003.2  | 96402.74  | 100593.1  | 111199.2  | 91034.71  | 97828.42  | 112850    | 73831.05  | 101737.2  |
| 119026.9  | 93030.16  | 99409.96  | 118134.6  | 119157    | 150859    | 105118.3  | 76501.99  | 92748.06  | 95516.71  |
| 95936.25  | 124502.7  | 114205.3  | 108455.1  | 132682.4  | 93556.44  | 82762.05  | 89423.81  | 108538.9  | 98274.62  |
| 123697.2  | 97498.58  | 84768.06  | 91035.57  | 99025.06  | 91126.41  | 84744.79  | 121043.7  | 94708.93  | 85015.32  |

|           |           |           |           |           |           |           |           |           |           |
|-----------|-----------|-----------|-----------|-----------|-----------|-----------|-----------|-----------|-----------|
| LP267.120 |
| 93880     | 86235.91  | 115156.5  | 91617.61  | 173794.5  | 103606.2  | 94758.2   | 96365.11  | 98418.14  | 80319.86  |
| 157784.8  | 85493.06  | 139250.6  | 95072.87  | 99731.94  | 101481.4  | 112674.6  | 87799.53  | 94038.28  | 68602.03  |
| 149194.5  | 82177.77  | 114241.4  | 88052.86  | 132090.1  | 90544.54  | 81814.48  | 95091.45  | 92259.15  | 79709.64  |
| 73505.04  | 109136.2  | 93999.65  | 114779.8  | 115253    | 100161.2  | 81038.43  | 97500.73  | 113046    | 120892.9  |
| 87659.43  | 83302.48  | 103520.8  | 81977.72  | 116799.5  | 84233.86  | 86352.78  | 112869.3  | 98252.15  | 92778.02  |



|            |            |            |            |            |            |            |            |            |            |
|------------|------------|------------|------------|------------|------------|------------|------------|------------|------------|
| LP267.120! |
| 72326.35   | 96642.47   | 75279.99   | 111296.2   | 106713.4   | 87541.69   | 112052.1   | 100759.5   | 92784.85   | 82399.78   |
| 69247.25   | 95320.15   | 81288.16   | 114616.8   | 111066.9   | 83938.21   | 110249.6   | 94703.92   | 84354.58   | 87720.86   |
| 79648.83   | 100368.2   | 81304.01   | 102033.2   | 109963.7   | 88403.09   | 113115.2   | 95906.52   | 86493.35   | 90665.16   |
| 61506.82   | 113399     | 82210.05   | 132054.6   | 104401.5   | 86526.64   | 108079.1   | 96200.45   | 77823.54   | 111088.3   |
| 71389.74   | 106451.1   | 77666.25   | 102718.7   | 109649.9   | 77723.94   | 106013.7   | 102458.2   | 85372.08   | 87279.95   |

|            |            |            |            |            |            |            |            |            |            |
|------------|------------|------------|------------|------------|------------|------------|------------|------------|------------|
| LP267.120! |
| 94448.92   | 91056.6    | 72168.73   | 78173.05   | 95913.48   | 89946.68   | 110323.2   | 71234.56   | 101876.6   | 91090.79   |
| 89600.9    | 129392.8   | 84951.69   | 82685.1    | 97873.01   | 92611.61   | 87479.31   | 72739.68   | 104103.2   | 86539.44   |
| 99142.79   | 88950.33   | 116609.8   | 86846.03   | 99927.78   | 94490.17   | 90860.66   | 66269.35   | 102932.6   | 112313.7   |
| 94455.65   | 78076.84   | 71289.14   | 76822.32   | 70949.05   | 99991.17   | 91293.57   | 61152.45   | 117027.5   | 151762     |
| 102271.2   | 86595.58   | 124275.9   | 73187.08   | 99258.23   | 104206.1   | 87364.48   | 71801.13   | 112345.7   | 74895.17   |

|            |            |            |            |            |            |            |            |            |            |
|------------|------------|------------|------------|------------|------------|------------|------------|------------|------------|
| LP267.120! |
| 91948.41   | 67213.23   | 58469.47   | 91164.79   | 49640.51   | 71069.15   | 64619.96   | 75721.79   | 80099.79   | 93247.89   |
| 99505.43   | 69899.1    | 53093.69   | 86535.98   | 55160.97   | 71849.66   | 63179.89   | 76544.42   | 80211.25   | 90429.92   |
| 104381.5   | 70245.25   | 60357.2    | 87761.8    | 48695.02   | 61670.95   | 61501.26   | 75456.37   | 79428.65   | 97074.77   |
| 95721.44   | 78114.02   | 49816.5    | 82794.79   | 87159.5    | 97482.38   | 104782.7   | 60700.27   | 77945.59   | 96274.73   |
| 92743.07   | 63766.66   | 44722.75   | 82600.26   | 46186.08   | 68296.78   | 59869.33   | 78264.76   | 74174.68   | 110867.8   |

|           |           |           |           |           |           |           |           |           |           |
|-----------|-----------|-----------|-----------|-----------|-----------|-----------|-----------|-----------|-----------|
| LP267.120 | LP267.120 | LP267.120 | LP267.158 | LP267.159 | LP267.159 | LP267.159 | LP267.158 | LP267.159 | LP267.158 |
| 68168.02  | 55075.26  | 85244.04  | 75771.92  | 84571.62  | 87184.79  | 65862.71  | 47672.48  | 109579.9  | 99138.17  |
| 70641.66  | 50728.71  | 86211.99  | 62684.27  | 86371.73  | 77130.88  | 66849.14  | 54420.28  | 114148.3  | 88179.25  |
| 68391.18  | 52229.01  | 83209.54  | 66327.22  | 85056.24  | 88208.24  | 62215.45  | 51922.22  | 118257.9  | 94096.41  |
| 67430.87  | 67008.28  | 85659.66  | 73056.34  | 89708.24  | 78551.26  | 55931.6   | 45942.53  | 118838.9  | 91671.1   |
| 58572.61  | 48615.67  | 81963.96  | 74166.15  | 87807.26  | 99018.76  | 63936.8   | 50721.85  | 108444.1  | 97481.98  |

|           |           |           |           |           |           |           |           |           |           |
|-----------|-----------|-----------|-----------|-----------|-----------|-----------|-----------|-----------|-----------|
| LP267.159 | LP267.159 | LP267.172 | LP267.174 | LP267.195 | LP267.195 | LP267.195 | LP267.195 | LP267.195 | LP267.195 |
| 87635.04  | 102064.2  | 886520.3  | 46461.27  | 82552.41  | 89248.8   | 56260.05  | 61078.95  | 75266.95  | 45647.83  |
| 87412.26  | 100000.2  | 277669.5  | 49160.43  | 82974.4   | 90607.81  | 55307.47  | 70820.55  | 75852.14  | 51405.62  |
| 89385.16  | 94820.41  | 408445.4  | 52819.97  | 80308.27  | 90061.06  | 58964.35  | 65976.01  | 79424.91  | 47209.35  |
| 85232.24  | 96334.52  | 641222    | 50384.78  | 83055.9   | 88120.35  | 62286.69  | 71322.72  | 70226.12  | 47892.21  |
| 87192.16  | 106159.5  | 513909.6  | 45103.49  | 81294.88  | 94609.77  | 53655.87  | 44015.83  | 78159.36  | 47214.57  |

|           |           |           |           |           |           |           |           |           |           |           |
|-----------|-----------|-----------|-----------|-----------|-----------|-----------|-----------|-----------|-----------|-----------|
| LP267.195 |
| 56336.85  | 95671.2   | 82159.83  | 72894.39  | 82071.14  | 96759.62  | 96023.03  | 87307.48  | 93926.23  | 116423.1  |           |
| 52078.61  | 95419.36  | 71847.44  | 69172.63  | 73059.56  | 92756.52  | 91768.36  | 84972.53  | 90256.73  | 95463.89  |           |
| 59032.65  | 94804.37  | 78132.39  | 70791.73  | 83539.47  | 91363.86  | 87319.99  | 80045.06  | 89984.19  | 103965    |           |
| 60363.56  | 77126.23  | 72438.43  | 70562.54  | 84021.3   | 94314.12  | 87895.42  | 80813.82  | 87652.83  | 101921.6  |           |
| 58369.94  | 78023.98  | 74789.01  | 72158.86  | 78693.39  | 91374.23  | 101484.7  | 87284.33  | 81176.41  | 106201.4  |           |

|           |           |           |           |           |           |           |           |           |           |           |
|-----------|-----------|-----------|-----------|-----------|-----------|-----------|-----------|-----------|-----------|-----------|
| LP267.195 |
| 123251.6  | 73536.45  | 59353.06  | 129741.4  | 68027.52  | 117626.2  | 69792.96  | 63012.65  | 61920     | 65099.31  |           |
| 131066    | 70200.8   | 58915.52  | 127631    | 79188.74  | 113297.5  | 78605.69  | 59745.22  | 66583.96  | 61077.56  |           |
| 122419.3  | 70386.56  | 54804.52  | 130727.9  | 78378.57  | 117944    | 87757.08  | 63243.07  | 62564.13  | 67675.07  |           |
| 121616.9  | 73193.09  | 49631.87  | 124785.8  | 75584.76  | 110123.5  | 79332.13  | 63243.26  | 64683.67  | 60607.1   |           |
| 123725.6  | 72762.09  | 60395.28  | 83003.13  | 73907.67  | 109069.9  | 80227.99  | 53328.39  | 65643.88  | 65322.65  |           |

|           |           |           |           |           |           |           |           |           |           |
|-----------|-----------|-----------|-----------|-----------|-----------|-----------|-----------|-----------|-----------|
| LP267.195 | LP267.195 | LP267.231 | LP267.232 | LP267.232 | LP267.231 | LP267.232 | LP267.232 | LP267.232 | LP267.232 |
| 47102.17  | 54415.5   | 73207.39  | 73639.32  | 106476    | 81505.84  | 78196.56  | 59008.1   | 72297.68  | 85974     |
| 51165.98  | 47887.87  | 58737.5   | 64237.66  | 97470.06  | 74890.43  | 78658.04  | 55042.87  | 66391.74  | 84704.64  |
| 48987.47  | 49930.75  | 74885.23  | 72613.13  | 107243.6  | 65666.88  | 87211.61  | 56793.31  | 70134.99  | 88702.03  |
| 54800.1   | 51873.19  | 64408.47  | 66710.15  | 109550.9  | 76873.02  | 59629.46  | 59960.16  | 63358.09  | 82901.72  |
| 46676.18  | 48906.64  | 61342.6   | 64986.22  | 98341.11  | 54661.01  | 82111.96  | 59579.78  | 51275.04  | 85706.53  |



|           |           |           |           |           |           |           |           |           |           |
|-----------|-----------|-----------|-----------|-----------|-----------|-----------|-----------|-----------|-----------|
| LP267.231 | LP267.232 | LP267.231 | LP267.232 | LP267.232 | LP267.232 | LP267.232 | LP267.231 | LP267.232 | LP267.231 |
| 85913.29  | 80215.39  | 76765.9   | 76508.94  | 83025.12  | 81350.64  | 75950.2   | 51290.52  | 72212.73  | 67753.18  |
| 99901.86  | 83468.12  | 70967.2   | 77482.86  | 88338.97  | 82032.26  | 83201.19  | 57812.23  | 72853.58  | 66198.23  |
| 52301.95  | 79571.85  | 74060.8   | 74223.32  | 87629.55  | 76804.12  | 85627.25  | 48578.92  | 80349.34  | 64844.28  |
| 97671.94  | 79837.06  | 44680.54  | 87856.49  | 86729.03  | 78730.5   | 78614.87  | 59363.18  | 65449.73  | 65111.18  |
| 70263.76  | 78179.16  | 75707.32  | 78592.18  | 91006.44  | 77988.36  | 78783.73  | 56859.37  | 75097.52  | 59612.27  |

|           |           |           |           |           |           |           |           |           |           |
|-----------|-----------|-----------|-----------|-----------|-----------|-----------|-----------|-----------|-----------|
| LP267.232 | LP267.232 | LP267.231 | LP267.232 | LP267.232 | LP267.232 | LP267.231 | LP267.232 | LP267.231 | LP267.232 |
| 70632.42  | 107272.6  | 68756.37  | 66031.57  | 68335.7   | 45017.09  | 45234.16  | 108877.8  | 82016.93  | 68266.79  |
| 73469.65  | 106162.6  | 63081.49  | 70775.46  | 68085.78  | 44518.16  | 55657.06  | 108255.4  | 75917.2   | 65361.97  |
| 61334.82  | 107645.1  | 71346.1   | 65781.14  | 69766.29  | 47355.5   | 38855.02  | 112116.1  | 81870.68  | 67116.02  |
| 67449.71  | 99166.11  | 61838.67  | 70650.52  | 68330.58  | 47922.12  | 52517.09  | 105019.8  | 81147.53  | 69675.79  |
| 75095.22  | 105603.4  | 52560.18  | 71219.43  | 67161.41  | 52441.26  | 48041.05  | 111970.1  | 78237.13  | 67191.16  |

|           |           |           |           |           |           |           |           |           |           |
|-----------|-----------|-----------|-----------|-----------|-----------|-----------|-----------|-----------|-----------|
| LP267.232 | LP267.232 | LP267.231 | LP267.231 | LP267.231 | LP267.233 | LP267.268 | LP268.154 | LP268.154 | LP268.154 |
| 48577.86  | 77108.35  | 78978.03  | 73904.59  | 80404.18  | 71916.9   | 98401.02  | 22198.98  | 26563.93  | 19678.87  |
| 53153     | 73595.24  | 78147.37  | 75042.12  | 82080.44  | 72535.08  | 110172.9  | 21367.54  | 27434.87  | 19269.02  |
| 51189.42  | 75140.93  | 82951.31  | 77971.47  | 81297.03  | 72085.09  | 132292.3  | 21567.52  | 26599.86  | 18788.96  |
| 51000.9   | 74336.08  | 78610.2   | 71944.54  | 78900.2   | 66790.62  | 134254.5  | 21575.42  | 25791.61  | 20809.92  |
| 51706.9   | 78470.16  | 85526.17  | 69860.36  | 61510.97  | 75443.9   | 139981.5  | 23277.24  | 28126.35  | 23203.18  |

|           |           |           |           |           |           |           |           |           |           |
|-----------|-----------|-----------|-----------|-----------|-----------|-----------|-----------|-----------|-----------|
| LP268.190 | LP268.191 | LP268.191 | LP268.191 | LP268.190 | LP268.191 | LP268.191 | LP268.191 | LP268.263 | LP269.136 |
| 23958.79  | 26226.68  | 21909.51  | 19070.39  | 23886.78  | 25041.14  | 19667.27  | 23944.96  | 15433.12  | 162819.4  |
| 19920.36  | 25082.99  | 23785.07  | 20935.28  | 24687.49  | 25775.86  | 20319.3   | 26756.03  | 12385.78  | 119382.2  |
| 20812.79  | 28376.92  | 22157.28  | 21464.24  | 21082.7   | 26934.33  | 20457.27  | 23015.44  | 8971.303  | 106320    |
| 23535.95  | 27360.17  | 20446.41  | 23644.97  | 25418.09  | 28581.19  | 21246.52  | 26869.15  | 7875.156  | 154504.7  |
| 25464.82  | 29417.5   | 24275     | 22564.89  | 26122.66  | 29552.71  | 22028.53  | 26941.42  | 10094.04  | 119410.6  |

|           |           |           |           |           |           |           |           |           |           |
|-----------|-----------|-----------|-----------|-----------|-----------|-----------|-----------|-----------|-----------|
| LP269.136 | LP269.135 | LP269.136 |
| 83802.63  | 149872.8  | 133237.2  | 109634.8  | 112420.1  | 106877.4  | 106112    | 107792.3  | 141937.9  | 106414.6  |
| 123018.7  | 97724.11  | 110518.4  | 152980.3  | 122889.4  | 105550.9  | 197305.9  | 110118.1  | 120979    | 111446.7  |
| 116266.7  | 128715.8  | 143048    | 94213.9   | 117273.7  | 99212.17  | 110149.9  | 148689.9  | 111208.6  | 136299.4  |
| 92660.57  | 133308.5  | 101309.6  | 92181.66  | 138200.1  | 143513.9  | 170132.3  | 123719.8  | 102098.3  | 102919.9  |
| 98364.28  | 87584     | 138560.2  | 164662.7  | 115676.4  | 88196.57  | 83094.85  | 113581.5  | 125463.3  | 101209.1  |

|           |           |           |           |           |           |           |           |           |           |
|-----------|-----------|-----------|-----------|-----------|-----------|-----------|-----------|-----------|-----------|
| LP269.136 |
| 136578.7  | 161224.9  | 100723.4  | 148806.7  | 95483.95  | 89164.47  | 150425.5  | 81641.52  | 92846.29  | 102845.8  |
| 130518.1  | 96709.41  | 108644.8  | 114936.7  | 157721.9  | 69238.67  | 141576.6  | 113104.8  | 99623.97  | 132552.5  |
| 94504.42  | 108074.5  | 108497.1  | 150998.2  | 124012    | 91404.19  | 141553.9  | 94308.41  | 104283.4  | 91687.11  |
| 118015.3  | 101055.5  | 76538.99  | 112791.4  | 91934.69  | 93288.31  | 165526.3  | 95429.11  | 98453.73  | 87469.61  |
| 115602    | 97768.2   | 98980.46  | 77443.38  | 91905.91  | 93479.13  | 122451.7  | 124614.7  | 102704.4  | 94686.24  |

|           |           |           |           |           |           |           |           |           |           |
|-----------|-----------|-----------|-----------|-----------|-----------|-----------|-----------|-----------|-----------|
| LP269.136 |
| 146323    | 103716.1  | 97166.47  | 96406.7   | 100914.4  | 134474.1  | 175239.5  | 102913.4  | 97992.13  | 94961.1   |
| 136944.1  | 105416.1  | 119505.2  | 124251.8  | 83859.48  | 122030.2  | 89283.26  | 106497.4  | 90958.86  | 118385.9  |
| 140140.8  | 103299.6  | 101969.6  | 115364.3  | 106746.3  | 134327.4  | 90101.19  | 108573.6  | 82393.44  | 92227.97  |
| 139711.7  | 105747.7  | 138753    | 125561.2  | 104988.5  | 140219.5  | 95832.6   | 112498.5  | 89089.96  | 86438.25  |
| 139440.7  | 106416.5  | 96927.35  | 117227.1  | 95998.12  | 125936.9  | 89719.7   | 95707.14  | 85186.5   | 137477.8  |

|           |           |           |           |           |           |           |           |           |           |
|-----------|-----------|-----------|-----------|-----------|-----------|-----------|-----------|-----------|-----------|
| LP269.136 |
| 79047.09  | 122333.1  | 101887.7  | 82881.48  | 133913.3  | 128063.7  | 150839    | 109204.2  | 105302.6  | 109418.9  |
| 78411.16  | 110387.7  | 96621.06  | 83064.52  | 79564.12  | 129716.3  | 159745.4  | 141391.7  | 104301    | 109093.8  |
| 150993.5  | 183392.2  | 91327.8   | 130839.2  | 128961    | 131525.3  | 142932.2  | 104894.1  | 131363.7  | 102861.4  |
| 66651.6   | 111160    | 102821.9  | 100299.2  | 132338.2  | 119955.8  | 149411.3  | 111392.5  | 100092.9  | 97101.71  |
| 70566.74  | 105682.6  | 104093.9  | 88109.45  | 133741.1  | 131294.3  | 147218.4  | 112511.3  | 112472    | 114925.3  |



|           |           |           |           |           |           |           |           |           |           |
|-----------|-----------|-----------|-----------|-----------|-----------|-----------|-----------|-----------|-----------|
| LP269.136 |
| 136312.7  | 127300.5  | 83827.56  | 116906.2  | 94620.93  | 99253.05  | 100449    | 102876.7  | 114238.3  | 105002.2  |
| 125448.2  | 128252.8  | 86588.1   | 115191.7  | 101911.5  | 92349.33  | 100748.9  | 131194.7  | 101895.8  | 106823.6  |
| 134493.2  | 125941.1  | 99328.86  | 119936.8  | 102493.8  | 102061    | 109801.8  | 114496    | 110025.2  | 111220.3  |
| 133268.1  | 113701.5  | 83153.94  | 127844.3  | 93862.7   | 97848.45  | 93858.32  | 121802    | 108845    | 112739.2  |
| 123123.4  | 121597.4  | 85503.42  | 120018.7  | 108611.5  | 98689.98  | 91495.83  | 101994.9  | 113928.2  | 104043.2  |

|           |           |           |           |           |           |           |           |           |           |
|-----------|-----------|-----------|-----------|-----------|-----------|-----------|-----------|-----------|-----------|
| LP269.136 |
| 105666.7  | 110093.8  | 98878.27  | 60378.84  | 99502     | 66457.04  | 81954.12  | 89921.4   | 78766.79  | 80131.96  |
| 114170.5  | 104128.2  | 102532.9  | 59111.07  | 90205.79  | 71565.1   | 80647.13  | 86335.59  | 77996.02  | 82581.29  |
| 113840.2  | 120859.5  | 83517.64  | 66364.78  | 103221    | 70558.63  | 87990.9   | 94666.5   | 84176.84  | 83053.54  |
| 116330.7  | 114636.2  | 88802.68  | 63850.46  | 105017.5  | 70658.88  | 81713.84  | 96907.61  | 89495.4   | 86809.26  |
| 112021    | 114499.6  | 86481.29  | 62354.23  | 91026.09  | 63950.06  | 75343.49  | 88264.96  | 80500.47  | 74623.44  |

|           |           |           |           |           |           |           |           |           |           |
|-----------|-----------|-----------|-----------|-----------|-----------|-----------|-----------|-----------|-----------|
| LP269.136 | LP269.136 | LP269.136 | LP269.174 | LP269.175 | LP269.175 | LP269.175 | LP269.174 | LP269.174 | LP269.175 |
| 67222.14  | 90322.71  | 59773.51  | 103747    | 177487    | 169270    | 145767.3  | 105659    | 119533.5  | 131734.4  |
| 68094.95  | 88167.98  | 65148.28  | 95277.48  | 170992.6  | 162240.7  | 152880.4  | 102325.4  | 129189.3  | 126189.5  |
| 62963.39  | 86882.8   | 58938.74  | 113199.9  | 180138.6  | 161096.5  | 143969.1  | 88153.85  | 127007.7  | 122265    |
| 68498.71  | 93562.6   | 62035.26  | 77399.55  | 109627.7  | 120051.6  | 150710    | 56316.17  | 129646.7  | 83061.64  |
| 62576.36  | 77354.18  | 59397.33  | 110290.3  | 192203.9  | 181941.3  | 173491.9  | 99516.29  | 118977.8  | 127043.5  |

|           |           |           |           |           |           |           |           |           |           |
|-----------|-----------|-----------|-----------|-----------|-----------|-----------|-----------|-----------|-----------|
| LP269.175 | LP269.175 | LP269.174 | LP269.174 | LP269.174 | LP269.174 | LP269.175 | LP269.175 | LP269.174 | LP269.174 |
| 128269    | 151592.6  | 111458    | 92079.05  | 108192.1  | 113714.7  | 194548.6  | 148793.5  | 142068.3  | 81116.19  |
| 137042.6  | 131609.7  | 109113.3  | 72892.58  | 104276.5  | 115725.6  | 198877.8  | 130976.3  | 145451.5  | 75978.6   |
| 131913.3  | 130705.3  | 117563.9  | 86135.99  | 105469.7  | 118682.5  | 196396.4  | 133305.4  | 145892.1  | 71611.94  |
| 127312    | 139625.5  | 118681.1  | 89634.56  | 103562.4  | 120147.8  | 203493.1  | 130109.3  | 136641.1  | 79214.48  |
| 147997.2  | 134499.4  | 128587.8  | 91731.12  | 120714.7  | 112606.3  | 223437.4  | 128926.5  | 145587.8  | 80579.48  |

|           |           |           |           |           |           |           |           |           |           |
|-----------|-----------|-----------|-----------|-----------|-----------|-----------|-----------|-----------|-----------|
| LP269.175 | LP269.175 | LP269.174 | LP269.175 | LP269.174 | LP269.175 | LP269.174 | LP269.174 | LP269.175 | LP269.174 |
| 164124.1  | 176826.5  | 125896.2  | 91642.45  | 136351.6  | 126076.7  | 88396.69  | 109217.3  | 85812.7   | 156156.6  |
| 164184.9  | 173789.2  | 121154.8  | 97296.44  | 138006.4  | 127076.9  | 88543.2   | 108569.5  | 83254.94  | 148671.4  |
| 165115.6  | 164233.8  | 132890.8  | 99410.64  | 138150.7  | 128317.6  | 90743.68  | 112041.2  | 75509.52  | 156590.1  |
| 172559.8  | 170227.4  | 131053.2  | 105573.2  | 138638.1  | 128891.7  | 95443.81  | 109436.4  | 89845.16  | 141970.7  |
| 182604.6  | 169071    | 144213.1  | 102087.8  | 148345.9  | 129687.2  | 104857.9  | 122867.9  | 87479.09  | 154633.7  |

|           |           |           |           |           |           |           |           |           |           |
|-----------|-----------|-----------|-----------|-----------|-----------|-----------|-----------|-----------|-----------|
| LP269.174 | LP269.174 | LP269.175 | LP269.175 | LP269.174 | LP269.175 | LP269.211 | LP269.211 | LP269.211 | LP269.211 |
| 98069.27  | 126345.1  | 68795.45  | 132878.2  | 120831.7  | 87176.8   | 98302.29  | 87146.8   | 119571.1  | 81790.14  |
| 92704.72  | 129947.6  | 71250.65  | 124581.5  | 130878.3  | 81515.98  | 101135.6  | 200304.7  | 164822.6  | 148078.6  |
| 94253.91  | 123823.5  | 68553.41  | 136994.9  | 127404.1  | 82416.41  | 98665.2   | 192374.6  | 164697.9  | 160758.9  |
| 98595.55  | 127321    | 74492.63  | 126889.9  | 124446.2  | 88718.65  | 180334.4  | 184698.8  | 176379.5  | 160070.3  |
| 103858.9  | 126528.6  | 68643.8   | 128387.7  | 130939    | 89900.91  | 185876.6  | 200253.5  | 194488.2  | 174037.8  |

|           |           |           |           |           |           |           |           |           |           |
|-----------|-----------|-----------|-----------|-----------|-----------|-----------|-----------|-----------|-----------|
| LP269.211 | LP269.210 |
| 68620.72  | 50764.53  | 55225.14  | 116394.5  | 190047.6  | 121822.8  | 127689.5  | 93016.27  | 91703.06  | 70466.9   |
| 155857.5  | 122735    | 125924.7  | 120574.7  | 185873.1  | 116950.4  | 136931.5  | 89756.09  | 91215.4   | 74200.77  |
| 150728    | 115030.9  | 113755.7  | 124256.5  | 185689.8  | 119351.7  | 132091.2  | 94728.85  | 94116.19  | 77011.02  |
| 153023.6  | 79990.38  | 132621.4  | 137542.5  | 200965.5  | 123915.6  | 145401.3  | 101273.7  | 92483.75  | 81882.41  |
| 160067.8  | 125149.4  | 137499.9  | 132543.1  | 198475.7  | 116052.4  | 134987.3  | 90628.25  | 97268.65  | 77227.78  |

|           |           |           |           |           |           |           |           |           |           |
|-----------|-----------|-----------|-----------|-----------|-----------|-----------|-----------|-----------|-----------|
| LP269.211 | LP269.247 | LP269.247 | LP269.247 |
| 121317.8  | 130344.5  | 145199.1  | 111887.1  | 48104.97  | 123293    | 76221.09  | 135237.3  | 179713.5  | 135386.6  |
| 121940.9  | 121468.1  | 133565.9  | 108138.4  | 88012.17  | 67064.34  | 74734.24  | 119713.2  | 191886.7  | 129724.2  |
| 120120.8  | 123558.9  | 134879.5  | 108735.1  | 82401.28  | 120799.5  | 83042.61  | 128753.1  | 190236.9  | 131177.5  |
| 124708.1  | 73641.36  | 80285.55  | 118712.1  | 74974.15  | 129265.5  | 81852.52  | 139665.3  | 168915.7  | 135398.8  |
| 127484.5  | 140569.5  | 152884.3  | 130130.2  | 94831.51  | 132458.2  | 77482.88  | 152129.2  | 185063.2  | 149166.5  |



|           |           |           |           |           |           |           |           |           |           |
|-----------|-----------|-----------|-----------|-----------|-----------|-----------|-----------|-----------|-----------|
| LP269.247 |
| 110972    | 112431    | 124719.5  | 179489.1  | 119257.6  | 131385.8  | 161364.5  | 166773.8  | 140873.6  | 109078.4  |
| 103392.3  | 109384.5  | 120661.5  | 191620.1  | 121051.6  | 144284.6  | 160045.4  | 168298    | 144285.6  | 105024.4  |
| 100136    | 112714.9  | 119552.2  | 184057.3  | 122770.8  | 135261.4  | 160830.1  | 156520.8  | 146116.5  | 99744.66  |
| 110439.6  | 102490.5  | 122708    | 182586.5  | 122132.7  | 149091.2  | 154245.1  | 149662.5  | 141602.6  | 110896.1  |
| 106215.9  | 114992.8  | 124789.4  | 199486.6  | 132119    | 150556.5  | 168142.2  | 161455    | 144056.7  | 118651.9  |

|           |           |           |           |           |           |           |           |           |           |
|-----------|-----------|-----------|-----------|-----------|-----------|-----------|-----------|-----------|-----------|
| LP269.957 | LP270.155 | LP270.170 | LP270.170 | LP270.170 | LP270.170 | LP270.170 | LP270.243 | LP270.243 | LP270.243 |
| 18269.48  | 16266.97  | 40093.09  | 35738.79  | 28214.32  | 25953.12  | 17240.01  | 20998.1   | 15902.44  | 9582.76   |
| 17690.52  | 17387.32  | 38087.74  | 43021.2   | 29203.42  | 25022.2   | 18654.14  | 31635.56  | 16361.4   | 7999.678  |
| 18091.65  | 16156.08  | 38022.42  | 38938.91  | 25449.88  | 22706.54  | 17675.33  | 30729.27  | 17348.92  | 8624.791  |
| 17775.26  | 14148.61  | 41001.11  | 44554.17  | 28408.05  | 23077.14  | 15095.42  | 30708.88  | 15743.1   | 7045.924  |
| 13176.97  | 13880.18  | 39940.71  | 39548.53  | 24325     | 19582.08  | 15099.57  | 30070.75  | 13788.66  | 8961.885  |

|           |           |           |           |           |           |           |           |           |           |
|-----------|-----------|-----------|-----------|-----------|-----------|-----------|-----------|-----------|-----------|
| LP270.251 | LP270.251 | LP270.251 | LP270.251 | LP270.279 | LP270.315 | LP271.115 | LP271.115 | LP271.115 | LP271.115 |
| 27079.82  | 33560.18  | 27296.74  | 35676.73  | 43780.89  | 165702.9  | 383518.3  | 167434.4  | 207721.6  | 200411    |
| 29463.1   | 27207.47  | 28868.81  | 24309.34  | 43883.42  | 178458.5  | 238115.2  | 142522.7  | 259414.6  | 354732.2  |
| 28591.32  | 29430.34  | 19962.52  | 29126.4   | 51071.97  | 242723.2  | 271368.3  | 171745.5  | 196428.6  | 253169.4  |
| 27966.57  | 30674.18  | 22498.03  | 30079.81  | 53725.33  | 289629.7  | 315490.7  | 215347    | 270712.9  | 242221.9  |
| 34097.6   | 34732.81  | 30241.08  | 32507.44  | 54945.66  | 309588    | 271409.6  | 268754.5  | 229149.4  | 272175.5  |

|           |           |           |           |           |           |           |           |           |           |           |
|-----------|-----------|-----------|-----------|-----------|-----------|-----------|-----------|-----------|-----------|-----------|
| LP271.115 |
| 331530.5  | 236648.1  | 207198.6  | 136453.5  | 299067.1  | 267605.2  | 231542.4  | 339263.3  | 256022.4  | 258067    |           |
| 254439    | 223230.7  | 176244.1  | 120180.8  | 295432.8  | 378373.8  | 314405.3  | 238555.1  | 256025    | 199181.7  |           |
| 220280    | 173823.2  | 225747.6  | 112623.8  | 235589.2  | 303115.2  | 205989.4  | 234860.9  | 202595.5  | 229666    |           |
| 285762.9  | 218405    | 329630.5  | 150313.5  | 243439    | 211146    | 276248.7  | 405498    | 283216.4  | 191970    |           |
| 237980.6  | 277868.5  | 333234.8  | 120832.5  | 315110.9  | 267046.5  | 277776    | 270630.2  | 298802.6  | 239414.5  |           |

|           |           |           |           |           |           |           |           |           |           |
|-----------|-----------|-----------|-----------|-----------|-----------|-----------|-----------|-----------|-----------|
| LP271.115 |
| 399053.1  | 207234.2  | 192085.6  | 277831.3  | 208681.8  | 192260.6  | 359933.4  | 379047.6  | 250184    | 261118.8  |
| 252313.6  | 341483.6  | 196123.7  | 302380.5  | 290936    | 257850.2  | 248325.9  | 198782.6  | 274673.9  | 230057.9  |
| 310623.4  | 325355.8  | 292907.3  | 232769.1  | 255539.7  | 185080.5  | 268226.6  | 220380.6  | 316427.9  | 310249.6  |
| 263027.5  | 227271.8  | 197909.8  | 268229.8  | 230633.3  | 264197.2  | 240235.4  | 234725.2  | 254362.4  | 188384.6  |
| 219729.4  | 323607.7  | 205165.5  | 265231.1  | 225784.2  | 176441.1  | 377876.5  | 223221    | 373237.2  | 222224.3  |

|           |           |           |           |           |           |           |           |           |           |
|-----------|-----------|-----------|-----------|-----------|-----------|-----------|-----------|-----------|-----------|
| LP271.115 |
| 337500.4  | 295297.1  | 333769.1  | 220041.6  | 302656.4  | 284343.5  | 217229.3  | 207455.1  | 241758.6  | 310348.7  |
| 275943.7  | 293684.7  | 401740.8  | 319304.2  | 236296    | 228789.4  | 239733.8  | 218948    | 232106.5  | 234938.3  |
| 316955.5  | 317662.6  | 308070.1  | 200480.8  | 250842    | 231608.2  | 252312.7  | 222021.3  | 228870.4  | 317111.7  |
| 264062.3  | 311617.5  | 263581.7  | 249721.9  | 275363.3  | 243377    | 238624.7  | 192774.9  | 240844.3  | 260742.6  |
| 284951.7  | 315562.8  | 327705.8  | 202754.9  | 247227.3  | 199079.4  | 223301.9  | 241744.2  | 232377.5  | 198958.9  |

|           |           |           |           |           |           |           |           |           |           |
|-----------|-----------|-----------|-----------|-----------|-----------|-----------|-----------|-----------|-----------|
| LP271.115 |
| 262080    | 261821.5  | 159878.7  | 217117    | 335935.3  | 183146    | 157319.5  | 198395.3  | 286237.2  | 243438.4  |
| 295723.2  | 421111.5  | 207293.5  | 214483.7  | 286147.3  | 265193.5  | 152612.1  | 219277.7  | 294875.8  | 218964.8  |
| 292571.6  | 296036.3  | 196794.3  | 280258.1  | 296398.9  | 189901.2  | 179481.5  | 237514.7  | 302033.7  | 223027.2  |
| 240766.6  | 254694.3  | 298421    | 323251.4  | 246759.2  | 222104.8  | 132564    | 236850.3  | 186786.6  | 251313.2  |
| 272348.9  | 288552.5  | 232509.4  | 208653.9  | 305617.3  | 186925.6  | 226722.6  | 210728.4  | 234050.3  | 219237.1  |

|           |           |           |           |           |           |           |           |           |           |
|-----------|-----------|-----------|-----------|-----------|-----------|-----------|-----------|-----------|-----------|
| LP271.115 |
| 194331.6  | 184496.9  | 199035.7  | 292478.8  | 187179.7  | 277770.8  | 303002.6  | 221588.6  | 210929.8  | 242015.6  |
| 212143.9  | 142017.3  | 175743.5  | 274930.3  | 176074.4  | 272042.9  | 208589.4  | 213346    | 209950.5  | 210879    |
| 222050.5  | 148274.9  | 225318.6  | 269367.7  | 228825.2  | 275056.6  | 197760    | 175216.8  | 214749.9  | 229885.7  |
| 173015.7  | 188967.9  | 164722.9  | 263731.3  | 240576.8  | 290365.6  | 242569.7  | 177406.1  | 292009.3  | 226862    |
| 263639.1  | 154854    | 200742.6  | 290737.4  | 183279.3  | 254155.3  | 281147.1  | 204296.9  | 207904.4  | 233372    |



|           |           |           |           |           |           |           |           |           |           |
|-----------|-----------|-----------|-----------|-----------|-----------|-----------|-----------|-----------|-----------|
| LP271.115 |
| 201055.3  | 226679    | 234342.5  | 214097.4  | 192928.6  | 209816.7  | 227945.3  | 264134    | 203395.8  | 189334.3  |
| 197191.4  | 207539    | 233252.3  | 227064.5  | 183559.3  | 210265.6  | 234368.7  | 209132.8  | 198263.1  | 196286.7  |
| 192576.7  | 182014.3  | 265278.7  | 228459.8  | 186373.4  | 223877.7  | 238746.9  | 196797.7  | 190043.1  | 187517.6  |
| 209835.4  | 230320.7  | 162386.9  | 327841    | 192377.1  | 230197.4  | 260330.5  | 203345.3  | 276903.2  | 192280.8  |
| 227879.8  | 229567.1  | 219446.1  | 259834.3  | 179611.4  | 240384.5  | 261159.5  | 176364.6  | 184497.5  | 212512.7  |

|           |           |           |           |           |           |           |           |           |           |
|-----------|-----------|-----------|-----------|-----------|-----------|-----------|-----------|-----------|-----------|
| LP271.115 |
| 284709.3  | 260276.6  | 169616.9  | 166044.3  | 141925.7  | 150329.8  | 86780.24  | 127004.3  | 125309.5  | 129556    |
| 217633.2  | 226765.3  | 164043.1  | 130974.7  | 137383.4  | 160768.1  | 112724.6  | 127884.2  | 204497.7  | 121129.2  |
| 216208.5  | 213159.5  | 158484.8  | 133993.7  | 127607.2  | 146149.1  | 79723.19  | 123975.7  | 122989.7  | 101950.3  |
| 230559.5  | 214979.7  | 131244.5  | 137101.4  | 172051.8  | 142231.1  | 86075.12  | 128481.6  | 126463.6  | 127815.8  |
| 236768.2  | 215412.7  | 154379.6  | 147038.2  | 139355.3  | 165597.3  | 91063.43  | 113192.3  | 125934.3  | 109508    |

|           |           |           |           |           |           |           |           |           |           |
|-----------|-----------|-----------|-----------|-----------|-----------|-----------|-----------|-----------|-----------|
| LP271.115 | LP271.115 | LP271.153 | LP271.153 | LP271.154 | LP271.154 | LP271.153 | LP271.154 | LP271.154 | LP271.153 |
| 119310    | 102292.5  | 62096.49  | 46753.43  | 73803.65  | 68098.53  | 79832.64  | 65085.97  | 53056.41  | 68449.53  |
| 114321.9  | 111430    | 91130.53  | 45794.19  | 78461.48  | 63782.68  | 73863.09  | 63912.55  | 56773     | 69974.57  |
| 116223.9  | 100232.5  | 102363.9  | 48629.69  | 73531.31  | 64247.2   | 74864.41  | 67436.96  | 53437.64  | 69879.77  |
| 99820.93  | 107395.2  | 77969.13  | 44881.97  | 67930.08  | 63205.6   | 75627.32  | 57277.05  | 54032.85  | 66613.06  |
| 119575.8  | 103422.4  | 103018.1  | 48544.45  | 76463.79  | 73704.04  | 71829.48  | 73821.28  | 55768.04  | 70073.66  |

|           |           |           |           |           |           |           |           |           |           |
|-----------|-----------|-----------|-----------|-----------|-----------|-----------|-----------|-----------|-----------|
| LP271.153 | LP271.154 | LP271.190 | LP271.190 | LP271.190 | LP271.190 | LP271.227 | LP271.227 | LP271.227 | LP271.227 |
| 50885.9   | 49811.21  | 92807.98  | 54255.05  | 67104.78  | 92635.36  | 67322.73  | 64450.79  | 68015.53  | 78298.25  |
| 59381.55  | 52613.84  | 93687.09  | 51226.58  | 69321.85  | 91341.12  | 59660.84  | 63594.66  | 66641.18  | 78679.51  |
| 61605.59  | 55216.34  | 94277.38  | 62989.22  | 75415.3   | 87163.04  | 76220.76  | 58152.47  | 66534.8   | 74280.33  |
| 53304.12  | 52390.62  | 98862.59  | 54153.76  | 61529.72  | 90048.35  | 68389.2   | 56810.66  | 71613.52  | 68961.2   |
| 51516.51  | 54857.84  | 99368.13  | 56525.43  | 76567.97  | 84806.69  | 66409.03  | 61580.28  | 67015.56  | 76078.6   |

|           |           |           |           |           |           |           |           |           |           |
|-----------|-----------|-----------|-----------|-----------|-----------|-----------|-----------|-----------|-----------|
| LP272.118 | LP272.185 | LP272.258 | LP272.258 |
| 25837.42  | 17462.73  | 28299.69  | 25569.79  | 19319.55  | 29448.39  | 42206.32  | 32461.41  | 64539.2   | 28986.51  |
| 22669.74  | 13920.05  | 29297.68  | 24545.6   | 19968.68  | 33977.59  | 47592.96  | 29254.93  | 59874.61  | 29626.43  |
| 24968.05  | 18868.25  | 27151.59  | 22545.26  | 19649.5   | 28349.75  | 41482.73  | 31735.48  | 61735.47  | 24265.85  |
| 21240.67  | 19524.51  | 28745.6   | 21738.93  | 21120.06  | 33692.95  | 46681.1   | 35779.6   | 65547.79  | 25892.85  |
| 19904.72  | 19202.39  | 25910.09  | 23000.27  | 19932.24  | 29647.19  | 43671.85  | 31444.21  | 69107.95  | 36334.37  |

|           |           |           |           |           |           |           |           |           |           |
|-----------|-----------|-----------|-----------|-----------|-----------|-----------|-----------|-----------|-----------|
| LP272.322 | LP272.944 | LP274.164 | LP274.165 | LP274.164 | LP274.164 | LP274.165 | LP274.165 | LP274.164 | LP274.165 |
| 20920.58  | 16586.79  | 45814.14  | 47323.25  | 46746     | 56451.44  | 45375.18  | 58237.94  | 37620.91  | 48368.7   |
| 22132.13  | 11829     | 43874.77  | 45380.24  | 44956.52  | 57177.98  | 47525.55  | 50796.75  | 37235.95  | 48328.09  |
| 19132.39  | 12256.53  | 43528.07  | 38757.43  | 58145.43  | 52662.65  | 63414.67  | 54338.68  | 35143.66  | 50925.02  |
| 20606.6   | 16118.93  | 38767.03  | 53748.28  | 43634.62  | 55172.83  | 48485.04  | 61826.05  | 37728.26  | 47113.81  |
| 20583.03  | 13772.02  | 41779.25  | 51385.03  | 43042.88  | 57324.37  | 49869.18  | 54251.95  | 43472.88  | 52681.88  |

|           |           |           |           |           |           |           |           |           |           |
|-----------|-----------|-----------|-----------|-----------|-----------|-----------|-----------|-----------|-----------|
| LP274.165 | LP274.165 | LP274.164 | LP274.165 |
| 44974.3   | 54491.51  | 43271.65  | 36779.04  | 38159.62  | 56555.59  | 47693.18  | 43447.89  | 39770.16  | 50200.66  |
| 41628.85  | 49031.31  | 37464.13  | 33386.14  | 41646.88  | 54169.54  | 37329.88  | 46347.53  | 38455.2   | 56950.3   |
| 41734.34  | 63940.52  | 50153.16  | 43066.15  | 43886.12  | 61421.68  | 44746.36  | 47198     | 38839.24  | 57202.12  |
| 42729.86  | 53648.95  | 46001.39  | 36138.06  | 43590.84  | 58460.32  | 45665.94  | 48548.83  | 32929.94  | 51216.8   |
| 35000.17  | 53515.58  | 39324.35  | 34217.35  | 37959.5   | 54618.79  | 44164.21  | 45473.04  | 31458.52  | 44986.71  |

|           |           |           |           |           |           |           |           |           |           |
|-----------|-----------|-----------|-----------|-----------|-----------|-----------|-----------|-----------|-----------|
| LP274.165 | LP274.165 | LP274.165 | LP274.165 | LP274.165 | LP274.273 | LP274.273 | LP274.274 | LP274.274 | LP274.274 |
| 54807.08  | 56396.8   | 55491.25  | 45833.44  | 53113.56  | 128698.2  | 127675.9  | 203792.5  | 129616.8  | 247097.9  |
| 57105.09  | 59349.27  | 59236.44  | 46531.72  | 47237.29  | 109268    | 125725.4  | 158926.8  | 139899.5  | 152361.6  |
| 66076.07  | 54286.43  | 63334.69  | 44399.11  | 57173.1   | 131440.2  | 126417.6  | 137341.9  | 109177    | 281774.9  |
| 58362.51  | 55512.62  | 56440.82  | 41706.26  | 49366.24  | 88352.12  | 83967.18  | 157253.6  | 139171.3  | 157745.6  |
| 58716.04  | 53476.9   | 54183.93  | 41820.63  | 41823.06  | 80274.81  | 118423.4  | 194966.7  | 111481.2  | 173123.3  |



|           |           |           |           |           |           |           |           |           |           |           |
|-----------|-----------|-----------|-----------|-----------|-----------|-----------|-----------|-----------|-----------|-----------|
| LP274.274 |
| 126890.4  | 149535.7  | 211445.9  | 80191.62  | 187982.5  | 122540    | 152719.6  | 144029.9  | 245064.7  | 100952.3  |           |
| 113631    | 158893.4  | 174152.3  | 137891.1  | 197519.6  | 135836    | 179786.6  | 142313.8  | 158189.2  | 118561.3  |           |
| 165981.7  | 217890.8  | 169045.7  | 87568.06  | 276042.5  | 126229.6  | 256019.5  | 174284.6  | 211853.2  | 138535.7  |           |
| 115739.8  | 167378.3  | 278518.9  | 117397.7  | 177421.5  | 124665.6  | 182755.7  | 148143.5  | 178410.5  | 123068.1  |           |
| 127585    | 175275.4  | 195308.6  | 157548    | 172298.2  | 119753.1  | 193096.7  | 141644.2  | 193678.1  | 103727    |           |

|           |           |           |           |           |           |           |           |           |           |
|-----------|-----------|-----------|-----------|-----------|-----------|-----------|-----------|-----------|-----------|
| LP274.274 |
| 165184.4  | 125521.9  | 142665.7  | 158826.5  | 117996.3  | 191666.7  | 84644.88  | 130823.8  | 171471.7  | 138800.6  |
| 145573.2  | 128716.6  | 134192.7  | 152281.2  | 153921.2  | 162517.8  | 90294.6   | 125556.9  | 182193.2  | 194711.7  |
| 158769.8  | 122764.2  | 162578    | 179544.7  | 212655.9  | 145585.8  | 87344.16  | 157735.2  | 114716.9  | 173819    |
| 165527    | 165045.2  | 129640.1  | 144703.8  | 159782.8  | 154557.6  | 91530.23  | 117597.5  | 128159.6  | 158969.1  |
| 169562.9  | 114569.7  | 143276    | 143094.6  | 101962.5  | 198050.9  | 81532.48  | 123707.8  | 185577.7  | 236636.2  |

|           |           |           |           |           |           |           |           |           |           |
|-----------|-----------|-----------|-----------|-----------|-----------|-----------|-----------|-----------|-----------|
| LP274.274 |
| 98113.03  | 120918.3  | 72715.05  | 184011.2  | 112688.1  | 231503.8  | 119583.4  | 167442.2  | 167773.4  | 197659    |
| 96861.11  | 119381.7  | 74108.12  | 139823.7  | 111200.3  | 139829.5  | 118676.4  | 127030.5  | 118281.2  | 154047.2  |
| 106598.3  | 94888.36  | 79646.28  | 139157.4  | 154312.7  | 149299.7  | 235866.8  | 116158.8  | 120926.2  | 160664.4  |
| 89751.17  | 117363.8  | 72910.42  | 137729    | 104117.6  | 153407    | 114111.9  | 114121.2  | 116824    | 151694.5  |
| 100134.5  | 100345.7  | 73515.82  | 137310.6  | 115667    | 145116.4  | 102696.8  | 130324.4  | 119096.1  | 150839.5  |

|           |           |           |           |           |           |           |           |           |           |
|-----------|-----------|-----------|-----------|-----------|-----------|-----------|-----------|-----------|-----------|
| LP274.274 |
| 179374.9  | 158151    | 123134.8  | 124788    | 115214.8  | 98882.91  | 116569.9  | 89746.57  | 128195.2  | 83829.1   |
| 177261.2  | 147021.9  | 121828.4  | 120687.1  | 114706.8  | 89237.58  | 114604.6  | 95150.65  | 130393.3  | 80454.25  |
| 144677.7  | 151863.7  | 118404    | 119841.6  | 116249    | 110577.8  | 97926.25  | 107810.4  | 130034.6  | 82687.75  |
| 174660.7  | 139710.4  | 118477.2  | 115123.4  | 119702.9  | 92588.86  | 111552.6  | 91895.85  | 118437.4  | 84727.5   |
| 211984.2  | 134848.1  | 95973.75  | 150204.5  | 110651.6  | 96112.96  | 112103.8  | 88232.29  | 128111.1  | 81974.12  |

|           |           |           |           |           |           |           |           |           |           |
|-----------|-----------|-----------|-----------|-----------|-----------|-----------|-----------|-----------|-----------|
| LP274.274 | LP274.274 | LP274.274 | LP274.274 | LP274.274 | LP274.274 | LP275.163 | LP275.258 | LP275.277 | LP276.180 |
| 77926.25  | 72953.32  | 89390.52  | 67039.84  | 81939.56  | 115551.3  | 12054.56  | 92428.73  | 21827.75  | 76403.62  |
| 67326.42  | 73035.01  | 85221.42  | 63376.84  | 84245.01  | 108848.7  | 13441.06  | 96592.43  | 20218.07  | 80539.51  |
| 67287.1   | 72832.43  | 81684.23  | 57918.11  | 90136.03  | 111472.4  | 12593.46  | 96901.91  | 24985.76  | 82702.65  |
| 70450.56  | 68271.84  | 82053.8   | 60251.64  | 80684.61  | 96946.42  | 11010.64  | 103067.6  | 20882     | 80106.23  |
| 62946.25  | 79216.72  | 84515.11  | 78899.21  | 88182.44  | 105862.7  | 14140.37  | 87980.34  | 23662.75  | 78875.4   |

|           |           |           |           |           |           |           |           |           |           |
|-----------|-----------|-----------|-----------|-----------|-----------|-----------|-----------|-----------|-----------|
| LP276.261 | LP277.18_ | LP277.18_ | LP277.179 | LP277.18_ | LP277.180 | LP277.216 | LP277.216 | LP277.216 | LP277.216 |
| 12820.21  | 54356.09  | 63195.48  | 62853.31  | 71268.77  | 44893.6   | 71467.19  | 59737.16  | 38917.15  | 41406.7   |
| 10394.33  | 47822.69  | 67218.22  | 67366.06  | 61470.84  | 45231.13  | 69982.66  | 59076.5   | 33055.14  | 42980.74  |
| 8286.782  | 48526.78  | 72512.1   | 68487.88  | 63933.74  | 44028.03  | 79242.53  | 60437.52  | 39807.33  | 45280.63  |
| 7660.09   | 39118.1   | 71968.46  | 66366.62  | 75069.93  | 46573.89  | 44809.95  | 31821.46  | 25174.38  | 25889.74  |
| 10615.86  | 45237.92  | 65397.59  | 65585.5   | 65194.07  | 43419.39  | 49705.34  | 35544.46  | 37079.88  | 40442.74  |

|           |           |           |           |           |           |           |          |           |           |
|-----------|-----------|-----------|-----------|-----------|-----------|-----------|----------|-----------|-----------|
| LP277.216 | LP277.216 | LP277.216 | LP278.159 | LP278.159 | LP278.159 | LP278.159 | LP278.16 | LP278.159 | LP278.160 |
| 49417.08  | 62928.41  | 67574.65  | 56918.58  | 85973.94  | 62336.41  | 61530.01  | 58043.51 | 70170.08  | 63662.31  |
| 52110.9   | 61510.2   | 69189.46  | 83477.98  | 71316.35  | 58567.34  | 99548.84  | 58909.62 | 67060.07  | 54867.52  |
| 52129.33  | 77178.22  | 65480.89  | 82559.61  | 64589.05  | 65183.67  | 67446.85  | 52708.56 | 72000.95  | 65090.63  |
| 40102.89  | 66651.53  | 74770.73  | 83595.96  | 64800.61  | 43733.17  | 63269.57  | 56542.75 | 62629.79  | 100480.2  |
| 38461.56  | 52191.27  | 54531.65  | 61360.82  | 95136.11  | 82381.42  | 64700.5   | 45270.03 | 70213.04  | 64755.87  |

|           |           |           |           |           |           |           |           |           |           |
|-----------|-----------|-----------|-----------|-----------|-----------|-----------|-----------|-----------|-----------|
| LP278.159 | LP278.160 | LP278.160 | LP278.16_ | LP278.160 | LP278.160 | LP278.16_ | LP278.159 | LP278.159 | LP278.160 |
| 75853.23  | 81876.62  | 60579.64  | 66218.61  | 77815.69  | 73440.01  | 61703.29  | 59927.81  | 78962.16  | 60348.61  |
| 108891.6  | 74436.79  | 60669.98  | 80070.26  | 74745.26  | 70117.31  | 67624.1   | 57767.89  | 80190.83  | 60498.65  |
| 81140.02  | 74223.97  | 61438.89  | 55781.92  | 78110.27  | 68144.71  | 70732.49  | 56703.15  | 70529.65  | 56075.4   |
| 66722.84  | 79605.07  | 88273.45  | 52373.94  | 74986.49  | 75603.41  | 67043.15  | 65411.13  | 70158.13  | 64408.57  |
| 76161.92  | 78309.41  | 66765.94  | 49387.79  | 75757.02  | 72038.74  | 64394.01  | 54039.25  | 68861.65  | 60702.24  |



|           |           |           |           |           |           |          |           |           |          |
|-----------|-----------|-----------|-----------|-----------|-----------|----------|-----------|-----------|----------|
| LP278.160 | LP278.160 | LP278.159 | LP278.160 | LP278.160 | LP278.160 | LP278.16 | LP278.159 | LP278.160 | LP278.16 |
| 93182.06  | 55235.2   | 90126.25  | 81295.29  | 48468.19  | 64764.66  | 51936.07 | 99778.3   | 58018.02  | 65533.71 |
| 93850.07  | 48967.62  | 93719.86  | 82096     | 42816.39  | 73283.86  | 50890.57 | 100940.3  | 61612.81  | 61983.2  |
| 89134.56  | 46196.72  | 88467.87  | 86635.93  | 48151.75  | 72814.82  | 51650.83 | 98848.34  | 57935.11  | 65545.13 |
| 91163.01  | 50442.68  | 99125.2   | 83154.05  | 44009.31  | 68168.87  | 55944.92 | 98989.66  | 65793.37  | 62461.44 |
| 92908.82  | 49469.48  | 81614.09  | 87317.74  | 51776.38  | 67772.58  | 51589.23 | 101996.7  | 64517.33  | 63147.08 |

|           |           |           |           |           |           |           |           |           |           |
|-----------|-----------|-----------|-----------|-----------|-----------|-----------|-----------|-----------|-----------|
| LP278.160 | LP278.160 | LP278.16_ | LP278.159 | LP278.160 | LP278.16_ | LP278.159 | LP278.159 | LP278.160 | LP278.245 |
| 49717.41  | 56034.23  | 41101.75  | 58491.59  | 41699.28  | 47130.15  | 66912.31  | 45402.18  | 68304.7   | 54954.13  |
| 50532.66  | 61884.75  | 51170.9   | 56395.04  | 42105.27  | 49823.48  | 58315.08  | 54341     | 71751.42  | 57261.9   |
| 45430.56  | 47688.82  | 37638.03  | 56376.65  | 46365.55  | 46363.19  | 60584.79  | 45407.75  | 71034.53  | 56807.94  |
| 49288.23  | 60632.17  | 41870.78  | 58313.79  | 47064.27  | 47280.12  | 64006.91  | 44242.91  | 72612.14  | 61575.57  |
| 50269.3   | 59747.14  | 44597.07  | 56282.34  | 39046.93  | 46931.5   | 69459.06  | 44469.28  | 73409.95  | 54758.28  |

|           |           |           |           |           |           |           |           |           |           |           |
|-----------|-----------|-----------|-----------|-----------|-----------|-----------|-----------|-----------|-----------|-----------|
| LP279.231 |
| 17291971  | 842146    | 656393.3  | 237003.2  | 15493309  | 1301529   | 19451905  | 15816128  | 14552705  | 19423576  |           |
| 17153979  | 13377056  | 18547664  | 15564196  | 16494807  | 17689197  | 17743463  | 14350941  | 13879914  | 20456805  |           |
| 3095081   | 1477901   | 1188313   | 174302    | 19468352  | 2334944   | 3436426   | 18665923  | 17120542  | 21442160  |           |
| 3867585   | 15988716  | 19969400  | 17662634  | 3010433   | 19582001  | 21594314  | 17146942  | 15030014  | 18946945  |           |
| 22179561  | 15391278  | 20106279  | 16727612  | 19092947  | 18789400  | 21154099  | 16440252  | 15867902  | 18324304  |           |

|           |           |           |           |           |           |           |           |           |           |
|-----------|-----------|-----------|-----------|-----------|-----------|-----------|-----------|-----------|-----------|
| LP279.231 |
| 10036560  | 13779888  | 9174219   | 9826252   | 6354889   | 10177655  | 9855479   | 9326263   | 17850735  | 8539955   |
| 9391394   | 13112586  | 8624811   | 9226612   | 6445184   | 9661642   | 8999870   | 9121807   | 17370336  | 8449558   |
| 13282186  | 197190.9  | 10227521  | 291769.7  | 7635411   | 332208.3  | 12364056  | 12835353  | 20184757  | 48830.44  |
| 11854805  | 15024809  | 8928463   | 10454539  | 6226072   | 10382844  | 9587131   | 10736875  | 18000403  | 8923395   |
| 11384954  | 14162340  | 7872821   | 10583320  | 5900914   | 9965056   | 9233544   | 10432362  | 16936517  | 9086285   |

|           |           |           |           |           |           |           |           |           |           |
|-----------|-----------|-----------|-----------|-----------|-----------|-----------|-----------|-----------|-----------|
| LP279.304 | LP280.235 | LP280.263 | LP281.048 | LP281.050 | LP281.136 | LP281.137 | LP281.137 | LP281.136 | LP281.136 |
| 15909.64  | 48274.44  | 51671.43  | 42765.22  | 30315.11  | 71043.94  | 61507.12  | 60230.31  | 74335.02  | 47199.65  |
| 18505.99  | 674275.3  | 48925.39  | 41849.88  | 34269.8   | 45866.79  | 51719.14  | 43593.79  | 73581.16  | 53866.45  |
| 17450.34  | 710670.9  | 44676.54  | 38703.39  | 31777.45  | 43633.51  | 53762.6   | 39890.47  | 56810.7   | 60116.56  |
| 12134.74  | 752616.3  | 48659.02  | 41424.86  | 30962.51  | 34417.93  | 58699.08  | 40241.32  | 91589.58  | 61957.23  |
| 13476.02  | 709037    | 44380.28  | 37287.87  | 31722.01  | 32152.59  | 51859.24  | 39053.69  | 65459.74  | 55536.09  |

|           |           |           |           |           |           |           |           |           |           |
|-----------|-----------|-----------|-----------|-----------|-----------|-----------|-----------|-----------|-----------|
| LP281.136 | LP281.137 | LP281.136 |
| 71800.44  | 45055.41  | 45364.28  | 56838.09  | 61530.97  | 58891.99  | 36173.47  | 42868.69  | 56410.6   | 43044.45  |
| 63318.55  | 40386.64  | 56381.14  | 60043.62  | 54489.25  | 54636.34  | 59160.3   | 40879.86  | 55233.49  | 44590.01  |
| 68496.84  | 44579.17  | 50094.95  | 63106.95  | 58373.49  | 56650.72  | 56478.52  | 59357.52  | 52471.73  | 47589.09  |
| 66629.95  | 44805.07  | 47908.1   | 71028.66  | 51650.24  | 57928.62  | 57546.01  | 66029.86  | 57373.17  | 43173.87  |
| 76279.27  | 45022.56  | 51313.15  | 58310.15  | 57513.36  | 61010.04  | 58965.71  | 57355.65  | 61522.06  | 43468.35  |

|           |           |           |           |           |           |           |           |           |           |
|-----------|-----------|-----------|-----------|-----------|-----------|-----------|-----------|-----------|-----------|
| LP281.136 | LP281.136 | LP281.136 | LP281.136 | LP281.136 | LP281.137 | LP281.136 | LP281.136 | LP281.136 | LP281.136 |
| 52955.49  | 37831.05  | 43298.55  | 62669.01  | 59735.57  | 68923.91  | 41221.93  | 46516.38  | 37497.89  | 44953.86  |
| 46453.76  | 40930.33  | 58755.03  | 59378.9   | 70948.65  | 58388.5   | 42774.69  | 49843.35  | 36306.7   | 56375.28  |
| 48772.55  | 36858.32  | 57892.57  | 63782.49  | 69901.31  | 54167.95  | 40887.32  | 65967.22  | 41971.86  | 53529.48  |
| 47502.19  | 38857.19  | 66327.74  | 65132.95  | 72994.27  | 49573.68  | 41463.83  | 45702.88  | 38844.33  | 47355.39  |
| 50668     | 34394.7   | 58356.67  | 58220.59  | 54550.76  | 62886.2   | 37734.49  | 50414.04  | 33491.1   | 48524.21  |

|           |           |           |           |           |           |           |           |           |           |
|-----------|-----------|-----------|-----------|-----------|-----------|-----------|-----------|-----------|-----------|
| LP281.136 | LP281.136 | LP281.136 | LP281.136 | LP281.137 | LP281.136 | LP281.136 | LP281.136 | LP281.136 | LP281.137 |
| 37371.26  | 66279.6   | 48919.74  | 48133.92  | 46026.76  | 51657.42  | 54042.91  | 51280.23  | 75139.21  | 67212.45  |
| 37500.95  | 62486.11  | 63310.24  | 51989.75  | 53959.04  | 57896.76  | 43830.82  | 51498.38  | 72609.89  | 65766.11  |
| 40594.43  | 60035.43  | 63503.03  | 51993.98  | 49132.35  | 59677.19  | 47042.16  | 52230.79  | 77657.76  | 65578.43  |
| 34739.22  | 63195.28  | 63530.92  | 53625.37  | 42311.85  | 52677.53  | 45252.33  | 51813.49  | 77161.5   | 67556.1   |
| 35362.82  | 62711.21  | 56334.23  | 42100.33  | 52435.31  | 47056.59  | 44696.17  | 48503.57  | 70426.95  | 68692.89  |



|           |           |           |           |           |           |           |           |           |           |
|-----------|-----------|-----------|-----------|-----------|-----------|-----------|-----------|-----------|-----------|
| LP281.136 | LP281.137 |
| 60769.13  | 55227.9   | 60360.7   | 44083.89  | 69251.35  | 44771.2   | 37737.59  | 74066.15  | 52288.74  | 64468.44  |
| 61687.95  | 50541.12  | 59056.09  | 44649.55  | 66425.69  | 43228.64  | 37494.56  | 70473.76  | 49495.83  | 63325.45  |
| 58726.81  | 50627.39  | 57744.97  | 45031.2   | 67658.66  | 47231.14  | 36498.49  | 74131.91  | 45120.37  | 63136.4   |
| 60720.41  | 48775.48  | 57459.4   | 41346.63  | 68395.98  | 50878.15  | 34268.46  | 73110.76  | 46380.46  | 57204.7   |
| 59476.3   | 51715.43  | 60410.4   | 45176.32  | 67656.98  | 42795.01  | 36174.94  | 73470.55  | 50355.83  | 58682.03  |

|           |           |           |           |           |           |           |           |           |           |
|-----------|-----------|-----------|-----------|-----------|-----------|-----------|-----------|-----------|-----------|
| LP281.136 |
| 55598.59  | 48412.52  | 63522.36  | 45084.57  | 73566.81  | 76121.82  | 47185     | 50791.67  | 52273.45  | 21757.23  |
| 54275.62  | 52252.36  | 64405.14  | 51306.84  | 76769.07  | 72042.88  | 44307.89  | 52960.53  | 49418.06  | 23295.19  |
| 61367.61  | 50509.01  | 58431.49  | 53269.44  | 72699.84  | 71452.23  | 47892.81  | 58461.22  | 54428.15  | 23068.67  |
| 61881.94  | 52131.29  | 58694.71  | 50692.16  | 75958.18  | 70774.7   | 48061.1   | 50988.68  | 53477.04  | 22066.95  |
| 56161.65  | 49008.01  | 61888.47  | 46754.14  | 71738.82  | 75101.33  | 46568.87  | 47982.94  | 49612.84  | 21531.89  |

|           |           |           |           |           |           |           |           |           |           |
|-----------|-----------|-----------|-----------|-----------|-----------|-----------|-----------|-----------|-----------|
| LP281.136 | LP281.137 | LP281.136 | LP281.165 | LP281.165 | LP281.165 | LP281.165 | LP281.165 | LP281.164 | LP281.165 |
| 39469.55  | 33941.86  | 50698.99  | 86424.69  | 214213.7  | 358569.8  | 212276.7  | 364313.1  | 205895.1  | 289921.1  |
| 32475.05  | 28233.24  | 42940.86  | 82090.58  | 216269.1  | 323356.3  | 208241    | 366430.4  | 202851.7  | 278110.6  |
| 43308.92  | 31437.53  | 47496.63  | 83495.85  | 221394.5  | 314948.7  | 225993.8  | 348222.5  | 216019.1  | 252410.5  |
| 39040.5   | 34451.05  | 42666.58  | 75772.11  | 222262    | 334909.6  | 248729.5  | 350043    | 197189.4  | 252297.5  |
| 35335.67  | 28179.41  | 40991.73  | 72984.23  | 205259.5  | 316982.1  | 231582    | 369230.8  | 211043.6  | 286500.2  |

|           |           |           |           |           |           |           |           |           |           |
|-----------|-----------|-----------|-----------|-----------|-----------|-----------|-----------|-----------|-----------|
| LP281.165 | LP281.164 | LP281.165 |
| 295438    | 149256    | 281485.2  | 200005.2  | 246771.1  | 259060.2  | 221196.8  | 266347.7  | 363938.7  | 148496.8  |
| 296069.8  | 155060.7  | 300272.9  | 208919.3  | 234482.2  | 258748.4  | 212596.1  | 243288.8  | 391216.4  | 149462.5  |
| 273871.1  | 168424.6  | 291667.8  | 204037.7  | 213975.7  | 241240.1  | 220423.1  | 271362.4  | 358548.5  | 140481.2  |
| 281753.8  | 167504.7  | 316690.6  | 196303.6  | 241428.6  | 240023.2  | 225245    | 266576.3  | 364219.5  | 147339    |
| 281883.7  | 166782.8  | 313959.7  | 201248.3  | 211527.4  | 264794.6  | 213085.1  | 245823.2  | 360219.7  | 159629.6  |

|           |           |           |           |           |           |           |           |           |           |
|-----------|-----------|-----------|-----------|-----------|-----------|-----------|-----------|-----------|-----------|
| LP281.165 |
| 297340.4  | 229255.8  | 302538    | 240372.1  | 198153.2  | 272777.3  | 173328    | 232497.5  | 177086.6  | 265619.3  |
| 289639.5  | 216918    | 310479.8  | 254786.9  | 191270.5  | 274788.4  | 177742.1  | 236324    | 193741.5  | 252664.5  |
| 291802.4  | 231455.9  | 304993.6  | 242624.2  | 202823.4  | 307435.7  | 176865.8  | 242549    | 185640.3  | 265585.3  |
| 300432.4  | 231168.2  | 312673.2  | 265861.6  | 212940.5  | 332203    | 167384.7  | 242461.7  | 177975.4  | 283542.7  |
| 292534.8  | 232874.9  | 309330.8  | 255835.2  | 203558.3  | 329283.8  | 184907.6  | 271523.8  | 174765.7  | 278209.3  |

|           |           |           |           |           |           |           |           |           |           |
|-----------|-----------|-----------|-----------|-----------|-----------|-----------|-----------|-----------|-----------|
| LP281.165 |
| 233950.5  | 197139.9  | 243893.9  | 278997.4  | 219800.2  | 179118.6  | 255748.8  | 161661.7  | 349574.1  | 212399.9  |
| 209572    | 202861    | 233576.1  | 291264    | 226467.3  | 173915.3  | 252700.8  | 155538.2  | 327259.2  | 202149.2  |
| 225085.7  | 193683.7  | 236671.7  | 275257.6  | 220910.2  | 159598.8  | 247114    | 166525    | 344784.9  | 208594.7  |
| 246021.7  | 225666.5  | 242792.6  | 302753.4  | 208613.1  | 163283.1  | 258380.4  | 164240.8  | 335653.5  | 196910    |
| 207606.5  | 213784.9  | 253288.1  | 285991.6  | 199388.3  | 172148.4  | 269516.3  | 150522.2  | 336817.6  | 197920.7  |

|           |           |           |           |           |           |           |           |           |           |
|-----------|-----------|-----------|-----------|-----------|-----------|-----------|-----------|-----------|-----------|
| LP281.165 |
| 208204.4  | 330631.6  | 221074    | 175951.8  | 242257.1  | 264565.1  | 191820.6  | 128047    | 174182.9  | 159921.7  |
| 211797    | 319121.8  | 203149.1  | 164875.8  | 233701.8  | 265769.7  | 184532.9  | 139878.5  | 177173.6  | 170646.5  |
| 218868.1  | 320312.3  | 233358.4  | 186713    | 225500.8  | 251205.5  | 194839.3  | 136914.1  | 168506.1  | 156585.6  |
| 206063.8  | 357233.8  | 228881    | 190087.7  | 256201.3  | 278314    | 193458.2  | 135299.2  | 178345    | 156208.5  |
| 199054.9  | 369149.6  | 208837    | 193870.9  | 246671.3  | 279659.9  | 194177.9  | 134971.9  | 178154.7  | 166984.2  |

|           |           |           |           |           |           |           |           |           |           |
|-----------|-----------|-----------|-----------|-----------|-----------|-----------|-----------|-----------|-----------|
| LP281.165 |
| 131380    | 134927.4  | 243578    | 138802.9  | 182905.4  | 153455.6  | 175121.2  | 171178.2  | 169545.9  | 229384.9  |
| 137489.9  | 133135.9  | 260099.2  | 138715    | 165055.4  | 145602.2  | 169330.5  | 167059.2  | 163880.5  | 232945.7  |
| 122633.2  | 136863.7  | 244901.8  | 135155.5  | 184815.2  | 144545.1  | 160979.5  | 175505    | 166069    | 221324.5  |
| 136926.1  | 139049.6  | 255120.8  | 128703.7  | 196835.6  | 140353.1  | 158284.2  | 166151.8  | 167933.2  | 241695.8  |
| 135939.8  | 135688.8  | 245193.1  | 127860.7  | 183754.7  | 140920.4  | 173715.3  | 170960.9  | 161743.3  | 223466.6  |



|           |           |           |           |           |           |           |           |           |           |
|-----------|-----------|-----------|-----------|-----------|-----------|-----------|-----------|-----------|-----------|
| LP281.165 | LP281.173 | LP281.174 | LP281.173 | LP281.190 | LP281.210 | LP281.211 | LP281.210 | LP281.211 | LP281.210 |
| 66745.66  | 79039.72  | 337722.4  | 275764.2  | 18274.18  | 220147.7  | 244290.3  | 164504.2  | 53062     | 32651.9   |
| 71819.69  | 79217.05  | 361522.9  | 269251.3  | 63299.64  | 239985.5  | 258194.4  | 169563.8  | 275679.7  | 183308    |
| 68229.38  | 78595.72  | 353427.7  | 287126.8  | 24005.69  | 247762.5  | 249437.4  | 183492.6  | 265731.9  | 163184.9  |
| 67598.94  | 83346.45  | 362123.9  | 302127.6  | 24755.24  | 119244.1  | 96278.68  | 59392.71  | 275430.6  | 173672.9  |
| 70157.78  | 81383.53  | 381863    | 315422.2  | 73223.89  | 129287    | 268016.1  | 173753.1  | 280276.6  | 178880.2  |

|           |           |           |           |           |           |           |           |           |           |
|-----------|-----------|-----------|-----------|-----------|-----------|-----------|-----------|-----------|-----------|
| LP281.211 | LP281.210 | LP281.211 | LP281.211 | LP281.210 | LP281.247 | LP281.247 | LP281.247 | LP281.247 | LP281.247 |
| 103663.2  | 227959.8  | 232189.4  | 337233.8  | 439026.1  | 330984.6  | 249784    | 250272.4  | 292767.6  | 284808.8  |
| 113968.9  | 237439.1  | 237217.8  | 355177.5  | 444864.5  | 331710.3  | 217433.9  | 261504    | 282902.9  | 284530.4  |
| 110178.3  | 249216.6  | 245442.4  | 353282.4  | 462296.8  | 359535.5  | 252793.1  | 283459    | 301410    | 314042.3  |
| 44301.06  | 245400.7  | 240134.6  | 111819.1  | 511654.4  | 375836.8  | 232951.4  | 261842.2  | 313536.2  | 303193.6  |
| 116040.5  | 88581.39  | 263785.5  | 369614.8  | 172788    | 169161.4  | 251138.6  | 270907.6  | 322582.5  | 311481.4  |

|           |           |           |           |           |           |           |           |           |           |
|-----------|-----------|-----------|-----------|-----------|-----------|-----------|-----------|-----------|-----------|
| LP281.247 | LP281.248 | LP281.248 | LP282.168 |
| 210238.7  | 229970.5  | 76485.68  | 285334.8  | 403601.7  | 263189.8  | 245249    | 299537.5  | 250730.2  | 128427.6  |
| 214606.9  | 225442.7  | 190490.1  | 324565    | 374132.1  | 262112.1  | 246291.5  | 275308.8  | 242304.8  | 141179.4  |
| 210513.9  | 219964.4  | 188594.9  | 327064.9  | 373602.3  | 276596.7  | 222239.3  | 266939.3  | 255834    | 121762.7  |
| 241758.6  | 231094.4  | 193047    | 333971.2  | 419311    | 288923.6  | 240521    | 296121.9  | 243415.4  | 118175.6  |
| 219358.4  | 240961.6  | 189257.1  | 343331.5  | 173204.2  | 279028.8  | 263047.3  | 269056.4  | 239842.9  | 135988.4  |

|           |           |           |           |           |           |           |           |           |           |
|-----------|-----------|-----------|-----------|-----------|-----------|-----------|-----------|-----------|-----------|
| LP282.168 | LP282.168 | LP282.169 | LP282.168 | LP282.278 | LP282.279 | LP282.279 | LP282.279 | LP282.279 | LP282.279 |
| 130283.8  | 145545    | 102992    | 150903.3  | 324230.9  | 348944.5  | 714521.1  | 369218.9  | 428168.8  | 414571.6  |
| 110022.7  | 136556.7  | 110279.1  | 145074.9  | 424105.6  | 258202    | 423088.3  | 379537.9  | 382907.1  | 285115.6  |
| 102644.5  | 136132.7  | 106540.9  | 136058.9  | 277943.8  | 305485.3  | 793197.6  | 475185.9  | 373881.3  | 289568.9  |
| 108116    | 137563.7  | 104865.8  | 140099.1  | 279193.1  | 359387    | 568079.9  | 402122.9  | 438125.4  | 371092.9  |
| 135003.6  | 152622.3  | 125373.3  | 172249.7  | 526868.5  | 308672.7  | 802801.6  | 330997.5  | 348581.7  | 252439.3  |

|           |           |           |           |           |           |           |           |           |           |
|-----------|-----------|-----------|-----------|-----------|-----------|-----------|-----------|-----------|-----------|
| LP282.279 | LP282.278 | LP282.279 |
| 269625.7  | 243217.4  | 437652.8  | 826243.4  | 183405.8  | 618951.6  | 428921.8  | 693710.7  | 727800.3  | 511305.7  |
| 409221.6  | 279412.7  | 565508.7  | 760406.8  | 205230.9  | 634016    | 324098.2  | 658080.2  | 791007.2  | 587142.3  |
| 282116    | 259125.8  | 545767.5  | 638916.7  | 194382.2  | 687382.7  | 386271.6  | 727985.8  | 542399.4  | 352911.1  |
| 315864.2  | 329740.6  | 511617.6  | 659783.4  | 225711.1  | 837371.2  | 299497.3  | 666101.6  | 526195.6  | 365792    |
| 259220.4  | 224378    | 527703.1  | 925004.7  | 174695    | 585713    | 421694.8  | 538247.8  | 509711.4  | 354408.1  |

|           |           |           |           |           |           |           |           |           |           |
|-----------|-----------|-----------|-----------|-----------|-----------|-----------|-----------|-----------|-----------|
| LP282.279 |
| 393334.8  | 455906    | 281318.3  | 450601.4  | 307746.1  | 451191.2  | 350276.8  | 382089    | 694774.6  | 475152    |
| 301117.2  | 520933    | 335943.7  | 467997.7  | 349357.5  | 521834.2  | 382694.6  | 256989.2  | 641218.4  | 425766.9  |
| 319899.6  | 372727.8  | 309592.4  | 441401.4  | 349291.4  | 485283.4  | 573407.4  | 379301.6  | 649172.9  | 538740.7  |
| 375883.3  | 555546.2  | 272786.3  | 400180.2  | 286512.8  | 476677.1  | 285200.9  | 356372.3  | 651756.7  | 415408.3  |
| 345233.4  | 465128.2  | 279536.4  | 383792.8  | 308156.8  | 317796.9  | 408327.1  | 366321.2  | 643308.7  | 373136.1  |

|           |           |           |           |           |           |           |           |           |           |
|-----------|-----------|-----------|-----------|-----------|-----------|-----------|-----------|-----------|-----------|
| LP282.279 |
| 255940.1  | 114154.2  | 445711.2  | 320152.9  | 288776.4  | 355604.3  | 399478.9  | 329134.7  | 321113.8  | 348375    |
| 343964.4  | 117168.9  | 435167    | 353359.7  | 476297.2  | 333007.5  | 520113.2  | 325863.3  | 439282.2  | 372987.2  |
| 341207.5  | 145223.3  | 443486.8  | 471006.5  | 405392.3  | 434745.5  | 461939.2  | 444405.3  | 501485.5  | 364665.6  |
| 269675.7  | 128845.6  | 357241.8  | 326655.2  | 347010.4  | 314411.8  | 538152.5  | 529112.2  | 668320.7  | 363889.4  |
| 377131.5  | 116025.8  | 383118.2  | 332210.9  | 342381.9  | 457062    | 461846.3  | 308696.4  | 336143.3  | 377407.3  |

|           |           |           |           |           |           |           |           |           |           |
|-----------|-----------|-----------|-----------|-----------|-----------|-----------|-----------|-----------|-----------|
| LP282.279 |
| 103343.9  | 302282    | 551058.1  | 394416.6  | 325109.4  | 439133.6  | 210849.8  | 212458.8  | 490562.7  | 186954.9  |
| 208109.9  | 376619.5  | 435798.6  | 387989.4  | 250338.4  | 430346.1  | 195126.5  | 258827.9  | 488080.1  | 292243.6  |
| 208833.1  | 409755.1  | 400368    | 479125.8  | 264744.8  | 391974.5  | 288070.1  | 266027.9  | 458661.3  | 208269.1  |
| 188614.9  | 384545.5  | 401637.7  | 415468.7  | 326256.9  | 427663.9  | 213990.4  | 215233.5  | 458672.1  | 301463.4  |
| 172387.9  | 385094.8  | 384865.8  | 351273.5  | 327494.5  | 383454.4  | 207989.9  | 200460.8  | 508823.5  | 201382.1  |



|           |           |           |           |           |           |           |           |           |           |
|-----------|-----------|-----------|-----------|-----------|-----------|-----------|-----------|-----------|-----------|
| LP282.279 |
| 186269    | 217522    | 201303    | 223348.9  | 389693.3  | 310248.7  | 241992.2  | 315583.1  | 195788.7  | 162861.2  |
| 209084.3  | 232317.2  | 205373.8  | 225954.3  | 390222.2  | 330760    | 274731    | 307068.4  | 215225.1  | 169513.8  |
| 205303.3  | 213151    | 194832.3  | 209019    | 394267.7  | 273930.2  | 247865.4  | 322142.1  | 211906.8  | 168932.4  |
| 185694.5  | 215293.1  | 287601.3  | 209308.7  | 382212.2  | 185907    | 246125.4  | 312773.1  | 203861.9  | 173696.3  |
| 198646.2  | 208508.8  | 181693.1  | 207696.1  | 378998.5  | 308087.4  | 221464.3  | 304950.4  | 199462.7  | 177012.5  |

|           |           |           |           |           |           |           |           |           |           |
|-----------|-----------|-----------|-----------|-----------|-----------|-----------|-----------|-----------|-----------|
| LP282.279 | LP282.279 | LP282.279 | LP282.279 | LP282.904 | LP283.115 | LP283.115 | LP283.115 | LP283.115 | LP283.115 |
| 165418.9  | 222802    | 159468.3  | 197802.6  | 13659.08  | 135390.2  | 105823.8  | 116198.5  | 130839.9  | 215143.2  |
| 170006.5  | 232534.8  | 158790.2  | 166411.5  | 16764.89  | 167642.2  | 194885.7  | 120914.1  | 157949.8  | 104575.9  |
| 163943.8  | 288208    | 157102.1  | 215993.4  | 11631.55  | 99208.71  | 117476.8  | 108748.7  | 99460.02  | 164944.2  |
| 177122.8  | 240013.3  | 172861    | 197267.2  | 6860.812  | 143399.3  | 123700.4  | 107035.6  | 122902.2  | 187510.9  |
| 191758.9  | 176129.8  | 148205.8  | 210114    | 11918.91  | 145060.2  | 144567.7  | 139003.1  | 109850.5  | 135411.3  |

|           |           |           |           |           |           |           |           |           |           |
|-----------|-----------|-----------|-----------|-----------|-----------|-----------|-----------|-----------|-----------|
| LP283.115 |
| 145835.8  | 234368    | 160676.4  | 145915.1  | 97195.29  | 123201.2  | 211142.2  | 169716.7  | 141309.1  | 132597.8  |
| 115839.2  | 176155    | 120306    | 124091.5  | 97008.85  | 135546.2  | 153030.2  | 187571.7  | 133035.5  | 102438.2  |
| 172596    | 115882.2  | 150829.8  | 128206    | 122779.6  | 149617.8  | 113761.1  | 100957.3  | 146343.3  | 113115.9  |
| 127654.9  | 148343.9  | 186506.2  | 109541.5  | 123955.1  | 165842.1  | 125207    | 182670.3  | 101281    | 128950.7  |
| 169760.6  | 190345.7  | 104151.4  | 114521.7  | 101928.3  | 123974.1  | 206020.2  | 128723.7  | 118912.9  | 154186.7  |

|           |           |           |           |           |           |           |           |           |           |
|-----------|-----------|-----------|-----------|-----------|-----------|-----------|-----------|-----------|-----------|
| LP283.115 |
| 193469.9  | 134745.3  | 192135.7  | 110171.5  | 148203.8  | 144849.9  | 105075.5  | 119690.8  | 109533.7  | 102375.2  |
| 108229.9  | 189024.3  | 163624.7  | 139157.5  | 82627.78  | 123790.6  | 106575.5  | 151571    | 152420.3  | 126184.9  |
| 130098.6  | 123292.9  | 178653.9  | 140997.1  | 132137    | 166695.1  | 107519.9  | 106151.2  | 157348.1  | 131380.8  |
| 148237.6  | 125929.8  | 181658.1  | 131497.3  | 141121.9  | 146805.4  | 178785.3  | 141279.1  | 94220.19  | 135899.1  |
| 114730    | 176703.9  | 104329.2  | 151620.1  | 110268.6  | 189701.2  | 152295.1  | 114612.3  | 117601.7  | 109644.7  |

|           |           |           |           |           |           |           |           |           |           |
|-----------|-----------|-----------|-----------|-----------|-----------|-----------|-----------|-----------|-----------|
| LP283.115 |
| 100716.6  | 129885    | 130963.4  | 151530    | 144973.8  | 177006.7  | 146580.2  | 118458.1  | 129794.4  | 133799    |
| 127927.7  | 111437.8  | 145517.8  | 131165.5  | 130746.2  | 120776.8  | 142359.6  | 170154.4  | 127583.8  | 136696.3  |
| 127793.4  | 149755.3  | 136452.2  | 115009.4  | 147376.4  | 159252.4  | 178355.5  | 138998.5  | 177161.6  | 140228.3  |
| 99384.83  | 173355.8  | 123490    | 191648.9  | 132823.1  | 134976.4  | 109271.9  | 128369.8  | 145462.7  | 142670.4  |
| 183130.6  | 164003.2  | 154661.3  | 130993.8  | 137173.4  | 183881.6  | 171817.7  | 98204.61  | 133394.6  | 119957    |

|           |           |           |           |           |           |           |           |           |           |
|-----------|-----------|-----------|-----------|-----------|-----------|-----------|-----------|-----------|-----------|
| LP283.115 |
| 108776.8  | 114367.8  | 118803.1  | 158653.1  | 200377.4  | 150090.1  | 125919.9  | 178349    | 91517.22  | 127660.6  |
| 113363.6  | 213508.6  | 118376.7  | 156379.8  | 213076.5  | 158818.9  | 118335.4  | 209378.1  | 95025.01  | 83979.79  |
| 119525.8  | 156034.5  | 214521.6  | 94260.78  | 160369.4  | 181938.2  | 112449    | 130274.9  | 114247.5  | 89294.41  |
| 121145    | 112200.9  | 158683.5  | 112490.5  | 155322.4  | 159965.2  | 102800.2  | 160639.6  | 137236.1  | 105937.1  |
| 106843.5  | 130033.9  | 152292.7  | 86217.02  | 174992.6  | 129787    | 150629.2  | 116214.6  | 97037.33  | 122252.8  |

|           |           |           |           |           |           |           |           |           |           |
|-----------|-----------|-----------|-----------|-----------|-----------|-----------|-----------|-----------|-----------|
| LP283.115 |
| 144842.7  | 117478.4  | 116735.4  | 81480.68  | 156697.1  | 155017    | 133182.9  | 133122.8  | 144440    | 176353.9  |
| 188005.4  | 125594.7  | 126704.2  | 80139.58  | 141696.2  | 170460.9  | 135036.9  | 119763.7  | 150860    | 127454.9  |
| 110919.1  | 169789.2  | 152366.4  | 76359.98  | 176670.6  | 140087.6  | 167131.2  | 116139.5  | 150503.6  | 120322.8  |
| 134027.8  | 109207.8  | 165361.5  | 73066.48  | 134305.7  | 182710.9  | 118384.7  | 113907.9  | 86794.58  | 136671.5  |
| 128672.2  | 155063.2  | 115242.7  | 71624.11  | 122667    | 173431.3  | 116283.9  | 128544    | 109307.6  | 145647.5  |

|           |           |           |           |           |           |           |           |           |           |
|-----------|-----------|-----------|-----------|-----------|-----------|-----------|-----------|-----------|-----------|
| LP283.115 |
| 104778.3  | 110888.7  | 73972.2   | 126877.6  | 91199.5   | 153822.1  | 107061.3  | 141565    | 132583.9  | 117954.7  |
| 82584.31  | 120223.9  | 65123.99  | 119734    | 121560.6  | 115370.2  | 123795.8  | 87232.02  | 110379.7  | 134765.5  |
| 130520.5  | 114229    | 69161.87  | 145157.7  | 117807    | 91027.28  | 135306.7  | 107544.4  | 118266.4  | 105353.9  |
| 117868.1  | 137273    | 62463.28  | 131815.9  | 108532.5  | 158927.6  | 131657.9  | 125860.1  | 98827.1   | 109342    |
| 87870.06  | 189836.7  | 60700.81  | 141682.9  | 121577.9  | 124720.8  | 119991    | 109074.1  | 114029.2  | 80246.99  |



|           |           |           |           |           |           |           |           |           |           |
|-----------|-----------|-----------|-----------|-----------|-----------|-----------|-----------|-----------|-----------|
| LP283.115 |
| 135751.8  | 128713.7  | 111909.3  | 67270.31  | 118414.3  | 82910.63  | 122024.6  | 58801.6   | 69897.02  | 64548.56  |
| 91903.14  | 162735.9  | 111223.3  | 59246.09  | 99827.11  | 59702.59  | 94429.84  | 73051.06  | 66985.24  | 63050.12  |
| 91711.05  | 132618.9  | 109653    | 48840.6   | 95350.78  | 57521.25  | 82830.22  | 60558.18  | 76132.41  | 70218.34  |
| 130615.3  | 183712.3  | 113676    | 57951.54  | 103241.9  | 53728.99  | 114869.3  | 53828.31  | 53634.69  | 55502.2   |
| 105564    | 140067.8  | 122526.3  | 81449.69  | 96701.81  | 58190.34  | 96497.93  | 55542.26  | 56834.08  | 54831.43  |

|           |           |           |           |           |           |           |           |           |           |
|-----------|-----------|-----------|-----------|-----------|-----------|-----------|-----------|-----------|-----------|
| LP283.115 | LP283.115 | LP283.115 | LP283.115 | LP283.115 | LP283.115 | LP283.153 | LP283.152 | LP283.153 | LP283.152 |
| 60702.31  | 72993.74  | 66680.73  | 59129.29  | 68325.34  | 63060.22  | 70099.24  | 69666.2   | 75805.45  | 62615.49  |
| 59965.98  | 68692.91  | 49666.73  | 61499.34  | 65998.43  | 60992.46  | 78559.75  | 57025.72  | 69468.18  | 61167.32  |
| 62431.5   | 62562.23  | 53758.87  | 56361     | 58822.54  | 74609.27  | 73783.9   | 58037.31  | 71932.98  | 59987.74  |
| 54728.37  | 77219.9   | 45495     | 56239.59  | 46086.16  | 60301.54  | 74092.83  | 58199     | 70971.77  | 65846.8   |
| 60423.34  | 60528.03  | 40886.77  | 53521.76  | 68424.8   | 55484.96  | 80544.6   | 73181.86  | 70411.45  | 62936.62  |

|           |           |           |           |           |           |           |           |           |           |
|-----------|-----------|-----------|-----------|-----------|-----------|-----------|-----------|-----------|-----------|
| LP283.153 | LP283.153 | LP283.153 | LP283.153 | LP283.190 | LP283.190 | LP283.190 | LP283.190 | LP283.190 | LP283.190 |
| 73979.43  | 73325.15  | 97436.87  | 108466.2  | 96481.07  | 70533.98  | 76494.14  | 59733.28  | 76312.14  | 54201.31  |
| 67027.29  | 67853.08  | 96934.85  | 102156.9  | 89175.16  | 70485.94  | 76774.52  | 63687.16  | 76420.02  | 52719.53  |
| 71381.83  | 71432.07  | 101107    | 101969.5  | 90663.73  | 70387.26  | 73227.83  | 59684.67  | 76264.2   | 59701.51  |
| 77860.96  | 70123.41  | 99063.87  | 110163.9  | 106299.6  | 67073.42  | 78850.97  | 64670.69  | 79807.18  | 58234.8   |
| 76774.45  | 68328.28  | 100729    | 105636.4  | 102090.1  | 81326.58  | 76851.91  | 64916.34  | 80961.03  | 58844.12  |

|           |           |           |           |           |           |           |           |           |           |
|-----------|-----------|-----------|-----------|-----------|-----------|-----------|-----------|-----------|-----------|
| LP283.190 | LP283.190 | LP283.190 | LP283.190 | LP283.190 | LP283.189 | LP283.190 | LP283.190 | LP283.190 | LP283.190 |
| 54263.14  | 90811.49  | 69739.2   | 82209.24  | 92362.76  | 71336.22  | 60656.59  | 87944.05  | 48558.85  | 102828    |
| 53275.89  | 88565.87  | 68069.33  | 85502.96  | 81694.09  | 71038.2   | 63818.52  | 97546.05  | 47371.94  | 97964.01  |
| 58854.09  | 87927.74  | 76156.46  | 79299.76  | 85643.63  | 63554.2   | 64734.75  | 92325.74  | 49834.49  | 102304.5  |
| 61398.35  | 86708.04  | 69676.41  | 79825.33  | 97504.7   | 68061.65  | 66782.71  | 98640.74  | 46737.5   | 100115.4  |
| 53119.88  | 91459.72  | 71356.88  | 76621.6   | 97399.29  | 71300.75  | 64218.67  | 94641.19  | 51104.92  | 102788.3  |

|           |           |           |           |           |           |           |           |           |           |
|-----------|-----------|-----------|-----------|-----------|-----------|-----------|-----------|-----------|-----------|
| LP283.19_ | LP283.190 | LP283.190 | LP283.19_ | LP283.190 | LP283.190 | LP283.190 | LP283.190 | LP283.189 | LP283.190 |
| 61073.3   | 89824.95  | 67446.36  | 46633.05  | 106719.7  | 71272.77  | 61383.87  | 92291.88  | 98624.74  | 97763.01  |
| 66951.3   | 91213.33  | 69399.52  | 47015.63  | 110881.6  | 63117.32  | 55928.34  | 100882    | 87376.54  | 99678.87  |
| 73459.86  | 91692.85  | 72032.56  | 50724.75  | 112976.3  | 69369.29  | 61032.3   | 94763.31  | 89671.05  | 101565.2  |
| 68956.51  | 96076.33  | 70257.28  | 50399.07  | 114320.5  | 65464.57  | 61678.25  | 97265.6   | 87807.98  | 100607.4  |
| 78235.68  | 98419.82  | 71322.67  | 52491.74  | 117398.3  | 70905.63  | 65070.07  | 96182.53  | 99211.8   | 101243.5  |

|           |           |           |           |           |           |           |           |           |           |
|-----------|-----------|-----------|-----------|-----------|-----------|-----------|-----------|-----------|-----------|
| LP283.190 | LP283.190 | LP283.190 | LP283.190 | LP283.19_ | LP283.19_ | LP283.190 | LP283.226 | LP283.226 | LP283.225 |
| 66394.55  | 67192.24  | 80106.3   | 70226.39  | 83469.7   | 84952.14  | 95388.23  | 62547.33  | 63372.66  | 62123.45  |
| 65195.06  | 65396.93  | 86384     | 68557.42  | 88231.75  | 85791.34  | 98719.33  | 65153.36  | 70020.46  | 61360.71  |
| 71595.67  | 71519.61  | 88598.38  | 65939.1   | 86103.02  | 86730.6   | 96312.32  | 59743.54  | 67455.41  | 57234.78  |
| 64484.14  | 66837.71  | 84866.44  | 64892.24  | 84436.59  | 84074.97  | 89217.79  | 61874.92  | 69453.45  | 61862.92  |
| 68730.49  | 70002.99  | 93850.96  | 69782.32  | 86738.47  | 89893.92  | 94957.14  | 63853.17  | 70159.28  | 57020.5   |

|           |           |           |           |           |           |           |           |           |           |
|-----------|-----------|-----------|-----------|-----------|-----------|-----------|-----------|-----------|-----------|
| LP283.226 | LP283.226 | LP283.225 | LP283.225 | LP283.225 | LP283.226 | LP283.225 | LP283.225 | LP283.225 | LP283.225 |
| 92515.77  | 69595.31  | 72910.62  | 99342.04  | 83047.85  | 54324.85  | 102270.8  | 94881.89  | 80433     | 97663.35  |
| 99034.32  | 66309.74  | 71981.46  | 103360.6  | 81689.09  | 54224.23  | 102910.6  | 106233.5  | 71447.54  | 91432.7   |
| 87638.05  | 76096.57  | 77572.6   | 101801.9  | 86382.64  | 56703.64  | 105604.2  | 101611.6  | 77236.73  | 97606.65  |
| 88762.4   | 70578.24  | 73922.01  | 105542    | 85486.43  | 55666.44  | 106092.1  | 102169.8  | 75163.49  | 96848.85  |
| 85474.25  | 72275.59  | 66025.72  | 98710.16  | 88777.26  | 57151.42  | 104709.6  | 107620.7  | 77169.81  | 99558.47  |

|           |           |           |           |           |           |           |           |           |           |
|-----------|-----------|-----------|-----------|-----------|-----------|-----------|-----------|-----------|-----------|
| LP283.225 | LP283.225 | LP283.225 | LP283.225 | LP283.225 | LP283.226 | LP283.225 | LP283.226 | LP283.226 | LP283.225 |
| 65045.26  | 71846.82  | 101243.7  | 84480.72  | 83231.41  | 90833.17  | 65375.89  | 72314.93  | 75423.94  | 67955.38  |
| 66382.06  | 76026.51  | 94051.39  | 85961.37  | 81386.99  | 87759.58  | 70307.73  | 80447.08  | 70458.99  | 75068.13  |
| 69187.52  | 74266.82  | 93922.87  | 81292.6   | 84779.21  | 88456.76  | 70307.91  | 80866.13  | 77058.63  | 71113.96  |
| 65535.63  | 69398.69  | 98419.45  | 88923.51  | 83274.54  | 91721.53  | 70645.53  | 80721.1   | 66855.1   | 69676.57  |
| 68068.42  | 81280.38  | 93248.81  | 91593.6   | 81873.92  | 89073.9   | 70107.9   | 87626.21  | 73411.66  | 70248.56  |



|           |           |           |           |           |           |           |           |           |           |
|-----------|-----------|-----------|-----------|-----------|-----------|-----------|-----------|-----------|-----------|
| LP283.226 | LP283.226 | LP283.225 | LP283.225 | LP283.225 | LP283.225 | LP283.281 | LP283.282 | LP283.281 | LP283.282 |
| 76502.63  | 98610.86  | 78521.02  | 103701.1  | 69821.04  | 79585.31  | 107406.6  | 124438.2  | 183168.2  | 209560.1  |
| 69552.34  | 101091.7  | 74357.03  | 106881    | 72930.24  | 77473.95  | 117146.4  | 124897.5  | 127732.9  | 224603.2  |
| 68566.35  | 104440.6  | 70639.31  | 105839.8  | 74825.3   | 84612.17  | 177959.1  | 120825.8  | 188418.5  | 232210.7  |
| 80613.91  | 105117.2  | 76578.2   | 102949.7  | 70242.62  | 78262.1   | 168942.9  | 105087.7  | 190235.6  | 246452.5  |
| 72467.04  | 103624.7  | 69177.98  | 121262    | 75211.52  | 83640.22  | 151247.9  | 126206.2  | 192079    | 235778    |

|           |           |           |           |           |           |           |           |           |           |
|-----------|-----------|-----------|-----------|-----------|-----------|-----------|-----------|-----------|-----------|
| LP283.282 | LP283.282 | LP283.282 | LP283.282 | LP283.282 | LP284.266 | LP284.266 | LP284.266 | LP284.294 | LP284.294 |
| 167296.7  | 142983.4  | 132978.5  | 160660.5  | 125706    | 143545.3  | 135233    | 121209.3  | 467672.6  | 139170.5  |
| 160848.8  | 147809.6  | 135160    | 147024.7  | 121197.7  | 134502.1  | 115235.4  | 133404.1  | 472946.1  | 150436.7  |
| 121096.1  | 87806.84  | 127424.1  | 206643.9  | 164390.4  | 38931.58  | 36242.1   | 27531.38  | 576580.1  | 146229.1  |
| 169688    | 157607.6  | 133798.2  | 139771.7  | 185090.9  | 123395.1  | 119036.4  | 128957.9  | 632864.5  | 164691.5  |
| 174129.2  | 163284.5  | 131695.6  | 232275.4  | 192428.7  | 142946.2  | 116737.8  | 115717.4  | 656947.7  | 133179.4  |

|           |           |           |           |           |           |           |           |           |           |
|-----------|-----------|-----------|-----------|-----------|-----------|-----------|-----------|-----------|-----------|
| LP284.294 |
| 301573.1  | 114064.7  | 72792.69  | 138107.2  | 134165.8  | 165426.5  | 149007.6  | 131912.8  | 81797.54  | 132632.1  |
| 321104.6  | 110782.1  | 76308.73  | 135772.7  | 144192.1  | 168531    | 146208.2  | 123131.8  | 79477.58  | 121145.1  |
| 324172.8  | 127012.4  | 93784.9   | 153261.1  | 144280.5  | 168318.9  | 145167.1  | 130562.4  | 79636.98  | 172420.1  |
| 351085.5  | 121156.4  | 115183.9  | 125884    | 147274.7  | 153718.1  | 141844.6  | 119208.5  | 79415.07  | 131900.7  |
| 336082.9  | 137073.7  | 71622.99  | 152790.4  | 143278.3  | 164929    | 157999.9  | 128305.3  | 79508.51  | 118795.6  |

|           |           |           |           |           |           |           |           |           |           |
|-----------|-----------|-----------|-----------|-----------|-----------|-----------|-----------|-----------|-----------|
| LP284.294 | LP284.294 | LP284.294 | LP284.294 | LP284.331 | LP284.331 | LP285.130 | LP285.130 | LP285.130 | LP285.130 |
| 95508.17  | 89128.08  | 86788.53  | 82896.52  | 809415.7  | 317803.3  | 210406.5  | 113009.4  | 189456.1  | 111002.9  |
| 99360.06  | 82257.46  | 82812.13  | 87013.74  | 609268.4  | 329449.4  | 152783.3  | 140629.8  | 161494.2  | 117796.9  |
| 92576.98  | 92759.55  | 80265.4   | 94332.9   | 517099.7  | 370131.4  | 164753.4  | 128249.1  | 158217.5  | 152286.6  |
| 96777.48  | 84183.94  | 81093.85  | 88394.88  | 709877.4  | 407911    | 181006.1  | 126427.5  | 185291.2  | 148802.4  |
| 94826.14  | 99877.99  | 84679.01  | 87916.36  | 689061.1  | 422230.3  | 209140.9  | 181207    | 185981.1  | 153014    |

|           |           |           |           |           |           |           |           |           |           |
|-----------|-----------|-----------|-----------|-----------|-----------|-----------|-----------|-----------|-----------|
| LP285.130 | LP285.130 | LP285.130 | LP285.130 | LP285.131 | LP285.130 | LP285.130 | LP285.131 | LP285.131 | LP285.131 |
| 151113.9  | 137539.4  | 178425.2  | 181018    | 115461.6  | 126673.2  | 157137.9  | 140360    | 124976.6  | 172877.4  |
| 114670.6  | 173291    | 125422.3  | 179867.9  | 133404.1  | 181968.4  | 117239.6  | 229981.4  | 154648.9  | 167881.9  |
| 151352.4  | 185836.5  | 166734.5  | 144126.9  | 127106.9  | 125338.2  | 206068.8  | 154007.3  | 135956.1  | 153573.9  |
| 175489.1  | 130815.7  | 182913.2  | 140286.2  | 107588.3  | 154800.9  | 116507.7  | 183932    | 132992    | 178952.9  |
| 165707.2  | 125805.4  | 175171    | 146385.7  | 124581.8  | 203672.4  | 109328.9  | 201620.9  | 112637.4  | 162975.7  |

|           |           |           |           |           |           |           |           |           |           |
|-----------|-----------|-----------|-----------|-----------|-----------|-----------|-----------|-----------|-----------|
| LP285.130 | LP285.130 | LP285.131 | LP285.131 | LP285.131 | LP285.130 | LP285.131 | LP285.131 | LP285.130 | LP285.130 |
| 150027.5  | 210202    | 215764.2  | 239663.2  | 204444    | 137103.1  | 122920    | 171536.1  | 150324.6  | 144261.5  |
| 145413.7  | 155898.9  | 195517.1  | 208840.7  | 254247.8  | 149359.3  | 120763.3  | 140013.9  | 172279.6  | 169949.5  |
| 154093.7  | 167652.7  | 154846.6  | 116258.8  | 198181.8  | 177666.5  | 119476.5  | 150682.6  | 154331.7  | 191364.3  |
| 134129    | 130673.1  | 196914.1  | 196886    | 193903    | 143845    | 151432.6  | 172907.9  | 140989.7  | 220258.6  |
| 140587.6  | 186393.9  | 127409.9  | 126685.2  | 216832.1  | 148114.6  | 161947.5  | 202225.2  | 160766.4  | 109289.4  |

|           |           |           |           |           |           |           |           |           |           |
|-----------|-----------|-----------|-----------|-----------|-----------|-----------|-----------|-----------|-----------|
| LP285.131 | LP285.130 | LP285.130 | LP285.131 | LP285.131 | LP285.131 | LP285.131 | LP285.130 | LP285.130 | LP285.131 |
| 135412.5  | 173322.2  | 234241.6  | 146518.7  | 108126.6  | 155622    | 127783.2  | 99920.32  | 155531.9  | 178846.6  |
| 169082.8  | 190336.7  | 188054.1  | 130468.5  | 156102.4  | 166845.9  | 126857.1  | 133082.6  | 165527.9  | 177924.3  |
| 155235.3  | 139949.2  | 143598.8  | 127327.2  | 164585.4  | 143564    | 154438.1  | 129866.2  | 164713.4  | 144292    |
| 198005.3  | 127686.4  | 180051.2  | 121357.4  | 130902.9  | 199784.9  | 138439.2  | 242170.5  | 139845.3  | 192906.3  |
| 206875.5  | 137056.3  | 210624.3  | 124235.1  | 141582    | 146476.5  | 177073.5  | 143208.8  | 167181.5  | 186626.7  |

|           |           |           |           |           |           |           |           |           |           |
|-----------|-----------|-----------|-----------|-----------|-----------|-----------|-----------|-----------|-----------|
| LP285.131 | LP285.130 | LP285.131 | LP285.131 | LP285.130 | LP285.131 | LP285.130 | LP285.131 | LP285.131 | LP285.130 |
| 157696    | 109366.7  | 171481.5  | 244234.2  | 182514.6  | 127588.2  | 159490.6  | 149233.7  | 153784.2  | 139636.1  |
| 158622.5  | 94778.95  | 179757.6  | 153464.9  | 201615.6  | 129913.7  | 132879.7  | 131578.1  | 151858.5  | 133627.9  |
| 161611.2  | 112558.1  | 153350.8  | 146367.1  | 210695.2  | 188666.1  | 129251.3  | 154219.7  | 176284.4  | 199986.4  |
| 142924.8  | 87621.04  | 217348.1  | 164131.7  | 185037.2  | 122895.8  | 121901.6  | 154718.1  | 180031.8  | 135930.4  |
| 138772.6  | 96284.31  | 165176.4  | 143013.7  | 206723.3  | 157118.4  | 144109.8  | 135848    | 183871.2  | 154617.3  |



|           |           |           |           |           |           |           |           |           |           |
|-----------|-----------|-----------|-----------|-----------|-----------|-----------|-----------|-----------|-----------|
| LP285.131 | LP285.131 | LP285.131 | LP285.131 | LP285.131 | LP285.131 | LP285.130 | LP285.130 | LP285.131 | LP285.131 |
| 165409.5  | 169122    | 131357    | 169300.9  | 162989.1  | 171113.7  | 138738.7  | 143695.9  | 144484    | 132089.4  |
| 143060    | 191643.9  | 116738.3  | 150522.2  | 235352.4  | 223718.4  | 138759    | 154808.4  | 152424.5  | 154540.7  |
| 165758.9  | 186403.5  | 115992.9  | 139245.1  | 160424.4  | 173616.9  | 133869    | 128574.7  | 162379.8  | 138017.6  |
| 170612.9  | 228608.8  | 143996.7  | 163401.7  | 171851.1  | 186470.5  | 158194.3  | 126475.8  | 142366.2  | 127254.8  |
| 167889.1  | 158670.6  | 97145.27  | 147438.1  | 163208.5  | 163331.5  | 187223.3  | 138214.2  | 171951.3  | 122743.9  |

|           |           |           |           |           |           |           |           |           |           |
|-----------|-----------|-----------|-----------|-----------|-----------|-----------|-----------|-----------|-----------|
| LP285.131 | LP285.130 | LP285.131 | LP285.130 | LP285.131 | LP285.130 | LP285.131 | LP285.131 | LP285.131 | LP285.130 |
| 129373.8  | 125930.9  | 113775.8  | 131391.2  | 250049    | 140830.1  | 118803.8  | 137899.4  | 153733.9  | 135120.7  |
| 130660.9  | 132729.9  | 130070.5  | 135594.3  | 172386.6  | 126066.6  | 130467.9  | 120600.1  | 164577.2  | 124413.1  |
| 126027.1  | 163303.7  | 122747.8  | 120356.8  | 205491.4  | 135368.1  | 133972    | 142498.5  | 139737.3  | 139645    |
| 169270.7  | 146506.5  | 120671.7  | 126420.6  | 179218.6  | 139879.3  | 139321.3  | 137303.8  | 123204.3  | 146415.4  |
| 156875.5  | 144871.6  | 121861.8  | 132908.8  | 145400.2  | 146566.2  | 117176.9  | 127982    | 129203.1  | 154316    |

|           |           |           |           |           |           |           |           |           |           |
|-----------|-----------|-----------|-----------|-----------|-----------|-----------|-----------|-----------|-----------|
| LP285.131 | LP285.131 | LP285.131 | LP285.131 | LP285.131 | LP285.131 | LP285.130 | LP285.131 | LP285.131 | LP285.131 |
| 132428    | 143564.4  | 97747.38  | 72353.67  | 89141.63  | 79513.25  | 78465.37  | 62250.08  | 86345.88  | 66419.6   |
| 127086.1  | 154037.2  | 93371.83  | 82753.4   | 78653.7   | 71213.6   | 77521.49  | 64527.17  | 86420.76  | 68015.89  |
| 125929.5  | 152629.2  | 101597.7  | 65871.05  | 77055.03  | 71231.6   | 73934.14  | 66313.43  | 79219.57  | 59082.3   |
| 123727.3  | 150015    | 92465.78  | 66899.68  | 74288.29  | 74641.87  | 73277.26  | 57981.91  | 90105.85  | 65068.05  |
| 148819    | 161118.8  | 91918.53  | 80092.56  | 80105.68  | 76737.83  | 74889.84  | 61336.68  | 89756.22  | 63507.74  |

|           |           |           |           |           |           |           |           |           |           |
|-----------|-----------|-----------|-----------|-----------|-----------|-----------|-----------|-----------|-----------|
| LP285.131 | LP285.169 |
| 73032.15  | 55716.93  | 48658.11  | 55388.21  | 47810.43  | 67963.35  | 39224.13  | 149103.2  | 42287.56  | 76517.2   |
| 75947.52  | 52050.56  | 52615.82  | 63444.9   | 47771.06  | 70842.98  | 41397.96  | 141671.5  | 48425.29  | 74748.82  |
| 63781.24  | 58591.83  | 54850.54  | 58849.74  | 47268.24  | 76570.83  | 37451.48  | 144257.8  | 44156.22  | 78926.88  |
| 65013.13  | 52571.11  | 50733.66  | 66310.41  | 47068.96  | 74226.84  | 34991.28  | 153544.4  | 44533.75  | 76614.99  |
| 66840.56  | 49610.56  | 52260.6   | 65377.75  | 44794.94  | 72649.43  | 39220.75  | 145346    | 43504.64  | 72490.24  |

|           |           |           |           |           |           |           |           |           |           |
|-----------|-----------|-----------|-----------|-----------|-----------|-----------|-----------|-----------|-----------|
| LP285.169 | LP285.169 | LP285.169 | LP285.169 | LP285.169 | LP285.169 | LP285.242 | LP285.242 | LP285.242 | LP285.278 |
| 51982.47  | 35394.21  | 31360.43  | 47839.21  | 33331.9   | 42499.63  | 152709.6  | 86236.38  | 124361.8  | 47218.45  |
| 52620.92  | 32035.18  | 29775.99  | 48543.36  | 36761.29  | 40497.81  | 165806.7  | 82751.15  | 124073.2  | 50163.95  |
| 50939.38  | 35761     | 27795.19  | 41834.96  | 36488.76  | 45469.37  | 167638.5  | 86501.47  | 127840.1  | 48319.39  |
| 47974.29  | 33938.48  | 26879.09  | 50919.11  | 36343.17  | 40497.57  | 144730.8  | 86329.28  | 121392.7  | 48461.62  |
| 52966.76  | 31729.68  | 31084.64  | 44303.26  | 33553.14  | 40903.45  | 163972.1  | 76934     | 122837.1  | 48834.72  |

|           |           |           |           |           |           |           |           |           |           |           |
|-----------|-----------|-----------|-----------|-----------|-----------|-----------|-----------|-----------|-----------|-----------|
| LP285.278 | LP285.278 | LP285.279 | LP285.278 | LP285.278 | LP285.278 | LP285.278 | LP285.278 | LP285.278 | LP285.298 | LP285.298 |
| 43468.68  | 43594.8   | 15592.31  | 36852.8   | 40367.05  | 40522.9   | 40282.27  | 16684.48  | 36194.27  | 29909.07  |           |
| 43190.36  | 40055.64  | 17374.64  | 41302.92  | 40765.7   | 40717.36  | 40264.25  | 19695.16  | 39729.15  | 28847.36  |           |
| 48978.4   | 40702.54  | 15039.16  | 36355.88  | 38910.13  | 40654.53  | 39074.75  | 19349.69  | 40489.49  | 28848.45  |           |
| 43112.1   | 35364.11  | 14698.43  | 32289.05  | 41839.54  | 33860.48  | 38701.65  | 19139.55  | 37107.12  | 27703.6   |           |
| 38582.45  | 40948.91  | 14954.21  | 34839.04  | 38168.54  | 39033.01  | 41206.39  | 20353.51  | 42004.55  | 26063.91  |           |

|           |           |           |           |           |           |           |           |           |           |
|-----------|-----------|-----------|-----------|-----------|-----------|-----------|-----------|-----------|-----------|
| LP285.334 | LP285.334 | LP286.165 | LP286.164 | LP286.165 | LP286.165 | LP286.245 | LP286.245 | LP286.281 | LP286.310 |
| 146482.5  | 46078.93  | 26743.37  | 32883.7   | 21135.06  | 20967.1   | 23456.15  | 17515.89  | 11485.88  | 37624.44  |
| 109224.2  | 53701.89  | 24927.71  | 34630.81  | 21172.04  | 22449.62  | 25920.14  | 18725.25  | 13951.37  | 31823.37  |
| 93224.21  | 64272.99  | 26608.37  | 34257.36  | 19971.21  | 23426.46  | 26907.34  | 19149.87  | 12944.32  | 34216.88  |
| 78330.28  | 64086.11  | 27519.92  | 35626.27  | 22807.39  | 21068.17  | 26173.42  | 19277.41  | 13242.29  | 31402.26  |
| 90832.11  | 55145.26  | 27999.56  | 34416.26  | 19792.58  | 23129.37  | 27374.19  | 15738.56  | 13747.13  | 33094.22  |

|           |           |           |           |           |           |           |           |           |           |
|-----------|-----------|-----------|-----------|-----------|-----------|-----------|-----------|-----------|-----------|
| LP286.310 | LP286.310 | LP286.338 | LP287.147 | LP287.147 | LP287.147 | LP287.147 | LP287.147 | LP287.148 | LP287.221 |
| 13860.4   | 36893.74  | 11738.7   | 61883.03  | 93195.36  | 50423.83  | 56895.99  | 56110.65  | 61839.29  | 104632.6  |
| 13412.35  | 33061.44  | 8305.692  | 67183.17  | 93939.25  | 57250.58  | 49692.8   | 56561.48  | 68576.38  | 89886.07  |
| 12637.45  | 41247.74  | 9195.252  | 67883.35  | 93053.01  | 48491.52  | 62580.94  | 60759.23  | 60960.96  | 95501.77  |
| 13397.65  | 34819.61  | 10532.97  | 66139.4   | 93513.12  | 48462.94  | 65728.82  | 54560.43  | 63146.18  | 128128.7  |
| 14270.11  | 35333.77  | 11783.72  | 75862.77  | 97795.46  | 66101.6   | 68425.16  | 65910.6   | 70861.16  | 83184.18  |



|           |           |           |           |           |           |           |           |           |           |
|-----------|-----------|-----------|-----------|-----------|-----------|-----------|-----------|-----------|-----------|
| LP287.221 | LP287.222 | LP287.221 | LP287.221 |
| 70070.38  | 54052.01  | 79313.51  | 34721.92  | 55159.73  | 73439.07  | 78254.87  | 74297.69  | 64770.99  | 115901    |
| 66089.95  | 77838.7   | 78672.47  | 38895.52  | 69820.21  | 70549.85  | 77151.09  | 66247.99  | 52405.49  | 109912.7  |
| 61060.91  | 53775.53  | 76697.43  | 55639.64  | 54004.51  | 76125.15  | 85532.85  | 71777.84  | 65196.54  | 116247.6  |
| 62853.13  | 58604.19  | 71838.9   | 36706.01  | 55729.61  | 81102.76  | 72079.7   | 70433.45  | 63285.78  | 112126    |
| 71368.17  | 56590.59  | 71175.71  | 48984.61  | 55817.75  | 85359.37  | 75119.57  | 68221.5   | 57793.17  | 97038.92  |

|           |           |           |           |           |           |           |           |           |           |
|-----------|-----------|-----------|-----------|-----------|-----------|-----------|-----------|-----------|-----------|
| LP287.221 | LP287.221 | LP287.222 | LP287.221 | LP287.222 | LP287.221 | LP287.221 | LP287.222 | LP287.222 | LP287.888 |
| 68901.46  | 62472.62  | 67444.58  | 53927.01  | 73837.45  | 52311.59  | 71979.38  | 50961.57  | 69683.49  | 75136.26  |
| 71151.81  | 48472.02  | 64125.86  | 52479.59  | 67801.35  | 64088.6   | 72085.59  | 45626.24  | 69434.22  | 62946.41  |
| 73246.74  | 60529.79  | 73967.91  | 62240.71  | 68044.83  | 59059.74  | 68069.14  | 44631.41  | 69173.66  | 104224.3  |
| 71496.09  | 57186.08  | 64853.3   | 51851.16  | 69756.14  | 57020.01  | 68790.5   | 48265.65  | 69844.12  | 148441.2  |
| 65814.96  | 58607.39  | 67846.93  | 53085.56  | 71218.36  | 56499.27  | 72597.63  | 48657.49  | 68387.67  | 59741.98  |

|           |           |           |           |           |           |           |           |           |           |
|-----------|-----------|-----------|-----------|-----------|-----------|-----------|-----------|-----------|-----------|
| LP288.180 | LP288.180 | LP288.181 | LP288.180 | LP288.180 | LP288.225 | LP288.253 | LP288.253 | LP288.253 | LP288.253 |
| 43064.8   | 60920.11  | 37531.43  | 47973.42  | 49402.35  | 58639.95  | 121389.4  | 57939.54  | 105437.3  | 89989.96  |
| 39714.32  | 59837.85  | 35118.82  | 46346.3   | 47151.43  | 56317.47  | 119428.3  | 63969.59  | 89936.57  | 96846.25  |
| 38237.58  | 63421.14  | 35032     | 42762.71  | 52827.67  | 51870.23  | 104185.2  | 62914.63  | 132298.7  | 94640.6   |
| 48275.17  | 57815.03  | 40963.94  | 53922.34  | 53601.16  | 55742.2   | 131232.5  | 80051.78  | 124340.2  | 87605.85  |
| 37710.1   | 60615.27  | 39420.17  | 49533.47  | 50303.14  | 49702.34  | 114407.4  | 61566.68  | 101205.3  | 95895.45  |

|           |           |           |           |           |           |           |           |           |           |           |
|-----------|-----------|-----------|-----------|-----------|-----------|-----------|-----------|-----------|-----------|-----------|
| LP288.253 | LP288.921 |
| 59308.11  | 63424.08  | 82709.88  | 45877.94  | 83576.65  | 56493.81  | 46762.81  | 67170.57  | 54670.55  | 216794.2  |           |
| 72915.97  | 54937.21  | 75162.32  | 50560.98  | 88577.21  | 59554.96  | 54865.77  | 67937.4   | 60023.38  | 250341    |           |
| 54674.12  | 55800.75  | 76436.26  | 50566.53  | 106155.5  | 56943.61  | 42382.51  | 66676.08  | 59575.45  | 214568.2  |           |
| 42740.91  | 65455.96  | 82625.38  | 46000.07  | 87836.61  | 54685.78  | 43917.99  | 63761.12  | 63358.88  | 337978.4  |           |
| 50672.38  | 53349.94  | 54115.92  | 44808.13  | 91228.33  | 55105.07  | 41036.08  | 63979.87  | 61414.89  | 283169.5  |           |

|           |           |           |           |           |           |           |           |           |           |
|-----------|-----------|-----------|-----------|-----------|-----------|-----------|-----------|-----------|-----------|
| LP288.921 | LP288.922 |
| 227379.5  | 208077.2  | 154247.3  | 253496.8  | 228447.5  | 286093    | 255586.1  | 69383.65  | 228328.6  | 118706.2  |
| 217579.2  | 213530.3  | 147957.2  | 278630.8  | 241028.4  | 299114.6  | 247645.3  | 77397.43  | 226492.7  | 124727.7  |
| 333661.4  | 165253.2  | 200288.4  | 286334.6  | 238486    | 327578.9  | 280232.1  | 67895.33  | 152033.7  | 99426.45  |
| 268459.3  | 172586.5  | 186228.6  | 229325.3  | 252675.4  | 236625.5  | 270705.8  | 59232.87  | 210646.3  | 153188.4  |
| 195339.8  | 198395.4  | 157731.2  | 281233.1  | 228269.1  | 295120.6  | 273512.2  | 75628.59  | 226018.3  | 112405.7  |

|           |           |           |           |           |           |           |           |           |           |
|-----------|-----------|-----------|-----------|-----------|-----------|-----------|-----------|-----------|-----------|
| LP288.922 | LP288.922 | LP288.922 | LP288.922 | LP288.922 | LP288.921 | LP288.921 | LP288.922 | LP288.922 | LP288.922 |
| 83176.54  | 84764.14  | 99685.34  | 80895.64  | 81138.95  | 229977.2  | 235009.7  | 92438.17  | 85678.36  | 135430.5  |
| 85443.14  | 79721.19  | 103495.9  | 75813.77  | 81053.33  | 242879    | 228432.5  | 88718.6   | 87714.2   | 133091.4  |
| 61938.95  | 89765.45  | 108397.4  | 94539.45  | 70406.18  | 267171.6  | 246824.6  | 80316.61  | 65733.67  | 102694.8  |
| 69782.81  | 74526.52  | 111926.4  | 57734.27  | 74079.85  | 277972    | 232489.1  | 58417.17  | 85446.22  | 127415    |
| 80013.49  | 87640.24  | 96722.54  | 75866.25  | 73830.31  | 228677.8  | 234426.1  | 80953.71  | 78369.07  | 131751.2  |

|           |           |           |           |           |           |           |           |           |           |
|-----------|-----------|-----------|-----------|-----------|-----------|-----------|-----------|-----------|-----------|
| LP288.921 | LP288.922 |
| 247742.6  | 33099.99  | 185136.5  | 195191.9  | 45957.74  | 167633.6  | 72870.41  | 186486.4  | 42639.69  | 40463.81  |
| 216754.3  | 36934.64  | 196719.5  | 200395.3  | 40527.75  | 179199.2  | 72715.62  | 208607.4  | 34687.76  | 37218.51  |
| 256338.7  | 39117.67  | 225578.8  | 177318.4  | 34855.7   | 140017.7  | 71344.32  | 179064.2  | 49890.62  | 41574.72  |
| 249152    | 44242.62  | 203708.4  | 258668.5  | 45777.57  | 196923.1  | 77992.96  | 226341.9  | 48379.58  | 31119.6   |
| 231449.4  | 34774.44  | 189205.5  | 179941.1  | 40052.62  | 197595.1  | 71594.63  | 195317.3  | 31335.7   | 33729.66  |

|           |           |           |           |           |           |           |           |           |           |
|-----------|-----------|-----------|-----------|-----------|-----------|-----------|-----------|-----------|-----------|
| LP288.922 |
| 67227.4   | 233301.2  | 302907.5  | 289085.6  | 226308.1  | 189882    | 40444.28  | 94640.23  | 210659.8  | 77674.96  |
| 73196.27  | 241311.3  | 331576    | 297796.6  | 212079.2  | 200088.3  | 49224.19  | 111423.5  | 225812.3  | 74177.24  |
| 58543.45  | 230930.8  | 242819.9  | 333253.1  | 312675.7  | 197640.5  | 74264.28  | 83217.73  | 165118.4  | 74936.54  |
| 52772.39  | 289537    | 325760.4  | 270108.1  | 244364.8  | 266193.6  | 45934.95  | 138645    | 440561.5  | 78759.04  |
| 67773.07  | 214821.8  | 304732.7  | 281935.3  | 208021.2  | 204653    | 46507.7   | 101504.7  | 207080.8  | 65571.72  |



|           |           |           |           |           |           |           |           |           |           |
|-----------|-----------|-----------|-----------|-----------|-----------|-----------|-----------|-----------|-----------|
| LP288.922 |
| 267220.8  | 218967.5  | 204166.2  | 125427.4  | 188405.7  | 190954    | 194482.5  | 146332.1  | 190966.4  | 76473.24  |
| 261793.2  | 226973.1  | 201541.3  | 117964.4  | 187398.1  | 177378.9  | 188421.1  | 151553    | 174195    | 83412.34  |
| 201995.1  | 219810    | 229010.7  | 189579.6  | 168881.8  | 218857.4  | 274274.8  | 245241.4  | 205297.4  | 68307.08  |
| 193803.2  | 239621.1  | 239504.8  | 137057.5  | 194087.1  | 188956.4  | 204202    | 163647.8  | 151238    | 63814.47  |
| 260833.7  | 248852    | 187438.2  | 133587.5  | 185685.9  | 192299    | 209643.6  | 140193.8  | 183832.2  | 73735.73  |

|           |           |           |           |           |           |           |           |           |           |
|-----------|-----------|-----------|-----------|-----------|-----------|-----------|-----------|-----------|-----------|
| LP288.922 | LP288.921 | LP288.922 |
| 287387.2  | 190827.4  | 99286.78  | 213794.4  | 126846.9  | 63408.33  | 134327.5  | 247382.8  | 213494.1  | 68111.93  |
| 286567.9  | 213679.9  | 102342.6  | 198162    | 158123.4  | 67022.15  | 135937.8  | 251487.3  | 198386.9  | 63422.21  |
| 235662.2  | 233642.8  | 93201.91  | 187869.4  | 188983.4  | 85625.94  | 139094    | 245740.5  | 218783.5  | 71144.6   |
| 267666    | 171695.2  | 62586.59  | 175750.1  | 168441.2  | 62491.87  | 245905.8  | 183943.5  | 260384.9  | 60801.82  |
| 283123.5  | 183334.3  | 92983.72  | 190117.1  | 130187.2  | 62470.43  | 138424.3  | 259777.2  | 201175.7  | 72441.11  |

|           |           |           |           |           |           |           |           |           |           |
|-----------|-----------|-----------|-----------|-----------|-----------|-----------|-----------|-----------|-----------|
| LP288.922 |
| 49926.66  | 238711.6  | 215746.5  | 238630.7  | 233851.4  | 75762.22  | 227336.6  | 328893.1  | 159766.8  | 259470.9  |
| 44123.28  | 247564    | 212034.6  | 213412.4  | 208799    | 84531.48  | 236574.5  | 344638.1  | 167741.4  | 255183.6  |
| 41506.41  | 222181.3  | 176747.2  | 234597.8  | 200144.5  | 63210.19  | 249567.6  | 346061.6  | 154746.6  | 316759.3  |
| 49064     | 219597.1  | 183666.7  | 271045.4  | 308313.5  | 63077.63  | 240501.5  | 292730    | 128893    | 252295.1  |
| 35114.22  | 261954.5  | 189006.1  | 220822.1  | 227094.7  | 75861.11  | 224592.5  | 341074.2  | 147786.1  | 246559.3  |

|           |           |           |           |           |           |           |           |           |           |
|-----------|-----------|-----------|-----------|-----------|-----------|-----------|-----------|-----------|-----------|
| LP288.922 |
| 228638.5  | 108257.8  | 45863.97  | 60256.7   | 42575.68  | 184637    | 171866.3  | 215838.2  | 265955    | 232661.8  |
| 225120    | 115351.3  | 44378.71  | 61810.4   | 47630.77  | 197683.9  | 173774.7  | 201717.1  | 264621    | 209411.8  |
| 258318.7  | 132483    | 54743.35  | 54587.42  | 91230.02  | 264952.8  | 180257.6  | 209554.5  | 230029.7  | 189310    |
| 242844.6  | 112385.6  | 42709.14  | 61868.25  | 32927.67  | 308210.1  | 198517.2  | 190118.1  | 297094.4  | 276105.1  |
| 216019.8  | 100969.5  | 47319.38  | 59612.92  | 40552.5   | 199213.2  | 160832.3  | 204734    | 267339.1  | 224085    |

|           |           |           |           |           |           |           |           |           |           |
|-----------|-----------|-----------|-----------|-----------|-----------|-----------|-----------|-----------|-----------|
| LP288.922 | LP288.922 | LP288.922 | LP289.154 | LP289.164 | LP289.164 | LP289.164 | LP289.164 | LP289.164 | LP290.160 |
| 111256.5  | 65331.22  | 274273.4  | 19521.14  | 40134.87  | 35490.84  | 41882.31  | 38388.05  | 77218.1   | 52909.06  |
| 118511.6  | 68517.83  | 257252.8  | 16187.52  | 34933.57  | 32651.57  | 44552.83  | 31599.51  | 77195.67  | 67336.65  |
| 99350.98  | 64674.43  | 289083.8  | 15289.48  | 36873.23  | 31332.37  | 46468.52  | 36760.52  | 76782.15  | 59687.47  |
| 134122.7  | 53013.7   | 263474    | 10437.88  | 35664.69  | 28995.81  | 43971.69  | 38313.72  | 77986.25  | 78875.49  |
| 100556.6  | 69292.07  | 247932    | 14854.81  | 34890.09  | 31254.42  | 47023.91  | 33600.75  | 65290.61  | 60424.84  |

|           |           |           |           |           |           |           |           |          |          |
|-----------|-----------|-----------|-----------|-----------|-----------|-----------|-----------|----------|----------|
| LP290.159 | LP290.159 | LP290.159 | LP290.159 | LP290.160 | LP290.160 | LP290.160 | LP290.159 | LP290.16 | LP290.16 |
| 77609.64  | 71378.37  | 69295.84  | 53563.23  | 82423.14  | 55868.93  | 67307.03  | 75886.45  | 77501.05 | 59272.87 |
| 69200.26  | 61668.45  | 74019.88  | 67102.32  | 74275.94  | 55494.98  | 67241.16  | 62831.08  | 74432.26 | 55829.76 |
| 69175.82  | 64902.45  | 70513.76  | 71698.84  | 78977.06  | 51160.38  | 63468.13  | 63789.48  | 77279.94 | 53127.62 |
| 73773.13  | 58557.9   | 66826.04  | 55193.81  | 71924.41  | 53730.95  | 74300.75  | 74273.86  | 106388.3 | 59259.23 |
| 86990.78  | 64770.75  | 79039.81  | 63582.65  | 76187.63  | 54858.27  | 65383.66  | 66656.19  | 79793.4  | 58679.68 |

|           |           |           |           |           |           |           |           |           |           |
|-----------|-----------|-----------|-----------|-----------|-----------|-----------|-----------|-----------|-----------|
| LP290.16_ | LP290.160 | LP290.16_ | LP290.160 | LP290.16_ | LP290.16_ | LP290.16_ | LP290.160 | LP290.159 | LP290.160 |
| 85791.02  | 70095.68  | 86116.33  | 64978.68  | 66527.08  | 57594.14  | 56874.05  | 46474.88  | 42638.72  | 77572.16  |
| 84991     | 71958.25  | 83169.86  | 59744.05  | 65471.54  | 56245.57  | 56038.79  | 43908.51  | 42921.22  | 80604.53  |
| 74196.86  | 69547.69  | 87491.99  | 59474.32  | 66783.8   | 59923.56  | 52950.79  | 50920.03  | 44432.21  | 78993.04  |
| 85899.45  | 76088.35  | 93527.89  | 62570.48  | 63352.28  | 55871.26  | 59002.91  | 45420.4   | 44798.69  | 77377.82  |
| 84315.74  | 76319.97  | 91647.64  | 66027.82  | 63092.33  | 53275.68  | 59091.55  | 44989.33  | 43987.47  | 81782.34  |

|           |           |           |           |           |           |           |           |           |           |
|-----------|-----------|-----------|-----------|-----------|-----------|-----------|-----------|-----------|-----------|
| LP290.160 | LP290.159 | LP290.160 | LP290.160 | LP290.16_ | LP290.159 | LP290.160 | LP290.160 | LP290.160 | LP290.16_ |
| 43832.62  | 78125.42  | 42157.18  | 54658.02  | 77503.29  | 53956.04  | 72698.37  | 79637.66  | 65815.3   | 81040.35  |
| 40981.24  | 73172.89  | 41789.8   | 65937.12  | 79136.58  | 56445.26  | 78372.02  | 78090.66  | 61134.87  | 84925.88  |
| 46260.66  | 67774.12  | 42699.02  | 70037.52  | 83345.85  | 47711.22  | 78237.82  | 92295.16  | 55148.53  | 84228.93  |
| 45378.07  | 68332.28  | 40213.29  | 64937.19  | 74690.4   | 49487.48  | 75160.97  | 77302.81  | 64735.81  | 85087.77  |
| 46424.21  | 67363.93  | 45720.24  | 67497.23  | 71079.43  | 46814.91  | 78786.27  | 76952.73  | 67122.99  | 80965.83  |



|           |           |           |           |           |           |           |           |           |           |
|-----------|-----------|-----------|-----------|-----------|-----------|-----------|-----------|-----------|-----------|
| LP290.16_ | LP290.160 | LP290.159 | LP290.160 | LP290.159 | LP290.16_ | LP290.160 | LP290.159 | LP290.160 | LP290.16_ |
| 72895.6   | 40232.56  | 86662.64  | 56421.66  | 74789.6   | 86092.23  | 75304.13  | 74982.41  | 66548.17  | 80925.22  |
| 68648.58  | 44501.61  | 88457.23  | 59056     | 69372.34  | 85406.33  | 69920.39  | 65684.11  | 64070.88  | 83052.07  |
| 76251.89  | 43170.79  | 85553.34  | 51287.43  | 71547.47  | 85186.63  | 78575.63  | 71276.12  | 64739.35  | 80530.07  |
| 73595.1   | 43394.69  | 91887.45  | 50930.44  | 69894.14  | 89177.67  | 71081.15  | 70017.76  | 66104.99  | 78564.67  |
| 72926.26  | 42147.7   | 91185.16  | 57543.65  | 72816.25  | 84519.36  | 76250.76  | 68641.72  | 69223.44  | 79568.87  |

|           |           |           |           |           |           |           |           |           |           |
|-----------|-----------|-----------|-----------|-----------|-----------|-----------|-----------|-----------|-----------|
| LP290.159 | LP290.159 | LP290.160 | LP290.159 | LP290.159 | LP290.160 | LP290.160 | LP290.16_ | LP290.159 | LP290.160 |
| 91796.54  | 105066    | 71347.44  | 87560.7   | 112656.8  | 72281.43  | 75366.32  | 50254.61  | 45079.48  | 102618.3  |
| 93056.77  | 113039.2  | 70767.81  | 91770.32  | 109405.1  | 78274.35  | 71265.3   | 50511.01  | 44738.11  | 102678    |
| 93611.45  | 98886.62  | 66113.99  | 92269.06  | 108392.5  | 77605.81  | 77374.54  | 50651.57  | 37537.46  | 104039.9  |
| 90304.21  | 100597    | 73966.45  | 87989.38  | 114661.3  | 76994.32  | 78378.03  | 50741.84  | 38956.19  | 99740.69  |
| 91357.87  | 116341.2  | 71791.01  | 85233.79  | 109729.7  | 76617.49  | 75914.77  | 50731.49  | 39564.44  | 97655.51  |

|           |           |           |           |           |           |           |           |           |           |
|-----------|-----------|-----------|-----------|-----------|-----------|-----------|-----------|-----------|-----------|
| LP290.16_ | LP290.160 | LP290.16_ | LP290.16_ | LP290.159 | LP290.196 | LP290.269 | LP290.269 | LP290.269 | LP290.269 |
| 44876.51  | 71038.93  | 51332.37  | 67838.15  | 76681.85  | 50066.54  | 81699.68  | 101142.5  | 77717.97  | 83620.22  |
| 42762.61  | 71312.09  | 52458.26  | 68195.23  | 74896.9   | 49661.65  | 78678.59  | 105279.5  | 73584.89  | 81446.87  |
| 45731.12  | 70897.83  | 53897.39  | 64419.79  | 73742.88  | 52736.73  | 102548.1  | 131702    | 78913.26  | 79210.45  |
| 44077.76  | 61787.33  | 53018.06  | 64004.2   | 69977.67  | 47587.73  | 90917.24  | 96541.2   | 100449.9  | 132257.3  |
| 48613.24  | 67323.7   | 53597     | 63811.56  | 74765.39  | 47618.12  | 70032.49  | 90054.06  | 67031.4   | 78636.95  |

|           |           |           |           |           |           |           |           |           |           |
|-----------|-----------|-----------|-----------|-----------|-----------|-----------|-----------|-----------|-----------|
| LP290.268 | LP290.269 | LP290.269 | LP290.269 | LP290.269 | LP290.269 | LP290.268 | LP290.269 | LP290.269 | LP290.269 |
| 94717.13  | 97910.28  | 80723.24  | 87912.48  | 74262.97  | 89810.6   | 68299.01  | 97407.58  | 96782.13  | 58252.08  |
| 86122.72  | 89172.3   | 67363.35  | 93523.21  | 80807.18  | 94824.89  | 58948.08  | 84595.13  | 96567.25  | 56772.3   |
| 124761.7  | 75442.58  | 100010.8  | 114690.3  | 106906.6  | 76293.23  | 75497.12  | 104637.6  | 102789.2  | 56531.03  |
| 127758.6  | 101270.5  | 82761.72  | 64159.99  | 85343.14  | 90352.5   | 68257.29  | 96510.24  | 92173.43  | 63066.96  |
| 77848.98  | 91854.1   | 72255.23  | 91283.97  | 75028.34  | 89704.83  | 52427.3   | 98294.87  | 92531.47  | 51436.61  |

|           |           |           |           |           |           |           |           |           |           |
|-----------|-----------|-----------|-----------|-----------|-----------|-----------|-----------|-----------|-----------|
| LP290.268 | LP290.269 | LP290.269 | LP290.269 | LP290.269 | LP290.269 | LP290.269 | LP290.268 | LP290.269 | LP290.269 |
| 58507.16  | 49820.68  | 44200.73  | 63126.22  | 32801.71  | 55047.95  | 68974.7   | 63352.63  | 40915.93  | 44793.76  |
| 60693.36  | 46166.99  | 49809.57  | 71404.46  | 33835.07  | 52304.08  | 62166.8   | 57378.65  | 47664.33  | 45427.06  |
| 66695.99  | 46556.72  | 54235.23  | 76128.91  | 40501.55  | 59126.36  | 54707.22  | 59660.86  | 46184.03  | 45437.79  |
| 58431.49  | 49327.29  | 42634.61  | 65135.19  | 31888.47  | 53486.25  | 61227.75  | 55571.02  | 38590.62  | 50250.2   |
| 61226.61  | 46539.54  | 45819.29  | 65805.03  | 32693.37  | 53803.05  | 66144.68  | 50884.79  | 43464.71  | 40971.03  |

|           |           |           |           |           |           |           |           |           |           |
|-----------|-----------|-----------|-----------|-----------|-----------|-----------|-----------|-----------|-----------|
| LP290.269 | LP290.269 | LP290.269 | LP290.268 | LP290.268 | LP290.269 | LP290.269 | LP290.268 | LP290.269 | LP290.269 |
| 39373.68  | 44444.08  | 56755.4   | 56589.49  | 37190.83  | 39984.61  | 59575.48  | 45131.73  | 17764     | 49741.48  |
| 37642.5   | 45502.1   | 56438.23  | 55962.02  | 36389.77  | 39792.66  | 59149.2   | 36834.84  | 18082.83  | 45179.53  |
| 36198.75  | 57035.01  | 59190.19  | 60274.26  | 43743.83  | 49606.12  | 66585.31  | 43508.5   | 23431.35  | 41056.25  |
| 37069.47  | 41002.77  | 53480.57  | 49797.78  | 35014.46  | 37941.81  | 51139.58  | 42341.11  | 16071.73  | 45442.28  |
| 32125.05  | 38091.63  | 53615.11  | 57989.5   | 36787.25  | 36059.59  | 55415.79  | 37864.59  | 15925.34  | 46409.02  |

|           |           |           |           |           |           |           |           |           |           |
|-----------|-----------|-----------|-----------|-----------|-----------|-----------|-----------|-----------|-----------|
| LP290.269 | LP290.268 | LP290.269 |
| 34118.7   | 35536.8   | 32623.41  | 39910.78  | 65332.27  | 41631.95  | 46446.77  | 28221.64  | 50315.42  | 76365.83  |
| 37002.83  | 38375.78  | 33309.83  | 45886.23  | 65425.87  | 46326.53  | 55216.56  | 25864.13  | 52916.26  | 65248.39  |
| 43950.35  | 35640.18  | 26904.05  | 42186.01  | 56913.87  | 50486.7   | 64294.22  | 25839.81  | 54480.99  | 83268.46  |
| 31454.19  | 36161.07  | 26964.37  | 43408.34  | 68053.4   | 44729.45  | 48091.03  | 22755.2   | 44698.28  | 66742.76  |
| 36222.72  | 36190.9   | 30568.59  | 46771.83  | 67153.4   | 46432.85  | 46513.45  | 24815.4   | 48082.65  | 69068.92  |

|           |           |           |           |           |           |           |           |           |           |
|-----------|-----------|-----------|-----------|-----------|-----------|-----------|-----------|-----------|-----------|
| LP290.269 | LP290.268 |
| 42936.55  | 82263.72  | 20859.14  | 25975.2   | 61295.7   | 55689.35  | 27972.65  | 37381.24  | 82279.66  | 53371.88  |
| 44328.46  | 71688.78  | 21814.44  | 24789.82  | 58829.37  | 53589.27  | 30716.76  | 40533.03  | 81528.55  | 48857.18  |
| 42540.44  | 73918.98  | 20512.62  | 24028.04  | 65712.93  | 59693.21  | 25881.19  | 41450.84  | 103745.3  | 47520.63  |
| 39755.01  | 69882.7   | 22004.89  | 24046.73  | 56553.8   | 60200.98  | 24399.53  | 38235.01  | 78458.8   | 59188.19  |
| 37920.92  | 65506.06  | 21050.71  | 24194.56  | 54896.13  | 53223.5   | 28654.32  | 41663.88  | 85560.43  | 48686.43  |



|           |           |           |           |           |           |           |           |           |           |
|-----------|-----------|-----------|-----------|-----------|-----------|-----------|-----------|-----------|-----------|
| LP290.269 |
| 18493.9   | 56494.83  | 51472.88  | 84203.5   | 21987.18  | 40580.71  | 17734.47  | 68676.58  | 47239.51  | 74799.6   |
| 18801.71  | 61914.6   | 52847.63  | 77794.56  | 22302.78  | 42448.64  | 16584.35  | 63526.44  | 47984.29  | 69693.61  |
| 23760.42  | 57867.15  | 67159.61  | 98029.06  | 23706.72  | 50776.31  | 18190.81  | 66870.06  | 64885.88  | 66837.49  |
| 19279.74  | 64239.05  | 53268.91  | 76434.32  | 19144.76  | 36647.74  | 17285.04  | 63627.12  | 44404.96  | 70741.83  |
| 19544.69  | 60891.83  | 48674.96  | 75245.83  | 16614.48  | 33206.97  | 15623.55  | 69183.47  | 45364.56  | 70607.1   |

|           |           |           |           |           |           |           |           |           |           |
|-----------|-----------|-----------|-----------|-----------|-----------|-----------|-----------|-----------|-----------|
| LP290.269 | LP290.268 | LP290.269 | LP290.268 |
| 39453.79  | 36641.57  | 70890.66  | 22547.53  | 26760.78  | 72099.76  | 52021.31  | 54004.27  | 48086.85  | 28379.71  |
| 40955.02  | 32022.4   | 70415.66  | 19484.42  | 27133.8   | 69981.77  | 56118.92  | 44408.52  | 45141.29  | 27470.76  |
| 47512.25  | 41897.29  | 65105.71  | 19527.08  | 33439.68  | 82178.27  | 60462.28  | 60622.24  | 44075.5   | 30485.39  |
| 38459.65  | 33982.74  | 59633.41  | 21231.58  | 25621.38  | 64485.14  | 52452.19  | 47965.65  | 43055.99  | 27397.79  |
| 33889.6   | 34492.12  | 61943.55  | 20279.72  | 27586.94  | 68396.72  | 51566.4   | 43643.28  | 43693.34  | 25503.09  |

|           |           |           |           |           |           |           |           |           |           |
|-----------|-----------|-----------|-----------|-----------|-----------|-----------|-----------|-----------|-----------|
| LP290.269 | LP290.269 | LP290.269 | LP290.268 | LP290.269 | LP290.269 | LP290.269 | LP290.269 | LP290.269 | LP290.269 |
| 43277.28  | 23625.91  | 46710.78  | 39244.45  | 32330.73  | 25368.1   | 85498.74  | 30850.96  | 61739.61  | 42874.52  |
| 49645.36  | 23352.65  | 43098.61  | 39602.58  | 35278.98  | 19583.66  | 82137     | 29750.42  | 69714.08  | 46983.67  |
| 49771.68  | 25321.92  | 49865.42  | 49792.09  | 40641.45  | 30220.32  | 106124.4  | 36001.85  | 83373.8   | 55395.64  |
| 49492.15  | 23739.43  | 42830.77  | 37059.36  | 32219.42  | 21595.6   | 85144.6   | 27423.35  | 64513.27  | 46696.04  |
| 44455.36  | 26656.86  | 39783.18  | 46242.17  | 30261.97  | 21275.29  | 85312.4   | 27957.2   | 55023.77  | 43130.77  |

|           |           |           |           |           |           |           |           |           |           |
|-----------|-----------|-----------|-----------|-----------|-----------|-----------|-----------|-----------|-----------|
| LP291.195 | LP291.195 | LP291.231 | LP291.253 | LP292.175 | LP292.175 | LP292.175 | LP292.175 | LP292.261 | LP292.284 |
| 29104.55  | 37083.93  | 34151.61  | 72420.87  | 67211.53  | 38647.92  | 31062.85  | 69339.14  | 9368.622  | 25329.67  |
| 26648.27  | 34125.9   | 32978.6   | 65561.05  | 63172.7   | 36022.04  | 30399.94  | 63390.92  | 11320.63  | 20529.72  |
| 24243.41  | 34282.74  | 33806.01  | 68046.09  | 72510.86  | 33431.18  | 30009.8   | 64173.8   | 13579.48  | 24611.1   |
| 26937.84  | 36433.37  | 34142.27  | 64351.42  | 70326.53  | 32381.46  | 34834.01  | 65458.7   | 5812.688  | 21866.07  |
| 29809.3   | 37332.02  | 36802.02  | 62854.03  | 72992.1   | 32325.57  | 31767.98  | 67412.97  | 12142.44  | 24052.4   |

|           |           |           |           |           |           |           |           |           |           |
|-----------|-----------|-----------|-----------|-----------|-----------|-----------|-----------|-----------|-----------|
| LP292.284 | LP293.174 |
| 13137.84  | 75733.74  | 78391.69  | 43870.33  | 74141.07  | 57648.93  | 51048.49  | 75772.27  | 50347.94  | 61652.43  |
| 12213.54  | 72415.06  | 77922.04  | 48358.7   | 68841.76  | 66343.2   | 49167.38  | 70046.17  | 54354.94  | 67689.09  |
| 15573.82  | 69228.26  | 76107.22  | 47609.15  | 69139.96  | 67161.42  | 54690.78  | 67711.88  | 47171.97  | 57705.25  |
| 11611.44  | 75668.48  | 67176.85  | 46741.02  | 93141.2   | 62676.66  | 51185.61  | 74060.69  | 50191.14  | 63227.77  |
| 10604.28  | 70493.41  | 74081.03  | 39468.74  | 61793.7   | 68362.31  | 54814.73  | 72104.23  | 51679.06  | 58374.77  |

|           |           |           |           |           |           |           |           |           |           |
|-----------|-----------|-----------|-----------|-----------|-----------|-----------|-----------|-----------|-----------|
| LP293.174 |
| 36807.95  | 67382.42  | 44993.11  | 51457.5   | 56208.86  | 79977.32  | 47245.68  | 55926.82  | 58179.28  | 56525.62  |
| 41601.42  | 66615.45  | 43288.81  | 48331.63  | 54721.7   | 80328.2   | 40618.84  | 60911.43  | 62629.36  | 52463.03  |
| 44496.95  | 57488.67  | 44376.14  | 48117.52  | 54788.19  | 74256.11  | 40821.44  | 63289.67  | 57845.1   | 53464.67  |
| 46512.23  | 68609.39  | 45150.45  | 55429.93  | 62965.8   | 83260.68  | 47107.77  | 67066.04  | 52956.56  | 51660.5   |
| 39812.12  | 60708.13  | 47309.55  | 55453.44  | 55931.6   | 79316.75  | 38423.86  | 60169.11  | 61754.31  | 53001.15  |

|           |           |           |           |          |           |           |           |           |           |
|-----------|-----------|-----------|-----------|----------|-----------|-----------|-----------|-----------|-----------|
| LP293.174 | LP293.210 | LP293.210 | LP293.210 | LP293.21 | LP293.210 | LP293.210 | LP293.247 | LP293.247 | LP293.247 |
| 59158.97  | 64169.33  | 83284.1   | 74455.13  | 51103.45 | 59678.67  | 63982.16  | 89683.92  | 42483.27  | 52431.66  |
| 58789.13  | 68297.45  | 72494     | 63217.02  | 45365.93 | 58007.78  | 68391.22  | 87638.1   | 37366.72  | 56582.55  |
| 61726.78  | 57726.98  | 83416.63  | 83642.87  | 50207.85 | 57791.76  | 64052.55  | 70349.24  | 26879.31  | 38868.53  |
| 57146.53  | 61958.79  | 78999.5   | 76422.1   | 55833.26 | 53441.64  | 65074.93  | 46216.76  | 43931.32  | 52345.41  |
| 57952.31  | 67612.14  | 76951.79  | 77140.26  | 53235.78 | 51468.72  | 63927.89  | 92399.03  | 42517.44  | 56720.33  |

|           |           |           |           |           |           |           |           |           |           |
|-----------|-----------|-----------|-----------|-----------|-----------|-----------|-----------|-----------|-----------|
| LP293.283 | LP294.206 | LP294.209 | LP294.208 | LP294.209 | LP294.208 | LP294.209 | LP294.209 | LP294.21_ | LP294.209 |
| 40080.83  | 208973.3  | 90895.2   | 46891.58  | 130131.8  | 55005.88  | 69256.99  | 93029.33  | 88083.54  | 78185.09  |
| 38934.04  | 194438    | 91254.6   | 52508.7   | 122315.5  | 50990.64  | 59714.82  | 94340.04  | 95470.09  | 83721.16  |
| 40623.88  | 194141.2  | 117976.1  | 52415.61  | 120436.7  | 51590.01  | 65896.04  | 120446.8  | 94457.93  | 81038.49  |
| 29453.35  | 176891.1  | 89695.76  | 51532.13  | 123555.3  | 43736.28  | 62600.81  | 94170.13  | 99776.38  | 73186.81  |
| 35509.59  | 181564.2  | 91953.02  | 40858.05  | 114227.1  | 42489.51  | 62559.96  | 86566.53  | 101102.7  | 82706.15  |



|           |           |           |           |           |           |           |           |           |           |
|-----------|-----------|-----------|-----------|-----------|-----------|-----------|-----------|-----------|-----------|
| LP294.208 | LP294.208 | LP294.209 | LP294.210 | LP294.209 | LP294.208 | LP294.209 | LP294.209 | LP295.151 | LP295.151 |
| 53427.37  | 52906.44  | 95667.99  | 64866.61  | 36165.74  | 49936.28  | 37389.57  | 61177.29  | 64198.65  | 119342.1  |
| 54115.24  | 45342.83  | 86013.94  | 57376.54  | 34546.92  | 52246.42  | 35726     | 57225.09  | 60280.13  | 110203.4  |
| 55697.49  | 47266.22  | 86946.81  | 62403.41  | 35768.24  | 49523.45  | 37874.25  | 60199.94  | 65312.41  | 88606.53  |
| 52999.54  | 52352.53  | 96912.18  | 67423.97  | 38720.59  | 50472.76  | 35632.9   | 62274.65  | 81026.66  | 110327.1  |
| 37747.14  | 45957.67  | 93613.49  | 65698.92  | 45521.78  | 41765.5   | 36511.46  | 57607.52  | 76993.71  | 81661.87  |

|           |           |           |           |           |           |           |           |           |           |
|-----------|-----------|-----------|-----------|-----------|-----------|-----------|-----------|-----------|-----------|
| LP295.151 | LP295.151 | LP295.152 | LP295.152 | LP295.151 | LP295.152 | LP295.151 | LP295.152 | LP295.151 | LP295.152 |
| 98489.73  | 138890    | 88753.21  | 78419.55  | 67904.85  | 90268.64  | 91015.75  | 73039.5   | 87765.17  | 77354.27  |
| 100345.9  | 74324.41  | 61569.41  | 71099.4   | 83220.19  | 132711.2  | 109245.2  | 91942.08  | 84269.14  | 85373.65  |
| 105190.3  | 88972.02  | 72564.1   | 76630.43  | 111243    | 68420.4   | 86177.72  | 88906.59  | 92548.05  | 126096.1  |
| 101932.6  | 63628.78  | 67315.15  | 75509.21  | 69131.96  | 85034.01  | 80320.16  | 87180.01  | 103457.6  | 82056.13  |
| 69781.81  | 64966.39  | 70875.21  | 75130.54  | 96672.42  | 76159.68  | 56060.88  | 76700.72  | 64483.05  | 77677.04  |

|           |           |           |           |           |           |           |           |           |           |
|-----------|-----------|-----------|-----------|-----------|-----------|-----------|-----------|-----------|-----------|
| LP295.152 | LP295.151 | LP295.151 | LP295.152 | LP295.152 | LP295.152 | LP295.152 | LP295.151 | LP295.152 | LP295.151 |
| 63588.73  | 67378.16  | 78071.38  | 102708    | 88489.75  | 61976.63  | 88846.17  | 94984.82  | 85663.31  | 105343    |
| 110380.2  | 66078.3   | 105904.3  | 74741.2   | 94945.69  | 118593.9  | 90583.25  | 82467.38  | 93021.15  | 91760.06  |
| 106039.5  | 68432.57  | 85816.41  | 77545.3   | 90594.08  | 79824.5   | 87034.92  | 94399.19  | 87658.2   | 107155.4  |
| 106525.9  | 65693.67  | 83592.32  | 79840.89  | 79649.3   | 120668.4  | 91159.61  | 89819.94  | 90820.92  | 103558.1  |
| 96994.98  | 62163.9   | 77837.96  | 73506.82  | 113526.5  | 78092.63  | 85500.41  | 62399.69  | 93948.5   | 105779.4  |

|           |           |           |           |           |           |           |           |           |           |
|-----------|-----------|-----------|-----------|-----------|-----------|-----------|-----------|-----------|-----------|
| LP295.152 | LP295.151 | LP295.152 | LP295.151 | LP295.151 | LP295.152 | LP295.152 | LP295.152 | LP295.152 | LP295.152 |
| 83367.05  | 98005.51  | 87110.82  | 79791.8   | 85382.79  | 70029.54  | 67909.94  | 64558.12  | 81014.56  | 94589.25  |
| 59733.48  | 66474.39  | 112980    | 70017.9   | 79644.49  | 64649.47  | 77906.97  | 98423.04  | 67660.53  | 83262.5   |
| 81720.32  | 83183.26  | 101876    | 140304.8  | 75110.23  | 66053.51  | 85462.45  | 96507.02  | 70874.87  | 106086.5  |
| 83111.11  | 83982.93  | 95091.46  | 83915.53  | 130837.1  | 62847.05  | 80411.93  | 95590.6   | 75820.47  | 109363.4  |
| 78197.72  | 77027.13  | 98798.56  | 78824.35  | 62330.61  | 71982.08  | 77845.91  | 65999.18  | 65790.34  | 81412.46  |

|           |           |           |           |           |           |           |           |           |           |
|-----------|-----------|-----------|-----------|-----------|-----------|-----------|-----------|-----------|-----------|
| LP295.152 | LP295.152 | LP295.152 | LP295.152 | LP295.151 | LP295.152 | LP295.152 | LP295.152 | LP295.152 | LP295.151 |
| 76904.03  | 72783.09  | 82228.55  | 89717.68  | 95262.8   | 91606.4   | 68366.15  | 76036.84  | 86955.1   | 137963.3  |
| 74544.94  | 84122.51  | 79573.24  | 93651.2   | 104096.7  | 96274.27  | 89873.07  | 78447.71  | 80233.62  | 106861.9  |
| 74969.83  | 76262.34  | 87432.11  | 89248.32  | 115319.2  | 76507.84  | 86047.65  | 72606.68  | 77274.41  | 115226.2  |
| 76320.51  | 74178.75  | 88965.51  | 97766.76  | 122183.5  | 96999.91  | 77640.36  | 73858.8   | 77957.1   | 107752    |
| 75855.89  | 85155.45  | 76677.74  | 84257.31  | 74435.81  | 99925.16  | 70755.67  | 74512.25  | 76815.05  | 105597    |

|           |           |           |           |           |           |           |           |           |           |
|-----------|-----------|-----------|-----------|-----------|-----------|-----------|-----------|-----------|-----------|
| LP295.152 | LP295.151 | LP295.151 | LP295.152 |
| 92984.67  | 69759.81  | 100627.9  | 67498.29  | 56247.18  | 88030.67  | 109751.4  | 69787.33  | 54971.97  | 93472.4   |
| 89903.97  | 78494.23  | 99690.65  | 75030     | 93616.43  | 106148.8  | 101933.4  | 77262.79  | 52602.91  | 80793.79  |
| 89190.55  | 77885.8   | 96708.65  | 69635.21  | 97901.48  | 64101.27  | 110623.6  | 91236.45  | 66039.91  | 117776.2  |
| 85325.04  | 105186.8  | 92711.11  | 72861.77  | 95792.13  | 88556.26  | 107416    | 94988.36  | 61056.6   | 85370.8   |
| 127688.6  | 61142.33  | 97323.04  | 67792.64  | 76998.6   | 89445.19  | 90796.82  | 76435.13  | 57178.37  | 75546.21  |

|           |           |           |           |           |           |           |           |           |           |
|-----------|-----------|-----------|-----------|-----------|-----------|-----------|-----------|-----------|-----------|
| LP295.151 | LP295.152 | LP295.152 | LP295.152 | LP295.152 | LP295.151 | LP295.152 | LP295.152 | LP295.152 | LP295.152 |
| 67269.76  | 87340.15  | 63584.28  | 59795.44  | 116729    | 72290.94  | 89652.14  | 74649.48  | 75183.69  | 91635.57  |
| 66847.87  | 75129.06  | 82247.2   | 78980.27  | 68535.25  | 71347.59  | 83290.16  | 76327.65  | 88234.7   | 91381.26  |
| 78922.17  | 79161.16  | 84793.06  | 81077.96  | 68738.25  | 74641.01  | 89926.77  | 80070.73  | 88429.23  | 93118.96  |
| 76924.85  | 89215.5   | 88389.62  | 84731.05  | 60390.89  | 74109.1   | 81339.8   | 79599.68  | 89432.65  | 68135.91  |
| 74190.88  | 92305.93  | 84753.03  | 72978.28  | 86413.89  | 70811.67  | 91655.92  | 72727.49  | 82613.61  | 93351.86  |

|           |           |           |           |           |           |           |           |           |           |
|-----------|-----------|-----------|-----------|-----------|-----------|-----------|-----------|-----------|-----------|
| LP295.151 | LP295.152 | LP295.151 | LP295.152 | LP295.151 | LP295.152 | LP295.151 | LP295.151 | LP295.152 | LP295.151 |
| 66539.86  | 93971.91  | 55147.43  | 51530.54  | 61145.73  | 60785.03  | 80596.94  | 60085.72  | 59850.42  | 71080.52  |
| 77370.53  | 82014.96  | 58764.95  | 53205.82  | 75503.77  | 63999.47  | 75352.3   | 63102.65  | 60795.1   | 67364.78  |
| 91817.99  | 78477.48  | 79266.35  | 59655     | 74109.94  | 61308.15  | 90484.23  | 67389.63  | 78601.29  | 73878.94  |
| 126779.5  | 64841.98  | 65964.15  | 62708.35  | 74311.53  | 66566.66  | 87076.47  | 71783.35  | 72015.69  | 72506.98  |
| 69809.75  | 85042.8   | 52887.97  | 50311.03  | 62074.75  | 51848.32  | 57835.1   | 57017.72  | 64040.4   | 67405.85  |



|           |           |           |           |           |           |           |           |           |           |
|-----------|-----------|-----------|-----------|-----------|-----------|-----------|-----------|-----------|-----------|
| LP295.152 | LP295.152 | LP295.152 | LP295.152 | LP295.152 | LP295.190 | LP295.190 | LP295.190 | LP295.190 | LP295.190 |
| 62491.08  | 108505.4  | 80111.37  | 85803.9   | 136806.6  | 97158.65  | 115328.1  | 111946.3  | 73577.8   | 114658.5  |
| 89696.95  | 63929.85  | 91533.51  | 85324.62  | 144986.8  | 97509.5   | 111835.3  | 110445.7  | 63932.83  | 98715.04  |
| 108780.6  | 102669.2  | 90779.93  | 95177.68  | 138822.4  | 82785.24  | 123586.4  | 89281.04  | 78406.65  | 148398.3  |
| 60810.56  | 107877.8  | 69118.3   | 85071.23  | 139012    | 87506.71  | 121546    | 103563    | 65282.41  | 91303.26  |
| 60170.81  | 61500.15  | 77719.75  | 96814.18  | 144675    | 98587.02  | 124879.2  | 98155.52  | 71074.63  | 98619.54  |

|           |           |           |           |          |           |           |           |           |           |
|-----------|-----------|-----------|-----------|----------|-----------|-----------|-----------|-----------|-----------|
| LP295.190 | LP295.190 | LP295.191 | LP295.189 | LP295.19 | LP295.189 | LP295.190 | LP295.189 | LP295.190 | LP295.189 |
| 76430.91  | 110257    | 85436.21  | 102786    | 81760.69 | 59616.47  | 89819.82  | 71636.1   | 99624.65  | 90368.47  |
| 93246.5   | 114338.7  | 83364.9   | 102116.5  | 80539.09 | 58261.92  | 90374.08  | 74095.85  | 96425.27  | 78340.22  |
| 109213.9  | 140412    | 90919.6   | 107607.4  | 84813.18 | 65065.22  | 87609.72  | 70933.03  | 98292.51  | 100078.4  |
| 72001.41  | 105029.2  | 87030.79  | 96890.02  | 74971.05 | 56945.52  | 83531.14  | 65415.73  | 95636.86  | 94345.02  |
| 74815.98  | 128038.2  | 75961.22  | 105928    | 77625.73 | 69203.83  | 93197.16  | 66648.68  | 93780.38  | 83339.95  |

|           |           |           |           |           |           |           |           |           |           |
|-----------|-----------|-----------|-----------|-----------|-----------|-----------|-----------|-----------|-----------|
| LP295.190 | LP295.190 | LP295.190 | LP295.190 | LP295.19_ | LP295.19_ | LP295.190 | LP295.209 | LP295.226 | LP295.226 |
| 65213.76  | 104977.7  | 85896.95  | 82986     | 85622.25  | 60598.33  | 56809.88  | 35584.05  | 129587.4  | 96021.67  |
| 74342.68  | 109648.2  | 86378.23  | 84237.17  | 90543.08  | 70310.49  | 62337.68  | 33444.21  | 125411    | 114318.3  |
| 77185.93  | 105336.1  | 86332.01  | 87446.78  | 78343.75  | 71662.57  | 66999.9   | 37889.95  | 137708.4  | 108504.7  |
| 67181.04  | 108825.6  | 83621.74  | 83134.57  | 74690.95  | 59990.8   | 60395.25  | 34040.61  | 73415.11  | 100340.3  |
| 74014.73  | 101331.3  | 88648.21  | 88186.33  | 84255.38  | 65125.86  | 62914.54  | 40116.56  | 128456.4  | 101001.6  |

|           |           |           |           |           |           |           |           |           |           |
|-----------|-----------|-----------|-----------|-----------|-----------|-----------|-----------|-----------|-----------|
| LP295.226 | LP295.226 | LP295.226 | LP295.226 | LP295.227 | LP295.226 | LP295.226 | LP295.227 | LP295.226 | LP295.227 |
| 89111.78  | 75031.11  | 69228.32  | 81167.06  | 81221.08  | 89750.87  | 72105.79  | 86881.21  | 102227.4  | 109565.2  |
| 89084.34  | 80438.54  | 62219.59  | 82207.36  | 86919.54  | 82624.81  | 70230.31  | 79967.76  | 101315.5  | 106316    |
| 84389.74  | 78010.68  | 54720.04  | 72540.65  | 87596.21  | 74877.06  | 73911.21  | 77590.16  | 98382.42  | 65683.49  |
| 91715.18  | 74734.8   | 62332.05  | 73075.33  | 77560.25  | 83785.38  | 59591.81  | 91834.19  | 83350.36  | 98571.66  |
| 86072.35  | 78987.47  | 63916.86  | 67556.75  | 86925.79  | 81744.88  | 72210.12  | 87043.89  | 98494.02  | 101438.9  |

|           |           |           |           |           |           |           |           |           |           |
|-----------|-----------|-----------|-----------|-----------|-----------|-----------|-----------|-----------|-----------|
| LP295.226 | LP295.226 | LP295.226 | LP295.227 | LP295.227 | LP295.227 | LP295.226 | LP295.227 | LP295.227 | LP295.227 |
| 111328.8  | 81052.51  | 75132.38  | 95587.53  | 83307.27  | 96542.25  | 84783.2   | 96680.63  | 91158.65  | 90139.86  |
| 118715    | 82255.91  | 74652.84  | 93867.14  | 86107.47  | 93852.3   | 86399.92  | 98725.72  | 77963.71  | 78268.11  |
| 119736.8  | 66802.2   | 73638.58  | 89130.45  | 45362.83  | 89115.63  | 84599.9   | 96651.88  | 80574.45  | 87558.53  |
| 113774.3  | 79828.29  | 72351.57  | 93492.18  | 90530.63  | 96360.96  | 86764.21  | 99053.64  | 81495.66  | 86786.44  |
| 108967.9  | 77144.35  | 74665.28  | 92940.73  | 83270.58  | 103963.1  | 80286.65  | 93797.36  | 81834.37  | 82201.05  |

|           |           |           |           |           |           |           |           |           |           |
|-----------|-----------|-----------|-----------|-----------|-----------|-----------|-----------|-----------|-----------|
| LP295.227 | LP295.226 | LP295.226 | LP295.227 |
| 100429.4  | 76464.4   | 78385.08  | 82732.98  | 84960.76  | 103771.7  | 87811.47  | 119693.6  | 97148.5   | 65681.69  |
| 94284.37  | 72777.41  | 87282.22  | 83076.63  | 78713.66  | 104737.6  | 90364.57  | 117867.6  | 89502.3   | 67052.45  |
| 85883.87  | 75551.68  | 85612.61  | 79708.51  | 77761.19  | 102977.4  | 92507.58  | 119895    | 98887.88  | 67229.32  |
| 95396.38  | 71743.51  | 83682.31  | 81605.44  | 84953.94  | 109962.3  | 86956.99  | 116395    | 96398.91  | 63544.92  |
| 95154.58  | 67659.83  | 80656.26  | 77478.57  | 81199.1   | 106857.6  | 85552.94  | 131869.6  | 93064.27  | 59256.66  |

|           |           |           |           |           |           |           |           |           |           |
|-----------|-----------|-----------|-----------|-----------|-----------|-----------|-----------|-----------|-----------|
| LP295.227 |
| 75378.22  | 110105.1  | 85519.94  | 84763.3   | 64722.47  | 114272    | 75398.78  | 70626.59  | 128177.6  | 79727.12  |
| 67664.51  | 112288.1  | 85409.27  | 92913.63  | 57037.21  | 112749.8  | 77049.49  | 70143.77  | 131140.5  | 79954.91  |
| 66828.98  | 117884.4  | 80496.38  | 90760.18  | 55940.17  | 116033.3  | 84842.23  | 69290.02  | 130616.7  | 85360.5   |
| 66409.35  | 107351.9  | 82015.42  | 83305.7   | 59466.34  | 105623.1  | 66076     | 69937.37  | 122046.3  | 83470.52  |
| 67372.14  | 105546.1  | 86638.76  | 79892.19  | 61162.42  | 102628.9  | 66897.83  | 69727.54  | 135232.2  | 71528.11  |

|           |           |           |           |           |           |           |           |           |           |
|-----------|-----------|-----------|-----------|-----------|-----------|-----------|-----------|-----------|-----------|
| LP295.226 | LP295.227 | LP295.226 | LP295.226 | LP295.299 | LP295.956 | LP295.956 | LP295.956 | LP295.956 | LP295.956 |
| 88318.09  | 106627.9  | 80191.09  | 69878.5   | 44475.42  | 121719.4  | 67638.04  | 67248.88  | 72443.39  | 89979     |
| 88215.38  | 102227.1  | 64752.87  | 70441.47  | 56946.97  | 101363.9  | 63187.59  | 78307.18  | 78354.24  | 99338.59  |
| 95166.01  | 101476.7  | 83071.78  | 74803.97  | 55122.09  | 136646.2  | 74308.2   | 65202.13  | 76415.41  | 122081.5  |
| 92490.57  | 100214.4  | 88456.62  | 69352.94  | 41037.95  | 135859.9  | 51910.1   | 75666.13  | 59147.45  | 86791.41  |
| 83851.98  | 96760.01  | 70657.67  | 68795.88  | 51094.44  | 125717.8  | 54688.39  | 72901.73  | 72238.88  | 96479.17  |



|           |           |           |           |           |           |           |           |           |           |
|-----------|-----------|-----------|-----------|-----------|-----------|-----------|-----------|-----------|-----------|
| LP295.956 | LP295.956 | LP295.956 | LP295.956 | LP295.957 | LP295.956 | LP295.956 | LP295.956 | LP295.956 | LP295.956 |
| 67886.52  | 97823.46  | 38021.43  | 50128.14  | 89336.59  | 109063.7  | 103135.2  | 87767.87  | 117682.1  | 88274.83  |
| 58154.06  | 100177.2  | 44175.99  | 54583.18  | 116127.7  | 98915.14  | 101366.9  | 94390.8   | 99523.56  | 91504.27  |
| 113502    | 97155.77  | 34985.26  | 65001.7   | 116741.6  | 148781.1  | 126964.2  | 106415.8  | 101050.4  | 96023.48  |
| 79123.89  | 106868    | 48281.65  | 55116.12  | 112253.5  | 109467.7  | 92659.58  | 133969.9  | 126149.1  | 139647.6  |
| 71182.95  | 114956.4  | 31139.23  | 42164.49  | 85599.01  | 106056.7  | 117771.1  | 77336.53  | 107445.3  | 86771.26  |

|            |            |            |            |            |            |            |            |            |            |
|------------|------------|------------|------------|------------|------------|------------|------------|------------|------------|
| LP295.956! |
| 98683.35   | 59448.66   | 96828.89   | 106868.6   | 103659.9   | 42946.03   | 65696.14   | 94419.65   | 74150.98   | 104103.8   |
| 90883.35   | 64699.3    | 123686.1   | 92282.23   | 103315     | 44340.04   | 67510.73   | 130987.1   | 67392.26   | 104762     |
| 98323.16   | 77783.51   | 167918.3   | 168428.4   | 97192.98   | 40143.26   | 122191.3   | 88226.24   | 81018.52   | 121154.5   |
| 111874.9   | 46944.75   | 87776.52   | 103356.3   | 136045     | 44481.43   | 81483.94   | 113963.6   | 84062.58   | 101605.4   |
| 116592.9   | 47196.51   | 86584.69   | 98763.58   | 100547.6   | 46630.64   | 71521.44   | 103744.3   | 74497.63   | 136647.9   |

|           |           |           |           |           |           |           |           |           |           |
|-----------|-----------|-----------|-----------|-----------|-----------|-----------|-----------|-----------|-----------|
| LP295.956 |
| 128832.7  | 93367.44  | 111296.1  | 100181.5  | 110736.3  | 105858    | 100762.6  | 82724.87  | 89482.36  | 119266.2  |
| 111129.5  | 94865.41  | 103044.4  | 109635.8  | 99627.4   | 97442.04  | 92944.36  | 79063.61  | 90937.85  | 101811.1  |
| 88978.09  | 116344.9  | 88420.16  | 103676.8  | 86540.58  | 103928.2  | 84968.66  | 77564.76  | 127137.7  | 133294.7  |
| 116377.2  | 111726.1  | 107043.6  | 93664.89  | 117252    | 125287    | 91016.64  | 83751.47  | 94989.56  | 118532.9  |
| 123353.7  | 86157.71  | 119402.8  | 103096.2  | 146556.7  | 148525.4  | 121689    | 96881.97  | 90415.73  | 125745.5  |

|           |           |           |           |           |           |           |           |           |           |
|-----------|-----------|-----------|-----------|-----------|-----------|-----------|-----------|-----------|-----------|
| LP295.956 | LP295.956 | LP295.956 | LP295.956 | LP295.957 | LP295.956 | LP295.956 | LP295.956 | LP295.956 | LP295.956 |
| 93739.96  | 100518.8  | 89777.47  | 106873.4  | 114466.3  | 77700.78  | 98400.17  | 68893.85  | 89600.09  | 122578.8  |
| 95886.03  | 96168.91  | 92742.98  | 99967.47  | 121051    | 99083.21  | 94253.61  | 72561.12  | 92095.88  | 111647.4  |
| 103874.2  | 104945.6  | 100751.4  | 127596.6  | 126854.5  | 91942.05  | 96349.11  | 61518.27  | 95821.84  | 133389.5  |
| 91938.3   | 108373.5  | 90074.03  | 104544.6  | 165080    | 71049.53  | 105110.2  | 78166.16  | 91686.76  | 124911.1  |
| 86748.1   | 103346.9  | 80171.92  | 108395.4  | 127930.2  | 79698.64  | 106721.9  | 63280.08  | 130958.8  | 124913.3  |

|           |           |           |           |           |           |           |           |           |           |
|-----------|-----------|-----------|-----------|-----------|-----------|-----------|-----------|-----------|-----------|
| LP295.956 |
| 100440.5  | 115814.6  | 84829.48  | 112257    | 73942.44  | 70476.52  | 105506.3  | 42208.47  | 102887.4  | 74226.54  |
| 109832.2  | 120631.2  | 76160.97  | 102079.7  | 71999.4   | 71783.38  | 106527.6  | 45931.06  | 109002.6  | 71089.55  |
| 106648.3  | 123938.5  | 80292.28  | 114921.7  | 71833.22  | 63775.44  | 113440.3  | 44582.66  | 106514.2  | 85404.17  |
| 111163.1  | 127940.7  | 80432.84  | 136661    | 76719.52  | 69041.8   | 118798.6  | 45222.97  | 105686.4  | 136192    |
| 102881.3  | 137196.3  | 79414.72  | 100200.4  | 70100.09  | 72302.19  | 117313.5  | 48343.7   | 107515.5  | 76720.79  |

|           |           |           |           |           |           |           |           |           |           |
|-----------|-----------|-----------|-----------|-----------|-----------|-----------|-----------|-----------|-----------|
| LP295.956 | LP295.956 | LP295.956 | LP295.956 | LP295.956 | LP295.957 | LP295.958 | LP295.957 | LP296.194 | LP296.294 |
| 81565.78  | 62250.71  | 95479.69  | 132739.7  | 92580.27  | 111611.8  | 73834.43  | 92036.94  | 17808.24  | 18080.11  |
| 83202.97  | 62239.4   | 92978.16  | 137620.1  | 99344.42  | 103443.2  | 76393.57  | 92413.73  | 14477.69  | 16883.06  |
| 87006.31  | 68395.58  | 95242.83  | 135236.1  | 100040.5  | 81129.78  | 77236.82  | 89909.29  | 13373.85  | 23316.19  |
| 90054.07  | 64036.56  | 98767.36  | 134181.9  | 102140.3  | 115211.5  | 75697.24  | 97096.86  | 11226.46  | 22371.1   |
| 81499.54  | 63760.45  | 92239.55  | 161747.6  | 97396.96  | 107612.8  | 83374.65  | 92321.4   | 13913.96  | 21451.35  |

|           |           |           |           |           |           |           |           |           |           |
|-----------|-----------|-----------|-----------|-----------|-----------|-----------|-----------|-----------|-----------|
| LP296.294 | LP296.294 | LP297.082 | LP297.082 | LP297.082 | LP297.130 | LP297.131 | LP297.131 | LP297.131 | LP297.131 |
| 13404.76  | 20408.88  | 47245.06  | 87107.36  | 51164.92  | 69667.21  | 86577.34  | 93971.22  | 79334.27  | 92707.37  |
| 11960.39  | 21346.48  | 49966.19  | 85217.34  | 48556.82  | 104242.7  | 72494.61  | 63250.79  | 61830.26  | 88607.63  |
| 13563.68  | 20961.59  | 54621.61  | 89255.02  | 54215.9   | 71052.12  | 104011.7  | 86495.82  | 79887.22  | 86765.07  |
| 13678.43  | 15541.08  | 56067.62  | 102686    | 55109.42  | 75834.62  | 61446.63  | 89905.46  | 54766.59  | 78165.11  |
| 15944.22  | 19369.05  | 53160.18  | 106353.1  | 53288.72  | 63790.59  | 65814.11  | 103910.4  | 58425.22  | 88762.15  |

|           |           |           |           |           |           |           |           |           |           |
|-----------|-----------|-----------|-----------|-----------|-----------|-----------|-----------|-----------|-----------|
| LP297.131 |
| 77467.83  | 88714.56  | 82564     | 98562.28  | 92147.17  | 81345     | 87802.85  | 77398.05  | 89491.18  | 70794.21  |
| 71756.47  | 88845.34  | 80667.55  | 85032.26  | 92669.89  | 65467.31  | 76830.34  | 87501.16  | 73028.27  | 79297.04  |
| 72966.55  | 113499.2  | 87931.64  | 108778.1  | 72345.87  | 120768.3  | 85076.38  | 74396.35  | 102790.5  | 62093.49  |
| 64844.54  | 105221.8  | 80760.46  | 104252.2  | 148118.4  | 87804.44  | 83506.21  | 58948.12  | 82100.57  | 70851.76  |
| 71337.54  | 97416.29  | 75392.23  | 88344.75  | 97666.99  | 80239.57  | 66988.44  | 77806.59  | 89145.23  | 85225.13  |



|           |           |           |           |           |           |           |           |           |           |
|-----------|-----------|-----------|-----------|-----------|-----------|-----------|-----------|-----------|-----------|
| LP297.131 |
| 62956.32  | 75794.57  | 48861.58  | 71328.84  | 93957.11  | 106067.9  | 81894.32  | 81896.28  | 54714.58  | 77471.44  |
| 57083.86  | 61110.65  | 63995.1   | 91707.64  | 64454.28  | 85243.06  | 99244.89  | 95564.34  | 72747.22  | 69778.54  |
| 124117.1  | 76013.65  | 72284.76  | 79749.83  | 83947.93  | 97649.86  | 110232.2  | 62120.17  | 50330.16  | 84849.4   |
| 86272.49  | 59917.78  | 81422.44  | 55282.07  | 124030.7  | 123099.2  | 73489     | 73761.12  | 82931.77  | 75644.34  |
| 95782.8   | 64800.57  | 54038.15  | 81758.13  | 65664.65  | 72480.36  | 101843.1  | 103939.6  | 89441.17  | 79201.94  |

|           |           |           |           |           |           |           |           |           |           |
|-----------|-----------|-----------|-----------|-----------|-----------|-----------|-----------|-----------|-----------|
| LP297.131 |
| 106333.7  | 89301.15  | 77790.15  | 78414.79  | 73761.06  | 106367.9  | 71892.37  | 73379.22  | 57396.67  | 120932.9  |
| 69486.93  | 85246.37  | 77819.05  | 84037.3   | 63098.12  | 79630.81  | 76698.7   | 77772.47  | 56119.58  | 80837.19  |
| 110842.7  | 98230.35  | 78505.14  | 88686.67  | 75376.13  | 65276.43  | 86088.47  | 72804.66  | 148873.5  | 111646.7  |
| 79759.34  | 103929.7  | 90209.04  | 104889.7  | 82452.34  | 65371.99  | 86767.36  | 62790.85  | 94292.67  | 94556.58  |
| 78700.41  | 77681.38  | 79295.54  | 68057.38  | 74364.61  | 87734.54  | 81401.68  | 69424.63  | 65708.34  | 79620.83  |

|           |           |           |           |           |           |           |           |           |           |
|-----------|-----------|-----------|-----------|-----------|-----------|-----------|-----------|-----------|-----------|
| LP297.131 |
| 116214.1  | 63957.4   | 107548.3  | 106917.1  | 80045.74  | 100959.3  | 124508.5  | 86514.2   | 100770.3  | 82705.76  |
| 75343     | 60233.15  | 69622.89  | 81592.11  | 107824.8  | 84839.62  | 81913.87  | 95165.54  | 122927.8  | 76378.17  |
| 104380.3  | 59385.24  | 95829.86  | 91582.65  | 102772.1  | 88014.26  | 73526.02  | 75633.93  | 92850.5   | 85680.62  |
| 82988.73  | 74380.97  | 65919.7   | 99793.62  | 76089.46  | 70801.14  | 78128.45  | 120875.2  | 75367.12  | 64604.14  |
| 79946.38  | 82440.88  | 67493.75  | 80394.84  | 81869.87  | 90632.25  | 75172.22  | 126140.4  | 93102.4   | 118507.6  |

|           |           |           |           |           |           |           |           |           |           |           |
|-----------|-----------|-----------|-----------|-----------|-----------|-----------|-----------|-----------|-----------|-----------|
| LP297.131 |
| 74073.91  | 103246.3  | 90200.77  | 75799.51  | 80882.81  | 55080.91  | 84733.25  | 41307.93  | 64073.58  | 64238.59  |           |
| 115664.4  | 88675.29  | 97512.14  | 62218.09  | 79008.18  | 49049.4   | 63454.94  | 45150.97  | 98700.92  | 74211.85  |           |
| 99141.59  | 89218.51  | 84269.59  | 78426.85  | 70576.65  | 49188.92  | 85068.54  | 47612.65  | 102214.5  | 66597.16  |           |
| 80662.31  | 115314.2  | 77956.26  | 73361.2   | 65224.7   | 91462.3   | 91620.43  | 39895.42  | 98107.72  | 58838.58  |           |
| 108052.8  | 89183.13  | 86821.89  | 61150.48  | 97089.62  | 56413.96  | 82426.02  | 51922.89  | 111517.3  | 65211.3   |           |

|           |           |           |           |           |           |           |           |           |           |
|-----------|-----------|-----------|-----------|-----------|-----------|-----------|-----------|-----------|-----------|
| LP297.131 |
| 80587.82  | 77088.45  | 75830.43  | 115866.4  | 80636.11  | 75284.34  | 42763.36  | 44844.19  | 58450.61  | 63061.19  |
| 68900.36  | 72080.68  | 103710.9  | 93001.56  | 80849.47  | 72576.27  | 49319.03  | 53042.89  | 57682.06  | 102493.7  |
| 78784.27  | 89033.95  | 80894.36  | 94319.37  | 61731.31  | 81108.06  | 53244.18  | 59341.36  | 63406.23  | 52137.7   |
| 59308.52  | 86390.14  | 72917     | 87127.72  | 67157.33  | 82988.11  | 45860.78  | 42658.02  | 52382.55  | 70166.77  |
| 76878.62  | 65907.07  | 92156.86  | 75997.58  | 61458.23  | 76109.54  | 37130.85  | 76215.09  | 62329.38  | 58587.22  |

|           |           |           |           |           |           |           |           |           |           |
|-----------|-----------|-----------|-----------|-----------|-----------|-----------|-----------|-----------|-----------|
| LP297.131 |
| 76213.96  | 86958.03  | 63145.36  | 40192.64  | 56244.5   | 85012.44  | 33668.49  | 37130.86  | 31090.1   | 34551.07  |
| 88876.31  | 75325.02  | 62107.98  | 56674.46  | 44298.66  | 83331.08  | 37453.84  | 41120.25  | 27933.48  | 35384.61  |
| 81097.81  | 87423.03  | 83099.57  | 33167.09  | 38313.99  | 84634     | 39758.12  | 36241.95  | 31915.97  | 33248.84  |
| 82720.96  | 70491.97  | 64319.2   | 38361.8   | 43473.45  | 83301.16  | 36528.3   | 26461.48  | 36960.17  | 30609.16  |
| 101645.5  | 101071.1  | 72915.26  | 45224.95  | 34926.6   | 63427.87  | 24620.45  | 28737.89  | 23955.52  | 35594.2   |

|           |           |           |           |           |           |           |           |           |           |
|-----------|-----------|-----------|-----------|-----------|-----------|-----------|-----------|-----------|-----------|
| LP297.131 | LP297.131 | LP297.131 | LP297.131 | LP297.131 | LP297.168 | LP297.169 | LP297.168 | LP297.169 | LP297.169 |
| 38701.76  | 57342.84  | 34913.92  | 38442.02  | 58532     | 66281.3   | 80261.94  | 66437.53  | 64242.58  | 87212.83  |
| 41022.22  | 39378.6   | 33406.49  | 47561.43  | 58648.16  | 68919.74  | 92238.43  | 63038.34  | 111631.4  | 81701.09  |
| 29402.74  | 37584.94  | 43022.06  | 38902.8   | 66246.06  | 67500.91  | 81631.48  | 70682.83  | 116681.1  | 85917.32  |
| 38207.29  | 51297.49  | 53534.58  | 36749.82  | 68219.03  | 65555.75  | 86545.38  | 71013.55  | 114613.9  | 85130.12  |
| 33306.71  | 36487.34  | 27847.29  | 32247.56  | 67805.86  | 80209.4   | 85970.4   | 66292.66  | 121542.1  | 87068.06  |

|           |           |           |           |           |           |           |           |           |           |
|-----------|-----------|-----------|-----------|-----------|-----------|-----------|-----------|-----------|-----------|
| LP297.169 | LP297.169 | LP297.169 | LP297.169 | LP297.168 | LP297.169 | LP297.168 | LP297.168 | LP297.168 | LP297.168 |
| 85914.4   | 82541.58  | 68678.63  | 83178.58  | 63558.99  | 73356.32  | 85859.28  | 73267.25  | 56788.02  | 54783.71  |
| 82185.27  | 69522.15  | 69828.01  | 74786.35  | 65789.98  | 98946.66  | 91059.03  | 71165.97  | 58185.28  | 53045.53  |
| 76217.43  | 76441.95  | 68099.62  | 80369.91  | 61742.17  | 106576.7  | 93928.69  | 69554.4   | 55376.38  | 58457.07  |
| 79957.08  | 81598.42  | 76199.43  | 79654.47  | 66415.52  | 103125.7  | 86842.76  | 75533.24  | 59915.54  | 49867.41  |
| 76112.27  | 82592.04  | 76742.53  | 79742.98  | 67672.73  | 113826.5  | 94573.24  | 73212.79  | 54448.14  | 56763.29  |



|           |           |           |           |           |           |           |           |           |           |
|-----------|-----------|-----------|-----------|-----------|-----------|-----------|-----------|-----------|-----------|
| LP297.169 | LP297.168 | LP297.168 | LP297.205 | LP297.206 | LP297.205 | LP297.206 | LP297.206 | LP297.205 | LP297.206 |
| 98791.3   | 46536.27  | 73842.38  | 80972.12  | 73935.86  | 77545.38  | 87524.07  | 98284.54  | 119122.9  | 79901.8   |
| 95716.31  | 43430.34  | 63165.1   | 68333.84  | 76391.84  | 86205.45  | 85440.82  | 97728.34  | 110489.8  | 84308.03  |
| 95992.08  | 47745.02  | 71349.47  | 75216.77  | 67955.81  | 82063.95  | 81237.47  | 101169.9  | 120169.3  | 81918.12  |
| 103162.2  | 38875.37  | 75303.26  | 76242.91  | 65634.74  | 81520.47  | 86256.13  | 96485.05  | 124664.1  | 84557     |
| 99789.71  | 42061.1   | 75618.02  | 84485.47  | 70293.03  | 92966.24  | 84829.65  | 98934.32  | 125288.7  | 81850.63  |

|           |           |           |           |           |           |           |           |           |           |
|-----------|-----------|-----------|-----------|-----------|-----------|-----------|-----------|-----------|-----------|
| LP297.206 | LP297.206 | LP297.206 | LP297.205 | LP297.206 | LP297.206 | LP297.206 | LP297.206 | LP297.206 | LP297.206 |
| 68228.05  | 64261.33  | 57775.51  | 133044.9  | 87700.83  | 73979.88  | 57632     | 86503.65  | 90118.86  | 71494.84  |
| 68123.78  | 62517.55  | 62475.06  | 135342.1  | 89193.58  | 76818.49  | 51235.93  | 80314.44  | 82056.75  | 71508.67  |
| 62719.95  | 57391.44  | 54194.5   | 143813.6  | 88088.03  | 70015.08  | 60763.23  | 78091.21  | 84205.1   | 72539.21  |
| 64526.47  | 61732.18  | 54769.86  | 148097.1  | 85083.13  | 80031.86  | 61323.93  | 81586.01  | 81869.77  | 73167.42  |
| 68911.61  | 65414.96  | 56041.22  | 140552.9  | 86680.69  | 82866.07  | 60792.35  | 89974.59  | 91841     | 71399.54  |

|           |           |           |           |           |           |           |           |           |           |
|-----------|-----------|-----------|-----------|-----------|-----------|-----------|-----------|-----------|-----------|
| LP297.206 | LP297.206 | LP297.206 | LP297.205 | LP297.206 | LP297.206 | LP297.206 | LP297.205 | LP297.205 | LP297.241 |
| 89111.02  | 71647.69  | 90646.26  | 103772.1  | 75178.94  | 86872.64  | 112768    | 63571.29  | 72195.96  | 123775.1  |
| 93343.92  | 71297.15  | 87500.74  | 96293.69  | 78580.44  | 91129.58  | 94319.21  | 65060.17  | 73320.22  | 131771.9  |
| 91839.88  | 65571.64  | 84793.05  | 100170.7  | 77993.82  | 90439.15  | 100817.6  | 66780.7   | 75980.62  | 137825.3  |
| 84136.7   | 64578.94  | 86391.13  | 109762.9  | 74874.02  | 90925.89  | 103579.3  | 69482.97  | 80571.32  | 136347    |
| 90272.85  | 67648.35  | 90115.02  | 103605    | 76905.67  | 95459.58  | 97628.77  | 57261.78  | 80501.95  | 147218.1  |

|           |           |           |           |           |           |           |           |           |           |
|-----------|-----------|-----------|-----------|-----------|-----------|-----------|-----------|-----------|-----------|
| LP297.242 |
| 91339.44  | 87856.13  | 72571.2   | 109576.7  | 80825.26  | 103224.5  | 115825.9  | 63475.14  | 126067.1  | 90131.32  |
| 104207.2  | 104673.1  | 78262.02  | 119837.3  | 84012.94  | 102424.3  | 107480.7  | 68103.41  | 103985.7  | 94228.28  |
| 100046.4  | 96131.2   | 69649.33  | 110507.9  | 77225.02  | 107985.1  | 115552.9  | 62150.17  | 133942.2  | 90357.1   |
| 100550.8  | 94825.38  | 71354.18  | 112441.8  | 82060.5   | 107961.7  | 107964.8  | 62769.86  | 137474.6  | 92868.98  |
| 107633.4  | 99365.05  | 87058.59  | 113397.8  | 81004.41  | 114576.7  | 118826.7  | 63321.03  | 129991.3  | 92095.16  |

|           |           |           |           |           |           |           |           |           |           |
|-----------|-----------|-----------|-----------|-----------|-----------|-----------|-----------|-----------|-----------|
| LP297.242 | LP297.242 | LP297.242 | LP297.244 | LP297.279 | LP297.278 | LP297.278 | LP297.278 | LP297.278 | LP297.278 |
| 100670.4  | 82832.32  | 73840.23  | 66363.14  | 140079.7  | 79250.47  | 68094.09  | 111069.8  | 59195.58  | 47620.58  |
| 96603.56  | 89002.83  | 75338.4   | 67749.21  | 135470.3  | 89281.16  | 67604.68  | 109984.5  | 48214.27  | 47178.52  |
| 98003.68  | 78762.57  | 73925.2   | 62957.65  | 105610.5  | 87381.45  | 94983.69  | 106213.4  | 63016.11  | 48934.4   |
| 92601.57  | 85455.92  | 75647.17  | 68198.49  | 119008.5  | 80312.14  | 70150.17  | 111028.5  | 57720.8   | 46347.6   |
| 98880.63  | 81257.79  | 80837.19  | 65333.45  | 119463.4  | 84341.24  | 68146.88  | 114226.4  | 46042.83  | 44838.69  |

|           |           |           |           |           |           |           |           |           |           |
|-----------|-----------|-----------|-----------|-----------|-----------|-----------|-----------|-----------|-----------|
| LP297.278 | LP297.278 | LP297.278 | LP297.279 | LP297.278 | LP297.279 | LP297.278 | LP297.279 | LP297.278 | LP297.279 |
| 48984.48  | 70417.45  | 99614.28  | 75256.04  | 38902.11  | 81562.36  | 84952.1   | 57471.38  | 51725.99  | 75749.17  |
| 49537.59  | 69399.46  | 94751.99  | 76826.19  | 38593.03  | 82522.05  | 79026.4   | 56856.84  | 56694.28  | 79441.06  |
| 66103.12  | 58774.83  | 93782.71  | 108836.3  | 35893.4   | 88144.4   | 81215.2   | 60852.3   | 58780.66  | 75210.19  |
| 49180.69  | 86319.46  | 109029.8  | 73302.99  | 42255.33  | 78267.49  | 78602.8   | 62032.15  | 54784.14  | 76612.02  |
| 50436.98  | 66011.71  | 105274.9  | 78673.49  | 37065.67  | 90765.95  | 91463.84  | 55562.02  | 56040.86  | 77458.43  |

|           |           |           |           |           |           |           |           |           |           |
|-----------|-----------|-----------|-----------|-----------|-----------|-----------|-----------|-----------|-----------|
| LP297.278 | LP297.278 | LP297.278 | LP297.278 | LP297.279 | LP297.279 | LP297.278 | LP297.315 | LP298.310 | LP298.310 |
| 121297.3  | 76199.64  | 60560.7   | 76516.92  | 67584.05  | 82319.96  | 65104.45  | 54968.73  | 105048.8  | 607488.2  |
| 85894.69  | 61714.93  | 73388.66  | 74540.88  | 72268.31  | 71819.21  | 62102     | 20276.33  | 107850.7  | 696928.1  |
| 88041.48  | 64814.66  | 70801.04  | 85486.6   | 63110.69  | 73577.28  | 65537.88  | 26587.9   | 138221    | 1072605   |
| 84783.89  | 62173.65  | 69749.91  | 73947.02  | 61154.94  | 69975.03  | 61984.46  | 26007.38  | 157675.3  | 1329472   |
| 96616.73  | 63440.51  | 70592.16  | 75851.79  | 65093.54  | 75980.01  | 60105.26  | 57057.73  | 170873.6  | 1457434   |

|           |           |           |           |           |           |           |           |           |           |
|-----------|-----------|-----------|-----------|-----------|-----------|-----------|-----------|-----------|-----------|
| LP298.346 | LP298.877 | LP299.061 | LP299.062 | LP299.061 | LP299.079 | LP299.147 | LP299.147 | LP299.147 | LP299.147 |
| 76500.79  | 24551.43  | 32040.18  | 36167.07  | 40756.47  | 30303.21  | 53226.86  | 80911.99  | 66778.79  | 79770.96  |
| 78513.97  | 18761.87  | 34311.76  | 37429.53  | 40460.79  | 32474.88  | 92645.64  | 85549.13  | 71138.89  | 80645.97  |
| 97167.26  | 22246.53  | 33061.41  | 34909.09  | 37064.18  | 26829.01  | 64726.98  | 75896.2   | 75139.39  | 76183.13  |
| 103436.6  | 23318.09  | 30032.36  | 36395.33  | 37797.96  | 24877.36  | 64483.98  | 65604.19  | 67037.31  | 73393.61  |
| 109491    | 18809.71  | 35023.86  | 34878.19  | 36391.31  | 25489.31  | 58413.09  | 46572.6   | 63479.56  | 74600.63  |



|           |           |           |           |           |           |           |           |           |           |
|-----------|-----------|-----------|-----------|-----------|-----------|-----------|-----------|-----------|-----------|
| LP299.147 |
| 56250.49  | 62938.7   | 51656.5   | 70621.4   | 63454.61  | 49574     | 86949.79  | 54823.24  | 97582.63  | 78332.13  |
| 63531.65  | 63410.21  | 51657.03  | 85715.46  | 62354.68  | 86263.59  | 67821.73  | 57156.94  | 81224.57  | 70527.84  |
| 90129.8   | 51864.73  | 68343.31  | 97402.97  | 66597.31  | 82082.65  | 125112.5  | 65819.71  | 82006.99  | 66378.92  |
| 61631.41  | 53403     | 51534.14  | 80623.66  | 58555.63  | 93081.92  | 65978.98  | 54328.13  | 79931.56  | 62283.19  |
| 65289.45  | 68074.6   | 61198.41  | 82675.39  | 63232.9   | 79156.55  | 78377.12  | 55692.03  | 86745.07  | 68105.07  |

|           |           |           |           |           |           |           |           |           |           |
|-----------|-----------|-----------|-----------|-----------|-----------|-----------|-----------|-----------|-----------|
| LP299.147 |
| 83790.12  | 94438.68  | 73206.15  | 74206.33  | 98213.68  | 76493.33  | 63168.53  | 154674.1  | 89569.96  | 76966.61  |
| 88386.6   | 85417.29  | 82761.04  | 63607.86  | 84886.88  | 70351.79  | 50610.78  | 58460.54  | 94526.26  | 66054.52  |
| 91909.57  | 79440.02  | 78083.52  | 77657.63  | 106434.1  | 67859.39  | 59414.09  | 61756.49  | 119495.1  | 53976.56  |
| 61720.91  | 81422.16  | 77942.91  | 59731.02  | 79363.48  | 77482.77  | 69229.77  | 61635.64  | 87619.23  | 68514.96  |
| 63691.46  | 87442.56  | 80921.97  | 63732.18  | 77028.93  | 70466.66  | 64603.84  | 65760.43  | 86762.91  | 68413.92  |

|           |           |           |           |           |           |           |           |           |           |
|-----------|-----------|-----------|-----------|-----------|-----------|-----------|-----------|-----------|-----------|
| LP299.147 |
| 51201.36  | 106067.1  | 72457.79  | 55963.81  | 74518.9   | 71545.16  | 76440.08  | 66353.47  | 60336.36  | 107753.2  |
| 51609.66  | 62381.31  | 73264.97  | 80812.05  | 58942.95  | 49530.01  | 79189.23  | 64015.92  | 64427.78  | 72123.58  |
| 57459.75  | 68569.44  | 66639.72  | 75249.66  | 60907.7   | 59166.45  | 73543.62  | 66980.99  | 87738.62  | 73632.6   |
| 51067.96  | 65922.49  | 74322.68  | 69475.14  | 59285.07  | 58853.24  | 72690.06  | 65548.48  | 59598.27  | 70049.57  |
| 52360.41  | 70282.62  | 62833.4   | 69227.51  | 57482.92  | 54338.89  | 76541.62  | 65245.09  | 62690.59  | 75698.9   |

|           |           |           |           |           |           |           |           |           |           |
|-----------|-----------|-----------|-----------|-----------|-----------|-----------|-----------|-----------|-----------|
| LP299.147 |
| 137724.7  | 67098.99  | 93341.5   | 82243.04  | 55244.44  | 69800.48  | 73693.58  | 80929.21  | 59283.61  | 50894.05  |
| 81136.37  | 62347.87  | 48125.23  | 74317.4   | 59796.31  | 58665.96  | 75048.6   | 83220.75  | 58480.53  | 56491.97  |
| 76192.06  | 62670.63  | 53236.97  | 76854.77  | 57831.31  | 64229.66  | 79529.9   | 79884.59  | 57090.45  | 58783.39  |
| 81822.42  | 58553.71  | 59311.29  | 76186.24  | 59113.93  | 61560.8   | 72328.58  | 84810.43  | 57813.15  | 61745.51  |
| 84165.5   | 60068.04  | 50909.12  | 73368.01  | 57932.13  | 64609.78  | 71061.17  | 80116.82  | 56053.14  | 59034.29  |

|           |           |           |           |           |           |           |           |           |           |
|-----------|-----------|-----------|-----------|-----------|-----------|-----------|-----------|-----------|-----------|
| LP299.147 |
| 62642.62  | 48191.53  | 30488.92  | 40188.02  | 32519.73  | 40700.88  | 27288.22  | 38661.76  | 123753.2  | 73616.03  |
| 68991.07  | 50473.48  | 32887.45  | 39669.16  | 40895.15  | 39803.21  | 25506.55  | 38184.22  | 67494.84  | 67857.26  |
| 65422.31  | 45557.88  | 30711.39  | 34595.94  | 32532.66  | 35516.47  | 24855.43  | 37035.87  | 79061.73  | 70973.17  |
| 57456.03  | 46678.48  | 32927.37  | 34444.97  | 33932.32  | 36152.07  | 25169.06  | 37443.59  | 76201.89  | 82160.46  |
| 61325.97  | 48980.08  | 33349.71  | 36973.35  | 33114.43  | 37472.96  | 24725.16  | 39045.55  | 75379.17  | 70707.6   |

|           |           |           |           |           |           |           |           |           |           |
|-----------|-----------|-----------|-----------|-----------|-----------|-----------|-----------|-----------|-----------|
| LP299.147 | LP299.148 |
| 65053.08  | 68451.76  | 66287.23  | 66624.1   | 65807.3   | 48911.78  | 61965.02  | 51283.83  | 64441.56  | 21941.81  |
| 68055.03  | 82670.93  | 55501.41  | 65192.49  | 80825.38  | 64904.84  | 91756.3   | 68716.97  | 63611.77  | 21052.61  |
| 87929.82  | 103734.7  | 71464.33  | 60830.54  | 81810.4   | 71675.17  | 90126.67  | 68523.83  | 60798.37  | 18999.34  |
| 62771.78  | 101601.2  | 62501.48  | 62311.63  | 78783.79  | 70806.63  | 94339.54  | 70470.36  | 64606.49  | 14743.37  |
| 70095.29  | 84540.1   | 60362.6   | 66513.49  | 81710.92  | 67185.5   | 93481.04  | 68842.16  | 65176.47  | 20547.81  |

|           |           |           |           |           |           |           |           |           |           |
|-----------|-----------|-----------|-----------|-----------|-----------|-----------|-----------|-----------|-----------|
| LP299.148 | LP299.147 | LP299.162 | LP299.185 | LP299.185 | LP299.185 | LP299.184 | LP299.185 | LP299.185 | LP299.185 |
| 36577.93  | 59569.74  | 22833.03  | 31146.52  | 35119.33  | 39374.15  | 33854.05  | 39678.26  | 33427.48  | 30313.1   |
| 40853.16  | 62194.64  | 22880.31  | 29940.1   | 36167.96  | 38070.39  | 36841.83  | 36865.25  | 32603.05  | 31223.71  |
| 38913.99  | 61016.04  | 19160.81  | 35784.54  | 32280.1   | 36444.79  | 35121.42  | 41252.79  | 35768.73  | 27969.16  |
| 39154.79  | 56775.31  | 17576.72  | 34753.95  | 31586.13  | 34324.56  | 32997.5   | 40511.92  | 35689.02  | 30194.62  |
| 37772.67  | 60200.9   | 17739.92  | 34899.76  | 34939.98  | 37461.84  | 34857.49  | 37880.96  | 32226.53  | 27649.2   |

|           |           |           |           |           |           |           |           |           |           |
|-----------|-----------|-----------|-----------|-----------|-----------|-----------|-----------|-----------|-----------|
| LP299.185 | LP299.185 | LP299.185 | LP299.184 | LP299.184 | LP299.185 | LP299.185 | LP299.184 | LP299.184 | LP299.185 |
| 36999.17  | 43604.47  | 38015.01  | 37234.75  | 29824.63  | 37511.72  | 47032.08  | 40043.57  | 32732.17  | 30236.24  |
| 35740.88  | 33621.8   | 34830.94  | 39534.26  | 28443.68  | 42202.5   | 54924.78  | 43450.28  | 37019.27  | 29034.2   |
| 36532.94  | 40208.95  | 38216.18  | 36784.11  | 34133.33  | 37121.63  | 51275.09  | 38730.15  | 36912.74  | 27307.3   |
| 35937.73  | 40410.81  | 36333.16  | 36323.11  | 31003.84  | 38619.25  | 54802.58  | 44431.42  | 33219.5   | 27094.72  |
| 40576.21  | 35563.94  | 33355.08  | 36579.43  | 31452.02  | 40137.09  | 48862.14  | 43880.86  | 37979.47  | 31195.34  |



|           |           |           |           |           |           |           |           |           |           |
|-----------|-----------|-----------|-----------|-----------|-----------|-----------|-----------|-----------|-----------|
| LP299.184 | LP299.185 | LP299.185 | LP299.185 | LP299.185 | LP299.184 | LP299.185 | LP299.185 | LP299.185 | LP299.185 |
| 45213.04  | 28706.47  | 55230.94  | 28895.15  | 50744.34  | 26964.93  | 29405.13  | 44771.82  | 33769.79  | 30229.57  |
| 43342.54  | 26381.7   | 49376.91  | 26667.8   | 50731.95  | 25581.5   | 27720.12  | 46468.31  | 33992.92  | 31089.24  |
| 44606.78  | 25359.74  | 53942.44  | 30193.73  | 51639.95  | 26687.54  | 29408.6   | 46665.6   | 35198.57  | 31927.73  |
| 46287.25  | 25815.27  | 51117.21  | 29393.95  | 52946.66  | 25586.53  | 24252.64  | 43043.29  | 34332.45  | 31670.52  |
| 43372.14  | 28693.07  | 54641.72  | 27767.75  | 57213.99  | 24949.05  | 31649.39  | 38773.27  | 30441.05  | 28627.48  |

|           |           |           |           |           |           |           |           |           |           |
|-----------|-----------|-----------|-----------|-----------|-----------|-----------|-----------|-----------|-----------|
| LP299.185 | LP299.185 | LP299.257 | LP299.257 | LP299.258 | LP299.258 | LP299.258 | LP299.258 | LP299.258 | LP299.258 |
| 41634.57  | 51599.55  | 65301.94  | 41849.04  | 63336.53  | 79565.7   | 41891.16  | 39452.27  | 54776.46  | 33523.42  |
| 46451.94  | 51254.01  | 66203.58  | 44365.35  | 59920.53  | 76436.71  | 39530.01  | 40523.69  | 49061.1   | 38341.82  |
| 43243.69  | 46134.02  | 65605.55  | 44617.35  | 61547.15  | 83319.38  | 35389.23  | 40497.64  | 55339.56  | 36110.98  |
| 42868.88  | 49736.68  | 61687.99  | 42240.04  | 65547.37  | 81126.83  | 39074.19  | 43603.08  | 60369.81  | 35004.36  |
| 44242.63  | 44978.76  | 67534.84  | 40806.6   | 61025.22  | 88055.4   | 37681.94  | 41883.97  | 55600.42  | 35715.96  |

|           |           |           |           |           |           |           |           |           |           |
|-----------|-----------|-----------|-----------|-----------|-----------|-----------|-----------|-----------|-----------|
| LP299.258 |
| 31072.86  | 30983.97  | 37007.37  | 49131.82  | 49286.93  | 62945.61  | 37635.9   | 48004.32  | 46344.83  | 25811.1   |
| 33900.18  | 26606.83  | 34070.62  | 49491.04  | 49369.02  | 69818.43  | 35153.88  | 48208.11  | 46993.89  | 25276.65  |
| 33316.32  | 27147.63  | 36127.84  | 51030.68  | 43324.18  | 66570.15  | 43470.15  | 47639.06  | 47669.26  | 26797.72  |
| 30686.39  | 28506.08  | 39415.28  | 47902.89  | 50096.98  | 65369.91  | 40424.2   | 44230.91  | 48513.68  | 27283.66  |
| 34278.69  | 26244.22  | 43122.55  | 44810.55  | 49284.42  | 78238.15  | 41792.43  | 51424.83  | 46628.26  | 28187.73  |

|           |           |           |           |           |           |           |           |           |           |
|-----------|-----------|-----------|-----------|-----------|-----------|-----------|-----------|-----------|-----------|
| LP299.258 | LP299.257 | LP299.258 | LP299.258 |
| 38900.25  | 69542.75  | 61657     | 28818.38  | 34092.31  | 40910.85  | 43269.19  | 35322.73  | 56211.18  | 61322.39  |
| 35137.59  | 71587.63  | 59975.24  | 30922.64  | 29437.26  | 46845.61  | 47411.56  | 35800.64  | 59335.16  | 65945.48  |
| 37009.43  | 71441.92  | 63160.28  | 26112.23  | 28968.79  | 43627.31  | 40841.94  | 33349.29  | 56170.13  | 63546.86  |
| 38619.71  | 70441.7   | 61287.08  | 29057.06  | 30618.31  | 41626.04  | 46050.5   | 32902.26  | 56166.44  | 60856.72  |
| 34657.54  | 72380.6   | 63225.92  | 30837.5   | 31458.02  | 47343.88  | 43430.94  | 34600.53  | 58912.55  | 67195.26  |

|           |           |           |           |           |           |           |           |           |           |
|-----------|-----------|-----------|-----------|-----------|-----------|-----------|-----------|-----------|-----------|
| LP299.258 | LP299.258 | LP299.258 | LP299.258 | LP299.258 | LP299.257 | LP299.258 | LP299.258 | LP299.258 | LP299.258 |
| 44429.46  | 49971.35  | 38616.8   | 34329.11  | 32750.55  | 47193.6   | 45626.67  | 31555.01  | 48331     | 42033.99  |
| 48673.94  | 55210.21  | 37496.69  | 36619.6   | 32429.22  | 32909.82  | 48888.6   | 32198.61  | 46876.47  | 40957.1   |
| 50553.55  | 54059.47  | 38674.67  | 34614.72  | 33215.73  | 42480.54  | 42082.59  | 28778.58  | 51184.91  | 41255.79  |
| 41700.22  | 50014.46  | 35771.84  | 33965.02  | 35724.89  | 45004.2   | 47441.12  | 29228.74  | 58940.48  | 40571.69  |
| 45955.33  | 53059.58  | 38169.93  | 40996.55  | 39055.84  | 39888.01  | 47882.6   | 27052.71  | 53860.52  | 43194.31  |

|           |           |           |           |           |           |           |           |           |           |
|-----------|-----------|-----------|-----------|-----------|-----------|-----------|-----------|-----------|-----------|
| LP299.258 | LP299.258 | LP299.294 | LP299.350 | LP300.144 | LP300.144 | LP300.144 | LP300.144 | LP300.144 | LP300.144 |
| 46391.91  | 35177.54  | 35548.26  | 68726.57  | 176164.8  | 137793.1  | 199894.7  | 179020.2  | 370064.3  | 312680.9  |
| 51244.97  | 38189.93  | 31909.95  | 65410.37  | 233421.2  | 204427.6  | 181622.9  | 188602.3  | 469521.5  | 401044.6  |
| 50712.37  | 38578.54  | 30351.02  | 67945.39  | 204805.3  | 154745.7  | 253058.5  | 243318.8  | 478571    | 336113.9  |
| 48596.14  | 42414.63  | 31480.78  | 59864.93  | 161826.7  | 110517.9  | 201047.4  | 173797.9  | 333243.6  | 370339.4  |
| 49419.51  | 38161.64  | 27421.13  | 58807.15  | 177952.3  | 123427.4  | 203036.4  | 174653.6  | 318337.9  | 348504.5  |

|           |           |           |           |           |           |           |           |           |           |
|-----------|-----------|-----------|-----------|-----------|-----------|-----------|-----------|-----------|-----------|
| LP300.144 |
| 205476.7  | 347869.3  | 220822.7  | 290836.6  | 312961.9  | 296875    | 233934.4  | 319477.2  | 378190.1  | 209322.6  |
| 241131.1  | 401975    | 181943    | 296941.7  | 332107.5  | 382398.3  | 252812.1  | 327055.4  | 285035.8  | 230925.2  |
| 225218.6  | 414864.9  | 235955.1  | 287337.5  | 363293.2  | 282236.7  | 245008.1  | 351403.3  | 392535.9  | 156648.7  |
| 206526.7  | 546193.7  | 231493.1  | 431396.2  | 290774.5  | 244420.6  | 251957.3  | 326350    | 383917.1  | 228567.2  |
| 187701.7  | 295048.3  | 223430.3  | 340513.5  | 295243    | 297214.5  | 248541    | 343579.8  | 395539.6  | 216736.3  |

|           |           |           |           |           |           |           |           |           |           |
|-----------|-----------|-----------|-----------|-----------|-----------|-----------|-----------|-----------|-----------|
| LP300.144 |
| 228124.5  | 239583.1  | 342150.3  | 158455.1  | 212922.8  | 345516.3  | 238978.3  | 294212.2  | 185083.3  | 257527.1  |
| 255631.5  | 292164.8  | 329039.1  | 209985.5  | 204962.3  | 304325.5  | 262245.5  | 349610.1  | 187407.9  | 241291.7  |
| 237035.5  | 224503.1  | 274049.6  | 157921.8  | 193516.7  | 322469.1  | 230372.8  | 222067.7  | 193212.4  | 256518.3  |
| 230385.9  | 224253.5  | 309122.4  | 160458.3  | 221253.2  | 314764.3  | 234416.3  | 392712    | 201298.3  | 307513    |
| 225551.4  | 239540.6  | 303701.4  | 150350.6  | 214889.2  | 331958.3  | 235470.8  | 304384.1  | 195053    | 265708.6  |



|           |           |           |           |           |           |           |           |           |           |
|-----------|-----------|-----------|-----------|-----------|-----------|-----------|-----------|-----------|-----------|
| LP300.144 |
| 219184.2  | 125722.1  | 284619.4  | 290488    | 243258    | 246918.1  | 153624.1  | 240395.3  | 190152.9  | 216416    |
| 322229.4  | 121547    | 373745.6  | 335084.6  | 258760.6  | 227150.8  | 163151.9  | 262255.9  | 245300.6  | 305338.2  |
| 264636    | 123421.7  | 276533.4  | 242323.4  | 228259.8  | 228143.1  | 152798.4  | 249204.8  | 172535.3  | 236241.8  |
| 244381.6  | 112229.7  | 282262.6  | 292442.4  | 228774.7  | 225761.8  | 146195    | 247399.4  | 186267.8  | 237359.9  |
| 250255    | 119842.2  | 312187.9  | 311015.9  | 242396.3  | 236018.7  | 151858    | 244365.3  | 181557    | 236245    |

|           |           |           |           |           |           |           |           |           |           |
|-----------|-----------|-----------|-----------|-----------|-----------|-----------|-----------|-----------|-----------|
| LP300.144 | LP300.144 | LP300.144 | LP300.144 | LP300.145 | LP300.144 | LP300.144 | LP300.144 | LP300.144 | LP300.144 |
| 295037.3  | 271779.8  | 105099.3  | 181048.8  | 231043.9  | 192565.8  | 237011.1  | 149528.8  | 157276.1  | 116700.3  |
| 308011.7  | 244994.4  | 105182.1  | 174126    | 231709    | 209164.3  | 186974.8  | 127665.7  | 167304.8  | 140402.3  |
| 302972.2  | 269552.9  | 113743.2  | 172835.8  | 231864.7  | 221015.3  | 228978.9  | 146367.9  | 157284.5  | 129847.1  |
| 308946.6  | 272441.8  | 137815.1  | 170129.9  | 244217.2  | 203238.1  | 240441.2  | 155839.5  | 170172.5  | 135198.9  |
| 340249.6  | 272350.4  | 106037.6  | 170797.9  | 249087.9  | 216214.3  | 228168.3  | 153159.8  | 168380.5  | 124293.2  |

|           |           |           |           |           |           |           |           |           |           |
|-----------|-----------|-----------|-----------|-----------|-----------|-----------|-----------|-----------|-----------|
| LP300.144 |
| 103504.2  | 150864.9  | 140521.8  | 211520    | 200104.2  | 146328.8  | 122632.3  | 122163.6  | 76547.8   | 189264.3  |
| 105022    | 154727.4  | 123524.8  | 199555    | 190464.4  | 143482.4  | 127307.2  | 124861.2  | 85552.66  | 231157.8  |
| 93432.59  | 165648.7  | 139529.9  | 199035.6  | 198262    | 146879.3  | 127264.3  | 110653.6  | 83828.13  | 162324.5  |
| 97159.95  | 160699.1  | 147099.6  | 213514.2  | 187572.3  | 139280.7  | 118300.3  | 115872.6  | 80110.8   | 184968.7  |
| 102091.6  | 169963.4  | 142934.8  | 203453.5  | 179669.1  | 145439.3  | 127145.3  | 117418.2  | 85835.8   | 173513.5  |

|           |           |           |           |           |           |          |           |           |           |
|-----------|-----------|-----------|-----------|-----------|-----------|----------|-----------|-----------|-----------|
| LP300.144 | LP300.144 | LP300.180 | LP300.253 | LP300.289 | LP300.290 | LP300.29 | LP300.290 | LP300.290 | LP300.289 |
| 116866.9  | 110321.4  | 22640.86  | 29383.5   | 104738.2  | 46380.79  | 35390.03 | 35697.52  | 67185.11  | 35697.08  |
| 151914.1  | 109462.8  | 22223.31  | 32366.43  | 103163    | 48936.17  | 42885.66 | 39500.86  | 69283.6   | 35898.55  |
| 126276.1  | 117571.5  | 22417.89  | 30130.84  | 109933.4  | 47612.03  | 44612.96 | 35744.62  | 63000.4   | 32736.05  |
| 128249.4  | 115712.7  | 20356.32  | 32388.1   | 112838.1  | 54056.47  | 38085.7  | 39726.1   | 73091.52  | 34977.42  |
| 121007.2  | 100979.5  | 23548.67  | 34745.1   | 117237.7  | 52884.51  | 39013.98 | 40762.18  | 68667.39  | 33022.35  |

|           |           |           |           |           |           |           |           |           |           |
|-----------|-----------|-----------|-----------|-----------|-----------|-----------|-----------|-----------|-----------|
| LP300.290 | LP300.29_ | LP300.29_ | LP300.289 | LP300.289 | LP300.290 | LP300.290 | LP300.290 | LP300.29_ | LP300.290 |
| 32273.47  | 37118.04  | 55852.21  | 53794.01  | 47237.86  | 31414.06  | 32921.54  | 32147.48  | 35612.79  | 46417.65  |
| 30421.55  | 31010.9   | 56517.62  | 53021.96  | 48742.19  | 34276.92  | 33275.71  | 30529.11  | 30517.12  | 44539.31  |
| 32665.01  | 37712.82  | 58027.15  | 58129.26  | 50196.42  | 29633.06  | 34513.76  | 35657.86  | 36673.81  | 47348.12  |
| 32219.54  | 37260.74  | 64785.83  | 61635.71  | 49589.38  | 37587.66  | 40840.94  | 33440.72  | 37496.85  | 49930.24  |
| 36206.42  | 38910.93  | 60048.18  | 55914.23  | 51049.87  | 36956.17  | 38897.77  | 30319.89  | 35711.54  | 47544.09  |

|           |           |           |           |           |           |           |           |           |           |
|-----------|-----------|-----------|-----------|-----------|-----------|-----------|-----------|-----------|-----------|
| LP300.290 | LP300.290 | LP300.290 | LP300.290 | LP300.290 | LP300.29_ | LP300.290 | LP300.290 | LP300.290 | LP300.290 |
| 45797.95  | 45593.07  | 36598.46  | 49471.76  | 42473.38  | 51602.01  | 26266.14  | 41943.98  | 40062.79  | 36645.46  |
| 44613.11  | 49304.32  | 38085.88  | 42346.73  | 39235.21  | 55485.75  | 27316.23  | 35907.04  | 38279.32  | 36956.57  |
| 45846.4   | 44425.62  | 38878.86  | 49097.73  | 42259.22  | 57992.42  | 30742.12  | 40169.93  | 43688.99  | 42880.87  |
| 49796.33  | 52367.79  | 39727.53  | 52036.81  | 42558.7   | 57469.77  | 26281.46  | 40856.7   | 45050.2   | 38796.85  |
| 47694.67  | 52713.04  | 39903.61  | 53607.8   | 46897.69  | 61514.15  | 31808.55  | 43205.19  | 47776.35  | 42819.08  |

|            |            |           |           |           |           |            |           |            |           |
|------------|------------|-----------|-----------|-----------|-----------|------------|-----------|------------|-----------|
| LP300.29_! | LP300.29_! | LP300.290 | LP300.290 | LP300.290 | LP300.290 | LP300.29_! | LP300.290 | LP300.29_! | LP300.290 |
| 51494.3    | 36585      | 43181.31  | 35183.42  | 50956.86  | 28065.43  | 46815.35   | 43214.78  | 53590.8    | 32393.74  |
| 52302.89   | 30007.77   | 46377.3   | 33560.66  | 52138.76  | 25828.72  | 46196.57   | 42233.09  | 53461.66   | 32953.03  |
| 53665.81   | 36930.47   | 42731.88  | 35417.76  | 50026.42  | 30610.44  | 49957.72   | 46565.85  | 56109.14   | 31159.49  |
| 54662.67   | 36076.96   | 47135.34  | 32581.72  | 58374.6   | 28025.02  | 48733.03   | 46974.69  | 60048.81   | 36253.57  |
| 58316.28   | 39687.92   | 49125.75  | 33444.31  | 56804.07  | 31565.17  | 48130.46   | 47699.23  | 59231.28   | 38328.75  |

|           |           |           |           |           |           |          |           |           |           |
|-----------|-----------|-----------|-----------|-----------|-----------|----------|-----------|-----------|-----------|
| LP300.290 | LP300.289 | LP300.290 | LP300.290 | LP300.289 | LP300.290 | LP300.29 | LP300.290 | LP300.290 | LP300.316 |
| 38840.76  | 33358.8   | 44049.36  | 42890.28  | 25714.53  | 43374.55  | 70750.83 | 47637.68  | 52113.6   | 64566.1   |
| 39048.22  | 44096.38  | 45391.57  | 40189.01  | 19764.28  | 40507.23  | 68562.25 | 42318.72  | 47946.45  | 66331     |
| 42557.26  | 40070.33  | 38477.56  | 39916.33  | 23296.69  | 45692.05  | 67235.59 | 46050.43  | 50305.11  | 59793.5   |
| 45753.72  | 39070.91  | 39940.19  | 42758.45  | 25078.1   | 46571.39  | 76718.36 | 50935.22  | 52233.97  | 63454.83  |
| 45621.99  | 43071.81  | 43500.34  | 45015.47  | 25385.83  | 46608.18  | 77801.49 | 48973.1   | 51793.66  | 68277.15  |



|           |           |           |           |           |           |           |           |           |           |
|-----------|-----------|-----------|-----------|-----------|-----------|-----------|-----------|-----------|-----------|
| LP301.141 | LP301.141 | LP301.141 | LP301.140 | LP301.140 | LP301.141 | LP301.141 | LP301.141 | LP301.141 | LP301.141 |
| 1643364   | 2383420   | 1087953   | 2374167   | 2527737   | 1690586   | 2354345   | 5619213   | 1031743   | 2535957   |
| 1280222   | 2983477   | 1191015   | 3733122   | 3121015   | 1402159   | 2404052   | 3821145   | 1454622   | 2653987   |
| 1435314   | 2013767   | 1532326   | 2507905   | 3404418   | 2483833   | 3332710   | 4107381   | 1183594   | 3896853   |
| 1164512   | 3266713   | 1082159   | 3154700   | 2524786   | 1807143   | 2393280   | 5439979   | 1070281   | 2594541   |
| 1400051   | 1928335   | 1220978   | 3326509   | 5054337   | 2092275   | 2017695   | 3576465   | 1037744   | 2752538   |

|           |           |           |           |           |           |           |           |           |           |
|-----------|-----------|-----------|-----------|-----------|-----------|-----------|-----------|-----------|-----------|
| LP301.141 |
| 2388369   | 5088510   | 2829470   | 1885469   | 2629386   | 3071551   | 2962286   | 4396692   | 3364057   | 4172273   |
| 2929167   | 3218443   | 3474895   | 2882186   | 3032158   | 2667507   | 3200313   | 4004302   | 3665127   | 3687301   |
| 3343896   | 3529741   | 3476365   | 4070570   | 2585856   | 1776835   | 3623562   | 4054217   | 3796641   | 3137023   |
| 2979005   | 4178273   | 3346926   | 2807472   | 3868682   | 2385818   | 2271176   | 3933273   | 1591533   | 3103526   |
| 4123838   | 3974030   | 2566696   | 2590153   | 2361319   | 4354962   | 3440271   | 4723360   | 2067064   | 3353481   |

|           |           |           |           |           |           |           |           |           |           |
|-----------|-----------|-----------|-----------|-----------|-----------|-----------|-----------|-----------|-----------|
| LP301.141 |
| 3233346   | 3782213   | 2379390   | 1646112   | 3517838   | 4215257   | 4038935   | 3370171   | 2343839   | 4130889   |
| 4447294   | 5118720   | 1677001   | 2040995   | 6218141   | 4308309   | 5406848   | 3034741   | 2184823   | 3638499   |
| 4205963   | 2310826   | 2434229   | 2599474   | 4735979   | 3369082   | 4061265   | 3058378   | 2656679   | 3409700   |
| 3091010   | 2719044   | 2135393   | 2208923   | 4698694   | 3740074   | 3835760   | 3263891   | 1817404   | 2976258   |
| 4197421   | 4630544   | 2212036   | 2865604   | 4148934   | 4671321   | 4417433   | 3533828   | 1931570   | 2830791   |

|           |           |           |           |           |           |           |           |           |           |
|-----------|-----------|-----------|-----------|-----------|-----------|-----------|-----------|-----------|-----------|
| LP301.141 |
| 3675496   | 4000587   | 3021194   | 3294196   | 2421161   | 3210289   | 3482763   | 1906087   | 4776570   | 3611842   |
| 3495904   | 5666145   | 2925138   | 3252644   | 3276548   | 2995952   | 3549567   | 2267035   | 3606095   | 2479443   |
| 2751721   | 6574479   | 3371526   | 4261442   | 3754981   | 3007545   | 3527646   | 1929178   | 4186545   | 3603230   |
| 3415112   | 2896689   | 2734253   | 3428631   | 2778156   | 3045909   | 4919071   | 2200356   | 3690673   | 3255618   |
| 3000579   | 3552241   | 3485716   | 4821249   | 4430435   | 3420612   | 3956029   | 2995993   | 5065074   | 3474769   |

|           |           |           |           |           |           |           |           |           |           |
|-----------|-----------|-----------|-----------|-----------|-----------|-----------|-----------|-----------|-----------|
| LP301.141 |
| 4215214   | 2428078   | 3363100   | 3079381   | 1666203   | 2644405   | 2704632   | 4068938   | 6445418   | 2922541   |
| 2722990   | 3793855   | 3252449   | 3082007   | 2676327   | 2494185   | 2611999   | 3858924   | 3103801   | 5550211   |
| 3048882   | 3179037   | 2674543   | 2149062   | 1909411   | 3142089   | 2331901   | 4555901   | 5198534   | 4213673   |
| 4279993   | 4408547   | 3030467   | 2947409   | 2234436   | 2551889   | 3169012   | 4025534   | 3964730   | 6349328   |
| 5397952   | 4091256   | 3387936   | 2486306   | 1906133   | 4035100   | 2557630   | 3217298   | 3885257   | 4027624   |

|           |           |           |           |           |           |           |           |           |           |
|-----------|-----------|-----------|-----------|-----------|-----------|-----------|-----------|-----------|-----------|
| LP301.141 |
| 3934038   | 3323815   | 3880014   | 3320788   | 2114212   | 2431786   | 4057341   | 3786226   | 2118158   | 3952218   |
| 3829739   | 3891355   | 4484233   | 2950315   | 2226578   | 2115011   | 2890389   | 2009717   | 2015469   | 4273447   |
| 5358455   | 3952769   | 3463111   | 4776768   | 2366473   | 2798985   | 4184235   | 2969207   | 1878444   | 4068214   |
| 4261380   | 4157452   | 3949862   | 3143703   | 2155084   | 2334374   | 2858089   | 3948310   | 1726985   | 3937511   |
| 3529421   | 4056088   | 3990006   | 5443208   | 1971442   | 1858487   | 4017617   | 3058001   | 1937153   | 4179615   |

|           |           |           |           |           |           |           |           |           |           |
|-----------|-----------|-----------|-----------|-----------|-----------|-----------|-----------|-----------|-----------|
| LP301.141 |
| 4099614   | 2400022   | 2468677   | 2791911   | 1254134   | 1994340   | 3380963   | 2407227   | 1918817   | 3021952   |
| 3866823   | 2293293   | 1805662   | 2039796   | 709636.2  | 1697927   | 2809205   | 2837589   | 2707886   | 4162516   |
| 4157399   | 3027263   | 2556505   | 2304445   | 1201745   | 2013174   | 3060649   | 2375997   | 2989262   | 5078611   |
| 5678718   | 2733408   | 2041743   | 3684169   | 1001084   | 1955023   | 3226385   | 2318648   | 2338751   | 3317784   |
| 3652084   | 2350692   | 2784118   | 2978733   | 1028359   | 2098105   | 3544382   | 3086045   | 2225837   | 2915842   |

|           |           |           |           |           |           |           |           |           |           |
|-----------|-----------|-----------|-----------|-----------|-----------|-----------|-----------|-----------|-----------|
| LP301.141 |
| 2298481   | 1480879   | 2468056   | 1676576   | 2972278   | 2921116   | 737522.7  | 3743244   | 2298617   | 797392.9  |
| 1848340   | 982603.8  | 1605855   | 1888931   | 3248458   | 2850806   | 1252451   | 2366479   | 3084433   | 1150325   |
| 3166990   | 1082270   | 1760078   | 1805073   | 2853636   | 2737345   | 853495.6  | 3187781   | 3032940   | 970032.1  |
| 1693987   | 938577.3  | 1719566   | 1916858   | 2728423   | 3453132   | 696195    | 2257312   | 2146030   | 982502.2  |
| 1751747   | 1126345   | 1715122   | 1973937   | 3775920   | 3320906   | 1176873   | 2667079   | 2715658   | 1229379   |



|           |           |           |           |           |           |           |           |           |           |
|-----------|-----------|-----------|-----------|-----------|-----------|-----------|-----------|-----------|-----------|
| LP301.141 | LP301.141 | LP301.141 | LP301.164 | LP301.164 | LP301.211 | LP301.216 | LP301.293 | LP302.144 | LP302.144 |
| 2725985   | 563261.4  | 717401.4  | 44368.37  | 47240.65  | 166529.5  | 19640.63  | 16134.99  | 153877.8  | 267814.9  |
| 2899924   | 399375.4  | 1189521   | 46507.02  | 51628.16  | 167009.4  | 18210.73  | 25585.94  | 224036.4  | 322433.3  |
| 2921662   | 652292.4  | 932052.4  | 45111.42  | 47335.29  | 154966.1  | 22230.08  | 24861.65  | 212836.6  | 275417.5  |
| 2608572   | 533663.9  | 750193.8  | 49036.72  | 47257.39  | 145645.6  | 20981.52  | 22984.26  | 200937.2  | 420054.2  |
| 2734286   | 631350.6  | 797213.4  | 47367.36  | 47371.94  | 146911    | 22622.82  | 25068.47  | 190723    | 342870.2  |

|           |           |           |           |           |           |           |           |           |           |
|-----------|-----------|-----------|-----------|-----------|-----------|-----------|-----------|-----------|-----------|
| LP302.144 |
| 665535.6  | 432409.6  | 636404.8  | 653311    | 583978.2  | 360362.3  | 729120.2  | 526735.1  | 231599.9  | 534442.1  |
| 697656.8  | 472625.6  | 456117    | 684744.4  | 519178    | 564540.2  | 577388.2  | 697947.3  | 252318.6  | 581350.8  |
| 441785.8  | 506200.9  | 577437.8  | 343387.4  | 570147.4  | 377573.5  | 525598.1  | 583775.9  | 174714    | 645602.1  |
| 434055.3  | 473473.6  | 591805.4  | 392287.9  | 470647.5  | 446231.9  | 492942.1  | 733274.9  | 188641.7  | 660672.2  |
| 768568.2  | 574430.6  | 469114.5  | 635813.8  | 404277.2  | 577353.5  | 523867.6  | 548061.7  | 238845.8  | 722824.6  |

|           |           |           |           |           |           |           |           |           |           |
|-----------|-----------|-----------|-----------|-----------|-----------|-----------|-----------|-----------|-----------|
| LP302.144 |
| 403076.8  | 723020.1  | 577833.4  | 604399.4  | 515791.5  | 812317    | 626694.2  | 719853.7  | 457884.2  | 375068.7  |
| 451252    | 723224.2  | 559209.1  | 456535.2  | 368695.9  | 722171    | 549225.7  | 877194.3  | 536653.5  | 725722    |
| 352606.2  | 586307.9  | 380758.4  | 541673.9  | 487930.1  | 600437.2  | 442832.9  | 818665.4  | 468321.8  | 536994.7  |
| 427603.4  | 619712.4  | 497955.2  | 390083.6  | 354231.3  | 570217    | 552810.4  | 569614.2  | 396034.5  | 327217.6  |
| 364064.3  | 951180.8  | 404896    | 487828.3  | 343682.4  | 738727.2  | 758836.9  | 749800.8  | 595759.2  | 534457    |

|           |           |           |           |           |           |           |           |           |           |
|-----------|-----------|-----------|-----------|-----------|-----------|-----------|-----------|-----------|-----------|
| LP302.144 |
| 417751    | 739025.3  | 539963.7  | 451944    | 840064.3  | 785670.5  | 778894.4  | 312734    | 362869.2  | 647049.8  |
| 532631.6  | 630689.5  | 434819.1  | 471729    | 819821.9  | 495095.4  | 573234.7  | 315391.6  | 265786.8  | 657361.4  |
| 505861.5  | 587850.1  | 554954.1  | 279254.8  | 782539.7  | 677714.5  | 556436.8  | 600620.1  | 372568.4  | 508867.2  |
| 480454.3  | 556725.6  | 428181.5  | 356266.4  | 672135.8  | 450960.4  | 557174.1  | 309691.7  | 456645.3  | 823122.4  |
| 407174.8  | 817482.5  | 524656.9  | 346954.1  | 644846    | 930532.4  | 654672.5  | 276861.3  | 411163.2  | 695720.8  |

|           |           |           |           |           |           |           |           |           |           |
|-----------|-----------|-----------|-----------|-----------|-----------|-----------|-----------|-----------|-----------|
| LP302.144 |
| 875020.6  | 558915.3  | 858950.8  | 522444.8  | 316551.3  | 505648.9  | 453997.5  | 573289.8  | 454376.7  | 506474    |
| 686383    | 656287.1  | 844645.3  | 428551.4  | 426555.1  | 602271.9  | 351679.4  | 612678.7  | 402162.6  | 487619    |
| 559656.3  | 503846.1  | 673599.2  | 457498.6  | 281740.9  | 864926    | 384751.9  | 739949.4  | 455898.7  | 695699.2  |
| 793773.3  | 593132    | 736034.9  | 391473.7  | 317123.1  | 624047.1  | 356149.2  | 546343    | 381878.3  | 734045.4  |
| 795340    | 513856.1  | 537842.7  | 442880.4  | 373677.6  | 561937.9  | 424665.8  | 654142.9  | 303305.5  | 779499.7  |

|           |           |           |           |           |           |           |           |           |           |
|-----------|-----------|-----------|-----------|-----------|-----------|-----------|-----------|-----------|-----------|
| LP302.144 |
| 707826.4  | 723327.6  | 305188.6  | 405773.9  | 321587    | 520991.7  | 441511.1  | 167907.9  | 290451.9  | 510989.9  |
| 547222.5  | 386789.5  | 320314.8  | 370774    | 476067.8  | 442125.9  | 411010    | 207850.1  | 453259    | 386297.4  |
| 643133.3  | 432822.4  | 508614.1  | 349265.9  | 404901.2  | 393237.7  | 429852.4  | 144548.4  | 363792.6  | 389251.3  |
| 578665.2  | 475029.7  | 376662.4  | 319261.3  | 439395.8  | 382561.2  | 517491.1  | 175565.6  | 322160.8  | 410702.5  |
| 539453    | 516808.7  | 359809.8  | 424141.3  | 334021    | 487866.4  | 334972.9  | 166237.1  | 391895.7  | 608722.4  |

|           |           |           |           |           |           |           |           |           |           |
|-----------|-----------|-----------|-----------|-----------|-----------|-----------|-----------|-----------|-----------|
| LP302.144 |
| 477539    | 665974.8  | 423267.3  | 537040.5  | 598099.2  | 947499.9  | 610702.1  | 685444.9  | 457948.4  | 192722    |
| 324336    | 644332.1  | 449930.7  | 717345.7  | 642873.6  | 690629    | 709743.5  | 577357.1  | 577145.3  | 181613    |
| 384810.9  | 479038.4  | 496101.7  | 501385.6  | 554200.8  | 746503.9  | 740253.4  | 829825.3  | 380200    | 223362.1  |
| 414124    | 751641    | 510572.3  | 714382.4  | 730625.8  | 646777.2  | 835911.3  | 803520.3  | 519702    | 204650.5  |
| 411188.2  | 710538.1  | 480938.6  | 587619.3  | 773819.5  | 623920.6  | 584168.1  | 604845.6  | 368011.5  | 229737.6  |

|           |           |           |           |           |           |           |           |           |           |
|-----------|-----------|-----------|-----------|-----------|-----------|-----------|-----------|-----------|-----------|
| LP302.144 |
| 226082    | 781850.3  | 589570.3  | 684121.6  | 581275.2  | 344404    | 505985.5  | 753163.6  | 259026.8  | 561583    |
| 205134.8  | 810053.2  | 510666.7  | 823055    | 476340.1  | 379590.8  | 622976.6  | 517399.9  | 392939.2  | 566564.1  |
| 138216.8  | 780556.5  | 453385.6  | 667918.5  | 397536.9  | 327417.3  | 693669.4  | 421688.7  | 261835.6  | 752711.7  |
| 203059.5  | 670867.8  | 578876.1  | 705997.4  | 534554.6  | 393037.3  | 523845.8  | 527262.1  | 321081.7  | 639780.5  |
| 178836.3  | 519502.9  | 554238.8  | 753293    | 735169    | 438245.5  | 660822.3  | 633387    | 330166.9  | 603378.2  |



|           |           |           |           |           |           |           |           |           |           |
|-----------|-----------|-----------|-----------|-----------|-----------|-----------|-----------|-----------|-----------|
| LP302.144 |
| 573593.4  | 507551.6  | 801665.1  | 122076.2  | 129116    | 520529.3  | 142357.4  | 448075.9  | 149082.1  | 476015.9  |
| 572171.9  | 375232.5  | 583304    | 101556.5  | 139663.7  | 493195.7  | 128344.4  | 471356.2  | 180904.1  | 476282.8  |
| 686294    | 394861.7  | 617729.9  | 132095.4  | 193337    | 534971.3  | 138546.3  | 418250.3  | 164845.8  | 692970.2  |
| 558465.8  | 489364.9  | 662862.4  | 129316.8  | 157247.1  | 721097.7  | 122072.3  | 437164.6  | 135454.3  | 499898.1  |
| 506310.7  | 553548.3  | 605879.9  | 123101.9  | 134554.3  | 518678.2  | 109282.7  | 531791.9  | 165886.1  | 833823.4  |

|           |           |           |           |           |           |           |           |           |           |
|-----------|-----------|-----------|-----------|-----------|-----------|-----------|-----------|-----------|-----------|
| LP302.144 | LP302.144 | LP302.196 | LP302.196 | LP302.195 | LP302.196 | LP302.196 | LP302.196 | LP302.195 | LP302.196 |
| 176594.7  | 122915.3  | 39405.46  | 37558.1   | 39387.97  | 47283.44  | 33730.18  | 48530.17  | 33095.48  | 44877.76  |
| 175519.7  | 129791.9  | 43500.22  | 38404.76  | 43195.42  | 40054.55  | 35862.07  | 48581.12  | 35951.18  | 40554.11  |
| 146305.9  | 119132.5  | 42065.74  | 34041.54  | 41135.46  | 39216.5   | 34358.58  | 43172.51  | 31837.13  | 45891.81  |
| 172673.4  | 102471.1  | 47900.15  | 37065.09  | 43204.22  | 44875.17  | 38303.57  | 42888.61  | 32374.78  | 43464.69  |
| 172684.4  | 155426.1  | 39388.52  | 32799.35  | 35148.16  | 36854.5   | 35657.57  | 41831.11  | 30011.54  | 45475.7   |

|           |           |           |           |           |           |           |           |           |           |
|-----------|-----------|-----------|-----------|-----------|-----------|-----------|-----------|-----------|-----------|
| LP302.196 | LP302.214 | LP302.232 | LP302.232 | LP302.305 | LP302.305 | LP303.144 | LP303.143 | LP303.144 | LP303.144 |
| 39338.53  | 24673.74  | 36348.3   | 45425.9   | 37684.57  | 36978.44  | 51903.67  | 50184.29  | 37189.45  | 48055.22  |
| 35758.53  | 49436.26  | 37455.71  | 44847.83  | 40305.96  | 51879.83  | 50218.23  | 49233.74  | 45792.45  | 51071.62  |
| 37495.74  | 51856.41  | 34186.1   | 45194.29  | 43878.61  | 52784.46  | 46054.93  | 49182.75  | 41804.97  | 43182.32  |
| 40473.99  | 25640.26  | 31950.1   | 41969.74  | 27414.45  | 62052.55  | 53521.73  | 51811.83  | 43470.85  | 46754.77  |
| 35857.57  | 28091.71  | 30719.91  | 41919.66  | 35288.89  | 48703.26  | 46263.04  | 54324.46  | 40185.71  | 49521.21  |

|           |           |           |           |           |           |           |           |           |           |
|-----------|-----------|-----------|-----------|-----------|-----------|-----------|-----------|-----------|-----------|
| LP303.143 | LP303.142 | LP303.143 | LP303.144 |
| 54567.56  | 69489.67  | 67485.88  | 52788.84  | 47353.94  | 43670.64  | 58228.99  | 55326.32  | 49940.9   | 50377.04  |
| 51010.22  | 57627.11  | 63924.98  | 56031.35  | 46485.06  | 38585.89  | 54821.53  | 45909.29  | 49376.13  | 49473.67  |
| 62632.78  | 58841.83  | 64704.11  | 51861.42  | 47814.35  | 39833.49  | 53619.76  | 53764.12  | 46132.67  | 52385.42  |
| 53289.85  | 56899.76  | 54933.69  | 54943.56  | 41780.6   | 39280.5   | 49251.7   | 51634.86  | 46781.31  | 50887.98  |
| 58568.63  | 49678.61  | 51212.39  | 49530.75  | 42155.79  | 32313.56  | 46440.08  | 50714.79  | 49333.55  | 48448.11  |

|           |           |           |           |           |           |           |           |           |           |
|-----------|-----------|-----------|-----------|-----------|-----------|-----------|-----------|-----------|-----------|
| LP303.144 | LP303.145 |
| 44125.18  | 53592.04  | 45713.09  | 48496.89  | 50664.22  | 49809.86  | 46467.47  | 34840.23  | 42682.58  | 30485.64  |
| 45544.99  | 47408.42  | 43297.77  | 49718.97  | 53257.14  | 48778.34  | 53963.28  | 36118.05  | 40738.74  | 36510.41  |
| 42622.55  | 52888.87  | 50182.89  | 52749.39  | 51845.07  | 50230.23  | 52497.14  | 37906.62  | 42044.83  | 33686.36  |
| 45219.86  | 55891.92  | 41953.4   | 59424.47  | 54056.43  | 58052.54  | 43693.79  | 33622.54  | 41793.61  | 32792.34  |
| 40882.45  | 50236.62  | 50447.57  | 58701.18  | 49384.43  | 55995.96  | 55142.61  | 38449.59  | 38580.46  | 28583.93  |

|           |           |           |           |           |           |           |           |           |           |
|-----------|-----------|-----------|-----------|-----------|-----------|-----------|-----------|-----------|-----------|
| LP303.144 | LP303.145 | LP303.144 | LP303.144 | LP303.145 | LP303.144 | LP303.145 | LP303.144 | LP303.147 | LP303.144 |
| 40371.08  | 47968.37  | 40801.17  | 39336.94  | 44258.11  | 47570.33  | 41130.73  | 25096.67  | 13535.81  | 39981.15  |
| 38380.83  | 43726     | 40426.37  | 42379.31  | 43049.17  | 48467.31  | 38277.13  | 32205.29  | 13334.39  | 48737.95  |
| 37512.4   | 47530.62  | 44828.56  | 46640.54  | 44665.82  | 46991.04  | 42016.05  | 32298.81  | 12377.65  | 50672.98  |
| 42755.22  | 47260.09  | 47846.64  | 43844.6   | 44040.05  | 42521.34  | 41274.36  | 29020.72  | 9829.6    | 46091.01  |
| 39172.13  | 45969.42  | 40440.13  | 49013.04  | 47414.51  | 46837.04  | 42951.15  | 31536.22  | 10896.25  | 50050.68  |

|           |           |           |           |           |           |           |           |           |           |
|-----------|-----------|-----------|-----------|-----------|-----------|-----------|-----------|-----------|-----------|
| LP303.143 | LP303.180 | LP303.253 | LP303.253 | LP303.253 | LP303.253 | LP303.289 | LP303.304 | LP304.211 | LP304.211 |
| 42474.49  | 25460.95  | 13266.47  | 25265.62  | 32251.88  | 29927     | 69882.69  | 24347.36  | 189936.2  | 179286.9  |
| 42678     | 27365.89  | 13034.49  | 23668.88  | 30977.61  | 26764.54  | 59943.96  | 22066.28  | 189313.9  | 175999.7  |
| 38368.2   | 36146.46  | 11640.48  | 22056.89  | 35041.61  | 27004.55  | 62613.51  | 25522.61  | 193585.5  | 176538.1  |
| 41475.82  | 40771.98  | 13945.5   | 24783.49  | 31693.3   | 26789.18  | 84662.79  | 17900.7   | 206667.4  | 198807.6  |
| 41533.44  | 45333.74  | 16878.15  | 26002.08  | 34140.08  | 26441.56  | 72866.53  | 18034.87  | 125100.2  | 210155.8  |

|            |           |           |            |            |           |           |           |           |           |
|------------|-----------|-----------|------------|------------|-----------|-----------|-----------|-----------|-----------|
| LP304.211' | LP304.212 | LP304.212 | LP304.247' | LP304.247' | LP304.248 | LP304.248 | LP304.248 | LP304.248 | LP304.248 |
| 149087.9   | 139336.2  | 184248.5  | 124628.1   | 107336.9   | 185370.9  | 105312.2  | 119262.7  | 126667.6  | 134512.1  |
| 136967.5   | 143901.5  | 178239.1  | 118620     | 110470.3   | 180526.8  | 87923.38  | 126432.4  | 120935.3  | 126101.5  |
| 153367.3   | 142889.7  | 189232.1  | 115595.9   | 118152.3   | 163926    | 104935.2  | 119332.2  | 128442.8  | 134232.8  |
| 165652.9   | 164022.5  | 192783    | 128712.5   | 124163.3   | 187259    | 106512.6  | 127535.9  | 128828.6  | 142198.2  |
| 186911.2   | 80201.97  | 218990.5  | 146567.7   | 135498.1   | 186810.2  | 131021.4  | 147032.6  | 156072.1  | 153753.6  |



|           |           |           |           |           |           |           |           |           |           |
|-----------|-----------|-----------|-----------|-----------|-----------|-----------|-----------|-----------|-----------|
| LP304.248 |
| 121793.1  | 143436    | 114819.2  | 120134.6  | 101009.6  | 168356.5  | 125710    | 138214.3  | 89665     | 86856.26  |
| 128788.2  | 141571.3  | 118642.5  | 113471    | 92924.58  | 166653    | 107538.5  | 131105.9  | 86123.95  | 88256.68  |
| 127955.6  | 139372    | 117397.7  | 127096.9  | 101683.3  | 171142.3  | 114903.3  | 120972.2  | 91606.82  | 84325.72  |
| 131172.8  | 144621.8  | 124828.4  | 117904.7  | 95377.01  | 171298.5  | 116306.6  | 144676.7  | 96222.13  | 83812.93  |
| 148208.6  | 154098.2  | 132748.9  | 156772.3  | 107369.5  | 200617.1  | 128898.8  | 151881.5  | 102036.5  | 95335.43  |

|           |           |           |           |           |           |           |           |           |           |
|-----------|-----------|-----------|-----------|-----------|-----------|-----------|-----------|-----------|-----------|
| LP304.248 |
| 105328.7  | 117275.2  | 102551.8  | 169492.3  | 144079.5  | 100604.5  | 150030.3  | 105427.2  | 139663    | 139594.7  |
| 104947    | 109219.5  | 105423.2  | 160607.7  | 153928.6  | 98874.39  | 136591.7  | 101430.1  | 133336.8  | 133221    |
| 107565.7  | 97850.35  | 101025.8  | 163362.8  | 147664.1  | 96243.98  | 137285.1  | 103298.3  | 131585.1  | 133906.4  |
| 101088.2  | 109128.8  | 106154.5  | 162107.4  | 141474.9  | 103752.8  | 143029.4  | 108475.8  | 134561.8  | 140111.7  |
| 112907.6  | 123699.6  | 120310.9  | 191669.5  | 182277    | 99722.82  | 160466.1  | 121330.7  | 150464.9  | 152743.6  |

|           |           |           |           |           |           |           |           |           |           |
|-----------|-----------|-----------|-----------|-----------|-----------|-----------|-----------|-----------|-----------|
| LP304.248 | LP304.247 | LP304.248 |
| 116319.8  | 153641.4  | 145146.3  | 163281.3  | 126360.2  | 122368.4  | 143837    | 120163.6  | 112444.7  | 118367.8  |
| 123203.6  | 126814.5  | 148085.5  | 169424.2  | 122254.3  | 118407    | 133493    | 127966.7  | 114686.6  | 129933.6  |
| 103783.5  | 141345    | 146915    | 172984.8  | 121764.1  | 120295.7  | 141724.8  | 110752.3  | 107771    | 125071.1  |
| 109294.6  | 144644.4  | 154166.1  | 169867.9  | 133481.5  | 120948.8  | 149474.6  | 130162.6  | 104726.5  | 131396.1  |
| 122751.3  | 166341.2  | 154169.1  | 197862.7  | 157777.9  | 146563.2  | 166154.3  | 146419    | 124211.7  | 157185.4  |

|           |           |           |           |           |           |           |           |           |           |
|-----------|-----------|-----------|-----------|-----------|-----------|-----------|-----------|-----------|-----------|
| LP304.248 |
| 147494.9  | 141926.1  | 129585    | 102494.1  | 158897    | 116076.2  | 175165.2  | 122932.6  | 173559.4  | 137982.7  |
| 155471.8  | 140590.3  | 131065.6  | 98632.06  | 155891.4  | 127303    | 182908.7  | 125165    | 148277    | 124837.2  |
| 152341.9  | 148135.3  | 135547.7  | 98827.33  | 154601.9  | 112112.4  | 180039.2  | 116196    | 154286.8  | 122507.3  |
| 161939.7  | 147015.3  | 122964.9  | 99573.81  | 157224    | 128625.1  | 193367.1  | 129984.7  | 165774.8  | 121403.3  |
| 176899.5  | 163727.4  | 161013    | 104772.1  | 173088.8  | 147846.3  | 216408.3  | 129724.6  | 181401.4  | 139518.3  |

|           |           |           |           |           |           |           |           |           |           |
|-----------|-----------|-----------|-----------|-----------|-----------|-----------|-----------|-----------|-----------|
| LP304.248 |
| 124498.7  | 160434.2  | 143200.5  | 145538.4  | 122298.1  | 119920    | 157656    | 116802.1  | 103111.3  | 97049.4   |
| 134189.6  | 153782.9  | 145499    | 130445.6  | 108871.4  | 130700.5  | 142741.6  | 114694.1  | 91083.58  | 94014.55  |
| 131204.6  | 150629.5  | 149491.2  | 141427.9  | 115137.2  | 123851.7  | 120396.9  | 115055.6  | 94934.88  | 95041.29  |
| 132474.6  | 171821.3  | 148246.4  | 155953.5  | 127042.1  | 137407.5  | 165477.9  | 131239.4  | 98858.33  | 108310.5  |
| 159409.8  | 178912.4  | 179894.8  | 185493.3  | 136470.5  | 154274.8  | 180251.6  | 148558.9  | 124066.3  | 108612    |

|           |           |           |           |           |           |           |           |           |           |
|-----------|-----------|-----------|-----------|-----------|-----------|-----------|-----------|-----------|-----------|
| LP304.248 |
| 112506.7  | 83342.12  | 96182.93  | 121332.5  | 99215.63  | 116260    | 89473.5   | 185137.9  | 104567.8  | 147402.8  |
| 117640.5  | 81770.48  | 90364.85  | 122734.9  | 104405    | 114275.3  | 87165.87  | 183804.7  | 101986.5  | 140871.8  |
| 122926    | 87360.53  | 94979.21  | 124330.5  | 101541.9  | 118394.6  | 88607.79  | 177072.6  | 94044.16  | 139381.6  |
| 132391.9  | 84570.43  | 105197.3  | 134560.2  | 109457.7  | 119474.1  | 89273.04  | 195059.5  | 98928.43  | 144431.9  |
| 139631.8  | 114892.4  | 113023.3  | 160887.7  | 121707    | 135944.1  | 119801.5  | 218929    | 126958.5  | 169210.7  |

|           |           |           |           |           |           |           |           |           |           |
|-----------|-----------|-----------|-----------|-----------|-----------|-----------|-----------|-----------|-----------|
| LP304.248 | LP304.248 | LP304.292 | LP304.300 | LP304.299 | LP304.894 | LP304.894 | LP305.174 | LP305.247 | LP305.247 |
| 175868.4  | 171214.4  | 11035.24  | 50410.75  | 18194     | 79230.94  | 61019.23  | 16568.43  | 41396.91  | 48676.32  |
| 181123.6  | 168112.2  | 14558.12  | 57579.91  | 16802.77  | 79650.95  | 59244.81  | 14226.58  | 35700.5   | 46948.78  |
| 173719.7  | 164506.6  | 15801.61  | 56734.92  | 16041.85  | 82826.67  | 78895.08  | 18385.04  | 46687.99  | 41295.72  |
| 177357.4  | 157988.7  | 9997.8    | 65819.89  | 13634.96  | 89899.52  | 77349.84  | 16818.79  | 42936.04  | 43818.42  |
| 201168.5  | 193098.3  | 13308.63  | 63326.37  | 17045.1   | 71100.77  | 60294.31  | 16579.29  | 40305.73  | 51770.3   |

|           |           |           |           |           |           |           |           |           |           |
|-----------|-----------|-----------|-----------|-----------|-----------|-----------|-----------|-----------|-----------|
| LP305.247 | LP305.247 | LP305.295 | LP305.899 | LP306.155 | LP306.155 | LP306.155 | LP306.191 | LP306.191 | LP306.191 |
| 34231.52  | 41278.35  | 12504.16  | 31760.44  | 75398.14  | 80452.47  | 96422.95  | 73291.06  | 122325.1  | 101921.2  |
| 34803.19  | 43937.43  | 11799.72  | 25714.24  | 82807.84  | 73758.93  | 108243.6  | 68789.5   | 128305.6  | 99907.86  |
| 32488.74  | 43120.95  | 15928.63  | 45083.7   | 72974.53  | 78973.33  | 92453.72  | 68774.43  | 109759.5  | 108751    |
| 30195.45  | 41589.63  | 18817.2   | 60893.41  | 77600.68  | 72647.11  | 100080.3  | 79674.11  | 115264    | 108609.5  |
| 31794.58  | 41231.55  | 17364.79  | 24160.15  | 79183.36  | 79361.44  | 86497.01  | 76051.11  | 107863.6  | 103979.4  |



|           |           |           |           |           |           |           |           |           |           |
|-----------|-----------|-----------|-----------|-----------|-----------|-----------|-----------|-----------|-----------|
| LP306.191 | LP306.191 | LP306.190 | LP306.191 | LP306.191 | LP306.191 | LP306.191 | LP306.191 | LP306.190 | LP306.190 |
| 44727.91  | 60093.11  | 80578.2   | 84610.32  | 69968.64  | 88228.15  | 112926.6  | 108342.5  | 68889.67  | 57488.14  |
| 57497.58  | 58726.72  | 86346.9   | 84982.28  | 62665.5   | 85407.45  | 113039.7  | 108100.4  | 79898.85  | 66702.37  |
| 54797.82  | 55977.13  | 85433.31  | 80912.36  | 65454.54  | 79527.99  | 115981.6  | 99692.18  | 68331.74  | 56256.98  |
| 51888.05  | 61838.24  | 89535.36  | 81700.09  | 60391.05  | 88205.71  | 117860.7  | 117064    | 70222.78  | 57559.14  |
| 53943.92  | 52937.57  | 82061.27  | 100603.1  | 80848.38  | 77929.56  | 104843.4  | 99183.19  | 66837.06  | 54098.04  |

|           |           |           |           |           |           |           |           |          |           |
|-----------|-----------|-----------|-----------|-----------|-----------|-----------|-----------|----------|-----------|
| LP306.191 | LP306.191 | LP306.191 | LP306.191 | LP306.191 | LP306.190 | LP306.276 | LP307.190 | LP307.19 | LP307.190 |
| 57035.89  | 62924.72  | 97529.21  | 85232.13  | 58846.26  | 105964.7  | 40792.9   | 33804.54  | 37260.41 | 35244.8   |
| 63340.65  | 62549.75  | 106854.3  | 84836.66  | 66814.48  | 115717.1  | 44341.58  | 37801.99  | 37045.53 | 33331.83  |
| 58679.74  | 70483.43  | 100956.8  | 82850.87  | 66188.6   | 121120.6  | 58668.25  | 29233.55  | 42717.02 | 35051.98  |
| 60491.41  | 65313.9   | 101174.5  | 88089.86  | 64816.33  | 110289.2  | 62038.1   | 36165.67  | 43432.91 | 38989.95  |
| 54395.03  | 59686.31  | 104462.5  | 83163.9   | 78792.66  | 114075.8  | 68873.15  | 35263.86  | 41177.46 | 35981.15  |

|           |           |           |           |           |           |           |           |           |           |
|-----------|-----------|-----------|-----------|-----------|-----------|-----------|-----------|-----------|-----------|
| LP307.190 | LP307.189 | LP307.226 | LP307.226 | LP307.226 | LP307.263 | LP307.263 | LP307.263 | LP307.263 | LP307.263 |
| 41056.13  | 48356.61  | 27665.16  | 33346.07  | 40015.08  | 49627.44  | 30304.54  | 53860.29  | 38289.88  | 46069.93  |
| 40309.97  | 38878.35  | 37471.26  | 39185.78  | 36010.72  | 58789.85  | 38882.81  | 50226.81  | 41011.63  | 50013.24  |
| 37364.45  | 41507.59  | 41589.72  | 35717.76  | 39630.54  | 50114.18  | 28821.18  | 45157.63  | 35287.28  | 50214.56  |
| 35359.54  | 38277.3   | 38086.1   | 35521.27  | 35345.18  | 47375.36  | 29959.12  | 54189.34  | 39028.38  | 43680.46  |
| 33810.98  | 44500.61  | 35791.23  | 35346.83  | 42770.53  | 47636.16  | 33392.26  | 53491.56  | 39166.78  | 42372.9   |

|           |           |           |           |           |           |           |           |           |           |
|-----------|-----------|-----------|-----------|-----------|-----------|-----------|-----------|-----------|-----------|
| LP307.280 | LP307.310 | LP308.206 | LP308.207 | LP308.206 | LP308.206 | LP308.206 | LP308.206 | LP308.206 | LP308.207 |
| 37517.89  | 23777.16  | 45733.13  | 80264.91  | 51636.89  | 55477.05  | 38734.81  | 32543.61  | 53186.39  | 66030.52  |
| 33517.74  | 24245.39  | 44000.98  | 79222.23  | 48584.86  | 65300.47  | 40267.14  | 33053.46  | 54760.44  | 66069.75  |
| 37403.27  | 23298.49  | 46550.52  | 85943.69  | 59304.22  | 49074.24  | 36877.91  | 29967.55  | 52462.41  | 72807.43  |
| 29003.84  | 24334.07  | 44814.7   | 86005.32  | 50380.26  | 49036.2   | 39995.73  | 30197.33  | 56442.5   | 66308.63  |
| 34878.34  | 24010.51  | 48020.88  | 80138.75  | 48461.16  | 55956.09  | 36455.99  | 27121.65  | 51404.19  | 56266.32  |

|           |           |           |           |           |           |           |           |           |           |
|-----------|-----------|-----------|-----------|-----------|-----------|-----------|-----------|-----------|-----------|
| LP308.206 | LP308.206 | LP308.207 | LP308.207 | LP308.206 | LP308.206 | LP308.279 | LP308.295 | LP309.168 | LP309.168 |
| 39950.56  | 43320.24  | 61109.17  | 51424.15  | 57746.6   | 40147.95  | 30388.58  | 26907.34  | 67126.05  | 78439.31  |
| 42343.77  | 41788.28  | 66514.5   | 51606.91  | 53959.5   | 41184.03  | 29231.38  | 22993.59  | 66655.63  | 62256.34  |
| 39187.48  | 39054.89  | 76851.73  | 54860.38  | 59265.48  | 40631.54  | 29507.19  | 20405.44  | 68315.03  | 58732.14  |
| 41947.87  | 40409.56  | 77428.15  | 47803.98  | 59770.01  | 38866.1   | 26231.73  | 8973.647  | 64108.54  | 56228.71  |
| 39730.34  | 40205.31  | 64999.09  | 47527.16  | 46639.48  | 41012.19  | 28403.15  | 18661.7   | 66674.71  | 57284.85  |

|           |           |           |           |           |           |           |           |           |           |
|-----------|-----------|-----------|-----------|-----------|-----------|-----------|-----------|-----------|-----------|
| LP309.168 | LP309.168 | LP309.168 | LP309.167 | LP309.168 | LP309.168 | LP309.168 | LP309.168 | LP309.168 | LP309.168 |
| 67403.24  | 58199.61  | 74814.67  | 57360.14  | 64417.28  | 72838.89  | 62587.17  | 86958.47  | 57710.65  | 73518.43  |
| 72375.03  | 52164.59  | 73229.87  | 59494.3   | 59243.61  | 75223.64  | 62558.92  | 58441.03  | 55297.32  | 68751.45  |
| 60356.09  | 53213.42  | 70712.79  | 66324.58  | 60727.28  | 76612.85  | 61881.77  | 62736.5   | 59911.78  | 68707.67  |
| 70854.42  | 49191.11  | 69507.69  | 58469.09  | 65971.6   | 75296.6   | 63932.39  | 59638.23  | 59917.54  | 65119.83  |
| 69215.76  | 52744.03  | 62859.3   | 60265.03  | 67112.61  | 77408.79  | 57668.26  | 62563.45  | 63280.61  | 65493.64  |

|           |           |           |           |           |           |           |           |           |           |
|-----------|-----------|-----------|-----------|-----------|-----------|-----------|-----------|-----------|-----------|
| LP309.168 | LP309.168 | LP309.168 | LP309.168 | LP309.167 | LP309.168 | LP309.168 | LP309.168 | LP309.168 | LP309.168 |
| 75983.02  | 74902.24  | 68889.02  | 49892.71  | 67493.04  | 52675.31  | 64894.62  | 65773.65  | 63415.58  | 60036.02  |
| 68612.57  | 79700.87  | 65180.16  | 54389.55  | 69829     | 51229.61  | 69370.73  | 63875.58  | 64513.16  | 62257.76  |
| 69391.21  | 78104.26  | 70900.18  | 56898.77  | 80626.13  | 57440.78  | 62108.7   | 66874.47  | 61941.33  | 69727.52  |
| 102656.6  | 79835.04  | 71656.7   | 68191.97  | 75089.04  | 53242.85  | 62682.71  | 64938.91  | 57935.51  | 70632.37  |
| 67077.2   | 74294.96  | 71066.03  | 56419.26  | 67671.19  | 45460.6   | 69033.2   | 67640.8   | 67080.12  | 61794.67  |

|           |           |           |           |           |           |           |           |           |           |
|-----------|-----------|-----------|-----------|-----------|-----------|-----------|-----------|-----------|-----------|
| LP309.168 |
| 67581.79  | 67102.02  | 70862.74  | 70313.57  | 59522.72  | 73752.49  | 69031.74  | 69277.17  | 59790.78  | 55725.92  |
| 68134.29  | 73236.39  | 69694.14  | 66730.82  | 53358.17  | 78446.12  | 71116.7   | 63856.33  | 63693.12  | 46538.07  |
| 71239.22  | 73414.51  | 76491.65  | 67338.11  | 57816.99  | 72648.9   | 71020.08  | 72147.35  | 65901.95  | 49799.56  |
| 65868.56  | 70521.13  | 61506.49  | 68467.62  | 54373.93  | 77605.73  | 63117.57  | 66968.79  | 66822     | 46786.22  |
| 67145.81  | 68268.62  | 73519.23  | 65762.48  | 50916.33  | 78281.16  | 66680.84  | 61251.49  | 59042.4   | 46636.88  |



|           |           |           |           |           |           |           |           |           |           |
|-----------|-----------|-----------|-----------|-----------|-----------|-----------|-----------|-----------|-----------|
| LP309.168 | LP309.168 | LP309.168 | LP309.168 | LP309.168 | LP309.168 | LP309.167 | LP309.168 | LP309.169 | LP309.168 |
| 77058.06  | 67144.65  | 56178.22  | 73933.18  | 97398.63  | 69001.84  | 69814.73  | 76247.48  | 63386.49  | 49946.98  |
| 74297.53  | 65640.24  | 59168.11  | 67888.58  | 86257.42  | 65202.69  | 67854.98  | 79252.97  | 62581.8   | 48907.77  |
| 79162.81  | 58984.49  | 64148.2   | 74888.14  | 90848.61  | 65839.2   | 69443.01  | 83095.02  | 66602.38  | 52596.73  |
| 81214.99  | 59352.96  | 68388.51  | 82033.39  | 86644.53  | 67921.53  | 67753.87  | 85030.06  | 63311.06  | 58692.67  |
| 66869.75  | 63151.24  | 54076.53  | 66158.07  | 88655.94  | 67989.95  | 62064.75  | 84009.06  | 61802.64  | 46015.69  |

|           |           |           |           |           |           |           |           |           |           |
|-----------|-----------|-----------|-----------|-----------|-----------|-----------|-----------|-----------|-----------|
| LP309.168 |
| 72744.86  | 76414.48  | 74612.38  | 98737.96  | 42047.09  | 50231.29  | 51037.5   | 73404.68  | 57534.98  | 64221.41  |
| 74254.25  | 77115.43  | 74826.72  | 96172.53  | 44002.37  | 56615.91  | 60938.85  | 64068.82  | 54979.01  | 58521.96  |
| 72072.09  | 68843.25  | 77778.15  | 98161.79  | 48210.71  | 56056.82  | 59466.41  | 65846.2   | 61039.66  | 61970.98  |
| 77278.33  | 72409.51  | 77856.6   | 100011.4  | 40437.39  | 50427.02  | 49134.76  | 70110.43  | 67346.06  | 62038.61  |
| 67806.65  | 74050.5   | 79859.28  | 92230.89  | 43251.2   | 47965.63  | 54988.76  | 67832.27  | 54166.5   | 54397.06  |

|           |           |           |           |           |           |           |           |           |           |
|-----------|-----------|-----------|-----------|-----------|-----------|-----------|-----------|-----------|-----------|
| LP309.168 | LP309.168 | LP309.167 | LP309.168 | LP309.168 | LP309.204 | LP309.205 | LP309.205 | LP309.205 | LP309.205 |
| 56428.79  | 50701.02  | 47883.31  | 79805.6   | 81742.04  | 53549.5   | 63684.46  | 55764.3   | 67466.53  | 72842.47  |
| 61912.17  | 46789.76  | 45768.45  | 72408.84  | 78375.22  | 53654.56  | 66031.42  | 57793     | 61586.72  | 70849.7   |
| 61359.41  | 48006.35  | 48164.59  | 75990.42  | 78383.34  | 59014.97  | 66879.2   | 54940.85  | 64812.94  | 64944.92  |
| 59577.58  | 48011.8   | 53127.31  | 75787.69  | 86000.1   | 63556.02  | 63223.15  | 55730.02  | 65492.17  | 63135.32  |
| 62850.61  | 48312.04  | 44887.44  | 74884.34  | 80756.85  | 50504.64  | 62735.23  | 54973.35  | 75326.15  | 58170.3   |

|           |           |           |           |           |           |           |           |           |           |
|-----------|-----------|-----------|-----------|-----------|-----------|-----------|-----------|-----------|-----------|
| LP309.205 | LP309.205 | LP309.205 | LP309.205 | LP309.205 | LP309.205 | LP309.204 | LP309.205 | LP309.205 | LP309.205 |
| 69249.36  | 61880.2   | 46292.97  | 51484.99  | 47330.21  | 53924.32  | 70385.46  | 63019.79  | 71690.77  | 56309.93  |
| 57010.74  | 46687.12  | 52262.27  | 72423.31  | 47610.94  | 44907.6   | 39325.1   | 57006.86  | 67131.59  | 54830.31  |
| 68934.86  | 56857.06  | 51809.39  | 50892.4   | 45028.48  | 53858.32  | 62841.7   | 57366.57  | 66249.76  | 60077.89  |
| 65956.13  | 57385.67  | 54509.31  | 48936.41  | 41089.96  | 50752.98  | 63478.66  | 55044.52  | 60849.07  | 57405.86  |
| 69697.58  | 57183.63  | 53419.56  | 53221.45  | 45504.7   | 45786.37  | 61038.29  | 58898.18  | 68927.93  | 59495.7   |

|           |           |           |           |           |           |           |           |           |           |
|-----------|-----------|-----------|-----------|-----------|-----------|-----------|-----------|-----------|-----------|
| LP309.205 |
| 78121.74  | 58736.27  | 81960.17  | 86314.49  | 64442.08  | 71033.93  | 62522.41  | 74672.87  | 49649.83  | 82007.82  |
| 85808.14  | 52424.33  | 80287.86  | 82681.34  | 66666.56  | 62402.69  | 59200.66  | 72946.35  | 44711.82  | 72221.61  |
| 75490.92  | 61123.09  | 79015.17  | 93569.55  | 68899.33  | 71360.61  | 56774.29  | 71619.05  | 49853.04  | 74306.52  |
| 80262.19  | 56294.07  | 81662.18  | 83468.79  | 69094.01  | 72524.5   | 60510.11  | 76859.41  | 54847.19  | 78302.75  |
| 70651.94  | 60052.71  | 84755.73  | 88002.89  | 61724.09  | 69075.36  | 56978.99  | 67022.27  | 45813.63  | 76634.37  |

|           |           |           |           |           |           |           |           |           |           |
|-----------|-----------|-----------|-----------|-----------|-----------|-----------|-----------|-----------|-----------|
| LP309.205 | LP309.205 | LP309.205 | LP309.205 | LP309.205 | LP309.205 | LP309.278 | LP309.278 | LP309.278 | LP309.278 |
| 59667.88  | 91971.08  | 60221.11  | 47982.69  | 82332.97  | 57903.27  | 70898.99  | 54633.18  | 59468.27  | 46921.42  |
| 51246.96  | 92365.17  | 62128.53  | 51751.93  | 80428.75  | 54881.99  | 62893.51  | 51656.88  | 59960.17  | 37943.62  |
| 56575.01  | 88372.73  | 60814.17  | 56710.26  | 87574.58  | 53743.8   | 63344.22  | 57321.35  | 66677.59  | 38292.44  |
| 50961.96  | 79977.42  | 62233.22  | 55469.81  | 79685.77  | 58406.14  | 64379.48  | 53312.14  | 55475.93  | 43044.14  |
| 50694.46  | 85642.4   | 67106.86  | 50832.5   | 80962.8   | 52147.93  | 57137.32  | 50577.14  | 59481.2   | 42441.48  |

|           |           |           |           |           |           |           |           |           |           |
|-----------|-----------|-----------|-----------|-----------|-----------|-----------|-----------|-----------|-----------|
| LP309.278 | LP309.278 | LP309.278 | LP309.278 | LP309.278 | LP310.201 | LP310.201 | LP310.201 | LP310.201 | LP310.201 |
| 41624.04  | 47059.82  | 51323.05  | 33524.74  | 47999.33  | 35276.58  | 24987.89  | 23222.02  | 26520.83  | 20819.44  |
| 42524.75  | 46974.1   | 53968.16  | 35835.68  | 52650.05  | 30820.4   | 28878.93  | 23430.09  | 31379.53  | 21014.56  |
| 46347.25  | 50467.85  | 55811.96  | 40469.09  | 46153.48  | 30988.17  | 24574.88  | 22754.91  | 30020.23  | 20995.43  |
| 45602.53  | 48253.7   | 51477.75  | 36524.86  | 48520.56  | 29437.82  | 26046.39  | 25227.78  | 28701.65  | 20665.01  |
| 45828.64  | 47473.81  | 53211.78  | 36907.95  | 47522.93  | 30350.23  | 27602.27  | 24614.79  | 31611.08  | 17997.63  |

|           |           |           |           |           |           |           |           |           |           |
|-----------|-----------|-----------|-----------|-----------|-----------|-----------|-----------|-----------|-----------|
| LP310.237 | LP310.310 | LP310.310 | LP310.310 | LP310.311 | LP310.310 | LP310.311 | LP310.311 | LP310.311 | LP310.310 |
| 34478.13  | 945303.2  | 131637.5  | 77811.63  | 69416.39  | 75125.69  | 91376.84  | 100750.9  | 81787.65  | 124792.8  |
| 31169.15  | 901116.2  | 216673.1  | 88988.04  | 75252.36  | 66260.22  | 95128.07  | 101215.4  | 84046.75  | 121025.1  |
| 34833.31  | 874092.5  | 143171.8  | 100456.3  | 91306.07  | 123121.9  | 104790.8  | 97448.07  | 89483.67  | 136034.4  |
| 30402.27  | 594637    | 133466.2  | 94760.43  | 92670.96  | 76186.98  | 93305.71  | 99510.96  | 80456.18  | 140627    |
| 32573.88  | 854828.8  | 126051.1  | 93730.2   | 88752.47  | 81504.7   | 97841.72  | 100163.2  | 79962.66  | 131884    |



|           |           |           |           |           |           |           |           |           |           |
|-----------|-----------|-----------|-----------|-----------|-----------|-----------|-----------|-----------|-----------|
| LP310.310 | LP311.146 |
| 208571.8  | 145941.6  | 123711.6  | 148952.7  | 175530.1  | 163714.9  | 136566.9  | 149207.2  | 138472.5  | 98509.96  |
| 208045.8  | 171708.1  | 112846    | 183566.1  | 111680.3  | 184945.4  | 143854.2  | 134573.5  | 103202.6  | 147370.6  |
| 220118    | 150375.5  | 135659.1  | 138640.5  | 111032.8  | 159573.5  | 131928.1  | 192918.3  | 111177.6  | 148358.8  |
| 214237.2  | 193914.8  | 154283.3  | 140586.7  | 125233.2  | 189382.8  | 179123.8  | 143299.9  | 131763.6  | 134894    |
| 225891.9  | 116041.3  | 113646.2  | 115944.6  | 166702.5  | 124736.1  | 167937.9  | 147113.5  | 139743    | 113257.8  |

|           |           |           |           |           |           |           |           |           |           |
|-----------|-----------|-----------|-----------|-----------|-----------|-----------|-----------|-----------|-----------|
| LP311.146 | LP311.147 | LP311.146 | LP311.146 |
| 132740.7  | 175060.3  | 131428.8  | 158636.8  | 192423.6  | 104766.5  | 230815.6  | 115158.6  | 147711.1  | 219200.5  |
| 126738.2  | 126036.2  | 139585.8  | 114743.9  | 128686.3  | 121591.5  | 142020.3  | 131026.4  | 192801.3  | 161162.6  |
| 129408.7  | 116823.1  | 91595.12  | 183088.5  | 159727.2  | 101095.7  | 106893.1  | 93424.09  | 126913.7  | 123302.7  |
| 169475.3  | 148538    | 106587.7  | 123804.7  | 127683.3  | 124213.4  | 137200.7  | 93268.78  | 140750.9  | 164634.9  |
| 138211.2  | 128740    | 126888.4  | 110306.3  | 148638.7  | 140480.5  | 133983.1  | 128637.5  | 128895.1  | 171676.3  |

|           |           |           |           |           |           |           |           |           |           |
|-----------|-----------|-----------|-----------|-----------|-----------|-----------|-----------|-----------|-----------|
| LP311.146 | LP311.146 | LP311.146 | LP311.146 | LP311.147 | LP311.146 | LP311.147 | LP311.146 | LP311.146 | LP311.146 |
| 124827.8  | 171321.1  | 121778.4  | 127067.4  | 77650.84  | 111454.8  | 233730.6  | 180768.8  | 156388.6  | 172319    |
| 107194.7  | 132692.6  | 122540.7  | 138085.6  | 81919.1   | 124996.5  | 138234.8  | 145925.8  | 150173.5  | 142754.2  |
| 95681.65  | 200748.7  | 125129.2  | 138643.4  | 77404.76  | 117217.1  | 246763.6  | 173832    | 119489.1  | 213421.7  |
| 131696.1  | 155765.6  | 176436.2  | 117132.9  | 94276.21  | 166781.4  | 159590.9  | 138306.2  | 141736.8  | 129467.4  |
| 133771.1  | 180175.3  | 195708.9  | 116152    | 90286.28  | 102199.8  | 238073.6  | 173659.4  | 114119    | 145499.3  |

|           |           |           |           |           |           |           |           |           |           |
|-----------|-----------|-----------|-----------|-----------|-----------|-----------|-----------|-----------|-----------|
| LP311.147 | LP311.146 |
| 171133.7  | 128685.5  | 134083.7  | 125587.1  | 110094.1  | 179180    | 175599.1  | 137254.3  | 156059.9  | 114168.7  |
| 236117.4  | 171536.6  | 119677.7  | 148916.3  | 108462.8  | 203225.2  | 154204.7  | 131366    | 155283    | 188464.9  |
| 202964.9  | 122603.5  | 99160.69  | 141406.8  | 121389.9  | 167286.3  | 224769.6  | 133207.9  | 107015.5  | 198800.4  |
| 182201.2  | 145107.6  | 106267.7  | 144815.7  | 149530    | 145188.3  | 167016.2  | 130931.5  | 172714.6  | 119884.9  |
| 157363.8  | 164772.5  | 83640.84  | 120803.6  | 109205.9  | 154494.1  | 157768.7  | 130751.3  | 166308.7  | 155774.2  |

|           |           |           |           |           |           |           |           |           |           |
|-----------|-----------|-----------|-----------|-----------|-----------|-----------|-----------|-----------|-----------|
| LP311.147 | LP311.146 |
| 104577.7  | 187675.2  | 141363.3  | 151866.8  | 141256.7  | 175194.8  | 105913.6  | 174120.6  | 141194.8  | 137425.9  |
| 84938.87  | 122408.2  | 144898.6  | 121501.3  | 106877    | 102152.5  | 122559.3  | 206883.1  | 165346.1  | 124918.3  |
| 102921.1  | 115627.1  | 123437.7  | 159982.4  | 125169.2  | 132771.1  | 114449.6  | 135947.5  | 148190.4  | 145509.6  |
| 94955.66  | 128338.7  | 121317.4  | 157841.5  | 180472.3  | 131364.9  | 142531.9  | 142609.9  | 160253.9  | 131215.4  |
| 143373.4  | 135915.3  | 111469.9  | 117868.3  | 119299.6  | 144515.8  | 153846    | 164993.6  | 149945.5  | 114318    |

|           |           |           |           |           |           |           |           |           |           |
|-----------|-----------|-----------|-----------|-----------|-----------|-----------|-----------|-----------|-----------|
| LP311.146 |
| 132788.8  | 107060.3  | 175765.9  | 142586.8  | 111394.1  | 119337.5  | 110635.8  | 196165.8  | 130761.5  | 124393.9  |
| 145062.4  | 161789.7  | 122378.4  | 144163.4  | 112989.4  | 189039.4  | 185653.6  | 155479.7  | 126049.7  | 142006    |
| 102435.3  | 130560    | 185132.1  | 117321.3  | 162012    | 147783.2  | 124613.5  | 205448.6  | 139733.4  | 145784    |
| 166869.3  | 157261.1  | 155073.1  | 143054.7  | 123109.7  | 183373.1  | 130151.4  | 154871.8  | 157217.1  | 136625.5  |
| 113140.8  | 109271.7  | 133173.6  | 172870.2  | 78409.04  | 195363.3  | 117329.1  | 174910    | 134344.2  | 138838.2  |

|           |           |           |           |           |           |           |           |           |           |
|-----------|-----------|-----------|-----------|-----------|-----------|-----------|-----------|-----------|-----------|
| LP311.146 | LP311.146 | LP311.146 | LP311.146 | LP311.146 | LP311.146 | LP311.147 | LP311.146 | LP311.146 | LP311.147 |
| 151849.7  | 108605.2  | 177813.6  | 145571.1  | 139534.8  | 107932.2  | 152722.3  | 127896.5  | 88168.84  | 195666.6  |
| 127882.6  | 87593.54  | 157079.3  | 149848.4  | 181095.3  | 141743    | 149597.9  | 146553    | 100094.1  | 159849.2  |
| 145598.9  | 95842.15  | 154815.9  | 133012.8  | 291043.1  | 132951.2  | 150091    | 131129    | 96255.41  | 137057.9  |
| 164905.2  | 84507.86  | 143505.4  | 202496.7  | 165501.7  | 161826.5  | 141890.3  | 144693.8  | 102248.3  | 155558.9  |
| 200709.9  | 101647.7  | 169905    | 152634.5  | 133695.4  | 125401.5  | 149873    | 179427.4  | 89285.96  | 171954.5  |

|           |           |           |           |           |           |           |           |           |           |           |
|-----------|-----------|-----------|-----------|-----------|-----------|-----------|-----------|-----------|-----------|-----------|
| LP311.146 | LP311.146 | LP311.147 | LP311.146 |
| 79017.23  | 137671.1  | 139649.8  | 120849.2  | 73813.11  | 128844.4  | 57978.5   | 123921.2  | 130177.7  | 82787.51  |           |
| 88611.21  | 135111.7  | 151707.4  | 104316.7  | 77655.94  | 204424.9  | 70416.31  | 112069.5  | 162751.4  | 89319.2   |           |
| 92709.56  | 122977.2  | 193767.6  | 104523.8  | 109740.8  | 144069    | 82780.24  | 120745.5  | 159477.1  | 94683.25  |           |
| 106299.5  | 127471.6  | 176824.5  | 101086.8  | 83327.15  | 141222.9  | 113946.7  | 104815    | 158950.5  | 98991.29  |           |
| 99754.35  | 170928.6  | 111905.5  | 139850.5  | 82186.93  | 130328.1  | 78795.85  | 147770.9  | 159035.1  | 96052.45  |           |



|           |           |           |           |           |           |           |           |           |           |
|-----------|-----------|-----------|-----------|-----------|-----------|-----------|-----------|-----------|-----------|
| LP311.146 | LP311.146 | LP311.146 | LP311.146 | LP311.146 | LP311.184 | LP311.185 | LP311.185 | LP311.185 | LP311.184 |
| 106534    | 75645.29  | 115562.6  | 88932.14  | 130951    | 114227.6  | 103171.3  | 90942.75  | 86598.06  | 73208.13  |
| 69842.91  | 69024.28  | 156186.5  | 93546.95  | 60078.72  | 108140.8  | 106566    | 78883.45  | 90155.32  | 84809.53  |
| 70850.84  | 80825.76  | 196054.4  | 109750.4  | 73498.4   | 117903    | 104370.9  | 106926.9  | 81797.08  | 81002.87  |
| 98039.83  | 64236.23  | 153147.3  | 73449.15  | 82594.99  | 120614.3  | 107328.4  | 82558.48  | 92699.2   | 76842.35  |
| 67790.32  | 115446.2  | 156712    | 76407.36  | 74143.85  | 118183.4  | 108480.8  | 88933.51  | 79970.85  | 79956.77  |

|           |           |           |           |           |           |           |           |           |           |
|-----------|-----------|-----------|-----------|-----------|-----------|-----------|-----------|-----------|-----------|
| LP311.185 | LP311.185 | LP311.185 | LP311.221 |
| 96313.01  | 80397.64  | 60295.19  | 74670.28  | 142101.3  | 106281.7  | 76035.9   | 85795.62  | 86851.9   | 120801.7  |
| 99804.2   | 78958.12  | 64355.49  | 39421.16  | 72212.45  | 52667     | 37977.57  | 47548.84  | 46736.26  | 64126.9   |
| 98715.75  | 80009.41  | 60540.59  | 72392.23  | 145760.4  | 107852.6  | 70269.22  | 85700.07  | 81583.03  | 125861.2  |
| 95117.81  | 86634.49  | 56382.15  | 69480.56  | 133313.1  | 102218.5  | 76899.51  | 83456.45  | 82514.26  | 127482.6  |
| 89384.33  | 81087.06  | 58389.03  | 71548.6   | 134163.2  | 106839.4  | 69167.64  | 81510.38  | 81655.75  | 126250.8  |

|           |           |           |           |           |           |           |           |           |           |           |
|-----------|-----------|-----------|-----------|-----------|-----------|-----------|-----------|-----------|-----------|-----------|
| LP311.221 | LP311.221 | LP311.258 | LP311.294 |
| 57982.38  | 86894.29  | 131677.5  | 170451.1  | 102928.8  | 163013.6  | 101739.8  | 189384.6  | 102496.5  | 155440.1  |           |
| 39651.45  | 53507.26  | 112945.7  | 160191.5  | 109246.2  | 128330.3  | 109644.9  | 178676.3  | 78547.64  | 192245.1  |           |
| 65324.81  | 87519.22  | 120468.6  | 167947.3  | 110439.8  | 122584.9  | 97498.63  | 175989.3  | 80927.61  | 183387    |           |
| 64843.76  | 77981.53  | 105681.3  | 195523.2  | 119363.3  | 132716.2  | 101531.1  | 186272.6  | 99306.61  | 186601.1  |           |
| 58093.7   | 87422.14  | 120944.3  | 157877    | 105944.4  | 145988.8  | 103220.3  | 104522    | 78300.95  | 197992.8  |           |

|           |           |           |           |           |           |           |           |           |           |
|-----------|-----------|-----------|-----------|-----------|-----------|-----------|-----------|-----------|-----------|
| LP311.294 | LP311.295 | LP311.294 |
| 107246.5  | 188349.5  | 162649.7  | 98224.33  | 108245.4  | 122387    | 152880.3  | 138090.4  | 128418.7  | 215412.2  |
| 110235.7  | 148700.1  | 117199    | 83907.68  | 92420.57  | 120205    | 149974.6  | 145534    | 125241.1  | 208663.1  |
| 114378.4  | 147360.1  | 94876.25  | 77478.07  | 93837.31  | 116890    | 140328.4  | 146990.7  | 124613    | 200022.1  |
| 109492.7  | 159248    | 95055.92  | 82570.88  | 88961.95  | 151042.8  | 143808.8  | 145152.8  | 135618    | 196953    |
| 124129.8  | 163736.3  | 99936.29  | 79212.27  | 89776.24  | 126516.6  | 150237    | 136833.1  | 141404.5  | 256735.3  |

|           |           |           |           |           |           |           |           |           |           |
|-----------|-----------|-----------|-----------|-----------|-----------|-----------|-----------|-----------|-----------|
| LP311.294 |
| 201857.6  | 121154.7  | 93952.31  | 74955.14  | 127114.3  | 114238.7  | 125613.4  | 91746.9   | 88465.95  | 121927.8  |
| 197075.5  | 115742.1  | 93268.39  | 70490.77  | 123606.7  | 96004.3   | 121983    | 82250.48  | 91087.25  | 115220.2  |
| 196551.6  | 106941.1  | 89943.66  | 79909.53  | 119683.6  | 96601.67  | 117432.1  | 87757.71  | 93693.74  | 109466.1  |
| 201075    | 123969.5  | 91787.09  | 72992.05  | 119265.4  | 100199.5  | 124547.5  | 88949.41  | 91271.19  | 117493.5  |
| 204809.1  | 120066.4  | 101508.3  | 68984.03  | 128890.3  | 103126.1  | 123050.3  | 85702.12  | 96736.34  | 120804.7  |

|           |           |           |           |           |           |           |           |           |           |
|-----------|-----------|-----------|-----------|-----------|-----------|-----------|-----------|-----------|-----------|
| LP311.294 | LP312.230 | LP312.253 | LP312.289 | LP312.289 | LP312.297 | LP312.298 | LP312.297 | LP312.317 | LP312.326 |
| 83032.9   | 53676.14  | 24538.25  | 19765.44  | 22564.98  | 32222.57  | 28193.12  | 44998.68  | 39077.76  | 283105    |
| 86519.38  | 14612.29  | 24279.74  | 21770.4   | 19125.24  | 30520.44  | 32097.91  | 39052.61  | 38100.8   | 292344.8  |
| 83541.51  | 19413.5   | 22576.35  | 19298.1   | 24610.19  | 26904.4   | 24746.93  | 31151.53  | 33986.04  | 388762.5  |
| 91300.45  | 36363.51  | 24565.13  | 22354.64  | 22749.19  | 32289.4   | 27468.55  | 39355.24  | 32166.09  | 440461.8  |
| 83047.14  | 27866.31  | 23996.52  | 17358.03  | 21250.11  | 33386.77  | 32661.47  | 41060.44  | 35295.77  | 469905.8  |

|           |           |           |           |           |           |           |           |           |           |
|-----------|-----------|-----------|-----------|-----------|-----------|-----------|-----------|-----------|-----------|
| LP312.326 | LP312.326 | LP312.362 | LP313.125 | LP313.126 | LP313.126 | LP313.126 | LP313.125 | LP313.125 | LP313.125 |
| 924232.8  | 32944.99  | 33014.61  | 20648.2   | 26186.99  | 37027.52  | 20151.95  | 16637.73  | 42460.92  | 38390.55  |
| 1049659   | 35700.63  | 37810.73  | 27047.6   | 30127.5   | 40774.64  | 21797.8   | 24807.41  | 48926.67  | 36403.3   |
| 1585643   | 34055.78  | 60196.16  | 22513.44  | 30507.22  | 35919.59  | 16959.72  | 18811.49  | 46266.51  | 35965.19  |
| 1940098   | 33446.44  | 75387.83  | 20957.4   | 26905.59  | 37211.78  | 19804.55  | 15131.75  | 49369.69  | 33784.69  |
| 2128318   | 35282.29  | 82406.57  | 20113.61  | 25960.82  | 41162.17  | 21998.56  | 21181.11  | 47048.64  | 35322.08  |

|           |           |           |           |           |           |           |           |           |           |
|-----------|-----------|-----------|-----------|-----------|-----------|-----------|-----------|-----------|-----------|
| LP313.126 | LP313.125 | LP313.126 | LP313.125 |
| 42765.22  | 34223.19  | 37250.13  | 34791.81  | 46069.82  | 41310.59  | 24692.53  | 48038.68  | 47630.84  | 38465.96  |
| 39438.86  | 39329.5   | 43934.91  | 36410.23  | 44624.74  | 48065.98  | 26426.65  | 53855.79  | 50753.17  | 42516.71  |
| 39038.34  | 28555.01  | 41471.38  | 32937.99  | 51047.25  | 45805.28  | 27453.01  | 48689.5   | 48518.38  | 35126.42  |
| 36955.49  | 30808.55  | 40117.23  | 30647.87  | 45571.33  | 42665.6   | 22906.55  | 51044.78  | 50435.62  | 36012.16  |
| 37864.62  | 31370.46  | 40705.08  | 34211.61  | 40148.41  | 47505.93  | 24358.34  | 51432.97  | 50412.5   | 33510.47  |



|           |           |           |           |           |           |           |           |           |           |
|-----------|-----------|-----------|-----------|-----------|-----------|-----------|-----------|-----------|-----------|
| LP313.126 | LP313.125 | LP313.126 | LP313.125 | LP313.125 | LP313.125 | LP313.126 | LP313.125 | LP313.125 | LP313.125 |
| 37917.12  | 39485.88  | 40086.91  | 35658.72  | 44767.41  | 49386.54  | 25906.06  | 25113.3   | 22232.05  | 57490.09  |
| 42765.99  | 43809.5   | 42063.55  | 36727.46  | 49278.96  | 59483.65  | 17146.23  | 23063.69  | 19959.15  | 56200.13  |
| 36862.35  | 38581.55  | 41241.02  | 36027.12  | 45295.17  | 53010.46  | 18809.97  | 26050.8   | 28644.87  | 56763.01  |
| 34454.48  | 32137.03  | 39307.76  | 33652.17  | 44152     | 61442.3   | 22519.08  | 21577.51  | 22002.39  | 60140.36  |
| 35788.9   | 39280.17  | 38001.26  | 33252.86  | 43806.36  | 48903.28  | 23043.75  | 24261.8   | 21652.74  | 54717.91  |

|           |           |           |           |           |           |           |           |           |           |
|-----------|-----------|-----------|-----------|-----------|-----------|-----------|-----------|-----------|-----------|
| LP313.125 | LP313.126 | LP313.125 | LP313.126 | LP313.125 | LP313.126 | LP313.125 | LP313.125 | LP313.125 | LP313.125 |
| 25993.11  | 17103.69  | 53952.37  | 48023.71  | 42352.4   | 49973.83  | 36511.21  | 28320.64  | 43895.25  | 84662.29  |
| 26789.02  | 16658.76  | 56540.65  | 46358.21  | 40814.34  | 50492.4   | 41789.02  | 21873.4   | 49756.07  | 81363.93  |
| 23775     | 16698.02  | 52512.33  | 44574.76  | 37357.36  | 49476.53  | 36359.65  | 19829.73  | 44604.29  | 81930.4   |
| 23196.35  | 16185.81  | 51360.23  | 44324.77  | 38049.76  | 49830.9   | 40971.44  | 19704.79  | 42207.94  | 81608.88  |
| 26942.09  | 15956.22  | 56658.06  | 42228.32  | 43658.18  | 49124.59  | 38242.37  | 23118.81  | 45976.82  | 78596.25  |

|           |           |           |           |           |           |           |           |           |           |
|-----------|-----------|-----------|-----------|-----------|-----------|-----------|-----------|-----------|-----------|
| LP313.126 | LP313.125 | LP313.126 | LP313.126 | LP313.125 | LP313.125 | LP313.125 | LP313.125 | LP313.126 | LP313.125 |
| 26136.74  | 39674.81  | 30364.66  | 27095.81  | 37641.72  | 63739.39  | 46760.89  | 57687.38  | 23671.44  | 49331.26  |
| 28992.52  | 52750     | 31405.71  | 29056.77  | 41401     | 68155.45  | 52638.58  | 54991.67  | 26810.26  | 48516.09  |
| 26106.72  | 44644.16  | 28966.18  | 26834.09  | 35495.93  | 58819.21  | 49122.2   | 61590.55  | 20865.23  | 45400.35  |
| 24243.6   | 44635.81  | 27059.01  | 24478.35  | 30585.21  | 57100.47  | 50364     | 55538.14  | 22411.96  | 41181.01  |
| 26395.81  | 44235.99  | 25789.38  | 25138.23  | 31309.6   | 64679.18  | 48157.87  | 51249.47  | 21306.95  | 42838.71  |

|           |          |           |          |           |          |           |          |           |          |           |          |           |          |           |          |           |          |           |          |
|-----------|----------|-----------|----------|-----------|----------|-----------|----------|-----------|----------|-----------|----------|-----------|----------|-----------|----------|-----------|----------|-----------|----------|
| LP313.125 | 45989.8  | LP313.125 | 70298.37 | LP313.126 | 18791.06 | LP313.125 | 53613.21 | LP313.126 | 49512.44 | LP313.125 | 44864.4  | LP313.125 | 36685.86 | LP313.125 | 50051.57 | LP313.125 | 43049.58 | LP313.125 | 34323.49 |
|           | 48659.62 |           | 77814.22 |           | 21009.91 |           | 53570.93 |           | 59184.47 |           | 50182.51 |           | 37825.44 |           | 53017.69 |           | 48281.63 |           | 38281.36 |
|           | 41703.23 |           | 83362.88 |           | 19857.84 |           | 50401.4  |           | 58316.59 |           | 43524.33 |           | 37634.58 |           | 56252.89 |           | 48403.68 |           | 40764.04 |
|           | 42872.84 |           | 73971.46 |           | 17752.72 |           | 52342.75 |           | 49413.96 |           | 46645.49 |           | 30244.62 |           | 49555.29 |           | 38382.14 |           | 36570.33 |
|           | 42709.52 |           | 77456.52 |           | 17881.83 |           | 50462.79 |           | 52571.59 |           | 49566.21 |           | 31590.63 |           | 51492.95 |           | 40797.21 |           | 37205.93 |

|           |           |           |           |           |           |           |           |           |           |
|-----------|-----------|-----------|-----------|-----------|-----------|-----------|-----------|-----------|-----------|
| LP313.126 | LP313.125 | LP313.125 | LP313.126 | LP313.126 | LP313.125 | LP313.125 | LP313.126 | LP313.125 | LP313.126 |
| 43288.83  | 30739.07  | 49493.59  | 21180.43  | 54991.16  | 34020.97  | 32460.03  | 15589.46  | 62507.3   | 47015.47  |
| 43344.19  | 40453.52  | 56630.61  | 20834.23  | 60402.83  | 38069.05  | 34112.23  | 15173.85  | 64608.74  | 52788.25  |
| 42066.9   | 36998.77  | 45819.77  | 15394.22  | 56030.22  | 38016.77  | 33556.03  | 14795.13  | 60815.12  | 46557.19  |
| 42002.86  | 31095.77  | 49192.02  | 17666.29  | 53314.79  | 37324.76  | 31705.87  | 10605.1   | 58124.23  | 42494.08  |
| 40962.17  | 32872.46  | 47027.31  | 19437.43  | 57767.8   | 36915.46  | 34787.43  | 15286.06  | 65217.62  | 43608.61  |

|           |           |           |           |           |           |           |           |           |           |
|-----------|-----------|-----------|-----------|-----------|-----------|-----------|-----------|-----------|-----------|
| LP313.125 | LP313.125 | LP313.126 | LP313.125 | LP313.125 | LP313.125 | LP313.126 | LP313.125 | LP313.143 | LP313.154 |
| 35415.28  | 55168.17  | 33198.38  | 62440.06  | 45079.24  | 36736.62  | 42706.8   | 51306.12  | 27948.85  | 120520.9  |
| 37252.48  | 56862.21  | 37394     | 63038.12  | 47201.48  | 40452.11  | 48023     | 52532     | 31593.47  | 121195.2  |
| 33548.63  | 57329.16  | 35840.47  | 68499.79  | 40674.87  | 31826.78  | 45584.32  | 54722.63  | 30938.68  | 137608.2  |
| 36753.3   | 50739.75  | 32511.27  | 64381.32  | 50034.26  | 38751.85  | 40632.47  | 54707.74  | 32579.88  | 129330.5  |
| 34546.64  | 53169.65  | 36067.55  | 65791.15  | 44249.32  | 35553.02  | 45392.66  | 48344.77  | 29866.27  | 57262.63  |

|           |           |           |           |           |           |           |           |           |           |
|-----------|-----------|-----------|-----------|-----------|-----------|-----------|-----------|-----------|-----------|
| LP313.154 | LP313.154 | LP313.154 | LP313.154 | LP313.154 | LP313.154 | LP313.162 | LP313.162 | LP313.162 | LP313.162 |
| 102877.4  | 107251.1  | 154103.3  | 104771.3  | 96651.56  | 26796.92  | 124370.2  | 108889.9  | 159596.7  | 118157.8  |
| 114376.8  | 100145.3  | 152676.7  | 107126.7  | 96935.6   | 126033.6  | 92119.84  | 111275.3  | 106660.3  | 117760.9  |
| 110601.8  | 105090.8  | 155093.3  | 97674.49  | 96127.97  | 119969.4  | 115735.4  | 172484.2  | 145065.3  | 97845.98  |
| 108497.1  | 108291.2  | 157243.2  | 103618.8  | 105211.4  | 120529.4  | 120655    | 124089.5  | 188097.9  | 121281.6  |
| 109024.1  | 110953.9  | 143943.6  | 101243.1  | 108703.1  | 118932.9  | 122463    | 132814.7  | 144917.7  | 169925.1  |

|           |           |           |           |           |           |           |           |           |           |
|-----------|-----------|-----------|-----------|-----------|-----------|-----------|-----------|-----------|-----------|
| LP313.162 |
| 130246.9  | 135042.5  | 144290.7  | 121444.6  | 98297.6   | 140705.3  | 118901.2  | 107664.1  | 130489.3  | 137851.2  |
| 115275.3  | 156818    | 147505.5  | 126100.3  | 100101    | 104352.7  | 109034.2  | 104168.4  | 133720    | 143565.4  |
| 143561.1  | 145183.2  | 123437.4  | 130660.1  | 98445.74  | 102726.9  | 112117.6  | 105329.7  | 139516.9  | 179329.1  |
| 121357.9  | 119820    | 165494.7  | 149695.2  | 108512.3  | 99824.41  | 119259.3  | 95366.38  | 130506.3  | 180881.7  |
| 147283.3  | 146659.3  | 196903.7  | 130513.5  | 108358.8  | 99783.79  | 125212.4  | 115960.6  | 148603.9  | 126278.6  |



|           |           |           |           |           |           |           |           |           |           |
|-----------|-----------|-----------|-----------|-----------|-----------|-----------|-----------|-----------|-----------|
| LP313.162 |
| 161475.4  | 113827.3  | 110343    | 128415.8  | 101070.2  | 91901.17  | 119140.3  | 85715.08  | 92732.58  | 115785.2  |
| 170160.6  | 108861.2  | 98090.18  | 133010.2  | 86731.23  | 89705.6   | 118965.4  | 86072.03  | 88245.77  | 112360.8  |
| 115140.5  | 151933.8  | 110502.7  | 136195.6  | 103461.4  | 95839.89  | 119167    | 86961.21  | 91852.78  | 119661.9  |
| 114753.8  | 155747.8  | 96889.62  | 132235.4  | 171141.5  | 77348.08  | 123723.5  | 92291.73  | 87562.75  | 109347.7  |
| 108501.2  | 110036.2  | 93112.18  | 139906.3  | 84495.83  | 101648.8  | 128414.7  | 91065.19  | 86153.74  | 118957.9  |

|           |           |           |           |           |           |           |           |           |           |           |
|-----------|-----------|-----------|-----------|-----------|-----------|-----------|-----------|-----------|-----------|-----------|
| LP313.162 |
| 125444.2  | 139294.4  | 85201.4   | 71124.34  | 105228.3  | 85582.29  | 82882.44  | 87239.69  | 91579.46  | 142768.4  |           |
| 120972    | 136463.7  | 90669.73  | 68259.22  | 101158.4  | 86221.29  | 71303.36  | 83714.57  | 86359.12  | 210855.1  |           |
| 121292.8  | 129654.9  | 89885.94  | 71142.71  | 104666.1  | 79282.01  | 72577.26  | 82136.5   | 81099.23  | 122000.4  |           |
| 120467    | 136504.2  | 83217.54  | 64619.72  | 104476    | 81099.1   | 71273.31  | 75172.04  | 85746.14  | 178457.7  |           |
| 110240.3  | 131235.4  | 88273.59  | 64423.27  | 95124.38  | 84961.89  | 68942.18  | 84111.25  | 81639.56  | 120970.7  |           |

|            |           |           |           |           |           |           |           |           |           |
|------------|-----------|-----------|-----------|-----------|-----------|-----------|-----------|-----------|-----------|
| LP313.162! | LP313.162 |
| 108649.7   | 132718.4  | 93602     | 142714.7  | 157329.4  | 168075    | 114997.5  | 153757.4  | 112733.8  | 109415.1  |
| 136912.5   | 108511.9  | 96282.7   | 119734.6  | 110164.3  | 148269    | 96802.9   | 143928.8  | 99328.95  | 105435.2  |
| 120296.1   | 142148.9  | 146664.2  | 130927.8  | 122720.7  | 116232.1  | 147686.6  | 145263.4  | 103412.9  | 85604.29  |
| 102482.8   | 115960.2  | 89158.35  | 125338.8  | 138311.8  | 126377.6  | 169458.3  | 175939.9  | 80693.71  | 114691.2  |
| 98581.05   | 121830.4  | 98631.34  | 127856.9  | 121935.5  | 112065.4  | 126287.6  | 175315.8  | 93264.12  | 113168.2  |

|           |           |           |           |           |           |           |           |           |           |
|-----------|-----------|-----------|-----------|-----------|-----------|-----------|-----------|-----------|-----------|
| LP313.162 |
| 192795.4  | 135521.5  | 134863.6  | 99782.58  | 109977.2  | 123163.8  | 153682.1  | 197778.6  | 162638.3  | 128407.4  |
| 159437.9  | 107929.5  | 136381    | 108110.3  | 158816.6  | 124696.1  | 156938.2  | 104711.2  | 132705.7  | 127945    |
| 141395.2  | 140588.5  | 145829.6  | 110850.7  | 109404.9  | 117885.4  | 155928.4  | 144130.2  | 152845.9  | 121984.4  |
| 163630.9  | 147255.5  | 132874.2  | 146059.6  | 103665.7  | 124971.7  | 149679.3  | 129336.4  | 170914.5  | 126111.7  |
| 148780.3  | 148454    | 130349.8  | 92498.72  | 141723.4  | 113077.7  | 156176    | 156566.1  | 142226.1  | 125691.6  |

|           |           |           |           |           |           |           |           |           |           |
|-----------|-----------|-----------|-----------|-----------|-----------|-----------|-----------|-----------|-----------|
| LP313.162 | LP313.162 | LP313.162 | LP313.162 | LP313.162 | LP313.162 | LP313.163 | LP313.162 | LP313.162 | LP313.163 |
| 124861.5  | 120150.4  | 153576    | 130240.9  | 114901.4  | 137422.4  | 154582    | 157359.2  | 129723.9  | 148309.8  |
| 120132.5  | 135639    | 120935.1  | 131579.4  | 175288.6  | 108531.6  | 152396.3  | 167401.3  | 126279.8  | 158634.3  |
| 135118.2  | 123770.1  | 162857.5  | 113820.3  | 128918    | 120578.9  | 156370.8  | 141648.7  | 125130.5  | 145595.2  |
| 108740    | 115407.6  | 220259.8  | 163140.3  | 129559.3  | 122921.1  | 143965.2  | 154065.4  | 131638.5  | 156387.2  |
| 143398.8  | 126456.3  | 112603.6  | 142860.3  | 139865.2  | 124192.8  | 141611.1  | 156244.4  | 129784.3  | 148345.6  |

|           |           |           |           |           |           |           |           |           |           |
|-----------|-----------|-----------|-----------|-----------|-----------|-----------|-----------|-----------|-----------|
| LP313.162 | LP313.162 | LP313.163 | LP313.200 | LP313.200 | LP313.201 | LP313.201 | LP313.200 | LP313.204 | LP313.237 |
| 102530.1  | 85158.15  | 90481.39  | 134168.9  | 118245.9  | 107419.3  | 86686.25  | 91606.17  | 114462.9  | 110409.8  |
| 107542    | 95256.96  | 94559.09  | 141309.8  | 117574    | 109524.2  | 91332.11  | 104913.1  | 113292.9  | 105970.6  |
| 96559.75  | 88219.01  | 90949.82  | 138078.6  | 107884.9  | 102001.4  | 88336.3   | 92932.42  | 106742.9  | 99647.35  |
| 100206.2  | 81744.63  | 89680.16  | 122499.1  | 106400.5  | 102851.1  | 85713.78  | 86802.48  | 100557.6  | 98769.73  |
| 104581.2  | 83585.75  | 86413.38  | 123443    | 105439.1  | 108280.4  | 81482.81  | 85836.76  | 98875.58  | 94768.89  |

|           |           |           |           |           |           |           |           |           |           |           |
|-----------|-----------|-----------|-----------|-----------|-----------|-----------|-----------|-----------|-----------|-----------|
| LP313.237 | LP313.237 | LP313.237 | LP313.273 | LP313.273 | LP313.273 | LP313.273 | LP313.273 | LP313.273 | LP313.274 | LP313.273 |
| 112493.8  | 131953.6  | 89427.45  | 1201943   | 701662.6  | 804462.6  | 235412.6  | 134705.5  | 471854.8  | 440192.3  |           |
| 112812.6  | 113017.2  | 98979.05  | 1240203   | 784757.2  | 804873.9  | 231934.5  | 148720.8  | 482516.9  | 396183.3  |           |
| 117345    | 117378.8  | 86643.61  | 1521554   | 977285.9  | 959809.5  | 242439.1  | 131412.7  | 473228.8  | 430349.7  |           |
| 115819.8  | 111596.3  | 86265.33  | 1277573   | 1095807   | 925266.5  | 231059.2  | 127510    | 443079.5  | 408882.8  |           |
| 112233    | 120260.2  | 78814.3   | 896916.5  | 1171522   | 593671    | 251371.7  | 117067.1  | 411371.9  | 403037.4  |           |

|            |           |            |            |            |           |            |           |            |            |
|------------|-----------|------------|------------|------------|-----------|------------|-----------|------------|------------|
| LP313.273! | LP313.274 | LP313.273! | LP313.273! | LP313.273! | LP313.274 | LP313.273! | LP313.274 | LP313.273! | LP313.273! |
| 89303.97   | 215870.5  | 250949.7   | 740120.1   | 138585.1   | 210588.7  | 254901.7   | 251285.1  | 210293.6   | 348753.4   |
| 97971.94   | 222884.4  | 251030.9   | 722151     | 141309.8   | 197113.8  | 247271.9   | 240086.7  | 187099.9   | 361649.4   |
| 95006.15   | 224212.7  | 244480.5   | 745187.2   | 146387.6   | 208835.6  | 260041.3   | 254624.5  | 212145.6   | 359559.9   |
| 86367.97   | 208759.5  | 228966.5   | 741225.3   | 147793.2   | 181307.5  | 248959.2   | 244619.3  | 183775.2   | 326894.8   |
| 87291.96   | 209273.5  | 223336.9   | 749007.3   | 131915.8   | 175514.9  | 242804.4   | 222188.6  | 212161.2   | 302985.1   |



|           |           |           |           |           |           |           |           |           |           |
|-----------|-----------|-----------|-----------|-----------|-----------|-----------|-----------|-----------|-----------|
| LP313.273 | LP313.273 | LP313.273 | LP313.273 | LP313.274 | LP313.273 | LP313.273 | LP313.274 | LP313.273 | LP313.273 |
| 276365.8  | 87541.1   | 146290    | 211917.8  | 242179.1  | 237562.8  | 375363.1  | 239971.7  | 159950    | 279025.2  |
| 264107.2  | 86615.59  | 155867.4  | 206066.2  | 243443.2  | 231454    | 381542.1  | 254483.6  | 169583.5  | 248259.2  |
| 252665    | 97699.54  | 155069.5  | 198504.9  | 242854.3  | 237233.8  | 388397.8  | 275441    | 193622.5  | 273663.1  |
| 233240.7  | 87724.09  | 165551.4  | 190403.1  | 255866.5  | 234565    | 356566.7  | 242111.9  | 153770.9  | 257329.9  |
| 226173.7  | 86991.44  | 160197.1  | 183731.1  | 226129    | 218792.4  | 345781.1  | 236493.4  | 153543.4  | 253308.8  |

|           |           |           |           |           |           |           |           |           |           |
|-----------|-----------|-----------|-----------|-----------|-----------|-----------|-----------|-----------|-----------|
| LP313.274 | LP313.274 | LP313.273 | LP313.274 | LP313.273 | LP313.274 | LP313.274 | LP313.329 | LP314.180 | LP314.276 |
| 459521.4  | 261809.4  | 100970.2  | 252498.5  | 112987.8  | 139356.2  | 237822.5  | 73598.93  | 16323.61  | 233328.3  |
| 449346    | 274158.9  | 97044.86  | 249355    | 123218.9  | 141736.3  | 251458.8  | 201985.9  | 15293.25  | 182587.4  |
| 469150.8  | 284636.2  | 108590.8  | 250782.1  | 119974.6  | 131975.9  | 261772.5  | 88565.42  | 15984.47  | 173532.6  |
| 457069.5  | 253486.6  | 109491.8  | 245613    | 113753    | 129117.6  | 244458.7  | 233169.2  | 14918.2   | 209949.6  |
| 479266.2  | 247309.8  | 98562.38  | 231711.4  | 92926.57  | 139221.7  | 228278    | 109602.4  | 14470.13  | 191684.2  |

|           |           |           |           |           |           |           |           |           |           |
|-----------|-----------|-----------|-----------|-----------|-----------|-----------|-----------|-----------|-----------|
| LP314.277 | LP314.332 | LP314.332 | LP314.341 | LP315.142 | LP315.142 | LP315.142 | LP315.142 | LP315.142 | LP315.142 |
| 138832.8  | 20358.02  | 20140.75  | 198508.8  | 44694.54  | 29578.81  | 36845.47  | 40733.01  | 43793.79  | 39926.43  |
| 148394.4  | 21008.53  | 19815.42  | 215947.2  | 44804.14  | 28089.68  | 35848.62  | 42415.6   | 47150.99  | 42752.71  |
| 164900.4  | 21280.39  | 21322.28  | 265184.4  | 54729.39  | 30319.79  | 36373.07  | 44140.75  | 47624.2   | 36369.88  |
| 142311.5  | 23506.72  | 19341.75  | 295906.2  | 41778.14  | 36795.84  | 38837.75  | 43204.59  | 54796.34  | 42205.38  |
| 150920.4  | 22359.72  | 21964.36  | 317543.9  | 49258.29  | 32894.01  | 36931.08  | 36902.53  | 39462.06  | 39802.34  |

|           |           |           |           |           |           |           |           |           |           |
|-----------|-----------|-----------|-----------|-----------|-----------|-----------|-----------|-----------|-----------|
| LP315.195 | LP315.253 | LP315.289 | LP315.325 | LP315.337 | LP315.768 | LP316.256 | LP316.271 | LP316.273 | LP316.284 |
| 15558.98  | 43922.84  | 58689.2   | 20357.49  | 22317.69  | 6734.531  | 17018.57  | 31669.35  | 36452.34  | 224830.9  |
| 13943.4   | 41743.1   | 65366.51  | 20572.7   | 22607.88  | 7487.562  | 19511.57  | 27318.38  | 38997.32  | 193475    |
| 9882.3    | 51916.61  | 68264.91  | 14941.59  | 20206.29  | 11679.08  | 18041.39  | 25657.64  | 40051.83  | 195000    |
| 13754.44  | 55982.93  | 78188.35  | 20822.4   | 26688.89  | 14133.26  | 17501.47  | 28918.34  | 42088.93  | 172359.5  |
| 14378.98  | 61046.19  | 81907.77  | 21054.01  | 23763.63  | 15695.59  | 18782.38  | 25512.88  | 43616.21  | 198433.4  |

|           |           |           |           |           |           |           |           |           |           |
|-----------|-----------|-----------|-----------|-----------|-----------|-----------|-----------|-----------|-----------|
| LP316.284 | LP316.284 | LP316.292 | LP316.348 | LP317.115 | LP317.114 | LP317.115 | LP317.114 | LP317.115 | LP317.115 |
| 192558    | 34931.9   | 33049.18  | 21492.4   | 72083.85  | 141879.5  | 187271.9  | 123350.5  | 54911.77  | 168758.1  |
| 170733    | 30355.65  | 32000.66  | 23619.25  | 88308.43  | 196275.1  | 122253.6  | 159737.4  | 90135.24  | 184762.4  |
| 141938.1  | 35400     | 32827.12  | 21632.3   | 70553.2   | 139077.5  | 106696    | 153242.4  | 81322.42  | 244734.6  |
| 208949.3  | 38184.5   | 30105.52  | 20911.46  | 84939.57  | 94333.15  | 163094.2  | 211343.7  | 67411.63  | 136993.6  |
| 165304.4  | 37918.08  | 32231.64  | 21376.54  | 62416.67  | 148172.3  | 116525.5  | 208961.2  | 83500.29  | 184037.7  |

|           |           |           |           |           |           |           |           |           |           |
|-----------|-----------|-----------|-----------|-----------|-----------|-----------|-----------|-----------|-----------|
| LP317.115 | LP317.115 | LP317.114 | LP317.115 | LP317.114 | LP317.115 | LP317.114 | LP317.115 | LP317.114 | LP317.115 |
| 159243.7  | 122735.6  | 156796.8  | 183199.2  | 90984.76  | 157771.4  | 114885.4  | 196236.1  | 64900.32  | 128203.6  |
| 184305.6  | 101426.3  | 150700.7  | 178323.3  | 113726.4  | 149746.5  | 134078.9  | 221423.5  | 139792.2  | 73609.97  |
| 153455.8  | 105328.4  | 95993.91  | 189635.8  | 108931.4  | 210894.8  | 120647.8  | 128926.8  | 92921.5   | 79328.46  |
| 133405.6  | 91447.58  | 219692.3  | 190482.4  | 64925.64  | 147613.1  | 114744    | 115006.8  | 78648.32  | 67855.94  |
| 135647.4  | 122361.5  | 169957.6  | 140619.1  | 98569.41  | 121714.4  | 193837.4  | 128340    | 124337    | 101221.3  |

|           |           |           |           |           |           |           |           |           |           |
|-----------|-----------|-----------|-----------|-----------|-----------|-----------|-----------|-----------|-----------|
| LP317.115 | LP317.114 | LP317.114 | LP317.115 | LP317.115 | LP317.115 | LP317.115 | LP317.114 | LP317.115 | LP317.114 |
| 52733.36  | 237195.6  | 95728.36  | 136899.8  | 181538.1  | 148842.2  | 165247.5  | 209219.3  | 145328.5  | 148293.9  |
| 64477.28  | 190760.3  | 141631    | 108658.1  | 132909.3  | 106256.7  | 221729.9  | 173773.5  | 235986    | 138537.8  |
| 41539.72  | 130821.5  | 132948.1  | 98622.47  | 196725.9  | 83002.41  | 218650.7  | 174230.1  | 133304.3  | 177637.6  |
| 39942.22  | 163966.2  | 152754.7  | 127401.2  | 237287.2  | 129990.4  | 186813.9  | 175706.2  | 182607.7  | 168668.5  |
| 38028.43  | 174725.4  | 100915.7  | 82301.81  | 166819.7  | 124019.2  | 181470.2  | 187569.1  | 179858    | 207426.4  |

|           |           |           |           |           |           |           |           |           |           |
|-----------|-----------|-----------|-----------|-----------|-----------|-----------|-----------|-----------|-----------|
| LP317.115 | LP317.115 | LP317.115 | LP317.114 | LP317.115 | LP317.115 | LP317.115 | LP317.114 | LP317.115 | LP317.115 |
| 169492.6  | 141298.8  | 163629.4  | 138599.6  | 216491.1  | 163158    | 113967.4  | 100797.1  | 115152.7  | 101043.8  |
| 176438.5  | 155846    | 124894.9  | 153215    | 190679.1  | 206694.6  | 120932.6  | 132066.5  | 180265    | 85250.47  |
| 140974.9  | 171633.3  | 147541.5  | 216284.8  | 205932.1  | 175033.9  | 161959.2  | 112350.2  | 190342.5  | 123817.1  |
| 151006    | 206283.7  | 147244.7  | 191085    | 185561.1  | 167859    | 109982.3  | 122023.9  | 142415.9  | 92196.8   |
| 183685.1  | 157969.9  | 134651.4  | 175351.1  | 212705.7  | 240133.5  | 188941.8  | 87177.82  | 188679.6  | 119467.4  |



|           |           |           |           |           |           |           |           |           |           |
|-----------|-----------|-----------|-----------|-----------|-----------|-----------|-----------|-----------|-----------|
| LP317.115 | LP317.115 | LP317.114 | LP317.114 | LP317.115 | LP317.114 | LP317.115 | LP317.115 | LP317.115 | LP317.115 |
| 169080.4  | 175031    | 71315.08  | 68293.98  | 130785.7  | 147891.2  | 111723.4  | 289238.9  | 188597.4  | 168044.4  |
| 124000    | 292372.5  | 53459.94  | 72624.78  | 134302.4  | 138246.6  | 102222.3  | 189980.4  | 192459.2  | 101685.7  |
| 146314.4  | 201064.8  | 62628.39  | 90055.72  | 114197.7  | 107103    | 144454.7  | 183210.4  | 170604.6  | 136082    |
| 154311.9  | 153042.3  | 38884.16  | 67260.24  | 101930.6  | 204533.5  | 102700.8  | 222400.7  | 142444.6  | 116424.9  |
| 125838.2  | 174357.7  | 50225.62  | 70924.76  | 152939    | 164296.9  | 114275.5  | 180876.1  | 202304.1  | 144441.5  |

|           |           |           |           |           |           |           |           |           |           |
|-----------|-----------|-----------|-----------|-----------|-----------|-----------|-----------|-----------|-----------|
| LP317.115 | LP317.115 | LP317.114 | LP317.115 |
| 142093.8  | 180498    | 97088.01  | 162101.4  | 157960.2  | 218613.3  | 143395.2  | 152959.6  | 36719.24  | 141833.5  |
| 148933    | 257128.9  | 84518.06  | 226521.8  | 126995.2  | 135157.2  | 139424    | 164975.7  | 50439.6   | 159882.4  |
| 107445.4  | 210202.2  | 124225.2  | 199674.6  | 112157.5  | 191249.9  | 112195.3  | 128713.7  | 60120.89  | 186257.9  |
| 159890    | 170853.8  | 106138.9  | 169772.6  | 126901.9  | 178623.8  | 141194.1  | 154196.7  | 59037.17  | 181215.2  |
| 176711.2  | 182730    | 106190    | 199682.9  | 118344.2  | 194020.2  | 177816.7  | 135561    | 47240.96  | 258724.2  |

|           |           |           |           |           |           |           |           |           |           |
|-----------|-----------|-----------|-----------|-----------|-----------|-----------|-----------|-----------|-----------|
| LP317.115 |
| 118796.8  | 137858.4  | 44372.09  | 92698.63  | 186972.5  | 243213.7  | 118998.9  | 40869.32  | 57586.55  | 39546.59  |
| 119607.4  | 141153.9  | 53598.63  | 106753.1  | 174828.8  | 153411.9  | 158713.1  | 60397.89  | 46482.71  | 41906.19  |
| 162699.2  | 128421.4  | 58014.42  | 134150.8  | 219316.2  | 168428.6  | 115769    | 46041.59  | 31603.58  | 31079.08  |
| 99743.97  | 166470.4  | 64526.8   | 165534.2  | 169415.9  | 167320.3  | 184496.4  | 47917.19  | 55428.54  | 32062.47  |
| 190164.2  | 131240.8  | 61661.74  | 93477.4   | 172066.1  | 178557.5  | 134653.9  | 56530.8   | 54007.46  | 35498.5   |

|           |           |           |           |           |           |           |           |           |           |
|-----------|-----------|-----------|-----------|-----------|-----------|-----------|-----------|-----------|-----------|
| LP317.115 |
| 45439.13  | 159496    | 149337.1  | 174454.9  | 70709.79  | 232206.5  | 118067.1  | 44261.49  | 216202.4  | 78476.1   |
| 54475.63  | 189088.9  | 99654.95  | 170945.7  | 44978.31  | 176737.1  | 175452.1  | 43157.07  | 210824.5  | 77535.38  |
| 56743.13  | 178732.6  | 121852.2  | 251766.1  | 49589.08  | 173651.1  | 141974.7  | 33372.16  | 128966.7  | 55721.64  |
| 58353     | 128411    | 119349.4  | 220763.8  | 62841.05  | 193663.7  | 123143.1  | 37725.76  | 227322.5  | 59019.77  |
| 50712.23  | 141804.2  | 146778.2  | 154659.5  | 61096.01  | 166604    | 165593.5  | 38903.96  | 178616.5  | 80973.24  |

|           |           |           |           |           |           |           |           |           |           |
|-----------|-----------|-----------|-----------|-----------|-----------|-----------|-----------|-----------|-----------|
| LP317.115 | LP317.114 | LP317.196 | LP317.196 |
| 96332.22  | 161594.3  | 158209.8  | 173984.2  | 143109.9  | 199399.6  | 156225.1  | 208273    | 15949.13  | 12203.33  |
| 124509.6  | 161656.7  | 195956    | 125175.6  | 153649.5  | 156194.9  | 157025.3  | 168200.9  | 13456.03  | 13603.88  |
| 94694.67  | 162011.5  | 208902.6  | 166488.6  | 183514.4  | 201209.1  | 145668.2  | 162760.7  | 16026.01  | 14367.59  |
| 147526.2  | 149367.6  | 191748.7  | 192572.1  | 191755.2  | 173597.6  | 191493.7  | 164223.8  | 13736.59  | 12084.15  |
| 110701.5  | 175853.6  | 206291.3  | 190188.9  | 179298.4  | 181234.6  | 195116.5  | 144125.5  | 17079.09  | 11970.01  |

|           |           |           |           |           |           |           |           |           |           |
|-----------|-----------|-----------|-----------|-----------|-----------|-----------|-----------|-----------|-----------|
| LP317.248 | LP317.288 | LP317.288 | LP317.305 | LP318.118 | LP318.118 | LP318.118 | LP318.227 | LP318.227 | LP318.227 |
| 19872.22  | 32525.04  | 22046.06  | 12359.63  | 8257.008  | 28259.79  | 29471.01  | 96167.16  | 82055.27  | 106589.7  |
| 20649.36  | 41985.75  | 37545.69  | 11195.21  | 11353.21  | 33735.98  | 31035.47  | 93879.08  | 73191.6   | 99395.32  |
| 19672.56  | 44601.71  | 35238.74  | 11715.88  | 10740.32  | 25510.39  | 32716.79  | 92166.34  | 56733.76  | 83249.64  |
| 19146.81  | 26889.23  | 36060.66  | 4759.807  | 10632.3   | 33732.33  | 25822.94  | 95976.57  | 82510.41  | 108813.7  |
| 16890.93  | 32526.2   | 28977.66  | 10158.56  | 8252.269  | 35863.32  | 33744.2   | 91833.75  | 86676.41  | 103692.2  |

|           |           |           |           |           |           |           |           |           |           |
|-----------|-----------|-----------|-----------|-----------|-----------|-----------|-----------|-----------|-----------|
| LP318.227 |
| 124446.5  | 78274.46  | 77857.72  | 78233     | 76310.59  | 111701.1  | 86735.76  | 111834.3  | 92084.31  | 70404.03  |
| 134134.6  | 85313.87  | 73035.17  | 76038.01  | 76827.77  | 102661    | 90942.2   | 109791.7  | 93993.23  | 65845.34  |
| 126765.6  | 54897.93  | 72194.85  | 50727.92  | 45627.37  | 109227.9  | 65700.13  | 77196.03  | 61720.01  | 40502.04  |
| 131854.9  | 77646.64  | 79755.11  | 85136.78  | 81170.27  | 115229.3  | 93731.42  | 115954.7  | 102695    | 62108.02  |
| 131395.9  | 87965.38  | 78715.04  | 84373.62  | 78652.6   | 103613.8  | 89921.52  | 114987.9  | 92225.21  | 65941.92  |

|           |           |           |           |           |           |           |           |           |           |
|-----------|-----------|-----------|-----------|-----------|-----------|-----------|-----------|-----------|-----------|
| LP318.227 | LP318.228 |
| 70995.36  | 88255.95  | 94012.36  | 102560.9  | 94297.68  | 93374.88  | 68673.77  | 75587.89  | 127266.3  | 91306.16  |
| 72254.19  | 86025.81  | 103909.9  | 102404.6  | 94026.01  | 86209.85  | 65524.71  | 66264.68  | 122632.3  | 90347.48  |
| 44858.35  | 47393.75  | 67030.11  | 64468.37  | 64953.05  | 97776.77  | 49192.95  | 44712.34  | 76433.48  | 99040.02  |
| 66562.64  | 87410.12  | 104871.2  | 99980.57  | 98365.42  | 99078.68  | 65838.17  | 70501.23  | 125592.1  | 101159.2  |
| 65071.39  | 91409.2   | 98477.86  | 100682.4  | 77129.77  | 92846.52  | 65375.38  | 79418.44  | 127204.8  | 101711.4  |



|           |           |           |           |           |           |           |           |           |           |
|-----------|-----------|-----------|-----------|-----------|-----------|-----------|-----------|-----------|-----------|
| LP318.227 | LP318.227 | LP318.243 | LP318.300 | LP319.190 | LP319.190 | LP319.190 | LP319.284 | LP319.299 | LP320.170 |
| 114159.2  | 96974.31  | 80829.73  | 26363.12  | 17542.6   | 10470.3   | 13290.06  | 103625    | 35649.26  | 71942.47  |
| 115753.6  | 91757.94  | 79873.56  | 28862.25  | 18134.74  | 7754.867  | 12649.01  | 96986.71  | 31854.8   | 74264.94  |
| 74352.32  | 70053.49  | 89944.51  | 33378.17  | 24687.91  | 9104.869  | 10303.72  | 110171.1  | 32945.65  | 63980.11  |
| 110212.4  | 93386.55  | 97460.53  | 30063.35  | 24212.86  | 8452.897  | 11838.93  | 105936.6  | 27539.76  | 74915.83  |
| 107626.9  | 95546.14  | 100062.7  | 21990.45  | 26916.39  | 10372.16  | 12263.62  | 104335.4  | 34740.27  | 77682.94  |

|           |           |           |           |           |           |           |           |           |           |
|-----------|-----------|-----------|-----------|-----------|-----------|-----------|-----------|-----------|-----------|
| LP320.170 | LP320.170 | LP320.170 | LP320.2_1 | LP320.206 | LP320.206 | LP320.206 | LP320.206 | LP320.206 | LP320.206 |
| 63016.73  | 55770.02  | 91045.84  | 54391.38  | 92754.71  | 93799.96  | 82006.82  | 86957.54  | 76153.22  | 106115    |
| 66293.26  | 60148.62  | 93408.92  | 57091.22  | 77218.28  | 95274.63  | 92571.74  | 99402.8   | 70850.87  | 115337.1  |
| 70112.93  | 59308.61  | 93530.42  | 57911.71  | 75659.77  | 85834.18  | 77527.4   | 103252.6  | 72266.03  | 105930.8  |
| 71325.53  | 56941.05  | 97058.98  | 55241.98  | 79090.91  | 87402.93  | 88537.85  | 97602.82  | 71949.77  | 110398.1  |
| 77257.52  | 54860.52  | 83926.85  | 50278     | 81084.34  | 78657.87  | 84983.73  | 93557.39  | 78548.05  | 92825.5   |

|           |           |           |           |           |           |           |           |           |           |
|-----------|-----------|-----------|-----------|-----------|-----------|-----------|-----------|-----------|-----------|
| LP320.206 | LP320.207 | LP320.206 | LP320.206 | LP320.206 | LP320.206 | LP320.207 | LP320.207 | LP320.207 | LP320.207 |
| 115574.8  | 65720.07  | 69547.1   | 84599.08  | 128531.8  | 103036    | 88071.72  | 79601.46  | 91625.11  | 80257.89  |
| 108241.1  | 61127.4   | 60984.18  | 93888     | 123080.9  | 97383.15  | 92522.47  | 79047.04  | 96459.49  | 71439.44  |
| 103895.3  | 64149.45  | 65873.37  | 83275.29  | 126283.5  | 94615.62  | 92181.15  | 71135.12  | 81879.2   | 75250.9   |
| 104963.5  | 70577.19  | 69374.86  | 79972.14  | 142333.6  | 105815.9  | 87289.32  | 76659.91  | 91856.68  | 76926.26  |
| 113998.8  | 65441.61  | 61050.71  | 76960.57  | 124822.3  | 92184.62  | 96353.02  | 87140.91  | 89378.27  | 80310.34  |

|           |           |           |           |           |           |           |           |           |           |
|-----------|-----------|-----------|-----------|-----------|-----------|-----------|-----------|-----------|-----------|
| LP320.207 | LP320.206 | LP320.206 | LP320.207 | LP320.207 | LP320.292 | LP320.288 | LP320.316 | LP321.204 | LP321.279 |
| 99268.72  | 71239.32  | 160261.4  | 83793.51  | 71312.41  | 23138.82  | 15960.34  | 25611.76  | 34920.31  | 30255.82  |
| 101175.9  | 68054.7   | 144116.6  | 76980.77  | 67083.14  | 21264.09  | 18128.21  | 21296.01  | 33243.27  | 33638.55  |
| 101238.3  | 80459.48  | 143552.1  | 79236.99  | 71016.73  | 34626.07  | 17799.48  | 25155.93  | 32149.51  | 33286.86  |
| 110527.1  | 77037.48  | 150751.8  | 73070.64  | 71238.57  | 41050.78  | 14623.84  | 28774.32  | 32576.41  | 33775.49  |
| 106760.4  | 75256.97  | 144202.7  | 76536.26  | 81606.66  | 45797.07  | 17479.67  | 22387.9   | 30450.95  | 32290.7   |

|           |           |           |           |           |           |           |           |           |           |
|-----------|-----------|-----------|-----------|-----------|-----------|-----------|-----------|-----------|-----------|
| LP321.279 | LP321.278 | LP321.296 | LP321.315 | LP321.326 | LP322.186 | LP322.185 | LP322.186 | LP322.222 | LP322.222 |
| 33664.83  | 24614.96  | 38560.95  | 244621.6  | 28479.1   | 83219.57  | 111014    | 73949.68  | 69535.07  | 63832.35  |
| 35766.15  | 28973.34  | 38316.49  | 206682    | 27746.17  | 76612.84  | 108962.1  | 70599.59  | 71043.19  | 68255.6   |
| 31317.81  | 30692.06  | 34608.06  | 221322.1  | 31547.66  | 81690.85  | 110205.1  | 64626.36  | 67942.47  | 68661.67  |
| 35015.38  | 24862.38  | 34289.06  | 173351.4  | 31874.31  | 84781.74  | 118739    | 68971.32  | 67204.53  | 67921.09  |
| 29916.08  | 23280.96  | 35223.83  | 225695.5  | 29320.97  | 79730.04  | 110471    | 72850.73  | 62823.27  | 64746.5   |

|           |           |           |           |           |           |           |           |           |           |
|-----------|-----------|-----------|-----------|-----------|-----------|-----------|-----------|-----------|-----------|
| LP322.222 | LP322.222 | LP322.222 | LP322.222 | LP322.237 | LP323.146 | LP323.146 | LP323.146 | LP323.146 | LP323.146 |
| 105925.3  | 75319.15  | 119210.1  | 117019.9  | 30688.96  | 40549.03  | 54425.94  | 45425.9   | 45862.81  | 63284.9   |
| 104770.8  | 63388.26  | 117076.1  | 105035.3  | 32342.25  | 32138.51  | 39977.75  | 61484.74  | 95152.89  | 42511.6   |
| 101421.4  | 59564.92  | 120145.3  | 123673.6  | 38057.73  | 39481.23  | 61502.3   | 55519.63  | 53372.91  | 68698.37  |
| 106304.6  | 68755.58  | 128491    | 118259.6  | 35907.61  | 43131     | 48591.64  | 44559.52  | 46375.33  | 53289.55  |
| 109124.6  | 71795.97  | 129320    | 111477.8  | 39881.73  | 46032.42  | 53401.34  | 49242.53  | 46633.82  | 53996.79  |

|           |           |           |           |           |           |           |           |           |           |
|-----------|-----------|-----------|-----------|-----------|-----------|-----------|-----------|-----------|-----------|
| LP323.146 | LP323.147 | LP323.146 | LP323.147 | LP323.146 | LP323.146 | LP323.146 | LP323.146 | LP323.146 | LP323.146 |
| 61971.41  | 32172.15  | 54433.66  | 38263.66  | 54115.46  | 73747.6   | 38443.46  | 63986.84  | 47520.53  | 54933.11  |
| 47437.14  | 51301.1   | 50895.05  | 50107.68  | 56722.33  | 73659.95  | 50232.72  | 70520.12  | 59896.04  | 54986.09  |
| 55835.35  | 46557.38  | 62119.42  | 41654.34  | 64180.21  | 104522.8  | 51522.82  | 85962.71  | 66683.3   | 78231.35  |
| 54681.64  | 32540.74  | 50923.92  | 42875.52  | 47437.36  | 69717.58  | 35649.78  | 62755.37  | 46096.55  | 54740.57  |
| 56153.69  | 36407.92  | 47121.08  | 36316.11  | 55353.84  | 63906.8   | 35367.37  | 59397.03  | 43717.99  | 49602.47  |

|            |            |            |            |            |            |            |            |            |            |
|------------|------------|------------|------------|------------|------------|------------|------------|------------|------------|
| LP323.146! |
| 57968.93   | 60611.46   | 46768.36   | 50654.85   | 51101.53   | 60944.68   | 50114.4    | 54732.83   | 45309.48   | 45411.79   |
| 38780.13   | 71321.48   | 62847.51   | 83047.66   | 50587.66   | 62917.1    | 62547.87   | 55644.48   | 50008.98   | 38449.94   |
| 68371.97   | 48091.84   | 61845.34   | 46878.04   | 41404.58   | 80586.03   | 56424.96   | 78465.91   | 36710.33   | 60429.54   |
| 62417.98   | 70845.78   | 40860.4    | 44865.49   | 47356.12   | 58503.46   | 53389.78   | 52797.25   | 42980      | 46092.94   |
| 61067.6    | 75639      | 40255.65   | 46644.36   | 40097.29   | 67745.43   | 41857.7    | 54276.1    | 41290.54   | 42870.03   |



|           |           |           |           |           |           |           |           |           |           |
|-----------|-----------|-----------|-----------|-----------|-----------|-----------|-----------|-----------|-----------|
| LP323.146 | LP323.147 | LP323.147 | LP323.146 |
| 50756.45  | 44917.57  | 52897.18  | 55539.39  | 49271.07  | 34185.6   | 57149.42  | 70350.85  | 48685.93  | 60272.11  |
| 67369.12  | 69610.84  | 67870.03  | 48770.64  | 63387.74  | 39911.76  | 52415     | 69728.57  | 51481.97  | 56507.61  |
| 63039.88  | 48586.67  | 39982.26  | 54144.26  | 48261.86  | 36651.6   | 63632.21  | 46236.78  | 48672.86  | 51789.11  |
| 59450.2   | 45516.09  | 54556.53  | 64218.11  | 48561.55  | 38453.27  | 52850.54  | 65443.27  | 45979.41  | 64271.41  |
| 54857.34  | 40778.02  | 47008.34  | 58407.17  | 50719.86  | 37760.32  | 58530.58  | 61169.08  | 41098.37  | 59929.41  |

|           |           |           |           |           |           |           |           |           |           |           |
|-----------|-----------|-----------|-----------|-----------|-----------|-----------|-----------|-----------|-----------|-----------|
| LP323.146 | LP323.146 | LP323.146 | LP323.147 | LP323.146 |
| 58920.18  | 58343.55  | 55539.69  | 47662.43  | 64218.72  | 42223.64  | 39769.64  | 44926.83  | 58675.61  | 50873.82  |           |
| 63228.37  | 59638.59  | 85004.89  | 75221.55  | 79455.83  | 48146.37  | 51618.28  | 61466.49  | 53489.77  | 47217.13  |           |
| 48016.81  | 88895.57  | 64462.15  | 41092.38  | 60997.48  | 80949.48  | 64434.62  | 80366.08  | 52812.56  | 51971.28  |           |
| 60223.23  | 53197.12  | 57460.35  | 48304.29  | 64419.09  | 41270     | 41470.67  | 43652.71  | 57309.81  | 54067.62  |           |
| 60284.88  | 54963.43  | 55743.79  | 42330.46  | 57547.43  | 39580.07  | 40161.01  | 39296.3   | 57464.51  | 51127.4   |           |

|           |           |           |           |           |           |           |           |           |           |           |
|-----------|-----------|-----------|-----------|-----------|-----------|-----------|-----------|-----------|-----------|-----------|
| LP323.147 | LP323.146 | LP323.146 | LP323.147 | LP323.146 |
| 50842.9   | 47688.21  | 42552.89  | 43390.58  | 48172.88  | 51700.63  | 62014.59  | 44344.7   | 53543.3   | 54440.48  |           |
| 54967.55  | 49491.51  | 56787     | 52396.1   | 56358.93  | 56055.17  | 65077.99  | 43701.49  | 49055.63  | 57232.66  |           |
| 61771.71  | 50190.17  | 69274.14  | 85714.77  | 40821.84  | 48882.14  | 53462.17  | 53436.84  | 54617.21  | 44565.89  |           |
| 44930.81  | 41630.16  | 35201.18  | 40765.74  | 49825.26  | 54746.12  | 51979.84  | 39402.96  | 46543.84  | 46678.85  |           |
| 53114.06  | 47022.13  | 47021.51  | 42112.24  | 41640.81  | 50738.71  | 52382.42  | 36396.56  | 46023.82  | 51917.2   |           |

|           |           |           |           |           |           |           |           |           |           |
|-----------|-----------|-----------|-----------|-----------|-----------|-----------|-----------|-----------|-----------|
| LP323.146 | LP323.146 | LP323.146 | LP323.147 | LP323.146 | LP323.147 | LP323.147 | LP323.146 | LP323.146 | LP323.146 |
| 58799.77  | 37935.05  | 56315.12  | 37085.44  | 59196.23  | 48228.89  | 55784.5   | 58719.61  | 48409.27  | 44716.51  |
| 65310.21  | 33891.01  | 55646.68  | 43341.11  | 56287.98  | 44108.88  | 58549.58  | 59940.04  | 49546.08  | 38334.3   |
| 51595.22  | 47177.11  | 61633.66  | 38917.52  | 89467.3   | 65590.6   | 67231.48  | 45327.72  | 60488.66  | 48835.04  |
| 55172.4   | 37227.61  | 48870.93  | 42136.89  | 52525.16  | 46762.74  | 54778.39  | 66436.96  | 50882.71  | 46818.78  |
| 56415.67  | 35017.38  | 51318.72  | 39632.3   | 51852.86  | 44748.33  | 56883.11  | 58124.41  | 44336.11  | 38304.31  |

|           |           |           |           |           |           |           |           |           |           |
|-----------|-----------|-----------|-----------|-----------|-----------|-----------|-----------|-----------|-----------|
| LP323.146 | LP323.146 | LP323.146 | LP323.147 | LP323.146 | LP323.146 | LP323.146 | LP323.147 | LP323.146 | LP323.147 |
| 47937.56  | 39277.43  | 67254.01  | 53339.7   | 33828.41  | 62918.08  | 65618.31  | 51181.86  | 43531.26  | 31995.17  |
| 80261.44  | 31526.21  | 71896.83  | 45418.65  | 52082.96  | 66956.74  | 61173.94  | 62405.32  | 55527.85  | 39112.84  |
| 65920.57  | 40707.55  | 71221.92  | 58063.15  | 34589.88  | 85807.08  | 57621.97  | 51780.15  | 68820.07  | 25574.7   |
| 48106.84  | 37803.13  | 53041.43  | 45902.15  | 42662.23  | 58852.84  | 67746.92  | 57028.84  | 38142.29  | 36502.69  |
| 47152.74  | 34292.45  | 57123.84  | 55582.41  | 31802.6   | 63940.05  | 65599.54  | 55344.79  | 43113.63  | 30382.93  |

|           |           |           |           |           |           |           |           |           |           |
|-----------|-----------|-----------|-----------|-----------|-----------|-----------|-----------|-----------|-----------|
| LP323.146 | LP323.147 | LP323.146 | LP323.146 | LP323.146 | LP323.147 | LP323.147 | LP323.146 | LP323.146 | LP323.146 |
| 57621.14  | 49053.17  | 63247.1   | 58110.89  | 37046.87  | 34080.6   | 35314.93  | 59686.18  | 36403     | 51985.28  |
| 54493.1   | 49815.3   | 71236.84  | 62039.32  | 39674.76  | 45455.68  | 24682.55  | 61425.18  | 50294.32  | 60182.79  |
| 46330.91  | 76761.64  | 48944.31  | 97619.82  | 39862.06  | 35830.41  | 37153.23  | 63916.94  | 29397.42  | 51074.33  |
| 64399.51  | 50153.93  | 57300.43  | 53530.91  | 37916.31  | 35122.22  | 37552.83  | 66190.67  | 39514.04  | 56684.39  |
| 59679.4   | 51075.94  | 56138.26  | 54822.76  | 34239.94  | 29795.32  | 33332.78  | 65447.73  | 34469.18  | 53903.04  |

|           |           |           |           |           |           |           |           |           |           |
|-----------|-----------|-----------|-----------|-----------|-----------|-----------|-----------|-----------|-----------|
| LP323.184 | LP323.185 |
| 42180     | 43568.58  | 44877.87  | 58229.66  | 44622.64  | 40711.7   | 41525.78  | 60467.64  | 50003.75  | 68067.97  |
| 35963.87  | 42939.64  | 41630.5   | 49188.7   | 40852.63  | 41511.5   | 45338.15  | 61345.37  | 45822.21  | 70189.77  |
| 40808.99  | 47151.84  | 42202.82  | 54111.61  | 44037.68  | 45077.01  | 41497.41  | 58759.65  | 51889.15  | 75058.27  |
| 38117.53  | 45438.22  | 40707.57  | 52284.52  | 46231.63  | 42538.95  | 40717.51  | 53623.52  | 50397.04  | 68460.63  |
| 36743.86  | 46991.37  | 42219.56  | 52208.72  | 44533.56  | 40775.98  | 46559.17  | 58320.69  | 47369.67  | 67588.93  |

|           |           |           |           |           |           |           |           |           |           |
|-----------|-----------|-----------|-----------|-----------|-----------|-----------|-----------|-----------|-----------|
| LP323.184 | LP323.184 | LP323.185 | LP323.184 | LP323.184 | LP323.184 | LP323.184 | LP323.184 | LP323.185 | LP323.185 |
| 51386.97  | 44358.48  | 47366.53  | 42473.53  | 53801.97  | 38173.2   | 38182.5   | 35308.77  | 39179.28  | 67018.42  |
| 51924.47  | 45200.93  | 52361.59  | 46966.76  | 51688.45  | 38223.81  | 38796.95  | 33169.22  | 38943.81  | 69734.89  |
| 52008.62  | 43262.55  | 48784.94  | 47809.76  | 51139.35  | 37352.61  | 37853.31  | 33828.19  | 39096.51  | 66798.8   |
| 57552.3   | 45568.44  | 48658.9   | 43308.71  | 48830.23  | 37278.55  | 39827.97  | 32976.92  | 40951.28  | 65279.47  |
| 54081.6   | 45477.58  | 51969.43  | 49368.09  | 53409.74  | 38495.6   | 35928.02  | 37053.34  | 40878.58  | 66210.25  |



|           |           |           |           |           |           |           |           |           |           |
|-----------|-----------|-----------|-----------|-----------|-----------|-----------|-----------|-----------|-----------|
| LP323.196 | LP323.221 | LP323.225 | LP323.241 | LP323.257 | LP323.257 | LP323.257 | LP323.257 | LP323.294 | LP323.294 |
| 29854.74  | 50803.7   | 79925.56  | 21310.47  | 74785     | 79523.58  | 80162.58  | 55157.65  | 87902.77  | 27453.39  |
| 31632.34  | 51287.43  | 74617     | 20449.72  | 65860.7   | 71838.54  | 61368.8   | 39334.65  | 92695.68  | 30882.33  |
| 29288.73  | 48517.32  | 74711.73  | 18672.3   | 87495.89  | 78122.84  | 80013.65  | 57608.42  | 90934.3   | 28364.91  |
| 30130.95  | 50375.67  | 58210.72  | 21157.57  | 83506.81  | 73083.85  | 77942.86  | 52451.49  | 85885.12  | 25983.57  |
| 30688.15  | 53607.45  | 69742.05  | 17351.16  | 84246.41  | 68411.27  | 78730.73  | 60469.2   | 89842.39  | 32087.28  |

|           |           |           |           |           |           |           |           |           |           |
|-----------|-----------|-----------|-----------|-----------|-----------|-----------|-----------|-----------|-----------|
| LP323.294 | LP323.294 | LP323.342 | LP324.202 | LP324.202 | LP324.202 | LP324.202 | LP324.201 | LP324.202 | LP324.201 |
| 67846.8   | 36665.97  | 52507.77  | 118759.8  | 252761.8  | 580109.1  | 451752.3  | 94332.24  | 130489.9  | 612204.4  |
| 62204.49  | 33334.56  | 50896.39  | 620779.3  | 940588.5  | 518690.3  | 496871.5  | 529045.5  | 247511    | 561526.2  |
| 62909.18  | 42069.03  | 47264.21  | 714603.7  | 876282.2  | 484881.6  | 478778.7  | 555274    | 232549.7  | 634146.6  |
| 61382.93  | 29290.58  | 46945.42  | 87342.07  | 873509    | 579614.5  | 426553.8  | 629289.7  | 261929.2  | 680094.2  |
| 64734.12  | 33096.67  | 42960.19  | 638376.2  | 799852    | 507440.2  | 452083.2  | 533219.2  | 268134.1  | 633705.2  |

|            |           |           |           |           |           |           |           |            |           |
|------------|-----------|-----------|-----------|-----------|-----------|-----------|-----------|------------|-----------|
| LP324.202! | LP324.202 | LP324.202! | LP324.202 |
| 112266.2   | 483076.3  | 112876.5  | 475294.8  | 202705.2  | 656003.8  | 397882.6  | 92590.91  | 128924.9   | 153650.4  |
| 444149.2   | 469408.6  | 479520.7  | 497745.5  | 192989.8  | 664540.3  | 431949.9  | 942733.2  | 1015485    | 404869.5  |
| 481233     | 530704.2  | 482586.5  | 496172.3  | 193108.7  | 655997.4  | 430505.6  | 895343.1  | 1134149    | 371752.7  |
| 435192.8   | 494638    | 490879.5  | 450934.4  | 210885.6  | 679312.1  | 428824.4  | 897814.1  | 207871.3   | 402655.1  |
| 481136.5   | 536655.5  | 486813.7  | 462926.1  | 196985.4  | 678944.2  | 451658.7  | 854416.4  | 213341.7   | 363159.5  |

|           |           |           |           |           |           |           |           |           |           |
|-----------|-----------|-----------|-----------|-----------|-----------|-----------|-----------|-----------|-----------|
| LP324.202 | LP324.202 | LP324.203 | LP324.203 | LP324.203 | LP324.217 | LP324.326 | LP324.326 | LP324.326 | LP324.326 |
| 147113.6  | 183507    | 69618.28  | 435355    | 773927    | 1334220   | 126176.3  | 94812.63  | 88869.01  | 106007.4  |
| 851035.1  | 782021.6  | 551817.6  | 433612.7  | 755590.5  | 1338089   | 118469.6  | 87640.72  | 84381.96  | 91547.78  |
| 880490.6  | 807735.5  | 577267.7  | 412808.3  | 786522.2  | 1364074   | 119137    | 102199.7  | 85628.31  | 109627.8  |
| 879415    | 862229.6  | 549507.1  | 423690.1  | 760405.3  | 1374457   | 110476.8  | 87156.21  | 85009.28  | 93344.56  |
| 824522.8  | 783907.1  | 554018.9  | 423848.8  | 792624.5  | 1377062   | 116607.1  | 112961.5  | 68315.23  | 115100.7  |

|           |           |           |           |           |           |           |           |           |           |
|-----------|-----------|-----------|-----------|-----------|-----------|-----------|-----------|-----------|-----------|
| LP324.326 | LP325.098 |
| 116112.2  | 100711.2  | 84583.44  | 97683.66  | 95322.42  | 94500.27  | 75224.64  | 92191.18  | 69892.2   | 32230.76  |
| 109211.1  | 96230.06  | 91606.94  | 97127.43  | 91055.36  | 96938.43  | 70713     | 103612.5  | 77337.91  | 28738.16  |
| 110799.5  | 96010.16  | 83291.64  | 98442.66  | 100806.9  | 94948.81  | 70929.16  | 93492.32  | 76574.1   | 33332.23  |
| 112875.4  | 100516.9  | 85448.21  | 101339    | 91332.19  | 92215.84  | 69059.92  | 93878.85  | 67436.9   | 31565.1   |
| 115217.3  | 97853.27  | 83059.02  | 106365.5  | 101277.4  | 94906.53  | 66418.75  | 89561.4   | 69869.78  | 28510.34  |

|           |           |           |           |           |           |           |           |           |           |
|-----------|-----------|-----------|-----------|-----------|-----------|-----------|-----------|-----------|-----------|
| LP325.162 |
| 88307.97  | 92224.6   | 121407.5  | 83814.92  | 73901.16  | 151175.4  | 88585.09  | 87439.07  | 122092.4  | 110484.9  |
| 83598.49  | 124970.1  | 71905.98  | 129473.1  | 191906.4  | 162235.4  | 132847.7  | 91843.95  | 90010.9   | 118047.4  |
| 68204.56  | 131522.6  | 67604.97  | 105347.5  | 139335.7  | 160535.6  | 110049.4  | 164887.5  | 123740.1  | 154262.6  |
| 82898.68  | 83565.03  | 118633.2  | 76937     | 150629.5  | 126058.9  | 79393.46  | 94985.91  | 101176.3  | 180493.8  |
| 82077.35  | 100061.2  | 94208.28  | 117007.8  | 124847.1  | 125457.2  | 115031.6  | 88631.89  | 72640.31  | 94280.52  |

|           |           |           |           |           |           |           |           |           |           |
|-----------|-----------|-----------|-----------|-----------|-----------|-----------|-----------|-----------|-----------|
| LP325.162 |
| 89384.36  | 63026.32  | 85677.55  | 108518.6  | 89343.75  | 119891.9  | 75727.18  | 72659.82  | 113648    | 79140.29  |
| 107763.7  | 82633.13  | 60972.59  | 94687.02  | 98606.62  | 110364.4  | 134422.1  | 62762.44  | 78468.23  | 73731.6   |
| 91091.02  | 95558.06  | 64693.95  | 119511    | 98324.35  | 209748.9  | 120641.7  | 118668.1  | 91434.19  | 80232.11  |
| 99400.04  | 111742.9  | 53683.98  | 131540.9  | 102131.6  | 117897.2  | 116419.1  | 114932.3  | 102228.2  | 103872.9  |
| 96807.17  | 63795.18  | 72371.61  | 117945.5  | 103100.9  | 129109.5  | 92914.33  | 91838.83  | 126975.4  | 87650.43  |

|           |           |           |           |           |           |           |           |           |           |
|-----------|-----------|-----------|-----------|-----------|-----------|-----------|-----------|-----------|-----------|
| LP325.162 |
| 84822.49  | 78612.86  | 151987.4  | 66544.22  | 101036.2  | 125111.4  | 158473.1  | 85570.72  | 132987.9  | 104020.5  |
| 103472.8  | 60332.18  | 97288.29  | 122643.9  | 100086.8  | 112425.3  | 92870.61  | 81112.96  | 101844.2  | 137455.2  |
| 81648.26  | 113811.9  | 89357.44  | 58932.92  | 84216.59  | 78843.6   | 114329.8  | 77789.02  | 80806.91  | 139699.4  |
| 100817.4  | 100683.2  | 109100.4  | 113764.4  | 85712.32  | 143923.6  | 119515.9  | 120663.6  | 125227.8  | 82275.32  |
| 75875.51  | 77386.36  | 85122.12  | 48646.56  | 108947.9  | 80040.36  | 96898.96  | 70014.46  | 153676.3  | 67303.26  |



|           |           |           |           |           |           |           |           |           |           |
|-----------|-----------|-----------|-----------|-----------|-----------|-----------|-----------|-----------|-----------|
| LP325.162 |
| 95594.19  | 119673.8  | 101167.9  | 135708.9  | 156656.2  | 156880.2  | 76368.49  | 73809.28  | 123010.7  | 89299.83  |
| 109482.6  | 123357.7  | 101214.6  | 86229.54  | 90387     | 165769.5  | 70374.11  | 143513.9  | 137476.7  | 84623.02  |
| 78518.02  | 114350.5  | 95294.91  | 106622.3  | 124794.7  | 178185    | 115776.5  | 108141    | 100941.2  | 73377.15  |
| 98478.31  | 119468.7  | 81543.69  | 135082.5  | 147233.8  | 114355.4  | 87710.16  | 79383.7   | 115678.2  | 129314.8  |
| 91775.03  | 114434.2  | 169393.8  | 103202.5  | 97231.87  | 123442.8  | 83180.48  | 113922.7  | 104111.3  | 71240.18  |

|           |           |           |           |           |           |           |           |           |           |
|-----------|-----------|-----------|-----------|-----------|-----------|-----------|-----------|-----------|-----------|
| LP325.162 |
| 89741.18  | 130501.8  | 126303.9  | 89633.06  | 138458.7  | 91136.72  | 124895.2  | 111914.6  | 77836.04  | 53175.62  |
| 100088.7  | 111522.7  | 106775.1  | 145070.6  | 134788.1  | 137218.4  | 75645.85  | 75678.26  | 77320.9   | 78647.77  |
| 118246.4  | 91388.02  | 91538.04  | 80267.16  | 85203.92  | 73236.69  | 78377.81  | 119854.2  | 69768.39  | 87870.19  |
| 97820.52  | 91546.27  | 121597.8  | 93104.43  | 115037.8  | 123374.2  | 107242    | 118171.8  | 61485.76  | 87431.58  |
| 82220.14  | 96701.47  | 118086.8  | 112326.7  | 86238.14  | 93593.79  | 99790.97  | 93456.94  | 69705.84  | 59432.32  |

|           |           |           |           |           |           |           |           |           |           |
|-----------|-----------|-----------|-----------|-----------|-----------|-----------|-----------|-----------|-----------|
| LP325.162 |
| 98115.17  | 113062.4  | 126635.3  | 125140.7  | 111987.4  | 147221.5  | 154106.3  | 133851.6  | 105906.5  | 155762.7  |
| 99141.69  | 134032.7  | 104837    | 106526.8  | 106672.1  | 77108.9   | 108725.9  | 136851.9  | 84137.16  | 156775.1  |
| 81758.33  | 80655.65  | 132251.9  | 87919.16  | 103486.8  | 83930.16  | 98098.1   | 111937.7  | 177498    | 70797.04  |
| 85703.18  | 112659.9  | 114312.5  | 112917.6  | 83283.44  | 61914.01  | 106324.6  | 109912    | 100094.4  | 98185.82  |
| 105079.6  | 134936    | 112666.3  | 93387.98  | 82068.49  | 146771.4  | 170655.7  | 163397.3  | 108742.1  | 76082.63  |

|           |           |           |           |           |           |           |           |           |           |
|-----------|-----------|-----------|-----------|-----------|-----------|-----------|-----------|-----------|-----------|
| LP325.162 |
| 117036.2  | 80355.93  | 102174.3  | 92141.37  | 62441.1   | 85630.36  | 127174.5  | 120305.7  | 72481.34  | 106357.2  |
| 149062.7  | 119872.6  | 111552.5  | 104288    | 97301.87  | 131347.6  | 140337    | 130964.8  | 161273.7  | 82855.46  |
| 145966.6  | 94347.93  | 93381.68  | 121633.1  | 104925.5  | 98886.45  | 84024.19  | 125089.2  | 89774.8   | 141463.6  |
| 109165.6  | 140963.4  | 110920.3  | 73060.3   | 92717.32  | 85147.46  | 68652.76  | 139537.8  | 71669.94  | 148973.7  |
| 105930.2  | 76833.73  | 101524.5  | 125026    | 114722.5  | 98675.02  | 159777    | 126149.7  | 77711.2   | 97456.12  |

|           |           |           |           |           |           |           |           |           |           |
|-----------|-----------|-----------|-----------|-----------|-----------|-----------|-----------|-----------|-----------|
| LP325.162 |
| 130552.3  | 95735.48  | 125317.3  | 216089.2  | 173316.2  | 154605.3  | 51490.95  | 88096.14  | 39428.57  | 85361.86  |
| 74010.91  | 56933.95  | 83741.15  | 215846.9  | 180331.8  | 159541.9  | 68719.21  | 127589    | 117795.9  | 122875.6  |
| 116653.9  | 47714.8   | 139975.5  | 232278.9  | 135913.7  | 69611.72  | 120259.9  | 120421.1  | 64900.97  | 150912.7  |
| 145629.8  | 54857.69  | 83617.04  | 70769.76  | 105420.6  | 95531.6   | 68829.84  | 49406.17  | 133539.1  | 159811.6  |
| 109074.1  | 86985.73  | 87929.71  | 226426.5  | 135819.7  | 116204.9  | 63122.23  | 114150    | 130587.2  | 152756.1  |

|           |           |           |           |           |           |           |           |           |           |
|-----------|-----------|-----------|-----------|-----------|-----------|-----------|-----------|-----------|-----------|
| LP325.163 | LP325.162 | LP325.163 | LP325.200 | LP325.200 | LP325.200 | LP325.201 | LP325.220 | LP325.220 | LP325.220 |
| 146071.3  | 103934.1  | 208379.5  | 113882    | 78404.06  | 94417.18  | 78232.13  | 203259.2  | 139801.1  | 134588.9  |
| 147348    | 101618.7  | 202794.2  | 119617    | 77332.54  | 100617.1  | 76060.45  | 298982.4  | 126070.3  | 133078.7  |
| 140092.6  | 100607.7  | 211127.8  | 116933.8  | 90795.52  | 96500.03  | 77159.98  | 256793.4  | 182630.1  | 177443.1  |
| 132765.5  | 101653.2  | 210284.4  | 112738.9  | 79580.68  | 102076.9  | 70686.77  | 282350.4  | 133340.7  | 135912.3  |
| 132668.6  | 107143    | 190914.5  | 109890.4  | 79253.19  | 96871.58  | 77501.15  | 151682.4  | 134961.9  | 155107.2  |

|           |           |           |           |           |           |           |           |           |           |
|-----------|-----------|-----------|-----------|-----------|-----------|-----------|-----------|-----------|-----------|
| LP325.220 |
| 126841.7  | 161660.3  | 114718.9  | 125449.2  | 130834.2  | 172700.2  | 114554.8  | 177731.8  | 146054.3  | 157394.1  |
| 124347.5  | 173815    | 113100.2  | 117321.3  | 128612    | 142378.9  | 121183.7  | 182336.7  | 159611.9  | 160635    |
| 124254.3  | 182059.6  | 124078.5  | 114015    | 105505.5  | 158333    | 187814    | 153010.6  | 203073.4  | 142440.3  |
| 99151.19  | 171769.6  | 97375.98  | 131629.7  | 116722.7  | 132983.1  | 147527.2  | 201888.7  | 175622.8  | 193872.4  |
| 125725.3  | 152765.9  | 119306.7  | 133189.7  | 122686.2  | 141796.2  | 97091.45  | 187845.9  | 168893.1  | 147440.2  |

|           |           |           |           |           |           |           |           |           |           |
|-----------|-----------|-----------|-----------|-----------|-----------|-----------|-----------|-----------|-----------|
| LP325.220 |
| 161198.8  | 120097.7  | 112365.4  | 138950.7  | 127210.6  | 140044.1  | 140629.2  | 168132.5  | 141827.6  | 143417.7  |
| 157376.8  | 123087.4  | 109128.5  | 139954.2  | 138450.3  | 142003    | 162740.5  | 178507    | 145594.5  | 140516.7  |
| 163518.2  | 113934.7  | 137868.5  | 167651.7  | 136297.2  | 227245.2  | 159660.7  | 163505.4  | 160791.9  | 149920.3  |
| 146911    | 128278.2  | 139739.1  | 132218.9  | 132805.1  | 137130.3  | 140463.1  | 144638.5  | 138902.6  | 151432.1  |
| 147085.3  | 121291.8  | 113968.8  | 138859.6  | 126196.3  | 123057.6  | 140729    | 163097    | 138349.6  | 133874.7  |



|           |           |           |           |           |           |           |           |           |           |
|-----------|-----------|-----------|-----------|-----------|-----------|-----------|-----------|-----------|-----------|
| LP325.220 |
| 118327.7  | 137109.9  | 168818.5  | 128431.4  | 148069.2  | 123516.3  | 154088.1  | 187267    | 125510    | 142592.1  |
| 121433.8  | 124554.4  | 189995.1  | 132025    | 151674.9  | 122471.1  | 144790.6  | 186349.7  | 115472.8  | 123151.7  |
| 129569.1  | 139271.5  | 163780.8  | 216256.2  | 130363.8  | 139467.4  | 155200.3  | 171906.8  | 121645.7  | 92559.46  |
| 124301.5  | 140368.2  | 205090.8  | 162549.4  | 133247.2  | 118471.9  | 153527.7  | 183692.8  | 124252.3  | 147895.9  |
| 124691.2  | 126648.8  | 190282.7  | 111378.2  | 134782.9  | 118188.9  | 148986.7  | 173965.6  | 114541.9  | 130502.5  |

|           |           |           |           |           |           |           |           |           |           |
|-----------|-----------|-----------|-----------|-----------|-----------|-----------|-----------|-----------|-----------|
| LP325.220 |
| 141795.3  | 115349.4  | 110569.1  | 112040.1  | 116190.2  | 97580.39  | 177338.8  | 122078.3  | 127784.1  | 110480.2  |
| 143331    | 105819.1  | 93748.79  | 114260    | 132936.2  | 95936     | 167006.8  | 113115.8  | 124163.7  | 118305.6  |
| 155295.5  | 156042.3  | 97253.04  | 221791.6  | 111869.1  | 100641    | 112604.3  | 167588    | 151899.1  | 150049.4  |
| 159459.5  | 103633.5  | 89950.63  | 113088.1  | 157643.2  | 87453.39  | 256019.2  | 119997.7  | 148302.9  | 105512.5  |
| 139342.5  | 114096.5  | 84143.22  | 106984.6  | 109012.9  | 99436.85  | 157889.9  | 125650.2  | 131727.5  | 106516.2  |

|           |           |           |           |           |           |           |           |           |           |
|-----------|-----------|-----------|-----------|-----------|-----------|-----------|-----------|-----------|-----------|
| LP325.220 | LP325.220 | LP325.220 | LP325.220 | LP325.220 | LP325.220 | LP325.221 | LP325.221 | LP325.221 | LP325.220 |
| 98800.78  | 107316.6  | 126915.3  | 141131.8  | 135396.9  | 106854.3  | 90025.25  | 80251.81  | 94869.8   | 161496.1  |
| 118250.9  | 104582.3  | 115996.9  | 140874.4  | 140099.3  | 112263.1  | 91987.62  | 84233.73  | 90820.42  | 147684.5  |
| 113557.4  | 115626.4  | 117428.5  | 142852.2  | 147270.8  | 121696.4  | 82412.12  | 81851.03  | 94792.5   | 134720.1  |
| 152257    | 114534.9  | 117182.4  | 168494.2  | 145421.7  | 124078.9  | 84632.37  | 81289.32  | 93942.8   | 160157.1  |
| 105630.7  | 112743.8  | 113941.5  | 135450.6  | 148928.4  | 116620.8  | 92760.15  | 84159.36  | 98748.57  | 144904.8  |

|           |           |           |           |           |           |           |           |           |           |
|-----------|-----------|-----------|-----------|-----------|-----------|-----------|-----------|-----------|-----------|
| LP325.220 | LP325.221 | LP325.220 | LP325.220 | LP325.220 | LP325.221 | LP325.220 | LP325.220 | LP325.220 | LP325.220 |
| 143316.5  | 122190.3  | 134200.2  | 151455.4  | 109642.7  | 89356.6   | 114011.3  | 177606.9  | 167531.6  | 99985.89  |
| 136981.7  | 130210.2  | 136636    | 161772.1  | 110343.9  | 94014.1   | 109649.4  | 178133.9  | 177746.2  | 100656.9  |
| 174350.9  | 80650.62  | 143083.6  | 147692.4  | 108467.1  | 89827.01  | 141357.4  | 172554.8  | 175439.4  | 75065.33  |
| 176329.9  | 128714.9  | 148941.1  | 151200.9  | 118064.7  | 90464.68  | 112948.9  | 221288    | 190112.2  | 101406.8  |
| 119053.6  | 135840.2  | 140130.7  | 146266.5  | 111884.8  | 95739.38  | 126778.1  | 164837.7  | 159621.5  | 102613.2  |

|           |           |           |           |           |           |           |           |           |           |
|-----------|-----------|-----------|-----------|-----------|-----------|-----------|-----------|-----------|-----------|
| LP325.220 | LP325.220 | LP325.220 | LP325.221 | LP325.220 | LP325.220 | LP325.235 | LP325.234 | LP325.235 | LP325.235 |
| 155529.7  | 129039.2  | 108554.7  | 109680.8  | 88457.7   | 90257.68  | 57588.93  | 78275.44  | 102149    | 85843.21  |
| 155508.7  | 127253.5  | 114155.1  | 105196.2  | 88438.38  | 87791.53  | 174706.9  | 139790.9  | 93258.2   | 76611.92  |
| 167397.6  | 131308.4  | 101565.7  | 107285.8  | 94301.11  | 64904.98  | 188568.2  | 153333.4  | 101895.5  | 74220.52  |
| 158280    | 143132.8  | 116656.5  | 112291    | 85895.79  | 93531.32  | 207653.5  | 140884.8  | 92505.99  | 88150.03  |
| 147162.7  | 130130.4  | 114221.2  | 104586.1  | 96645.05  | 86409.11  | 91047.17  | 65953.86  | 82860.75  | 69922.8   |

|           |           |           |           |           |           |           |           |           |           |
|-----------|-----------|-----------|-----------|-----------|-----------|-----------|-----------|-----------|-----------|
| LP325.235 |
| 83097.26  | 69725.27  | 65997.11  | 134042.1  | 66371.63  | 56719.04  | 77890.02  | 49976.37  | 68255.57  | 65607.07  |
| 88570.89  | 99685.48  | 67541.73  | 129520.5  | 79306.48  | 90036.93  | 87900.48  | 112966.9  | 133763.3  | 125393.5  |
| 90781.46  | 100901.5  | 68405.18  | 150095.2  | 72004.4   | 88513.76  | 90695.66  | 123249.2  | 154382.1  | 154519.1  |
| 91724.1   | 96797.54  | 66644     | 151795.1  | 76776.98  | 93078.68  | 96688.86  | 124193.8  | 155248.6  | 157361    |
| 67614.89  | 72489.75  | 62899.55  | 66210.77  | 96893.08  | 83418.38  | 88332.94  | 59279.59  | 69802.72  | 62215.61  |

|           |           |           |           |           |           |           |           |           |           |
|-----------|-----------|-----------|-----------|-----------|-----------|-----------|-----------|-----------|-----------|
| LP325.235 |
| 101076.4  | 64909.58  | 74579.48  | 63578.05  | 71793.3   | 58320.53  | 53347.73  | 59551.64  | 58872.62  | 86111.22  |
| 102357.2  | 98919.51  | 64836.56  | 102516.4  | 98168.75  | 104977.2  | 161444    | 90431.14  | 125818.5  | 123745    |
| 107718.7  | 99967.39  | 68009.61  | 111318.7  | 107669.4  | 101196.6  | 161770.9  | 95800.83  | 128574    | 132038.2  |
| 128653.8  | 102013.9  | 60486.07  | 108045.1  | 104319.1  | 107493.8  | 179763    | 100299.6  | 145893.8  | 138296    |
| 84991.78  | 109142.8  | 86442.5   | 80396.86  | 91961.26  | 79918.07  | 76298.87  | 85938.56  | 53767.32  | 89743.37  |

|           |           |           |           |           |           |           |           |           |           |
|-----------|-----------|-----------|-----------|-----------|-----------|-----------|-----------|-----------|-----------|
| LP325.235 |
| 107077.5  | 67243.4   | 136415    | 52738.38  | 105904.4  | 144501.9  | 104109.9  | 114557.8  | 87417.58  | 122751.9  |
| 99878.81  | 118227.8  | 134545.9  | 170234.2  | 115720.1  | 153180.1  | 101768.8  | 118635.1  | 203798.1  | 125897.8  |
| 103486.6  | 128791.1  | 141612.1  | 170126.8  | 105569.3  | 163629    | 98542.85  | 108506.2  | 217918.8  | 132372.7  |
| 111825.2  | 134925.6  | 154246.3  | 162311.6  | 108504.7  | 160233.8  | 101938.8  | 121802.3  | 224400.1  | 119436.5  |
| 58890.43  | 57248.91  | 85770.9   | 53602.07  | 88970.16  | 70265.78  | 45051.71  | 130654.5  | 70989.61  | 125283.7  |



|           |           |           |           |           |           |           |           |           |           |
|-----------|-----------|-----------|-----------|-----------|-----------|-----------|-----------|-----------|-----------|
| LP325.235 |
| 57538.86  | 43262.78  | 72244.06  | 44503.27  | 105346.6  | 45475.28  | 47882.14  | 46170.1   | 76106.09  | 63741.53  |
| 99102.27  | 113009.1  | 129649.3  | 146296.3  | 112788.8  | 143446.4  | 137795.3  | 176107.4  | 87822.29  | 130343.2  |
| 109334.7  | 119232.4  | 139578.9  | 145654.7  | 116454    | 154163.2  | 149613.2  | 166398.1  | 87039.98  | 148466.6  |
| 104472    | 123144.7  | 143343    | 158748.5  | 116457.9  | 160679.1  | 154695.6  | 171698.8  | 84553.83  | 135294.4  |
| 97546.16  | 44817.97  | 78449.38  | 45091.41  | 118929    | 82122.03  | 155472.3  | 51736.23  | 89297.81  | 75082.42  |

|           |           |           |           |           |           |           |           |           |           |           |
|-----------|-----------|-----------|-----------|-----------|-----------|-----------|-----------|-----------|-----------|-----------|
| LP325.235 |
| 54676.73  | 49895.24  | 111492    | 82081.56  | 51734.51  | 159900.8  | 128646.8  | 124993    | 70880.43  | 36341.69  |           |
| 132547.6  | 136312.9  | 107572.7  | 95576.43  | 154503.4  | 181136.1  | 125244.5  | 138219.1  | 179491.6  | 121953.6  |           |
| 147578    | 138029.8  | 113779.9  | 97728.71  | 150767.1  | 171210.7  | 127426.1  | 144372.8  | 190061.3  | 135222.3  |           |
| 152814.7  | 137331.3  | 122391.6  | 92844.36  | 158591.1  | 181604.8  | 139801.1  | 134841    | 178243.2  | 114117.8  |           |
| 153250.8  | 54645.54  | 123902.5  | 59097.38  | 54372.99  | 46426.74  | 25723.69  | 34684.01  | 176248.8  | 111864.1  |           |

|           |           |           |           |           |           |           |           |           |           |
|-----------|-----------|-----------|-----------|-----------|-----------|-----------|-----------|-----------|-----------|
| LP325.235 | LP325.235 | LP325.235 | LP325.236 | LP325.235 | LP325.235 | LP325.235 | LP325.235 | LP325.235 | LP325.235 |
| 145488    | 173664.9  | 122633.6  | 46193.96  | 85315.94  | 65199.25  | 115339.6  | 134107.5  | 154757.2  | 140221.5  |
| 144984.7  | 161173.8  | 127216.2  | 136983.2  | 76882.91  | 151851.4  | 115328.9  | 146979.7  | 165332.8  | 149501.3  |
| 166242.9  | 175046.8  | 144331    | 137602.4  | 83019.94  | 131415.7  | 117547.6  | 145072.4  | 167338.5  | 153130    |
| 167793.8  | 191549.4  | 148380.8  | 139137.6  | 97563.45  | 156618.1  | 117639.7  | 139200    | 171887.1  | 144335.2  |
| 73732.32  | 178956    | 54949.47  | 130644.4  | 85795.53  | 142266.1  | 126168    | 138537.1  | 65474.11  | 49840     |

|           |           |           |           |           |           |           |           |           |           |
|-----------|-----------|-----------|-----------|-----------|-----------|-----------|-----------|-----------|-----------|
| LP325.235 | LP325.235 | LP325.235 | LP325.236 | LP325.236 | LP325.235 | LP325.235 | LP325.235 | LP325.235 | LP325.235 |
| 53564.08  | 118987.9  | 120688.2  | 112966.1  | 107096    | 100072    | 126062.1  | 176483.3  | 134373.7  | 140400.2  |
| 147718.6  | 122117.8  | 116406.7  | 104547.3  | 101324    | 101875.1  | 121393.8  | 173989.7  | 148228.8  | 155158    |
| 153906.9  | 134022.6  | 129501.6  | 113397.7  | 111785.6  | 102071.4  | 123996.5  | 166850.3  | 117646.2  | 154089.4  |
| 155195.6  | 137889.5  | 126272.7  | 103902.4  | 106515.2  | 101070    | 125869.8  | 176355.6  | 133677.3  | 145818.5  |
| 144778.2  | 56097.5   | 61767.66  | 95186.63  | 106881.5  | 101821.2  | 109843.5  | 170257.9  | 122535.7  | 160171.9  |

|           |           |           |           |           |           |           |           |           |           |
|-----------|-----------|-----------|-----------|-----------|-----------|-----------|-----------|-----------|-----------|
| LP325.274 | LP325.274 | LP325.274 | LP325.274 | LP325.274 | LP325.310 | LP325.310 | LP325.309 | LP325.309 | LP325.310 |
| 74569.02  | 105722    | 71355.71  | 97282.04  | 99089.65  | 328164.8  | 145821.8  | 50245.35  | 73939.76  | 67031.07  |
| 69743.5   | 98163.3   | 72176.86  | 91936.24  | 96573.96  | 334232.9  | 171346    | 41590.02  | 61306.91  | 60575.63  |
| 68813.8   | 99586.25  | 62904.35  | 98491.66  | 94170.2   | 373568.4  | 103790.3  | 46903.76  | 60947.63  | 62138.48  |
| 66622.97  | 97129.3   | 61953.94  | 91774.47  | 88635.69  | 336799.4  | 143192.4  | 39610.28  | 65760.44  | 56460.52  |
| 76373.04  | 107950.4  | 70049.14  | 91144.59  | 92975.45  | 337080.6  | 98714.75  | 52910.72  | 75016.07  | 60317.7   |

|           |           |           |           |           |           |           |           |           |           |
|-----------|-----------|-----------|-----------|-----------|-----------|-----------|-----------|-----------|-----------|
| LP325.310 | LP325.310 | LP325.310 | LP325.310 | LP325.310 | LP326.196 | LP326.196 | LP326.223 | LP326.238 | LP326.305 |
| 69115.13  | 131686.2  | 99727.29  | 85812.55  | 63760.91  | 12043.98  | 22810.93  | 18928.51  | 13595.44  | 51482.58  |
| 66980.96  | 112985.8  | 92369.75  | 79963.41  | 54166.15  | 13828.35  | 23479.57  | 20045.21  | 14644.4   | 55108.51  |
| 71279.77  | 110116.7  | 96065.77  | 83139.25  | 48541.5   | 10211.13  | 22391.63  | 17594.41  | 13328.37  | 70240.41  |
| 60800.91  | 109203.1  | 85589.69  | 80159.29  | 49957.98  | 10246.46  | 24348.1   | 17549.46  | 17289.89  | 77413.93  |
| 66328.75  | 105309.3  | 97929.9   | 86752.05  | 51233.09  | 8858.577  | 22018.05  | 17768.65  | 16698.36  | 81738.39  |

|           |           |           |           |           |           |           |           |           |           |
|-----------|-----------|-----------|-----------|-----------|-----------|-----------|-----------|-----------|-----------|
| LP326.305 | LP326.313 | LP326.342 | LP326.342 | LP326.378 | LP326.378 | LP327.077 | LP327.078 | LP327.078 | LP327.077 |
| 28138.77  | 68586.03  | 146016.5  | 87879.04  | 20866.92  | 73482.09  | 93028.66  | 93588.31  | 102505.4  | 128285    |
| 27956.07  | 67762.17  | 159615    | 98895.97  | 31475.33  | 84503.97  | 86562.55  | 88585.88  | 99145.35  | 131916.9  |
| 28682.8   | 72177.74  | 235603.2  | 145882.5  | 27665.79  | 134905.3  | 89556.19  | 93325.3   | 102044.8  | 128747.1  |
| 28825.8   | 59995.46  | 285970.9  | 171053.1  | 25907.99  | 168166.1  | 92745.51  | 97342.27  | 100159.2  | 149130.8  |
| 29224.26  | 71696.48  | 314435.8  | 189441.7  | 19482.7   | 185131.7  | 35016.04  | 50468.46  | 45385.06  | 50230.42  |

|           |           |           |           |           |           |           |           |           |           |
|-----------|-----------|-----------|-----------|-----------|-----------|-----------|-----------|-----------|-----------|
| LP327.078 | LP327.141 |
| 100984.9  | 142244.8  | 128435    | 110572.9  | 122717.9  | 110075    | 120806    | 150215.5  | 138964.1  | 131782.2  |
| 108015.2  | 139878.5  | 126870.7  | 108329.7  | 109460.2  | 115447.9  | 122145.4  | 146498.6  | 127336.4  | 117104.1  |
| 110568.6  | 135960.4  | 140986.8  | 119356.6  | 128477.3  | 110052.9  | 129861.4  | 154323.3  | 150679.6  | 120355.7  |
| 105256.4  | 155235.9  | 128677.7  | 105402.7  | 122887.4  | 112359.4  | 132964.6  | 151450.4  | 148891.5  | 134038.9  |
| 43677.87  | 56441.71  | 65131.03  | 45124.88  | 59358.53  | 52454.51  | 50601.15  | 71891     | 59333.28  | 122193.6  |



|           |           |           |           |           |           |           |           |           |           |
|-----------|-----------|-----------|-----------|-----------|-----------|-----------|-----------|-----------|-----------|
| LP327.141 |
| 163372.7  | 123564.5  | 130954.1  | 162221.5  | 117378.4  | 116253.6  | 162538.2  | 148553.7  | 181547.6  | 105613.1  |
| 112712.4  | 101087.5  | 133220.8  | 184570.9  | 128611.3  | 116679.2  | 219113.6  | 133105.9  | 142148.7  | 69248.24  |
| 93028.23  | 126768.5  | 110593    | 208373.9  | 145827.4  | 87660.49  | 130933.8  | 202853.4  | 165712.3  | 76012     |
| 163385.8  | 93220.38  | 133709.1  | 238835.5  | 111533    | 113366.3  | 154714.3  | 157029.5  | 120715.7  | 59133.7   |
| 125074.2  | 121371.6  | 126409.7  | 152086.5  | 141244.6  | 152977.3  | 107581    | 132800.8  | 150079.8  | 77549.17  |

|           |           |           |           |           |           |           |           |           |           |
|-----------|-----------|-----------|-----------|-----------|-----------|-----------|-----------|-----------|-----------|
| LP327.141 |
| 136442    | 145947.1  | 200945.9  | 129220.4  | 101626.8  | 164352.7  | 132166.8  | 134320.3  | 183854.2  | 148432.2  |
| 119530.4  | 181526.9  | 127676.9  | 126992.2  | 119843.7  | 116191    | 128813.2  | 140324.8  | 158034.1  | 138885.2  |
| 114695.7  | 183107.2  | 167936.2  | 163746.7  | 122614.7  | 106547.8  | 155054.2  | 177472.6  | 111222.7  | 134872.2  |
| 163824.3  | 154661.6  | 142600.9  | 97906.55  | 146582.4  | 143659.9  | 110486    | 145447.1  | 167478.5  | 189109.5  |
| 131965.1  | 130968    | 223007.5  | 110391.3  | 150014.1  | 128663.4  | 158388.9  | 162067.7  | 99249.8   | 146994.8  |

|           |           |           |           |           |           |           |           |           |           |
|-----------|-----------|-----------|-----------|-----------|-----------|-----------|-----------|-----------|-----------|
| LP327.141 |
| 113000.7  | 121594    | 98438.06  | 159700.2  | 153581.4  | 147935.9  | 144240    | 110635.9  | 151317.8  | 111545.4  |
| 160386.5  | 202235.3  | 129807.6  | 122825.5  | 153503.9  | 128249.4  | 156893.4  | 109539.2  | 132014.2  | 156977    |
| 149940    | 141062.9  | 106856.3  | 212578.2  | 160046.6  | 121575.2  | 156379.9  | 104850    | 122929.6  | 107832.1  |
| 145504.2  | 238474.2  | 111803.4  | 137667.6  | 156632.9  | 130914.2  | 158001    | 78759.43  | 159348.4  | 127340.2  |
| 102240.1  | 198810.9  | 118360.5  | 153078.9  | 193369.7  | 151210.5  | 164136.4  | 120799.8  | 145098.7  | 138448.1  |

|           |           |           |           |           |           |           |           |           |           |
|-----------|-----------|-----------|-----------|-----------|-----------|-----------|-----------|-----------|-----------|
| LP327.141 |
| 141680.5  | 185984.9  | 183771.5  | 134280.2  | 125444.2  | 145905.9  | 162969    | 167489.3  | 109187.7  | 131557.1  |
| 128622.9  | 147955.2  | 136242.7  | 137939.3  | 130233.6  | 171754.6  | 168517    | 135309.9  | 100103    | 159031.8  |
| 113295    | 149879.2  | 129283.8  | 177763.2  | 124188    | 161117    | 140000.3  | 141759.4  | 155785.5  | 131999.4  |
| 115255    | 209817.4  | 145135    | 191345.3  | 98996.24  | 129390.4  | 172670.9  | 128531.5  | 118653.3  | 181806.3  |
| 122234.9  | 143284.8  | 174619.2  | 129091.2  | 129997.6  | 129318.6  | 122630.6  | 167441.6  | 96460.02  | 139529.5  |

|           |           |           |           |           |           |           |           |           |           |
|-----------|-----------|-----------|-----------|-----------|-----------|-----------|-----------|-----------|-----------|
| LP327.141 |
| 120238.8  | 126825.8  | 133787.6  | 106448    | 176859.2  | 116861.2  | 163571.2  | 112543.3  | 191240.5  | 129913.5  |
| 122520.8  | 188765.2  | 166514.3  | 135565.5  | 152645.7  | 111288.1  | 163229.7  | 101544.3  | 203409.7  | 112197.7  |
| 149573.1  | 115274.2  | 144788.5  | 161347.7  | 110333.4  | 114195.9  | 185808    | 109142.5  | 146489.9  | 138269.5  |
| 132957    | 165824.2  | 144740.3  | 132200.6  | 100455.5  | 126407.7  | 136137.7  | 119328.1  | 190776.1  | 144604    |
| 156805    | 140710.5  | 201174.2  | 131640.4  | 142640.4  | 117934.1  | 237648.5  | 114504.7  | 214599.1  | 179588.7  |

|           |           |           |           |           |           |           |           |           |           |
|-----------|-----------|-----------|-----------|-----------|-----------|-----------|-----------|-----------|-----------|
| LP327.141 |
| 199505.9  | 180789.2  | 144826.9  | 119705.9  | 155760.2  | 128257.5  | 179420.3  | 144753.7  | 108900.8  | 116546    |
| 156021.8  | 191359.8  | 169846.7  | 103805    | 127360.1  | 116197.2  | 252357.7  | 138981.1  | 115711.7  | 156547.4  |
| 188423.7  | 134560.1  | 143831.9  | 105685    | 119524    | 132451.6  | 141218.9  | 119145.6  | 123192.4  | 101808.1  |
| 163383    | 130546.7  | 184594.7  | 103562.7  | 130551.5  | 116948.8  | 149245.3  | 164597.5  | 111071.1  | 115071.5  |
| 220846.4  | 132321.2  | 133607.1  | 127828.1  | 122787.9  | 155350.3  | 160725.5  | 167889    | 147243.8  | 119232.6  |

|           |           |           |           |           |           |           |           |           |           |           |
|-----------|-----------|-----------|-----------|-----------|-----------|-----------|-----------|-----------|-----------|-----------|
| LP327.141 |
| 85601.64  | 122906.5  | 101049.1  | 152326.2  | 114119.8  | 162395.6  | 140989.3  | 63466.47  | 110788.9  | 90508.26  |           |
| 70730.55  | 107226.7  | 143536.4  | 79344.21  | 157471.2  | 123906.3  | 144180.4  | 66645.76  | 72523.41  | 78165.55  |           |
| 59679.32  | 128997.9  | 167265.1  | 98595.11  | 156972.7  | 176012.3  | 188402.9  | 81128.6   | 66017.25  | 59356.96  |           |
| 91850.4   | 105221.8  | 89464.37  | 95628.51  | 128230.8  | 122017.8  | 152430.7  | 65140.51  | 65442.25  | 71526.7   |           |
| 62562.6   | 112408.4  | 137831.9  | 96067.9   | 173635.6  | 104385.1  | 160137.8  | 69828.38  | 66253.82  | 78314.01  |           |

|           |           |           |           |           |           |           |           |           |           |
|-----------|-----------|-----------|-----------|-----------|-----------|-----------|-----------|-----------|-----------|
| LP327.141 | LP327.18_ |
| 82100.01  | 79557.25  | 99501.74  | 56243.94  | 45508.14  | 58005.81  | 54144.75  | 79454.82  | 67821.42  | 224727.3  |
| 68862.27  | 77322.77  | 90280.58  | 59499.89  | 53225.19  | 58377.44  | 84765.67  | 76073.56  | 63146.54  | 246317.6  |
| 70810.32  | 71577.81  | 100470.3  | 53401.07  | 62539.47  | 73707.67  | 57513.66  | 93925.25  | 59597.93  | 261867.5  |
| 57690.63  | 98051.44  | 89193.43  | 73877.94  | 43321.37  | 59887.16  | 49441.15  | 66637.08  | 57825.79  | 114826.9  |
| 72366.03  | 80886.04  | 97129.08  | 64411.64  | 44946.97  | 52142.5   | 56760.51  | 57215.33  | 56438.54  | 254594.1  |



|           |           |           |           |           |           |           |           |           |           |
|-----------|-----------|-----------|-----------|-----------|-----------|-----------|-----------|-----------|-----------|
| LP327.178 | LP327.178 | LP327.179 | LP327.179 | LP327.178 | LP327.179 | LP327.179 | LP327.179 | LP327.178 | LP327.179 |
| 207089.1  | 126151.1  | 86263.72  | 130435.8  | 246506.9  | 202901.1  | 121956.1  | 237023.4  | 113115.6  | 152506.1  |
| 200606.9  | 134028.1  | 80528.97  | 131223.5  | 177632.6  | 202098.9  | 249662.9  | 232729.4  | 109608.2  | 170673.8  |
| 205357.9  | 126901.5  | 82188.9   | 125063.6  | 253073.8  | 202843.5  | 251210.2  | 233292.5  | 113325.4  | 149029.6  |
| 193697.9  | 130926.2  | 83933.44  | 110832    | 244245.7  | 185768.7  | 227218.8  | 210590.6  | 107175.2  | 131533.1  |
| 176304.3  | 132441.7  | 84201.65  | 109882.9  | 245263.1  | 181603.3  | 230289.3  | 202829.8  | 121565    | 142581.6  |

|           |           |           |           |           |           |           |           |           |           |
|-----------|-----------|-----------|-----------|-----------|-----------|-----------|-----------|-----------|-----------|
| LP327.179 | LP327.179 | LP327.178 | LP327.179 | LP327.178 | LP327.179 | LP327.179 | LP327.179 | LP327.179 | LP327.195 |
| 132937.6  | 126581.4  | 167766.6  | 197094.3  | 162585.3  | 95178.94  | 172984.4  | 113186.9  | 185542.6  | 545937.1  |
| 136090.9  | 135847.3  | 182592.1  | 196036.7  | 161262.9  | 103246.8  | 171043.7  | 109002.6  | 196440.8  | 711781    |
| 132810.8  | 139772.6  | 199904.7  | 187726.7  | 164912.8  | 97108.17  | 184468.1  | 105453.7  | 195370.8  | 686622.4  |
| 143386.4  | 130153.1  | 176367.7  | 188433    | 147254.3  | 103258.5  | 180927.7  | 107886.6  | 188123.8  | 714051.7  |
| 136974.1  | 133256.1  | 179343.7  | 183993.5  | 145521.2  | 68646.75  | 161336.6  | 109827.2  | 198160.5  | 1028787   |

|           |           |           |           |           |           |           |           |           |           |
|-----------|-----------|-----------|-----------|-----------|-----------|-----------|-----------|-----------|-----------|
| LP327.195 |
| 646701.3  | 410909.2  | 487224.8  | 231755.7  | 427279.6  | 257765.3  | 359347.5  | 311064.3  | 318461.2  | 121286.9  |
| 637398    | 366764.5  | 482207.7  | 217195.2  | 314917.9  | 322433.6  | 379132.5  | 290630.3  | 289243.7  | 100770.7  |
| 542972.6  | 454790    | 475482.6  | 244287.4  | 441171.7  | 291300.4  | 364467.8  | 402492.1  | 308102.2  | 104742.1  |
| 690537.1  | 530754.2  | 389726.7  | 226633    | 280457.8  | 230252.4  | 366900.1  | 274332.5  | 325339.8  | 102329.7  |
| 713506.8  | 498260.6  | 456867.2  | 235292.4  | 371173.1  | 259279.4  | 361141.4  | 283043.4  | 228402    | 123274.5  |

|           |           |           |           |           |           |           |           |           |           |
|-----------|-----------|-----------|-----------|-----------|-----------|-----------|-----------|-----------|-----------|
| LP327.194 | LP327.195 | LP327.195 | LP327.195 | LP327.194 | LP327.195 | LP327.195 | LP327.195 | LP327.195 | LP327.195 |
| 169198.3  | 116525    | 154045.6  | 167837.8  | 170827.7  | 210377.2  | 180956.4  | 137385.5  | 142548.4  | 151167.5  |
| 156402.5  | 174301.5  | 149759    | 139544.6  | 123241.1  | 248461.1  | 175361.9  | 149819.6  | 139888    | 133548.4  |
| 150145.2  | 108751.2  | 142579    | 162878.3  | 132362    | 215096.1  | 208784    | 236108.2  | 149952.7  | 122685.9  |
| 128253.1  | 119233.8  | 136208.3  | 163787    | 145198.7  | 171172.2  | 203842.4  | 161762.1  | 164101.9  | 124419.9  |
| 131049.1  | 111062.8  | 126473.9  | 181710.5  | 99992.61  | 174049.2  | 162478.5  | 160425.8  | 220348    | 112531.6  |

|           |           |           |           |           |           |           |           |           |           |
|-----------|-----------|-----------|-----------|-----------|-----------|-----------|-----------|-----------|-----------|
| LP327.194 | LP327.195 |
| 89581.57  | 135627.1  | 326731.4  | 165145.9  | 169213.3  | 125808.8  | 111432.1  | 131587.3  | 168862.9  | 157853.9  |
| 200961    | 124631.1  | 358718.6  | 167479.9  | 183547.9  | 124926.6  | 123167.7  | 152420.7  | 153212.5  | 167616.7  |
| 90558.21  | 138058.2  | 325482.3  | 152665.3  | 207243.6  | 117218.4  | 119903.4  | 149424.2  | 175374.7  | 156954.6  |
| 94014.43  | 124875.7  | 322630.5  | 151285.3  | 166696    | 119875.1  | 123203.7  | 133467.6  | 168784.4  | 163778.8  |
| 89428.95  | 132734.1  | 323319.3  | 134740.6  | 159164    | 137584.6  | 98158.88  | 132871.2  | 146976.5  | 157292.6  |

|           |           |           |           |           |           |           |           |           |           |
|-----------|-----------|-----------|-----------|-----------|-----------|-----------|-----------|-----------|-----------|
| LP327.195 |
| 162723    | 154010.9  | 148294.9  | 142833.4  | 154238.5  | 118197.5  | 105795.5  | 132431.9  | 117517.7  | 105287.6  |
| 170165.8  | 143300.8  | 146637.6  | 141853.8  | 158755.5  | 119747.2  | 106554.1  | 140232.2  | 105693.1  | 122892.7  |
| 165392.6  | 157214    | 126835.2  | 138323    | 156592    | 122057.8  | 127049    | 143414.9  | 117867.5  | 115235.8  |
| 182590.4  | 166725.2  | 148886.4  | 150379.6  | 137208.6  | 128641.3  | 115864.5  | 142810    | 110635.9  | 106498    |
| 160665.6  | 136727.4  | 120635.4  | 127946    | 148600.8  | 110406    | 109661.5  | 130025.1  | 113275    | 112154.9  |

|           |           |           |           |           |           |           |           |           |           |
|-----------|-----------|-----------|-----------|-----------|-----------|-----------|-----------|-----------|-----------|
| LP327.195 | LP327.216 | LP327.216 | LP327.216 |
| 132486.8  | 113830.9  | 114244.4  | 130445    | 162509.3  | 162681.2  | 115034.4  | 300975    | 259124.3  | 150058.7  |
| 135358.5  | 112388.9  | 134324.2  | 137609.8  | 167768.9  | 153438.6  | 111671.5  | 291311    | 277501.4  | 141146.9  |
| 145262    | 113551.3  | 130900.9  | 135729.7  | 166836.9  | 161081.8  | 115121.3  | 302004.2  | 297588.6  | 160277.9  |
| 126979.4  | 112563.4  | 124963    | 127072.9  | 155190.4  | 174689.9  | 108809    | 295511.9  | 273620.2  | 156797.7  |
| 125846.9  | 117209    | 108987.1  | 135430.2  | 154320.9  | 129627.4  | 98005.8   | 312262.3  | 285680.6  | 151126.4  |

|           |           |           |           |           |           |           |           |           |           |
|-----------|-----------|-----------|-----------|-----------|-----------|-----------|-----------|-----------|-----------|
| LP327.253 | LP327.289 |
| 100540.6  | 58057.49  | 52287.04  | 48098.19  | 38194.29  | 31469.2   | 35609.55  | 50271.16  | 45316.48  | 44499.04  |
| 54464.68  | 50605.07  | 54788.16  | 54505.68  | 33992.35  | 31813.68  | 41321.27  | 46271.4   | 50466.59  | 53579.5   |
| 95017.12  | 62633.47  | 52738.22  | 42879.22  | 36378.7   | 35313.48  | 40599.72  | 49772.37  | 48460.31  | 49812.74  |
| 75940.61  | 53738.28  | 45972.96  | 50026.87  | 36546.91  | 29726.13  | 38970.14  | 41951.47  | 53136.31  | 44310.42  |
| 68612.24  | 54498.83  | 46933.95  | 43429.89  | 33612.53  | 34469.01  | 41820.36  | 51925.65  | 49700.35  | 43092.94  |



|           |           |           |           |           |           |           |           |           |           |
|-----------|-----------|-----------|-----------|-----------|-----------|-----------|-----------|-----------|-----------|
| LP327.289 | LP327.289 | LP327.289 | LP327.289 | LP327.308 | LP327.336 | LP328.011 | LP328.011 | LP328.011 | LP328.011 |
| 53193.85  | 35988.17  | 62177.12  | 52739.18  | 33872.92  | 26592.6   | 65732.28  | 83514.44  | 95626.27  | 64226.93  |
| 51706.63  | 35327.26  | 60082.74  | 50197.76  | 35163.73  | 27139.36  | 54991.23  | 70755.77  | 64648.75  | 52834.21  |
| 50552.08  | 33362.72  | 64407.56  | 45346.07  | 33343.28  | 26976.95  | 60493.16  | 61867.19  | 63193.43  | 60632.1   |
| 48457.42  | 35558.21  | 58155.65  | 47669.04  | 34554.98  | 26182.79  | 62809.32  | 70660.3   | 91962.48  | 63424.71  |
| 58367.45  | 32443.3   | 60704.87  | 46162.42  | 32692.13  | 26776.48  | 56591.89  | 69283.07  | 63578.67  | 62240.94  |

|           |           |           |           |           |           |           |           |           |           |           |
|-----------|-----------|-----------|-----------|-----------|-----------|-----------|-----------|-----------|-----------|-----------|
| LP328.011 |
| 55160.84  | 79202.88  | 93589.28  | 70251.47  | 58024.22  | 119566.8  | 63530.08  | 55827.78  | 85579     | 79164.68  |           |
| 56303.03  | 76966.16  | 98647.8   | 51982.39  | 63882.05  | 80411.51  | 59682.1   | 56368.45  | 68448.59  | 79354.28  |           |
| 54041.54  | 68567.11  | 94872.75  | 49524.94  | 59013.56  | 80600.91  | 74806.69  | 49761.28  | 63528.54  | 84009.26  |           |
| 72258.03  | 67909.86  | 99116.88  | 55825.58  | 63590.57  | 87166.48  | 69914.77  | 53137.54  | 70636.31  | 81923.91  |           |
| 63381.93  | 70299.67  | 101989.7  | 54626.03  | 55499.97  | 85776.58  | 73683.32  | 52904.23  | 74403.36  | 83040.79  |           |

|           |           |           |           |           |           |           |           |           |           |
|-----------|-----------|-----------|-----------|-----------|-----------|-----------|-----------|-----------|-----------|
| LP328.011 | LP328.011 | LP328.011 | LP328.011 | LP328.011 | LP328.012 | LP328.011 | LP328.011 | LP328.011 | LP328.011 |
| 80342.79  | 58318.66  | 94894.53  | 68228.57  | 52216.68  | 61235.42  | 55340.66  | 107683.6  | 66508.99  | 70991.13  |
| 85481.16  | 67258.55  | 71207.85  | 82089.3   | 68379.29  | 66298.11  | 51566.01  | 112484    | 69511.27  | 67533.02  |
| 82090.65  | 58358.96  | 76773.05  | 72034.37  | 74078.2   | 63430.72  | 54393.68  | 112875.8  | 58099.25  | 74002.98  |
| 77266.72  | 68721.72  | 80275.78  | 98262.48  | 72165.89  | 63503.63  | 56534.26  | 125450.6  | 67886.51  | 80348.38  |
| 87983.39  | 56722.33  | 75750.54  | 68977.61  | 72922.82  | 64822.61  | 52892.15  | 126311.4  | 67191.07  | 80404.3   |

|           |           |           |           |           |           |           |           |           |           |
|-----------|-----------|-----------|-----------|-----------|-----------|-----------|-----------|-----------|-----------|
| LP328.011 | LP328.012 | LP328.011 |
| 85223.09  | 95381.17  | 65296.58  | 72889.2   | 74664.42  | 66307.75  | 65423.23  | 84870.86  | 54444.91  | 52892.02  |
| 82155.64  | 96767.5   | 68891.17  | 74888.93  | 72639.32  | 66688.34  | 63357.33  | 93116.23  | 54072.6   | 46182.81  |
| 83803.23  | 98465.1   | 69875.83  | 70967.06  | 76812.5   | 64683.57  | 64764.53  | 92174.54  | 57051.8   | 47386.76  |
| 84402.63  | 101007.1  | 67632.09  | 66567.25  | 70043.18  | 71445.43  | 70143.26  | 92395.16  | 62591.28  | 46426.11  |
| 90887.22  | 98263.69  | 68649.38  | 77434.12  | 74374.06  | 68310.24  | 78096.96  | 87318.02  | 55721.66  | 53569.66  |

|           |           |           |           |           |           |           |           |           |           |
|-----------|-----------|-----------|-----------|-----------|-----------|-----------|-----------|-----------|-----------|
| LP328.011 | LP328.012 | LP328.011 |
| 62049.34  | 67538.62  | 55155.87  | 46089.47  | 35384.92  | 53363.43  | 73212.44  | 83087.24  | 68655.87  | 86800.72  |
| 60727.15  | 58806.82  | 51987.07  | 50998.53  | 38172.49  | 52116.44  | 75227.23  | 78929.02  | 65991.88  | 89950.35  |
| 59286.77  | 64368.71  | 48133     | 46529.63  | 35847.54  | 51095.89  | 71191.93  | 88950.46  | 65518.59  | 73706.78  |
| 65174.52  | 59399.95  | 53299.61  | 52247.97  | 36934.14  | 50501.89  | 79363.35  | 82274.66  | 73415.08  | 93502.8   |
| 61205.22  | 63433.7   | 54886.72  | 47967.85  | 33676.76  | 59720.95  | 74940.99  | 91292.29  | 68976.74  | 87812.92  |

|           |           |           |           |           |           |           |           |           |           |
|-----------|-----------|-----------|-----------|-----------|-----------|-----------|-----------|-----------|-----------|
| LP328.011 | LP328.011 | LP328.011 | LP328.011 | LP328.011 | LP328.199 | LP328.199 | LP328.198 | LP328.211 | LP328.212 |
| 84210.02  | 49616.25  | 42970.85  | 49928.56  | 57724.17  | 84803.2   | 82880.26  | 131324.9  | 76205.17  | 35662.97  |
| 92609.15  | 44530.71  | 34565.84  | 44106.24  | 52951.62  | 85963.74  | 83091.94  | 145678    | 77101.72  | 37520     |
| 84051.9   | 46325.37  | 35225.79  | 45275.93  | 56244.49  | 89486.31  | 91084.48  | 142666.8  | 77252.34  | 37596.32  |
| 86321     | 45916.87  | 38003.66  | 41582.28  | 56618.84  | 82559.7   | 80372.33  | 135588.9  | 80606.26  | 34371.84  |
| 93716.59  | 43386.7   | 35148.61  | 44433.33  | 58263.84  | 83132.53  | 76169.16  | 134538.8  | 66293.33  | 33502.32  |

|           |           |           |           |           |           |           |           |           |           |
|-----------|-----------|-----------|-----------|-----------|-----------|-----------|-----------|-----------|-----------|
| LP328.256 | LP328.256 | LP328.284 | LP328.285 | LP328.321 | LP328.321 | LP328.348 | LP328.348 | LP328.915 | LP328.915 |
| 21396.23  | 17024.12  | 45058.63  | 16816.74  | 89795.19  | 68493.94  | 21791.03  | 18345.29  | 66715.27  | 41015.01  |
| 23504.97  | 18290.11  | 51717.53  | 14779.73  | 98983.36  | 68817.48  | 23195.37  | 17117.45  | 64601.79  | 38331.77  |
| 25802.92  | 17846.43  | 52261.08  | 19944.95  | 97175.19  | 76322.79  | 22981.97  | 18307.68  | 96554.48  | 58754.69  |
| 23640.33  | 20360.11  | 50389.81  | 18971.09  | 103121.4  | 83919.86  | 23692.27  | 18425.94  | 131395.5  | 60084.14  |
| 27357.79  | 16784.3   | 54786.4   | 19686.6   | 103249.1  | 79898.85  | 24078.24  | 18951.68  | 50501.69  | 26385.73  |

|           |           |           |           |           |           |           |           |           |           |
|-----------|-----------|-----------|-----------|-----------|-----------|-----------|-----------|-----------|-----------|
| LP329.157 |
| 316546.6  | 477217.6  | 310166.9  | 419460    | 434670.2  | 394110.2  | 514784.5  | 340105.2  | 405219.1  | 470649.3  |
| 332268    | 370816.3  | 305414.7  | 378399.4  | 356505.8  | 386627    | 397153.7  | 270820.4  | 558518    | 331400.6  |
| 380084.1  | 492403.5  | 296972.4  | 294604.5  | 386112.6  | 444363.2  | 340775.6  | 278890.2  | 350410.8  | 491993.7  |
| 336278.6  | 323766.3  | 374186.9  | 482178.9  | 334211    | 313236.5  | 452344.7  | 509752.2  | 416847.7  | 343555.1  |
| 217298.8  | 354418.9  | 288492.1  | 354509.2  | 379643.8  | 423422.1  | 404457.2  | 288704.4  | 521904.4  | 296166    |



|           |           |           |           |           |           |           |           |           |           |
|-----------|-----------|-----------|-----------|-----------|-----------|-----------|-----------|-----------|-----------|
| LP329.157 |
| 269916.3  | 376099.5  | 590690.5  | 487574.4  | 347451.5  | 260704.7  | 392391.9  | 391941.5  | 549851.3  | 253191.9  |
| 386988.2  | 466406.4  | 455190.7  | 591794.7  | 377752.1  | 255016.2  | 587278.7  | 358796.4  | 332975.4  | 321218.1  |
| 464725.6  | 376768.7  | 374506.8  | 395921.8  | 357793.8  | 503712.7  | 538676.1  | 416400.5  | 461665    | 339380    |
| 308095.8  | 351754.2  | 471110.4  | 394327    | 343289.5  | 288027.8  | 349036.7  | 505469.4  | 452649.9  | 371704.8  |
| 262746.6  | 339319.1  | 346669.7  | 341657.5  | 494842.1  | 278011.7  | 362475.4  | 372571.5  | 374011.2  | 453671.7  |

|           |           |           |           |           |           |           |           |           |           |
|-----------|-----------|-----------|-----------|-----------|-----------|-----------|-----------|-----------|-----------|
| LP329.157 |
| 357859.7  | 512800.1  | 437366.4  | 281309.3  | 351520.6  | 245534.1  | 288751.1  | 250425.7  | 288320    | 226880.5  |
| 347434.7  | 621563.7  | 377062    | 352791.7  | 288271.2  | 294433.6  | 244810.7  | 210880.9  | 352769.1  | 453526.2  |
| 551986.2  | 383758.9  | 481315.1  | 425761.7  | 290185.9  | 334011.1  | 277302.5  | 223449.7  | 262341.6  | 291531.7  |
| 298403.9  | 642276.7  | 482611.7  | 370933.3  | 472212.9  | 256223.5  | 368791.1  | 183776.6  | 344831.3  | 483274.6  |
| 385262    | 404117.1  | 482809.3  | 324487.8  | 372229.9  | 303309.1  | 375196.2  | 190895.9  | 388563.2  | 348442.5  |

|           |           |           |           |           |           |           |           |           |           |
|-----------|-----------|-----------|-----------|-----------|-----------|-----------|-----------|-----------|-----------|
| LP329.157 |
| 374263    | 225502.2  | 466964.8  | 274932.3  | 312862.4  | 241394.8  | 294579.7  | 325182.4  | 450217.4  | 319698.6  |
| 311585.1  | 158293.3  | 627792.2  | 404470.7  | 319743.1  | 275521.3  | 344934    | 289958.6  | 261433.7  | 413989.3  |
| 321410.3  | 136644.2  | 533203.6  | 365252    | 299500.9  | 307424.2  | 246259    | 358665.2  | 297139.8  | 388981.6  |
| 289754.6  | 206869.4  | 549982.7  | 456520.5  | 262229.6  | 269280.8  | 305133.8  | 343454.3  | 341638.3  | 506864.2  |
| 402185.1  | 175313.5  | 388423.6  | 259371.1  | 362986    | 311937.5  | 338967.7  | 307683.5  | 388560.8  | 424013.7  |

|           |           |           |           |           |           |           |           |           |           |
|-----------|-----------|-----------|-----------|-----------|-----------|-----------|-----------|-----------|-----------|
| LP329.157 |
| 282959.4  | 298292.9  | 274554.1  | 277037.2  | 166008.2  | 140041.9  | 198677.7  | 142280    | 151584.5  | 187988.8  |
| 272632.4  | 348439.8  | 277528.2  | 330503.5  | 150098.7  | 168494    | 189209.7  | 192397.9  | 184615.1  | 175257.2  |
| 233010.2  | 369426.5  | 267413.8  | 276885.7  | 146540    | 179126.3  | 202873.1  | 163352.4  | 157137.1  | 154473.4  |
| 278347.8  | 302891.2  | 256457.3  | 309390.9  | 124178.1  | 179354.7  | 191884.4  | 129430.3  | 221092.3  | 174723.6  |
| 367960.7  | 382319.5  | 297425.6  | 286280.4  | 142053    | 123178    | 223344    | 140540.3  | 139906.9  | 187220    |

|           |           |           |           |           |           |           |           |           |           |
|-----------|-----------|-----------|-----------|-----------|-----------|-----------|-----------|-----------|-----------|
| LP329.157 |
| 99072.35  | 136030.9  | 260533.5  | 600304    | 548953.4  | 383669.6  | 354179.6  | 517959.5  | 402364.1  | 436231    |
| 166220.4  | 117725.6  | 355615.8  | 274085.2  | 370724    | 409148.8  | 486141    | 331396.3  | 442427.1  | 379997.6  |
| 108886.8  | 110096.7  | 385700.9  | 370272.7  | 305198.7  | 322326.8  | 348176.9  | 440428.4  | 420733.1  | 494767.8  |
| 123973.6  | 112349.6  | 315314.8  | 295449.2  | 503544.3  | 363539.8  | 530384.3  | 342616.8  | 427228.6  | 356858.3  |
| 101558.7  | 113058.6  | 256428.9  | 437395.7  | 511642.5  | 313656.4  | 450467    | 460050.1  | 345710.4  | 535543.1  |

|           |           |           |           |           |           |           |           |           |           |
|-----------|-----------|-----------|-----------|-----------|-----------|-----------|-----------|-----------|-----------|
| LP329.157 |
| 361373.4  | 543717.1  | 337835.9  | 313258.1  | 390739.8  | 340398.8  | 331028.5  | 504020.1  | 327119    | 428994.7  |
| 489584.9  | 429374.3  | 338689    | 393332.5  | 767981.7  | 388261    | 443286.9  | 348022.4  | 299730.6  | 555897.7  |
| 357644.2  | 322891.4  | 422084.1  | 469861.4  | 358154    | 382716.8  | 469412.5  | 296315.9  | 263569.9  | 554144.1  |
| 409170.4  | 556381.9  | 285198.3  | 384539.2  | 640237.2  | 399222.3  | 668859.6  | 306429.9  | 279066    | 346001.1  |
| 420132.5  | 450697.3  | 399773.9  | 480294.9  | 401777.5  | 337319.2  | 440507.3  | 487871.1  | 296590.4  | 409476.1  |

|           |           |           |           |           |           |           |           |           |           |
|-----------|-----------|-----------|-----------|-----------|-----------|-----------|-----------|-----------|-----------|
| LP329.157 |
| 283610.1  | 376874.2  | 289252.7  | 266435.2  | 265801.6  | 333403    | 167284.2  | 175092    | 401306.8  | 391309.5  |
| 240915.6  | 278331.9  | 322278.4  | 260735    | 263333.4  | 290267.6  | 157886.2  | 162985.1  | 405157.4  | 352166.8  |
| 256274.5  | 508133    | 347325    | 265434.7  | 313517    | 282051.2  | 158902.6  | 145483.9  | 364948.1  | 352829.8  |
| 334040.5  | 411187.9  | 352640.9  | 349048.1  | 278255.8  | 299138.3  | 163110.7  | 162514.4  | 395963    | 394066.9  |
| 366444.9  | 290391.9  | 399337.6  | 314533.9  | 265284.1  | 282766.3  | 149815.9  | 126673.6  | 410258.4  | 396902.2  |

|            |            |            |            |           |            |            |            |            |           |
|------------|------------|------------|------------|-----------|------------|------------|------------|------------|-----------|
| LP329.157! | LP329.157! | LP329.157! | LP329.157! | LP329.158 | LP329.157! | LP329.195! | LP329.195! | LP329.195! | LP329.211 |
| 311661.4   | 399949.9   | 250096.3   | 283838.9   | 272959.3  | 324932.2   | 274661.1   | 551454.9   | 240441.5   | 13093.27  |
| 313358.1   | 374151.9   | 236441.6   | 294186.1   | 283973.8  | 330296.2   | 277723.5   | 538548.9   | 252735.9   | 125995.1  |
| 307940.9   | 369423.5   | 235492.2   | 326851.4   | 288194.4  | 339121     | 302091.8   | 526817.9   | 242513.6   | 115541.5  |
| 316167.8   | 361567.8   | 244557.6   | 306338.5   | 261476.3  | 331225.7   | 294819.3   | 567353.4   | 265379.8   | 109932.1  |
| 346186.5   | 374970.9   | 267834     | 291702     | 282753.3  | 324712.7   | 297623.6   | 590069.1   | 253503.9   | 103853.6  |



|           |           |           |           |           |           |           |           |           |           |
|-----------|-----------|-----------|-----------|-----------|-----------|-----------|-----------|-----------|-----------|
| LP329.242 | LP329.242 | LP329.324 | LP330.009 | LP330.008 | LP330.008 | LP330.008 | LP330.008 | LP330.008 | LP330.008 |
| 401689    | 228110.7  | 11991.96  | 83239.56  | 52397.62  | 59049.86  | 66228.51  | 61832.81  | 60125.34  | 58591.13  |
| 34456.67  | 270227.3  | 8854.267  | 85265.12  | 55073.33  | 63660.77  | 67339.1   | 49749.66  | 52413.87  | 73227.58  |
| 406153.4  | 247621.3  | 14026.98  | 80439.7   | 60973.21  | 63775.94  | 68756.56  | 52399.5   | 60267.17  | 54812.22  |
| 388428.8  | 228454.5  | 6902.098  | 86012.56  | 55234.43  | 55587.78  | 61821.86  | 57033.34  | 61876.07  | 61258.24  |
| 399132.6  | 267578.3  | 10942.92  | 90994.76  | 60028.43  | 79582.71  | 68714.44  | 57764.48  | 63400.82  | 60777.49  |

|           |           |           |           |           |           |           |           |           |           |
|-----------|-----------|-----------|-----------|-----------|-----------|-----------|-----------|-----------|-----------|
| LP330.008 | LP330.009 |
| 64091.82  | 70809.71  | 57460.65  | 62018.7   | 83882.51  | 72303.43  | 63623.67  | 51489.19  | 47155.88  | 72985.65  |
| 63005.91  | 77539.52  | 61718.51  | 50940.71  | 77287.01  | 75244     | 60474.09  | 54507.92  | 52006.4   | 65918.68  |
| 62809.92  | 76095.07  | 56759.62  | 64740.52  | 70327.82  | 89355.84  | 66089.95  | 51267.09  | 54902.05  | 77102.89  |
| 63611.89  | 94357.11  | 60315.47  | 62835.1   | 75136.77  | 69869.84  | 63336.22  | 56333.52  | 53888.17  | 74883.07  |
| 59164.25  | 81832.93  | 63707.28  | 62044.57  | 78596.86  | 73688.4   | 65136.9   | 55815.6   | 54059.37  | 73102.97  |

|           |           |           |           |           |           |           |           |           |           |
|-----------|-----------|-----------|-----------|-----------|-----------|-----------|-----------|-----------|-----------|
| LP330.008 | LP330.008 | LP330.008 | LP330.008 | LP330.008 | LP330.008 | LP330.009 | LP330.008 | LP330.008 | LP330.009 |
| 49112.56  | 75175.22  | 44309.72  | 78679     | 54711.94  | 46494.63  | 65890.37  | 62631.51  | 61499.56  | 100719.8  |
| 48854.57  | 72159.89  | 52778.41  | 81923.4   | 61562.52  | 48035.17  | 77272.06  | 65275.24  | 67307.08  | 95571.52  |
| 46061.57  | 75975.84  | 51255.26  | 76961.36  | 60980.54  | 41039.49  | 70780.45  | 66446.92  | 63852.81  | 95806.36  |
| 47967.81  | 70419.95  | 48366.5   | 81277.95  | 59469.34  | 49285.42  | 75273.37  | 71189.96  | 66310.24  | 100791.9  |
| 44095.8   | 72485.41  | 57103.48  | 81503.94  | 57681.55  | 49663.36  | 77904.9   | 66113.4   | 68171.55  | 101043.8  |

|           |           |           |           |           |           |           |           |           |           |
|-----------|-----------|-----------|-----------|-----------|-----------|-----------|-----------|-----------|-----------|
| LP330.008 | LP330.008 | LP330.009 | LP330.009 | LP330.009 | LP330.009 | LP330.008 | LP330.008 | LP330.009 | LP330.009 |
| 47083.29  | 80979.36  | 104581.3  | 80391.21  | 95558.37  | 69585.37  | 73849.48  | 41905.3   | 90178.34  | 68484.19  |
| 50987.51  | 79438.32  | 108606.5  | 83016.04  | 98501.13  | 70846.3   | 70052.62  | 55094.18  | 88890.8   | 75456.01  |
| 56981.91  | 85626.44  | 112770.7  | 77907.51  | 94346.38  | 72287.38  | 70249.51  | 49997.58  | 97561.03  | 67637     |
| 51056.65  | 95377.04  | 103627.3  | 82245.8   | 97948.41  | 71350.58  | 71856.73  | 48615.3   | 95163.89  | 71353.42  |
| 53780.71  | 84139     | 104661.3  | 76878.34  | 99978.41  | 75266.35  | 73006.63  | 52527.34  | 94229.2   | 69260.47  |

|           |           |           |           |           |           |           |           |           |           |
|-----------|-----------|-----------|-----------|-----------|-----------|-----------|-----------|-----------|-----------|
| LP330.008 | LP330.008 | LP330.008 | LP330.009 | LP330.009 | LP330.009 | LP330.008 | LP330.008 | LP330.246 | LP330.263 |
| 77678.72  | 49096.13  | 54690.49  | 88796.68  | 76759.7   | 75841.95  | 45130.16  | 40895.96  | 45625.47  | 28919.89  |
| 83988.15  | 53021.88  | 54062.27  | 96866.54  | 73661.77  | 74078.9   | 50681.85  | 37445.95  | 43524.58  | 35165.35  |
| 84232.52  | 48959.96  | 56344.72  | 100727.1  | 78063.62  | 68989.42  | 46440.97  | 34914.68  | 44578.81  | 35210.11  |
| 78058.07  | 54764.58  | 52793.91  | 94717.22  | 82522.74  | 80168.23  | 45465.99  | 42011.71  | 34733.4   | 37989.17  |
| 82290.66  | 52222.89  | 49916.29  | 104284.9  | 80246.84  | 78183.14  | 48296.05  | 34947.2   | 36545.55  | 35211.33  |

|           |           |           |           |           |           |           |           |           |           |
|-----------|-----------|-----------|-----------|-----------|-----------|-----------|-----------|-----------|-----------|
| LP330.337 | LP331.166 | LP331.174 | LP331.173 | LP331.173 | LP331.173 | LP331.173 | LP331.284 | LP331.916 | LP331.916 |
| 25302.55  | 14025.37  | 36502.9   | 62214     | 56341.08  | 49651.15  | 56416.98  | 1116098   | 24834.02  | 33726.22  |
| 24826.3   | 16288.74  | 34896.27  | 58625.89  | 52494.79  | 49562.51  | 56395.89  | 1242170   | 25219.46  | 33983.52  |
| 25664.26  | 21376.02  | 39062.75  | 62485.86  | 47789.72  | 54416.58  | 51818.96  | 1629172   | 27090.98  | 35649     |
| 24253.73  | 14598.29  | 34951.81  | 61267.67  | 55146.32  | 54913.27  | 57520.01  | 1845985   | 34988.69  | 38033.86  |
| 23258.6   | 16538.87  | 32059.54  | 57653.26  | 51360.24  | 51280.18  | 63252.12  | 1932663   | 32065.38  | 34157.56  |

|           |           |           |           |           |           |           |           |           |           |
|-----------|-----------|-----------|-----------|-----------|-----------|-----------|-----------|-----------|-----------|
| LP331.916 | LP331.916 | LP331.916 | LP331.916 | LP331.916 | LP331.916 | LP331.915 | LP332.206 | LP332.206 | LP332.207 |
| 19071.55  | 33962.46  | 24856.16  | 33440.82  | 23447.21  | 33878.49  | 29439.99  | 78672.95  | 97720.98  | 61079.48  |
| 17688.81  | 35332.81  | 25438.05  | 35208.55  | 22362.14  | 35898.84  | 22707.02  | 81777.13  | 94401.09  | 41228.34  |
| 20894.11  | 37968.13  | 28456.93  | 35630.18  | 24660.25  | 35718.04  | 32653.66  | 84182.77  | 81842.54  | 60282.92  |
| 24694.27  | 46819.09  | 30414.11  | 41684.38  | 31495.16  | 42148.09  | 34831.74  | 77924.04  | 94351.37  | 67798.25  |
| 21280.51  | 39118.1   | 27585.4   | 36967.55  | 23589.09  | 37189.75  | 31771.59  | 77928.16  | 96660.14  | 48822.29  |

|           |           |           |           |           |           |           |           |           |           |
|-----------|-----------|-----------|-----------|-----------|-----------|-----------|-----------|-----------|-----------|
| LP332.207 | LP332.207 | LP332.206 | LP332.207 |
| 83322     | 62234.15  | 60762.12  | 78512.87  | 73690.27  | 62299.33  | 99961.57  | 41910.34  | 82339.41  | 56463.45  |
| 81777.21  | 62857.76  | 69513.14  | 81425.21  | 65163.22  | 65064.5   | 99164.03  | 39620.02  | 71104.98  | 61008.35  |
| 82320.9   | 61836.75  | 60296.53  | 83202.46  | 63904.75  | 50216.67  | 109344.5  | 39944.8   | 74181.77  | 45479.05  |
| 81543.21  | 61957.06  | 66259.9   | 84516.21  | 76231.95  | 60029.94  | 103387.1  | 38171.99  | 71548.82  | 53644.29  |
| 80644.75  | 58006.45  | 59485.85  | 81651.75  | 70063.73  | 56778.93  | 100182.6  | 43391     | 73331.56  | 58384.46  |



|           |           |           |           |           |           |           |           |           |           |
|-----------|-----------|-----------|-----------|-----------|-----------|-----------|-----------|-----------|-----------|
| LP332.207 | LP332.207 | LP332.206 | LP332.207 | LP332.207 | LP332.207 | LP332.207 | LP332.206 | LP332.206 | LP332.206 |
| 72656.23  | 61652.83  | 97967.04  | 65629.38  | 68447.14  | 126007    | 70819.36  | 76517.48  | 82520.11  | 74360.13  |
| 70207.66  | 58351.74  | 102116.9  | 56617.18  | 61369.15  | 124157.5  | 73921.74  | 68083.44  | 97824.95  | 66855.5   |
| 68114.44  | 60652.49  | 94771.8   | 60716.68  | 59193.47  | 89222.23  | 69403.21  | 74824.58  | 76146.38  | 65406.32  |
| 74752.96  | 52634.07  | 99943.68  | 61770.86  | 65486.2   | 121555.5  | 69172.62  | 74111.64  | 93593.97  | 78719.23  |
| 67733.56  | 61258.3   | 106118.7  | 51148     | 64098.87  | 119859    | 74476.43  | 72517.39  | 83265.78  | 81868.94  |

|           |           |           |           |           |           |           |           |           |           |
|-----------|-----------|-----------|-----------|-----------|-----------|-----------|-----------|-----------|-----------|
| LP332.207 | LP332.206 | LP332.206 | LP332.207 | LP332.206 | LP332.207 | LP332.242 | LP332.243 | LP332.243 | LP332.243 |
| 55665.94  | 74842.79  | 67532.34  | 67105.03  | 67935.41  | 73116.72  | 79498.2   | 59345.46  | 58769.72  | 68337.95  |
| 50772.46  | 64575.6   | 71864.97  | 65578.83  | 63705.58  | 73288.16  | 73348.14  | 53141.05  | 52793.69  | 68678.2   |
| 59551.69  | 82111.26  | 59924.76  | 67614.18  | 71956.04  | 67698.27  | 70740.07  | 55993.99  | 46666.26  | 68904.66  |
| 53586.47  | 82549.93  | 69906.09  | 68461.52  | 71199.98  | 77922.3   | 70646.12  | 65300.17  | 54959.87  | 59210.11  |
| 55246.64  | 78479.36  | 70992.39  | 64996.48  | 70558.89  | 78277.53  | 118983    | 63223.75  | 52085.45  | 69798.37  |

|           |           |           |           |           |           |           |           |           |           |
|-----------|-----------|-----------|-----------|-----------|-----------|-----------|-----------|-----------|-----------|
| LP332.242 | LP332.243 | LP332.242 | LP332.243 |
| 66293.6   | 69818.52  | 53051.38  | 60594.34  | 71858.51  | 46883.9   | 49402.18  | 59991.41  | 52661.79  | 66926.94  |
| 75930.41  | 73574.81  | 52624.89  | 67662.13  | 61343.69  | 52803.13  | 58006.3   | 62137.92  | 55101.99  | 59353.32  |
| 64353.83  | 71158.94  | 53740.27  | 60645.59  | 68750.44  | 51039.52  | 59580.86  | 53798.44  | 54221.04  | 62498.34  |
| 59820.7   | 71961.47  | 59662.86  | 60278.98  | 65660.57  | 50271.64  | 54744.38  | 59705.48  | 54898.06  | 63840.63  |
| 57911.5   | 64292.77  | 57318.82  | 70535.75  | 65307.16  | 51414.32  | 60399.79  | 53910.06  | 51941.98  | 66001.54  |

|           |           |           |           |           |           |           |           |           |           |
|-----------|-----------|-----------|-----------|-----------|-----------|-----------|-----------|-----------|-----------|
| LP332.243 |
| 66793.51  | 90558.01  | 47612.87  | 78624.95  | 53125.16  | 83023.18  | 55338.8   | 59867.38  | 65932.77  | 60442.92  |
| 69831.16  | 82217.7   | 41510.93  | 82994.5   | 58171.17  | 81867.19  | 57745.42  | 67369.26  | 64195.25  | 55213.49  |
| 69310.93  | 94174.15  | 43317.86  | 88922.02  | 54088.14  | 85564.46  | 55779.08  | 61578.33  | 62105.66  | 54201.66  |
| 68854.93  | 90399.39  | 46722.85  | 85564.46  | 49165.86  | 91836.07  | 56220.62  | 61632.37  | 60108.41  | 63103.51  |
| 75009.34  | 81262.96  | 50079.43  | 84461.02  | 53592.88  | 81597.55  | 57802.71  | 60167.93  | 63503.84  | 58216.62  |

|           |           |           |           |           |           |           |           |           |           |
|-----------|-----------|-----------|-----------|-----------|-----------|-----------|-----------|-----------|-----------|
| LP332.243 | LP332.243 | LP332.242 | LP332.243 | LP332.243 | LP332.243 | LP332.243 | LP332.243 | LP332.279 | LP332.292 |
| 48257.36  | 39002.99  | 62724.41  | 62238.21  | 76665.45  | 71315.8   | 79646.61  | 53233.64  | 68900.9   | 79293.43  |
| 50983.9   | 37069.48  | 61350.44  | 60307.39  | 77807.4   | 68398.24  | 79665.2   | 57243.72  | 66886.07  | 68973.71  |
| 49149.98  | 44429.83  | 59597.63  | 58872.31  | 79990.36  | 68736.57  | 75793.7   | 60012.75  | 84579.32  | 64754.37  |
| 46863.6   | 42096.85  | 66082.63  | 61731.28  | 84863.86  | 75520.94  | 81792.56  | 56899.41  | 66713.71  | 46755.67  |
| 51879.79  | 42982.17  | 62635.42  | 62706.28  | 76958.13  | 64224.03  | 77548.03  | 56653.93  | 57981.69  | 51331.94  |

|           |           |           |           |           |           |           |           |           |           |
|-----------|-----------|-----------|-----------|-----------|-----------|-----------|-----------|-----------|-----------|
| LP332.331 | LP332.964 | LP332.964 | LP333.296 | LP334.186 | LP334.186 | LP334.186 | LP334.186 | LP334.186 | LP334.185 |
| 44629.28  | 12493411  | 55818.8   | 16710.02  | 76795.81  | 95963.83  | 69393.73  | 117260.2  | 71388.5   | 124936.3  |
| 42627.3   | 10921452  | 61131     | 18675.06  | 108415.6  | 118979    | 95648.65  | 105729.4  | 66072.12  | 131417.8  |
| 43460.2   | 13717734  | 57315.28  | 21894.67  | 86097.35  | 104140.9  | 77167.36  | 99292.65  | 63168.35  | 126561.4  |
| 46567.48  | 9428509   | 48103.93  | 14329.63  | 82300.74  | 103374.1  | 76317.08  | 102618    | 68105.21  | 132309.2  |
| 35041.83  | 8983783   | 46525.31  | 18629.23  | 86486.25  | 99926.14  | 73711.14  | 114214.5  | 65090.98  | 131772.1  |

|           |           |           |           |           |           |           |           |           |           |
|-----------|-----------|-----------|-----------|-----------|-----------|-----------|-----------|-----------|-----------|
| LP334.186 | LP334.185 | LP334.186 | LP334.186 | LP334.186 | LP334.186 | LP334.186 | LP334.185 | LP334.186 | LP334.185 |
| 92850.54  | 62358.3   | 84058.52  | 60810.39  | 107960.9  | 111330    | 63250.1   | 63226.87  | 101284.7  | 84706.01  |
| 97876.68  | 68153.96  | 91176.78  | 73953.03  | 127522.2  | 115023.4  | 75896.77  | 75482.13  | 105238.9  | 97043.88  |
| 87010.34  | 65256.35  | 85423.94  | 64994.32  | 114592.3  | 108502.6  | 64458.71  | 61813.61  | 97767.67  | 88875.24  |
| 88254.21  | 64438.49  | 87005.65  | 65367.97  | 103760    | 112055.8  | 68530.21  | 62195.23  | 99283.47  | 100753.9  |
| 100270.7  | 67383.04  | 89763.37  | 64826.62  | 119200.9  | 107924.8  | 68039.58  | 59159.4   | 99786.87  | 91708.19  |

|           |           |           |           |           |           |           |           |           |           |
|-----------|-----------|-----------|-----------|-----------|-----------|-----------|-----------|-----------|-----------|
| LP334.186 | LP334.185 | LP334.222 |
| 93006.78  | 97203.05  | 85473.7   | 128883.8  | 124895.3  | 80443.83  | 83932     | 71740.5   | 106892.5  | 99860.72  |
| 100682.3  | 102562.3  | 100770.8  | 142746.5  | 119110.1  | 106378.7  | 100863.3  | 68129.23  | 108627.9  | 101325.4  |
| 95803.78  | 107430.1  | 102233.8  | 128674.5  | 165615.1  | 90940.56  | 126314    | 73101.72  | 117895.8  | 93504.08  |
| 94623.38  | 111143.4  | 85503.31  | 143716.2  | 95672.27  | 101022.4  | 97632.58  | 66804.4   | 106247.2  | 91423.28  |
| 107396.4  | 99660.19  | 94776.44  | 143540.6  | 150167    | 74623.83  | 96838.47  | 69315.1   | 109189.9  | 121498.9  |



|           |           |           |           |           |           |           |           |           |           |
|-----------|-----------|-----------|-----------|-----------|-----------|-----------|-----------|-----------|-----------|
| LP334.222 |
| 121165.3  | 110547.5  | 65070.19  | 52348.59  | 141507.5  | 114520    | 97258.97  | 104437.4  | 78199.12  | 109694.7  |
| 110699.1  | 115437.5  | 87000.12  | 83056.39  | 154583.9  | 108549.1  | 100006.3  | 102852.2  | 80358.66  | 113019.7  |
| 114873.1  | 93001.33  | 72308.94  | 90859.81  | 121825    | 123333.2  | 97727.75  | 95847.19  | 80712.23  | 113667.6  |
| 134025.3  | 109951.7  | 72196.08  | 85939.29  | 160810.2  | 119605.1  | 97151.17  | 95350.98  | 81060.75  | 114236.8  |
| 103006.5  | 107334.3  | 77803.18  | 88013.01  | 151903.1  | 107377.7  | 99425.43  | 101149.8  | 83033.27  | 114382.2  |

|           |           |           |           |           |           |           |           |           |           |
|-----------|-----------|-----------|-----------|-----------|-----------|-----------|-----------|-----------|-----------|
| LP334.222 |
| 68273.35  | 73011.06  | 96268.6   | 71092.98  | 95359.08  | 84620.1   | 107673.1  | 79860.24  | 55347.42  | 85338.13  |
| 68550.08  | 69056.8   | 85227.4   | 69194.85  | 93905.76  | 89957.89  | 108649    | 79949.43  | 92035.17  | 81410.78  |
| 80201.69  | 74343.62  | 91665.32  | 75182.47  | 91423.89  | 68635.83  | 100745.6  | 81358.07  | 85031.08  | 86590.85  |
| 74796.99  | 75972.23  | 91237.26  | 75181.07  | 106358    | 86998.55  | 110153.7  | 82144.47  | 89171.45  | 85773.8   |
| 78740.05  | 68029.85  | 89400.32  | 71476.46  | 86852.6   | 80977.01  | 106822.1  | 71511.79  | 88790.67  | 79844.97  |

|            |            |            |            |            |            |            |            |            |            |
|------------|------------|------------|------------|------------|------------|------------|------------|------------|------------|
| LP334.222! |
| 92880.51   | 179923.3   | 87970.53   | 91972.49   | 108085.9   | 66796.77   | 83383.46   | 141764.2   | 74325.02   | 92773.77   |
| 87330.13   | 172438.1   | 81521.14   | 80828.31   | 109235.7   | 62058.75   | 69207.21   | 148413.6   | 73459.55   | 91873.7    |
| 93631.38   | 182911.3   | 98414.91   | 85990.52   | 123081.9   | 69860.17   | 73599.3    | 123608.4   | 66171.92   | 83667.44   |
| 94431.53   | 187092.3   | 88242.98   | 84061.21   | 108962.8   | 71298.06   | 75595.95   | 146902.1   | 74534.18   | 94866.2    |
| 94956.22   | 167678     | 82744.03   | 77169.51   | 105110.2   | 65972.04   | 68462.46   | 146758.6   | 67603.02   | 96817.37   |

|           |           |           |           |           |           |           |           |           |           |
|-----------|-----------|-----------|-----------|-----------|-----------|-----------|-----------|-----------|-----------|
| LP334.222 |
| 76276.53  | 88953.99  | 112778.2  | 69982.61  | 121913.1  | 92912.86  | 89183.08  | 82739.49  | 112621    | 99839.04  |
| 77409.58  | 91632.62  | 114007    | 63980.05  | 130503.4  | 95694.2   | 88453.13  | 79137.54  | 101665.3  | 107238.5  |
| 88028.59  | 81943.96  | 109864.7  | 56020.19  | 118194.6  | 87891.91  | 84643.35  | 81305.38  | 105747.8  | 111889.9  |
| 83948.39  | 93214.72  | 110841.9  | 78583.42  | 135601.5  | 96193.17  | 89720.61  | 83309.81  | 111787.1  | 104500.6  |
| 68533.52  | 86948.96  | 109436.9  | 77591.68  | 131671    | 96932.01  | 93054.4   | 83540.31  | 109285.5  | 102028.4  |

|           |           |           |           |           |           |           |           |           |           |
|-----------|-----------|-----------|-----------|-----------|-----------|-----------|-----------|-----------|-----------|
| LP334.222 |
| 134427    | 80335.43  | 75706.01  | 72872.66  | 81977.19  | 92371.6   | 94328.77  | 90720.08  | 106698.5  | 63719.75  |
| 128127    | 85457.88  | 63458     | 66269.43  | 77733.02  | 92708.76  | 97840.62  | 92561.97  | 98335.11  | 100467.1  |
| 137272    | 92186.48  | 70905.37  | 69363.19  | 76299.63  | 98308.46  | 91281.67  | 106832.9  | 100934.9  | 104111.9  |
| 129825    | 80144.29  | 70397.17  | 67549.46  | 74896.03  | 94586.69  | 96714.05  | 92911.97  | 77377.41  | 97033.36  |
| 137281.7  | 85087.11  | 69387.85  | 68180.55  | 85919.62  | 99823.28  | 87900.47  | 94082.53  | 114978.8  | 102828.8  |

|           |           |           |           |           |           |           |           |           |           |
|-----------|-----------|-----------|-----------|-----------|-----------|-----------|-----------|-----------|-----------|
| LP334.222 | LP334.222 | LP334.222 | LP334.222 | LP334.222 | LP334.222 | LP334.310 | LP334.308 | LP334.308 | LP334.309 |
| 95692.05  | 98261.14  | 88362.25  | 75000.93  | 80123.67  | 110630.5  | 38994.33  | 40842.74  | 50687.04  | 45016.36  |
| 92413.85  | 101451.2  | 83104.1   | 76310.41  | 79424.89  | 105266.7  | 39820.36  | 38176.18  | 54239.1   | 43206.61  |
| 70877.89  | 77336.53  | 76861.27  | 85886.44  | 84398.64  | 107656.2  | 46831.04  | 41709.78  | 69147.68  | 49060.85  |
| 94721.33  | 101230.7  | 89616.19  | 84594.63  | 74679.77  | 112938.1  | 45409.44  | 46024.32  | 74430.83  | 49930.55  |
| 99060.15  | 92642.16  | 88705.42  | 87051.51  | 74265.37  | 105706.6  | 18862.22  | 35228.71  | 71766.68  | 37701.37  |

|           |           |           |           |           |           |           |           |           |           |
|-----------|-----------|-----------|-----------|-----------|-----------|-----------|-----------|-----------|-----------|
| LP334.310 | LP334.96_ | LP335.221 | LP335.221 | LP335.221 | LP335.279 | LP335.294 | LP335.294 | LP335.294 | LP335.294 |
| 42304.18  | 2109508   | 41845.31  | 49502.6   | 41419.26  | 41175.35  | 20553.85  | 39254.35  | 50917.59  | 27684.39  |
| 39498.6   | 2047825   | 38056.07  | 46520.82  | 42457.46  | 39576.63  | 23614.14  | 34158.12  | 46684.27  | 29134.42  |
| 44914.58  | 1866745   | 31975.23  | 49488.49  | 52828.36  | 43378.04  | 20466.99  | 36103.37  | 46897.99  | 31678.9   |
| 43752.41  | 1603787   | 37167.65  | 52290.12  | 48745.36  | 38297.04  | 20243.86  | 42248.4   | 50605.26  | 30039.16  |
| 36794.06  | 1474518   | 35248.2   | 41536.11  | 43048.54  | 39066.31  | 20043.57  | 33621.84  | 54961.14  | 30799.89  |

|           |           |           |           |           |           |           |           |           |           |
|-----------|-----------|-----------|-----------|-----------|-----------|-----------|-----------|-----------|-----------|
| LP336.221 | LP336.237 | LP336.237 | LP336.237 | LP336.237 | LP336.238 | LP336.237 | LP336.238 | LP336.238 | LP336.238 |
| 106505.5  | 177800.4  | 96593.1   | 104781.5  | 140576.3  | 159241.9  | 174368.2  | 65188.42  | 154192.4  | 203055.7  |
| 97635.34  | 173691.6  | 79553.38  | 112066.1  | 137397.3  | 151651    | 176224.9  | 60375.44  | 145746.4  | 187449.3  |
| 95951.79  | 183204.3  | 96729.43  | 116457.6  | 161005.1  | 173075.7  | 186648.2  | 62066.23  | 153915.5  | 205641.6  |
| 86271.8   | 198118.9  | 91364.28  | 117993.2  | 141352    | 104643.8  | 139681.9  | 60712.9   | 133614.5  | 148104.8  |
| 93823.15  | 106935.8  | 55263.15  | 84808.37  | 149807.9  | 116013.3  | 129199.1  | 74213.1   | 105233.9  | 130672.9  |



|           |           |           |           |           |           |           |           |           |           |
|-----------|-----------|-----------|-----------|-----------|-----------|-----------|-----------|-----------|-----------|
| LP336.238 | LP336.238 | LP336.237 | LP336.238 |
| 119303.8  | 171505.2  | 140677.5  | 164508    | 154822.2  | 96205.26  | 175617.2  | 154103.9  | 127727.6  | 112999.6  |
| 121775.3  | 166002.1  | 140987.1  | 149377.2  | 153150.3  | 102466.7  | 197899.2  | 144712.7  | 139401.5  | 120594.6  |
| 134482.2  | 166481    | 149677.4  | 152626    | 166992    | 107102.3  | 194013.6  | 166814.1  | 144356.5  | 119910.3  |
| 145299.7  | 193662.9  | 156494.9  | 102553.1  | 164212.3  | 112311.5  | 122448.1  | 175033.1  | 138992.4  | 125740.6  |
| 85759.13  | 96402.41  | 95093.83  | 162428    | 108497    | 87817.2   | 123055.3  | 99655.29  | 96252.43  | 111886.4  |

|           |           |           |           |           |           |           |           |           |           |
|-----------|-----------|-----------|-----------|-----------|-----------|-----------|-----------|-----------|-----------|
| LP336.238 |
| 130924.6  | 139191.4  | 110935.4  | 130106.6  | 131782.8  | 85830.29  | 137217.4  | 163904    | 182549    | 122538.4  |
| 128723    | 142544.8  | 111708.7  | 134342.6  | 130647.2  | 81491.79  | 138897.5  | 166653    | 160506.4  | 117308.5  |
| 138275.1  | 145119.3  | 111689    | 134315.5  | 131963.6  | 90913.68  | 142759.2  | 165113    | 184602.3  | 132506.8  |
| 141519.9  | 154649.5  | 107125.8  | 139982.1  | 138425.3  | 82256.34  | 139013.1  | 168219    | 173509.2  | 76448.4   |
| 94899.76  | 101493.3  | 110209.5  | 84473.05  | 78032.92  | 58890.31  | 103308.5  | 109605    | 137001    | 139189.7  |

|           |           |           |           |           |           |           |           |           |           |
|-----------|-----------|-----------|-----------|-----------|-----------|-----------|-----------|-----------|-----------|
| LP336.238 | LP336.237 | LP336.238 | LP336.238 | LP336.238 | LP336.238 | LP336.238 | LP336.238 | LP336.237 | LP336.238 |
| 92302.17  | 113982.6  | 124726.9  | 134406.9  | 126798    | 163743    | 139120.4  | 232374.4  | 137457.2  | 133713.7  |
| 95038.13  | 110171.2  | 119422    | 134122.2  | 133621.8  | 170378.5  | 144270.1  | 234482    | 139741.7  | 134478.4  |
| 87404.86  | 114747.3  | 127641.8  | 151987.1  | 122325.8  | 173987.5  | 156888    | 228790.5  | 138893.7  | 139853.3  |
| 96230.75  | 107070.9  | 125977    | 144810    | 75873     | 178545.4  | 147058.2  | 246358.3  | 147203.7  | 142345.6  |
| 61695.1   | 67061.77  | 75610.29  | 145266.1  | 126778.1  | 186470.8  | 88733.15  | 144617.2  | 86342.96  | 83305.21  |

|           |           |           |           |           |           |           |           |           |           |
|-----------|-----------|-----------|-----------|-----------|-----------|-----------|-----------|-----------|-----------|
| LP336.238 | LP336.238 | LP336.238 | LP336.237 | LP336.238 | LP336.237 | LP336.238 | LP336.238 | LP336.238 | LP336.238 |
| 155990.3  | 136769    | 117898.2  | 145351.1  | 153938.8  | 163708.5  | 85372.08  | 160447    | 97420.54  | 105559.6  |
| 158889.6  | 130178.3  | 123659.1  | 139572.2  | 145774.3  | 173302.9  | 83776.19  | 179990.8  | 95996.58  | 110413    |
| 160900.7  | 135137.5  | 115939.8  | 146248.9  | 149999.3  | 180255    | 89375.16  | 186415.7  | 85276.71  | 121565.5  |
| 166167.2  | 139336.1  | 131672.9  | 148450.3  | 160119.5  | 180274.2  | 90200.78  | 185429.4  | 94088.82  | 114792.2  |
| 105911.2  | 82872.24  | 76492.07  | 91035.48  | 88497.3   | 110192.2  | 60231.25  | 102069.9  | 71869.55  | 80929.73  |

|           |           |           |           |           |           |           |           |           |           |
|-----------|-----------|-----------|-----------|-----------|-----------|-----------|-----------|-----------|-----------|
| LP336.238 | LP336.237 | LP336.238 | LP336.238 | LP336.238 | LP336.238 | LP336.237 | LP336.237 | LP336.238 | LP336.311 |
| 84840.68  | 121658.1  | 177293.9  | 100873    | 181276.4  | 107142.1  | 118033    | 153819.3  | 220037.1  | 17062.84  |
| 87120.21  | 129810.5  | 169304.5  | 108094.2  | 177883.8  | 107314.6  | 120564.5  | 160826.6  | 204835.4  | 16740.57  |
| 88163.5   | 136390.7  | 173396.5  | 110348    | 185178.3  | 110685.2  | 128127.8  | 163305.7  | 214843.6  | 15611.98  |
| 87413.51  | 132446.5  | 189628.3  | 107606    | 188947    | 112412.9  | 92101.05  | 117768.5  | 126171.1  | 16574.07  |
| 89356.35  | 135779.9  | 135298.4  | 70698.43  | 114048.9  | 84673.03  | 107579.4  | 105554.1  | 229160.1  | 12685.52  |

|           |           |           |           |           |           |           |           |           |           |
|-----------|-----------|-----------|-----------|-----------|-----------|-----------|-----------|-----------|-----------|
| LP336.326 | LP336.326 | LP336.326 | LP336.955 | LP337.200 | LP337.224 | LP337.236 | LP337.236 | LP337.236 | LP337.236 |
| 156171.2  | 274689    | 74830.89  | 132763.4  | 182070.1  | 33652.84  | 42195.9   | 44229.91  | 42033.32  | 38409.78  |
| 140581.3  | 328071.6  | 83571.31  | 124599.5  | 254249.6  | 32493.7   | 36692.33  | 45491.52  | 33510.62  | 33614.63  |
| 108897.1  | 242912.5  | 77114.87  | 115812.4  | 266483.6  | 32446.33  | 30095.93  | 39425.87  | 41373.27  | 35398.56  |
| 190617.8  | 172780    | 79218.09  | 107234.4  | 250381.3  | 17913.32  | 34158.39  | 43630.1   | 34507.4   | 35375.89  |
| 126549.6  | 240766.3  | 71531.57  | 95572.39  | 291799.1  | 21036.52  | 36476.57  | 40047.41  | 35636.37  | 39804.62  |

|           |           |           |           |           |           |           |           |           |           |
|-----------|-----------|-----------|-----------|-----------|-----------|-----------|-----------|-----------|-----------|
| LP337.236 | LP337.253 | LP337.271 | LP337.274 | LP337.274 | LP337.273 | LP337.274 | LP337.292 | LP337.308 | LP337.310 |
| 30634.9   | 38955.18  | 102401.3  | 49909.32  | 67279.41  | 39362.67  | 50327.3   | 48043.11  | 103968.8  | 42897.51  |
| 38370.95  | 40179.67  | 104175.1  | 40394.27  | 59764.81  | 38464.19  | 47741.18  | 46935.69  | 122780.7  | 46895.4   |
| 45342.67  | 40899.1   | 121934.3  | 43815.57  | 62996.55  | 39326.98  | 50749.74  | 49718.19  | 109604.3  | 41437.7   |
| 46161.43  | 44256     | 127009.5  | 43374.67  | 62716.4   | 40635.21  | 46460.37  | 51655.08  | 103777.3  | 45184.07  |
| 36607.75  | 43219.12  | 130584.3  | 43862.33  | 68441.85  | 41539.96  | 48347.92  | 45077.56  | 111666.5  | 43134.68  |

|           |           |           |           |           |           |           |           |           |           |
|-----------|-----------|-----------|-----------|-----------|-----------|-----------|-----------|-----------|-----------|
| LP337.310 | LP337.310 | LP337.310 | LP337.310 | LP338.172 | LP338.232 | LP338.232 | LP338.232 | LP338.232 | LP338.232 |
| 56439.01  | 56638.18  | 48987.21  | 53642.32  | 67746.25  | 122734.7  | 144381.2  | 157973.4  | 131403.5  | 117222    |
| 47963.59  | 60639.25  | 54148.47  | 50643.07  | 67852.2   | 124620.6  | 116780.1  | 162750.4  | 162967.2  | 120696.5  |
| 49358.12  | 58971.13  | 48061.74  | 53056.16  | 67320.44  | 117587.9  | 125105.2  | 128802.9  | 160101.8  | 122201.6  |
| 53185.92  | 57541.29  | 44807.1   | 49278.67  | 67634.37  | 127354.3  | 139645.1  | 149784.9  | 172594.5  | 104007.6  |
| 49766.95  | 51504.83  | 48783.8   | 51767.65  | 70898.53  | 120959.2  | 136442.5  | 176473.1  | 169667.1  | 109065.5  |



|           |           |           |           |           |           |           |           |           |           |
|-----------|-----------|-----------|-----------|-----------|-----------|-----------|-----------|-----------|-----------|
| LP338.232 |
| 177767.5  | 168865.3  | 170380.7  | 117619.2  | 86541.25  | 83896.8   | 95826.29  | 95427.68  | 127740.9  | 95496.35  |
| 178814.1  | 164746.4  | 84346.1   | 94231.54  | 86843.63  | 83854.7   | 90390.72  | 91836.69  | 123942.2  | 101828    |
| 173799.3  | 174760.6  | 78624.14  | 92393.12  | 92620.83  | 73734.87  | 85571.71  | 92913.33  | 127487.2  | 92321.67  |
| 200806.7  | 166902.2  | 81058.04  | 100487.5  | 87034.24  | 84948.41  | 96902.78  | 96175.55  | 128538.2  | 81405.15  |
| 172488.3  | 163186.4  | 84695.39  | 98820.93  | 94523.12  | 81291.66  | 92672.69  | 92854.65  | 118942.3  | 115934.5  |

|           |           |           |           |           |           |           |           |           |           |
|-----------|-----------|-----------|-----------|-----------|-----------|-----------|-----------|-----------|-----------|
| LP338.232 | LP338.231 | LP338.232 |
| 171822.4  | 108798.2  | 107633.3  | 44385.69  | 83328.85  | 212770.4  | 90752.31  | 114555.8  | 59080.78  | 104361.3  |
| 156030.1  | 112262.9  | 114458.9  | 50829.89  | 96021.99  | 212472.1  | 102784.7  | 113987.7  | 54603     | 98882.16  |
| 147346.7  | 104556.3  | 113496.7  | 42201.53  | 84322.04  | 198300.5  | 96176.57  | 117856.6  | 55076.03  | 102793.7  |
| 156735.1  | 114520.5  | 108973.3  | 43671.58  | 81040.68  | 222637.6  | 90450.65  | 121211    | 61619.4   | 112138.1  |
| 155011.9  | 111391.2  | 108209.6  | 51161.21  | 82509.18  | 233305.8  | 89509.56  | 124533.6  | 58678.75  | 107104.4  |

|           |           |           |           |           |           |           |           |           |           |
|-----------|-----------|-----------|-----------|-----------|-----------|-----------|-----------|-----------|-----------|
| LP338.232 | LP338.232 | LP338.233 | LP338.232 |
| 181688.4  | 150567.9  | 130228.8  | 193537.2  | 188563.2  | 35751.97  | 101087.1  | 151059.2  | 199750.5  | 146979    |
| 166296.1  | 141302.7  | 148686.9  | 204151.1  | 181318.5  | 34442.56  | 98968.46  | 172910.8  | 198666.2  | 98569.66  |
| 162129    | 142875.2  | 142248.1  | 194383.6  | 165393.6  | 40181.7   | 93699.77  | 159543.9  | 182575.6  | 102868.7  |
| 175494.9  | 139485.8  | 153192.7  | 195383.3  | 175043.4  | 33715.69  | 170433.9  | 179300.4  | 207956    | 103102    |
| 162063    | 133996.7  | 158800.5  | 232582.9  | 172679.3  | 33680.63  | 105701.8  | 171210.7  | 187249.8  | 98079.78  |

|           |           |           |           |           |           |           |           |           |           |
|-----------|-----------|-----------|-----------|-----------|-----------|-----------|-----------|-----------|-----------|
| LP338.232 | LP338.232 | LP338.232 | LP338.233 | LP338.232 | LP338.233 | LP338.232 | LP338.232 | LP338.232 | LP338.233 |
| 156082    | 167400.5  | 160078.7  | 135254.7  | 168694.5  | 158353.6  | 168973.9  | 175737.3  | 151925.7  | 139236.5  |
| 155130.7  | 150796.4  | 158054.7  | 145784.1  | 166157.4  | 157114    | 168297.4  | 181521.4  | 153584.3  | 152834.7  |
| 154604.9  | 156596.8  | 158353    | 145064.8  | 169667.4  | 158670    | 168779.6  | 174687.9  | 156244.9  | 137352    |
| 159933.1  | 172149.6  | 156708.2  | 155387    | 178247.6  | 160724.9  | 158381.4  | 172531.1  | 152976.2  | 142434    |
| 155121.4  | 183947.4  | 173332.6  | 147616.1  | 169975.1  | 169375.9  | 156692.4  | 177965.9  | 144071.9  | 143720.6  |

|           |           |           |           |           |           |           |           |           |           |
|-----------|-----------|-----------|-----------|-----------|-----------|-----------|-----------|-----------|-----------|
| LP338.232 | LP338.232 | LP338.232 | LP338.232 | LP338.233 | LP338.232 | LP338.232 | LP338.232 | LP338.233 | LP338.232 |
| 105507    | 75715.44  | 101938    | 210906.3  | 171219.9  | 78111.57  | 120905.4  | 68682.51  | 157657.6  | 118359.1  |
| 119020.8  | 78700.96  | 106454.4  | 176309.7  | 189549.8  | 80840.49  | 127944.5  | 67350.42  | 139362.5  | 113206.8  |
| 103484.6  | 77279.77  | 116370.8  | 183597.9  | 188840.2  | 73415.91  | 115939.1  | 64194.2   | 146248.3  | 112748.7  |
| 113428.7  | 81909.33  | 125226.5  | 188622.9  | 181620.3  | 71722.02  | 122921.5  | 61282.97  | 151682.2  | 127790.9  |
| 120214.7  | 77465.53  | 108889.5  | 186323.1  | 192646.7  | 72162.72  | 121991.8  | 67115.28  | 156163    | 117833.7  |

|           |           |           |           |           |           |           |           |           |           |
|-----------|-----------|-----------|-----------|-----------|-----------|-----------|-----------|-----------|-----------|
| LP338.233 | LP338.266 | LP338.267 | LP338.275 | LP338.311 | LP338.332 | LP338.341 | LP338.341 | LP338.341 | LP338.341 |
| 103289.1  | 25993.03  | 20874.88  | 240675.1  | 21768.85  | 34152.29  | 4501113   | 23842389  | 4694090   | 708717.7  |
| 101628.4  | 44504.6   | 24848.91  | 222822.9  | 47899.42  | 31919.17  | 3259902   | 21299327  | 4576206   | 568325.4  |
| 98414.02  | 26856.56  | 23246.42  | 210595.2  | 50736.75  | 33621.42  | 4462720   | 27411226  | 6515451   | 655305.7  |
| 94779.66  | 26246.75  | 15648.79  | 205911.4  | 54062.15  | 31075.25  | 4631998   | 23561842  | 6719237   | 690852.7  |
| 94748.41  | 23678.25  | 28688.58  | 183511    | 29313.56  | 37881.36  | 4834711   | 21947333  | 5021506   | 579886.5  |

|           |           |           |           |           |           |           |           |           |           |
|-----------|-----------|-----------|-----------|-----------|-----------|-----------|-----------|-----------|-----------|
| LP338.341 | LP338.341 | LP338.341 | LP338.341 | LP338.342 | LP338.341 | LP338.341 | LP338.342 | LP338.342 | LP338.341 |
| 471618    | 669872.1  | 504974.9  | 577182.2  | 656266.4  | 643743.6  | 503610.9  | 793810.9  | 713518.1  | 4171099   |
| 462242.5  | 581830.7  | 564958.5  | 559369.8  | 768088.3  | 635672    | 599405.6  | 624183.4  | 591761.5  | 2559011   |
| 429083.3  | 645293.3  | 770359.1  | 590325.8  | 908946.6  | 917928.2  | 568011.5  | 944926.2  | 498237.6  | 2974784   |
| 547058.3  | 817685.6  | 492744.6  | 532961.7  | 593975.4  | 745578.4  | 689643    | 584614    | 443169.3  | 2799724   |
| 896419.9  | 430838.8  | 625116    | 476368.9  | 857505.2  | 661601.4  | 447842.7  | 834119.1  | 561574.4  | 2636380   |

|           |           |           |           |           |           |           |           |           |           |
|-----------|-----------|-----------|-----------|-----------|-----------|-----------|-----------|-----------|-----------|
| LP338.342 | LP338.341 | LP338.341 | LP338.341 | LP338.341 | LP338.341 | LP338.342 | LP338.341 | LP338.341 | LP338.342 |
| 928393.5  | 696736.5  | 845080.3  | 609586.5  | 910196.7  | 872824.3  | 843012.4  | 549454.7  | 614665.9  | 673244.8  |
| 696608.8  | 620860.5  | 839213.1  | 468491.5  | 752669.7  | 871644.1  | 821991.6  | 485393.1  | 673641.6  | 700320    |
| 754224.3  | 518852.8  | 934778.6  | 536907.9  | 767024.9  | 667157.7  | 807551.9  | 594404.5  | 541601.3  | 688678.3  |
| 576199.6  | 602135.9  | 842540.6  | 521265.3  | 1146953   | 849469.3  | 796626.3  | 642169.5  | 525173.7  | 615130.5  |
| 819613.4  | 579244.2  | 710857.2  | 491397.5  | 673577.2  | 1011417   | 818447.6  | 569723.3  | 494618.2  | 725864.6  |



|           |           |           |           |           |           |           |           |           |           |
|-----------|-----------|-----------|-----------|-----------|-----------|-----------|-----------|-----------|-----------|
| LP338.341 | LP338.342 | LP338.342 | LP338.342 | LP338.341 | LP338.342 | LP338.342 | LP338.342 | LP338.342 | LP338.342 |
| 814007.8  | 547878.5  | 574389.8  | 566821.9  | 430285.2  | 649219.8  | 535552.6  | 711004    | 522103.4  | 433504.2  |
| 703326.4  | 692915.7  | 644818.4  | 604694.7  | 423651.4  | 691664.6  | 680641.7  | 695195.8  | 392107.2  | 476107.5  |
| 529035.8  | 475940.2  | 632669.9  | 569327.1  | 546715.5  | 598527.4  | 718362.9  | 653984.2  | 564266.3  | 528715.9  |
| 527103    | 563605.1  | 530358.9  | 434258.8  | 428739.8  | 827032.6  | 589692    | 768455.1  | 718843.7  | 556645    |
| 565742.8  | 824912.1  | 708076.9  | 559587.9  | 380471.5  | 489904.3  | 580729.7  | 586515    | 459912.1  | 642234.6  |

|           |           |           |           |           |           |           |           |           |           |
|-----------|-----------|-----------|-----------|-----------|-----------|-----------|-----------|-----------|-----------|
| LP338.342 |
| 680382.1  | 537570.6  | 479527.7  | 837158.3  | 576640.9  | 797314.8  | 763317.1  | 589678.6  | 407089.2  | 618564.5  |
| 581725.8  | 507087.4  | 459571.7  | 597710.3  | 788877.7  | 470648.6  | 791394.4  | 588569.1  | 420535    | 680276.6  |
| 560148.2  | 695097.2  | 507970    | 590050.7  | 546501.5  | 625525    | 637964.7  | 597920.4  | 428112.7  | 641618.8  |
| 678259.1  | 524728.6  | 590460.2  | 801157.6  | 644345.3  | 484588.7  | 679491.6  | 576598.6  | 406074.4  | 926419.1  |
| 561697.4  | 485249.2  | 434609.7  | 530337.3  | 483117.7  | 501123.5  | 551762.3  | 715702.5  | 441766    | 490584    |

|           |           |           |           |           |           |           |           |           |           |           |
|-----------|-----------|-----------|-----------|-----------|-----------|-----------|-----------|-----------|-----------|-----------|
| LP338.341 | LP338.341 | LP338.342 |
| 484192.5  | 192654.7  | 645000.6  | 668484.3  | 528898.6  | 418619.5  | 511311.6  | 396077.4  | 496141.1  | 518718.3  |           |
| 631306.2  | 127332.7  | 558239.9  | 731355.8  | 523329    | 605078.5  | 522342.3  | 361715.3  | 475797.5  | 490625    |           |
| 654955.1  | 144556.5  | 611434.7  | 674895.9  | 511007.1  | 436664.2  | 548716.3  | 372218.5  | 489731.8  | 539870.6  |           |
| 466465.1  | 116764.4  | 453543.9  | 645039.8  | 492262.7  | 466550.8  | 536350.5  | 365773.8  | 480791    | 548221.9  |           |
| 547001.4  | 113517.7  | 820291.7  | 693682.4  | 488915.1  | 465817    | 546392.2  | 519676.8  | 362729.8  | 466172.7  |           |

|           |           |           |           |           |           |           |           |           |           |
|-----------|-----------|-----------|-----------|-----------|-----------|-----------|-----------|-----------|-----------|
| LP338.341 | LP338.342 | LP338.342 | LP338.341 | LP339.141 | LP339.141 | LP339.141 | LP339.141 | LP339.141 | LP339.141 |
| 145442.4  | 506070.7  | 358433.1  | 996108.8  | 58778.85  | 63324.72  | 62845.83  | 76910.93  | 72882.46  | 91876.78  |
| 149705.5  | 505403.6  | 332366    | 1019633   | 71243.26  | 55469.61  | 82146.88  | 51299.23  | 69791.89  | 68841.51  |
| 143230.6  | 548780.7  | 328422.3  | 1087470   | 59939.98  | 63042.92  | 56537.71  | 52874.95  | 68421.11  | 73871.08  |
| 143371.7  | 559237.9  | 365844.7  | 1019361   | 75838.88  | 79032.54  | 94343.68  | 68314.43  | 72083.04  | 74494.5   |
| 159953.1  | 522036.9  | 402759.7  | 1089298   | 73684.96  | 66956.6   | 58173.44  | 65135.83  | 80271.9   | 62873.93  |

|           |           |           |           |           |           |           |           |           |           |
|-----------|-----------|-----------|-----------|-----------|-----------|-----------|-----------|-----------|-----------|
| LP339.142 | LP339.141 | LP339.141 | LP339.141 | LP339.141 | LP339.141 | LP339.141 | LP339.142 | LP339.141 | LP339.141 |
| 99771.51  | 74809.69  | 31321.86  | 66469.95  | 70215.45  | 68762.78  | 64376.4   | 79283.44  | 63435.77  | 66255.93  |
| 76029.56  | 70386.83  | 38345.32  | 62343.35  | 88109.11  | 62234.63  | 61255.7   | 62203.03  | 56544.45  | 77766.03  |
| 78770.79  | 72283.73  | 44655.64  | 88680.48  | 105745.6  | 60334.9   | 77369.45  | 95260.97  | 76708.48  | 67032.56  |
| 81919.32  | 86086.54  | 28130.85  | 64451.59  | 50639.16  | 71013.25  | 94038.13  | 98144.72  | 66741.82  | 59800.67  |
| 65200.87  | 102844.1  | 44018.48  | 49230.75  | 71276.86  | 82958.22  | 83763.49  | 100194.8  | 74377.71  | 72212.4   |

|           |           |           |           |           |           |           |           |           |           |           |
|-----------|-----------|-----------|-----------|-----------|-----------|-----------|-----------|-----------|-----------|-----------|
| LP339.141 |
| 68678.43  | 59664.58  | 87323.28  | 69400.23  | 51837.97  | 53324.84  | 62191.49  | 64650.56  | 50418.51  | 69646.69  |           |
| 93197.71  | 81106.72  | 68847.05  | 90235.97  | 74534.22  | 54520.9   | 68440.32  | 88688.39  | 60794.43  | 40016.52  |           |
| 74631.82  | 68152.42  | 110425.8  | 90845.1   | 75446.76  | 52822.28  | 69861.85  | 60301.23  | 65913.3   | 70681.72  |           |
| 53288.49  | 65768.92  | 65554.01  | 61267.48  | 73463.14  | 64842.13  | 52068.83  | 55464.74  | 62571.44  | 58204.56  |           |
| 96976.8   | 88563.2   | 61167.19  | 78834.63  | 64041.17  | 74306.95  | 70756.86  | 78488.58  | 106905    | 45137.8   |           |

|           |           |           |           |           |           |           |           |           |           |
|-----------|-----------|-----------|-----------|-----------|-----------|-----------|-----------|-----------|-----------|
| LP339.142 | LP339.141 | LP339.141 | LP339.141 | LP339.141 | LP339.142 | LP339.141 | LP339.141 | LP339.141 | LP339.141 |
| 63359.36  | 65406.23  | 87121.01  | 49700.43  | 59424.71  | 105394.3  | 69181.95  | 75662.08  | 62818.4   | 95216.6   |
| 79758.96  | 100878    | 67808.42  | 72338.95  | 85673.48  | 60365.73  | 84253.52  | 68895.35  | 86938.04  | 77816.63  |
| 90308.77  | 91819.31  | 86864.73  | 54790.97  | 74218.18  | 70061.95  | 66226.59  | 77674.74  | 61681.61  | 102975.7  |
| 67464.31  | 75696.63  | 67110.51  | 74046.75  | 58310.83  | 71734.42  | 96457.55  | 60170.64  | 92234.05  | 70048.19  |
| 89904.52  | 66660.35  | 62724.2   | 58410.72  | 57675.61  | 71568.1   | 92755.93  | 65121.64  | 66875.73  | 83313     |

|           |           |           |           |           |           |           |           |           |           |           |
|-----------|-----------|-----------|-----------|-----------|-----------|-----------|-----------|-----------|-----------|-----------|
| LP339.141 |
| 66014.7   | 51124.64  | 27064.51  | 76838.06  | 80332.46  | 83496.09  | 55864.97  | 33794.76  | 56998.89  | 49149.59  |           |
| 69425.44  | 68158.86  | 34129.29  | 60407.99  | 71735.77  | 82597.69  | 80570.26  | 28479.43  | 108638    | 69957.45  |           |
| 78745.14  | 65244.13  | 28772.74  | 70356.66  | 63071.34  | 64336.27  | 55428.89  | 35247.43  | 66545.64  | 91140.9   |           |
| 61304.14  | 56637.03  | 28148.28  | 56370.29  | 102045.2  | 63358.39  | 57063.43  | 38585.07  | 63215.13  | 58640.38  |           |
| 48459.22  | 87078.24  | 31709.12  | 67927.05  | 85942.42  | 75416.98  | 64062.91  | 27748.12  | 75595.52  | 80073.19  |           |



|           |           |           |           |           |           |           |           |           |           |           |
|-----------|-----------|-----------|-----------|-----------|-----------|-----------|-----------|-----------|-----------|-----------|
| LP339.142 | LP339.141 |
| 73433.48  | 48196.14  | 62230.47  | 65231.76  | 67050.11  | 66311.98  | 86794.71  | 62407.72  | 33751.55  | 94105.04  |           |
| 97501.3   | 52236.54  | 61669.35  | 77965.56  | 65281.34  | 64661.86  | 85675.03  | 63562.52  | 42244.44  | 76772.25  |           |
| 67726.56  | 103039    | 65946.57  | 64215.07  | 92035.61  | 96143.71  | 88474.51  | 69291.69  | 35905.92  | 67363.96  |           |
| 71064.18  | 75812.54  | 70621.93  | 66473.16  | 82352.82  | 56832.14  | 83521.58  | 49798.72  | 34234.06  | 85345.11  |           |
| 77986.78  | 63141.64  | 60917.5   | 79092.38  | 69058.52  | 104988.4  | 72640.32  | 73457.7   | 41962.75  | 84846.66  |           |

|           |           |           |           |           |           |           |           |           |           |
|-----------|-----------|-----------|-----------|-----------|-----------|-----------|-----------|-----------|-----------|
| LP339.141 | LP339.141 | LP339.141 | LP339.142 | LP339.142 | LP339.141 | LP339.141 | LP339.141 | LP339.141 | LP339.141 |
| 59867.96  | 56847.65  | 65654.53  | 87263.9   | 66757.36  | 70652.38  | 65660.77  | 58059.02  | 67807.49  | 51479.82  |
| 60147.21  | 46337.04  | 77378.94  | 86845.64  | 101692.3  | 93669.44  | 70828.92  | 48162.22  | 55034.85  | 47737.2   |
| 57574.17  | 46657.38  | 59535.36  | 81380.18  | 62949.95  | 77500.52  | 61404.29  | 52150.52  | 51415.87  | 58571.69  |
| 57453.39  | 38216.36  | 70670.42  | 93325.53  | 74074.58  | 67165.09  | 63958.88  | 52838.7   | 53296.65  | 79150.76  |
| 75958.19  | 54734.73  | 79015.71  | 90876.14  | 74899.37  | 74754.76  | 56013.61  | 54585.36  | 56053.28  | 57472.38  |

|           |           |           |           |           |           |           |           |           |           |
|-----------|-----------|-----------|-----------|-----------|-----------|-----------|-----------|-----------|-----------|
| LP339.141 |
| 68935.78  | 35080.87  | 45279.81  | 37055.12  | 43830.88  | 37988.94  | 69142.17  | 33302.87  | 44174.49  | 50230.76  |
| 61177.75  | 45386.17  | 58007.92  | 34487.06  | 45722.49  | 38249.8   | 64096.74  | 48258.88  | 72743.46  | 59449.92  |
| 62306.88  | 35857.4   | 69461.52  | 42742.68  | 32736.37  | 25273.6   | 51913.65  | 48679.01  | 69926.72  | 53893.84  |
| 89989.12  | 30665.38  | 66174.35  | 26339.19  | 46529.75  | 29436.83  | 46173.99  | 27184.91  | 53503.27  | 54574.82  |
| 84643.46  | 43399.49  | 61212.72  | 27646.4   | 46439.85  | 24128.15  | 51195.2   | 28611.92  | 55480.83  | 52689.68  |

|           |           |           |           |           |           |           |           |           |           |
|-----------|-----------|-----------|-----------|-----------|-----------|-----------|-----------|-----------|-----------|
| LP339.141 | LP339.141 | LP339.141 | LP339.141 | LP339.142 | LP339.141 | LP339.179 | LP339.178 | LP339.178 | LP339.178 |
| 59173.88  | 66182.37  | 70450.97  | 44581.1   | 67853.15  | 49552.09  | 36648.13  | 45349.81  | 34746.74  | 54413.68  |
| 51221.57  | 68884.8   | 64290.49  | 54912.92  | 80408.94  | 43745.02  | 34380.32  | 41796.87  | 38465.03  | 91177.73  |
| 47584.8   | 69966.19  | 46789.55  | 46868.64  | 67898.4   | 58184.32  | 43923.13  | 43638.91  | 54192.68  | 68609.95  |
| 57933.61  | 66952.01  | 46102.84  | 40453.22  | 68135.85  | 53619.95  | 37593.43  | 37881.1   | 39427.69  | 55729.17  |
| 48208.88  | 72314.14  | 49733.99  | 68229.3   | 64079.78  | 36783.98  | 27577.66  | 43036.64  | 51498.21  | 72404.28  |

|           |           |           |           |           |           |           |           |           |           |           |
|-----------|-----------|-----------|-----------|-----------|-----------|-----------|-----------|-----------|-----------|-----------|
| LP339.178 | LP339.178 | LP339.178 | LP339.179 | LP339.179 | LP339.178 | LP339.179 | LP339.179 | LP339.179 | LP339.179 | LP339.179 |
| 39127.47  | 58468.88  | 40174.44  | 34906.6   | 65904.31  | 78885.21  | 67989.21  | 58073.66  | 36315.44  | 87197.86  |           |
| 36318.93  | 60435.48  | 43742.35  | 36269.99  | 65439.8   | 82835.51  | 70131.59  | 57770.78  | 39208.53  | 65287.94  |           |
| 36831.93  | 80194.97  | 45072.16  | 38208.37  | 45951.28  | 87160.65  | 77342.86  | 56144.27  | 34505.53  | 89770.79  |           |
| 41388.56  | 61576.96  | 40750.8   | 37249.03  | 100998.4  | 86021.73  | 73348.65  | 59070.94  | 39353.36  | 83904.53  |           |
| 35758.6   | 38493.82  | 50009.95  | 34559.34  | 68554.7   | 49217.47  | 65689.03  | 56513.94  | 38171.08  | 90959.36  |           |

|           |           |           |           |           |           |           |           |           |           |
|-----------|-----------|-----------|-----------|-----------|-----------|-----------|-----------|-----------|-----------|
| LP339.178 | LP339.178 | LP339.179 | LP339.179 | LP339.179 | LP339.179 | LP339.179 | LP339.178 | LP339.178 | LP339.178 |
| 57805.07  | 45346.05  | 33494.08  | 67431.63  | 85286.55  | 60726.57  | 69435.18  | 69179.77  | 64737.05  | 42255.96  |
| 60692.9   | 39781.68  | 31181.75  | 67541.57  | 90058.2   | 55294.65  | 66511.23  | 76093.24  | 67370.58  | 40865.87  |
| 58864.72  | 52510.71  | 31001.08  | 63507.66  | 86804.18  | 58991.28  | 63283.73  | 67142.61  | 67533.67  | 44554.77  |
| 57987.08  | 42654.85  | 28681.73  | 72593.23  | 81951.8   | 62153.71  | 59948.7   | 66687.57  | 69333.9   | 45490.67  |
| 57253.98  | 53917.52  | 30885.4   | 69524.27  | 80878.48  | 61676.82  | 66429.17  | 74249.4   | 66522.94  | 44661.19  |

|           |           |           |           |           |           |           |           |           |           |
|-----------|-----------|-----------|-----------|-----------|-----------|-----------|-----------|-----------|-----------|
| LP339.178 | LP339.179 | LP339.178 | LP339.178 | LP339.179 | LP339.178 | LP339.179 | LP339.179 | LP339.179 | LP339.178 |
| 46185.71  | 51945.8   | 56523.88  | 52375.02  | 23336.69  | 44766.28  | 69501.69  | 49693.34  | 73039.68  | 66709.66  |
| 49804.14  | 42934.72  | 55863.35  | 48110.59  | 26970.12  | 53241.28  | 65939.8   | 49640.26  | 72388.48  | 66356.86  |
| 42430.23  | 46824.25  | 55512.78  | 49271.61  | 26648.89  | 48437.67  | 80449.37  | 61356.8   | 73079.32  | 67736.62  |
| 45439.75  | 51747.03  | 60830.05  | 49290.96  | 26535.86  | 50486.92  | 62843.51  | 58151.19  | 72209.87  | 69744.05  |
| 50418.26  | 38063.3   | 50816.69  | 50652.15  | 25266.11  | 47352.78  | 66618.37  | 54230.75  | 70758.97  | 74158.79  |

|           |           |           |           |           |           |           |           |           |           |
|-----------|-----------|-----------|-----------|-----------|-----------|-----------|-----------|-----------|-----------|
| LP339.178 | LP339.179 | LP339.179 | LP339.179 | LP339.178 | LP339.178 | LP339.178 | LP339.179 | LP339.179 | LP339.178 |
| 61365.25  | 46920.23  | 69650.93  | 64095.73  | 75435.5   | 36322.17  | 59628.27  | 46108.22  | 91185.72  | 48006.45  |
| 61633.07  | 47107.86  | 60959.27  | 59994.97  | 69740.74  | 44072.6   | 58253.01  | 44959.33  | 83873.33  | 49739.09  |
| 68203.91  | 48599.55  | 60755.2   | 64525.86  | 74535.45  | 48220.93  | 58369.6   | 43189.05  | 79260.39  | 54949.73  |
| 60863.3   | 45353.58  | 64576.67  | 58894.38  | 78245.39  | 44086.69  | 59483.81  | 40601.05  | 77035.96  | 44520.54  |
| 58548.03  | 53209.3   | 59343.48  | 56812.51  | 73075.91  | 43843.06  | 55253.96  | 42221.83  | 76780.86  | 46284.74  |



|           |           |           |           |           |           |           |           |           |           |
|-----------|-----------|-----------|-----------|-----------|-----------|-----------|-----------|-----------|-----------|
| LP339.179 | LP339.179 | LP339.178 | LP339.179 | LP339.178 | LP339.179 | LP339.179 | LP339.178 | LP339.179 | LP339.179 |
| 53541.09  | 84743.83  | 39428.64  | 68101.52  | 52288.89  | 58381.72  | 75861.3   | 56078.44  | 42018.35  | 32005.9   |
| 52158.24  | 82240.34  | 42846.68  | 69776.01  | 49442.33  | 54909.37  | 73273.13  | 52234.1   | 46777.17  | 35632.86  |
| 52620.83  | 91633.07  | 43106.35  | 67325.68  | 47738.2   | 58563.12  | 69043.11  | 61658     | 49770.44  | 33240     |
| 51628.32  | 86307.1   | 44324.4   | 64437.74  | 48816.21  | 55325.1   | 75983.28  | 57822.3   | 45831.16  | 35965.75  |
| 50106.62  | 79109.08  | 41002.54  | 72126.47  | 48751.89  | 53352.6   | 78256.39  | 52997.79  | 44314.32  | 30426.72  |

|           |           |           |           |           |           |           |           |           |           |
|-----------|-----------|-----------|-----------|-----------|-----------|-----------|-----------|-----------|-----------|
| LP339.179 | LP339.178 | LP339.178 | LP339.178 | LP339.178 | LP339.179 | LP339.179 | LP339.178 | LP339.179 | LP339.178 |
| 75194.91  | 70098.51  | 52473.81  | 67184.77  | 53368.1   | 54517.56  | 55351.36  | 68980.36  | 42612.96  | 65259.01  |
| 73436.62  | 72404.84  | 50183.11  | 64865.02  | 54286.58  | 49003.73  | 50515.32  | 66849.7   | 42105.36  | 66877.84  |
| 75641.61  | 71702.64  | 52091.16  | 67501.24  | 57065.85  | 44528.97  | 55386.94  | 72449.91  | 42595.26  | 71227.28  |
| 76242.79  | 66381.54  | 51248.44  | 67110.34  | 50559.26  | 49603.95  | 57439.03  | 65425.38  | 44497.23  | 63242.63  |
| 73099.3   | 67662.25  | 41552.38  | 62897.26  | 54790.34  | 52562.93  | 56226.77  | 72463.72  | 39482.04  | 75904     |

|           |           |           |           |           |           |           |           |           |           |
|-----------|-----------|-----------|-----------|-----------|-----------|-----------|-----------|-----------|-----------|
| LP339.216 | LP339.215 | LP339.216 | LP339.215 | LP339.216 | LP339.216 | LP339.216 | LP339.216 | LP339.216 | LP339.216 |
| 48317.25  | 50601.6   | 44085.64  | 45701.08  | 46876.15  | 67154.31  | 57086.32  | 61652.6   | 60342.98  | 58011.22  |
| 48601.52  | 47191.76  | 48649.15  | 51819.19  | 37817.44  | 62428.98  | 52253.66  | 59570.14  | 59666.49  | 56266.38  |
| 46742.39  | 49950.54  | 53927.78  | 53016.86  | 41881.66  | 70187.19  | 52585.23  | 64827.28  | 62421.74  | 59293.83  |
| 48854.05  | 44754.92  | 45090.93  | 48727.36  | 39247.07  | 69309.23  | 54805.79  | 67839.75  | 59389.45  | 59096.43  |
| 52838.57  | 42486.61  | 47530.48  | 52583.19  | 45058.05  | 73404.46  | 51569.57  | 67890.49  | 63719.54  | 57031.28  |

|           |           |           |           |           |           |           |           |           |           |
|-----------|-----------|-----------|-----------|-----------|-----------|-----------|-----------|-----------|-----------|
| LP339.216 |
| 56266.99  | 46958.22  | 70157.21  | 58591.32  | 45377.17  | 68849.48  | 53434.31  | 53148.7   | 42277.17  | 49134.57  |
| 49958.09  | 52075.72  | 68785.95  | 63194.32  | 42353.02  | 66045.83  | 49569.99  | 51974.49  | 39624.67  | 57538.81  |
| 51684.79  | 48579.31  | 76020.53  | 64135.05  | 40923.37  | 62042.59  | 46532.56  | 53911.94  | 47150.99  | 55450.51  |
| 55298.8   | 46688.12  | 71960.68  | 54806.06  | 39698.6   | 61879.85  | 51289.52  | 49692.35  | 44947.05  | 52289.72  |
| 55957.71  | 52016.47  | 70756.02  | 56574.14  | 45474.43  | 58626.35  | 46567.19  | 56239.68  | 44917.22  | 52857.21  |

|           |           |           |           |           |           |           |           |           |           |
|-----------|-----------|-----------|-----------|-----------|-----------|-----------|-----------|-----------|-----------|
| LP339.216 | LP339.216 | LP339.216 | LP339.216 | LP339.216 | LP339.215 | LP339.216 | LP339.216 | LP339.215 | LP339.216 |
| 39369.21  | 35913.56  | 44501.33  | 61857.77  | 50666.12  | 51540.19  | 49752.91  | 84044.65  | 68705.68  | 59322.12  |
| 34495.86  | 35777.89  | 39581.19  | 57883.69  | 60955.78  | 48885.31  | 51002.26  | 85104.85  | 72084.98  | 64056.44  |
| 42667.42  | 35645.19  | 42642.13  | 55950.89  | 60160.41  | 51878.7   | 56218.35  | 90022.69  | 61341.08  | 63045.43  |
| 38937.8   | 35340.45  | 47247.05  | 57321.85  | 53929.21  | 50131.72  | 56763.29  | 82397.12  | 68108.66  | 60330.72  |
| 41318.09  | 34862.49  | 43509.3   | 55307.24  | 55915.34  | 49502.34  | 53540.97  | 94123.49  | 72085.33  | 58989.19  |

|           |           |           |           |           |           |           |           |           |           |
|-----------|-----------|-----------|-----------|-----------|-----------|-----------|-----------|-----------|-----------|
| LP339.216 | LP339.216 | LP339.236 | LP339.236 | LP339.236 | LP339.289 | LP339.289 | LP339.326 | LP339.326 | LP339.325 |
| 66443.75  | 56488.03  | 71101.03  | 69745.52  | 45757.28  | 103132.9  | 74009.26  | 117943.9  | 45439.39  | 52229.35  |
| 66745.97  | 53134.95  | 69728.39  | 66934.44  | 40993.75  | 104989    | 82194.18  | 177577.9  | 152097.1  | 103943.2  |
| 66909.87  | 59000.33  | 73468.02  | 67872.87  | 48248.37  | 101260.9  | 73724.04  | 103649    | 60711.99  | 56345.4   |
| 67713.89  | 59018.99  | 69251.09  | 69647.65  | 43138.48  | 96750.09  | 84045.72  | 203498.4  | 169293.4  | 118210.2  |
| 68729.81  | 57969.01  | 71772.29  | 68894.78  | 47091.74  | 101293.3  | 80491.94  | 227040.9  | 170630.6  | 125883.5  |

|           |           |           |           |           |           |           |           |           |           |           |
|-----------|-----------|-----------|-----------|-----------|-----------|-----------|-----------|-----------|-----------|-----------|
| LP339.326 |
| 97166.03  | 118932.5  | 66501.78  | 61357     | 31262.32  | 72601.14  | 40233.84  | 37804.9   | 47497.62  | 120084.9  |           |
| 180189.5  | 211361.6  | 156690.9  | 166092.3  | 86733.09  | 121432.5  | 116695.1  | 98453.18  | 77651.04  | 122651.3  |           |
| 86036.76  | 95809.14  | 62308.87  | 94897.87  | 73905.68  | 80779.68  | 43738.83  | 52744.24  | 42290.85  | 72326.36  |           |
| 200214.1  | 244881.4  | 178008.4  | 178375.4  | 96549.93  | 156578.6  | 135788.9  | 111152.2  | 98189.45  | 135006.9  |           |
| 210670.8  | 234480.5  | 191385.7  | 185364.7  | 95547.73  | 141366.6  | 126394.3  | 121483.1  | 95775.88  | 132416.3  |           |

|           |           |           |           |           |           |           |           |           |           |
|-----------|-----------|-----------|-----------|-----------|-----------|-----------|-----------|-----------|-----------|
| LP339.326 |
| 74514.3   | 46628.34  | 54980.85  | 47376.65  | 61433.23  | 53351.94  | 52752.27  | 66956.77  | 42228.4   | 62070.1   |
| 123927.3  | 115650.2  | 114467.5  | 68620.1   | 144300.8  | 147923.5  | 92526.47  | 146795.2  | 100037.1  | 149070.1  |
| 71046.09  | 45180.18  | 58679.23  | 37075.83  | 62329.42  | 77264.14  | 49527.76  | 80096.36  | 71931.56  | 97366.73  |
| 127120.4  | 141633    | 128237.6  | 73703.16  | 161107.1  | 160301.9  | 101769.9  | 170137.5  | 115146.6  | 154494.3  |
| 137779.2  | 127876.6  | 139672.7  | 67513.24  | 164420.4  | 171394    | 102647.8  | 173918    | 103492.4  | 152489.1  |



|           |           |           |           |           |           |           |           |           |           |
|-----------|-----------|-----------|-----------|-----------|-----------|-----------|-----------|-----------|-----------|
| LP339.326 | LP339.326 | LP339.326 | LP339.325 | LP339.326 | LP339.326 | LP339.326 | LP339.325 | LP339.326 | LP339.326 |
| 62259.74  | 49505.1   | 90582.81  | 55870.23  | 48271.41  | 59734.66  | 87139.45  | 39714.5   | 58839.63  | 46532.25  |
| 148855.8  | 126679.3  | 90096.97  | 125806.7  | 117769.6  | 118317.1  | 125913.1  | 94856.96  | 107382.6  | 101163.2  |
| 52315.38  | 60970.65  | 50758.03  | 54405.44  | 61345.38  | 59121.18  | 66268.92  | 52144.02  | 84918     | 48760.87  |
| 148599    | 138032    | 100461.8  | 129856.7  | 124580.7  | 136157.2  | 136161.4  | 104447    | 142981.1  | 116734.7  |
| 151755.9  | 138544.7  | 95677.9   | 128130.2  | 125552.1  | 140274.4  | 134110.8  | 91085.36  | 144842.4  | 118685.5  |

|           |           |           |           |           |           |           |           |           |           |
|-----------|-----------|-----------|-----------|-----------|-----------|-----------|-----------|-----------|-----------|
| LP339.325 | LP339.326 |
| 48266.19  | 46068.65  | 62876.94  | 104153.1  | 38480.25  | 69398.23  | 55069.6   | 57729.91  | 71232.43  | 55227.59  |
| 120041.1  | 105116.1  | 139254.8  | 114790.4  | 88468.53  | 166961.7  | 132147.5  | 123947.5  | 153791.7  | 116715.9  |
| 54405.14  | 59015.92  | 62913.82  | 64843.13  | 29705     | 61739.66  | 44550.67  | 58146.1   | 172112.2  | 66530.67  |
| 124696    | 107488.1  | 152761.8  | 139799.6  | 106711.1  | 190360.1  | 128095.7  | 143271.6  | 169660.4  | 128410.1  |
| 127758.4  | 115649    | 156783.1  | 136568.8  | 104347.8  | 209124.6  | 134817.1  | 129645.5  | 171548    | 132764.9  |

|           |           |           |           |           |           |           |           |           |           |
|-----------|-----------|-----------|-----------|-----------|-----------|-----------|-----------|-----------|-----------|
| LP339.325 | LP339.326 | LP339.325 | LP339.326 |
| 43098.25  | 48869.83  | 42112.79  | 57088.14  | 74596.77  | 43378.55  | 63631.01  | 144835.6  | 56835.67  | 484413.8  |
| 99123.43  | 143286.1  | 118795.1  | 129669.7  | 166180    | 126519.4  | 160121.4  | 133762.1  | 142071.3  | 519536.9  |
| 42626.5   | 144274.6  | 71270.21  | 70836.09  | 162702.7  | 46347.72  | 170766.4  | 80247.74  | 49677.3   | 102590.9  |
| 110380.6  | 156119.6  | 135251.4  | 141359.7  | 172944.3  | 136214.4  | 160592    | 157123.1  | 126440.3  | 554176.3  |
| 103642.2  | 159097.3  | 124979.2  | 145351.7  | 170243    | 124501.2  | 175592.5  | 159781.4  | 119299.8  | 525003.1  |

|           |           |           |           |           |           |           |           |           |           |
|-----------|-----------|-----------|-----------|-----------|-----------|-----------|-----------|-----------|-----------|
| LP339.345 |
| 1171003   | 956187.4  | 574377.9  | 127477.1  | 122230.9  | 181834.9  | 151289.2  | 107420.8  | 155764.1  | 138703.7  |
| 974611.9  | 585701.5  | 724001.9  | 127580.4  | 138442.8  | 185166.6  | 138748.4  | 151815.2  | 153554.1  | 151581.8  |
| 1422222   | 1241716   | 622345.3  | 133169.5  | 134088    | 177781.2  | 129976.8  | 104066.6  | 158581.2  | 135918    |
| 961903.4  | 937175    | 533357.1  | 97398.54  | 128904.9  | 173767.3  | 133697.4  | 107931.1  | 146439.9  | 195321.7  |
| 702934    | 748198.5  | 637743.8  | 110459.5  | 123504.5  | 165443.9  | 153118.9  | 111326.3  | 154946    | 138756.6  |

|           |           |           |           |           |           |           |           |           |           |
|-----------|-----------|-----------|-----------|-----------|-----------|-----------|-----------|-----------|-----------|
| LP339.345 | LP339.904 |
| 154117.5  | 141711.5  | 109010.1  | 173821.5  | 240875.4  | 170361.3  | 139630.1  | 184814.4  | 118302.1  | 26146.38  |
| 164196.3  | 164400.5  | 104771.2  | 176614.9  | 252571.8  | 247242.5  | 139434.5  | 175887.8  | 127756.7  | 26220.09  |
| 148138.9  | 135636.4  | 103956.8  | 172681.1  | 248768.6  | 157456    | 140570.6  | 181162.2  | 137399.5  | 33345.77  |
| 150794.8  | 146666.7  | 109095.8  | 144919.3  | 249669.5  | 166567.1  | 152038.8  | 184031.1  | 120776.3  | 35772.69  |
| 158220.8  | 138339.9  | 116070.2  | 152527    | 269836.9  | 149761    | 146854.3  | 177694.9  | 124862.2  | 26548.89  |

|           |           |           |           |           |           |           |           |           |           |
|-----------|-----------|-----------|-----------|-----------|-----------|-----------|-----------|-----------|-----------|
| LP339.904 | LP340.196 |
| 29426.72  | 82530.95  | 74100.06  | 70940.75  | 66390     | 75969.04  | 70849.56  | 89911.44  | 114423.1  | 48825.23  |
| 30718.13  | 89158.18  | 78415.6   | 65529.37  | 89072.02  | 69670.58  | 83716.21  | 94086.5   | 107801.6  | 55706.85  |
| 34352.41  | 91957.47  | 81721.13  | 57727.06  | 85273.34  | 68976.34  | 86614.02  | 93807.45  | 115381.4  | 47399.1   |
| 29896.46  | 122669.3  | 82142.53  | 63907.21  | 81015.85  | 69984.68  | 83820.3   | 94976.1   | 113236.6  | 50792.4   |
| 26835.53  | 88963.98  | 74787.95  | 57632.65  | 81857.68  | 72485.55  | 85706.46  | 86603.94  | 117443.3  | 46633.66  |

|           |           |           |           |           |           |           |           |           |           |
|-----------|-----------|-----------|-----------|-----------|-----------|-----------|-----------|-----------|-----------|
| LP340.196 |
| 78107.68  | 91190.47  | 65855.32  | 57114.73  | 61345.98  | 96039.02  | 81986.34  | 81441.82  | 62373.05  | 84713.5   |
| 82390.62  | 95363.81  | 76923.48  | 42491.37  | 63077.03  | 86164.78  | 65534.65  | 77516.51  | 71210.19  | 83640.93  |
| 81789.06  | 88262.69  | 66799.7   | 46324.27  | 68721.68  | 85683.64  | 70137.86  | 75870.74  | 55086.75  | 84401.68  |
| 88839.09  | 90748.53  | 64409.21  | 43768.52  | 63016.39  | 89954.03  | 77340.73  | 72673.97  | 61250.99  | 93120.21  |
| 91132.48  | 91658.18  | 73165.59  | 45476.31  | 66462.42  | 84401.59  | 71022.14  | 77382.87  | 54538.36  | 82384.66  |

|           |           |           |           |           |           |           |           |           |           |
|-----------|-----------|-----------|-----------|-----------|-----------|-----------|-----------|-----------|-----------|
| LP340.196 | LP340.261 | LP340.320 |
| 61439.89  | 70048.11  | 63231.71  | 70398.31  | 89253.67  | 65340.69  | 62443.49  | 63390.58  | 45122.48  | 27567.29  |
| 58358.92  | 61997.72  | 56171.32  | 66787.86  | 95337.34  | 57174.58  | 65757.35  | 73139.86  | 14973.74  | 32822.54  |
| 62377.79  | 66234.41  | 63857.51  | 68477.19  | 91846.78  | 50702.89  | 68240.3   | 67836.99  | 24278.44  | 37533.8   |
| 60849.79  | 68009.07  | 58338.49  | 73911.51  | 95096.23  | 54680.1   | 67218.97  | 71703.84  | 31726.09  | 40364.06  |
| 64250.59  | 68772.44  | 63095.22  | 72943.03  | 86773.02  | 56330.37  | 62569.13  | 68386.38  | 33218.17  | 41824.54  |



|            |            |            |            |            |           |            |            |            |            |
|------------|------------|------------|------------|------------|-----------|------------|------------|------------|------------|
| LP340.357' | LP340.357' | LP340.357' | LP340.357' | LP340.393' | LP341.157 | LP341.157' | LP341.157' | LP341.157' | LP341.157' |
| 126689.1   | 248137.8   | 11531.96   | 9988.598   | 120244.6   | 143570.5  | 166479.6   | 151445.1   | 155512.5   | 186728.8   |
| 135392.1   | 277538.5   | 17791.99   | 12696.02   | 134088.7   | 248116.6  | 200050.1   | 160008.9   | 164472.5   | 211176.5   |
| 162454.4   | 409327.4   | 19341.13   | 13149.33   | 199117.4   | 121833    | 113068     | 172768     | 259300.2   | 271831.3   |
| 174482.6   | 488480.4   | 16976.18   | 15015.31   | 241520.8   | 250723.6  | 155909.1   | 161200.8   | 193741.9   | 131263.9   |
| 182045.8   | 527536.7   | 22824.18   | 17192.42   | 260650.8   | 174023.2  | 172630.3   | 129363.3   | 140438.5   | 199605.6   |

|           |           |           |           |           |           |           |           |           |           |
|-----------|-----------|-----------|-----------|-----------|-----------|-----------|-----------|-----------|-----------|
| LP341.157 |
| 125552.9  | 161651.1  | 158286    | 169039.2  | 155538.6  | 143885    | 177059.5  | 127194    | 138184.9  | 138298    |
| 173853.5  | 201978.2  | 112877.6  | 165701.5  | 120150.4  | 198142.4  | 150926.4  | 235614    | 204739.4  | 163051.7  |
| 111045.9  | 122906.2  | 187327.9  | 208211    | 115786.6  | 126958.6  | 125230.9  | 147492.8  | 172360.3  | 112126.3  |
| 152782.8  | 245043.4  | 141967.3  | 248386.8  | 145280.1  | 155972.9  | 188950.8  | 148501.7  | 126626.4  | 110251.2  |
| 103270.6  | 140036.4  | 147201.7  | 165401.3  | 171497.6  | 225156.8  | 178870.9  | 174000.5  | 175358.8  | 161050.7  |

|           |           |           |           |           |           |           |           |           |           |
|-----------|-----------|-----------|-----------|-----------|-----------|-----------|-----------|-----------|-----------|
| LP341.157 |
| 138353.4  | 215592.2  | 136613    | 94714.33  | 115959.5  | 57869.28  | 66152.72  | 169290.8  | 175715.5  | 123962.5  |
| 122568.4  | 170546    | 120354.7  | 101738.2  | 109931.7  | 60937.12  | 63657.91  | 128512.4  | 180315.3  | 125292.9  |
| 144722    | 249838.5  | 199110.8  | 99530.13  | 82977.72  | 49417.63  | 88639.85  | 90235.25  | 160283.4  | 127210.2  |
| 110738.8  | 192218.1  | 94838.79  | 134526.8  | 119299.2  | 45025.32  | 70475.28  | 128438.5  | 182993.4  | 105258.7  |
| 116355.8  | 205237.3  | 110163.6  | 105260.8  | 119153.6  | 75955.01  | 80500.05  | 135127.1  | 169057    | 125921.1  |

|           |           |           |           |           |           |           |           |           |           |
|-----------|-----------|-----------|-----------|-----------|-----------|-----------|-----------|-----------|-----------|
| LP341.157 |
| 226091.9  | 193821.1  | 212186.5  | 141792.9  | 212662.5  | 145515.2  | 125942.3  | 119571.5  | 193253.6  | 187946    |
| 128063.6  | 173595.4  | 212177.9  | 222969    | 214728.5  | 175186.6  | 147951    | 139431.5  | 223580.9  | 224066.9  |
| 189146.1  | 120742.3  | 147280.3  | 124377.7  | 191854.3  | 139921.4  | 133916.4  | 158413.2  | 172721.9  | 289157.5  |
| 218423.5  | 241592.1  | 176316.7  | 165152.1  | 124898.1  | 132008.5  | 167384.5  | 117402.2  | 206923.8  | 178672.9  |
| 219913.6  | 270024.8  | 210242.4  | 171852.8  | 198542.6  | 181047.6  | 207067.6  | 121841.5  | 222739.9  | 148151.5  |

|            |            |            |            |            |            |            |            |            |            |
|------------|------------|------------|------------|------------|------------|------------|------------|------------|------------|
| LP341.157! |
| 247870.3   | 177201.1   | 142506.2   | 178551.8   | 136480.9   | 217760.1   | 167042.1   | 162101     | 137716.1   | 162266.4   |
| 171518.6   | 179114.6   | 133272.1   | 147302     | 196543     | 126938.8   | 183935.1   | 111452.4   | 113601.5   | 159161     |
| 167573.1   | 182436.2   | 111484.7   | 211167.3   | 158820.1   | 189939.4   | 119788.7   | 140392.4   | 155011.4   | 197230.9   |
| 223854.6   | 127523.5   | 143686.2   | 198519.6   | 203839.8   | 179390.4   | 140162     | 112977.6   | 137544.3   | 181563.8   |
| 165827.9   | 231277.2   | 106798.4   | 184142.1   | 147117     | 175734.8   | 160942     | 141748.2   | 170554.4   | 176581.9   |

|            |            |            |            |            |            |            |            |            |            |
|------------|------------|------------|------------|------------|------------|------------|------------|------------|------------|
| LP341.157! |
| 193111.7   | 139014.9   | 175128.5   | 172032.4   | 141356.7   | 208961.5   | 138184     | 173860.9   | 201883     | 172059.3   |
| 301582.6   | 179460.4   | 178713.6   | 191100.6   | 230704.7   | 179804.7   | 130658.3   | 174185.1   | 225238     | 233603.7   |
| 173485.2   | 151771.7   | 167969.3   | 182755.7   | 150970.4   | 167747.7   | 117100.5   | 143139.7   | 194256.7   | 227316.7   |
| 234871.5   | 161393.9   | 153042     | 124728.2   | 182594.4   | 172045.8   | 170790.2   | 116084.1   | 225308     | 202940.5   |
| 170067.5   | 168997.4   | 155570.9   | 135724.5   | 229215.9   | 154935.7   | 131299.7   | 191655.8   | 162026.9   | 159955.7   |

|           |           |           |           |           |           |           |           |           |           |
|-----------|-----------|-----------|-----------|-----------|-----------|-----------|-----------|-----------|-----------|
| LP341.157 |
| 143826.4  | 218993.6  | 143641.3  | 149137.9  | 112698.5  | 141118.7  | 198806.6  | 153704.9  | 187403.7  | 166250.5  |
| 146931.1  | 156458.3  | 215062.5  | 189523.9  | 118192.6  | 118298    | 143851.4  | 110411.2  | 172860.4  | 147180.3  |
| 166964    | 176618.4  | 164169.1  | 142952.7  | 108054.6  | 135217.3  | 168923.3  | 119340.3  | 188851.5  | 209835.3  |
| 143152.2  | 197093.4  | 126214.8  | 136925.6  | 161217.1  | 133442.9  | 171993.4  | 103359.1  | 258738.4  | 166171.8  |
| 131482.3  | 222621.8  | 102350.5  | 201848.9  | 156351.2  | 158265    | 179433    | 116910.9  | 184775.6  | 161435.5  |

|           |           |           |           |           |           |           |           |           |           |
|-----------|-----------|-----------|-----------|-----------|-----------|-----------|-----------|-----------|-----------|
| LP341.157 |
| 145711.3  | 122830.7  | 120274.8  | 112774.4  | 62797.35  | 151356.6  | 71638.66  | 145631    | 102280.7  | 71638.59  |
| 208571    | 107187.5  | 133625.4  | 132384.3  | 71959.75  | 188844.9  | 75626.75  | 153402.8  | 87575.94  | 72352.71  |
| 204895.6  | 124932    | 157843.7  | 109623    | 72079.91  | 133676.6  | 88647.37  | 160887.1  | 92052.67  | 101843.2  |
| 236635.6  | 131648.5  | 142661.1  | 152657.3  | 94806.69  | 230142.5  | 85690.97  | 197947.1  | 64671.54  | 49734.83  |
| 177985.2  | 190214.1  | 111597.7  | 166819.7  | 83902.7   | 130090.7  | 86968.66  | 208396.5  | 80320.93  | 90656.01  |



|           |           |           |           |           |           |           |           |           |           |
|-----------|-----------|-----------|-----------|-----------|-----------|-----------|-----------|-----------|-----------|
| LP341.157 | LP341.157 | LP341.157 | LP341.157 | LP341.157 | LP341.157 | LP341.158 | LP341.157 | LP341.157 | LP341.157 |
| 68053.86  | 68580.98  | 69830.17  | 66418.2   | 149477.1  | 91915.43  | 166900.1  | 187326.3  | 183725.5  | 139066.9  |
| 74638.25  | 73373.75  | 77503.19  | 69810.1   | 164370.6  | 94379.59  | 179996.6  | 198739.2  | 188713.4  | 134100.2  |
| 67040.17  | 73884.72  | 89220.66  | 63026.45  | 162205.4  | 107185.1  | 186289.8  | 174557.6  | 189841.9  | 129010    |
| 66749.54  | 82810.73  | 60611.32  | 77320.62  | 146509.1  | 109935.9  | 165539.6  | 186398.3  | 192203.5  | 135070.8  |
| 52872.68  | 78164.17  | 70071.92  | 64727.57  | 200716.7  | 82502.33  | 190266.2  | 184827.5  | 187486    | 131898.3  |

|           |           |           |           |           |           |           |           |           |           |
|-----------|-----------|-----------|-----------|-----------|-----------|-----------|-----------|-----------|-----------|
| LP341.158 | LP341.157 | LP341.195 | LP341.194 |
| 185492.8  | 106632.6  | 96819.38  | 117565.1  | 210223.3  | 64188.3   | 126698.2  | 68420.78  | 172639.5  | 114447.2  |
| 179401.5  | 99438.94  | 109023.1  | 109017.1  | 187167    | 63765.24  | 117832.9  | 68814.33  | 158788.2  | 102882.3  |
| 175218.4  | 108263.6  | 100669.2  | 116951    | 194817.1  | 60363.88  | 114738.6  | 58734.6   | 159590.7  | 106409.7  |
| 181854.6  | 108465.1  | 109879.6  | 112355.4  | 195933.4  | 58698.17  | 127064.6  | 62239.08  | 174532.1  | 102393.5  |
| 176607.7  | 105487.3  | 110278.8  | 115726.3  | 200632.4  | 61665.5   | 126619.8  | 63669.45  | 153676.4  | 114575.5  |

|           |           |           |           |           |           |           |           |           |           |
|-----------|-----------|-----------|-----------|-----------|-----------|-----------|-----------|-----------|-----------|
| LP341.195 | LP341.195 | LP341.195 | LP341.195 | LP341.194 | LP341.195 | LP341.195 | LP341.195 | LP341.232 | LP341.232 |
| 124284.7  | 106686.5  | 170470.1  | 149270    | 109327.9  | 142963.4  | 125058.5  | 158846.5  | 127329.1  | 175669.7  |
| 124815.2  | 96002.79  | 162129.3  | 146662    | 104765.9  | 154788    | 124527.2  | 152004.1  | 134462.6  | 164364.7  |
| 128869.2  | 107378.5  | 163330.9  | 153709.7  | 104468.1  | 144116.4  | 122654.5  | 162620    | 41887.26  | 171523.2  |
| 137536.7  | 59896.95  | 163748.3  | 140211.9  | 105123.8  | 150280.7  | 120450.6  | 173333.2  | 138253.3  | 179816.3  |
| 77965.46  | 106791.5  | 138590    | 149875.6  | 104084.4  | 148441.2  | 128285.3  | 172787.3  | 138761.4  | 186100.6  |

|           |           |           |           |           |           |           |           |           |           |
|-----------|-----------|-----------|-----------|-----------|-----------|-----------|-----------|-----------|-----------|
| LP341.236 | LP341.269 | LP341.304 | LP341.304 | LP341.305 | LP341.305 | LP341.305 | LP341.305 | LP341.305 | LP341.305 |
| 73824.04  | 795150.2  | 1514854   | 2272546   | 556303.2  | 467897.8  | 718453.9  | 210831.1  | 996640.6  | 716861.7  |
| 74104.81  | 799663.7  | 1297163   | 1503150   | 444677.2  | 439416.4  | 921251.6  | 245861.8  | 698767.1  | 539747    |
| 73104.98  | 905848.9  | 1054167   | 1579239   | 552612.7  | 462568.8  | 975690.8  | 312946.3  | 1068755   | 691765.6  |
| 54980.68  | 930201.1  | 1197479   | 2465599   | 442844.7  | 486999.8  | 1175394   | 361325.3  | 912356.4  | 705720.3  |
| 185456.7  | 943694.9  | 1887643   | 2178821   | 412613.7  | 327261.3  | 1101929   | 312642.5  | 1161925   | 561044.3  |

|           |           |           |           |           |           |           |           |           |           |           |
|-----------|-----------|-----------|-----------|-----------|-----------|-----------|-----------|-----------|-----------|-----------|
| LP341.305 | LP341.305 | LP341.304 | LP341.305 |
| 906813.2  | 179532.2  | 159270    | 1432116   | 361134.9  | 445131.2  | 1062854   | 346327.9  | 269205.3  | 326157.5  |           |
| 654739.2  | 173843.2  | 173192.1  | 838951.7  | 353522.1  | 461405.2  | 759859.4  | 271458.7  | 397024.3  | 297374.5  |           |
| 736662.4  | 185207.5  | 139819.6  | 846164    | 467056.5  | 575519    | 966450.9  | 365562.3  | 242546.1  | 354312.5  |           |
| 782537.9  | 202666    | 134810.7  | 633318.9  | 396068.4  | 508666.2  | 776146.6  | 486156.5  | 347728.7  | 276192.8  |           |
| 758877.6  | 149800.4  | 127839.8  | 849310.2  | 357627.8  | 537367.3  | 632202.5  | 449645.1  | 357090.2  | 254193.1  |           |

|           |           |           |           |           |           |           |           |           |           |           |
|-----------|-----------|-----------|-----------|-----------|-----------|-----------|-----------|-----------|-----------|-----------|
| LP341.305 | LP341.305 | LP341.304 | LP341.305 |
| 430150.7  | 446000.4  | 96065.89  | 411850.7  | 380280.9  | 191211.3  | 208966.8  | 321932    | 407028.6  | 347071.3  |           |
| 376553.4  | 345747.8  | 97999.58  | 425667    | 507866.8  | 196649.5  | 226935.8  | 387260    | 528201.5  | 351286.5  |           |
| 418434.6  | 333965.7  | 100689.6  | 403078.4  | 530729.9  | 162047.2  | 184682.5  | 501670.6  | 482584.8  | 336326.6  |           |
| 320924.4  | 353571.5  | 101271.6  | 382108.7  | 424485.5  | 191668.8  | 219596    | 409556.1  | 332144.2  | 344764.2  |           |
| 364570.8  | 331319.9  | 102476.3  | 394437.6  | 305408.2  | 179650.1  | 208858.2  | 249578.8  | 290453.2  | 434897.2  |           |

|           |           |           |           |           |           |           |           |           |           |
|-----------|-----------|-----------|-----------|-----------|-----------|-----------|-----------|-----------|-----------|
| LP341.305 |
| 174227.6  | 362092.1  | 338803.7  | 142988.9  | 346525.9  | 318957.3  | 407551.2  | 96662.13  | 234461.5  | 139550.1  |
| 193280    | 350447.7  | 356934    | 149587.8  | 342569.1  | 315173.9  | 385700.5  | 132478.1  | 225916.2  | 150075.9  |
| 169692.4  | 408321.6  | 347281.6  | 147682.1  | 360364.9  | 376435.8  | 405077.3  | 129838.3  | 214786    | 152891.3  |
| 176476    | 342128.5  | 338340.4  | 139797.6  | 350668.3  | 292937.3  | 378465.7  | 119428.3  | 242159.9  | 149462.8  |
| 168735.6  | 304411.4  | 320787.9  | 151920.4  | 343206.2  | 285825.3  | 390442.6  | 119495.9  | 167136.3  | 138883.2  |

|           |           |           |           |           |           |           |           |           |           |
|-----------|-----------|-----------|-----------|-----------|-----------|-----------|-----------|-----------|-----------|
| LP341.305 | LP341.351 | LP341.397 | LP342.191 |
| 127235.4  | 217939.6  | 107336.3  | 108229.2  | 115769.6  | 135975.1  | 123456.7  | 34614.09  | 45229.88  | 35872.41  |
| 126055.3  | 175513.3  | 103910    | 123712.3  | 123872.3  | 115950.4  | 111006.8  | 35394.63  | 49219.34  | 35920.39  |
| 136604.7  | 185528.9  | 114865    | 115665.7  | 117449.3  | 126812.4  | 114752.9  | 40176.19  | 59345.44  | 36916.79  |
| 129047.3  | 180553.2  | 101493.4  | 109703    | 110112.3  | 111745.3  | 105215.3  | 40573.02  | 62798.44  | 38272.34  |
| 112800.3  | 171008.4  | 104157.6  | 110062.9  | 114324.2  | 131515.6  | 103915.1  | 40522.95  | 65077.94  | 42085.33  |



|           |           |           |           |           |           |           |           |           |           |
|-----------|-----------|-----------|-----------|-----------|-----------|-----------|-----------|-----------|-----------|
| LP342.308 | LP342.308 | LP342.308 | LP342.337 | LP342.336 | LP342.373 | LP343.154 | LP343.155 | LP343.156 | LP343.156 |
| 435284    | 305346.8  | 133223    | 43826.45  | 82517.39  | 23124.22  | 171270    | 132276    | 136570.1  | 170913.3  |
| 291162.8  | 339305.5  | 138245.4  | 35281.48  | 86673.39  | 26398.74  | 177713.6  | 137089.7  | 142160.6  | 164783.6  |
| 310281.4  | 225882.1  | 141066    | 39900.78  | 94419.62  | 41936.97  | 167051.9  | 133471.4  | 140312.1  | 165822.8  |
| 361422.7  | 335417.4  | 120715.4  | 40355.92  | 78302.52  | 51955.63  | 163578.5  | 118819.4  | 130034.2  | 153192.7  |
| 429459.8  | 247250    | 131442.5  | 48371.51  | 82097.83  | 57300.19  | 157393.9  | 119907.7  | 141535.3  | 145997.4  |

|           |           |           |           |           |           |           |           |           |           |
|-----------|-----------|-----------|-----------|-----------|-----------|-----------|-----------|-----------|-----------|
| LP343.153 | LP343.153 | LP343.156 | LP343.153 | LP343.157 | LP343.156 | LP343.153 | LP343.172 | LP343.172 | LP343.172 |
| 118796.2  | 136372.5  | 106527.4  | 123796.8  | 110372.8  | 174072.6  | 126316.9  | 162113.3  | 56584.91  | 67564.15  |
| 119118.4  | 136415.4  | 97132.55  | 126997.9  | 106351.6  | 170262.1  | 135468.6  | 156500.5  | 58160.42  | 59434.96  |
| 109530.2  | 131842.3  | 99625.39  | 56329.86  | 100034.2  | 166291    | 125607.1  | 115677    | 55789.49  | 63298.33  |
| 113782.2  | 132015.6  | 108393.7  | 123745.7  | 108288.6  | 180916.6  | 117424.2  | 105997.2  | 47821.15  | 60747.44  |
| 116826.4  | 128389.7  | 104807.3  | 129183.5  | 108021.5  | 161413.1  | 125678.2  | 113173.6  | 49231.28  | 64326.75  |

|            |            |            |            |            |            |            |            |            |            |
|------------|------------|------------|------------|------------|------------|------------|------------|------------|------------|
| LP343.172! | LP343.173. |
| 134737.4   | 141057.7   | 146246.1   | 210741.3   | 104419.6   | 169833.7   | 135024.1   | 127539.7   | 144922.9   | 144635.7   |
| 100739.1   | 95737.52   | 118363.4   | 144263.3   | 106959.3   | 135263.1   | 139967.6   | 151344     | 205000.5   | 185782.6   |
| 127658.7   | 150623.1   | 103540.3   | 122006.1   | 137098.1   | 142701.5   | 128181     | 179796.8   | 212879.3   | 147181.9   |
| 163401     | 99823.85   | 130473.2   | 162496.2   | 149424.3   | 142917.4   | 120689.8   | 161674.5   | 195108.1   | 210264.9   |
| 196185.6   | 165708.2   | 121976.8   | 128562.3   | 105829     | 183717.8   | 137783.1   | 207262.1   | 219531.6   | 136864.6   |

|           |           |           |           |           |           |           |           |           |           |
|-----------|-----------|-----------|-----------|-----------|-----------|-----------|-----------|-----------|-----------|
| LP343.173 | LP343.172 | LP343.173 | LP343.172 | LP343.172 | LP343.173 | LP343.172 | LP343.172 | LP343.172 | LP343.172 |
| 174110.1  | 185882.8  | 145362.6  | 128421.8  | 82868.93  | 124621.4  | 107948.8  | 184853.6  | 128882.2  | 104469.2  |
| 148900.3  | 128835.1  | 153374.8  | 132779.6  | 99453.75  | 157176.4  | 181932.4  | 121739.8  | 156767.7  | 132922.7  |
| 190190.5  | 196781.6  | 178942.6  | 129238.1  | 138866    | 111853.6  | 143538.2  | 130425.8  | 134316.8  | 158509.2  |
| 136926.5  | 140172.6  | 168814.8  | 85201.66  | 150041.8  | 111079    | 128722.2  | 211797.5  | 102640.4  | 187321.7  |
| 150337.5  | 147540.4  | 174100.3  | 128888.5  | 131952.9  | 152953.6  | 139058.1  | 106819.3  | 154509.2  | 142809.7  |

|           |           |           |           |           |           |           |           |           |           |
|-----------|-----------|-----------|-----------|-----------|-----------|-----------|-----------|-----------|-----------|
| LP343.173 | LP343.172 | LP343.173 | LP343.172 | LP343.173 | LP343.173 | LP343.173 | LP343.173 | LP343.173 | LP343.172 |
| 159952.2  | 135215.1  | 146369.8  | 158586.8  | 161310.6  | 151221.8  | 173774.9  | 154943.4  | 163190    | 227734.4  |
| 217545.9  | 170376.9  | 119984.2  | 161417.5  | 150289.2  | 141302.5  | 176478.5  | 161435.7  | 171069.5  | 138590    |
| 177144.2  | 127144.7  | 195362.3  | 154108.1  | 165708    | 168027.5  | 147678.2  | 172498    | 129615.6  | 163307.5  |
| 145863.6  | 153134.3  | 143418.7  | 130391.5  | 224813.1  | 119569.4  | 177200.1  | 126201.5  | 150232.2  | 154714.8  |
| 180314.1  | 98435.54  | 98942.79  | 160680.1  | 131498.4  | 175276.2  | 144387.9  | 114788.6  | 141711.1  | 160557.1  |

|           |           |           |           |           |           |           |           |           |           |
|-----------|-----------|-----------|-----------|-----------|-----------|-----------|-----------|-----------|-----------|
| LP343.173 | LP343.172 | LP343.173 | LP343.173 | LP343.173 | LP343.173 | LP343.173 | LP343.173 | LP343.172 | LP343.173 |
| 116262.3  | 97948.86  | 123046.8  | 135306    | 142249.9  | 113841.9  | 154662.8  | 111657.8  | 113676.3  | 102044.3  |
| 137761.7  | 89320.31  | 196124.6  | 159690.6  | 175768.8  | 112033.5  | 137517.5  | 129364    | 106462.2  | 89357.57  |
| 157261.4  | 154625.1  | 177993.7  | 129991.1  | 126371.7  | 113028.5  | 147995.6  | 127462.4  | 120462.3  | 131497.9  |
| 202798.1  | 124089    | 142904.3  | 172032.4  | 134239.4  | 115110.6  | 213885.9  | 142594.5  | 117874    | 126082.1  |
| 132635.4  | 98267.93  | 147570.1  | 175769.1  | 146980.3  | 116091.6  | 122009    | 108792.5  | 110023.9  | 105904.5  |

|           |           |           |           |           |           |           |           |           |           |
|-----------|-----------|-----------|-----------|-----------|-----------|-----------|-----------|-----------|-----------|
| LP343.173 | LP343.173 | LP343.173 | LP343.173 | LP343.172 | LP343.173 | LP343.172 | LP343.173 | LP343.173 | LP343.173 |
| 97641.3   | 127856.5  | 195295.7  | 178407.6  | 154989.8  | 170663.6  | 113036.2  | 140879.8  | 146890.5  | 126478.7  |
| 124641    | 125925.3  | 171586.7  | 189174.1  | 132483.3  | 142139.9  | 123521.6  | 169170.7  | 93329.05  | 137619.1  |
| 88440.49  | 142516.4  | 164793.9  | 152840.1  | 119818.7  | 107410.7  | 113326.9  | 135882.9  | 108862.1  | 141626.9  |
| 128643.1  | 121420.7  | 146973.8  | 99921.2   | 122741    | 115782.6  | 113209.8  | 128743.8  | 124965.6  | 114977.5  |
| 103513.2  | 165633.4  | 189392.1  | 164058    | 119768.7  | 114643.3  | 95520.05  | 218088.3  | 108347.8  | 131908.3  |

|           |           |           |           |           |           |           |           |           |           |
|-----------|-----------|-----------|-----------|-----------|-----------|-----------|-----------|-----------|-----------|
| LP343.173 | LP343.172 | LP343.173 |
| 135668    | 106253.1  | 89791.1   | 118725.6  | 148526.8  | 103681    | 59877.49  | 148772.8  | 141673.6  | 108550.7  |
| 206878.5  | 83062.58  | 112839.7  | 104855.2  | 114737.5  | 136715.3  | 79147.26  | 93734.31  | 130325.5  | 103874.3  |
| 129528.8  | 109819.4  | 101973    | 151118.9  | 116274.3  | 130506.2  | 55467.83  | 88545.92  | 132502.7  | 136593.3  |
| 167362.6  | 107329.3  | 74334.33  | 148330.7  | 145955.1  | 111349.4  | 56625.29  | 79029.29  | 168408.8  | 100547    |
| 127530.2  | 104537.5  | 102167.9  | 126328.8  | 118691.6  | 110902.2  | 54227.53  | 118023.6  | 116273.3  | 127856.8  |



|           |           |           |           |           |           |           |           |           |           |           |
|-----------|-----------|-----------|-----------|-----------|-----------|-----------|-----------|-----------|-----------|-----------|
| LP343.173 |
| 117532.1  | 84217.63  | 64320.86  | 79393.53  | 81837.57  | 113473.4  | 54445.14  | 48978.85  | 66261.59  | 56511.16  |           |
| 98411.64  | 117750.1  | 71976.59  | 148899.7  | 53897.87  | 125196.6  | 59023.93  | 45682.7   | 98137.24  | 64963.32  |           |
| 87609.26  | 74714.72  | 73464.5   | 135962.7  | 51923.89  | 116135    | 55353.45  | 54093.38  | 66321.94  | 56967.39  |           |
| 75943.1   | 85584.43  | 78679.62  | 106578.7  | 58955.27  | 116212.2  | 59446.57  | 45126.1   | 50981.84  | 57829     |           |
| 117591.8  | 84869.4   | 72721.52  | 122718.8  | 62502.23  | 124096.5  | 56868.44  | 47160.39  | 93182.15  | 63574.17  |           |

|           |           |           |           |           |           |           |           |           |           |
|-----------|-----------|-----------|-----------|-----------|-----------|-----------|-----------|-----------|-----------|
| LP343.173 | LP343.311 | LP343.320 | LP343.321 |
| 55547.02  | 47114.51  | 50428.92  | 38133.17  | 122388.6  | 124238.7  | 50433.97  | 27584.19  | 44698.88  | 28157.38  |
| 77194.56  | 45571.64  | 50004.52  | 38118.44  | 138948.7  | 118025.5  | 45435.74  | 25289.13  | 45714.16  | 26467.53  |
| 51660.21  | 45989.76  | 57893.91  | 40855.75  | 134521.9  | 109958.1  | 44573.34  | 19141.01  | 53828.92  | 23370.5   |
| 42236.08  | 43079.21  | 42923.23  | 36237.25  | 102397.1  | 106834.4  | 41292.47  | 23234.77  | 60051.58  | 25354.18  |
| 45976.07  | 39749.79  | 43609.75  | 36901.25  | 117184.7  | 168673.6  | 50901.45  | 19850.16  | 71016.91  | 25604.3   |

|           |           |           |           |           |           |           |           |           |           |
|-----------|-----------|-----------|-----------|-----------|-----------|-----------|-----------|-----------|-----------|
| LP343.368 | LP344.207 | LP344.206 | LP344.242 | LP344.242 | LP344.243 | LP344.243 | LP344.243 | LP344.243 | LP344.243 |
| 7542.164  | 51073.74  | 58916.13  | 49905.94  | 32225.47  | 54915.53  | 36075.77  | 40964.39  | 56189.32  | 57804.04  |
| 8419.446  | 49927.18  | 61931.64  | 48536.23  | 31151.62  | 56910.28  | 38468.96  | 40766.32  | 53854.15  | 50568.23  |
| 13170.1   | 49954.65  | 57917.77  | 47922.87  | 36060.12  | 50918.09  | 46987.18  | 38824.72  | 53944.87  | 56061.86  |
| 15997.03  | 43307.08  | 57334.62  | 48315.79  | 33062.13  | 40837.74  | 36504.24  | 49725.16  | 54071.7   | 48739.42  |
| 17745.74  | 46193.08  | 61683.55  | 44733.04  | 39924.53  | 57021.38  | 30514.22  | 47730.88  | 54259.31  | 52068.8   |

|           |           |           |           |           |           |           |           |           |           |
|-----------|-----------|-----------|-----------|-----------|-----------|-----------|-----------|-----------|-----------|
| LP344.243 | LP344.242 | LP344.243 | LP344.243 |
| 40804.81  | 42740.1   | 42107.36  | 49621.45  | 45493.03  | 43148.99  | 42170.89  | 44057.27  | 45108.42  | 80908.27  |
| 45467.71  | 40666.87  | 45668.76  | 59072.18  | 46527.54  | 42374.75  | 41314.26  | 54619.59  | 41000.3   | 70752.21  |
| 46820.77  | 41483.99  | 44980.82  | 54169.51  | 45450.95  | 40665.96  | 45872.13  | 48397.03  | 39548.29  | 73309.59  |
| 43647.49  | 38792.95  | 47781.63  | 52368.99  | 44741.75  | 40495.19  | 42476.21  | 45649.82  | 38574.83  | 72816.24  |
| 40455.05  | 47912.1   | 46159.39  | 58463.92  | 47539.68  | 45493.26  | 43341.2   | 48211.03  | 45643.43  | 78625.43  |

|           |           |           |           |           |           |           |           |           |           |
|-----------|-----------|-----------|-----------|-----------|-----------|-----------|-----------|-----------|-----------|
| LP344.243 | LP344.243 | LP344.243 | LP344.316 | LP344.316 | LP344.316 | LP344.323 | LP345.152 | LP345.151 | LP345.152 |
| 37764.8   | 60940.17  | 68940.82  | 281553.3  | 319541.6  | 132202.9  | 32450.86  | 289008.4  | 386465    | 442049.6  |
| 35742.74  | 54808.69  | 62164.96  | 263021.1  | 303321.6  | 149351    | 29511.44  | 278722.7  | 408083.1  | 381976.1  |
| 40224.82  | 55335.37  | 66226.75  | 180091.8  | 283760    | 116905.8  | 34040.31  | 292597.7  | 347282    | 348987.3  |
| 32879.5   | 55206.13  | 66802.45  | 229982.9  | 294026.8  | 161724.4  | 32753.34  | 337702    | 311206.5  | 394744.5  |
| 44240.23  | 56718.54  | 63482.86  | 239007    | 247360.4  | 139554.5  | 34611.7   | 364855.4  | 391953.2  | 427857.7  |

|           |           |           |           |           |           |           |           |           |           |
|-----------|-----------|-----------|-----------|-----------|-----------|-----------|-----------|-----------|-----------|
| LP345.152 | LP345.152 | LP345.152 | LP345.152 | LP345.152 | LP345.151 | LP345.152 | LP345.152 | LP345.152 | LP345.152 |
| 339091.9  | 404236.4  | 402477.9  | 349945.7  | 429291    | 306912.2  | 390130.2  | 374575.5  | 446499.1  | 571476.3  |
| 307869.3  | 361625.4  | 374220    | 391238    | 269626.4  | 383968.6  | 316612.8  | 360683.6  | 370377.5  | 427375.6  |
| 234772.4  | 386670.4  | 293119.2  | 500700.5  | 308692.3  | 305265.7  | 307704.3  | 491510    | 379264.2  | 479417.6  |
| 301104.7  | 346188.5  | 292873.3  | 305646.1  | 380407.1  | 329424.3  | 317826.8  | 466765.8  | 285283.4  | 482468.6  |
| 327829.7  | 372910.2  | 375097.7  | 363567.5  | 343511.6  | 339719.9  | 278340.9  | 505349.5  | 368751.9  | 500057.8  |

|           |           |           |           |           |           |           |           |           |           |
|-----------|-----------|-----------|-----------|-----------|-----------|-----------|-----------|-----------|-----------|
| LP345.152 |
| 539617.4  | 303936    | 225891.6  | 466008.2  | 390821.7  | 311875.3  | 371069.2  | 383848.8  | 307854.8  | 346438    |
| 412661.6  | 418725.2  | 231090.8  | 383000.9  | 400933.4  | 302400.1  | 419955    | 446209.8  | 252648.3  | 365969.9  |
| 468618.8  | 258001.3  | 278003.1  | 358289.4  | 477610.1  | 279820    | 446548.4  | 482152.5  | 287034.4  | 305524.1  |
| 384796.5  | 533474    | 256840.5  | 325479.1  | 329493.8  | 287047.8  | 460956.6  | 317904.5  | 290864.7  | 273987.1  |
| 415848.3  | 465297.1  | 255551.4  | 380938.9  | 397308    | 386395.6  | 406649.7  | 438704    | 261581.2  | 356103.6  |

|           |           |           |           |           |           |           |           |           |           |
|-----------|-----------|-----------|-----------|-----------|-----------|-----------|-----------|-----------|-----------|
| LP345.152 |
| 240197.3  | 441238.9  | 267456.8  | 257756.1  | 282845.4  | 261633    | 197791.5  | 246746.7  | 232574.8  | 321072.6  |
| 349270.3  | 377133    | 357271.2  | 275821.1  | 217001.6  | 271503.7  | 193759.1  | 259388.4  | 221137.5  | 344436    |
| 267251.3  | 408806.2  | 240325.3  | 203179.3  | 249222    | 221243.2  | 166497.3  | 428214.6  | 200573.6  | 245894.4  |
| 299306.2  | 440436.6  | 398959.2  | 245771    | 249147.5  | 258777.5  | 164851.4  | 254980.6  | 175121.7  | 339220.7  |
| 289327.3  | 428876.5  | 275031.5  | 251104.5  | 247706.2  | 254482    | 187604.5  | 237235.1  | 207589.3  | 365322.1  |



|           |           |           |           |           |           |           |           |           |           |
|-----------|-----------|-----------|-----------|-----------|-----------|-----------|-----------|-----------|-----------|
| LP345.152 |
| 296877.7  | 169171.5  | 124519.3  | 140372.4  | 134959.2  | 112010.1  | 130175.6  | 170545.2  | 92696.24  | 153894.8  |
| 318495.5  | 170127.7  | 117803.8  | 132885.4  | 146616.1  | 116274.8  | 128440.6  | 176938.5  | 95655.44  | 149725    |
| 318279.5  | 167619.5  | 103179    | 125494.4  | 144022.9  | 127748.4  | 108409.7  | 151868.1  | 81590.35  | 156269.4  |
| 325027.1  | 160989    | 108474    | 118716.5  | 115304.6  | 103499.1  | 100408.3  | 146683.1  | 82813.17  | 120855.6  |
| 349643.6  | 181336.2  | 109400.1  | 121645.2  | 147444.5  | 117130.8  | 124966.2  | 170880    | 82829.84  | 147333    |

|           |           |           |           |           |           |           |           |           |           |
|-----------|-----------|-----------|-----------|-----------|-----------|-----------|-----------|-----------|-----------|
| LP345.152 |
| 121293.8  | 369542.1  | 293935.8  | 489613.6  | 380631.9  | 371167.5  | 445027.4  | 340028.6  | 543665.5  | 471206    |
| 119025.6  | 441583.3  | 375255.9  | 382295.1  | 362337.5  | 537800.8  | 352997.2  | 365393    | 437142.6  | 387210.6  |
| 114981.9  | 460881.3  | 340586    | 547855.7  | 392942.4  | 331552.5  | 410089.2  | 323435.5  | 600111.3  | 424835.8  |
| 114532.3  | 379884.3  | 385973.2  | 362559.4  | 436671.7  | 412926    | 362499.2  | 324840.8  | 347073.3  | 350643.9  |
| 118684.1  | 447402.1  | 361695.6  | 413332.4  | 521364.7  | 529657.4  | 586284.8  | 306768.3  | 395309.6  | 346290.4  |

|           |           |           |           |           |           |           |           |           |           |
|-----------|-----------|-----------|-----------|-----------|-----------|-----------|-----------|-----------|-----------|
| LP345.152 |
| 406149.4  | 372579.7  | 321817.5  | 332900.4  | 466844.8  | 494659.6  | 455068.5  | 270622.3  | 281285.9  | 485501.1  |
| 347842.1  | 406663.6  | 347555.1  | 383273.1  | 418945.6  | 421540.3  | 455783.6  | 223379.9  | 247151.5  | 437326.1  |
| 457296    | 348907.1  | 485314.2  | 325241.6  | 462317.8  | 438387.4  | 486705    | 207496.5  | 472113.2  | 464595.6  |
| 387136.8  | 539269.8  | 392202.3  | 364087    | 404833.9  | 340741    | 430796    | 266879.8  | 245052.9  | 463898.3  |
| 414130.2  | 314427.6  | 312820.3  | 385473.3  | 622531.2  | 565486.8  | 425032.5  | 287423.6  | 269024.9  | 436481.7  |

|           |           |           |           |           |           |           |           |           |           |
|-----------|-----------|-----------|-----------|-----------|-----------|-----------|-----------|-----------|-----------|
| LP345.152 |
| 409726.3  | 606920.8  | 285494.2  | 307656.5  | 247880.5  | 226203.8  | 339721.2  | 393815.7  | 450424.7  | 442992.2  |
| 422811.1  | 394966.7  | 278482.2  | 296650.6  | 280422.4  | 289356.5  | 508769.7  | 364014.5  | 390599.3  | 379611.8  |
| 341711.1  | 485823.7  | 247806.7  | 385844    | 363737.9  | 336179.2  | 438538.6  | 327773.1  | 414096    | 358317.5  |
| 424480.8  | 495055.7  | 240737.7  | 316400.9  | 331980.4  | 294470.6  | 500652.4  | 299866.8  | 515994    | 352636.5  |
| 367133.8  | 326203.8  | 304373.8  | 314272.1  | 306906.8  | 272657.6  | 311439.6  | 377219.1  | 400503.3  | 318523.9  |

|           |           |           |           |           |           |           |           |           |           |
|-----------|-----------|-----------|-----------|-----------|-----------|-----------|-----------|-----------|-----------|
| LP345.152 | LP345.153 | LP345.152 |
| 283716.4  | 166394    | 337997.7  | 415938.7  | 259176.9  | 186717.6  | 251691.6  | 250686.9  | 292613    | 183232    |
| 291119.3  | 170750.5  | 361916.2  | 375180.5  | 253259.7  | 181613    | 268740.4  | 254627.2  | 266685.8  | 191265.7  |
| 208079.9  | 180384.3  | 357164.8  | 410269.7  | 288297.8  | 174773.5  | 252636.6  | 252905.5  | 275974.9  | 185122.8  |
| 264644    | 145298.5  | 370072.4  | 418918.9  | 259358.6  | 186112.3  | 259249.5  | 270713.1  | 284439.9  | 184832.7  |
| 326893.4  | 162328.4  | 386643.7  | 416301.1  | 273845.3  | 179451.2  | 273196.7  | 272910.3  | 283362    | 186096.8  |

|           |           |           |           |           |           |           |           |           |           |
|-----------|-----------|-----------|-----------|-----------|-----------|-----------|-----------|-----------|-----------|
| LP345.153 | LP345.152 | LP345.190 | LP345.190 | LP345.190 | LP345.189 | LP345.190 | LP345.190 | LP345.190 | LP345.190 |
| 434409.4  | 248228.6  | 290037.7  | 422610    | 388749.3  | 291540.9  | 297036    | 314534.8  | 174290    | 491650.1  |
| 429739.4  | 273035.7  | 281344.6  | 412358.6  | 386109    | 266751.9  | 289179.3  | 318355.3  | 179398.1  | 488493.6  |
| 409673.1  | 231015.8  | 248038.4  | 379047.5  | 376220.5  | 261558.7  | 317474.2  | 279741.7  | 148631.1  | 480320.9  |
| 436408.5  | 235558.2  | 258319.1  | 387445    | 360227.9  | 289134.8  | 101604.7  | 268648    | 135383.6  | 162535.4  |
| 442840.1  | 251595.7  | 267002.8  | 362320.5  | 339931.2  | 280701.4  | 342726.7  | 274540.5  | 151961.6  | 517368.4  |

|           |           |           |           |           |           |           |           |           |           |
|-----------|-----------|-----------|-----------|-----------|-----------|-----------|-----------|-----------|-----------|
| LP345.190 | LP345.190 | LP345.190 | LP345.19_ | LP345.189 | LP345.190 | LP345.189 | LP345.190 | LP345.190 | LP345.190 |
| 101915.8  | 79423.11  | 464804.5  | 207424.7  | 363662.4  | 152453.6  | 381216.7  | 116058.6  | 388827.4  | 524017.3  |
| 108418.7  | 85164.01  | 429490.1  | 216525.8  | 389525.5  | 172077.6  | 394241.9  | 129830.2  | 406210.9  | 521785.9  |
| 82274.88  | 75107.04  | 423727.8  | 233098.8  | 392935.4  | 140658    | 402416    | 102815.6  | 420018.5  | 535738.2  |
| 81764.98  | 67194.67  | 424108.2  | 226941.5  | 370760.2  | 142082.5  | 129030.4  | 97529.51  | 400248.2  | 165594    |
| 91910.88  | 77226.32  | 417136.6  | 204147.2  | 371618.5  | 147644.2  | 434211.4  | 107398    | 424478.2  | 536783.7  |

|           |           |          |           |           |           |           |           |           |           |
|-----------|-----------|----------|-----------|-----------|-----------|-----------|-----------|-----------|-----------|
| LP345.190 | LP345.190 | LP345.19 | LP345.190 | LP345.189 | LP345.190 | LP345.190 | LP345.190 | LP345.190 | LP345.190 |
| 101320.5  | 324939.7  | 477370.5 | 217191.9  | 413429.2  | 207458    | 214359.5  | 263631.4  | 116756.6  | 291500.9  |
| 102461.1  | 310828.3  | 501499.5 | 237345.8  | 398970.5  | 205115    | 222610.8  | 271064.4  | 123649.4  | 281730.9  |
| 83632.2   | 283005.1  | 122170.3 | 197256.2  | 379940.1  | 194597    | 209017.1  | 223119.1  | 98898.59  | 286809    |
| 79652.07  | 288825.1  | 519744.9 | 199206.4  | 395806.9  | 184528.7  | 200784.3  | 246347.7  | 91931.71  | 101441.4  |
| 83757.47  | 297450.3  | 488606.1 | 226051.1  | 402265.8  | 198536.6  | 215401.4  | 253595.6  | 108421.6  | 286150.3  |



|           |           |           |           |           |           |           |           |           |           |
|-----------|-----------|-----------|-----------|-----------|-----------|-----------|-----------|-----------|-----------|
| LP345.300 | LP345.319 | LP345.319 | LP345.319 | LP346.155 | LP346.155 | LP346.155 | LP346.222 | LP346.222 | LP346.222 |
| 47323.72  | 34406.59  | 47455.67  | 29743.43  | 67187.68  | 68431.62  | 63775.77  | 70256.47  | 96872.56  | 58522.26  |
| 42864.8   | 27231.69  | 69942.62  | 27192.41  | 65862.79  | 67491.02  | 63404.81  | 102235    | 53933.39  | 56851.91  |
| 48179.03  | 40965.73  | 60466.81  | 20867.38  | 62824.74  | 65073.93  | 65202.68  | 94048.92  | 64439.07  | 60960.65  |
| 49108.02  | 25725.93  | 54475.84  | 21382.08  | 71292.78  | 70927.69  | 60766.69  | 101510.2  | 60944.72  | 58637.57  |
| 59896.6   | 27075.14  | 46149.49  | 24452.57  | 67747.3   | 69989.72  | 69007.4   | 105756.5  | 64302.71  | 62548.7   |

|           |           |           |           |           |           |           |           |           |           |
|-----------|-----------|-----------|-----------|-----------|-----------|-----------|-----------|-----------|-----------|
| LP346.222 |
| 76953.53  | 90065.68  | 95033.76  | 126832.6  | 60068.28  | 57288.14  | 96884.21  | 65391.54  | 82810.19  | 80515.61  |
| 70735.26  | 85438.8   | 72591.92  | 127488    | 63786.11  | 61738.6   | 99289.19  | 75222.11  | 82044.93  | 85187.46  |
| 78269.93  | 106926.8  | 78447.21  | 127223.1  | 60867.75  | 56483.19  | 103888.5  | 63482.55  | 82536.29  | 77005.72  |
| 70100.18  | 84363.54  | 70783.96  | 129369.1  | 62131.74  | 55671.15  | 95632.16  | 68583.51  | 86782.22  | 84722.3   |
| 92753.95  | 93816.63  | 73040.42  | 119822.8  | 58225.45  | 56842.33  | 92535.95  | 56480.09  | 77720.59  | 72818.81  |

|           |           |           |           |           |           |           |           |           |           |
|-----------|-----------|-----------|-----------|-----------|-----------|-----------|-----------|-----------|-----------|
| LP346.222 | LP346.222 | LP346.222 | LP346.222 | LP346.223 | LP346.222 | LP346.222 | LP346.223 | LP346.222 | LP346.222 |
| 71912.8   | 83284.51  | 89774.51  | 85718.71  | 72807.19  | 64652.44  | 80388.58  | 80872.93  | 84449.95  | 53764.02  |
| 62709.19  | 66796.79  | 57992.5   | 90850.89  | 76851.52  | 63899.82  | 60135     | 79022.86  | 90803.82  | 53269.31  |
| 69029.13  | 83340.02  | 87792.2   | 72471.05  | 80444.24  | 68195.63  | 69499.3   | 74366.87  | 85278.81  | 50990.94  |
| 74019.01  | 89485.07  | 89922.97  | 78276.19  | 77542.69  | 62319.85  | 62527.9   | 81940.63  | 86789.15  | 50361.1   |
| 68490.09  | 84481.41  | 80924.42  | 71142.29  | 75493.14  | 67466.78  | 63780.53  | 80921     | 84661.98  | 50087.79  |

|           |           |           |           |           |           |           |           |           |           |
|-----------|-----------|-----------|-----------|-----------|-----------|-----------|-----------|-----------|-----------|
| LP346.223 | LP346.222 | LP346.223 | LP346.223 | LP346.222 | LP346.223 | LP346.222 | LP346.223 | LP346.223 | LP346.222 |
| 52599     | 89206.32  | 85351.22  | 65417.37  | 73099.02  | 58893.99  | 55255.2   | 51814.94  | 59256.18  | 83095.78  |
| 53263.06  | 99420     | 93422.12  | 56330.68  | 77189.63  | 56921.49  | 52911.72  | 51346.93  | 63085.21  | 79127.21  |
| 50626.29  | 104303.3  | 99780.72  | 61644.42  | 68083.81  | 54263     | 47736.72  | 46977.78  | 55369.27  | 81701.96  |
| 49637.01  | 99585.53  | 96757.59  | 67232.96  | 74436.51  | 52042.59  | 56339.46  | 50053.03  | 62791.5   | 88075.82  |
| 56979.38  | 90100.23  | 88955.5   | 64281.9   | 74362.83  | 53149.68  | 48777.43  | 47777.1   | 60368.84  | 75649.19  |

|           |           |           |           |           |           |           |           |           |           |
|-----------|-----------|-----------|-----------|-----------|-----------|-----------|-----------|-----------|-----------|
| LP346.223 | LP346.223 | LP346.223 | LP346.223 | LP346.223 | LP346.222 | LP346.223 | LP346.222 | LP346.223 | LP346.223 |
| 73467.56  | 94150.45  | 76922.7   | 61484.54  | 60966.56  | 94579.06  | 60427.85  | 77393.85  | 54179.89  | 79981.1   |
| 67607.54  | 89537.35  | 76946.85  | 65288.61  | 67396.13  | 85828.4   | 61158.93  | 82843.55  | 57771     | 78624.44  |
| 75872.1   | 94653.92  | 77262.71  | 63917.8   | 61410.94  | 87951.69  | 64649.7   | 84944.99  | 52801.2   | 74510.02  |
| 72210.26  | 87399.56  | 75522.74  | 60412.01  | 63218.52  | 83036.83  | 57459.95  | 85116.34  | 56127.64  | 83691.97  |
| 78141.58  | 87118.97  | 69719.21  | 57732.23  | 57210.15  | 86075.58  | 64746.86  | 82671.27  | 48652.75  | 81847.55  |

|           |           |           |           |           |           |           |           |           |           |
|-----------|-----------|-----------|-----------|-----------|-----------|-----------|-----------|-----------|-----------|
| LP346.223 | LP346.223 | LP346.223 | LP346.222 | LP346.223 | LP346.222 | LP346.223 | LP346.223 | LP346.222 | LP346.258 |
| 69533.98  | 74581.29  | 63376.96  | 86528.63  | 96532.89  | 55642.75  | 68897.86  | 60691.29  | 62570.38  | 84461.7   |
| 58397.8   | 68863.7   | 58193.03  | 85189.06  | 98541.13  | 58458.57  | 71682.67  | 61400.28  | 51859.81  | 86868     |
| 64651.04  | 66349.6   | 61043.17  | 89482.16  | 96112.43  | 61485.14  | 76357.32  | 59940.12  | 58019.22  | 104813.2  |
| 66009.28  | 71612.28  | 58643.66  | 87288.08  | 102692.1  | 58766.83  | 64127     | 60846.01  | 56164.09  | 88925.33  |
| 67341.6   | 70460.45  | 55384.65  | 82057.09  | 97086.15  | 59313.12  | 68609.89  | 61706.78  | 56030.22  | 71293.13  |

|            |            |           |            |            |            |           |            |            |           |
|------------|------------|-----------|------------|------------|------------|-----------|------------|------------|-----------|
| LP346.258' | LP346.258' | LP346.259 | LP346.258' | LP346.258' | LP346.258' | LP346.259 | LP346.258' | LP346.258' | LP346.259 |
| 70893.35   | 80259.68   | 77737.5   | 92553.34   | 85426.91   | 99784.99   | 86788.93  | 84984.61   | 100958.6   | 80137.53  |
| 73525.22   | 73321.59   | 72088.93  | 91909.56   | 88653.79   | 100714.4   | 94190.36  | 94588.19   | 93529.43   | 76507.53  |
| 89867.18   | 87179.11   | 65250.37  | 99566.93   | 86721.43   | 89146.18   | 94881.13  | 93658.45   | 103056.7   | 87231.3   |
| 82128.06   | 98945.38   | 69564.18  | 89632.04   | 99589.37   | 89487.95   | 117829    | 100385.5   | 88252.35   | 74395.67  |
| 85094.88   | 94792.57   | 72775.93  | 82799.24   | 86267.01   | 123008.8   | 81637.28  | 87929.81   | 92843.06   | 80468.95  |

|           |           |           |           |           |           |           |           |           |           |
|-----------|-----------|-----------|-----------|-----------|-----------|-----------|-----------|-----------|-----------|
| LP346.259 | LP346.258 | LP346.258 | LP346.258 | LP346.258 | LP346.259 | LP346.258 | LP346.258 | LP346.259 | LP346.259 |
| 60126.85  | 105086.6  | 56541.07  | 83916.99  | 54786.51  | 60902.45  | 73075.76  | 94257.78  | 91784.81  | 76158.69  |
| 59136.68  | 68876.91  | 55131.01  | 85340.41  | 58622.37  | 60462.75  | 83295.06  | 87056.54  | 89045.64  | 75012.08  |
| 52523.35  | 78018.65  | 87065.34  | 67429.53  | 57618.9   | 87431.89  | 131342.2  | 83284.54  | 63012.18  | 74350.82  |
| 58436.84  | 103948.8  | 63180.1   | 87515.71  | 55325.33  | 56429.11  | 78362.3   | 104370    | 85566.91  | 55795.15  |
| 60899.89  | 63500.89  | 60179.71  | 77206.61  | 48899.37  | 55499.18  | 83365.68  | 87012.94  | 104194    | 72251.87  |



|           |           |           |           |           |           |           |           |           |           |
|-----------|-----------|-----------|-----------|-----------|-----------|-----------|-----------|-----------|-----------|
| LP346.258 | LP346.259 | LP346.258 | LP346.259 | LP346.259 | LP346.259 | LP346.258 | LP346.259 | LP346.259 | LP346.259 |
| 77997.5   | 80268.62  | 80743.92  | 110741.7  | 73507.58  | 78489     | 107530.6  | 75679.3   | 58076.8   | 73104.46  |
| 102473.5  | 85603.91  | 71886.61  | 104685.2  | 75632.41  | 81626.21  | 113554.7  | 75089.51  | 66830.14  | 75238.26  |
| 76658.19  | 82250.52  | 75982.71  | 117460.1  | 70810.34  | 99389.25  | 93681.5   | 83711.45  | 63126.09  | 82135.24  |
| 74285.97  | 75485.47  | 73942.64  | 114530    | 72405.43  | 82885.76  | 107997.2  | 70709.2   | 65396.33  | 78697.66  |
| 77544.67  | 72195.3   | 83544.94  | 110906.6  | 76253.72  | 81449.65  | 134803.2  | 57038.44  | 59252.07  | 77041.69  |

|           |           |           |           |           |           |           |           |           |           |
|-----------|-----------|-----------|-----------|-----------|-----------|-----------|-----------|-----------|-----------|
| LP346.259 | LP346.259 | LP346.259 | LP346.259 | LP346.259 | LP346.259 | LP346.258 | LP346.259 | LP346.259 | LP346.259 |
| 113470.3  | 70450.5   | 86026.09  | 102703.2  | 73560.53  | 75926.22  | 82784.59  | 69741.4   | 48883.16  | 56256.8   |
| 104206.9  | 67567.28  | 86908.65  | 90912.14  | 74482.42  | 63478.01  | 80624.11  | 62829.55  | 44837.76  | 55827.29  |
| 110888.9  | 71850.72  | 86340.6   | 89139.3   | 85037.38  | 88512.27  | 80748.74  | 69139.78  | 49342.06  | 61664.66  |
| 120603.1  | 70954.9   | 86893.69  | 84950.96  | 77473.75  | 76245.88  | 94869.04  | 77253.69  | 45366.51  | 60582.6   |
| 124285.5  | 72101.67  | 97381.14  | 80293.92  | 77900.43  | 75367.63  | 85779.64  | 70646.86  | 51329.75  | 54547.23  |

|            |            |           |            |            |           |           |            |            |           |
|------------|------------|-----------|------------|------------|-----------|-----------|------------|------------|-----------|
| LP346.258! | LP346.258! | LP346.259 | LP346.259! | LP346.258! | LP346.259 | LP346.259 | LP346.259! | LP346.258! | LP346.259 |
| 82521.17   | 66663.86   | 68976.65  | 93965.63   | 65623.9    | 83191.54  | 99177.73  | 110271.9   | 64596.6    | 84855.65  |
| 80425.95   | 61660.6    | 68730.57  | 100957.3   | 64231.46   | 81214.27  | 99841.68  | 120550.2   | 63627.54   | 96026.87  |
| 81527.82   | 67746.45   | 76186.69  | 102792     | 61888.89   | 82730.98  | 104448    | 124497.9   | 62256.52   | 94469.13  |
| 88190.94   | 69963.16   | 67892.47  | 106553.2   | 56035.93   | 82578.8   | 102014.4  | 118930.9   | 70019.76   | 97658.88  |
| 76802.09   | 63416.27   | 64324.82  | 94062.45   | 60991.91   | 82667.45  | 94518.74  | 126328.4   | 59493.45   | 90197.36  |

|           |           |           |           |           |           |           |           |           |           |
|-----------|-----------|-----------|-----------|-----------|-----------|-----------|-----------|-----------|-----------|
| LP346.259 | LP346.259 | LP346.980 | LP347.315 | LP348.238 | LP348.238 | LP348.238 | LP348.238 | LP348.238 | LP348.238 |
| 95955.26  | 62891.68  | 73958.38  | 66723.6   | 95752.86  | 97990.09  | 93344.77  | 79782.75  | 92964.93  | 113768.1  |
| 91806.86  | 60228.98  | 68317.22  | 66259.73  | 105453    | 100730.9  | 93089.64  | 99437.18  | 81461.09  | 94700.22  |
| 89537.78  | 60100.84  | 59533.57  | 45526.37  | 118527.9  | 121188.6  | 75898.96  | 100337.2  | 89506.94  | 117395.1  |
| 96360.38  | 54654.66  | 55380.65  | 77900.33  | 163762.4  | 100358.4  | 63530.47  | 96579.74  | 92528.79  | 127112.4  |
| 90410.36  | 59569.08  | 49446.98  | 71596.83  | 140968.2  | 97122.15  | 103159.2  | 96839.25  | 127484.6  | 108110.6  |

|           |           |           |           |           |           |           |           |           |           |
|-----------|-----------|-----------|-----------|-----------|-----------|-----------|-----------|-----------|-----------|
| LP348.238 |
| 97873.97  | 79799.79  | 98005.2   | 98987.05  | 97581.86  | 102036.2  | 121166.7  | 132429.2  | 82146.92  | 89496.89  |
| 73931     | 135584.9  | 89180.02  | 97762.56  | 72045.64  | 94685.65  | 110583.6  | 128440.3  | 84990.64  | 89473.91  |
| 72515.74  | 130257.1  | 90865.76  | 100117.8  | 104691    | 90163.22  | 113377.8  | 134961.4  | 88294.82  | 90834.41  |
| 69894.98  | 112491.9  | 103216.9  | 97498.65  | 87542.79  | 60433.78  | 105183    | 96136.44  | 77497.07  | 95297.04  |
| 66061.03  | 170155.7  | 103812.5  | 107119.8  | 104612.5  | 104734.2  | 87630.14  | 112663.3  | 84652.07  | 88485.07  |

|           |           |           |           |           |           |           |           |           |           |
|-----------|-----------|-----------|-----------|-----------|-----------|-----------|-----------|-----------|-----------|
| LP348.238 |
| 67151.14  | 84660.97  | 92049.63  | 86833.19  | 84366.34  | 89037.13  | 97941.28  | 95735.67  | 81695.02  | 87848.69  |
| 75527.37  | 83016.42  | 77848.73  | 81593.7   | 90762.34  | 101725.2  | 93307.61  | 63726.77  | 97845.15  | 85112.76  |
| 81133.82  | 85537.02  | 78570.12  | 84139.01  | 120398.8  | 109653.7  | 87274.57  | 94874.27  | 86651.06  | 95778.03  |
| 112637.5  | 82778.68  | 110155.7  | 78590.11  | 91043.52  | 115943.6  | 71525.5   | 101082.6  | 117020.9  | 92519.69  |
| 81174.28  | 73348.81  | 80272.6   | 86028.47  | 88875.87  | 152379.5  | 89622.71  | 83715.04  | 102419.4  | 99117.52  |

|           |           |           |           |           |           |           |           |           |           |
|-----------|-----------|-----------|-----------|-----------|-----------|-----------|-----------|-----------|-----------|
| LP348.238 |
| 85429.86  | 107471    | 133074.3  | 98591.72  | 78491.26  | 65857.75  | 102167.6  | 111444    | 106910.3  | 85764.22  |
| 83093.55  | 90316.14  | 134337    | 89670.86  | 81243.16  | 68093.09  | 94880.95  | 95550.5   | 108592.3  | 88466.02  |
| 97989.29  | 96689.4   | 104075.2  | 85140.62  | 85762.55  | 76442.36  | 89039.12  | 131478.7  | 115780    | 89014.68  |
| 91921.84  | 73523.5   | 108080.7  | 75113.12  | 84079.6   | 70616.23  | 120280.7  | 109752.9  | 124186    | 68083.8   |
| 91832     | 106861.6  | 161283.6  | 94125.78  | 91512.2   | 75832.27  | 91565.13  | 103416.8  | 83620.99  | 85033.19  |

|            |           |           |           |           |           |           |           |           |           |           |
|------------|-----------|-----------|-----------|-----------|-----------|-----------|-----------|-----------|-----------|-----------|
| LP348.237! | LP348.238 |
| 57739.98   | 106304.2  | 86060.9   | 142947.7  | 73664.56  | 148740.9  | 67590.34  | 85643     | 63565.08  | 89993.3   |           |
| 59501.44   | 102733.2  | 85958.51  | 156291.8  | 81389.9   | 105318.3  | 72110.76  | 88824.93  | 64095.45  | 91897.46  |           |
| 69462.68   | 94203.28  | 85251.26  | 142065.9  | 73245.23  | 162049.2  | 72700.3   | 86023.13  | 53977.85  | 111187.4  |           |
| 64412.08   | 109082.6  | 116916.6  | 93297.03  | 76812.12  | 151196.8  | 86476.57  | 90376.98  | 60150.47  | 91746.16  |           |
| 63185.88   | 106003.6  | 84146.95  | 104674.5  | 68829.07  | 104807    | 85739.39  | 102713.1  | 69346.25  | 98897.18  |           |



|           |           |           |           |           |           |           |           |           |           |
|-----------|-----------|-----------|-----------|-----------|-----------|-----------|-----------|-----------|-----------|
| LP348.238 |
| 115418    | 110282.2  | 81402.09  | 106933.3  | 74447.58  | 90137.43  | 95365.36  | 63149.8   | 105119.1  | 119287.2  |
| 128472.8  | 110958.9  | 66047.26  | 109144.9  | 72356.68  | 61183.68  | 101504    | 73545.11  | 98679.02  | 117082.7  |
| 118821.5  | 108819.9  | 83107.63  | 111533.1  | 70145.16  | 88525.34  | 101369.6  | 69413.95  | 92155.2   | 123864.7  |
| 121423.7  | 119037.6  | 75070.54  | 108288.3  | 114933.3  | 89927.01  | 89246.35  | 66707.53  | 101761.3  | 124094.8  |
| 128294.9  | 115503.7  | 81574.08  | 94836.16  | 79682.46  | 95875.92  | 99227.32  | 69015.09  | 118783.7  | 134423.9  |

|           |           |           |           |           |           |           |           |           |           |
|-----------|-----------|-----------|-----------|-----------|-----------|-----------|-----------|-----------|-----------|
| LP348.274 | LP348.274 | LP348.274 | LP348.274 | LP348.274 | LP348.311 | LP348.324 | LP348.326 | LP348.326 | LP348.325 |
| 65270.08  | 74941.46  | 92069.32  | 88014.26  | 90780.95  | 306355.4  | 69330.86  | 90089.61  | 72920.63  | 28262.72  |
| 60351.16  | 68350.64  | 91039.43  | 88552.98  | 86527.02  | 339533.5  | 65909.24  | 85013.45  | 74065.34  | 26128.62  |
| 38979.55  | 49810.09  | 65830.52  | 55632.75  | 67828.59  | 403011.2  | 69578.02  | 80881.35  | 71592.36  | 31548.29  |
| 67021.62  | 78909.14  | 91721.85  | 87930.36  | 99018.51  | 506375.6  | 67929.24  | 84708.88  | 75645.28  | 29217.25  |
| 69919.33  | 74779.23  | 95458.34  | 92820.94  | 91879.5   | 525510.9  | 58925.77  | 89222.57  | 69044.03  | 27148.31  |

|           |           |           |           |           |           |           |           |           |           |           |
|-----------|-----------|-----------|-----------|-----------|-----------|-----------|-----------|-----------|-----------|-----------|
| LP348.326 | LP349.272 | LP349.311 | LP349.310 | LP350.172 |
| 85247.37  | 18168.54  | 23203.77  | 33061.55  | 32421.33  | 38038.47  | 28390.29  | 33532.77  | 27677.34  | 20567.56  |           |
| 81503.04  | 17460.66  | 29945.72  | 33550.1   | 36445.03  | 42015.29  | 26573.43  | 35269.42  | 29007.67  | 19750.8   |           |
| 80814.56  | 17978.57  | 25351.37  | 35182.14  | 38919.65  | 37908.16  | 31683.05  | 37777.36  | 27470     | 23226.8   |           |
| 78676.77  | 16331.79  | 26008.66  | 36947.26  | 38321.83  | 44919.14  | 33572.79  | 30102.18  | 27693.99  | 18513.24  |           |
| 79545.72  | 16556.98  | 26148.11  | 34543.88  | 36172     | 38738.84  | 32220.2   | 29828.59  | 28297.26  | 20134.63  |           |

|           |           |           |           |           |           |           |           |           |           |
|-----------|-----------|-----------|-----------|-----------|-----------|-----------|-----------|-----------|-----------|
| LP350.217 |
| 54932.58  | 77667.82  | 60925.33  | 59641.34  | 45424.55  | 71200.56  | 88795.96  | 98025.27  | 72373.85  | 67771.01  |
| 55742.88  | 74908     | 65353.49  | 56555.3   | 44337.21  | 74283.96  | 91001.71  | 104020.5  | 71709.9   | 66290.91  |
| 50101.6   | 85333.38  | 59174.17  | 57684.2   | 47048.89  | 78811.55  | 91003.88  | 104199.4  | 79250.38  | 69509.21  |
| 49399.1   | 79261.14  | 55484.26  | 57126.91  | 53137.61  | 79092.48  | 98123.21  | 95043.39  | 67249.38  | 62581.69  |
| 48852.63  | 73433.7   | 64822.77  | 62280.72  | 46851.86  | 83898.63  | 94618.86  | 103490.4  | 66834.8   | 60296.12  |

|           |           |           |           |           |           |           |           |           |           |
|-----------|-----------|-----------|-----------|-----------|-----------|-----------|-----------|-----------|-----------|
| LP350.217 |
| 67139.56  | 109566.9  | 102616    | 81690.45  | 83573.64  | 58825.03  | 108568.2  | 72230.17  | 75821.33  | 85814.86  |
| 70972.7   | 105159    | 104596.2  | 84346.78  | 82640.99  | 52004.14  | 111743.7  | 70609.71  | 76359.05  | 90038.83  |
| 68591.5   | 99894.7   | 102683.9  | 81829.05  | 81718.48  | 55472     | 105209.4  | 68575.4   | 75453.87  | 98091.16  |
| 69014.29  | 99555.01  | 107882.6  | 89242.67  | 79090.79  | 53456.51  | 102688.7  | 71572.02  | 79893.17  | 92625.66  |
| 64397.23  | 95796.89  | 82334.56  | 95150.81  | 77717.56  | 56930.22  | 108680.7  | 74613.67  | 78587.31  | 94435.24  |

|           |           |           |           |           |           |           |           |           |           |
|-----------|-----------|-----------|-----------|-----------|-----------|-----------|-----------|-----------|-----------|
| LP350.253 | LP350.253 | LP350.254 | LP350.253 | LP350.254 | LP350.253 | LP350.254 | LP350.253 | LP350.254 | LP350.253 |
| 207255    | 139927.8  | 239688.2  | 265684.6  | 172837.2  | 111257.9  | 150691.8  | 166924.4  | 152025.7  | 215717    |
| 189803.3  | 154688    | 232270.6  | 255962.1  | 215375.6  | 113866.5  | 181618.8  | 191787.6  | 152192    | 141799.4  |
| 218315.6  | 159222.1  | 209840.1  | 181566.2  | 229463.6  | 117689    | 142858.8  | 174548.9  | 137962.3  | 153377.3  |
| 163126.3  | 150787.1  | 214982.4  | 227723.7  | 260083.4  | 105333.9  | 226623.9  | 154310.2  | 156887.9  | 174004.1  |
| 222341.8  | 182472.4  | 266617    | 219940.7  | 163441.2  | 142037    | 134081    | 162804.5  | 153025.9  | 142832.1  |

|           |           |           |           |           |           |           |           |           |           |
|-----------|-----------|-----------|-----------|-----------|-----------|-----------|-----------|-----------|-----------|
| LP350.254 |
| 165307.4  | 125860.2  | 145697.9  | 163163.7  | 207182.6  | 159073.8  | 167251.3  | 163783.7  | 185836.6  | 160461.9  |
| 208867.5  | 123666.5  | 223352.6  | 177513.5  | 191283.2  | 166419.6  | 154223.8  | 166668.2  | 179439.8  | 153480.6  |
| 206227.6  | 246217.6  | 215735.3  | 154455.8  | 204728.5  | 148971.3  | 147090.8  | 165064.9  | 188212.3  | 163795.8  |
| 209888.6  | 133733.6  | 216349.2  | 156287.4  | 185095.4  | 160542.1  | 155960.6  | 175718    | 179123.3  | 157594.9  |
| 177379.6  | 142019.4  | 203114.3  | 171745.7  | 202082.4  | 152913    | 153339    | 162647.3  | 173809    | 162341    |

|           |           |           |           |           |           |           |           |           |           |
|-----------|-----------|-----------|-----------|-----------|-----------|-----------|-----------|-----------|-----------|
| LP350.254 | LP350.254 | LP350.253 | LP350.254 |
| 167613.5  | 179429.4  | 119709.4  | 141785.3  | 149601.7  | 158053.3  | 108726.8  | 167983.2  | 169604.6  | 127409.3  |
| 155841.8  | 185386    | 104381    | 130408.3  | 231416.9  | 179374.9  | 104360    | 133239.2  | 162763.3  | 117384.2  |
| 175764.5  | 175921.8  | 114093.2  | 130461.2  | 217772.5  | 184248.7  | 109825.4  | 147021    | 191630.7  | 100709.6  |
| 188791.4  | 171378.8  | 104420    | 126497.9  | 215301.6  | 164476.7  | 115904.6  | 141047    | 155645.7  | 115870.5  |
| 178498.4  | 166539.1  | 116600    | 130759.3  | 232030.3  | 173532.3  | 119520.7  | 149247.1  | 159694.1  | 154290.5  |



|           |           |           |           |           |           |           |           |           |           |
|-----------|-----------|-----------|-----------|-----------|-----------|-----------|-----------|-----------|-----------|
| LP350.253 | LP350.254 |
| 179030.1  | 132683.4  | 162049.9  | 144059.2  | 110999.6  | 131881.4  | 145716.1  | 168703.2  | 163640.6  | 150950.3  |
| 173385.8  | 133512.8  | 157446.3  | 167574.3  | 102451.4  | 140674.7  | 145378.4  | 162180.7  | 174808.5  | 152426.1  |
| 177575.8  | 137051.9  | 155655.1  | 173776.9  | 121270.5  | 150076.8  | 148699.3  | 179056.1  | 165325.8  | 139440    |
| 190181.4  | 123266.3  | 170709.3  | 175459.8  | 111164.5  | 145670.4  | 142615.3  | 176763.1  | 152690.8  | 154372.5  |
| 168538.5  | 109654.5  | 153518.3  | 168425    | 111985.3  | 144508.6  | 128271.7  | 159667.2  | 169490.8  | 159108.7  |

|           |           |           |           |           |           |           |           |           |           |
|-----------|-----------|-----------|-----------|-----------|-----------|-----------|-----------|-----------|-----------|
| LP350.254 |
| 138655.8  | 84815.7   | 126244.3  | 213986.7  | 111230.2  | 161279.1  | 102191.1  | 128907.7  | 187890.8  | 91201.74  |
| 135524.8  | 90815.58  | 125526.9  | 206110.4  | 106277.3  | 225324.3  | 85102.41  | 86466.2   | 178305.1  | 92462.48  |
| 146258.9  | 83055.67  | 128872.4  | 207015.6  | 112539    | 215227.7  | 138828.6  | 105214.4  | 180945.5  | 89881.9   |
| 139700.9  | 96334.36  | 113869.8  | 192622.3  | 108213.8  | 230154.8  | 78613.89  | 95426.75  | 175169.5  | 103393    |
| 128010.2  | 86711.01  | 107764.4  | 211352.8  | 111629    | 220583.4  | 77642.15  | 98029.01  | 175246.4  | 85337.52  |

|           |           |           |           |           |           |           |           |           |           |
|-----------|-----------|-----------|-----------|-----------|-----------|-----------|-----------|-----------|-----------|
| LP350.254 | LP350.254 | LP350.254 | LP350.253 | LP350.254 | LP350.254 | LP350.254 | LP350.254 | LP350.253 | LP350.316 |
| 106800.3  | 155896.8  | 163295.2  | 263270.3  | 157371    | 73326.5   | 79751.43  | 216754.9  | 66281.63  | 156824    |
| 128474.1  | 148987    | 159073.3  | 256155.8  | 156928.7  | 73617.35  | 78352.08  | 215512.4  | 77540.7   | 155073.1  |
| 106868.2  | 143350.4  | 156700.8  | 250684.4  | 159419    | 78103.15  | 77491.29  | 208998.6  | 69626.63  | 152025.7  |
| 102792    | 151271.3  | 163253.1  | 244115.7  | 153930.5  | 78212.39  | 76239.78  | 218896.5  | 67572.63  | 148150.7  |
| 109565.1  | 145356.4  | 165208.6  | 242887.9  | 151216.2  | 73095.12  | 73171.54  | 222056    | 66008.44  | 139757.1  |

|           |           |           |           |           |           |           |           |           |           |
|-----------|-----------|-----------|-----------|-----------|-----------|-----------|-----------|-----------|-----------|
| LP350.326 | LP350.341 | LP350.342 | LP350.342 | LP350.342 | LP350.342 | LP350.342 | LP350.341 | LP350.341 | LP350.342 |
| 233293.7  | 263028.3  | 310165    | 227536    | 166831.5  | 147661.7  | 202162.8  | 140840    | 112975.5  | 158081.3  |
| 239752.8  | 289889.4  | 306078    | 176528.9  | 188466.2  | 127590.9  | 240459.4  | 131759.3  | 114039.1  | 152428.3  |
| 235885.5  | 297357.8  | 216461.9  | 186265.9  | 178472.5  | 136316.4  | 315843    | 142285.5  | 151919.5  | 152839.7  |
| 231660.8  | 278992.4  | 217159.1  | 205147.1  | 168824.6  | 137848.2  | 238507    | 137294.4  | 104504.3  | 145375.2  |
| 225072.4  | 293672    | 249000.3  | 187884.1  | 177935.6  | 145090.9  | 228792.4  | 128897.4  | 102024.2  | 143877.1  |

|           |           |           |           |           |           |           |           |           |           |
|-----------|-----------|-----------|-----------|-----------|-----------|-----------|-----------|-----------|-----------|
| LP350.341 | LP350.341 | LP350.341 | LP350.341 | LP350.341 | LP350.342 | LP350.342 | LP350.341 | LP350.341 | LP350.342 |
| 192436.6  | 107956.1  | 91485.32  | 179589    | 154333.1  | 145365.7  | 194134.1  | 181087.3  | 84386.72  | 188856.7  |
| 195778    | 98603.45  | 145853.2  | 143070.7  | 163431.7  | 137875.4  | 206001.4  | 185303.6  | 83604.06  | 173134.3  |
| 186129.7  | 94955.69  | 135613.9  | 177356.7  | 156198.6  | 142958.4  | 218700.9  | 181066.3  | 91727.64  | 188949.1  |
| 173566.2  | 95854.48  | 123930.9  | 182003.9  | 153697.4  | 169063.1  | 196420.3  | 181411    | 76047.32  | 186620    |
| 182775.3  | 99966.82  | 152565.3  | 166234.1  | 143690.3  | 150129    | 204499    | 174441.9  | 107502.7  | 166769.3  |

|           |           |           |           |           |           |           |           |           |           |
|-----------|-----------|-----------|-----------|-----------|-----------|-----------|-----------|-----------|-----------|
| LP350.342 | LP350.342 | LP350.341 | LP350.341 | LP350.342 | LP350.342 | LP350.341 | LP350.342 | LP350.342 | LP350.341 |
| 177964.9  | 184672.7  | 146127.2  | 155874.9  | 181727.5  | 160303.8  | 161857.5  | 158958.1  | 150099.8  | 141853.9  |
| 182880.8  | 191452.4  | 149819.5  | 145886.4  | 181741.2  | 179974.6  | 143801.7  | 161052.6  | 139619.8  | 158444.9  |
| 182651.8  | 177035.4  | 155942.8  | 147683.8  | 163660.5  | 176562.3  | 156598.9  | 151034.5  | 142427    | 138399.7  |
| 183229.7  | 173301.8  | 155253.2  | 149835.5  | 185308.6  | 160575.5  | 160263.7  | 147760.4  | 141314.3  | 140266.9  |
| 176061    | 180498    | 152222    | 168493.6  | 168337.5  | 179279.1  | 153225.3  | 134426.4  | 151895.2  | 159293.7  |

|           |           |           |           |           |           |           |           |           |          |
|-----------|-----------|-----------|-----------|-----------|-----------|-----------|-----------|-----------|----------|
| LP350.342 | LP350.342 | LP350.341 | LP350.342 | LP351.159 | LP351.253 | LP351.253 | LP351.253 | LP351.287 | LP351.29 |
| 166971.8  | 140712.1  | 146111.8  | 143147.5  | 26163.94  | 112897.2  | 37978.14  | 59446.86  | 63716.81  | 49223.31 |
| 170460.1  | 142406.5  | 171517.5  | 149216.9  | 31993.78  | 120417.2  | 41063.11  | 58649.88  | 53564.13  | 51613.87 |
| 173758.9  | 146727    | 143116.1  | 145848.7  | 31434.97  | 66125.86  | 24439.11  | 31973.79  | 59253.67  | 53996.51 |
| 160356.5  | 132276.5  | 142768.9  | 144959.9  | 30990.93  | 113175.4  | 44087.96  | 62003.26  | 62180.79  | 48976.96 |
| 163822.9  | 140259.8  | 151357.8  | 147955.6  | 28609.96  | 113484.5  | 32775.63  | 58846.68  | 50305.62  | 48217.61 |

|           |           |           |           |           |           |           |           |           |           |
|-----------|-----------|-----------|-----------|-----------|-----------|-----------|-----------|-----------|-----------|
| LP351.289 | LP351.289 | LP352.170 | LP352.184 | LP352.194 | LP352.196 | LP352.197 | LP352.197 | LP352.197 | LP352.196 |
| 71045.95  | 37424.6   | 154107    | 190330.2  | 301616.2  | 612449.7  | 901458.5  | 502366.3  | 879413.7  | 617025.3  |
| 72338.51  | 40912.36  | 148037.8  | 182383.1  | 241466    | 638134.1  | 848929.2  | 513205.8  | 789665    | 611642.1  |
| 67036.84  | 39734.25  | 145154.5  | 198226.5  | 264740.8  | 566634.5  | 808521.8  | 470654.8  | 718633.3  | 565934.1  |
| 65239.87  | 34436.82  | 141660.7  | 174654.2  | 274711.3  | 491828.4  | 817478.1  | 474959.2  | 774114.9  | 593216.4  |
| 75266.01  | 37450.52  | 119900.2  | 163689.8  | 244859.7  | 492525    | 754907.3  | 463561.4  | 786217.2  | 578026.2  |



|           |           |           |           |           |           |           |           |           |           |
|-----------|-----------|-----------|-----------|-----------|-----------|-----------|-----------|-----------|-----------|
| LP352.247 | LP352.248 |
| 606694    | 108314.9  | 932703.1  | 1160282   | 456076.3  | 788489    | 753712.1  | 477389.5  | 796393.1  | 818019.5  |
| 607238    | 125309.9  | 724334.5  | 1347075   | 797061.4  | 763815.5  | 656134.5  | 562838.7  | 657997.5  | 1140815   |
| 559375.4  | 147239.4  | 523678.9  | 1003910   | 659434    | 1286379   | 756147.9  | 484148.5  | 625850    | 1107872   |
| 631685.4  | 148531.8  | 770200.3  | 1318632   | 712885.2  | 627153.1  | 860178.9  | 650308.3  | 732454.1  | 913691.4  |
| 577701.8  | 140631.5  | 1038704   | 1067056   | 1039680   | 611204.2  | 833570.1  | 472558    | 842300.6  | 1167089   |

|           |           |           |           |           |           |           |           |           |           |
|-----------|-----------|-----------|-----------|-----------|-----------|-----------|-----------|-----------|-----------|
| LP352.248 |
| 451919.9  | 904310.1  | 807733    | 730149.3  | 819964.7  | 719009.3  | 458191.7  | 408036.6  | 816716.4  | 751246.3  |
| 662535.7  | 940677.2  | 1164545   | 1107759   | 838293.3  | 715359    | 536082.2  | 567920.1  | 1066063   | 1010725   |
| 528053.4  | 853695.9  | 649481.7  | 907965    | 1051876   | 976839.2  | 473017.8  | 359337    | 865722.6  | 1041091   |
| 535777.8  | 612094.3  | 652529.4  | 856965.3  | 841612.3  | 738074.6  | 495316.7  | 494451.8  | 972971.7  | 882928.2  |
| 513668.1  | 967622.9  | 627654.2  | 764327.6  | 704995.7  | 733625.7  | 441625    | 641319    | 923289    | 1362839   |

|           |           |           |           |           |           |           |           |           |           |
|-----------|-----------|-----------|-----------|-----------|-----------|-----------|-----------|-----------|-----------|
| LP352.248 |
| 827509.5  | 1122317   | 607054.4  | 432088.5  | 491542.9  | 505616.2  | 939884.2  | 814359    | 614594.2  | 692641    |
| 636793    | 882244.8  | 851064.9  | 508617.4  | 516441.9  | 453975.6  | 931032.4  | 634180.6  | 482029.4  | 883150.8  |
| 769284.1  | 1186131   | 835023.2  | 449988.2  | 443880.3  | 591280.3  | 1013798   | 620862.6  | 508925.3  | 593746.5  |
| 655505.7  | 846588.4  | 917313.1  | 565622.5  | 295118    | 420116.5  | 655001.1  | 573980.1  | 361103.6  | 855901.5  |
| 655309.7  | 1214364   | 927354    | 434107.9  | 463031.6  | 595778.4  | 919435.7  | 717015.3  | 442380.5  | 1188845   |

|           |           |           |           |           |           |           |           |           |           |
|-----------|-----------|-----------|-----------|-----------|-----------|-----------|-----------|-----------|-----------|
| LP352.248 |
| 361012.5  | 495103.6  | 508497.2  | 347952.4  | 831676.5  | 652972.9  | 818911.5  | 705870.7  | 673345.8  | 625444.8  |
| 391648.2  | 448141.9  | 830808.5  | 566845.2  | 505655.6  | 753946    | 1353082   | 710376    | 854640.9  | 692598.8  |
| 382484    | 375153.7  | 1353944   | 589192.5  | 561432.5  | 986534.7  | 704028.7  | 818951.6  | 900923.8  | 878411.1  |
| 430314.1  | 482493    | 923682.3  | 547955.1  | 574309.1  | 887702.2  | 671857.7  | 607130.1  | 836887.5  | 820332.4  |
| 358698.3  | 532941    | 805461.1  | 630005.4  | 467979.7  | 976120.4  | 1042581   | 681966.3  | 869647.4  | 668943.4  |

|           |           |           |           |           |           |           |           |           |           |
|-----------|-----------|-----------|-----------|-----------|-----------|-----------|-----------|-----------|-----------|
| LP352.248 |
| 464403.5  | 560609.5  | 688605    | 484870    | 884971.4  | 1091259   | 541462.8  | 627558.1  | 658873.8  | 684963    |
| 896100.2  | 569649.4  | 766549.5  | 501719    | 649319.4  | 913218.2  | 363203.2  | 385089.7  | 680158.4  | 610171    |
| 714311.8  | 722376.6  | 819659.4  | 474369.3  | 699615.8  | 889776.6  | 356079.2  | 414503.9  | 754372.7  | 646951.3  |
| 1036082   | 555505    | 784079.2  | 659313.8  | 629458.6  | 902815.2  | 440761    | 535741    | 748234.9  | 653681    |
| 629131.6  | 720050.7  | 817431.8  | 450033.9  | 649863.9  | 922728.3  | 457835.3  | 488668.2  | 777263.5  | 1083290   |

|           |           |           |           |           |           |           |           |           |           |
|-----------|-----------|-----------|-----------|-----------|-----------|-----------|-----------|-----------|-----------|
| LP352.248 |
| 417151.2  | 414851.7  | 864069.6  | 911448.4  | 801045.8  | 466280    | 867450.2  | 203800.2  | 198904.9  | 340283.2  |
| 440979.1  | 391792.7  | 737461.5  | 964315.4  | 915111.9  | 478614.8  | 610455.4  | 191633.2  | 222030.8  | 429385.9  |
| 404459.1  | 418294.2  | 735876.2  | 855559    | 1067317   | 388113.4  | 791279.7  | 200377    | 216477.8  | 373514.5  |
| 468212.5  | 448101.2  | 790430.6  | 772450.5  | 604389.6  | 546193.9  | 425893.6  | 198645.6  | 267852.2  | 445314.2  |
| 478189    | 455298.3  | 730364    | 743061.7  | 807313.5  | 541544.1  | 587836.2  | 214256.2  | 233557.2  | 508173.5  |

|           |           |           |           |           |           |           |           |           |           |
|-----------|-----------|-----------|-----------|-----------|-----------|-----------|-----------|-----------|-----------|
| LP352.248 |
| 503029.1  | 162819    | 601691.8  | 425684.2  | 512946.4  | 134154.3  | 172910.5  | 152368.2  | 153585.5  | 127617.2  |
| 482853.8  | 127758    | 609318.2  | 252118.8  | 340822.4  | 123265.2  | 176541.2  | 178832.5  | 155915.8  | 132456.2  |
| 690992.2  | 95365.39  | 591452.6  | 238310.8  | 722563.8  | 162989.1  | 174181.7  | 155172.8  | 160382    | 136593.4  |
| 470320.2  | 129112.6  | 596797.1  | 360407.8  | 562128.4  | 136271.9  | 177245.9  | 110283    | 107815.3  | 199714.9  |
| 476550.8  | 153137.6  | 781893.9  | 463137.1  | 589598    | 142165.3  | 170592.5  | 168971    | 101373.1  | 130920.4  |

|           |           |           |           |           |           |           |           |           |           |
|-----------|-----------|-----------|-----------|-----------|-----------|-----------|-----------|-----------|-----------|
| LP352.248 | LP352.248 | LP352.248 | LP352.248 | LP352.248 | LP352.248 | LP352.306 | LP352.321 | LP352.321 | LP352.321 |
| 194480.3  | 149255.3  | 241815.3  | 183944.1  | 172658.8  | 1068838   | 44560.45  | 54605.67  | 46355.51  | 57234.49  |
| 184423.9  | 151711.7  | 226826.1  | 171798.8  | 180355.5  | 991301.5  | 42974.31  | 55205.38  | 43696.91  | 54545.37  |
| 126071.4  | 144111.1  | 208538.2  | 151960.5  | 166901.5  | 647274.7  | 47005.54  | 56401.05  | 42836.82  | 52144.51  |
| 173383.7  | 102357.3  | 188841.9  | 150266.6  | 144993.4  | 920723.1  | 40179.36  | 49280.63  | 39089.31  | 55791.62  |
| 166907.4  | 137575.2  | 164353    | 139178.1  | 137818.5  | 1035969   | 41155.94  | 52962.85  | 37376.12  | 51528.76  |



|           |           |           |           |           |           |           |           |           |           |           |
|-----------|-----------|-----------|-----------|-----------|-----------|-----------|-----------|-----------|-----------|-----------|
| LP352.321 | LP352.320 | LP352.357 | LP352.357 |
| 44487.45  | 55520.43  | 51007.34  | 45321.77  | 54100.68  | 52117.12  | 34450.43  | 32039.45  | 93387.49  | 107736.7  |           |
| 45538.59  | 59690.81  | 56830.85  | 45710.4   | 64155.63  | 54917.41  | 36629.04  | 31876.7   | 70174.96  | 93542.59  |           |
| 46324     | 59398.15  | 52166.71  | 41271.58  | 54623.86  | 56368.69  | 35492.84  | 32593.73  | 86494.01  | 104540.2  |           |
| 47486.29  | 54673.72  | 56479.27  | 44422.95  | 52660.59  | 53340.92  | 37352.59  | 30407.92  | 75106.07  | 106092.2  |           |
| 46644.2   | 54751.26  | 53672.75  | 41574.21  | 61528.13  | 54420.56  | 34088.34  | 35081.74  | 88091.09  | 96716.84  |           |

|           |           |           |           |           |           |           |           |           |           |
|-----------|-----------|-----------|-----------|-----------|-----------|-----------|-----------|-----------|-----------|
| LP352.357 |
| 103401.2  | 92238.53  | 160157.4  | 100799.6  | 134464.2  | 86285.01  | 171525.5  | 108908.4  | 97438.93  | 70003.64  |
| 92691.71  | 89111.68  | 167211.6  | 98812.6   | 97503.42  | 79969.5   | 165820.2  | 104175.1  | 106855.7  | 65630.51  |
| 89088.32  | 87314.94  | 162457.1  | 95310.54  | 105993.7  | 81745.76  | 177332.1  | 101840.2  | 106841.9  | 63805.22  |
| 94798.43  | 78051.13  | 162160.5  | 100321.3  | 114912.7  | 88696.62  | 147723.7  | 99923.83  | 105984.7  | 75339.39  |
| 87559.05  | 90771.95  | 179298.6  | 94563     | 106590.2  | 85871.32  | 169823    | 97945.64  | 98485.82  | 65555.5   |

|           |           |           |           |           |           |           |           |           |           |
|-----------|-----------|-----------|-----------|-----------|-----------|-----------|-----------|-----------|-----------|
| LP352.357 |
| 23830.68  | 83922.08  | 129935.8  | 104934    | 388731.7  | 292951.8  | 293171.7  | 222569.3  | 178931.5  | 179284.3  |
| 21449.75  | 89413.43  | 125970.7  | 101564.4  | 228225.2  | 290072.3  | 300254.2  | 228874.2  | 185214.7  | 241484.7  |
| 19996.94  | 82387.04  | 130452.1  | 102940.1  | 504608.8  | 307445.5  | 371699.8  | 229151.4  | 181739.1  | 187165.3  |
| 20640.15  | 90140.53  | 123284.6  | 96552.13  | 215622.2  | 284676.8  | 301053.3  | 236113.7  | 191532.8  | 176828.5  |
| 23720.35  | 83095.26  | 133110.5  | 103570.3  | 353701.7  | 245267.2  | 286210.2  | 177493.3  | 189094.1  | 177443.3  |

|           |           |           |           |           |           |           |           |           |           |
|-----------|-----------|-----------|-----------|-----------|-----------|-----------|-----------|-----------|-----------|
| LP352.357 |
| 170119.1  | 96151.86  | 151017.7  | 140827.4  | 108392.3  | 147379.3  | 112651.4  | 162235.5  | 89933.95  | 73567.34  |
| 150211.2  | 113810.3  | 156707.1  | 136805.7  | 101777.4  | 141507.2  | 106417.1  | 166180.6  | 91558.13  | 68812.65  |
| 171003.8  | 100682.4  | 156171.6  | 134194.6  | 105833.5  | 144805.6  | 112078.3  | 150113.1  | 97796.4   | 74787.61  |
| 164449    | 109896    | 147850.1  | 126652.2  | 99061.25  | 134362.2  | 105655.7  | 165828.6  | 87902.64  | 72647.52  |
| 166942.5  | 109004    | 140204.8  | 129939.1  | 105369.5  | 145078    | 106689.2  | 169115.7  | 84371.43  | 69545.46  |

|            |            |            |           |           |            |           |            |            |            |
|------------|------------|------------|-----------|-----------|------------|-----------|------------|------------|------------|
| LP352.357! | LP352.357! | LP352.357! | LP352.358 | LP352.358 | LP352.357! | LP352.358 | LP352.357! | LP352.357! | LP352.357! |
| 158327.5   | 145268.2   | 176605.8   | 96523.28  | 132452.1  | 99393.98   | 191228.8  | 138612     | 81610.73   | 194963.2   |
| 175407.5   | 150486.9   | 186370     | 88029.37  | 137983.4  | 98841.75   | 186070.6  | 144051.6   | 82054.43   | 210101.2   |
| 158259.1   | 144195.5   | 174944.4   | 95826.84  | 126784.5  | 98683.12   | 184152.8  | 143345.9   | 78867.07   | 195622.2   |
| 155640.4   | 142608.6   | 177219.6   | 87328.47  | 132171.7  | 94500.1    | 183774.9  | 133592.6   | 82752.59   | 197211.3   |
| 157204.7   | 146188.3   | 168269.8   | 93929.47  | 121866.1  | 102708.1   | 199163    | 136773.3   | 84384.99   | 189548.3   |

|           |           |           |           |           |           |           |           |           |           |
|-----------|-----------|-----------|-----------|-----------|-----------|-----------|-----------|-----------|-----------|
| LP352.357 | LP353.157 |
| 80873.55  | 47342.32  | 66531.17  | 68875.97  | 64669.29  | 73209.81  | 58361.64  | 62797.86  | 90175.03  | 47862.44  |
| 88278.58  | 48225.23  | 59249.88  | 67577.54  | 67568.68  | 75183.07  | 47119.98  | 62921.4   | 79465.03  | 45673.66  |
| 87711.88  | 41884.64  | 64300.46  | 51308.38  | 74445.54  | 63466.74  | 53369.01  | 71269.64  | 55032.57  | 50987.12  |
| 84482.49  | 49577.88  | 68741     | 68993.8   | 65307.24  | 78114.89  | 50309.07  | 52437.46  | 96342.69  | 51837.53  |
| 78183.24  | 47761.66  | 61404.8   | 68465.29  | 66823.55  | 71668.82  | 48018.92  | 49631.19  | 84719.19  | 42782.75  |

|           |           |           |           |           |           |           |           |           |           |
|-----------|-----------|-----------|-----------|-----------|-----------|-----------|-----------|-----------|-----------|
| LP353.157 |
| 41245.61  | 65192.96  | 50233.55  | 86428.03  | 50502.45  | 34774.72  | 33013.03  | 56478.15  | 48149.42  | 56155.64  |
| 39623.53  | 67182.11  | 48769.08  | 85528.05  | 45849.12  | 34180.58  | 37416.4   | 57637.38  | 50727.02  | 57073.63  |
| 34515.74  | 42432.75  | 44749.8   | 65514.35  | 36295.32  | 28266.46  | 21983     | 53185.31  | 37347.2   | 55107.86  |
| 43048.55  | 77025.84  | 45010     | 84125.16  | 48101.51  | 34964.25  | 38822.19  | 63807.69  | 52976.89  | 56790.65  |
| 39216.66  | 70968.39  | 47185.95  | 90982.36  | 46769.42  | 31953.8   | 35522.16  | 52722.52  | 47386.34  | 49986.77  |

|           |           |           |           |           |           |           |           |           |           |
|-----------|-----------|-----------|-----------|-----------|-----------|-----------|-----------|-----------|-----------|
| LP353.157 | LP353.157 | LP353.157 | LP353.158 | LP353.157 | LP353.157 | LP353.157 | LP353.157 | LP353.157 | LP353.158 |
| 52970.48  | 43948.85  | 41919.38  | 47445.56  | 53371.44  | 48761.12  | 39335.12  | 45384.58  | 43606.33  | 39310.38  |
| 55832.27  | 44277.83  | 46898.08  | 48141.05  | 54692.44  | 43947.75  | 37746.29  | 47325.45  | 39914.75  | 40100.38  |
| 52965.71  | 36807.56  | 31052.7   | 41432.03  | 57279.25  | 33717.7   | 31965     | 47126.4   | 28488.15  | 28783.7   |
| 51701.95  | 45023.87  | 44635.82  | 44305.48  | 49808.73  | 48835.64  | 37762.93  | 46076.69  | 45399.7   | 41143.92  |
| 49645.43  | 41788     | 44432.09  | 43299.14  | 52262.77  | 45617.43  | 32249.58  | 38619.73  | 40651.26  | 37522.92  |



|           |           |           |           |           |           |           |           |           |           |
|-----------|-----------|-----------|-----------|-----------|-----------|-----------|-----------|-----------|-----------|
| LP353.157 | LP353.157 | LP353.158 | LP353.157 | LP353.157 | LP353.157 | LP353.157 | LP353.157 | LP353.158 | LP353.157 |
| 52140.1   | 45414.49  | 43455.93  | 52766.84  | 34196.8   | 63473.04  | 61505.67  | 47522.11  | 66097.78  | 58921.73  |
| 47964.97  | 46338.86  | 45906.85  | 44606.82  | 33945.02  | 62524.22  | 60437.52  | 42168.02  | 64378.55  | 54130.76  |
| 44688.14  | 42862.83  | 39150.23  | 51696.27  | 19462.02  | 66906.15  | 58316.24  | 47044.72  | 71804.41  | 60760.48  |
| 54960.48  | 44833.78  | 45143.35  | 53309.46  | 38073.07  | 61320.72  | 66288.88  | 41669.1   | 58968.28  | 51338.63  |
| 51696.68  | 45249.01  | 36665.19  | 49346.82  | 31264.03  | 59330.02  | 64203.15  | 44755.2   | 65218.93  | 55379.93  |

|           |           |           |           |           |           |           |           |           |           |
|-----------|-----------|-----------|-----------|-----------|-----------|-----------|-----------|-----------|-----------|
| LP353.157 | LP353.158 | LP353.158 | LP353.157 | LP353.158 | LP353.157 | LP353.157 | LP353.157 | LP353.158 | LP353.158 |
| 69243.28  | 68966.53  | 49376.12  | 57657.99  | 52179.56  | 58167.77  | 55089.91  | 34439.84  | 63468.26  | 66922.1   |
| 67482.63  | 66647.05  | 51584.98  | 46142     | 49366.47  | 65144.14  | 52493.81  | 34397.7   | 60770.04  | 67585.18  |
| 69993.79  | 65089.07  | 46872.39  | 52492.52  | 49577.13  | 55601.81  | 25747.25  | 38991.91  | 58483.1   | 52556.66  |
| 63172.97  | 59673.38  | 50680.76  | 52482.42  | 54566.96  | 59937.53  | 61889.65  | 34337.44  | 57089.21  | 69996.95  |
| 62347.17  | 63312.89  | 47750.52  | 56321.44  | 46094.6   | 60226.35  | 53845.53  | 33570.99  | 56246.37  | 69521.49  |

|            |           |           |           |           |           |           |           |            |           |
|------------|-----------|-----------|-----------|-----------|-----------|-----------|-----------|------------|-----------|
| LP353.157! | LP353.157 | LP353.157 | LP353.158 | LP353.157 | LP353.157 | LP353.157 | LP353.157 | LP353.157! | LP353.157 |
| 72547.73   | 48334.9   | 37164.21  | 63450.06  | 60217.44  | 82823.36  | 42226.21  | 44340.53  | 62967.47   | 74958.25  |
| 71718.01   | 43987.25  | 37539.16  | 63259.73  | 56168.27  | 89039.48  | 41415.84  | 42521.34  | 52589.58   | 73695.84  |
| 57210.78   | 35759.28  | 27756.7   | 57876.09  | 43420.46  | 95625.62  | 25127.85  | 37843.52  | 61192.68   | 66948.09  |
| 76301.04   | 45158.79  | 39456.34  | 68063.19  | 59356.45  | 78727.11  | 41516.41  | 43334.59  | 59879.14   | 75513.95  |
| 74150.51   | 43201.55  | 32431     | 61571.6   | 50498.69  | 80474.87  | 37729.83  | 38420.4   | 57437.08   | 69517.68  |

|            |            |            |            |           |            |            |            |            |            |
|------------|------------|------------|------------|-----------|------------|------------|------------|------------|------------|
| LP353.157! | LP353.157! | LP353.157! | LP353.157! | LP353.158 | LP353.157! | LP353.157! | LP353.157! | LP353.157! | LP353.157! |
| 57826.07   | 65846.52   | 65980.56   | 57800.2    | 77383.36  | 64496.82   | 41860.7    | 68678.87   | 48370.59   | 64528.57   |
| 63608.46   | 70172.24   | 69684.8    | 55010.43   | 70791.22  | 65121.01   | 38913.58   | 59735.02   | 45829.05   | 70258.55   |
| 68094.2    | 65846.46   | 68994.37   | 52704.74   | 61996.51  | 49358.37   | 36685.43   | 61750.97   | 42055.05   | 47396.95   |
| 62831.92   | 65379.3    | 61147.44   | 60770.83   | 70464.82  | 66386.62   | 46553.89   | 63716.71   | 47924.68   | 59937.17   |
| 56766.79   | 68341.49   | 62151.43   | 54566.69   | 71400.02  | 62948.78   | 39562.74   | 64208.22   | 47410.02   | 64020.44   |

|           |           |           |           |           |           |           |           |           |           |
|-----------|-----------|-----------|-----------|-----------|-----------|-----------|-----------|-----------|-----------|
| LP353.157 | LP353.158 |
| 64038.91  | 41453.93  | 71441.64  | 64085.11  | 73191.94  | 61443.13  | 67150.43  | 71692.97  | 51575.48  | 56290.2   |
| 66418.03  | 48176.01  | 65281.21  | 65033.27  | 77348.34  | 61864.87  | 65733.38  | 71849.57  | 51716.73  | 51441.15  |
| 61573.55  | 40653     | 35606.4   | 63271.73  | 55190.67  | 58315.33  | 47679.94  | 74498.49  | 53323.41  | 49200.22  |
| 66690.6   | 47588.43  | 74395.71  | 61392.8   | 73650.41  | 62968.83  | 69804.86  | 69085.65  | 56427.05  | 48494.16  |
| 63398.05  | 42473.1   | 68036.97  | 68925.35  | 80875.16  | 60741.34  | 67136.14  | 76092.59  | 48478.17  | 54041.76  |

|           |           |           |           |           |           |           |           |           |           |
|-----------|-----------|-----------|-----------|-----------|-----------|-----------|-----------|-----------|-----------|
| LP353.158 | LP353.157 | LP353.157 | LP353.157 | LP353.158 | LP353.157 | LP353.158 | LP353.157 | LP353.158 | LP353.158 |
| 50249.91  | 51650.43  | 53022.24  | 63017.82  | 36159.48  | 52289.06  | 62249.06  | 251330.7  | 49186.18  | 48245.75  |
| 45442.98  | 53563.76  | 58034.44  | 58691.34  | 36235.21  | 47045.25  | 60812.73  | 241671.3  | 53582.29  | 44269.74  |
| 43313.99  | 45141.75  | 59168.83  | 49385.04  | 28855.33  | 51585.08  | 60924.1   | 247970    | 52737.38  | 43560.5   |
| 47422.73  | 53175.08  | 58309.05  | 67148.37  | 32910.29  | 53109.67  | 58942.87  | 237334.1  | 49764.76  | 46175.03  |
| 50506.4   | 62191.05  | 51538.35  | 54720.83  | 33428.95  | 50549.96  | 60418.84  | 220621.3  | 47584.28  | 40869.31  |

|           |           |           |           |           |           |           |           |           |           |
|-----------|-----------|-----------|-----------|-----------|-----------|-----------|-----------|-----------|-----------|
| LP353.158 | LP353.158 | LP353.158 | LP353.157 | LP353.195 | LP353.194 | LP353.193 | LP353.194 | LP353.193 | LP353.194 |
| 29600.23  | 61189.92  | 58605.84  | 54136.3   | 295401.8  | 77077.96  | 90245.98  | 49593.85  | 55597.48  | 42246.91  |
| 29299.91  | 59563.25  | 66260.93  | 52013.17  | 283775.9  | 54469.6   | 96794.71  | 56930.33  | 46123.79  | 58474.98  |
| 29190.8   | 58091.4   | 68143.33  | 51739.16  | 319783.9  | 83724.31  | 96346.77  | 43702.07  | 50973.15  | 43111.33  |
| 32981.16  | 56092.28  | 59253.8   | 49611.19  | 266811.1  | 94062.14  | 92555.53  | 42871.65  | 70592.4   | 51726.27  |
| 28342.21  | 62213.84  | 70649.01  | 52673.17  | 270151.7  | 88489.09  | 74453.74  | 40476.11  | 55339.31  | 43306.67  |

|           |           |           |           |           |           |           |           |           |           |
|-----------|-----------|-----------|-----------|-----------|-----------|-----------|-----------|-----------|-----------|
| LP353.193 | LP353.194 | LP353.194 | LP353.193 |
| 59330.27  | 50773.48  | 56330.9   | 60622.85  | 60126.12  | 51539.09  | 54171.44  | 60185.17  | 59283.45  | 68112.2   |
| 52732.86  | 58879.07  | 54087.83  | 51695.49  | 62465.71  | 45273.4   | 68940.21  | 59978.42  | 41376.63  | 56158.68  |
| 55755.92  | 56175.03  | 47725.04  | 53949.34  | 55430.58  | 52479.98  | 57025.19  | 65194.19  | 62645.58  | 69904.88  |
| 69154.91  | 66713.01  | 70746.21  | 48300.27  | 49016.24  | 44081.06  | 73255.52  | 91638.08  | 56010.19  | 70138.5   |
| 67546.44  | 44045.4   | 48318.01  | 56935.56  | 54261.34  | 34536     | 68830.72  | 59015.63  | 54170.84  | 91665.94  |



|           |           |           |           |           |           |           |           |           |           |
|-----------|-----------|-----------|-----------|-----------|-----------|-----------|-----------|-----------|-----------|
| LP353.193 | LP353.193 | LP353.193 | LP353.194 | LP353.193 | LP353.193 | LP353.194 | LP353.193 | LP353.193 | LP353.194 |
| 62178.61  | 60223.98  | 54880.56  | 56507.75  | 64191.36  | 51124.74  | 52590.13  | 51266.31  | 68061.91  | 44985.88  |
| 83685.95  | 60597.33  | 67063.51  | 78252.6   | 56446.03  | 66485.04  | 39945.22  | 46789.67  | 56215.66  | 45826.52  |
| 68732.53  | 56964.63  | 44771.7   | 62466     | 73879.92  | 53177.2   | 50833.9   | 51937.34  | 72846.31  | 48809.09  |
| 40000.68  | 62762.62  | 51005.08  | 53658.43  | 77671.01  | 74602.24  | 49195.15  | 45436.69  | 63754.03  | 36044.1   |
| 67116.85  | 57509.98  | 38563.62  | 58495.65  | 60933.2   | 54169.63  | 62155.89  | 41501.93  | 66839.4   | 37300.3   |

|           |           |           |           |           |           |           |           |           |           |
|-----------|-----------|-----------|-----------|-----------|-----------|-----------|-----------|-----------|-----------|
| LP353.193 |
| 60416.37  | 46572.44  | 54983.74  | 66107.88  | 55338.28  | 52467.82  | 56330.86  | 64505.06  | 58638.96  | 58690.45  |
| 70395.84  | 49114.94  | 47702.59  | 53635.37  | 66331.12  | 47296.58  | 48216.35  | 48239.11  | 68253.79  | 58323.58  |
| 61601.01  | 46667.89  | 56986.36  | 65255.78  | 61717.28  | 62831.48  | 55426.84  | 57220.82  | 63133.25  | 59246.7   |
| 62773.52  | 54793.2   | 54078.57  | 63673.69  | 50098.4   | 59830.05  | 75512.91  | 58691.76  | 58492.48  | 51344.66  |
| 62515.87  | 34754.09  | 50905.23  | 51376.57  | 56548     | 49599     | 59920.98  | 65725.45  | 56150.33  | 59263.07  |

|           |           |           |           |           |           |           |           |           |           |
|-----------|-----------|-----------|-----------|-----------|-----------|-----------|-----------|-----------|-----------|
| LP353.193 |
| 57617.19  | 63070.42  | 71608.23  | 59772.59  | 64025.39  | 72103.73  | 56802.28  | 52804.1   | 66705.94  | 60568.83  |
| 56179.92  | 70711.71  | 43773.79  | 59563.24  | 49802.46  | 87037.85  | 57776.11  | 53194.64  | 58678.55  | 72293.62  |
| 56891.61  | 64522.58  | 78509.82  | 57211.11  | 67643.92  | 75926.04  | 53667.49  | 59904.87  | 64638.68  | 60655.75  |
| 54425.71  | 62807.98  | 65241.21  | 57883.67  | 50858.63  | 74239.87  | 55094.03  | 54444.94  | 61308.73  | 91688.96  |
| 86693.4   | 42476.55  | 72733.38  | 55450.56  | 70746.09  | 75712.09  | 47882.83  | 53271.67  | 50572.98  | 45171.2   |

|           |           |           |           |           |           |           |           |           |           |
|-----------|-----------|-----------|-----------|-----------|-----------|-----------|-----------|-----------|-----------|
| LP353.193 |
| 64003.77  | 55850.78  | 40678.99  | 58945.82  | 58761.68  | 60499.4   | 48706.66  | 57038.26  | 54625.06  | 56294.95  |
| 67292.37  | 42722.14  | 46241.09  | 59125.83  | 57484.1   | 68408.29  | 58603.64  | 37019.11  | 62468.65  | 46274.89  |
| 70858.88  | 54452.36  | 49690.31  | 61496.41  | 58760.36  | 60426.97  | 52115.22  | 54261.57  | 55557.88  | 54978.69  |
| 53241.86  | 46099.51  | 62064.01  | 57761.09  | 57705.57  | 62723.12  | 48124.31  | 60869.67  | 53943.01  | 40122.33  |
| 39594.67  | 58595.24  | 48185.21  | 85717.48  | 63342.72  | 58059.85  | 77176.04  | 56249.62  | 52079.12  | 48968.02  |

|           |           |           |           |           |           |           |           |           |           |           |
|-----------|-----------|-----------|-----------|-----------|-----------|-----------|-----------|-----------|-----------|-----------|
| LP353.194 | LP353.193 |
| 56168.84  | 51038.99  | 59968.32  | 56660.47  | 55971.95  | 53376.9   | 42347.42  | 44603.84  | 61595.88  | 37930.33  |           |
| 61498.47  | 63473.71  | 52837.01  | 39679.97  | 81502.98  | 45095.8   | 30435.88  | 58167.2   | 58375.01  | 63792.9   |           |
| 57050.47  | 46422.66  | 58819.18  | 62397.75  | 58321.3   | 59819.16  | 42474.75  | 47660.53  | 55806.3   | 39730.85  |           |
| 40363.57  | 46550.91  | 63880.23  | 62657.08  | 63043.92  | 53163.12  | 43555.34  | 45969.24  | 53830.19  | 39838.21  |           |
| 60798.82  | 49866.9   | 59560.04  | 66291.27  | 56199.6   | 67548.95  | 36439.24  | 61297.03  | 52009.48  | 40203.33  |           |

|           |           |           |           |           |           |           |           |           |           |
|-----------|-----------|-----------|-----------|-----------|-----------|-----------|-----------|-----------|-----------|
| LP353.193 |
| 52602.62  | 61106.25  | 59321.76  | 38570.1   | 63088.41  | 62172.1   | 47057.09  | 48200.64  | 63810.13  | 75115.59  |
| 48791.26  | 72871.57  | 43793.52  | 35201.1   | 59449.3   | 82022.38  | 53226.33  | 52141.25  | 57634.16  | 77214.04  |
| 54798.3   | 54045.54  | 63516.54  | 38627.34  | 57245.86  | 68384.56  | 43319.35  | 56437.4   | 68004.5   | 69385.66  |
| 63248.99  | 55598.2   | 57874.03  | 44723.27  | 53619.27  | 65373.1   | 46578.93  | 55199.06  | 63003.34  | 71377.61  |
| 46962.83  | 52835.46  | 60228.95  | 36500.39  | 69056.92  | 65818.95  | 52404.27  | 44901.69  | 55200.58  | 75555.56  |

|           |           |           |           |           |           |           |           |           |           |
|-----------|-----------|-----------|-----------|-----------|-----------|-----------|-----------|-----------|-----------|
| LP353.193 | LP353.193 | LP353.193 | LP353.193 | LP353.193 | LP353.193 | LP353.231 | LP353.252 | LP353.252 | LP353.251 |
| 70701.93  | 42644.79  | 52867.99  | 32709.86  | 80647.17  | 43748.54  | 47212.28  | 354692.5  | 484754.5  | 371211.4  |
| 72222.59  | 61685.14  | 48601.32  | 30575.56  | 71246.44  | 45244.57  | 47939.58  | 376659.7  | 562889.8  | 361421.6  |
| 67742.6   | 42815.97  | 55998.77  | 32357.99  | 81708.5   | 50102.2   | 51409.99  | 397473.2  | 560307    | 425109.7  |
| 63240.75  | 39504.51  | 49023.06  | 34103.13  | 78819.43  | 47508.49  | 45357.27  | 357926    | 529151.1  | 346152.6  |
| 72202.02  | 37084.59  | 50379.64  | 29070.9   | 73037.21  | 42371.28  | 44162.42  | 362997.4  | 490154.8  | 408465.2  |

|           |           |           |           |           |           |           |           |           |           |
|-----------|-----------|-----------|-----------|-----------|-----------|-----------|-----------|-----------|-----------|
| LP353.251 | LP353.252 | LP353.252 | LP353.251 | LP353.251 | LP353.252 | LP353.252 | LP353.252 | LP353.251 | LP353.251 |
| 468848.8  | 497235.6  | 626711.3  | 459165.4  | 286991.1  | 775849    | 305943.3  | 792013.5  | 350184.6  | 757134.7  |
| 493863.1  | 497903.3  | 621425.5  | 455455.9  | 285933.8  | 795159.9  | 285352.4  | 822472    | 333604    | 776242.9  |
| 526268.6  | 506386.6  | 612170.2  | 480812    | 256152.7  | 814371.9  | 256624.3  | 768256.9  | 365441.8  | 814600    |
| 471194.4  | 451913.3  | 598303    | 463468    | 271222.8  | 683280.5  | 274617.9  | 755559.4  | 305083.1  | 742906.4  |
| 509881.7  | 444707.3  | 615594.5  | 489758.3  | 274438.6  | 727134.7  | 254797.5  | 732208.1  | 347046.2  | 820126.3  |



|           |           |           |           |           |           |           |           |           |           |
|-----------|-----------|-----------|-----------|-----------|-----------|-----------|-----------|-----------|-----------|
| LP353.252 | LP353.252 | LP353.252 | LP353.251 | LP353.252 | LP353.252 | LP353.252 | LP353.252 | LP353.251 | LP353.252 |
| 198858.9  | 640483.1  | 711266.5  | 589239.8  | 597841.6  | 648962.4  | 478388.2  | 573550.8  | 504525.1  | 896581.8  |
| 198769.8  | 551722.1  | 712413.1  | 576883.3  | 556220.5  | 707978.4  | 501996.1  | 573367.8  | 507077.5  | 991657.2  |
| 190749.3  | 611442.6  | 683300.4  | 567283.6  | 541175.8  | 645426.1  | 468396.3  | 593075    | 544511.1  | 931078.6  |
| 178374.6  | 597396.8  | 668626    | 558620    | 564485.3  | 648602.8  | 448701.7  | 495705.1  | 535204.3  | 929399.8  |
| 189510.8  | 576278.5  | 631231.9  | 548000.9  | 553763.6  | 600672.1  | 443426.8  | 499883.8  | 518882.9  | 825899.2  |

|           |           |           |           |           |           |           |           |           |           |
|-----------|-----------|-----------|-----------|-----------|-----------|-----------|-----------|-----------|-----------|
| LP353.266 |
| 951157.6  | 407397    | 759061.4  | 635667    | 502021.3  | 981512    | 493184.9  | 326433.4  | 552874.6  | 619154.7  |
| 1348871   | 486387.5  | 805938.2  | 719916.1  | 299893    | 964742.3  | 533888.6  | 312409.2  | 424771.7  | 985026.6  |
| 1163907   | 518868.8  | 748176.9  | 791487.9  | 426474.5  | 725991.9  | 746983.1  | 433691.3  | 512871.6  | 652641.1  |
| 1030146   | 422267.7  | 607454.8  | 709223.9  | 384764.7  | 949807.2  | 562065.8  | 388782.5  | 410547.1  | 648101.5  |
| 1216535   | 320842.7  | 1003523   | 713825.5  | 425582.5  | 882090.7  | 588070.3  | 542333.2  | 627168.5  | 715243.3  |

|           |           |           |           |           |           |           |           |           |           |
|-----------|-----------|-----------|-----------|-----------|-----------|-----------|-----------|-----------|-----------|
| LP353.266 |
| 739239.1  | 552223.7  | 736955.1  | 507080    | 734049.3  | 903708.7  | 1177687   | 519945.8  | 731850.8  | 565024.5  |
| 449562.1  | 884317    | 627945.8  | 689831.4  | 725808.6  | 915047.9  | 983808.7  | 713387    | 712236.2  | 432401.7  |
| 760672.1  | 879207.3  | 480860.3  | 657469.8  | 681723.7  | 644553.6  | 1274173   | 422146    | 731299.1  | 690296.6  |
| 629212.2  | 622460.7  | 623215.8  | 483428    | 614098.3  | 668333.8  | 1383303   | 460356.6  | 658926.2  | 694334.6  |
| 546379.9  | 628504.8  | 766963.2  | 474046.7  | 694368.6  | 611784.5  | 913219.2  | 547745.4  | 640922.7  | 542537.3  |

|           |           |           |           |           |           |           |           |           |           |
|-----------|-----------|-----------|-----------|-----------|-----------|-----------|-----------|-----------|-----------|
| LP353.266 |
| 644998.8  | 537310.9  | 543990.6  | 252215.5  | 1231638   | 1270588   | 538633    | 1065151   | 574024.1  | 903148.7  |
| 1023409   | 449106.7  | 451783    | 259312.3  | 874197.5  | 1180095   | 320384    | 717049    | 699631    | 735591.4  |
| 796701.5  | 551467.9  | 423582.3  | 172012.5  | 1013593   | 1568319   | 449294.8  | 748222    | 780467.1  | 895958.8  |
| 758618.7  | 589866.4  | 636934.2  | 261590    | 885684.9  | 1266931   | 413343.6  | 744600.4  | 666227.2  | 975257.7  |
| 635828.3  | 492820.6  | 588514.6  | 177665.6  | 825101.9  | 1033258   | 423535.4  | 900464.4  | 696460.8  | 1031104   |

|           |           |           |           |           |           |           |           |           |           |
|-----------|-----------|-----------|-----------|-----------|-----------|-----------|-----------|-----------|-----------|
| LP353.266 |
| 678295    | 802881    | 1092785   | 527833.8  | 996392.8  | 856752.2  | 797576.1  | 603762.4  | 643522    | 474422.5  |
| 812395    | 957766    | 1014928   | 471158.1  | 608909.3  | 784336.7  | 664303.2  | 701164.4  | 883921.4  | 461138.3  |
| 608583.6  | 963549.5  | 1098584   | 393823.6  | 664492.5  | 680006.3  | 526129.7  | 865892.7  | 1040178   | 536923.3  |
| 791370.9  | 863603.6  | 883533.7  | 408664.3  | 635166.4  | 893157    | 628815    | 671092.8  | 686302.4  | 425303.3  |
| 970956.3  | 625725.4  | 1073681   | 488428.2  | 702623.1  | 507568.7  | 639574.9  | 640241.9  | 830574.5  | 563427.2  |

|           |           |           |           |           |           |           |           |           |           |
|-----------|-----------|-----------|-----------|-----------|-----------|-----------|-----------|-----------|-----------|
| LP353.266 |
| 849003    | 1292389   | 488232.1  | 499031.9  | 425782.8  | 943801.9  | 442596    | 464899.2  | 433857.8  | 884406.3  |
| 744787.1  | 1112744   | 320257.8  | 305246.6  | 694466.4  | 806565.6  | 603421.1  | 522582.1  | 517069.5  | 767735.2  |
| 508412.8  | 1178010   | 327479.2  | 570121    | 586249.7  | 758034.5  | 709837.1  | 402820.9  | 531136.7  | 664624.8  |
| 864632    | 1343525   | 327166.7  | 412830.7  | 489775.2  | 1005199   | 547462.2  | 408247.2  | 430847.9  | 799719.3  |
| 676266.7  | 987835.4  | 503554.8  | 523431.2  | 635083.2  | 1104694   | 494091.4  | 379879.1  | 451731.2  | 718140.9  |

|           |           |           |           |           |           |           |           |           |           |
|-----------|-----------|-----------|-----------|-----------|-----------|-----------|-----------|-----------|-----------|
| LP353.266 |
| 401695.4  | 404571.4  | 775876.8  | 794041.3  | 728950.2  | 778467.5  | 442962.7  | 589118.8  | 590026    | 346357.4  |
| 431858.8  | 439078.6  | 584782.3  | 942647.6  | 774122.5  | 896716.5  | 376741.1  | 726708.3  | 767173.9  | 345446    |
| 416574.7  | 552426.4  | 800826.1  | 935089.3  | 801663.3  | 1225191   | 433520.6  | 714348.8  | 573621.1  | 353008.8  |
| 459067.4  | 381625.4  | 527788.2  | 794625    | 736814.7  | 946240.4  | 463576.4  | 495224.9  | 459198.5  | 354405.7  |
| 530135.8  | 590772.4  | 571828.6  | 813717    | 899713.1  | 992811    | 513389.7  | 682938.6  | 492006.8  | 459011.6  |

|           |           |           |           |           |           |           |           |           |           |
|-----------|-----------|-----------|-----------|-----------|-----------|-----------|-----------|-----------|-----------|
| LP353.266 |
| 570001    | 377716.8  | 376792    | 461456.7  | 572387.8  | 576568.7  | 444153.4  | 339404.6  | 520653.9  | 510903.6  |
| 681908.7  | 466137.9  | 438941.7  | 424054.9  | 782304.9  | 604471.8  | 526920.9  | 409562.2  | 403575.6  | 412370.8  |
| 741139.7  | 505206    | 693043.7  | 590823.4  | 693584.2  | 601046.9  | 464595.7  | 341250.5  | 478192.1  | 595125.8  |
| 708992.6  | 450466.8  | 572251.4  | 433717    | 716173.1  | 761528.8  | 396360.5  | 482550.4  | 346657.6  | 445898.3  |
| 618996.7  | 492015.5  | 558539    | 540826.3  | 675972.3  | 655535.8  | 395577.6  | 514106.5  | 475157.9  | 409657.9  |



|           |           |           |           |           |           |           |           |           |           |
|-----------|-----------|-----------|-----------|-----------|-----------|-----------|-----------|-----------|-----------|
| LP353.266 |
| 246321.8  | 347427.4  | 739692.1  | 524983.5  | 584530.7  | 116946    | 126563.6  | 252384.5  | 221855.9  | 275955.2  |
| 285424.8  | 427304.9  | 772793.9  | 590879.2  | 856306.1  | 159269.3  | 192107.4  | 234061    | 226070.9  | 255074.9  |
| 185419.4  | 375848.7  | 852636.4  | 542757.5  | 677805    | 160775.5  | 189414.1  | 254796.6  | 213759.1  | 281990.9  |
| 153974.3  | 292539.2  | 876220.8  | 754570.2  | 504599    | 116568.2  | 137845.4  | 183841.3  | 207159    | 197421.7  |
| 206457.6  | 405792.4  | 661078.2  | 531532.1  | 963720.4  | 133052.8  | 155451.6  | 250072.8  | 226199.7  | 204193.6  |

|           |           |           |           |           |           |           |           |           |           |
|-----------|-----------|-----------|-----------|-----------|-----------|-----------|-----------|-----------|-----------|
| LP353.266 | LP353.266 | LP353.266 | LP353.266 | LP353.324 | LP353.324 | LP353.341 | LP353.341 | LP353.341 | LP353.341 |
| 425760.2  | 236619.8  | 152507.1  | 389147.3  | 27307.07  | 304237.2  | 338464.2  | 166190.2  | 1074412   | 432371.2  |
| 398750.6  | 156520.9  | 314801.6  | 309986.6  | 442994.5  | 297103    | 294434    | 194807.1  | 1066632   | 120374.3  |
| 442555.3  | 190741.4  | 193040.3  | 299737.7  | 399830.4  | 309136.3  | 299851.3  | 141478.6  | 1087911   | 445079.7  |
| 555918.6  | 153819.5  | 135799.4  | 290751.4  | 375465.1  | 261864.7  | 275103.9  | 479696.8  | 1051010   | 478866.3  |
| 461693.3  | 168029.7  | 205653.8  | 348159.1  | 388395.4  | 290201.2  | 310789.9  | 487991.8  | 1107862   | 94972     |

|           |           |           |           |           |           |           |           |           |           |
|-----------|-----------|-----------|-----------|-----------|-----------|-----------|-----------|-----------|-----------|
| LP353.341 | LP353.341 | LP353.341 | LP353.342 | LP353.341 | LP353.342 | LP353.341 | LP353.342 | LP353.341 | LP353.341 |
| 705410.6  | 88459.85  | 818486    | 872106.6  | 410961.6  | 786266    | 394591.5  | 966881.8  | 399816.8  | 507675.1  |
| 682393.2  | 418556.1  | 915145.4  | 843460.3  | 395972.4  | 699390.1  | 475033.8  | 1022754   | 408840.1  | 491772.9  |
| 156402.7  | 431056.9  | 831119.7  | 788143.6  | 131834.4  | 755474.5  | 426449.5  | 1080086   | 426016.7  | 501695.3  |
| 640469.8  | 428723.5  | 879163.3  | 751775.9  | 421687.2  | 758518.6  | 454666.5  | 1072095   | 432033.6  | 427215.1  |
| 681559    | 71689.87  | 926787.1  | 724843.8  | 462423.9  | 735768.3  | 436586.5  | 1066517   | 435355.5  | 493244.1  |

|           |           |           |           |           |           |           |           |           |           |
|-----------|-----------|-----------|-----------|-----------|-----------|-----------|-----------|-----------|-----------|
| LP353.341 | LP353.341 | LP353.341 | LP353.341 | LP353.361 | LP353.361 | LP353.360 | LP353.361 | LP353.361 | LP354.199 |
| 561133.1  | 1181657   | 956048.4  | 928094.7  | 38993.93  | 43721.19  | 41716.23  | 30976.64  | 51103.21  | 54561     |
| 603620.7  | 1315998   | 943592.5  | 937086.6  | 35620.45  | 38229.38  | 45325.35  | 33471.35  | 44879.65  | 50763.85  |
| 640946.7  | 1373897   | 1024111   | 906156.9  | 32925.94  | 40053.07  | 42220.42  | 29017.8   | 46518.95  | 54752.37  |
| 585322.5  | 1407867   | 1033971   | 943926.6  | 32321.24  | 33333.88  | 47959.18  | 33021.4   | 49699.32  | 30568.72  |
| 593149.6  | 1381452   | 1052715   | 905501.6  | 42198.47  | 49389.26  | 36418.32  | 34163.72  | 44407.42  | 50602.47  |

|           |           |           |           |           |           |           |           |           |           |
|-----------|-----------|-----------|-----------|-----------|-----------|-----------|-----------|-----------|-----------|
| LP354.198 | LP354.212 | LP354.211 | LP354.212 | LP354.212 | LP354.212 | LP354.212 | LP354.269 | LP354.269 | LP354.269 |
| 56091.54  | 107686.9  | 48902.09  | 65326.09  | 45734.99  | 55502.91  | 41178.28  | 181211    | 159814.6  | 214481.5  |
| 54620.55  | 68147.68  | 39368.5   | 54712.18  | 39060.06  | 57174.46  | 39593.61  | 208310.2  | 159099.4  | 272503.9  |
| 55974.4   | 64278.01  | 45350.72  | 60438.45  | 40876.07  | 57229.12  | 42999.37  | 137734.3  | 158114.3  | 209241.8  |
| 50948.25  | 75542.45  | 42225.17  | 60142.68  | 43853.32  | 57385.24  | 42335.14  | 151111.8  | 147437    | 195732.1  |
| 50723.91  | 62215.97  | 39368.53  | 55320.79  | 44159.2   | 51154.23  | 40140.24  | 154864.4  | 147822.3  | 175755    |

|           |           |           |           |           |           |           |           |           |           |
|-----------|-----------|-----------|-----------|-----------|-----------|-----------|-----------|-----------|-----------|
| LP354.270 | LP354.270 | LP354.269 | LP354.270 | LP354.27_ | LP354.269 | LP354.27_ | LP354.27_ | LP354.269 | LP354.269 |
| 193493.5  | 228317.9  | 194056.5  | 146561    | 127435.5  | 207029.9  | 140328.9  | 106613.2  | 117169.4  | 106893.3  |
| 245436.7  | 200208.8  | 231153.1  | 163079.6  | 109435.3  | 254599.5  | 161442    | 108128    | 126839.4  | 146716    |
| 186337.4  | 195299    | 189226.5  | 150622.9  | 108822.1  | 238483.1  | 175717.4  | 98911.94  | 108552.3  | 111201.8  |
| 192409.5  | 216235.4  | 179023.1  | 154182.8  | 98920.27  | 227015.9  | 192047.5  | 105941.3  | 120610.2  | 95501.14  |
| 184827.3  | 206964.3  | 161899    | 150613.8  | 101237.7  | 206753.1  | 188886.4  | 101871.2  | 119497.4  | 113232.6  |

|           |           |           |           |           |           |           |           |           |           |
|-----------|-----------|-----------|-----------|-----------|-----------|-----------|-----------|-----------|-----------|
| LP354.270 | LP354.27_ | LP354.269 | LP354.27_ | LP354.269 | LP354.269 | LP354.270 | LP354.27_ | LP354.270 | LP354.270 |
| 176002.3  | 99723.53  | 78599.66  | 102007.8  | 77579.47  | 72769.57  | 189220.1  | 97676.45  | 122548.2  | 119921.9  |
| 206671.9  | 99842.66  | 106756.4  | 110416.9  | 90481.37  | 74272.54  | 138388    | 87137.56  | 116381.1  | 124184.7  |
| 139871.4  | 109551    | 86037.45  | 100540.4  | 94719.82  | 72826.35  | 178312.6  | 90919.32  | 105073.2  | 165586.8  |
| 183784.4  | 101976    | 78941.64  | 89655.33  | 87381.71  | 82199.65  | 187137.1  | 87693.81  | 100189.2  | 113661.6  |
| 173263.6  | 90624.18  | 69983.64  | 103427.3  | 93620.72  | 67251.84  | 161693.9  | 92900.95  | 104601.9  | 106383.9  |

|           |           |           |           |           |           |           |          |           |          |
|-----------|-----------|-----------|-----------|-----------|-----------|-----------|----------|-----------|----------|
| LP354.269 | LP354.270 | LP354.270 | LP354.269 | LP354.269 | LP354.270 | LP354.270 | LP354.27 | LP354.270 | LP354.27 |
| 89698.09  | 158476.1  | 132184.8  | 150144.4  | 72552.14  | 107043.6  | 145894.6  | 77855.3  | 80588.65  | 150158.2 |
| 81536.49  | 178757.1  | 129664.5  | 179609.4  | 89084.13  | 112131.1  | 157573.2  | 87348.25 | 88729.61  | 138302.4 |
| 90280.91  | 151448.2  | 144627.5  | 149527.9  | 73192.77  | 109133.7  | 154892.6  | 85344.8  | 93302.82  | 137682.5 |
| 95049.04  | 149499.1  | 130423.6  | 137956.6  | 84199.91  | 107788.8  | 169368.7  | 71023.02 | 84411.05  | 137232.6 |
| 89462.02  | 125416    | 136669.2  | 149341.1  | 75440.27  | 93754.12  | 159237.5  | 76205.12 | 89341.32  | 127608.7 |



|           |           |           |           |           |           |           |           |           |           |
|-----------|-----------|-----------|-----------|-----------|-----------|-----------|-----------|-----------|-----------|
| LP354.269 | LP354.270 | LP354.27_ | LP354.270 | LP354.27_ | LP354.270 | LP354.270 | LP354.27_ | LP354.269 | LP354.270 |
| 91698.1   | 135041.5  | 122486.7  | 143161    | 210697.3  | 136696.2  | 104955.6  | 161729.3  | 67208.01  | 158013    |
| 88550.36  | 139084.9  | 128476.8  | 138403.4  | 211207.9  | 134589.3  | 110957.1  | 162058    | 116214.1  | 153813.4  |
| 96399.52  | 132415.3  | 144001.7  | 141781.5  | 223321.5  | 142028.9  | 114555.1  | 158239.2  | 70693.86  | 162964.2  |
| 87048.56  | 130364.4  | 127384.4  | 140712.5  | 215602.9  | 127881    | 100913.5  | 160744.7  | 60861.87  | 141280.7  |
| 80911.38  | 115795.9  | 120735.4  | 124571.5  | 207629.2  | 132230.5  | 108696.9  | 165161.4  | 64302.51  | 149955.2  |

|           |           |           |           |           |           |           |           |           |           |
|-----------|-----------|-----------|-----------|-----------|-----------|-----------|-----------|-----------|-----------|
| LP354.27_ | LP354.270 | LP354.269 | LP354.270 | LP354.27_ | LP354.269 | LP354.270 | LP354.270 | LP354.270 | LP354.270 |
| 144815.1  | 79526.19  | 166654    | 148916.6  | 199881.8  | 83799.37  | 90954.92  | 118596.3  | 92315.37  | 86576.66  |
| 140959.8  | 79414.47  | 156615.9  | 151005.9  | 139026.9  | 98074.34  | 86453.83  | 108248.5  | 97592.14  | 82040.14  |
| 163240.5  | 87367.13  | 162180.7  | 148193.9  | 196148.6  | 86971.42  | 93033.75  | 105078.6  | 98010.95  | 77481.82  |
| 128746.8  | 78208.58  | 143631    | 153173.9  | 134336.4  | 95337.2   | 82681.96  | 111923.7  | 91683.21  | 80556.73  |
| 127788.3  | 77265.13  | 152421.3  | 149132.3  | 129057.9  | 84956.29  | 78441.49  | 106338.2  | 98068.08  | 79507.9   |

|           |           |           |           |           |           |           |           |           |           |
|-----------|-----------|-----------|-----------|-----------|-----------|-----------|-----------|-----------|-----------|
| LP354.27_ | LP354.27_ | LP354.270 | LP354.270 | LP354.270 | LP354.269 | LP354.269 | LP354.270 | LP354.27_ | LP354.269 |
| 98772.04  | 110331.9  | 101935.7  | 71108.67  | 82388.55  | 64137.66  | 87272.01  | 115617    | 107779.6  | 70858.91  |
| 102814.9  | 110248.8  | 103553.6  | 75192.14  | 83434.58  | 51070.33  | 91801.18  | 107742.1  | 106901    | 77894.86  |
| 103226.1  | 108106.4  | 109893.8  | 74901.03  | 70372.77  | 58983.62  | 90974.84  | 117169.3  | 112142.1  | 80667.51  |
| 95193.59  | 115618.6  | 100323.5  | 62382.23  | 73475.08  | 53021.18  | 79340.85  | 99898.03  | 117790.7  | 77959.89  |
| 95135.92  | 96282.58  | 97064.32  | 71364.85  | 74375.24  | 58291.41  | 81331.41  | 108489.5  | 102038.3  | 77939.12  |

|           |           |           |           |           |           |           |           |           |           |
|-----------|-----------|-----------|-----------|-----------|-----------|-----------|-----------|-----------|-----------|
| LP354.277 | LP354.285 | LP354.285 | LP354.336 | LP354.336 | LP354.337 | LP354.345 | LP354.373 | LP354.373 | LP354.373 |
| 208294.2  | 199091.1  | 203752.3  | 400703.6  | 141148.9  | 69688.65  | 71064.86  | 266014.5  | 533111.2  | 70586.85  |
| 50826.07  | 174107.2  | 226763.3  | 396713.7  | 136535.9  | 76001.78  | 65260.13  | 292794    | 614897.3  | 73486.8   |
| 73212.49  | 210453.8  | 229372.8  | 78170.22  | 135630.6  | 61858.89  | 64106.62  | 469085.9  | 974313.3  | 77836.48  |
| 141884.9  | 67888.51  | 43233.82  | 250166.8  | 129130.8  | 54967.98  | 60900.84  | 571760.6  | 1206441   | 63611.71  |
| 108229.8  | 72646.82  | 216085.6  | 230017.2  | 127317.9  | 59604.33  | 71653.53  | 634712.9  | 1327087   | 67470.59  |

|           |           |           |           |           |           |           |           |           |           |
|-----------|-----------|-----------|-----------|-----------|-----------|-----------|-----------|-----------|-----------|
| LP354.946 | LP355.069 | LP355.069 | LP355.069 | LP355.070 | LP355.07_ | LP355.069 | LP355.096 | LP355.136 | LP355.172 |
| 298710.6  | 35211.37  | 30380.51  | 25030.2   | 11742.51  | 19582.41  | 21683.27  | 21475.93  | 27141.2   | 39987.21  |
| 292933.8  | 24732.07  | 31321.35  | 29408.2   | 13355.57  | 20806.42  | 23310.18  | 18953.41  | 20381.16  | 37603.27  |
| 246789.9  | 37375.23  | 32869.72  | 26121.78  | 11419.4   | 20926.39  | 24052.1   | 21085.5   | 26078.34  | 41295.17  |
| 214164.5  | 48428.66  | 36409.19  | 27097.46  | 13346.37  | 17707.92  | 14932.18  | 21858.94  | 21184.66  | 39757.23  |
| 221333.7  | 46662.11  | 38380.68  | 30029.83  | 15213.36  | 22917.55  | 19476.81  | 21083.93  | 21686.87  | 38779.07  |

|           |           |           |           |           |           |           |           |           |           |
|-----------|-----------|-----------|-----------|-----------|-----------|-----------|-----------|-----------|-----------|
| LP355.172 | LP355.172 | LP355.172 | LP355.172 | LP355.173 | LP355.173 | LP355.172 | LP355.172 | LP355.173 | LP355.173 |
| 63096.07  | 62990.25  | 43841.33  | 30219.71  | 65217.95  | 66032.68  | 80705.59  | 105506.8  | 102537.4  | 59677.24  |
| 67713.93  | 58967.92  | 50820.11  | 33423.34  | 81774.73  | 77972.03  | 114687.8  | 81540.58  | 48553.5   | 57033.13  |
| 61565.74  | 66450.44  | 45812.66  | 33078.04  | 75424.09  | 84441.66  | 97635.15  | 87778.29  | 87398.39  | 60640.66  |
| 55007.72  | 64498.49  | 43495.01  | 31363.25  | 94797.38  | 59353.53  | 79531.69  | 70564.97  | 57313.88  | 62152.7   |
| 62104.37  | 66454.54  | 43137.37  | 27737.73  | 88324.63  | 59983.32  | 93536.83  | 64543.94  | 75064.94  | 55970.41  |

|           |           |           |           |           |           |           |           |           |           |
|-----------|-----------|-----------|-----------|-----------|-----------|-----------|-----------|-----------|-----------|
| LP355.173 | LP355.172 | LP355.172 | LP355.173 |
| 71823.08  | 89940.41  | 67648.23  | 101019.5  | 89319.25  | 63224.69  | 60021.31  | 77325.68  | 56221.31  | 87269.03  |
| 106435.5  | 68646.24  | 60813.49  | 69825.95  | 73002.01  | 92694.08  | 97047.43  | 63407.65  | 48916.87  | 66605.68  |
| 91606.59  | 66406.63  | 54026.44  | 80414.95  | 68969.88  | 83610.42  | 90733.86  | 102770    | 84937.54  | 64879.33  |
| 58095.6   | 76443.51  | 54589.24  | 69491.53  | 71733.01  | 68124.59  | 81551.56  | 54252.26  | 83495.05  | 78311.58  |
| 100093.9  | 62558.32  | 94844.11  | 87766.35  | 69495.64  | 98037.7   | 115572    | 62892.06  | 84262.69  | 90414.31  |

|           |           |           |           |           |           |           |           |           |           |
|-----------|-----------|-----------|-----------|-----------|-----------|-----------|-----------|-----------|-----------|
| LP355.172 | LP355.173 |
| 54658.33  | 53591.88  | 120161.6  | 84628.29  | 98470.68  | 112332.2  | 69386.45  | 73218.01  | 70717.36  | 108143.6  |
| 113998.5  | 61118.85  | 79816.58  | 115969.2  | 57308.08  | 58037.22  | 61911.79  | 77293.69  | 116045.3  | 66753.91  |
| 73902.51  | 52047.16  | 57940.31  | 72387.13  | 80672.16  | 76148.07  | 52898.4   | 62122.59  | 120794.1  | 87854.73  |
| 59248.25  | 63228.13  | 57087.96  | 73768.27  | 92456.51  | 73452.22  | 79666.37  | 66641.48  | 74101.01  | 75255     |
| 72781.86  | 61603.72  | 72707.4   | 129271.6  | 87607.56  | 87469.56  | 65277.07  | 67601.03  | 57568.53  | 132195.9  |



|           |           |           |           |           |           |           |           |           |           |           |
|-----------|-----------|-----------|-----------|-----------|-----------|-----------|-----------|-----------|-----------|-----------|
| LP355.173 | LP355.173 | LP355.173 | LP355.173 | LP355.172 | LP355.173 | LP355.173 | LP355.173 | LP355.173 | LP355.173 | LP355.173 |
| 75255.81  | 87526.11  | 82265.85  | 59310.64  | 106955.3  | 61385.65  | 61854.28  | 61433.61  | 96012.15  | 72065.52  |           |
| 87987.63  | 59627.56  | 69117.46  | 69909.09  | 59652.89  | 71789.38  | 60985.39  | 69880.25  | 60799.61  | 74352.73  |           |
| 80745.95  | 77282.93  | 83231.73  | 88848.07  | 63218.11  | 82512.94  | 66941.54  | 50915.28  | 76166.93  | 67384.96  |           |
| 103249.8  | 79830.39  | 66864.28  | 66555.23  | 61025.46  | 82173.67  | 79194.81  | 59052.14  | 74329.27  | 79765.64  |           |
| 94184.42  | 64703.17  | 103842    | 56734.62  | 73761.11  | 60381.91  | 65720.8   | 67243.87  | 103121.5  | 76756.08  |           |

|           |           |           |           |           |           |           |           |           |           |
|-----------|-----------|-----------|-----------|-----------|-----------|-----------|-----------|-----------|-----------|
| LP355.173 |
| 28640.26  | 94437.08  | 75401.1   | 106647.3  | 49458.68  | 61942.8   | 53552.87  | 58352.75  | 68638.29  | 47743.23  |
| 23619.03  | 83622.7   | 77043.17  | 57424.63  | 52498.41  | 71688.56  | 68914.24  | 40924.19  | 77758.68  | 57112.05  |
| 20300.48  | 62038.02  | 59510.08  | 80153.7   | 37497.19  | 107185.9  | 62182.79  | 99248.26  | 76150.32  | 69462.08  |
| 25932.98  | 99488.3   | 104750.9  | 69749.45  | 41779.21  | 66927.19  | 47382.43  | 62542.99  | 102302.4  | 49470.23  |
| 36655.7   | 67654.42  | 133626.8  | 94162.53  | 47287.75  | 77575.34  | 43115.65  | 49821.85  | 71173.95  | 58893.27  |

|           |           |           |           |           |           |           |           |           |           |
|-----------|-----------|-----------|-----------|-----------|-----------|-----------|-----------|-----------|-----------|
| LP355.173 | LP355.172 | LP355.173 | LP355.173 |
| 77823.53  | 79763.85  | 26537.6   | 77776.09  | 60081.84  | 58581.89  | 58342.72  | 72644.78  | 51607.68  | 72865.84  |
| 80515.87  | 82081.42  | 39795.17  | 58954.68  | 49632.45  | 73971.18  | 52513.86  | 60850.75  | 61325.75  | 62716.72  |
| 75009.01  | 88715.27  | 40948.28  | 76229.82  | 62330.67  | 68951.86  | 56279.95  | 63601.27  | 56269.33  | 51423.89  |
| 115259.7  | 77753.55  | 31127.68  | 51731.68  | 60500.37  | 71634.76  | 58382.3   | 74684.34  | 55011.85  | 66072.43  |
| 89262.65  | 66775.23  | 31449.55  | 80128.48  | 71273.21  | 74048.09  | 60944.15  | 79179.72  | 62082.11  | 62897.58  |

|           |           |           |           |           |           |           |           |           |           |           |
|-----------|-----------|-----------|-----------|-----------|-----------|-----------|-----------|-----------|-----------|-----------|
| LP355.173 |
| 63707.38  | 91111.22  | 39345.81  | 55968.42  | 33035.61  | 57799.18  | 68079.01  | 88471.09  | 58176.19  | 64921.84  |           |
| 52270.62  | 73051.41  | 54368.88  | 68407.72  | 33273.16  | 69823.31  | 62770.59  | 89666.52  | 52395.39  | 96277.39  |           |
| 67797.96  | 123279.3  | 40731.79  | 41678.09  | 35633.23  | 61537.7   | 73193.71  | 76228.86  | 47207.87  | 74704.67  |           |
| 67028.68  | 87737.47  | 34931.23  | 54896.28  | 32858.61  | 62183.16  | 71826.87  | 75616.86  | 48792.83  | 97883.02  |           |
| 68456.13  | 72605.43  | 33035.15  | 67226.29  | 31012.94  | 52456.66  | 72922.48  | 109989.4  | 40446.03  | 73496.51  |           |

|           |           |           |           |           |           |           |           |           |           |
|-----------|-----------|-----------|-----------|-----------|-----------|-----------|-----------|-----------|-----------|
| LP355.173 |
| 61636.38  | 37274.08  | 25215.68  | 28949.59  | 55429.55  | 31193.34  | 39053.77  | 61936.82  | 32828.27  | 65834.91  |
| 52713.38  | 29802.49  | 28285.26  | 28628.59  | 72123.98  | 21515.46  | 40981.37  | 54987.9   | 34213.96  | 62641.59  |
| 70659.53  | 41535.82  | 23132.84  | 35998.35  | 82383.02  | 29891.63  | 34132.9   | 70105.84  | 35339.6   | 70954.44  |
| 64769.8   | 32074.89  | 27828.93  | 26784.98  | 81964.53  | 23820.18  | 38828.28  | 55254.97  | 27743.47  | 66587.05  |
| 64248.22  | 32787.25  | 24086.46  | 21228.16  | 52004.75  | 29999.96  | 30068.07  | 58436.07  | 30319.29  | 72940.31  |

|           |           |           |           |           |           |           |           |           |           |
|-----------|-----------|-----------|-----------|-----------|-----------|-----------|-----------|-----------|-----------|
| LP355.173 | LP355.252 | LP355.272 | LP355.284 |
| 63399.9   | 73202.24  | 29028.82  | 85467.05  | 54022.01  | 74534.24  | 36547.64  | 39311.14  | 77454.79  | 164029.9  |
| 63176.32  | 69022.21  | 51128.06  | 61119.32  | 60729.64  | 72915.81  | 50111.9   | 39769.12  | 69803.8   | 125423.4  |
| 67773.03  | 79930.33  | 37056.45  | 83356.46  | 46109.03  | 86108.22  | 31034.05  | 32211.49  | 74085     | 144060.7  |
| 55490.38  | 71104.99  | 29071.61  | 80682.97  | 45528.94  | 75669.25  | 33937.24  | 69956.97  | 76629.92  | 120353.5  |
| 54364.14  | 57464.92  | 25128.67  | 88106.18  | 44432.78  | 74696.37  | 35951.31  | 67785.82  | 70444.01  | 117739.7  |

|           |           |           |           |           |           |           |           |           |           |           |
|-----------|-----------|-----------|-----------|-----------|-----------|-----------|-----------|-----------|-----------|-----------|
| LP355.284 | LP355.340 |
| 79918.86  | 91884.87  | 77266.82  | 64769.68  | 35647.06  | 37186.87  | 42502.77  | 71174.64  | 42154.13  | 33352.05  |           |
| 88652.84  | 80590.02  | 73656.7   | 56342.77  | 37031.24  | 38203.19  | 40215.12  | 69296.73  | 42861.73  | 38023.47  |           |
| 89504.26  | 87452.72  | 72141.79  | 59389.16  | 44268.41  | 39009.66  | 39718.42  | 77851.5   | 40633.45  | 32283.85  |           |
| 93267.3   | 70748.43  | 71916.96  | 57438.24  | 42161.74  | 35795.45  | 42970.3   | 66238.58  | 39345.08  | 29563.46  |           |
| 97916.42  | 84161.74  | 75685.47  | 51845.72  | 35583.11  | 33091.44  | 40173.53  | 70883.14  | 42167.32  | 29280.19  |           |

|           |           |           |           |           |           |           |           |           |           |
|-----------|-----------|-----------|-----------|-----------|-----------|-----------|-----------|-----------|-----------|
| LP355.340 | LP355.340 | LP355.368 | LP355.368 | LP355.876 | LP355.949 | LP356.206 | LP356.279 | LP356.288 | LP356.288 |
| 56686.95  | 23065.49  | 79905.02  | 34523     | 41625.58  | 50827.57  | 47680.01  | 19623.37  | 37218.65  | 26963.47  |
| 61426.93  | 21639.55  | 74345.74  | 37000.25  | 35321.26  | 54359.06  | 49150.35  | 23669.37  | 37092.31  | 23246.23  |
| 75372.82  | 18388.6   | 73978.1   | 27496.68  | 54455.78  | 41554.8   | 44365.94  | 23656.06  | 22330.81  | 24744.52  |
| 80961.22  | 22072.23  | 78579.3   | 17664.48  | 75905.99  | 31120.38  | 39645.36  | 22240.34  | 32778.44  | 26504.49  |
| 87606.33  | 17554.35  | 82931.77  | 27872.74  | 30292.53  | 28656.6   | 32827.26  | 22134.58  | 29886.45  | 25283.84  |



|           |           |           |           |           |           |           |           |           |           |
|-----------|-----------|-----------|-----------|-----------|-----------|-----------|-----------|-----------|-----------|
| LP356.288 | LP356.316 | LP356.316 | LP356.352 | LP356.363 | LP356.371 | LP356.942 | LP357.152 | LP357.152 | LP357.152 |
| 22884.81  | 53274.03  | 22115.52  | 47443.9   | 19097.9   | 11798.93  | 48807.65  | 141657.5  | 168211.4  | 207593.9  |
| 20004.33  | 52460.5   | 22310.39  | 48980.05  | 23238.16  | 25752.51  | 47922.47  | 195192.8  | 147083.2  | 164467.3  |
| 19096.78  | 46261.64  | 22092.07  | 48466.22  | 21345.63  | 25606.87  | 38733.41  | 186353    | 172353.6  | 177622.8  |
| 20337.98  | 53060.24  | 20624.25  | 54751.66  | 18645.37  | 26552.42  | 33924.39  | 152345.5  | 228174.7  | 220893    |
| 21346.93  | 51974.1   | 22732.11  | 57065.37  | 23156.88  | 25236.83  | 38326.87  | 139780    | 128906.7  | 142270.2  |

|           |           |           |           |           |           |           |           |           |           |
|-----------|-----------|-----------|-----------|-----------|-----------|-----------|-----------|-----------|-----------|
| LP357.152 |
| 103319    | 169663.9  | 138974    | 172213    | 123101.1  | 132082.2  | 95694.55  | 92517.76  | 144505.5  | 86541.07  |
| 114162.6  | 124467.9  | 137336.2  | 132005.4  | 153300.6  | 145829.7  | 103486.7  | 96456.53  | 159693.5  | 102434.7  |
| 107914.5  | 115436.4  | 114616    | 178307.3  | 155681    | 139196.7  | 106640.9  | 102558    | 132960.1  | 71785.69  |
| 157295.6  | 122978.4  | 120403    | 213217.3  | 170273.5  | 152856.7  | 106475.2  | 105923    | 179243.5  | 76892.12  |
| 108728.4  | 161166.9  | 138457.1  | 105738.9  | 162906.5  | 125314.5  | 103109.8  | 131469.9  | 234904.8  | 77447.38  |

|           |           |           |           |           |           |           |           |           |           |
|-----------|-----------|-----------|-----------|-----------|-----------|-----------|-----------|-----------|-----------|
| LP357.152 |
| 139034.7  | 107420.7  | 46483.86  | 48340.02  | 162950.5  | 213501.1  | 144663.8  | 201972    | 144759.4  | 174393.5  |
| 134561    | 90104.81  | 45418.66  | 46284.97  | 132117    | 227577.4  | 292228.3  | 226230.3  | 203473.7  | 237445.9  |
| 140940.8  | 77854.84  | 41799.32  | 38760.9   | 182078.4  | 133319.6  | 174241.6  | 170132.9  | 230774.3  | 162464.9  |
| 93791.91  | 108081    | 38096.31  | 44867.55  | 239756.1  | 149349.3  | 194705.5  | 203652.4  | 197506.5  | 159755.3  |
| 112626.7  | 99691.11  | 44627.72  | 45790.98  | 184929.7  | 148344.6  | 181832.6  | 185182.1  | 143268.9  | 173145.9  |

|           |           |           |           |           |           |           |           |           |           |
|-----------|-----------|-----------|-----------|-----------|-----------|-----------|-----------|-----------|-----------|
| LP357.152 |
| 198613.1  | 136674.7  | 214991.4  | 237756    | 192026.4  | 192332.5  | 225386.6  | 247129.7  | 175000.2  | 261696.2  |
| 197306.6  | 193493    | 221757.8  | 182734.2  | 113078.3  | 158763.8  | 191562.2  | 174993.7  | 138454.5  | 312170.3  |
| 206061    | 157129.6  | 235481.9  | 172368    | 218335.3  | 199899.9  | 179769.1  | 181583.3  | 189105.6  | 228008.7  |
| 241055.6  | 213572.1  | 214072.4  | 203130.4  | 104764.4  | 117888.9  | 195931.8  | 166509.1  | 178507.4  | 206655.1  |
| 230076.2  | 134311.6  | 212885.6  | 218657.9  | 123686.9  | 141857.9  | 196245.3  | 206395.2  | 144648.5  | 207854.4  |

|           |           |           |           |           |           |           |           |           |           |
|-----------|-----------|-----------|-----------|-----------|-----------|-----------|-----------|-----------|-----------|
| LP357.152 |
| 206846.9  | 163563.8  | 151001.3  | 111551    | 144971.5  | 162430.3  | 178492.1  | 113128.3  | 235395.7  | 106694.6  |
| 205903.7  | 232819    | 166906.9  | 135176.2  | 168086.6  | 141729.5  | 175437.7  | 160782.5  | 325949.4  | 101156.9  |
| 175144.6  | 210978.1  | 213724.4  | 124648.7  | 166193.7  | 160085.6  | 149696.3  | 118017.6  | 192059.1  | 112386    |
| 158315.1  | 179702.4  | 170845.7  | 162599.9  | 173954.9  | 176501.4  | 202967.8  | 102901.1  | 249409.8  | 100495    |
| 236515.9  | 154026.1  | 185736.4  | 129218.3  | 207825.7  | 151115.7  | 147759.1  | 137116.7  | 187386.4  | 116427.6  |

|           |           |           |           |           |           |           |           |           |           |
|-----------|-----------|-----------|-----------|-----------|-----------|-----------|-----------|-----------|-----------|
| LP357.152 |
| 212415.8  | 63106.69  | 215090.6  | 130439.4  | 115111.8  | 115784.6  | 200265.1  | 207704.4  | 117069.8  | 169085.7  |
| 177052.2  | 61996.76  | 270883.6  | 136936.8  | 128996.7  | 129530.2  | 201033.3  | 153072.3  | 107482.9  | 186986.1  |
| 118141.6  | 61621.03  | 180400.9  | 133229.3  | 121295.9  | 126586    | 162083.1  | 207548.4  | 147912.2  | 170394.6  |
| 139383.5  | 56977.87  | 182460.3  | 139413.6  | 120967.8  | 139894    | 176386.5  | 188044.7  | 127403.5  | 182442.1  |
| 200582.8  | 60794.51  | 160305.2  | 123742.2  | 117813.8  | 148319.9  | 172136.6  | 214052    | 140738.5  | 217752.6  |

|           |           |           |           |           |           |           |           |           |           |
|-----------|-----------|-----------|-----------|-----------|-----------|-----------|-----------|-----------|-----------|
| LP357.152 |
| 135846.7  | 123612.1  | 103952.2  | 173974.1  | 171917.8  | 129028    | 136676.4  | 133978.4  | 133801.3  | 150733.8  |
| 241254.9  | 95196.16  | 155728.2  | 156049    | 215658.2  | 139498.4  | 156431.9  | 124556.2  | 134973.9  | 199429.1  |
| 180114.1  | 118421.4  | 135861.2  | 268505.6  | 173725.4  | 185568.3  | 132028.4  | 130027.3  | 140682.5  | 152296.1  |
| 264422.1  | 115883.9  | 125979.5  | 160739.6  | 168691.3  | 125581.4  | 157441.2  | 145490.6  | 155518.2  | 147400.7  |
| 221118.9  | 94162.92  | 156645.7  | 143286.5  | 158793.3  | 122870.2  | 152325.8  | 145796.8  | 109759.6  | 161738.5  |

|            |            |            |            |            |            |            |            |            |            |
|------------|------------|------------|------------|------------|------------|------------|------------|------------|------------|
| LP357.152! |
| 176441.7   | 40293.41   | 116959.1   | 121213.1   | 149128.4   | 115850.7   | 194569.5   | 55945.26   | 150484.3   | 166689.7   |
| 217898     | 45085.9    | 111120.3   | 104378.6   | 118174.3   | 97170.03   | 126708.5   | 77642.64   | 146172.3   | 154889.3   |
| 219690.4   | 51193.23   | 134062.4   | 90417.38   | 212251.9   | 124515.9   | 119200.9   | 76392.92   | 135408     | 135249.1   |
| 166838.6   | 47872.6    | 113986.7   | 117427.4   | 114421.6   | 157340.4   | 115938.7   | 42779.79   | 124639.8   | 129468.7   |
| 171619.8   | 69198.31   | 111400.5   | 127731.8   | 127355.9   | 226147.4   | 137584.1   | 52287.3    | 121430.7   | 166663.4   |



|           |           |           |           |           |           |           |           |           |           |
|-----------|-----------|-----------|-----------|-----------|-----------|-----------|-----------|-----------|-----------|
| LP357.152 |
| 94508.43  | 66463.29  | 63928.76  | 127826.1  | 128215    | 58391.44  | 60036.18  | 126276    | 52381.87  | 67375.8   |
| 98855.74  | 61351.36  | 62398.88  | 113961.3  | 155090    | 51370.43  | 62831.13  | 128706.6  | 51071.12  | 54055.99  |
| 125655.8  | 62600.29  | 72108.3   | 91236.9   | 131686    | 40769.75  | 55307.32  | 138886.1  | 36966.01  | 60879.54  |
| 92314.25  | 60076.47  | 64969.5   | 113018.6  | 134186.5  | 50600.97  | 51261.02  | 121579    | 46402.04  | 52106.72  |
| 100119.3  | 53434.64  | 90881.33  | 115888.8  | 120630.4  | 55721.82  | 57244.49  | 109431.3  | 52990.89  | 65731.22  |

|            |            |           |            |            |            |           |           |            |           |
|------------|------------|-----------|------------|------------|------------|-----------|-----------|------------|-----------|
| LP357.152! | LP357.152! | LP357.153 | LP357.152! | LP357.152! | LP357.152! | LP357.19_ | LP357.189 | LP357.189! | LP357.189 |
| 66448.61   | 158731.4   | 129697    | 165035.5   | 143342     | 99513.33   | 135782.9  | 125738.7  | 101718.9   | 109077.6  |
| 50258.33   | 160048.1   | 130788.7  | 173626     | 139111.9   | 100549     | 136993.3  | 131512.9  | 104127.3   | 105208    |
| 65968.77   | 156378.7   | 134992.8  | 159593.6   | 134594.2   | 96226.76   | 143670.7  | 130981.8  | 97917.84   | 118099.6  |
| 54069.73   | 161906.7   | 127477.8  | 156978     | 131556.6   | 94025.19   | 76081.56  | 69297.2   | 92966.65   | 62482.33  |
| 60882.6    | 166838.7   | 149105.2  | 164151.5   | 133363.8   | 106405.4   | 88913.27  | 137795.8  | 106493.8   | 114575.9  |

|           |           |           |           |           |           |           |           |           |           |
|-----------|-----------|-----------|-----------|-----------|-----------|-----------|-----------|-----------|-----------|
| LP357.189 |
| 116718.7  | 141222.2  | 141873.3  | 36471.61  | 46275.71  | 194568.5  | 210431.3  | 137163.4  | 141129    | 123755.3  |
| 117756.3  | 141292.4  | 151608.3  | 34240.97  | 48997.5   | 209031.5  | 209136.8  | 133429.2  | 140994.5  | 125683    |
| 114606.9  | 137088.5  | 149323.8  | 33266.79  | 46072.92  | 217763.8  | 213893.6  | 64769.03  | 131152.3  | 137585.9  |
| 65424.94  | 131437.3  | 79097.95  | 30085.58  | 41537.67  | 199733.1  | 216733.5  | 139276.3  | 128713.8  | 117419.5  |
| 126994.5  | 143486.1  | 155070.2  | 35717.36  | 45017.47  | 218081.2  | 212036.2  | 136517.5  | 130648.3  | 118315.3  |

|           |           |           |           |           |           |           |           |           |           |
|-----------|-----------|-----------|-----------|-----------|-----------|-----------|-----------|-----------|-----------|
| LP357.189 | LP357.189 | LP357.189 | LP357.189 | LP357.189 | LP357.189 | LP357.190 | LP357.189 | LP357.189 | LP357.19_ |
| 111668.5  | 175166.1  | 146133.4  | 101065    | 173545.2  | 111090.3  | 130983.9  | 56874.88  | 143190.7  | 106355.7  |
| 104669.2  | 171254.7  | 145746.5  | 101991.7  | 180050.2  | 54637.08  | 119111.2  | 62493.01  | 149788.9  | 103767.8  |
| 117692.8  | 161950.7  | 150011.1  | 100759.1  | 186406    | 98807.57  | 131364    | 58841.94  | 152699.4  | 94823.75  |
| 115747.9  | 187149.7  | 146318.2  | 93857.5   | 184343.4  | 109520    | 128506.9  | 61529.26  | 139264.9  | 96867.78  |
| 116732.5  | 87760.45  | 132126.7  | 97919.2   | 176671.5  | 113524.3  | 126741    | 63384.06  | 145884.8  | 106261.2  |

|           |           |           |           |           |           |           |           |           |           |
|-----------|-----------|-----------|-----------|-----------|-----------|-----------|-----------|-----------|-----------|
| LP357.189 | LP357.189 | LP357.189 | LP357.189 | LP357.19_ | LP357.189 | LP357.226 | LP357.226 | LP357.227 | LP357.384 |
| 75931.58  | 123471    | 69353.4   | 182464.9  | 42255.56  | 198786    | 187823.4  | 150820.7  | 169909.6  | 23110.73  |
| 80805.6   | 135062.9  | 74765.16  | 180804.6  | 44400.42  | 92054.79  | 179041.5  | 167462.3  | 157473    | 24719.73  |
| 72862.54  | 139339    | 68966.33  | 190400.3  | 40932.51  | 189976.6  | 182538.6  | 173469.8  | 189227    | 40109.03  |
| 79469.74  | 123555.3  | 81519.26  | 93979.9   | 35552.79  | 206087.1  | 182360.4  | 163142.1  | 176811.2  | 47534.52  |
| 70761.38  | 136886.3  | 84339.43  | 194817.1  | 40697.08  | 198775.2  | 183566.2  | 145964.8  | 183834    | 52672.5   |

|           |           |           |           |           |           |           |           |           |           |
|-----------|-----------|-----------|-----------|-----------|-----------|-----------|-----------|-----------|-----------|
| LP358.155 | LP358.258 | LP358.259 | LP358.259 | LP358.258 | LP358.259 | LP358.308 | LP358.444 | LP359.167 | LP359.167 |
| 28742.31  | 48434.15  | 38973.22  | 61139.5   | 48947.02  | 45213.81  | 40603.98  | 30483.27  | 168505.9  | 38547.13  |
| 24416.93  | 47986.96  | 35610.68  | 61031.37  | 48266.86  | 42111.35  | 37435.34  | 23753.61  | 216363.6  | 40263.81  |
| 25766.32  | 47989.04  | 44907.1   | 68954.36  | 45427.37  | 41914.91  | 38541.13  | 23531.38  | 179066.8  | 35690.01  |
| 28759.93  | 51150.78  | 38492.74  | 63272.26  | 45294.94  | 40872.22  | 12626.89  | 19514.71  | 178164    | 35130.33  |
| 27370.8   | 47085.99  | 37732.21  | 57431.73  | 47451.91  | 43920.62  | 40301.52  | 24435.6   | 176640.5  | 31819.31  |

|           |           |           |           |           |           |           |           |           |           |
|-----------|-----------|-----------|-----------|-----------|-----------|-----------|-----------|-----------|-----------|
| LP359.167 | LP359.167 | LP359.168 | LP359.167 | LP359.167 | LP359.168 | LP359.168 | LP359.167 | LP359.168 | LP359.167 |
| 54251.42  | 134613.3  | 185559.3  | 166555.7  | 142708    | 157523.4  | 159363.4  | 143788.1  | 179479.3  | 123226.9  |
| 65948.26  | 220881.9  | 160358.1  | 183496.2  | 155051.3  | 181281    | 187097    | 183180.8  | 198972.1  | 143449.1  |
| 43459.98  | 221028.1  | 150655.1  | 143400.4  | 129784.8  | 165714.5  | 157593    | 209241    | 196598.3  | 176648.8  |
| 52571.51  | 209363    | 193633.3  | 137311.6  | 142152.3  | 230567.6  | 161671.6  | 206806    | 206275.1  | 191896    |
| 50218.37  | 134308.2  | 182040.8  | 153053.8  | 158707.9  | 221015.8  | 223727.8  | 220105.5  | 170734.5  | 141267.5  |

|           |           |           |           |           |           |           |           |           |           |
|-----------|-----------|-----------|-----------|-----------|-----------|-----------|-----------|-----------|-----------|
| LP359.167 | LP359.168 | LP359.168 | LP359.168 | LP359.167 | LP359.167 | LP359.168 | LP359.168 | LP359.168 | LP359.168 |
| 181535.9  | 174067.1  | 201385    | 272665.4  | 138711.1  | 167872.8  | 143394    | 177034.2  | 187847.6  | 129023.2  |
| 142053.2  | 205409.9  | 128379    | 188251.4  | 136002.3  | 180728.1  | 156474.9  | 149457.7  | 167781.5  | 163155.2  |
| 123798    | 170189    | 156685.4  | 160255.5  | 114155.9  | 181598.4  | 229379.7  | 197104.9  | 162355.4  | 144553.5  |
| 193469.2  | 199034.8  | 185971.5  | 234321.3  | 135343    | 194462.2  | 200891.2  | 127333.4  | 137380.4  | 179788.7  |
| 145682.9  | 222998.8  | 125784.4  | 222445.8  | 154576.1  | 205486.4  | 190369    | 146109.4  | 168333.3  | 151469.1  |



|            |           |           |           |            |           |           |           |           |           |
|------------|-----------|-----------|-----------|------------|-----------|-----------|-----------|-----------|-----------|
| LP359.167! | LP359.168 | LP359.168 | LP359.168 | LP359.167! | LP359.168 | LP359.168 | LP359.168 | LP359.168 | LP359.168 |
| 226159.5   | 230274.6  | 338812    | 106176.2  | 104128.9   | 147655.4  | 207318.6  | 115806.2  | 163555    | 198638.8  |
| 149698.1   | 253377    | 246411.8  | 145072.5  | 139516.1   | 162290.4  | 281066.6  | 118216.9  | 131828    | 188147.1  |
| 190240.7   | 237288.4  | 198814.5  | 122806.4  | 193382.2   | 110342.4  | 210102.5  | 143719.8  | 147069.4  | 136582.9  |
| 145594.2   | 211760.3  | 262881.2  | 117743.9  | 133312.9   | 139117.4  | 162134.2  | 101274.9  | 181520.3  | 136519.7  |
| 152593.1   | 185240.1  | 205716.5  | 132078.9  | 129960.8   | 170549.5  | 170762.1  | 135399.4  | 159809.8  | 180408.6  |

|           |           |           |           |           |           |           |           |           |           |
|-----------|-----------|-----------|-----------|-----------|-----------|-----------|-----------|-----------|-----------|
| LP359.168 | LP359.168 | LP359.168 | LP359.168 | LP359.167 | LP359.168 | LP359.168 | LP359.167 | LP359.168 | LP359.168 |
| 144695    | 180611    | 230760.6  | 137212    | 138065.1  | 175552.7  | 157137.7  | 134082.5  | 142681    | 144690.5  |
| 122670.1  | 284964.1  | 239159.7  | 177248.1  | 130933.2  | 176735.6  | 80932.21  | 208070.6  | 216600.2  | 147206.3  |
| 162236.4  | 222138.8  | 278811.8  | 144849.3  | 120757.9  | 158548.7  | 100467.5  | 158215.8  | 244409.2  | 154840.2  |
| 94461.33  | 248519.6  | 245103.9  | 131780.9  | 132900.8  | 127901.2  | 111162.7  | 183078.1  | 169103.3  | 119016.8  |
| 131739.7  | 212815.2  | 180395.4  | 144882.1  | 213362.3  | 198936.5  | 87087.26  | 145568.6  | 167183    | 170361.5  |

|           |           |           |           |           |           |           |           |           |           |
|-----------|-----------|-----------|-----------|-----------|-----------|-----------|-----------|-----------|-----------|
| LP359.168 | LP359.168 | LP359.168 | LP359.167 | LP359.168 | LP359.168 | LP359.168 | LP359.168 | LP359.168 | LP359.168 |
| 298874.4  | 147560.8  | 129281.5  | 156230.3  | 229906    | 105899.8  | 156240.4  | 121614.9  | 127849.2  | 155354.7  |
| 201295.3  | 135697.2  | 134642.5  | 110705.3  | 131187.4  | 105019.1  | 169658.5  | 117672.1  | 144139.8  | 126735.5  |
| 194966.6  | 161327.4  | 147793.8  | 92020.88  | 114350.1  | 139998.2  | 179815.8  | 95420.05  | 149936.1  | 117242.3  |
| 214607.5  | 181313.9  | 173076.1  | 131272.9  | 112082.4  | 87694.27  | 148855.3  | 123357.6  | 141785.5  | 109922.8  |
| 202252.2  | 263722.7  | 125356.9  | 121954.8  | 128421.2  | 120606.7  | 206006.9  | 132395.1  | 123406.1  | 125357.9  |

|            |            |           |           |           |           |           |            |            |           |
|------------|------------|-----------|-----------|-----------|-----------|-----------|------------|------------|-----------|
| LP359.168: | LP359.167: | LP359.168 | LP359.168 | LP359.168 | LP359.168 | LP359.168 | LP359.167: | LP359.168: | LP359.168 |
| 201714.3   | 152671.3   | 81120.96  | 149650.3  | 155623.8  | 179602.8  | 175375    | 124123     | 80996.58   | 128718.4  |
| 195371.1   | 120721.9   | 70633.56  | 142196.7  | 158727    | 204649.4  | 147836.7  | 143109.1   | 74061.82   | 133658.9  |
| 191950.1   | 140474.5   | 62527.44  | 151163.7  | 192882.5  | 210283.4  | 197549.4  | 91640.72   | 83687.25   | 160301.3  |
| 156991.5   | 141294.6   | 56336.27  | 209354.6  | 185394.3  | 200662.9  | 150140.2  | 121537.7   | 71586.08   | 134188.3  |
| 229991.2   | 150449.7   | 59068.68  | 148270.5  | 199305.5  | 192161.9  | 194473.5  | 138208.2   | 85682.52   | 195604.7  |

|           |           |           |           |           |           |           |           |           |           |
|-----------|-----------|-----------|-----------|-----------|-----------|-----------|-----------|-----------|-----------|
| LP359.168 | LP359.167 | LP359.168 | LP359.167 | LP359.168 | LP359.168 | LP359.168 | LP359.168 | LP359.168 | LP359.168 |
| 142407.5  | 102975.4  | 118357.4  | 95769.65  | 96815.02  | 61245.32  | 124584.2  | 123684.2  | 139631.2  | 49763.67  |
| 168263.6  | 96018.13  | 114110.7  | 130412.4  | 79202.53  | 59387.58  | 158460.8  | 193791.2  | 162379.1  | 60694.63  |
| 160652.3  | 93984.75  | 113782.8  | 116356.2  | 95802.89  | 74516.07  | 134247.6  | 168170.2  | 118614.6  | 57768.5   |
| 158478.3  | 114408.6  | 121126.2  | 70014.54  | 98492.56  | 55326.35  | 153733.8  | 125323.2  | 183628.1  | 40753.26  |
| 150991.1  | 98424.15  | 128189.4  | 81169.35  | 97127.92  | 63664.82  | 157568.2  | 120274.6  | 147615.7  | 51510.95  |

|           |           |           |           |           |           |           |           |           |           |
|-----------|-----------|-----------|-----------|-----------|-----------|-----------|-----------|-----------|-----------|
| LP359.168 | LP359.168 | LP359.167 | LP359.168 |
| 49119.27  | 89795.44  | 51397.22  | 38985.74  | 67008.65  | 38197.78  | 111110.2  | 159476.2  | 192130.3  | 158916.5  |
| 46301.1   | 74141.72  | 59441.37  | 46416.72  | 67059.5   | 30760.6   | 118906.8  | 187471.7  | 180831.1  | 161438.7  |
| 46932.77  | 73956.83  | 44914.78  | 36091.66  | 57545.06  | 55239.68  | 175307.4  | 223319.3  | 309122.5  | 162815.7  |
| 36345.59  | 53586.7   | 68579.89  | 43069.38  | 54421.64  | 30291.33  | 149349.5  | 169172.8  | 252432.8  | 157809.4  |
| 38720.68  | 67846.48  | 44849.37  | 49504.58  | 65630.7   | 39789.17  | 124769.7  | 238278.6  | 169339.2  | 152999.7  |

|           |           |           |           |           |           |           |           |           |           |
|-----------|-----------|-----------|-----------|-----------|-----------|-----------|-----------|-----------|-----------|
| LP359.168 | LP359.168 | LP359.315 |
| 57476.15  | 50365.35  | 1677891   | 1646194   | 673252.5  | 243698.8  | 351156    | 1095911   | 1125185   | 319138.6  |
| 56455.42  | 47618.35  | 1778679   | 1572306   | 542840.3  | 292082.6  | 553164.7  | 1051049   | 929712.1  | 254699.5  |
| 46106.68  | 43429.62  | 2176967   | 1625494   | 759715.8  | 268186.1  | 311443.5  | 774360    | 1110657   | 298185.3  |
| 54753.37  | 73564.82  | 2587455   | 920355.2  | 513103.2  | 377255.1  | 413037.3  | 1162194   | 1070392   | 323262.9  |
| 48648.44  | 55073.76  | 2910423   | 1650420   | 722123.8  | 331138.3  | 304031.5  | 882568.6  | 739871.2  | 288953.8  |

|           |           |           |           |           |           |           |           |           |           |
|-----------|-----------|-----------|-----------|-----------|-----------|-----------|-----------|-----------|-----------|
| LP359.315 |
| 310493.6  | 904105.8  | 873715.7  | 958737    | 210093.3  | 250386.8  | 1108483   | 402427.8  | 1202352   | 276024.9  |
| 385847.1  | 1536174   | 1264047   | 1109286   | 190354.1  | 373066.2  | 688150.9  | 439600.8  | 1360144   | 397492.1  |
| 394873.7  | 1052761   | 993210.4  | 956985.2  | 223613.4  | 247871.6  | 939995.9  | 376518.4  | 1088399   | 257733.1  |
| 485871.3  | 1054518   | 939872.1  | 1268257   | 191364.8  | 316946    | 933811.5  | 250006.2  | 1462324   | 317545.5  |
| 322528.7  | 1384340   | 737380.9  | 860049.1  | 203632.3  | 230138.3  | 733308.4  | 320345.8  | 1529169   | 340221.6  |



|           |           |           |           |           |           |           |           |           |           |
|-----------|-----------|-----------|-----------|-----------|-----------|-----------|-----------|-----------|-----------|
| LP359.315 | LP359.315 | LP359.315 | LP359.315 | LP359.315 | LP359.315 | LP359.316 | LP359.315 | LP359.315 | LP359.315 |
| 936355.7  | 376489    | 396945.6  | 952689.9  | 858568.1  | 452210.7  | 406627.9  | 416125.2  | 288539.1  | 584614    |
| 967751.7  | 284068.8  | 409083.6  | 845191.1  | 950925.3  | 502992.8  | 579074.3  | 485168.9  | 389284.9  | 423407.3  |
| 901273.6  | 522077.4  | 355818.2  | 761237.5  | 614952.6  | 529180.5  | 539498.6  | 557124.1  | 293033.3  | 616053.5  |
| 725859.8  | 362831.2  | 419314.3  | 707749.1  | 743609.6  | 444049.8  | 419403.7  | 449245.7  | 245559.9  | 569112.8  |
| 915743.6  | 382935.6  | 378886.8  | 765183.4  | 1147713   | 431077    | 437322.2  | 498086.1  | 475772.3  | 614310.6  |

|           |           |           |           |           |           |           |           |           |           |
|-----------|-----------|-----------|-----------|-----------|-----------|-----------|-----------|-----------|-----------|
| LP359.315 | LP359.316 | LP359.316 | LP359.315 | LP359.316 | LP359.315 | LP359.315 | LP359.315 | LP359.316 | LP359.315 |
| 328256.9  | 475094.2  | 359985.3  | 443415.2  | 257165.4  | 291198.8  | 390894.4  | 420152.6  | 161819.3  | 378995.9  |
| 393777.8  | 645630.8  | 341386    | 434424.3  | 285892.7  | 220023.6  | 344509.8  | 514682    | 238379.3  | 387117.8  |
| 280173.3  | 717087.9  | 380857.1  | 345962.1  | 266438    | 273689.2  | 471844.2  | 436452.3  | 259191.9  | 307173.6  |
| 237562.8  | 502607.3  | 430947.7  | 357673.1  | 273178.7  | 295232.1  | 418108.1  | 459426.2  | 246425.9  | 327798.6  |
| 217488.4  | 388333.3  | 356759    | 567516.5  | 270685.8  | 272365    | 308774.4  | 464819.9  | 233042.9  | 462570    |

|           |           |           |           |           |           |           |           |           |           |
|-----------|-----------|-----------|-----------|-----------|-----------|-----------|-----------|-----------|-----------|
| LP359.316 | LP359.316 | LP359.315 | LP359.315 | LP359.315 | LP359.316 | LP359.315 | LP359.315 | LP359.315 | LP359.316 |
| 307163.4  | 362518    | 336993.9  | 249985.2  | 195756.1  | 247026.9  | 177271.7  | 243167.6  | 260225.9  | 275466.4  |
| 348533.6  | 539710.1  | 350797.1  | 244413.5  | 189906.4  | 259942.4  | 168646.2  | 279705.9  | 265649.5  | 327667.3  |
| 287397.1  | 472238.8  | 339539.8  | 297555.4  | 219778    | 260852.2  | 215308.8  | 257573.6  | 341094.4  | 255345.9  |
| 349460.6  | 345619.2  | 324497.7  | 218306.2  | 214194.8  | 268064.4  | 179749    | 232996.3  | 239649.8  | 318337.8  |
| 271601.1  | 546183.7  | 322397.4  | 208694.1  | 243354.3  | 239757.2  | 183377.7  | 231247.9  | 229293.1  | 298512.9  |

|           |           |           |           |           |           |           |           |           |           |           |
|-----------|-----------|-----------|-----------|-----------|-----------|-----------|-----------|-----------|-----------|-----------|
| LP359.316 | LP359.316 | LP359.315 |
| 465306.8  | 220583.6  | 190066.8  | 246476    | 253877.1  | 255926.9  | 179665    | 215788.2  | 260568.8  | 223622.5  |           |
| 360943.3  | 251479.9  | 207501.8  | 277501.1  | 260224.2  | 272927.8  | 242078.7  | 215827.5  | 267287.2  | 229845.4  |           |
| 365517.5  | 303932    | 189196.4  | 230904.2  | 245836.1  | 272300.8  | 239103    | 221819.8  | 288338.6  | 231111.8  |           |
| 347670.9  | 249696.8  | 176312.5  | 238524.7  | 237441.7  | 235658.8  | 236065.7  | 211525.2  | 270494.6  | 219032.5  |           |
| 341342.6  | 237859    | 176660.5  | 243049.2  | 247747    | 236952.5  | 248394.7  | 195772.7  | 262540.9  | 212239.2  |           |

|           |           |           |           |           |           |           |           |           |           |
|-----------|-----------|-----------|-----------|-----------|-----------|-----------|-----------|-----------|-----------|
| LP359.316 | LP360.237 | LP360.238 |
| 186955.6  | 72197.17  | 79687.33  | 65476.55  | 74413.43  | 87495.81  | 89705.17  | 80470.92  | 69326.81  | 61605.16  |
| 184960.2  | 77198.73  | 66022.83  | 75113.65  | 63763.66  | 92434.57  | 69168.1   | 71052.96  | 64639.29  | 67021.18  |
| 237419.8  | 73646.79  | 80447.01  | 97415.61  | 73930.23  | 85303.24  | 65179.56  | 73766.17  | 61833.14  | 59040.17  |
| 183268.1  | 71934.8   | 77311.19  | 57395.18  | 70577.47  | 80933.52  | 66299.2   | 71715.57  | 74258.25  | 72840.02  |
| 172731.8  | 69833.28  | 74337.3   | 64327.47  | 69112.99  | 87849.16  | 71044.2   | 83224.21  | 60111.47  | 72514.5   |

|           |           |           |           |           |           |           |           |           |           |
|-----------|-----------|-----------|-----------|-----------|-----------|-----------|-----------|-----------|-----------|
| LP360.238 |
| 91509.21  | 67455.13  | 66911.72  | 61329.79  | 67648.29  | 68826.17  | 91760.36  | 77638.56  | 55600.36  | 48933.02  |
| 88458.75  | 67978.7   | 62425.6   | 63237.46  | 81005.23  | 65773.91  | 86055.16  | 83064.28  | 63301.92  | 48532.08  |
| 90124.82  | 58542.14  | 69332.1   | 64472.25  | 69055.2   | 61702.58  | 84648.72  | 80786.44  | 55058.33  | 45651.87  |
| 91687.33  | 63844.6   | 72204.55  | 65587.96  | 71039.7   | 64147.37  | 82113.19  | 79671.12  | 53599.58  | 49818.25  |
| 75123.01  | 56944.36  | 70634.31  | 64442.12  | 73144.31  | 64797.66  | 83835.17  | 77684.91  | 59741.51  | 46784.9   |

|           |           |           |           |           |           |           |           |           |           |
|-----------|-----------|-----------|-----------|-----------|-----------|-----------|-----------|-----------|-----------|
| LP360.238 |
| 62823.06  | 66933.46  | 66307.34  | 63832.27  | 48162.05  | 55595.23  | 54670.06  | 68193.44  | 74106.38  | 64968.53  |
| 61999.98  | 74884.96  | 64638.77  | 58895.42  | 50140.04  | 63294.26  | 55588.08  | 65554.15  | 65784.6   | 64198.44  |
| 63334.33  | 70398.87  | 57965.36  | 58190.01  | 52175.68  | 58659.7   | 48732.16  | 75034.75  | 68693.74  | 61432.65  |
| 69197.1   | 76237.4   | 62783.49  | 59290.55  | 45234.82  | 55697.72  | 52763.94  | 62414.58  | 73066.28  | 65554.45  |
| 62815.95  | 74586.37  | 64213.97  | 59724.53  | 50070.49  | 55748.55  | 53741.52  | 68049.86  | 70953.19  | 62745.27  |

|            |            |            |            |            |            |            |            |            |            |
|------------|------------|------------|------------|------------|------------|------------|------------|------------|------------|
| LP360.238: | LP360.238: | LP360.239: | LP360.238: |
| 56255.43   | 68476.38   | 58584.81   | 59559.1    | 59730.54   | 65147.09   | 70516.77   | 54242.43   | 82773.6    | 67260.07   |
| 62329.02   | 70876.2    | 58470.98   | 56840.09   | 69087.46   | 72006.25   | 72951.06   | 45509.33   | 86142.56   | 70898.68   |
| 57684.44   | 74223.03   | 63474.18   | 55675.29   | 61392.82   | 64561.56   | 75921.56   | 51979.39   | 81306.77   | 73549.85   |
| 56296.16   | 73449.07   | 60350.34   | 61369.5    | 63651.38   | 68956.63   | 63561.88   | 64760.54   | 81640.54   | 67419.24   |
| 52635.76   | 71406.71   | 55638.21   | 66151.8    | 55904.83   | 63170.53   | 66885.1    | 56638.29   | 82001.7    | 75087.27   |



|           |           |           |           |           |           |           |           |           |           |
|-----------|-----------|-----------|-----------|-----------|-----------|-----------|-----------|-----------|-----------|
| LP360.238 | LP360.238 | LP360.274 |
| 72057.74  | 51329.75  | 69139.66  | 188062.2  | 82122.9   | 80028.26  | 63884.5   | 60589.65  | 62671.81  | 58477.02  |
| 77037.65  | 49557.47  | 82943.58  | 205515.3  | 84630.6   | 75335.73  | 53816.27  | 84136.47  | 73459.68  | 64237.26  |
| 83504.53  | 52981.94  | 80149.68  | 216745.5  | 83036.89  | 72852.27  | 56995.94  | 81907.13  | 75465.87  | 60891.4   |
| 75574.72  | 48275.44  | 71649.15  | 218780.2  | 81818.71  | 63832.09  | 79871.56  | 80293.47  | 66442.06  | 60414.99  |
| 76197.04  | 49081.85  | 91815.85  | 221180.5  | 98959.1   | 75729.24  | 60042.57  | 82047.32  | 65912.26  | 53333.48  |

|           |           |           |           |           |           |           |           |           |           |
|-----------|-----------|-----------|-----------|-----------|-----------|-----------|-----------|-----------|-----------|
| LP360.274 |
| 180161.6  | 75836.63  | 70660.59  | 170860.9  | 154281.7  | 69535.44  | 55184.06  | 51174.75  | 83468.94  | 76130.31  |
| 184541    | 75179.76  | 70323.84  | 180053.3  | 156119.8  | 66950.39  | 54611.45  | 52425.28  | 92618.59  | 72318.96  |
| 192383.7  | 72284.17  | 70696.43  | 190215.4  | 166181.5  | 70171.95  | 55267.95  | 52841.19  | 83473.07  | 74653.23  |
| 183290.2  | 69350.71  | 63078.47  | 212281.2  | 151860.4  | 70208.09  | 57412.64  | 55113     | 77242.89  | 74955.69  |
| 181761.6  | 70214.6   | 69729.58  | 192530.6  | 104343.8  | 56280.7   | 56751.83  | 54575.52  | 67921.53  | 63168.25  |

|           |           |           |           |           |           |           |           |           |           |
|-----------|-----------|-----------|-----------|-----------|-----------|-----------|-----------|-----------|-----------|
| LP360.274 |
| 60435.52  | 75244.59  | 92871.68  | 61942.25  | 86570.57  | 121136.4  | 85560.53  | 74930.61  | 53257.74  | 59399.07  |
| 57119.39  | 72567.7   | 94933.16  | 71886.43  | 83194.73  | 119940.9  | 108150.9  | 71884.73  | 59697.78  | 61877.63  |
| 57188.95  | 73601.02  | 105006.1  | 68899.4   | 86375.8   | 124706.2  | 108136.9  | 72329.85  | 54709.29  | 61772.14  |
| 57379.17  | 76639.88  | 95984.33  | 67753.39  | 84267.12  | 111820.7  | 103124.7  | 77863.46  | 55524.1   | 58649.17  |
| 58775.62  | 69319.09  | 86170.5   | 58580.46  | 77022.18  | 86224.9   | 100359.2  | 75370.29  | 59449.44  | 62272.1   |

|            |            |            |            |            |            |            |            |            |            |
|------------|------------|------------|------------|------------|------------|------------|------------|------------|------------|
| LP360.274! |
| 127750     | 85276.06   | 212954.9   | 81468.27   | 64153.57   | 92166.66   | 77049.98   | 48303.64   | 184732.2   | 202276     |
| 131734.1   | 90161.7    | 209562.3   | 77204.53   | 61478.72   | 81989.33   | 89915.04   | 51022.26   | 187427     | 207707.4   |
| 124716.7   | 88314.43   | 227355.7   | 84081.67   | 61463.21   | 76440.54   | 90166.58   | 48441.29   | 204190.8   | 209499.4   |
| 131184.8   | 80752.52   | 228775.7   | 76972.4    | 60244.24   | 84606.56   | 83976.66   | 54657.68   | 184749     | 202257.2   |
| 81815.62   | 79938.61   | 213071.2   | 83064.16   | 59861.92   | 81312.13   | 71274.39   | 56969.96   | 192106     | 208600.1   |

|           |           |           |           |           |           |           |           |           |           |
|-----------|-----------|-----------|-----------|-----------|-----------|-----------|-----------|-----------|-----------|
| LP360.274 | LP360.274 | LP360.274 | LP360.274 | LP360.274 | LP360.274 | LP360.310 | LP360.310 | LP360.319 | LP360.319 |
| 71081.19  | 57265.77  | 76888.74  | 299455.4  | 39193.98  | 57036.74  | 84711.04  | 239794.5  | 189508    | 157673.5  |
| 65914.84  | 50901.19  | 72072.09  | 315022.7  | 46191.2   | 56445.61  | 96249.37  | 248279.9  | 195203.6  | 154644.8  |
| 70152.12  | 53616.76  | 80643.9   | 308858.8  | 40511.43  | 59368.47  | 89027.91  | 280558.3  | 179134.9  | 167764.6  |
| 69042.05  | 56515.04  | 78940.63  | 307099.1  | 40152.76  | 56465.19  | 76499.56  | 226972.2  | 177475.2  | 150676.4  |
| 58801.78  | 53426.93  | 80259.35  | 308375.9  | 42698.47  | 51163.29  | 71763.86  | 302497.4  | 221839.6  | 183750.7  |

|           |           |           |           |           |           |           |           |           |           |
|-----------|-----------|-----------|-----------|-----------|-----------|-----------|-----------|-----------|-----------|
| LP360.319 | LP360.318 | LP360.319 | LP360.319 | LP360.32_ | LP360.320 | LP360.320 | LP360.319 | LP360.319 | LP360.320 |
| 238583    | 199288.1  | 135022.7  | 130707.4  | 99278.14  | 77264.21  | 67588.73  | 66105.22  | 102233.4  | 85714.31  |
| 246225    | 212874.3  | 138968.1  | 123661.4  | 101408.8  | 79762.98  | 71809.36  | 70379.75  | 94973.1   | 85750.46  |
| 240778    | 215800.1  | 140084.1  | 122834.3  | 112539.8  | 81137.21  | 65671.45  | 77112.22  | 102812.2  | 88854.66  |
| 263691.6  | 173374.2  | 165902.4  | 126281.7  | 101996.5  | 84998.34  | 70430.9   | 60471.45  | 100761    | 77956.69  |
| 307940.2  | 233153.1  | 130016.7  | 122547.5  | 89467.25  | 80652.63  | 71310.51  | 68124.03  | 87991.54  | 83905.73  |

|           |           |           |           |           |           |           |           |           |           |
|-----------|-----------|-----------|-----------|-----------|-----------|-----------|-----------|-----------|-----------|
| LP360.319 | LP360.319 | LP360.32_ | LP360.320 | LP360.319 | LP360.320 | LP360.319 | LP360.320 | LP360.319 | LP360.319 |
| 51774.96  | 60061.51  | 83830.41  | 78043.75  | 71947.25  | 137676.4  | 93354.42  | 70910.75  | 101069.8  | 59012.23  |
| 51485.76  | 58367.15  | 77620.21  | 76449.13  | 70076.67  | 167169    | 98474.89  | 81364.39  | 96308.08  | 63074.19  |
| 52153.37  | 57156.24  | 80910.89  | 78737.88  | 77719.55  | 145848.2  | 93929.15  | 78669.7   | 97663.4   | 61716.05  |
| 52844.51  | 62265.44  | 71723.72  | 77886.69  | 81785.14  | 156992.9  | 94223.85  | 66496.64  | 97607.75  | 58985.74  |
| 49418.5   | 54203.45  | 82653.35  | 81387.53  | 69307.8   | 120529.1  | 88701.25  | 70910.36  | 82854.02  | 57739.27  |

|           |           |           |           |           |           |           |           |           |           |
|-----------|-----------|-----------|-----------|-----------|-----------|-----------|-----------|-----------|-----------|
| LP360.320 | LP360.323 | LP360.324 | LP360.324 | LP360.324 | LP360.347 | LP360.347 | LP361.168 | LP361.168 | LP361.168 |
| 49970.43  | 2026264   | 245874.8  | 208441.9  | 224933.4  | 205782.1  | 211867.6  | 527906.3  | 367047.5  | 217216.6  |
| 58510.64  | 1812875   | 239114.4  | 198862.1  | 247195.6  | 212715    | 206270.3  | 524799.7  | 351565    | 214529.4  |
| 52230.28  | 1708439   | 234137.3  | 193060    | 230324.6  | 199087.1  | 206971    | 492206.6  | 331057.8  | 181268    |
| 45697.57  | 1542077   | 225248.1  | 322198    | 295047.1  | 188894.3  | 210377.7  | 463135.5  | 313411.4  | 175713.5  |
| 47667.1   | 1871448   | 251820.8  | 151242.7  | 215681.7  | 186245.3  | 216213.7  | 445361.9  | 300589.2  | 174086.6  |



|           |           |           |           |           |           |           |           |           |           |
|-----------|-----------|-----------|-----------|-----------|-----------|-----------|-----------|-----------|-----------|
| LP361.184 | LP361.222 |
| 101463.3  | 620866.8  | 716082.9  | 576661.4  | 644428    | 567739    | 408453.4  | 651745.5  | 682907.4  | 609654.7  |
| 950508.2  | 611735.8  | 734821    | 559419.1  | 633386.6  | 506780.1  | 392740.6  | 656276.9  | 689243.6  | 621919.4  |
| 1019792   | 639488.5  | 737173.2  | 596910.5  | 657567.9  | 597203.1  | 426937.1  | 617539.3  | 710540.1  | 596080.6  |
| 992779.3  | 587273.8  | 681705.7  | 592024.3  | 609034.6  | 569146.1  | 417634.7  | 650186.9  | 698583    | 650615.6  |
| 1043015   | 575772.2  | 674331    | 626486.9  | 630366.6  | 555237.6  | 434247.4  | 609286.4  | 686929.4  | 616341.4  |

|           |           |           |           |           |           |           |           |           |           |
|-----------|-----------|-----------|-----------|-----------|-----------|-----------|-----------|-----------|-----------|
| LP361.222 |
| 1065358   | 979957.1  | 733678.6  | 399928.2  | 663702.5  | 341585.5  | 321872.9  | 324738.7  | 396604.2  | 473547.4  |
| 1135037   | 1015832   | 792928.4  | 441184.1  | 695251.6  | 281239.9  | 336776.6  | 324423.9  | 381801.3  | 471671.4  |
| 1165990   | 1033214   | 792093    | 405621.7  | 727887.7  | 336096    | 327527.7  | 338131.4  | 361170.3  | 462217.1  |
| 1196852   | 1064708   | 727918.2  | 455056.2  | 675065.4  | 332137.3  | 307802.4  | 348921.9  | 361243.6  | 464779.4  |
| 1181660   | 1065961   | 748170.3  | 453847.6  | 694969.1  | 342312.6  | 338061.7  | 309927.5  | 381920.2  | 456366.9  |

|           |           |           |           |           |           |           |           |           |           |
|-----------|-----------|-----------|-----------|-----------|-----------|-----------|-----------|-----------|-----------|
| LP361.222 |
| 225617.9  | 586571.2  | 391731.9  | 314062.1  | 301579.1  | 326922.3  | 336450    | 124037.1  | 402505.6  | 359543.8  |
| 236705.5  | 584218.8  | 420533.3  | 330717.5  | 313629.9  | 329984.1  | 318619.2  | 123541    | 359014.3  | 340956.3  |
| 232057.1  | 608996.5  | 415461.1  | 348712.3  | 293173.8  | 312923    | 349310.9  | 130985.5  | 380215.4  | 351424    |
| 233604.3  | 634557.7  | 388045.8  | 328102.3  | 302448.2  | 334402.9  | 334094.4  | 124204.1  | 374765.9  | 349057    |
| 241120.5  | 627352.8  | 386967.8  | 329932.3  | 297112.5  | 304869.4  | 349101    | 128190.2  | 388052.7  | 343627.5  |

|           |           |           |           |           |           |           |           |           |           |
|-----------|-----------|-----------|-----------|-----------|-----------|-----------|-----------|-----------|-----------|
| LP361.222 |
| 366362.1  | 339010.7  | 268489.8  | 77027.99  | 337449.2  | 802355.2  | 365090.8  | 927896.2  | 1055870   | 919856.6  |
| 357151.1  | 332276.2  | 252168.4  | 76649.49  | 368648.6  | 804814.3  | 407529.8  | 893334.8  | 1058513   | 836825    |
| 383377.6  | 336142.6  | 260621.9  | 75149.89  | 354092    | 832922.8  | 407380.8  | 966804.6  | 1062366   | 913944.4  |
| 349055.2  | 333074.9  | 269278.4  | 67978.89  | 339900.5  | 786589.9  | 379056    | 1006508   | 1034341   | 850549.9  |
| 343960.4  | 305926.6  | 261094.6  | 80237.57  | 336790.2  | 850268.8  | 388072.2  | 1046785   | 1052646   | 1025837   |

|           |           |           |           |           |           |           |           |           |           |
|-----------|-----------|-----------|-----------|-----------|-----------|-----------|-----------|-----------|-----------|
| LP361.222 |
| 779141.5  | 465466.4  | 925109.7  | 1193030   | 425568.7  | 652988.4  | 732054.9  | 711398.2  | 705102.6  | 831293.8  |
| 767643.1  | 458854    | 926357.1  | 1055403   | 420633.9  | 658900    | 672890.5  | 693826.7  | 724371.7  | 821589.6  |
| 741693.7  | 471007.3  | 947404.6  | 1168391   | 414881.1  | 673122.2  | 718608.2  | 703911.7  | 728657.4  | 811761.2  |
| 778827.4  | 486814.4  | 970352.6  | 1278691   | 449586.6  | 679025.8  | 750110.6  | 723974.7  | 739645    | 856827    |
| 771521.2  | 495762.7  | 1031407   | 1247545   | 452361.3  | 687279    | 734380.2  | 734537.4  | 809368.4  | 799235.7  |

|           |           |           |           |           |           |           |           |           |           |
|-----------|-----------|-----------|-----------|-----------|-----------|-----------|-----------|-----------|-----------|
| LP361.222 |
| 867201.7  | 568324    | 589247.3  | 447448.1  | 534527    | 329984.6  | 503060.8  | 83275.22  | 495768.9  | 323497    |
| 898244.3  | 555955.7  | 605663.8  | 451998.2  | 587522.3  | 332638.9  | 506170.7  | 75560.61  | 551468.3  | 364474.7  |
| 971378.2  | 595284.7  | 640874.8  | 432743.8  | 624160.5  | 350966.8  | 549953.9  | 72421.55  | 556180    | 354827.9  |
| 1031456   | 618360.8  | 581697.3  | 498171.7  | 621772.1  | 337089.9  | 560021.6  | 66154.43  | 581088.5  | 361121.6  |
| 973920.8  | 632045.2  | 594654.3  | 493915.9  | 591620.5  | 343624.5  | 559824.8  | 68347.54  | 567889.5  | 355193.1  |

|           |           |           |           |           |           |           |           |           |           |           |
|-----------|-----------|-----------|-----------|-----------|-----------|-----------|-----------|-----------|-----------|-----------|
| LP361.222 |
| 768685.4  | 397121.2  | 643822.3  | 448129.1  | 225701.5  | 402839.6  | 359176.4  | 365653.9  | 775624.6  | 384857    |           |
| 808630.7  | 368324.8  | 649272.8  | 430639    | 224434.9  | 392054.2  | 345738.6  | 399049.6  | 798827.1  | 385616    |           |
| 753486.6  | 371486.4  | 668731.5  | 451679.3  | 227341.6  | 452203.5  | 361900.5  | 372574.4  | 807007.7  | 380612.2  |           |
| 761757    | 355720.9  | 698781.7  | 464697.6  | 232653.7  | 412428.9  | 368640.3  | 406764    | 784535.2  | 382344.6  |           |
| 781808.2  | 358433.4  | 717856.9  | 453691.6  | 223007.1  | 400280.1  | 355677.6  | 426282.8  | 796610.5  | 381318.8  |           |

|           |           |           |           |           |           |           |           |           |           |
|-----------|-----------|-----------|-----------|-----------|-----------|-----------|-----------|-----------|-----------|
| LP361.222 | LP361.270 | LP361.332 | LP362.226 | LP362.226 | LP362.226 | LP362.227 | LP362.226 | LP362.226 | LP362.226 |
| 485468    | 26148.94  | 16385.89  | 148152.4  | 221588.9  | 150886.7  | 93533.48  | 130147.2  | 223979.9  | 253950.5  |
| 499922.4  | 26876.8   | 14298.44  | 160360    | 225338.5  | 127994.5  | 84572.25  | 128704.3  | 205845.8  | 241196.1  |
| 493112.2  | 31325.03  | 15619.32  | 153276.8  | 207509.9  | 126250.2  | 89691.44  | 131266    | 213442.9  | 224898.4  |
| 505560    | 26907.88  | 14088.22  | 147635.3  | 225337.4  | 133145.6  | 90551.04  | 131979.7  | 226903.6  | 258047.7  |
| 501955.8  | 27797.83  | 13501.29  | 238372.1  | 227989.6  | 133820.5  | 90254.44  | 131453.7  | 233949.6  | 242153    |



|           |           |           |           |           |           |           |           |           |           |
|-----------|-----------|-----------|-----------|-----------|-----------|-----------|-----------|-----------|-----------|
| LP362.227 | LP362.226 | LP362.227 | LP362.227 | LP362.226 | LP362.226 | LP362.226 | LP362.227 | LP362.253 | LP362.253 |
| 250277.8  | 172314.3  | 145100.3  | 75080.58  | 97556.55  | 99388.44  | 134175.5  | 121031.6  | 136272.2  | 122293.4  |
| 264398.5  | 189981.4  | 136358.2  | 70269.61  | 93587.15  | 102503.8  | 137491.5  | 124638.4  | 162882.3  | 103334.6  |
| 258609.1  | 189520.9  | 136137.4  | 69256.94  | 103645.5  | 86901.11  | 125281.1  | 126945.5  | 180155.6  | 157560.7  |
| 259847.5  | 178374.9  | 134332.9  | 66405.83  | 89326.09  | 89936.14  | 132549.2  | 117811.2  | 128334.8  | 131346.1  |
| 247023.1  | 179919.6  | 145770.8  | 66788.84  | 89659.02  | 96956.12  | 137945.4  | 125790.9  | 161441    | 119928    |

|            |            |            |            |            |           |           |            |            |           |
|------------|------------|------------|------------|------------|-----------|-----------|------------|------------|-----------|
| LP362.253! | LP362.253! | LP362.253! | LP362.253! | LP362.253! | LP362.254 | LP362.254 | LP362.253! | LP362.253! | LP362.254 |
| 151974.6   | 124533.3   | 151307.8   | 162629.6   | 200340.5   | 189111.3  | 142866.3  | 148446.5   | 127089.7   | 155570.1  |
| 135797.7   | 113594.3   | 163604.6   | 140422.1   | 202116     | 178439.9  | 157401.9  | 103870.7   | 138382.3   | 136766.9  |
| 202164.3   | 109536.7   | 144241.1   | 229331.3   | 148011.4   | 146241.6  | 143292.7  | 124753.2   | 150851.1   | 122320.4  |
| 111716.8   | 175742.2   | 166200.1   | 135961.1   | 172714.7   | 167568    | 240334.8  | 103052.6   | 149722.4   | 102959.2  |
| 152720.2   | 105609.1   | 148076.2   | 208788.6   | 164532     | 141935.8  | 164573.7  | 154193.3   | 125905.5   | 134468.1  |

|           |           |           |           |           |           |           |           |           |           |
|-----------|-----------|-----------|-----------|-----------|-----------|-----------|-----------|-----------|-----------|
| LP362.254 | LP362.253 | LP362.253 | LP362.254 | LP362.254 | LP362.253 | LP362.253 | LP362.254 | LP362.254 | LP362.254 |
| 145704.9  | 110526.5  | 175951.4  | 106224.8  | 116424.3  | 122041.6  | 101585.9  | 135894.4  | 143286.9  | 89644.13  |
| 138483.7  | 101460.4  | 169978.2  | 103096.9  | 117015.1  | 125692.9  | 107022.6  | 142783.3  | 153092.7  | 120513.7  |
| 159861.9  | 105320.3  | 158152.2  | 197965.6  | 141763.3  | 133573.9  | 112224.2  | 138737.1  | 140632.9  | 122298.7  |
| 115984    | 142919.4  | 162527.8  | 117508.4  | 117671.9  | 120396.1  | 128229.2  | 108684.6  | 142314.6  | 90441.33  |
| 142380.8  | 102723.7  | 171048.5  | 116366.4  | 106062.9  | 121391.9  | 104450.4  | 149026.9  | 146195.2  | 83838.71  |

|           |           |           |           |           |           |           |           |           |           |
|-----------|-----------|-----------|-----------|-----------|-----------|-----------|-----------|-----------|-----------|
| LP362.253 | LP362.254 | LP362.254 | LP362.253 | LP362.254 | LP362.253 | LP362.254 | LP362.254 | LP362.254 | LP362.254 |
| 123436.2  | 104230.4  | 97709.73  | 137943    | 112862.4  | 108168.4  | 110458.6  | 118102.8  | 89794.65  | 147282.2  |
| 205361    | 107012.9  | 93615.83  | 143374.9  | 112491.2  | 110608.9  | 103708.2  | 121439.7  | 94040.34  | 169496.3  |
| 144738.5  | 103498.9  | 111210.2  | 153293.8  | 117375.1  | 96873.52  | 150139.5  | 109349.3  | 87288.8   | 155374.5  |
| 109265.6  | 108233.8  | 101566.9  | 146093.8  | 129495.3  | 102894    | 115814.3  | 104701.8  | 99632.08  | 155374.4  |
| 111343    | 104431.8  | 105749.7  | 140747.8  | 94632.48  | 90850.35  | 97176.24  | 113124.5  | 102372.7  | 138111    |

|           |           |           |           |           |           |           |           |           |           |
|-----------|-----------|-----------|-----------|-----------|-----------|-----------|-----------|-----------|-----------|
| LP362.253 | LP362.253 | LP362.254 | LP362.254 | LP362.254 | LP362.254 | LP362.253 | LP362.254 | LP362.254 | LP362.254 |
| 115914.4  | 96133.44  | 125275.9  | 98698.91  | 90360.1   | 114287.4  | 86184.2   | 97125.28  | 132087.6  | 124939.5  |
| 128064.9  | 89991.1   | 120247.3  | 101272.2  | 93275.15  | 119470.1  | 90514.66  | 81948.55  | 129036.4  | 127268.8  |
| 121785.9  | 108960.8  | 122697    | 114490.4  | 98983.82  | 102936    | 98212.91  | 132352.6  | 133111    | 120081.1  |
| 113004.9  | 97406.01  | 128807.5  | 106094.6  | 115430.6  | 145159.3  | 145329.8  | 93660.42  | 115943.3  | 128097.4  |
| 167869.2  | 93637.59  | 136214.5  | 105813.8  | 92851.73  | 112136.2  | 81659.05  | 94503.83  | 125596.9  | 128828.3  |

|            |           |           |           |            |           |            |            |            |           |
|------------|-----------|-----------|-----------|------------|-----------|------------|------------|------------|-----------|
| LP362.253! | LP362.254 | LP362.254 | LP362.254 | LP362.253! | LP362.254 | LP362.253! | LP362.254! | LP362.254! | LP362.254 |
| 167586.7   | 119845.6  | 133969.9  | 100787.9  | 79152.42   | 126552.3  | 95087.41   | 131228.6   | 166769.7   | 86963.93  |
| 157892.7   | 122349.1  | 120470.6  | 94746.39  | 83352.63   | 122040.5  | 99663.39   | 128829.8   | 158684.9   | 95664.87  |
| 191565.2   | 110555.5  | 120536.4  | 88017.19  | 90781.07   | 153765.4  | 122171     | 131043.5   | 163096.4   | 88217.81  |
| 180329.4   | 125459.3  | 130381.1  | 98804.21  | 107126.7   | 126852.4  | 103234.1   | 151155.6   | 159672.3   | 117370.8  |
| 166725.8   | 122188.3  | 130625.4  | 96121.52  | 84710.91   | 119111.8  | 87547.28   | 136686.8   | 165322.7   | 96950.43  |

|           |           |           |           |           |           |           |           |           |           |
|-----------|-----------|-----------|-----------|-----------|-----------|-----------|-----------|-----------|-----------|
| LP362.254 | LP362.254 | LP362.254 | LP362.253 | LP362.253 | LP362.254 | LP362.290 | LP362.290 | LP362.290 | LP362.290 |
| 142839.3  | 220419.2  | 161649.1  | 138960.9  | 57483.95  | 82881.49  | 89014.44  | 112375.1  | 84771.41  | 95177.77  |
| 160251.3  | 221788.1  | 154194.1  | 141225    | 60567.9   | 68371.26  | 82933.43  | 120559    | 80347.6   | 91118.84  |
| 147626.2  | 218655.4  | 173512    | 156766.3  | 67931.7   | 77277.07  | 80309.17  | 112459    | 82116.1   | 89325.1   |
| 130226    | 223063.9  | 148666    | 143216.9  | 59620.34  | 76788.67  | 82562.94  | 113526.5  | 76723.18  | 92709.2   |
| 172171.7  | 214651.9  | 150286.4  | 136278.8  | 56458.63  | 71891.46  | 82224.22  | 118174    | 78959.62  | 77120.52  |

|           |           |           |           |           |           |           |           |           |           |
|-----------|-----------|-----------|-----------|-----------|-----------|-----------|-----------|-----------|-----------|
| LP362.290 |
| 116353.6  | 78743.76  | 123969.6  | 106703.8  | 89261.48  | 165731.7  | 114730.5  | 137991.5  | 106442.6  | 191512    |
| 112099.1  | 79107.22  | 127680.2  | 98809.43  | 76038.25  | 157238.3  | 123490.2  | 131814    | 112375.7  | 186131.7  |
| 117888.1  | 83685.84  | 119470.2  | 101353.6  | 83074.44  | 150091.9  | 120420.2  | 130105.8  | 95267.11  | 181756.9  |
| 116651.6  | 74324.56  | 124132.7  | 88647.9   | 80970.9   | 150557.2  | 109241.2  | 133793.6  | 96991.4   | 206947.3  |
| 120377.5  | 80385.36  | 118273.2  | 96204.09  | 85232.2   | 144529.5  | 109430.9  | 129491.5  | 118684.5  | 193246    |



|           |           |           |           |           |           |           |           |           |           |
|-----------|-----------|-----------|-----------|-----------|-----------|-----------|-----------|-----------|-----------|
| LP362.290 | LP362.290 | LP362.290 | LP362.324 | LP362.339 | LP362.339 | LP362.926 | LP363.111 | LP363.182 | LP363.289 |
| 75438.57  | 112883.2  | 203556.7  | 105537.6  | 139410.5  | 146598    | 21438.44  | 16153.54  | 160973.7  | 42127.74  |
| 76089.18  | 113301.8  | 197728.5  | 101477.2  | 142622.9  | 136801.8  | 20728.11  | 19525.42  | 139228.2  | 33571.58  |
| 77818.84  | 109749.8  | 191679.7  | 96069.13  | 154300.2  | 137317.6  | 16304.65  | 17743.71  | 123740    | 34733.34  |
| 81244.36  | 114299.7  | 207249.2  | 96962.8   | 149949.9  | 136090.4  | 17126.64  | 15514.02  | 138766.4  | 36603.25  |
| 80564.39  | 108470.1  | 204475    | 94721.01  | 152278.2  | 129987.2  | 16786.39  | 20528.95  | 142568    | 40112.22  |

|           |           |           |           |           |           |           |           |           |           |
|-----------|-----------|-----------|-----------|-----------|-----------|-----------|-----------|-----------|-----------|
| LP363.288 | LP363.288 | LP363.289 | LP363.288 | LP363.288 | LP363.310 | LP363.326 | LP363.326 | LP363.343 | LP364.185 |
| 44257.26  | 54303.57  | 31306.74  | 41556.46  | 37140.49  | 54409.43  | 24040.84  | 36390.28  | 27627.93  | 36651.01  |
| 44630.1   | 66511.71  | 32324.94  | 37895.12  | 32839.96  | 42645.31  | 23224.75  | 33957.26  | 32670.82  | 34939.93  |
| 34686.53  | 50843.7   | 30934.65  | 41771.11  | 38393.67  | 50606.09  | 25488.41  | 40438.43  | 29739.91  | 159886    |
| 43944.33  | 47924.63  | 32146.96  | 45232.61  | 36463.49  | 39626.36  | 23857.52  | 36492.29  | 32929.19  | 140458.7  |
| 46460.4   | 53016.69  | 32407.32  | 44134.48  | 35921.47  | 42360.51  | 20674.85  | 37715.98  | 32508.44  | 137172.5  |

|           |           |           |           |           |           |           |           |           |           |
|-----------|-----------|-----------|-----------|-----------|-----------|-----------|-----------|-----------|-----------|
| LP364.196 | LP364.197 | LP364.197 | LP364.196 | LP364.197 | LP364.196 | LP364.197 | LP364.196 | LP364.196 | LP364.196 |
| 107930.2  | 94341.59  | 106940    | 118380    | 88482.27  | 157261.1  | 80805.36  | 83595.89  | 91715.84  | 93993.68  |
| 106701.8  | 93689.49  | 106479.2  | 108134.8  | 84370.44  | 154393.4  | 78302.88  | 83954.1   | 88899.28  | 98407.18  |
| 102286    | 111278.3  | 98684.38  | 126833.1  | 93962.11  | 164097.4  | 79442.1   | 90418.59  | 93538.71  | 92806.3   |
| 115755.8  | 109844.2  | 108886.4  | 136084    | 91340.07  | 84538.56  | 77460.05  | 92310.05  | 98331.65  | 104585.1  |
| 55165.14  | 60170.7   | 50969.63  | 67390.11  | 59771.84  | 150814.4  | 47420.81  | 44186.89  | 48725.11  | 55894.65  |

|           |           |           |           |           |           |           |           |           |           |
|-----------|-----------|-----------|-----------|-----------|-----------|-----------|-----------|-----------|-----------|
| LP364.196 |
| 134194.9  | 96161.34  | 139880.1  | 109515.3  | 128261.2  | 82018.81  | 111291.4  | 99211.77  | 107012.2  | 141392.2  |
| 124707    | 95534.68  | 141332.7  | 108442.9  | 119384.9  | 89430.95  | 114181.3  | 97600.62  | 104224.1  | 136324.1  |
| 148617.5  | 95257.28  | 141156.1  | 101496.2  | 133894.2  | 92665.2   | 132910.3  | 97019.03  | 115062.7  | 142457.4  |
| 147604.4  | 102146.7  | 148434.8  | 117524.1  | 134558.9  | 96376.45  | 131709.1  | 110694.8  | 116527.8  | 145413.3  |
| 75445.22  | 52913.61  | 69023.29  | 58484.6   | 68278.09  | 45820.43  | 63427.5   | 57984.61  | 57588.52  | 74693.23  |

|           |           |           |           |           |           |           |           |           |           |
|-----------|-----------|-----------|-----------|-----------|-----------|-----------|-----------|-----------|-----------|
| LP364.196 |
| 100152.5  | 102480.7  | 116208.3  | 99605.69  | 77266.95  | 114851.1  | 68439.45  | 79357.22  | 70915.25  | 98469.34  |
| 103289.5  | 113094.6  | 121109.9  | 116310.6  | 80279.15  | 124644.5  | 67508.67  | 72104.21  | 73862.11  | 97503.54  |
| 112213    | 114666.2  | 126385    | 113000.5  | 76356.76  | 138967.5  | 60113.42  | 86341.01  | 68567.18  | 101945.7  |
| 113145.6  | 113443.6  | 126313.5  | 111617    | 92097.54  | 133406.6  | 74378.98  | 83053.13  | 76430.16  | 103936.6  |
| 57830.8   | 65648.84  | 58705.03  | 56382.79  | 43108.58  | 66165.32  | 35815.47  | 40960.19  | 35178.61  | 48030.35  |

|           |           |           |           |           |           |           |           |           |           |
|-----------|-----------|-----------|-----------|-----------|-----------|-----------|-----------|-----------|-----------|
| LP364.196 | LP364.197 | LP364.196 |
| 98818.07  | 118760.2  | 102415.3  | 122378.6  | 126936.8  | 129185.6  | 92851.11  | 71407.45  | 89108.95  | 110961.8  |
| 101371.6  | 136198.4  | 113233.1  | 130905.7  | 118946.3  | 120871.4  | 84406.64  | 75366.29  | 85722.81  | 113180.5  |
| 112537.6  | 131153.3  | 115528.5  | 137907.3  | 130808.7  | 137357.6  | 93365.03  | 76548.48  | 85554.75  | 130059.9  |
| 107786.6  | 138332.3  | 108410.1  | 139393.2  | 139112.5  | 138427.4  | 89087.25  | 76581.42  | 84262.1   | 129615.1  |
| 52394.41  | 68602.18  | 64893.94  | 70792.84  | 74167.06  | 71091.93  | 53085.09  | 46535.8   | 45196.38  | 60111.78  |

|           |           |           |           |           |           |           |           |           |           |
|-----------|-----------|-----------|-----------|-----------|-----------|-----------|-----------|-----------|-----------|
| LP364.197 | LP364.196 | LP364.196 | LP364.196 | LP364.196 | LP364.196 | LP364.233 | LP364.233 | LP364.233 | LP364.233 |
| 139295.7  | 119463.2  | 136598    | 95717.84  | 71813.78  | 147201.7  | 144479.3  | 118213    | 95292.22  | 156019.8  |
| 140373.1  | 111248.2  | 150663.6  | 97509.69  | 70934.98  | 155255    | 131977.4  | 108006.5  | 93595.33  | 141356.3  |
| 136108    | 126886.6  | 157518.3  | 98503.86  | 74018.97  | 153872.2  | 131221.2  | 128234.3  | 106733.9  | 147833.3  |
| 139891.3  | 141657.5  | 142240.6  | 98474.71  | 75002.43  | 146707.2  | 138407.4  | 116326.1  | 118184.3  | 148172.1  |
| 82837.43  | 56531.02  | 70598.57  | 52528.88  | 40733.72  | 152387.2  | 136341.2  | 114829.7  | 107658.5  | 146428.7  |

|           |           |           |           |           |           |           |           |           |           |
|-----------|-----------|-----------|-----------|-----------|-----------|-----------|-----------|-----------|-----------|
| LP364.233 |
| 78390.24  | 163491.7  | 92022.75  | 128188.9  | 103181.1  | 161781.1  | 150194.1  | 118006.1  | 98705.98  | 120351.8  |
| 75447.7   | 161379.4  | 89242.9   | 122671.8  | 103932.6  | 162035.2  | 150628.1  | 105179.7  | 98636.74  | 105586.6  |
| 80104.16  | 162392.6  | 97915.7   | 129601.7  | 95453.44  | 157931.9  | 158673.3  | 112088.5  | 83118.55  | 120413.3  |
| 76370.14  | 162206.6  | 96298.23  | 113748.6  | 98864.37  | 155708.1  | 155857.9  | 109125.3  | 91171.13  | 122836.6  |
| 77555.14  | 161684.2  | 99919.78  | 120728.2  | 100394.2  | 141890.1  | 142570.2  | 95956.49  | 99960.9   | 123300.7  |



|           |           |           |           |           |           |           |           |           |           |
|-----------|-----------|-----------|-----------|-----------|-----------|-----------|-----------|-----------|-----------|
| LP364.233 | LP364.252 | LP364.269 |
| 142523.6  | 184520.1  | 123341.9  | 77431.51  | 159105.1  | 109506.4  | 118989.4  | 75503.52  | 127250.6  | 130828.6  |
| 145532.9  | 150815.5  | 72502.85  | 82670.58  | 153769.7  | 89819.26  | 76675.94  | 82726.72  | 84304.58  | 126736.1  |
| 155962.8  | 151020.1  | 75563.61  | 70101.32  | 142193.5  | 83616.5   | 76307.02  | 73479.8   | 132785.7  | 123584.9  |
| 140274.5  | 151721.1  | 84364.39  | 74657.15  | 136385.5  | 126247.9  | 125488.1  | 83771.8   | 118855.6  | 104301.7  |
| 133828.5  | 163970.2  | 94885.38  | 83200.9   | 208110.4  | 87740.49  | 73993.14  | 70801.46  | 127953.8  | 161940.8  |

|           |           |           |           |           |           |           |           |           |           |
|-----------|-----------|-----------|-----------|-----------|-----------|-----------|-----------|-----------|-----------|
| LP364.269 |
| 105424.6  | 77719.8   | 130744.4  | 104049.5  | 83156.15  | 91816.29  | 106873.1  | 71303.33  | 70963.28  | 75705.3   |
| 98258.22  | 75931.87  | 137810.8  | 104488.8  | 75495.68  | 98722.18  | 100345.5  | 78501.18  | 78251.44  | 63426.33  |
| 71564.4   | 100448.5  | 130167.5  | 102164.9  | 80230.49  | 89510.36  | 106870.7  | 83743.5   | 64939.15  | 96110.84  |
| 75484.12  | 82459.97  | 119564.9  | 139119.6  | 83658.31  | 120719.7  | 99645.72  | 80014.77  | 101323.2  | 66441.53  |
| 74848.94  | 79654.67  | 137258.7  | 93566.96  | 82928.79  | 91288.3   | 98699.58  | 73120.43  | 73072.96  | 74381.7   |

|           |           |           |           |           |           |           |           |           |           |
|-----------|-----------|-----------|-----------|-----------|-----------|-----------|-----------|-----------|-----------|
| LP364.269 |
| 93573.13  | 99808.1   | 63090.18  | 113320.6  | 88950.21  | 67927.69  | 92901.08  | 72018.91  | 92085.12  | 80688.65  |
| 86760.28  | 100748.2  | 57230.12  | 86622.07  | 90447.98  | 69642.94  | 92775.59  | 62654.14  | 87397.85  | 82837.14  |
| 83828.84  | 106989.7  | 58189.43  | 116369.3  | 92129.29  | 67518.81  | 88022.7   | 65953.87  | 91765.28  | 80045.67  |
| 81821.34  | 96643.26  | 53611.26  | 111602.7  | 90849.51  | 71555.15  | 86075.65  | 70201.75  | 86741.19  | 75159.7   |
| 80018.34  | 97073.32  | 65182.45  | 122935.2  | 91431.53  | 60847.5   | 90419.96  | 62594.65  | 86315.58  | 84449.75  |

|           |           |           |           |           |           |           |           |           |           |
|-----------|-----------|-----------|-----------|-----------|-----------|-----------|-----------|-----------|-----------|
| LP364.269 | LP364.270 | LP364.269 |
| 74267.84  | 89776.52  | 99411.33  | 80169.51  | 110526.1  | 74511.01  | 91327.08  | 112918.9  | 86751.22  | 87822.57  |
| 67810.68  | 86898.07  | 104173.6  | 83408.93  | 70528.47  | 75155.49  | 83327.73  | 122791.1  | 93260.24  | 66813.47  |
| 70545.99  | 95530.44  | 101676.4  | 109569.3  | 72728.42  | 86005.32  | 84063.02  | 112437.7  | 92207.59  | 87425.01  |
| 69157.19  | 93038.18  | 105868.8  | 73335.48  | 83854.66  | 69954.56  | 92469.72  | 120087.8  | 92283.73  | 85848.63  |
| 72829.17  | 92628.72  | 99823.51  | 78613.81  | 77727.52  | 66517.55  | 81138.39  | 114973.6  | 88866.11  | 84197.58  |

|           |           |           |           |           |           |           |           |           |           |
|-----------|-----------|-----------|-----------|-----------|-----------|-----------|-----------|-----------|-----------|
| LP364.269 |
| 117077.3  | 93032.85  | 89867.98  | 77412.89  | 83556.5   | 83495.11  | 57404.82  | 68515.66  | 73165.44  | 62264.75  |
| 118353.3  | 87843.6   | 93333.18  | 78851.89  | 91615.72  | 74652.98  | 56430.66  | 72771.61  | 73076     | 64640.94  |
| 109872    | 101695.6  | 96381.82  | 84692.66  | 93515.35  | 77356.18  | 57816.41  | 71802.36  | 72552.82  | 65252.77  |
| 116463.2  | 98529.34  | 95701.03  | 78056.34  | 85361.71  | 78549.04  | 57638.33  | 74506.56  | 75995.66  | 62867.45  |
| 119165.7  | 93086.72  | 89852.25  | 81233.04  | 82371.35  | 73590.56  | 54629.26  | 70923.84  | 62767.04  | 56593.08  |

|           |           |           |           |           |           |           |           |           |           |
|-----------|-----------|-----------|-----------|-----------|-----------|-----------|-----------|-----------|-----------|
| LP364.269 | LP364.284 | LP364.342 |
| 38308.37  | 56537.67  | 86274.42  | 114036.1  | 58586.07  | 83374.32  | 66882.67  | 96948.77  | 15702.5   | 44890.49  |
| 41542.06  | 52595.31  | 86190.72  | 112599    | 63937.99  | 93184.34  | 69825.2   | 98825.19  | 14810.69  | 89331.7   |
| 42218.81  | 51634.95  | 80969.34  | 112559.8  | 66186.44  | 88951.69  | 71149.32  | 99437.8   | 16992.4   | 101327.9  |
| 39461.5   | 50253.45  | 80033.11  | 110422.7  | 57490.49  | 81340.84  | 64577.15  | 102080.3  | 16355.29  | 89774.54  |
| 46248.35  | 49349.42  | 80147.32  | 101347    | 60429.51  | 76427.28  | 59614.19  | 88227.14  | 19464.63  | 91505.41  |

|           |           |           |           |           |           |           |           |           |           |
|-----------|-----------|-----------|-----------|-----------|-----------|-----------|-----------|-----------|-----------|
| LP364.341 | LP364.342 | LP364.357 | LP364.357 | LP364.462 | LP365.255 | LP365.303 | LP365.302 | LP365.305 | LP365.305 |
| 117345.8  | 38924.19  | 87423.82  | 40138.76  | 162009.4  | 58154.13  | 188750.4  | 118955.9  | 55091.96  | 33488.57  |
| 112192.1  | 44113.27  | 86521.24  | 43096.62  | 159821    | 68777.23  | 200478.2  | 126042.3  | 50537.26  | 33062.1   |
| 104242    | 47216.46  | 87512.8   | 38525.24  | 151631.8  | 50499.97  | 182437.8  | 139977.5  | 51801.33  | 30010.8   |
| 105055.1  | 40355.7   | 70718.11  | 39738.93  | 138279.4  | 65584.23  | 174992.9  | 143632.7  | 47303.3   | 30970.7   |
| 95519.02  | 39291.85  | 86098.68  | 29405.13  | 156776.7  | 70109.39  | 176639.8  | 152569.8  | 51982.23  | 30702.44  |

|           |           |           |           |           |           |           |           |           |           |
|-----------|-----------|-----------|-----------|-----------|-----------|-----------|-----------|-----------|-----------|
| LP365.305 | LP365.323 | LP365.341 |
| 31745.84  | 39449.06  | 37177.15  | 38799.71  | 47512.78  | 45295.94  | 42594.18  | 36885.95  | 63620.96  | 84445.9   |
| 36581.98  | 50618.06  | 37008.07  | 46346.99  | 45807.06  | 45786.94  | 40705.27  | 37452.63  | 62116.01  | 76639.05  |
| 41124.39  | 41411.15  | 35904.31  | 39426.7   | 46717.51  | 43426.96  | 43190.6   | 35656.33  | 57311.61  | 106865.8  |
| 31876.76  | 44063.16  | 37043.77  | 39267.19  | 45088.25  | 38829.92  | 40496.64  | 36286.59  | 58108.56  | 70678.21  |
| 32421.59  | 43155.31  | 37696.77  | 46218.42  | 45152.59  | 44079.42  | 39766.9   | 36330.62  | 62000.47  | 76568.1   |



|            |            |           |            |            |            |            |            |            |           |
|------------|------------|-----------|------------|------------|------------|------------|------------|------------|-----------|
| LP366.212! | LP366.211! | LP366.212 | LP366.212! | LP366.212! | LP366.212! | LP366.212! | LP366.212! | LP366.212! | LP366.264 |
| 78042.68   | 51252.01   | 54772.06  | 68539.49   | 44998.13   | 75627.39   | 72048.52   | 61801.91   | 42424.6    | 1605009   |
| 60986.94   | 60242.9    | 58279.17  | 65162.55   | 48721.22   | 78487.8    | 70785.49   | 55238.65   | 42123.21   | 1387815   |
| 77915.08   | 59181.59   | 49602.13  | 60055.25   | 51709.02   | 83071.91   | 69558.93   | 50306.92   | 41988.12   | 2015141   |
| 81903.58   | 55915.1    | 49663.57  | 64198.41   | 49977.01   | 77044.12   | 68906.51   | 58520.38   | 39780.54   | 1670239   |
| 73284.69   | 50351.88   | 50291.18  | 62411.42   | 46816.19   | 72592.35   | 62421.95   | 59006.11   | 50212.82   | 1630642   |

|           |           |           |           |           |           |           |           |           |           |
|-----------|-----------|-----------|-----------|-----------|-----------|-----------|-----------|-----------|-----------|
| LP366.264 | LP366.264 | LP366.263 | LP366.263 | LP366.264 | LP366.264 | LP366.263 | LP366.264 | LP366.264 | LP366.264 |
| 285111.8  | 1433496   | 1034645   | 887580.8  | 1505997   | 947753.8  | 1302491   | 735031.5  | 996622.1  | 1482836   |
| 299072.8  | 1668198   | 1354544   | 1469881   | 1014547   | 1383056   | 1307662   | 971258.8  | 798593.5  | 1332487   |
| 203769.4  | 1062583   | 1171229   | 1189817   | 1385368   | 1271772   | 905897.9  | 632893.8  | 776617.8  | 2086475   |
| 225313.8  | 1399570   | 1371910   | 1720044   | 1717876   | 783356    | 1386615   | 825255.4  | 1109793   | 1237914   |
| 202978.3  | 1267291   | 1435013   | 1210665   | 985614.8  | 883064    | 1054831   | 784005.3  | 1147627   | 1119884   |

|           |           |           |           |           |           |           |           |           |           |
|-----------|-----------|-----------|-----------|-----------|-----------|-----------|-----------|-----------|-----------|
| LP366.264 | LP366.264 | LP366.264 | LP366.263 | LP366.264 | LP366.264 | LP366.263 | LP366.264 | LP366.264 | LP366.264 |
| 1119619   | 1797712   | 1574642   | 1183395   | 1047716   | 1105734   | 1069648   | 853531.7  | 1352483   | 1022552   |
| 638853.6  | 1645204   | 1160112   | 952058.9  | 739606.1  | 1393272   | 1117585   | 857943.7  | 1215701   | 1000750   |
| 588449.4  | 1425779   | 2766654   | 1634484   | 902723.2  | 1194157   | 1065798   | 800645.4  | 1494618   | 904097    |
| 700259.4  | 2183015   | 1302233   | 1218554   | 729787.4  | 1765125   | 1356470   | 759341.8  | 1145531   | 971906    |
| 840095.7  | 2311921   | 1299386   | 1198851   | 827397    | 1735743   | 929434.3  | 526648.7  | 1761547   | 970237.8  |

|           |           |           |           |           |           |           |           |           |           |
|-----------|-----------|-----------|-----------|-----------|-----------|-----------|-----------|-----------|-----------|
| LP366.264 |
| 1312998   | 970340.3  | 680876.9  | 264048.9  | 925615.7  | 770664.5  | 736328.2  | 2216788   | 1106285   | 1408499   |
| 1059286   | 912101.3  | 768044.5  | 418679.6  | 1010566   | 895404.4  | 714118    | 1744003   | 1309231   | 1892642   |
| 1078535   | 1570538   | 606786.4  | 574917.5  | 772317.8  | 964764    | 1179278   | 2103585   | 1817023   | 1688659   |
| 1706996   | 1001631   | 743177.7  | 278058.2  | 1019450   | 906096.2  | 993826.2  | 1561277   | 1200199   | 1450275   |
| 1067849   | 1137892   | 982041.2  | 355453.8  | 1017286   | 789969.3  | 836650.4  | 1668079   | 1032640   | 1776264   |

|           |           |           |           |           |           |           |           |           |           |
|-----------|-----------|-----------|-----------|-----------|-----------|-----------|-----------|-----------|-----------|
| LP366.264 |
| 2085769   | 1062788   | 1932835   | 1157334   | 274945.3  | 1004707   | 1289313   | 1515980   | 1295232   | 641305.3  |
| 2144350   | 1003854   | 1278421   | 1467207   | 272547.4  | 1200189   | 1328559   | 1299615   | 1113054   | 590820.1  |
| 2639672   | 1133295   | 1232930   | 981717.7  | 225478.6  | 1278457   | 1468284   | 1222412   | 945346.9  | 663790.9  |
| 1720324   | 925384.3  | 1682595   | 1324178   | 293065.5  | 993323.4  | 1433643   | 1634503   | 1247933   | 928199.5  |
| 1976201   | 1600130   | 1445059   | 2053999   | 220217.1  | 830145    | 1046924   | 1548021   | 1115357   | 836426.9  |

|           |           |           |           |           |           |           |           |           |           |
|-----------|-----------|-----------|-----------|-----------|-----------|-----------|-----------|-----------|-----------|
| LP366.264 |
| 1633259   | 1611903   | 1013026   | 1696689   | 850365.2  | 659528.5  | 1949629   | 150293    | 1413827   | 1118129   |
| 1910442   | 1516175   | 1021048   | 1347129   | 600151.6  | 414745.8  | 1609660   | 208890.7  | 1534551   | 1239174   |
| 1440295   | 1276656   | 1602769   | 1261653   | 553966.8  | 641153.7  | 1768228   | 159202.9  | 1203475   | 1060810   |
| 1290179   | 1839224   | 1146020   | 1299537   | 781688.5  | 632214    | 1778565   | 207307.5  | 1276770   | 1631344   |
| 1718030   | 1228578   | 1443563   | 2051982   | 698271.6  | 568306.5  | 1895184   | 154805.6  | 1202778   | 1237297   |

|           |           |           |           |           |           |           |           |           |           |
|-----------|-----------|-----------|-----------|-----------|-----------|-----------|-----------|-----------|-----------|
| LP366.264 |
| 321670.7  | 1114862   | 597644    | 146982.8  | 2005643   | 229668.2  | 983840.6  | 1109057   | 1068010   | 1306368   |
| 278734.4  | 1778928   | 699739.7  | 171085.2  | 1224636   | 268312.9  | 891145.1  | 982550.3  | 728764.1  | 1129020   |
| 198503.1  | 1265335   | 499864.9  | 152680.6  | 1420872   | 208279    | 1153868   | 1264045   | 791339.1  | 1242330   |
| 330176.7  | 1057098   | 840125.8  | 213765.6  | 1973886   | 324487.7  | 1036599   | 774880.2  | 875621.8  | 1511575   |
| 266829.3  | 1198442   | 701444.2  | 161690.5  | 1833517   | 387537.2  | 934950.4  | 906116.6  | 920429.7  | 1653360   |

|           |           |           |           |           |           |           |           |           |           |
|-----------|-----------|-----------|-----------|-----------|-----------|-----------|-----------|-----------|-----------|
| LP366.264 |
| 925078.1  | 143865.9  | 644378.8  | 1125032   | 148389.3  | 1075595   | 1255957   | 639001.1  | 768845.3  | 968099.4  |
| 899564.3  | 85156.2   | 611047.8  | 998825.3  | 116294    | 1200395   | 1142459   | 902475.4  | 781268    | 947536.9  |
| 1177747   | 124647.3  | 821744.8  | 1311819   | 118109.6  | 1366429   | 1298451   | 959988.9  | 1145687   | 1016503   |
| 1053779   | 107128.4  | 627335.7  | 1048536   | 149526.5  | 1153522   | 772785.4  | 846102.3  | 1010677   | 1190201   |
| 1172216   | 79697.65  | 653147.9  | 931119.6  | 171412.3  | 1605626   | 1283092   | 963162.1  | 854624.6  | 1010151   |



|           |           |           |           |           |           |           |           |           |           |
|-----------|-----------|-----------|-----------|-----------|-----------|-----------|-----------|-----------|-----------|
| LP366.264 | LP366.264 | LP366.264 | LP366.264 | LP366.264 | LP366.264 | LP366.298 | LP366.306 | LP366.373 | LP366.373 |
| 816924.6  | 1202920   | 865250.9  | 188631    | 200311    | 409883.7  | 206078.2  | 561217.5  | 547832.4  | 125635.5  |
| 1038446   | 815794.7  | 759240.6  | 206234    | 219419.9  | 415670.6  | 184201.5  | 539986.6  | 356541.1  | 132608.6  |
| 853180.2  | 609253.6  | 833197.5  | 226300.7  | 159042.3  | 385229.5  | 175702.4  | 519347.8  | 365158.6  | 133925.2  |
| 997281.1  | 967903    | 1156725   | 255562.3  | 122099.4  | 446844.2  | 24295.46  | 539376.7  | 374064.1  | 117505.6  |
| 667192.6  | 702317.4  | 940597.2  | 350920.5  | 107372.9  | 426903.6  | 183669.3  | 557694.8  | 436260.3  | 117780.8  |

|           |           |           |           |           |           |           |           |           |           |
|-----------|-----------|-----------|-----------|-----------|-----------|-----------|-----------|-----------|-----------|
| LP366.373 | LP367.172 | LP367.172 | LP367.172 | LP367.172 | LP367.172 | LP367.172 | LP367.173 | LP367.173 | LP367.173 |
| 30193.97  | 42948.88  | 48235.04  | 41608.13  | 47990.17  | 81493.2   | 61266.82  | 54003.51  | 57320.45  | 48115.87  |
| 33415.24  | 41138.51  | 46411.15  | 39592.26  | 45905.19  | 74065.19  | 62979.24  | 59170.44  | 55724.82  | 42887.85  |
| 29967.53  | 46356.07  | 44456.49  | 39697.1   | 51739.46  | 78714.21  | 71853.05  | 77071.43  | 71632.84  | 44239.98  |
| 36723.29  | 46774.44  | 44128.51  | 44425.97  | 47092.95  | 75459.65  | 65734.82  | 58768.18  | 70646.58  | 42497.45  |
| 37320.77  | 42657.07  | 42974.57  | 39167.74  | 44611.92  | 72067.56  | 62800.47  | 41259.08  | 64570.84  | 34596.68  |

|           |           |           |           |           |           |           |           |           |           |
|-----------|-----------|-----------|-----------|-----------|-----------|-----------|-----------|-----------|-----------|
| LP367.173 | LP367.172 | LP367.173 | LP367.173 | LP367.173 | LP367.172 | LP367.173 | LP367.173 | LP367.173 | LP367.173 |
| 72971.44  | 78105.47  | 44292.94  | 73124.16  | 84073.88  | 72646.28  | 70300.19  | 88618.4   | 73927     | 72356.6   |
| 70731.98  | 69539.63  | 49023.5   | 71636.49  | 73146.63  | 65266.15  | 69919.7   | 84071.28  | 69698.46  | 75442.63  |
| 73530.2   | 118958.3  | 39280.84  | 47816.93  | 104943.5  | 79742.65  | 80611.08  | 96162.06  | 72808.74  | 98110.09  |
| 76056.56  | 112436.9  | 32396.75  | 69835.43  | 61543.87  | 85576.44  | 61717.75  | 80339.74  | 72461.76  | 69684.19  |
| 72475.05  | 67623.19  | 47237.65  | 55238.37  | 86797.62  | 67952.53  | 59902.93  | 85376.2   | 83415.31  | 66714.09  |

|           |           |           |           |           |           |           |           |           |           |
|-----------|-----------|-----------|-----------|-----------|-----------|-----------|-----------|-----------|-----------|
| LP367.173 | LP367.173 | LP367.173 | LP367.173 | LP367.172 | LP367.172 | LP367.173 | LP367.173 | LP367.173 | LP367.172 |
| 59768.2   | 76430.83  | 70394.29  | 37371.55  | 65479.81  | 61837.28  | 72684.06  | 61126.68  | 89332.9   | 94664.15  |
| 54179.22  | 79215.61  | 64509.31  | 39937.24  | 63382.97  | 59491.14  | 60624.31  | 56734.71  | 80744.47  | 90144.88  |
| 58751.83  | 61806.45  | 56315.02  | 55137.27  | 59350.12  | 95126.92  | 65343.16  | 82155.87  | 81991.64  | 93749.1   |
| 76109.07  | 58500.61  | 63809.33  | 36940.11  | 67420.06  | 65887.38  | 71640.78  | 48647.58  | 93699.35  | 75281.83  |
| 61160.29  | 79838.95  | 83800.25  | 32322.48  | 73406.57  | 69884.08  | 78090.03  | 56649.79  | 76590.27  | 66109.86  |

|           |           |           |           |           |           |           |           |           |           |
|-----------|-----------|-----------|-----------|-----------|-----------|-----------|-----------|-----------|-----------|
| LP367.173 | LP367.173 | LP367.173 | LP367.173 | LP367.173 | LP367.172 | LP367.173 | LP367.173 | LP367.173 | LP367.173 |
| 66322.63  | 73729.36  | 41983.76  | 72202.8   | 35465.89  | 72107.94  | 61226.26  | 47799.55  | 57630.36  | 87125.35  |
| 70648.33  | 79573.06  | 39342.69  | 61851.22  | 36367.83  | 68303.65  | 59954.48  | 49255.11  | 48460.69  | 75303.07  |
| 65346.37  | 88681.14  | 37645.11  | 61912.38  | 31510.5   | 68099.53  | 64451.48  | 49547.45  | 67388.69  | 84158.44  |
| 64265.22  | 121016    | 38723.93  | 48758.16  | 33865.02  | 64633.98  | 64292.54  | 51484.54  | 55839.03  | 78138.06  |
| 58713.2   | 57751.95  | 48622.31  | 53781.69  | 41927.47  | 58825.66  | 76377.39  | 40905.17  | 55331.51  | 64677.42  |

|           |           |           |           |           |           |           |           |           |           |
|-----------|-----------|-----------|-----------|-----------|-----------|-----------|-----------|-----------|-----------|
| LP367.173 |
| 35481.61  | 62025.47  | 66608.36  | 56274.95  | 83362.97  | 77541.28  | 69595.93  | 68821.65  | 46743.23  | 77223.7   |
| 36259.8   | 66540.39  | 64734.41  | 59777.2   | 79893.55  | 73361.68  | 63557.53  | 69564.85  | 44837.16  | 82627.77  |
| 29971.72  | 72599.59  | 100776.1  | 84384.57  | 86528.18  | 71742.67  | 69281.35  | 97598.76  | 54538.4   | 94702.88  |
| 48927.62  | 58222.84  | 58725.73  | 62530.99  | 95283.8   | 73600.43  | 56667.36  | 69783.01  | 48266.74  | 100011.9  |
| 36593.69  | 63405.17  | 55207.9   | 61356.88  | 72451.1   | 71246.79  | 48981.26  | 64675.98  | 37906.79  | 69567.07  |

|           |           |           |           |           |           |           |           |           |           |
|-----------|-----------|-----------|-----------|-----------|-----------|-----------|-----------|-----------|-----------|
| LP367.173 |
| 70955.63  | 65857.22  | 58498.57  | 72096.68  | 56350.92  | 71907.46  | 73091.07  | 87616.56  | 54426.82  | 66394.93  |
| 77736.96  | 66618.46  | 67830.9   | 67191.36  | 56630.85  | 69466.91  | 78750.42  | 82734.32  | 55990.08  | 61251.73  |
| 61278.97  | 63249.41  | 75343.05  | 88420.34  | 56920.91  | 93079.43  | 59129.24  | 57554.48  | 55659.41  | 57676.18  |
| 53885.56  | 74744.51  | 62442.03  | 86447.65  | 39895.61  | 58128.77  | 69164.78  | 78769.64  | 54486.57  | 45466.27  |
| 60358.98  | 100303.4  | 72357.9   | 52958.92  | 65859.47  | 85404.51  | 113048.9  | 70485.29  | 33783.17  | 72627.55  |

|           |           |           |           |           |           |           |           |           |           |
|-----------|-----------|-----------|-----------|-----------|-----------|-----------|-----------|-----------|-----------|
| LP367.173 |
| 44332.49  | 77977.94  | 58312.69  | 50966.43  | 72456.38  | 36736.02  | 59204.7   | 78127.62  | 90466.32  | 71525.17  |
| 46893.91  | 79292.99  | 49478.39  | 52121.52  | 73878.12  | 35256.6   | 52163.9   | 70996.87  | 92533.38  | 69742.37  |
| 44453.86  | 82599.69  | 50414.36  | 62623.75  | 55351.25  | 30904.88  | 75749.21  | 84380.07  | 84865.71  | 91250.04  |
| 41091.24  | 62782.89  | 57904.44  | 71545.1   | 53966.33  | 39766.07  | 58656.77  | 60220.12  | 81355.82  | 76128.57  |
| 48688.76  | 103476.5  | 59803.14  | 43168.12  | 83002.81  | 40354.86  | 43418.62  | 95126.13  | 79723.5   | 57729.16  |



|           |           |           |           |           |           |           |           |           |           |
|-----------|-----------|-----------|-----------|-----------|-----------|-----------|-----------|-----------|-----------|
| LP367.173 |
| 60437.31  | 58239.08  | 76233.68  | 72824.69  | 61189.72  | 61644.69  | 67068.74  | 70482.23  | 70848.29  | 43032.33  |
| 61113.05  | 62139.34  | 79264.05  | 67627.88  | 58589.48  | 64725.82  | 68005.21  | 70619.4   | 74875.99  | 43246.75  |
| 61749.5   | 54578.17  | 85807.47  | 55494.66  | 80417.92  | 69176.91  | 56541.69  | 76883.19  | 66599.86  | 66413.87  |
| 61696.1   | 66628.67  | 66847.48  | 90575.22  | 76806.72  | 62964.49  | 64854.62  | 56125.96  | 69708.7   | 40891.09  |
| 64958.3   | 62979.79  | 83306.34  | 71490.48  | 68078.49  | 45193.76  | 62824.17  | 82217.42  | 98991.42  | 48684.08  |

|           |           |           |           |           |           |           |           |           |           |
|-----------|-----------|-----------|-----------|-----------|-----------|-----------|-----------|-----------|-----------|
| LP367.173 | LP367.210 |
| 61488.72  | 44890.18  | 73259.18  | 70713.55  | 71329.04  | 70386.54  | 61792.5   | 73762.67  | 74371.45  | 79477.55  |
| 60840.4   | 44619.16  | 76103.08  | 60538.65  | 68580.89  | 74284.35  | 63953.01  | 71466.49  | 74361.93  | 58205.75  |
| 61437.12  | 39674.58  | 65300.83  | 94655.1   | 69171.7   | 68872.04  | 50671.26  | 65798.36  | 76675.76  | 65890.28  |
| 75922.36  | 40762.62  | 82482.59  | 61596.63  | 66691.59  | 69735.4   | 63073.3   | 67093.24  | 74718.58  | 57392.05  |
| 69385.18  | 43883.72  | 94482.9   | 65257.73  | 65306.2   | 86231.08  | 89616.98  | 75199.18  | 76348.94  | 54029.56  |

|           |           |           |           |           |           |           |          |           |           |
|-----------|-----------|-----------|-----------|-----------|-----------|-----------|----------|-----------|-----------|
| LP367.210 | LP367.210 | LP367.210 | LP367.209 | LP367.209 | LP367.209 | LP367.210 | LP367.21 | LP367.209 | LP367.209 |
| 78176.49  | 66060.71  | 67488.86  | 69379.76  | 45728.05  | 72550.33  | 28893.97  | 59150.83 | 74181.36  | 37960.08  |
| 52637.64  | 56779.85  | 79482.03  | 54591.41  | 88185.81  | 75210.21  | 49503.08  | 76520.72 | 74069.56  | 61170.41  |
| 54513.64  | 52518.68  | 70668.09  | 55743.86  | 83323.12  | 77896.45  | 46799.12  | 77442.19 | 87322.88  | 63428.43  |
| 76044.79  | 54335.33  | 79732.89  | 63796.63  | 79835.14  | 100958.4  | 49085.25  | 65691.56 | 71555.38  | 67788.63  |
| 48991.27  | 54655.96  | 82616.52  | 57397.29  | 79762.95  | 81074.99  | 46435.12  | 74976.4  | 71249.76  | 63747.46  |

|           |           |           |           |           |           |           |           |           |           |
|-----------|-----------|-----------|-----------|-----------|-----------|-----------|-----------|-----------|-----------|
| LP367.210 | LP367.209 | LP367.209 | LP367.209 | LP367.21_ | LP367.209 | LP367.210 | LP367.209 | LP367.209 | LP367.209 |
| 76565.18  | 66206.03  | 61472.32  | 76717.4   | 79948.4   | 43892.84  | 74046.53  | 59380.01  | 70193.2   | 44090.29  |
| 64963.62  | 71233.93  | 63805.62  | 59784.68  | 77740.24  | 44910.07  | 81916.97  | 73891.54  | 92159.3   | 62700.16  |
| 79125.3   | 70807.03  | 75854.91  | 59888.25  | 51259.56  | 47491.88  | 72506.91  | 69564.71  | 96807.61  | 69140.32  |
| 71427.44  | 73043.23  | 64300.44  | 59226.59  | 82321.55  | 46565.74  | 74457.49  | 75340.56  | 90182.95  | 67036.21  |
| 73720.77  | 73631.37  | 66908.45  | 58049.05  | 76438.52  | 42451.8   | 79573.28  | 66663.08  | 82501.7   | 64921.19  |

|           |           |           |           |           |           |           |           |           |           |
|-----------|-----------|-----------|-----------|-----------|-----------|-----------|-----------|-----------|-----------|
| LP367.21_ | LP367.209 | LP367.209 | LP367.209 | LP367.209 | LP367.210 | LP367.210 | LP367.209 | LP367.209 | LP367.209 |
| 50311.08  | 81498.84  | 67282.13  | 61547.51  | 49733.85  | 91321.13  | 35949.86  | 36492.98  | 76710.54  | 60729.32  |
| 72275.23  | 80971.79  | 72145.78  | 82114.62  | 80484.7   | 90626.28  | 38574.35  | 49351.11  | 80743.38  | 55209.95  |
| 67444.39  | 87946.89  | 72918.26  | 84216.24  | 80534.3   | 88742.7   | 44103.98  | 48555.77  | 82932.6   | 58268.47  |
| 77529.94  | 82526.06  | 68063.1   | 80246.11  | 80937.75  | 94330.37  | 40818.47  | 49069.58  | 75705.4   | 58330.51  |
| 67265.79  | 79387.49  | 67275.32  | 80934.78  | 79403.1   | 99340.45  | 43246.11  | 44455.17  | 87061.82  | 51203.44  |

|           |           |           |           |           |          |           |          |          |           |
|-----------|-----------|-----------|-----------|-----------|----------|-----------|----------|----------|-----------|
| LP367.209 | LP367.210 | LP367.209 | LP367.209 | LP367.210 | LP367.21 | LP367.210 | LP367.21 | LP367.21 | LP367.210 |
| 57888.58  | 58399.17  | 47171.47  | 56739.81  | 56581.28  | 53768.49 | 60490.38  | 56859.2  | 58555.11 | 41166.16  |
| 84292.25  | 127182.4  | 63581.11  | 61769.15  | 61679.5   | 62474.21 | 55492.29  | 68294.66 | 97252.88 | 52708.25  |
| 82752.61  | 123094.9  | 66548.36  | 43665.9   | 61519.05  | 63624.4  | 58287.12  | 65099.29 | 101467.6 | 57983.5   |
| 87742.03  | 124604.4  | 63040.31  | 60543.29  | 56241.72  | 56502.22 | 56329.23  | 61856.94 | 98138.42 | 52925.15  |
| 83993.85  | 121708.5  | 59922.74  | 62127.02  | 61553.11  | 58409.4  | 57148.88  | 55519.64 | 97043.76 | 50417     |

|           |           |           |           |           |           |           |           |           |           |
|-----------|-----------|-----------|-----------|-----------|-----------|-----------|-----------|-----------|-----------|
| LP367.21_ | LP367.209 | LP367.209 | LP367.210 | LP367.209 | LP367.209 | LP367.209 | LP367.209 | LP367.21_ | LP367.210 |
| 60098.26  | 99042.24  | 75370.25  | 74297.03  | 84401.71  | 56055.66  | 59194.43  | 54023.4   | 55733.33  | 120906.8  |
| 70606.5   | 79559.89  | 81730.76  | 70395.56  | 78019.66  | 57708.25  | 71476.89  | 63290.66  | 65890.88  | 119074.4  |
| 62795.52  | 87426.01  | 91396.69  | 72496.7   | 76359.33  | 56663.44  | 69509.97  | 67182.01  | 69228.27  | 118252.2  |
| 69441.21  | 84945.72  | 96112.48  | 67072.75  | 76915.23  | 58613.61  | 67018.1   | 65626.57  | 64811.36  | 125071.7  |
| 72073.5   | 90148.98  | 89485.53  | 69035.05  | 82391.6   | 52040.21  | 71822.75  | 62808.67  | 64908.01  | 114300.9  |

|           |           |           |           |           |           |           |           |           |           |
|-----------|-----------|-----------|-----------|-----------|-----------|-----------|-----------|-----------|-----------|
| LP367.209 | LP367.209 | LP367.209 | LP367.209 | LP367.21_ | LP367.209 | LP367.209 | LP367.209 | LP367.210 | LP367.209 |
| 63015.29  | 50193.57  | 27060.96  | 64301.29  | 32450.89  | 52760.73  | 40478.75  | 76979.45  | 82443.34  | 24286.11  |
| 71103.08  | 50703.05  | 28476.36  | 58525.38  | 34265.98  | 47002.26  | 44748.03  | 88661.67  | 74140.36  | 29337.43  |
| 75495.92  | 53438.1   | 32079.4   | 60606.75  | 35553.65  | 48299.28  | 50741.78  | 92699.54  | 78669.94  | 30483.61  |
| 74895.12  | 54737.59  | 32555.84  | 60652.3   | 38599.37  | 54457.07  | 51406.41  | 96081.13  | 77878.87  | 28054.34  |
| 70390.83  | 51390.21  | 31299.87  | 56759.02  | 33321.8   | 61656.08  | 55129.08  | 92878.03  | 79398.21  | 25024.47  |



|           |           |           |           |           |           |           |           |           |           |
|-----------|-----------|-----------|-----------|-----------|-----------|-----------|-----------|-----------|-----------|
| LP367.21_ | LP367.209 | LP367.209 | LP367.209 | LP367.209 | LP367.21_ | LP367.209 | LP367.209 | LP367.245 | LP367.247 |
| 79148.32  | 60521.56  | 58953.73  | 59236.87  | 47898.37  | 29396.99  | 65341.93  | 50716.99  | 80838.35  | 46917.36  |
| 89937.77  | 68078.37  | 58425.22  | 72724.2   | 54999.23  | 33131.61  | 74746.88  | 56526.73  | 93527.96  | 49900.25  |
| 91971.49  | 69977.69  | 71310.41  | 76318.8   | 56536.83  | 34915.16  | 81307.33  | 52852.28  | 93482.55  | 50497.66  |
| 83962.9   | 67390.33  | 67943.43  | 74569.48  | 56008.07  | 36462.01  | 76481.4   | 48892.99  | 88140.97  | 50805.06  |
| 94999.34  | 61649.95  | 59455.6   | 71590.43  | 49436.47  | 31541.42  | 73340.12  | 55140.05  | 85302.16  | 49883.61  |

|           |           |           |           |           |           |           |           |           |           |
|-----------|-----------|-----------|-----------|-----------|-----------|-----------|-----------|-----------|-----------|
| LP367.247 |
| 72514.29  | 72573.04  | 58506.83  | 67697.74  | 72192.83  | 65763.93  | 56107.19  | 45320.83  | 95785.74  | 54576.43  |
| 64588.41  | 75674.95  | 62764.87  | 71295.75  | 75851.17  | 60916.65  | 56783.3   | 49094.28  | 95581.33  | 49394.5   |
| 62134.39  | 69452.23  | 60509.95  | 68196.4   | 73112.05  | 61732.46  | 56601.54  | 48345.34  | 95339.53  | 49743.16  |
| 63190.39  | 70153.64  | 61570.11  | 68584.58  | 71374.53  | 60949.36  | 53845.97  | 52439.21  | 96710.83  | 51518.64  |
| 60010.63  | 76086.87  | 63864.94  | 69997.16  | 73877.34  | 63385.01  | 54655.96  | 46258.16  | 93691.05  | 49819.74  |

|           |           |           |           |           |           |           |           |           |           |
|-----------|-----------|-----------|-----------|-----------|-----------|-----------|-----------|-----------|-----------|
| LP367.248 | LP367.247 | LP367.267 |
| 55619.99  | 53975.98  | 259288.6  | 52886.19  | 43854.25  | 209736.9  | 263123.7  | 172844.1  | 266238.7  | 385182.9  |
| 62756.08  | 51458.65  | 275984.4  | 51266.9   | 61865.34  | 234423.3  | 251129.2  | 197019.1  | 411212.9  | 284937.8  |
| 58272.23  | 55353.56  | 285688.8  | 54835.08  | 53592.14  | 286780.1  | 369937.2  | 294347.1  | 248431.9  | 322348.5  |
| 54747.65  | 50308.65  | 275594.1  | 46952.56  | 54063.82  | 235361.8  | 260997.9  | 227084    | 399637.6  | 311161.5  |
| 55302.23  | 51117.9   | 207577.2  | 47221.12  | 44206.48  | 347644    | 200629.7  | 183984.5  | 347208.8  | 397820    |

|           |           |           |           |           |           |           |           |           |           |
|-----------|-----------|-----------|-----------|-----------|-----------|-----------|-----------|-----------|-----------|
| LP367.267 |
| 338069.6  | 306290.4  | 243177.8  | 324657.8  | 238645.2  | 325264    | 387400.9  | 378518.1  | 279178    | 314270.5  |
| 251079.5  | 418945.3  | 222958    | 455139.9  | 273939.5  | 240471.6  | 296392.1  | 318878.5  | 413290.8  | 274363.3  |
| 329394.5  | 400401.6  | 171304.6  | 321955.9  | 418657.5  | 250330.5  | 245809.9  | 385289.8  | 376643.1  | 545828.9  |
| 267773.7  | 313056.9  | 242516.7  | 474481    | 354567.1  | 216745.8  | 280966.4  | 494761.9  | 261144.9  | 326320.9  |
| 254558.4  | 400386.2  | 218827.9  | 304970.8  | 283569.8  | 254237    | 222305.6  | 347138.7  | 401969.7  | 268427.8  |

|           |           |           |           |           |           |           |           |           |           |
|-----------|-----------|-----------|-----------|-----------|-----------|-----------|-----------|-----------|-----------|
| LP367.267 |
| 342964.8  | 162090.2  | 249281.5  | 338637.6  | 341315.4  | 332505.7  | 468488    | 512471.8  | 263672.1  | 227417.4  |
| 332591.2  | 144838.1  | 486048.6  | 332741.7  | 230372.1  | 283029.6  | 460085.2  | 337030.4  | 274712.2  | 287308.6  |
| 411261.3  | 245100.6  | 277241.4  | 310367.8  | 355374    | 286169.7  | 517108.8  | 367581    | 336539.8  | 300310    |
| 478947.5  | 216482.7  | 322888.3  | 342384.1  | 396764.2  | 221456.3  | 301225.3  | 370979.1  | 307015.1  | 331199.6  |
| 405965.3  | 192681.5  | 447926    | 336103    | 288838.4  | 268553.7  | 303584.9  | 382510.8  | 305069.4  | 317701.9  |

|           |           |           |           |           |           |           |           |           |           |
|-----------|-----------|-----------|-----------|-----------|-----------|-----------|-----------|-----------|-----------|
| LP367.267 |
| 274180.7  | 232251.2  | 312660.1  | 228621    | 265115.4  | 246017    | 204122.2  | 404465.7  | 414918.4  | 246733.5  |
| 237597    | 266130.3  | 261024.8  | 250913.6  | 291608.7  | 322857    | 186512.6  | 238272    | 262024.9  | 288517.5  |
| 186764.7  | 328429.2  | 220735.9  | 152038.7  | 280689.5  | 269950.5  | 175453.7  | 263282.8  | 247742.4  | 263586.6  |
| 394144.8  | 345059.3  | 492901.9  | 344438.9  | 257985.8  | 344269.7  | 205093.8  | 262432.2  | 376664.7  | 333833.5  |
| 220784.2  | 349943.9  | 373480.1  | 195668.3  | 263471.1  | 354019.7  | 223531.5  | 342599.7  | 338753.7  | 298039.4  |

|           |           |           |           |           |           |           |           |           |           |
|-----------|-----------|-----------|-----------|-----------|-----------|-----------|-----------|-----------|-----------|
| LP367.267 | LP367.267 | LP367.267 | LP367.267 | LP367.267 | LP367.268 | LP367.267 | LP367.267 | LP367.267 | LP367.267 |
| 208711.1  | 272815.4  | 193210.7  | 218691.1  | 287395.7  | 240784.7  | 222762.9  | 237646.5  | 246286    | 216658.8  |
| 186234.4  | 130525.9  | 181233.4  | 256178    | 274213.3  | 270216.2  | 194412.4  | 192934.9  | 260145.8  | 206089.7  |
| 154437.5  | 114523.2  | 269858.4  | 225747.7  | 233669.1  | 266318.6  | 192379    | 157865.4  | 204787.1  | 250934.7  |
| 149273.1  | 119235    | 256429.5  | 268370.9  | 266881.4  | 350403.1  | 191643.4  | 217221.3  | 211818.6  | 188271.8  |
| 275765.9  | 180335.8  | 159455.7  | 230808.8  | 262651.4  | 283238.6  | 203760.1  | 208342.9  | 280720.5  | 170482.9  |

|           |           |           |           |           |           |           |           |           |           |
|-----------|-----------|-----------|-----------|-----------|-----------|-----------|-----------|-----------|-----------|
| LP367.267 |
| 398109.9  | 250918.9  | 147155.5  | 251050.2  | 234448.2  | 202247.6  | 256024.5  | 349693.3  | 243416.7  | 272194    |
| 268364.2  | 177148.1  | 191146.9  | 250384.3  | 186848.2  | 282074.8  | 261847.4  | 247035.8  | 258614.2  | 263941    |
| 347841.9  | 163213.4  | 215748.4  | 332615    | 131151    | 318157.7  | 227535.7  | 214633.3  | 244148    | 388785.4  |
| 341207.4  | 182992.5  | 200538.8  | 233918.9  | 138177    | 299061.9  | 268174.2  | 243619.7  | 284795.8  | 258946.3  |
| 331701.2  | 183172.7  | 202634.3  | 376109.6  | 157864.1  | 370891.2  | 287124.3  | 245026.1  | 310134.4  | 235737    |



|           |           |           |           |           |           |           |           |           |           |
|-----------|-----------|-----------|-----------|-----------|-----------|-----------|-----------|-----------|-----------|
| LP367.267 |
| 171630    | 186397.5  | 323812.2  | 289783.2  | 222870.5  | 151538.9  | 193370.4  | 88616.95  | 150750.3  | 49051.93  |
| 146593.8  | 181590.3  | 323368.2  | 210051.9  | 177141.6  | 141988.2  | 185245.9  | 129191.7  | 200187.6  | 37392.57  |
| 120319.9  | 178553.4  | 211742.7  | 307932.2  | 209893.7  | 183163.4  | 176482    | 116782.1  | 186242.8  | 39302.72  |
| 169111.8  | 219037.2  | 253147.2  | 204518    | 196994.9  | 146599.4  | 184558.7  | 113266.9  | 202355.4  | 38862.99  |
| 142432.4  | 193472.2  | 277796    | 210640.8  | 194951.2  | 152128.3  | 186677.9  | 104609.1  | 206930.4  | 38531.34  |

|           |          |          |          |          |          |          |          |          |          |          |
|-----------|----------|----------|----------|----------|----------|----------|----------|----------|----------|----------|
| LP367.267 | 73944.43 | 164756.9 | 40011.36 | 57309.24 | 25427.02 | 40886.77 | 64872.98 | 27763.78 | 43150.62 | 114903.8 |
| LP367.267 | 73996.24 | 154385.3 | 56262.23 | 58017.66 | 27360.74 | 32602.54 | 70901.04 | 24479.3  | 48789.83 | 103798.1 |
| LP367.267 | 72771.15 | 189531.5 | 69242.45 | 59065.38 | 32425.51 | 32940.69 | 58377.25 | 20810.15 | 36143.01 | 90205.9  |
| LP367.267 | 74660.84 | 163714.8 | 60631.5  | 58944.35 | 28795.45 | 30658.09 | 75659.94 | 23550.8  | 39796.78 | 125932.3 |
| LP367.267 | 64162.96 | 149840.1 | 56639.89 | 51432.9  | 25887.43 | 31885.99 | 71392.81 | 22062.29 | 33456.74 | 104193.7 |

|           |           |           |           |           |           |           |           |           |           |
|-----------|-----------|-----------|-----------|-----------|-----------|-----------|-----------|-----------|-----------|
| LP367.267 | LP367.267 | LP367.267 | LP367.268 | LP367.268 | LP367.268 | LP367.282 | LP367.283 | LP367.321 | LP367.321 |
| 27864.82  | 26725.23  | 64977.46  | 201962.3  | 31628.96  | 34658.12  | 247463.7  | 429842.9  | 336602.2  | 210986    |
| 31046.14  | 23867.29  | 60860.92  | 230610.5  | 37326.62  | 39780.75  | 239842.6  | 422630.9  | 299176.2  | 229929.9  |
| 27628.18  | 23522.24  | 40832.59  | 237125.5  | 36992.38  | 43591.69  | 222196.5  | 376933.4  | 318692.3  | 220342.9  |
| 30006.48  | 25629.72  | 67031     | 351622.2  | 34085.08  | 40898.65  | 231469.5  | 397249    | 338467.7  | 225270.2  |
| 26888.55  | 25841.86  | 62640.19  | 245184.9  | 33858.21  | 42319.77  | 236769.1  | 408095.4  | 317648.6  | 240764.7  |

|           |           |           |           |           |           |           |           |           |           |
|-----------|-----------|-----------|-----------|-----------|-----------|-----------|-----------|-----------|-----------|
| LP367.332 | LP367.357 | LP367.357 | LP367.357 | LP367.357 | LP367.357 | LP367.357 | LP367.358 | LP368.191 | LP368.191 |
| 308047.2  | 42951.84  | 40560.64  | 47559.9   | 55787.27  | 65643.38  | 90807.13  | 63681.71  | 45849.17  | 69510.82  |
| 300425.3  | 44214.84  | 42456.99  | 55562.5   | 62055.63  | 78589.57  | 86512.85  | 60995.43  | 45980.44  | 69272.11  |
| 315217.7  | 43617.13  | 42380.12  | 54448.53  | 59759.27  | 70468.46  | 90483.04  | 61150.3   | 44450.7   | 65020.55  |
| 331368.6  | 43951.6   | 47832.95  | 53495.66  | 51411.08  | 68632.62  | 88803.48  | 56982.36  | 46544.16  | 65396.72  |
| 331005.4  | 43647.42  | 45406.6   | 58539.74  | 51984.49  | 76744.1   | 88110.43  | 69703.46  | 28031.74  | 46046.93  |

|           |           |           |           |           |           |           |           |           |           |
|-----------|-----------|-----------|-----------|-----------|-----------|-----------|-----------|-----------|-----------|
| LP368.191 | LP368.191 | LP368.191 | LP368.191 | LP368.228 | LP368.227 | LP368.228 | LP368.249 | LP368.270 | LP368.270 |
| 81693.5   | 58598.87  | 61503.82  | 58003.72  | 141634.9  | 122793.7  | 117589    | 113881.4  | 35620.78  | 37488.34  |
| 79883.6   | 57780.54  | 65002.87  | 51073.34  | 159335.6  | 117550.3  | 151041.5  | 126097.3  | 32910.68  | 34072.68  |
| 80596.74  | 62783.92  | 56435.17  | 46954.69  | 155096.8  | 123151.5  | 138630.1  | 114973.3  | 26260.7   | 31148.06  |
| 83208.82  | 63471     | 67264.74  | 57224.8   | 157619.7  | 120349.3  | 139406.5  | 118557.7  | 26977.84  | 33465.69  |
| 50652.56  | 61699.49  | 65685.72  | 53028.33  | 156904.6  | 126702.6  | 153638.5  | 115276.6  | 30178.69  | 32880.24  |

|           |           |           |           |           |           |           |           |           |           |
|-----------|-----------|-----------|-----------|-----------|-----------|-----------|-----------|-----------|-----------|
| LP368.270 | LP368.269 | LP368.292 | LP368.352 | LP368.352 | LP368.352 | LP368.389 | LP368.389 | LP368.389 | LP368.389 |
| 29246.04  | 33941.94  | 56705.49  | 12809.13  | 10824.48  | 26933.87  | 56656.43  | 114142    | 634438.5  | 20602.16  |
| 23232.32  | 28838.77  | 12550.37  | 9249.034  | 6968.768  | 29939.15  | 61251.58  | 125073.3  | 723072.9  | 24469.29  |
| 31853.17  | 25547.63  | 23359.26  | 11109.98  | 13630.19  | 32150.22  | 62724.59  | 192346.3  | 1154370   | 21135.06  |
| 34379.92  | 31602.45  | 36485.66  | 11556.21  | 13381.47  | 27523.42  | 61281.66  | 241582.3  | 1438210   | 21300.95  |
| 31837.51  | 26694.7   | 31097.3   | 9452.85   | 14976.49  | 28727.88  | 67487.15  | 259959.2  | 1584184   | 19980.69  |

|           |           |           |           |           |           |           |           |           |           |
|-----------|-----------|-----------|-----------|-----------|-----------|-----------|-----------|-----------|-----------|
| LP368.425 | LP369.188 |
| 68651.27  | 129356.8  | 156262.5  | 108026.6  | 109457.9  | 131948.6  | 118401.2  | 149974.4  | 122163.3  | 123025.7  |
| 80081.42  | 220072.4  | 165398.3  | 117248.4  | 102204.7  | 126310.5  | 163009.7  | 156240.7  | 120865.6  | 135996.7  |
| 81279.02  | 180867.3  | 165187.4  | 115501.3  | 111244.8  | 115460.3  | 91322.9   | 171415    | 119417.1  | 126302.5  |
| 74464.33  | 156640.8  | 183485.9  | 110905.3  | 121938.5  | 108319.2  | 159257.7  | 145262.3  | 150948.1  | 111674.8  |
| 98539.08  | 114469.9  | 109499.3  | 128647.6  | 144522.4  | 114668.7  | 101826.9  | 166082.8  | 129000    | 124422    |

|            |            |            |            |            |           |            |            |            |            |
|------------|------------|------------|------------|------------|-----------|------------|------------|------------|------------|
| LP369.188' | LP369.188' | LP369.188' | LP369.188' | LP369.188' | LP369.189 | LP369.188' | LP369.188' | LP369.188' | LP369.188' |
| 215349     | 122742.6   | 143780.6   | 138081.8   | 133951.6   | 123616.6  | 157482.1   | 161787.7   | 109463.9   | 151961.5   |
| 126817.5   | 121410.1   | 143707.7   | 127095.1   | 121176.6   | 137854.1  | 162238.9   | 112289.7   | 119794.7   | 163217.8   |
| 138849.3   | 171447.4   | 171339.9   | 106356.5   | 163393.2   | 134672.2  | 184655.5   | 113199.4   | 134295.8   | 185405.5   |
| 135504.7   | 148435.9   | 134050.8   | 147236.8   | 194937.9   | 141738.2  | 149365.7   | 223849.3   | 108885.8   | 134635.3   |
| 116092.6   | 121697     | 164060.3   | 196428.9   | 155615.7   | 149071.7  | 133265.6   | 143900.6   | 111646.7   | 119440.5   |



|           |           |           |           |           |           |           |           |           |           |
|-----------|-----------|-----------|-----------|-----------|-----------|-----------|-----------|-----------|-----------|
| LP369.188 | LP369.188 | LP369.188 | LP369.188 | LP369.188 | LP369.189 | LP369.188 | LP369.188 | LP369.188 | LP369.188 |
| 119407.5  | 190377.1  | 102554.5  | 215537.8  | 174383.2  | 155934.9  | 107946.7  | 157272.4  | 223179.1  | 200529.3  |
| 102212.2  | 140562.4  | 142538.7  | 159502.5  | 179729.9  | 199723.5  | 110320.1  | 156417.9  | 142006.6  | 160318    |
| 109503.7  | 151212.7  | 107154.7  | 108895.8  | 112835.5  | 141502.7  | 151690.4  | 186360    | 134087.2  | 198800.4  |
| 128054.9  | 131094.5  | 104178.2  | 129118.6  | 119168.7  | 199980.7  | 137474.2  | 201023.7  | 232216    | 167882.2  |
| 147895.4  | 157205.1  | 84289.92  | 126685.3  | 141179.6  | 135011    | 129514.4  | 161788.2  | 130500.1  | 213023.6  |

|           |           |           |           |           |           |           |           |           |           |
|-----------|-----------|-----------|-----------|-----------|-----------|-----------|-----------|-----------|-----------|
| LP369.188 | LP369.189 | LP369.188 | LP369.188 | LP369.188 | LP369.188 | LP369.188 | LP369.188 | LP369.189 | LP369.188 |
| 141297.2  | 112214.3  | 125523.6  | 110559.9  | 122080.2  | 117540.1  | 145071.6  | 195338.5  | 131707.3  | 197432.9  |
| 141660.5  | 152791.2  | 108519.8  | 109104.5  | 170085.4  | 101516.4  | 108381    | 114700.2  | 115787.5  | 176169.6  |
| 182939.1  | 189062.6  | 105828.1  | 166319.7  | 141445.5  | 113391.3  | 160398.8  | 132966.4  | 139304    | 174620.2  |
| 109916.1  | 130241.7  | 123401.1  | 142853.9  | 151468.2  | 141601.9  | 172853.4  | 149715.9  | 128134.1  | 161951.1  |
| 163241.7  | 178573.6  | 149159.4  | 89526.95  | 123947.5  | 167224.1  | 152121.1  | 122225.2  | 128718.9  | 169788    |

|           |           |           |           |           |           |           |           |           |           |
|-----------|-----------|-----------|-----------|-----------|-----------|-----------|-----------|-----------|-----------|
| LP369.188 | LP369.188 | LP369.188 | LP369.189 | LP369.188 | LP369.188 | LP369.188 | LP369.188 | LP369.189 | LP369.188 |
| 137641.6  | 108628.6  | 98989.97  | 178685.7  | 142258.9  | 161483.6  | 157500.9  | 122548.6  | 172250    | 106506.6  |
| 112019.4  | 165806.1  | 85940.62  | 169449    | 142176.2  | 125657.1  | 172791.8  | 124144.7  | 209051.4  | 100928.5  |
| 132321.2  | 262986.4  | 99833.42  | 225997    | 158212    | 109634.2  | 109905.2  | 120022.3  | 169487.2  | 97558.39  |
| 104309.1  | 113211.4  | 96511.66  | 135176.3  | 131191.7  | 106530.1  | 150214.2  | 171260.7  | 154288.2  | 93774.36  |
| 109289.6  | 139312.2  | 96200.72  | 181583.1  | 156087.5  | 125808.4  | 167659.3  | 112205.3  | 173794.5  | 108163.8  |

|           |           |           |           |           |           |           |           |           |           |
|-----------|-----------|-----------|-----------|-----------|-----------|-----------|-----------|-----------|-----------|
| LP369.188 | LP369.189 | LP369.189 | LP369.188 |
| 99355.89  | 185414.3  | 138116.8  | 147389.4  | 80362.56  | 149159.6  | 121718.7  | 162537.4  | 86313.62  | 130817.6  |
| 109203.9  | 105344.9  | 164993.2  | 145973.8  | 106148.1  | 151232.2  | 168244.4  | 114430.5  | 97464.1   | 85221.72  |
| 95069.64  | 165477.1  | 145459    | 163716.4  | 77729.95  | 158797.8  | 146490    | 122298.5  | 90657.82  | 151227.2  |
| 89589.59  | 137269.4  | 149359.5  | 149127.3  | 78055.01  | 174040.4  | 133611    | 115579.3  | 91833.12  | 139745.7  |
| 90989.97  | 135579.3  | 145865    | 151301.2  | 79128.68  | 141083.7  | 134693.3  | 130591.7  | 79874.52  | 125752.6  |

|           |           |           |           |           |           |           |           |           |           |
|-----------|-----------|-----------|-----------|-----------|-----------|-----------|-----------|-----------|-----------|
| LP369.188 | LP369.188 | LP369.188 | LP369.189 | LP369.189 | LP369.188 | LP369.188 | LP369.188 | LP369.188 | LP369.189 |
| 149673.3  | 131752    | 142065    | 143511.1  | 139153.2  | 137321.8  | 130346.4  | 61351.84  | 107860.7  | 168714.5  |
| 154838.5  | 168153.1  | 129841.2  | 194008.9  | 187449.8  | 110579.3  | 91947.39  | 54412.66  | 149626.2  | 178087.8  |
| 152708    | 176890.1  | 137692    | 130027.5  | 145220.4  | 122974.1  | 165808.8  | 63906.84  | 107183.9  | 143463.5  |
| 120081.7  | 160065.4  | 121801    | 124613.1  | 163711.5  | 149815.9  | 129548.1  | 73773.68  | 100836    | 179684.7  |
| 160671    | 112618.1  | 201306.9  | 149654.8  | 158481.4  | 125658    | 113656.5  | 65088.23  | 120441.7  | 131662.1  |

|           |           |           |           |           |           |           |           |           |           |
|-----------|-----------|-----------|-----------|-----------|-----------|-----------|-----------|-----------|-----------|
| LP369.188 |
| 88815.83  | 105549.3  | 102354.3  | 97265.62  | 94890.43  | 64055.78  | 96461.68  | 148441.7  | 74697.66  | 74778.89  |
| 74672.17  | 93412.92  | 95757.45  | 93394.49  | 68737.3   | 50514.2   | 132530.5  | 93941.02  | 59309.16  | 64497.12  |
| 68821.17  | 91187.74  | 122481    | 89128.12  | 110087.2  | 60361.04  | 90753.96  | 105125.1  | 78535.44  | 58661.26  |
| 59125.11  | 101891.9  | 154534.1  | 127088.1  | 98249.65  | 64310.83  | 83302.12  | 114772.5  | 91738.67  | 87928.77  |
| 70031.18  | 80667.09  | 110363.4  | 86051.95  | 91312.69  | 62355.6   | 87901.2   | 162123.3  | 76789.5   | 64700.49  |

|           |           |           |           |           |           |           |           |           |           |
|-----------|-----------|-----------|-----------|-----------|-----------|-----------|-----------|-----------|-----------|
| LP369.188 | LP369.188 | LP369.188 | LP369.199 | LP369.226 | LP369.240 | LP369.263 | LP369.263 | LP369.300 | LP369.300 |
| 93068.03  | 56009.57  | 84886.84  | 145369.8  | 86865.87  | 225067.7  | 33509.17  | 42745.54  | 49947.16  | 32362.82  |
| 89994.85  | 59326.42  | 82519.44  | 225596.9  | 122204.9  | 110300.6  | 32236.71  | 40547.32  | 49367.32  | 30631.22  |
| 87657.66  | 59252.18  | 116640.7  | 162976.7  | 121745.5  | 123289.1  | 30279.13  | 41171.55  | 50448.74  | 28583.04  |
| 94841.9   | 68628.61  | 62764.9   | 242167.6  | 123468.9  | 262600.6  | 30232.38  | 42317.58  | 53202.19  | 32928     |
| 70657.11  | 51029.75  | 74684.51  | 177141.2  | 123763.1  | 265331.8  | 34697.3   | 35868.79  | 40242.67  | 26930.17  |

|           |           |           |           |           |           |           |           |           |           |
|-----------|-----------|-----------|-----------|-----------|-----------|-----------|-----------|-----------|-----------|
| LP369.300 | LP369.300 | LP369.336 | LP369.336 | LP369.336 | LP369.336 | LP369.336 | LP369.351 | LP369.351 | LP369.351 |
| 36898.22  | 27623.25  | 24458.25  | 38618.88  | 55755.48  | 28430.97  | 27244.76  | 68336.15  | 78855.97  | 89212.07  |
| 33500.94  | 28028.43  | 22591.07  | 39478.11  | 49727.89  | 29452.3   | 31583.76  | 70742.55  | 75601.94  | 91865.12  |
| 38331.04  | 25030.54  | 19535.05  | 41392.77  | 52771.74  | 31075.69  | 33340.99  | 68455.77  | 120155.7  | 88053.97  |
| 31359.51  | 26994.05  | 27472.9   | 40023.96  | 51073.68  | 30094.39  | 30603.13  | 75864.9   | 69113.49  | 99754.34  |
| 35455.02  | 25021.42  | 22869.25  | 39102.92  | 54821.13  | 28858.48  | 31937.59  | 70674.18  | 76078.22  | 83460.33  |



|           |           |           |           |           |           |           |           |           |           |
|-----------|-----------|-----------|-----------|-----------|-----------|-----------|-----------|-----------|-----------|
| LP369.351 | LP369.383 | LP370.203 | LP370.355 | LP370.368 | LP370.395 | LP370.404 | LP370.404 | LP371.101 | LP371.101 |
| 62901.64  | 5969.262  | 29420.78  | 29103.35  | 148109.4  | 23941.64  | 177349.6  | 29841.93  | 142891.9  | 46682.96  |
| 59009.85  | 6337.731  | 40098.86  | 30407.61  | 131537.5  | 21116.28  | 189287.4  | 28183.93  | 205282.5  | 55738.77  |
| 55068.74  | 4784.886  | 28445.54  | 22239.17  | 140795.4  | 20994.22  | 246569.6  | 28594.59  | 222255.3  | 68201.62  |
| 71254.32  | 7650.905  | 31908.85  | 27673.91  | 191060.6  | 23484.06  | 290508.1  | 30838.58  | 379372.1  | 99894.67  |
| 68607.86  | 4004.424  | 29891.75  | 28574.02  | 156310.6  | 23102.07  | 306058.4  | 30186.1   | 325187.4  | 98550.59  |

|           |           |           |           |           |           |           |           |           |           |
|-----------|-----------|-----------|-----------|-----------|-----------|-----------|-----------|-----------|-----------|
| LP371.101 | LP371.101 | LP371.101 | LP371.167 | LP371.167 | LP371.168 | LP371.168 | LP371.168 | LP371.168 | LP371.168 |
| 54262.25  | 20378.2   | 32494.81  | 98387.29  | 48811.06  | 107974.3  | 74351.03  | 82737.87  | 66204.5   | 62982.14  |
| 72415.63  | 21201.42  | 34431.62  | 109534.7  | 50734.66  | 62320.32  | 75003.89  | 81894.5   | 82435.75  | 66518.38  |
| 69837.56  | 25752.22  | 36379.7   | 91225.55  | 44405.75  | 85888.38  | 81502.61  | 104762.6  | 65346     | 55606.44  |
| 123686.1  | 30136.93  | 37530.72  | 80539.11  | 46498.77  | 67099.08  | 81757.18  | 85589.22  | 70508.44  | 56355.23  |
| 103041.4  | 30540.8   | 40660.59  | 81459.52  | 47101.35  | 73342.78  | 76329.43  | 81931.19  | 73377.48  | 55775.01  |

|           |           |           |           |           |           |           |           |           |           |
|-----------|-----------|-----------|-----------|-----------|-----------|-----------|-----------|-----------|-----------|
| LP371.168 |
| 79818.1   | 110582.9  | 80567.7   | 86394.85  | 74405.14  | 113965.4  | 102319.9  | 82257.66  | 117534.8  | 110574.7  |
| 122638.6  | 86144.06  | 55307.4   | 114193.7  | 63163.73  | 86594.45  | 58889.77  | 58655.73  | 97780.88  | 125547.3  |
| 76287.53  | 82603.96  | 78131.8   | 81510.71  | 84528.61  | 79761.84  | 88880.06  | 58877.12  | 81645.68  | 119327.7  |
| 89760.42  | 73489.55  | 55530.07  | 90521.74  | 81796.71  | 98806.16  | 67870.39  | 63221.68  | 80868.41  | 88881.49  |
| 85262.77  | 87136.56  | 58785.1   | 99228.46  | 85636.31  | 88804.91  | 73880.67  | 64132.6   | 83880.21  | 100965    |

|           |           |           |           |           |           |           |           |           |           |
|-----------|-----------|-----------|-----------|-----------|-----------|-----------|-----------|-----------|-----------|
| LP371.168 | LP371.168 | LP371.168 | LP371.168 | LP371.168 | LP371.168 | LP371.167 | LP371.168 | LP371.168 | LP371.168 |
| 93997.65  | 57258.77  | 38396.94  | 69143.04  | 79178.78  | 80041.76  | 54049.16  | 49738.78  | 73202     | 82449.22  |
| 60876.77  | 56058.96  | 45375.8   | 88680.53  | 65638.56  | 86675.62  | 92947.08  | 57560.78  | 48061.15  | 74824.91  |
| 140145.8  | 53325.35  | 43916.75  | 57975.14  | 91841.79  | 67834.86  | 90224.13  | 57112.38  | 53147.44  | 68335.79  |
| 94055     | 64015.47  | 52896.03  | 55693.5   | 92908.12  | 88746.16  | 80966.5   | 49164.01  | 64158.17  | 84671.37  |
| 91430.43  | 63621.82  | 54623.28  | 64478.55  | 86168.16  | 81982.1   | 71787.57  | 50451.41  | 62960.21  | 80345.79  |

|           |           |           |           |           |           |           |           |           |           |           |
|-----------|-----------|-----------|-----------|-----------|-----------|-----------|-----------|-----------|-----------|-----------|
| LP371.168 |
| 79105.34  | 72539.64  | 96828.34  | 67598.9   | 82970.2   | 19812.75  | 75945.97  | 149422.6  | 107531.1  | 33466.67  |           |
| 54062.48  | 121567.6  | 63132.35  | 79287.27  | 93493.77  | 25782.29  | 131377.5  | 82634.12  | 133810.3  | 27754.16  |           |
| 51543.92  | 95840.44  | 62353.95  | 64876.11  | 74701.47  | 25726     | 83374.55  | 72845.83  | 121753    | 36833.93  |           |
| 54264.65  | 86167.26  | 62005.5   | 61913.46  | 86704.11  | 24217.51  | 87604.51  | 90556.89  | 81440.32  | 28244.95  |           |
| 57854.64  | 75566.48  | 60514.75  | 62027.41  | 91058.88  | 24583.63  | 84171.93  | 88652.59  | 81908.17  | 28927.52  |           |

|           |           |           |           |           |           |           |           |           |           |
|-----------|-----------|-----------|-----------|-----------|-----------|-----------|-----------|-----------|-----------|
| LP371.168 | LP371.168 | LP371.168 | LP371.168 | LP371.168 | LP371.163 | LP371.168 | LP371.168 | LP371.168 | LP371.168 |
| 70873.8   | 107325.5  | 43398.51  | 102169.5  | 51062.22  | 22009.87  | 77797.34  | 61628.51  | 98606.3   | 82663.71  |
| 128614.9  | 92634.02  | 56087.54  | 112742.7  | 70011.25  | 26252.99  | 51393.79  | 42450.63  | 125272.2  | 99402.16  |
| 77017.71  | 102991.5  | 62843.35  | 117907.3  | 59891.13  | 27222.3   | 89407.46  | 65999.59  | 114598.4  | 86601.1   |
| 90617.53  | 81320.81  | 39933.61  | 95404.76  | 62661.73  | 28337.35  | 64098.96  | 64085.69  | 98498.51  | 92463.28  |
| 94822.87  | 86493.3   | 40263.26  | 93001.97  | 63333.44  | 29827.75  | 66486.07  | 61004.95  | 102079.8  | 88539.58  |

|           |           |           |           |           |           |           |           |           |           |
|-----------|-----------|-----------|-----------|-----------|-----------|-----------|-----------|-----------|-----------|
| LP371.168 | LP371.168 | LP371.168 | LP371.168 | LP371.168 | LP371.167 | LP371.168 | LP371.168 | LP371.168 | LP371.168 |
| 95235.84  | 63574.06  | 37888.99  | 66165.58  | 37920.81  | 103746.8  | 84410.39  | 82494.62  | 99804.2   | 104345.6  |
| 89685.54  | 109183.4  | 48645.81  | 68537.88  | 28071.76  | 61821.49  | 90622.84  | 62187.32  | 87997.56  | 81917.96  |
| 94132.1   | 84260.24  | 38856.5   | 85048.96  | 30764.06  | 92071.95  | 65751.36  | 81812.23  | 94766.19  | 77627.24  |
| 96848.97  | 69608.93  | 27453.83  | 57576.02  | 31767.85  | 66351.19  | 72632.93  | 58297.63  | 87910.25  | 77269.7   |
| 92465.06  | 63652.85  | 31912.72  | 59371.24  | 32518.6   | 76480.59  | 75031.9   | 58352.9   | 99841.57  | 75035.71  |

|           |           |           |           |           |           |           |           |           |           |
|-----------|-----------|-----------|-----------|-----------|-----------|-----------|-----------|-----------|-----------|
| LP371.168 |
| 28383.27  | 42317.35  | 67175.5   | 123659.9  | 44779.48  | 42488.81  | 40529.13  | 59125.98  | 89793.31  | 24088.53  |
| 39313.31  | 38733.1   | 84530.5   | 61246.47  | 32654.6   | 32438.32  | 40435.07  | 66269.73  | 76945.32  | 44065.02  |
| 24134.19  | 34716.05  | 84007.13  | 105075.1  | 23581.43  | 27797.25  | 22507.59  | 76656.55  | 88700.15  | 33674.73  |
| 35074.05  | 39505.36  | 55501.1   | 97388.59  | 26218.57  | 28751.31  | 24727.48  | 59218.04  | 78064.67  | 36732.79  |
| 42068.38  | 39961.46  | 59377.35  | 102073    | 29919.78  | 32923.02  | 24509.77  | 61369.51  | 74531.7   | 36954.52  |



|           |           |           |           |           |           |           |           |           |           |
|-----------|-----------|-----------|-----------|-----------|-----------|-----------|-----------|-----------|-----------|
| LP371.168 |
| 88773.16  | 85183.88  | 61096     | 95093.28  | 66100.31  | 80427.03  | 61107.54  | 81879.64  | 51529.35  | 65152.27  |
| 81653.15  | 72611.76  | 59310.57  | 103752.3  | 57609.47  | 73975.69  | 50834.78  | 67565.89  | 50234.31  | 71559.87  |
| 97414.04  | 72758.91  | 47609.67  | 88532.92  | 74872.33  | 77002.79  | 114698.7  | 160112.8  | 63532.14  | 74184.22  |
| 93087.84  | 77343.17  | 59579.51  | 94782.06  | 64798.07  | 86693.57  | 47796.4   | 73140.61  | 55395.98  | 75073.18  |
| 93283.94  | 74978.69  | 55373.4   | 95662.94  | 65175.65  | 90216.26  | 50325.76  | 78419.5   | 61903.66  | 76678.66  |

|           |           |           |           |           |           |           |           |           |           |
|-----------|-----------|-----------|-----------|-----------|-----------|-----------|-----------|-----------|-----------|
| LP371.168 | LP371.205 | LP371.205 |
| 78370.81  | 30251.98  | 34247.01  | 94392.38  | 95275.62  | 35953.28  | 23716.72  | 58696.36  | 104644.9  | 99711.91  |
| 60732.57  | 34572.81  | 36361.14  | 79082.5   | 61587.9   | 21032.83  | 33057.23  | 61320.16  | 92531.46  | 106861.4  |
| 80751.71  | 32964.96  | 23506.91  | 103924.6  | 98423.72  | 21917.53  | 28002.26  | 64463.48  | 97429.97  | 104816    |
| 62924.07  | 30668.57  | 29309.9   | 76224.44  | 77500.88  | 20623.43  | 28536.53  | 60937.35  | 93705.3   | 98717.38  |
| 64011.84  | 31632.55  | 32651.8   | 84889.42  | 83388.59  | 22177.31  | 31093.38  | 61997.04  | 93182.32  | 98955.11  |

|           |           |           |           |           |           |           |           |           |           |
|-----------|-----------|-----------|-----------|-----------|-----------|-----------|-----------|-----------|-----------|
| LP371.205 | LP371.204 | LP371.204 | LP371.205 | LP371.205 | LP371.205 | LP371.204 | LP371.205 | LP371.204 | LP371.205 |
| 142714    | 65798.39  | 88380.72  | 86102.68  | 79100.98  | 83084.26  | 88059.44  | 43809.64  | 68169.56  | 83267.04  |
| 157608.3  | 68048.26  | 87132.06  | 83049.48  | 86219.61  | 75516.57  | 94883.68  | 42057.1   | 67531.14  | 78667.66  |
| 153573.7  | 62799.41  | 86458.56  | 79815.74  | 85964.42  | 75076.09  | 85668.13  | 38829.11  | 66746.4   | 74464.94  |
| 147047.7  | 61089.01  | 83645.58  | 83808.86  | 79357.06  | 77654.36  | 85458.02  | 36520.66  | 63341.14  | 76510.67  |
| 144824.3  | 64619.9   | 93168.36  | 71650.41  | 83630.33  | 77201.08  | 86356.68  | 41068.77  | 65428.87  | 84308.54  |

|           |           |           |           |           |           |           |           |           |           |
|-----------|-----------|-----------|-----------|-----------|-----------|-----------|-----------|-----------|-----------|
| LP371.204 | LP371.204 | LP371.205 | LP371.205 | LP371.205 | LP371.205 | LP371.204 | LP371.204 | LP371.205 | LP371.205 |
| 64169.25  | 67296.76  | 59855.57  | 23748.51  | 58182.26  | 120309    | 89070.66  | 68002.92  | 113686    | 58534.82  |
| 69334.01  | 63332.31  | 61098.37  | 21181.67  | 60628.76  | 120226.1  | 78891.25  | 77159.74  | 119005.7  | 58070.75  |
| 64293.19  | 67559.24  | 60907.92  | 23525.15  | 64435.84  | 116929.2  | 91063.18  | 76248.07  | 109712.4  | 53685.95  |
| 69895.96  | 58856.34  | 57228.19  | 21158.14  | 58325.72  | 127753.9  | 82792.37  | 75034.19  | 109076.9  | 52951.69  |
| 60828.75  | 67133.41  | 56949.61  | 21713.24  | 54816.51  | 127680.4  | 85353.8   | 69952.23  | 113824.6  | 49817.96  |

|           |           |           |           |           |           |           |           |           |           |           |
|-----------|-----------|-----------|-----------|-----------|-----------|-----------|-----------|-----------|-----------|-----------|
| LP371.205 | LP371.205 | LP371.204 | LP371.205 | LP371.204 | LP371.204 | LP371.204 | LP371.204 | LP371.204 | LP371.205 | LP371.204 |
| 112298.4  | 95792.43  | 65014.72  | 77938.33  | 58719.21  | 70303.65  | 54570.47  | 52840.4   | 29020     | 75584.67  |           |
| 108755.3  | 88619.14  | 56417.76  | 78001.27  | 58117.4   | 66813.08  | 64350.52  | 47984.25  | 28042.78  | 78608.99  |           |
| 111988.1  | 89683.92  | 55148.52  | 77130.98  | 69801.09  | 68815.84  | 53416.09  | 54358.01  | 24733.61  | 75994.97  |           |
| 106293.7  | 95896.25  | 50054.66  | 87739.59  | 63720.45  | 69330.16  | 56017.5   | 53633.21  | 28653.06  | 75892.52  |           |
| 116678.5  | 92187.74  | 61720.76  | 81185.66  | 66046.54  | 63873.52  | 56891.76  | 54356.65  | 25504.19  | 81150.37  |           |

|           |           |           |           |           |           |           |           |           |           |
|-----------|-----------|-----------|-----------|-----------|-----------|-----------|-----------|-----------|-----------|
| LP371.205 | LP371.205 | LP371.204 | LP371.205 | LP371.205 | LP371.204 | LP371.204 | LP371.204 | LP371.204 | LP371.204 |
| 20893.18  | 103287.8  | 62453.73  | 68372.88  | 48549.69  | 51496.99  | 62325.88  | 76363.41  | 57639.84  | 61573     |
| 24076.7   | 98555.54  | 65216.88  | 67962.37  | 55396.94  | 49847.57  | 58326.64  | 75358.71  | 56990.21  | 57041.86  |
| 21063.45  | 94547.3   | 66411.5   | 67513.35  | 50600.44  | 48222.32  | 54408.3   | 75969.67  | 53848.22  | 55310.63  |
| 20505.15  | 98627.23  | 68127.26  | 76682.22  | 51303.67  | 47814.48  | 58108.12  | 74043.34  | 50824.57  | 55335.93  |
| 25335.69  | 96843.57  | 67355.38  | 78417.36  | 52086.04  | 50332.13  | 60103.08  | 73126.24  | 53252.87  | 59733.68  |

|           |           |           |           |           |           |           |           |           |           |
|-----------|-----------|-----------|-----------|-----------|-----------|-----------|-----------|-----------|-----------|
| LP371.204 | LP371.204 | LP371.204 | LP371.204 | LP371.205 | LP371.205 | LP371.205 | LP371.204 | LP371.205 | LP371.204 |
| 68270.27  | 62110.79  | 56870.8   | 105136.6  | 54811.62  | 37947.81  | 27973.44  | 65424.37  | 76339.98  | 66721.33  |
| 72066.48  | 64426.78  | 60603.06  | 100198.7  | 52741.26  | 38971.37  | 25310.43  | 67719.37  | 81881.22  | 72312.89  |
| 70227.91  | 69233.31  | 63486.56  | 101796    | 54359.12  | 32808.68  | 28633.52  | 62913.56  | 82512.65  | 64504.15  |
| 70164.14  | 59029.91  | 62290.69  | 97609.48  | 50910.07  | 31902.52  | 21930.62  | 64930.19  | 75490.64  | 66284.24  |
| 64356.03  | 62895.4   | 57146.54  | 105612.4  | 55617.57  | 33353.16  | 27597.57  | 57246.57  | 76754.55  | 71735     |

|           |           |           |           |           |           |           |           |           |           |
|-----------|-----------|-----------|-----------|-----------|-----------|-----------|-----------|-----------|-----------|
| LP371.205 | LP371.204 | LP371.205 | LP371.205 | LP371.205 | LP371.204 | LP371.204 | LP371.204 | LP371.204 | LP371.204 |
| 37529.7   | 64254.75  | 29011.91  | 19788.97  | 30475.46  | 73446.79  | 80940.64  | 127611.1  | 62410.07  | 63222.42  |
| 40466.94  | 57243.73  | 28587.55  | 17254.24  | 32688.23  | 73034.57  | 91521.06  | 127225.6  | 69488.37  | 74651.59  |
| 43566.6   | 61997.48  | 26257.91  | 15839.76  | 25915.6   | 79373.6   | 90360.8   | 116790.6  | 66852.19  | 69869.65  |
| 34613.39  | 58103.91  | 26142.9   | 14514.32  | 28971     | 84145.26  | 94402.35  | 117116.7  | 58867.53  | 68379.76  |
| 40239.13  | 55261.5   | 28137.56  | 17190.7   | 29614.55  | 76149.38  | 90858.18  | 116512.2  | 68042.05  | 66981.39  |



|           |           |           |           |           |           |           |           |           |           |
|-----------|-----------|-----------|-----------|-----------|-----------|-----------|-----------|-----------|-----------|
| LP371.204 | LP371.205 | LP371.205 | LP371.204 |
| 55727.45  | 63251.43  | 69051.79  | 71752.94  | 120707    | 54702.82  | 93003.28  | 33263.01  | 71869.42  | 48788.01  |
| 53819.86  | 62432.68  | 67318.36  | 80626.75  | 120387.7  | 46637.33  | 95982.08  | 33256.86  | 68629.31  | 50829.47  |
| 56147.25  | 65607.25  | 63561.71  | 70036.77  | 119697.9  | 51850.07  | 103067.5  | 32476.92  | 64102.33  | 51632.03  |
| 54445.74  | 61743.77  | 69787.09  | 76405.51  | 116524.9  | 46055.02  | 96055.86  | 27696.9   | 61155.27  | 50959.61  |
| 58419.65  | 67137.69  | 70495.66  | 75411.27  | 124251.9  | 51564.15  | 94546.73  | 30729.02  | 67582.97  | 48488.12  |

|           |           |           |           |           |           |           |           |           |           |
|-----------|-----------|-----------|-----------|-----------|-----------|-----------|-----------|-----------|-----------|
| LP371.205 | LP371.204 | LP371.204 | LP371.205 | LP371.204 | LP371.204 | LP371.205 | LP371.204 | LP371.204 | LP371.204 |
| 115137.5  | 52296.81  | 95012.7   | 19414.7   | 74123.25  | 132032.2  | 70599.48  | 70434.91  | 69165.39  | 82126.97  |
| 116843.2  | 47868.97  | 98531.57  | 21431.82  | 78364.87  | 129467.2  | 73607.02  | 67862.21  | 68207.92  | 86109.62  |
| 103219.1  | 48960.41  | 99176.64  | 18832.06  | 72149.24  | 126697.4  | 64134.38  | 69191.15  | 69049.96  | 79002     |
| 101342.6  | 44889     | 105407.2  | 17768.63  | 69483.56  | 128562.4  | 68541.39  | 69795.83  | 69397.92  | 77967.6   |
| 107529.3  | 48882.85  | 99719.02  | 19249.78  | 72593.26  | 134674.7  | 70379     | 70166.21  | 68813.7   | 84529.84  |

|           |           |           |           |           |           |           |           |           |           |
|-----------|-----------|-----------|-----------|-----------|-----------|-----------|-----------|-----------|-----------|
| LP371.222 | LP371.315 |
| 56244.54  | 1815601   | 724843.5  | 444753.5  | 637424.7  | 668213.1  | 172973.9  | 175902.9  | 117232.6  | 165502.4  |
| 57032.26  | 1037678   | 627594.2  | 482660.5  | 903848.3  | 687858.2  | 121253.7  | 181554.4  | 120281.6  | 168452    |
| 49181.82  | 1174772   | 572749.2  | 487550.1  | 621546.8  | 1150229   | 101736    | 217368.4  | 109751.8  | 154384.3  |
| 28533.43  | 1161817   | 697413    | 341611.4  | 629755.8  | 631707.3  | 139968.5  | 207832.3  | 101578.2  | 155583.7  |
| 59717.54  | 891628.3  | 806390.5  | 331505.2  | 687555.3  | 625363.6  | 188690.7  | 198077.6  | 116246.5  | 155061.2  |

|           |           |           |           |           |           |           |           |           |           |
|-----------|-----------|-----------|-----------|-----------|-----------|-----------|-----------|-----------|-----------|
| LP371.315 | LP371.316 | LP371.316 |
| 140697.2  | 154972.4  | 120157.7  | 212328.5  | 204296.5  | 136719.7  | 140181.5  | 170807.8  | 152179.6  | 202508.2  |
| 151939.7  | 154821    | 127052.2  | 219420.6  | 177613.7  | 133344.4  | 126537.3  | 159284.1  | 173309.4  | 229683    |
| 229030.1  | 134854.6  | 115763.8  | 236454.9  | 165102    | 140241.7  | 133719    | 157831.5  | 156070.3  | 227665.3  |
| 134319.6  | 125409    | 122583    | 232351.2  | 159734.8  | 138559.4  | 116382.8  | 158698.9  | 155986.4  | 228253.5  |
| 131258.2  | 120336.1  | 118197.8  | 232952.7  | 161137.6  | 177753.6  | 135704.1  | 177571.7  | 174298.8  | 234057.4  |

|           |           |           |           |           |           |           |           |           |           |
|-----------|-----------|-----------|-----------|-----------|-----------|-----------|-----------|-----------|-----------|
| LP371.316 | LP371.315 | LP371.315 | LP371.316 | LP371.315 | LP371.316 | LP371.316 | LP371.316 | LP371.316 | LP371.316 |
| 173985.5  | 192617.2  | 227743.3  | 128449    | 136637.7  | 135184.7  | 149108.4  | 126777.6  | 136573.6  | 96502.79  |
| 173964.4  | 253404.7  | 224514.6  | 131798.1  | 114471.5  | 148842.5  | 174917.8  | 131270.6  | 141895.8  | 89607.66  |
| 173063    | 180261.2  | 211806.2  | 124631.5  | 141425.5  | 134735.4  | 170618    | 136919.6  | 128017.5  | 92143.37  |
| 177468.7  | 193047.9  | 226789    | 145765.1  | 123388.6  | 127617.3  | 155174.4  | 134462.1  | 142851.2  | 101334.1  |
| 185580.1  | 199228.8  | 218636.8  | 140692.8  | 137242.3  | 153453.3  | 165050.1  | 131815.1  | 145729.8  | 93553.14  |

|           |           |           |           |           |           |           |           |           |           |
|-----------|-----------|-----------|-----------|-----------|-----------|-----------|-----------|-----------|-----------|
| LP371.316 | LP371.316 | LP371.371 | LP371.400 | LP371.399 | LP372.101 | LP372.101 | LP372.257 | LP372.257 | LP372.257 |
| 138978    | 149307.1  | 30154.15  | 10855.94  | 25171.14  | 40265.33  | 22479.69  | 35087.3   | 44605.65  | 92090.26  |
| 155745.9  | 162058    | 27223.07  | 10998.53  | 23244.66  | 36328.95  | 21964.61  | 33596.19  | 48752.49  | 87113.54  |
| 152667.3  | 161258.5  | 23935.31  | 17730.91  | 18597.5   | 35242.24  | 19597.46  | 36539.25  | 55970.31  | 90411.01  |
| 151525.4  | 168408.7  | 33182.59  | 20539.54  | 24080.34  | 33560.56  | 20018.65  | 33674.05  | 50099.25  | 90227.75  |
| 164380.7  | 167071.9  | 24293.56  | 22801.82  | 19447.26  | 41499.44  | 20455.81  | 35022.58  | 45043.26  | 85366.42  |

|           |           |           |           |           |           |           |           |           |           |
|-----------|-----------|-----------|-----------|-----------|-----------|-----------|-----------|-----------|-----------|
| LP372.257 | LP372.257 | LP372.257 | LP372.257 | LP372.274 | LP372.274 | LP372.274 | LP372.274 | LP372.274 | LP372.274 |
| 52011.48  | 54611.66  | 42678.88  | 33898.83  | 37238.19  | 40470.11  | 71095.23  | 50511.48  | 58248.04  | 60156.27  |
| 49215.83  | 46596.36  | 46858.25  | 35520.1   | 59933.58  | 61756     | 68797.85  | 63470.91  | 63115.41  | 54969.3   |
| 46221.08  | 52097.64  | 44082.41  | 33968.38  | 48989.93  | 53252.14  | 71519.29  | 61047.81  | 67115.9   | 64071.55  |
| 49493.23  | 50400.21  | 48458.94  | 31396.47  | 63830.13  | 52311.21  | 66551.58  | 61456.48  | 62737.83  | 62748.59  |
| 45767.94  | 47450.01  | 43949.42  | 34772.26  | 56796.77  | 54934.51  | 74489.89  | 67993.84  | 62057.15  | 57711.88  |

|           |           |           |           |           |           |           |           |           |           |
|-----------|-----------|-----------|-----------|-----------|-----------|-----------|-----------|-----------|-----------|
| LP372.274 |
| 42741.04  | 49547.99  | 48688     | 55257.24  | 53283.17  | 77607.2   | 49597.57  | 31505.86  | 42660.13  | 62746.77  |
| 56169.61  | 52660.4   | 42635.19  | 45010.65  | 49464.04  | 56535.25  | 49615     | 33678.49  | 49151.96  | 50369.86  |
| 53869     | 54557.29  | 41035.61  | 51753.13  | 46345.18  | 61652.57  | 47613.01  | 30774.87  | 37440.54  | 58685.55  |
| 54714.07  | 48822.55  | 43536.7   | 49363.56  | 67819.87  | 55360.8   | 45864.13  | 33924.72  | 44753.98  | 54914.27  |
| 49429.31  | 51365.03  | 44629.16  | 43541.26  | 45767.94  | 57595.68  | 43723.58  | 31576.49  | 45185.68  | 57078.6   |



|           |           |           |           |           |           |           |           |           |           |
|-----------|-----------|-----------|-----------|-----------|-----------|-----------|-----------|-----------|-----------|
| LP372.274 |
| 45299.17  | 45883.13  | 38394.98  | 45739.37  | 52188.19  | 53228.56  | 47549.13  | 48365     | 59297.2   | 47920.98  |
| 46728.06  | 41530.41  | 42184.06  | 53059.67  | 48214.87  | 45654.06  | 43133.68  | 56763.44  | 40414.21  | 137826.7  |
| 44735.59  | 39987.6   | 43017.31  | 53037.38  | 48381.37  | 45808.15  | 37989.87  | 51986.26  | 44441.15  | 142393.4  |
| 42167.43  | 42602.47  | 42024.91  | 44599.43  | 51967.17  | 42986.45  | 39752.56  | 49464.51  | 42466.81  | 141651.8  |
| 43300.52  | 43439.68  | 37192.23  | 49079.21  | 48010.98  | 44288.5   | 38755.52  | 49980.21  | 40029.2   | 151326.5  |

|           |           |           |           |           |           |           |           |           |           |
|-----------|-----------|-----------|-----------|-----------|-----------|-----------|-----------|-----------|-----------|
| LP372.274 |
| 43199.38  | 38556.32  | 59830.84  | 43171.11  | 38053.79  | 34820.89  | 42876.97  | 82822.86  | 56768.75  | 55315.67  |
| 50944.52  | 43229.33  | 50736.62  | 50194.52  | 37335.46  | 33968.4   | 43429.12  | 62888.52  | 113993    | 42740.35  |
| 51991.83  | 46570.93  | 55523.46  | 47919.11  | 39150.38  | 34213.84  | 49366.08  | 64786.5   | 98570.32  | 42030.16  |
| 48971.02  | 51487.76  | 49600.68  | 45148.05  | 31442.22  | 39881.62  | 48950.07  | 64097.87  | 103917.4  | 43780.02  |
| 49938.59  | 49420.99  | 53626.43  | 47741.19  | 36449.75  | 35949.99  | 43560.66  | 69493.37  | 94105.94  | 45369.77  |

|           |           |           |           |           |           |           |           |           |           |
|-----------|-----------|-----------|-----------|-----------|-----------|-----------|-----------|-----------|-----------|
| LP372.274 |
| 46921.24  | 36344.08  | 57319.03  | 49534.52  | 72409.92  | 41801.23  | 38538.06  | 44334.96  | 35067.65  | 39511.09  |
| 45903.39  | 30873.42  | 52232.38  | 38719.5   | 57915.54  | 40258.23  | 33425.57  | 41991.19  | 31556.01  | 39941.32  |
| 44015.23  | 30484.77  | 54099.92  | 43228.02  | 61663.66  | 42417.45  | 34900.11  | 43440.88  | 30893.63  | 38040.15  |
| 46035.98  | 30321.52  | 51891.14  | 36893.61  | 59815.09  | 42294.33  | 36541.8   | 44285.14  | 35257.28  | 38730.99  |
| 47940.89  | 29733.85  | 51210.96  | 42177.84  | 59753.32  | 43316.13  | 36075.53  | 43755.4   | 37110.71  | 39014.04  |

|           |           |           |           |           |           |           |           |           |           |
|-----------|-----------|-----------|-----------|-----------|-----------|-----------|-----------|-----------|-----------|
| LP372.274 |
| 37713.67  | 42334     | 40597.78  | 32949.42  | 30017.39  | 48620.28  | 46691.85  | 41140.23  | 31597.1   | 31323.85  |
| 32659.61  | 36461.39  | 41048.42  | 36496.56  | 30702.4   | 48961.44  | 44639.36  | 43042.38  | 31302.22  | 28376.52  |
| 30440.84  | 43040.89  | 40203.37  | 34507.14  | 29757.53  | 47299.29  | 38071.88  | 37833.44  | 27546.74  | 30564.17  |
| 31601.35  | 38175.19  | 39004.81  | 38888.87  | 29242.69  | 40614.73  | 42253.05  | 43911.92  | 29725.59  | 33337.03  |
| 30942.64  | 34328.06  | 36441.06  | 32348.49  | 25869.74  | 40917.67  | 37965.87  | 37539.51  | 29478.63  | 27162.23  |

|           |           |           |           |           |           |           |           |           |           |
|-----------|-----------|-----------|-----------|-----------|-----------|-----------|-----------|-----------|-----------|
| LP372.274 |
| 49071.04  | 35254.83  | 32406.9   | 119181.9  | 32608.63  | 39997.12  | 45672.76  | 47663.46  | 49453     | 30084.84  |
| 79933.32  | 35169.16  | 30477.96  | 117201.2  | 31395.74  | 44114.28  | 36244.5   | 106925.7  | 116917.3  | 29000.58  |
| 79973.72  | 30154.58  | 34269.18  | 116025.7  | 34025.63  | 45952.54  | 42260.65  | 98142.51  | 124429.2  | 28526.3   |
| 78803.96  | 36122.08  | 32586.13  | 112350.8  | 38110.93  | 40842     | 36296.78  | 92989.25  | 110869    | 35922.91  |
| 76974.81  | 30404.47  | 29593.66  | 119176.7  | 31927.22  | 41965.16  | 42149.77  | 85861.51  | 105806.6  | 30171.65  |

|           |           |           |           |           |           |           |           |           |           |
|-----------|-----------|-----------|-----------|-----------|-----------|-----------|-----------|-----------|-----------|
| LP372.274 |
| 54591.79  | 46949.74  | 39078.54  | 46657.92  | 38812.6   | 42649.62  | 51188.49  | 31271.02  | 30955.69  | 63579.61  |
| 50657.04  | 43735.15  | 38733.41  | 43228.81  | 40538.87  | 41016.41  | 41468.41  | 28632.41  | 28484.15  | 80630.68  |
| 55228.17  | 52012.11  | 39000.44  | 48494.04  | 35589.36  | 40981.16  | 40649.6   | 28029.13  | 35427.67  | 73259.34  |
| 55278.82  | 47115.97  | 42334.3   | 42845.87  | 39447.85  | 40056.71  | 42093.47  | 32397.17  | 32393.36  | 75543.44  |
| 55439.63  | 43936.72  | 38528.24  | 44774.72  | 48710.25  | 38438.93  | 45980.74  | 25316.4   | 29738.08  | 72346.46  |

|           |           |           |           |           |           |           |           |           |           |
|-----------|-----------|-----------|-----------|-----------|-----------|-----------|-----------|-----------|-----------|
| LP372.274 | LP372.274 | LP372.274 | LP372.274 | LP372.310 | LP372.319 | LP372.347 | LP372.347 | LP372.882 | LP372.882 |
| 44396.27  | 42891.33  | 33536.22  | 39580.14  | 316714.7  | 251474.4  | 137212.4  | 230912.4  | 29354.04  | 23327.52  |
| 43346.77  | 143739    | 36818.12  | 36393.1   | 321794.4  | 250233.7  | 114896.7  | 326258.6  | 24122.89  | 21113.22  |
| 41163.65  | 132143.5  | 36563.07  | 36846.99  | 296189.1  | 255559.5  | 116742.4  | 279746.7  | 35104.96  | 27309.06  |
| 42976.46  | 130702.6  | 36465.47  | 36616.72  | 297695.2  | 257462.2  | 120623    | 283066.3  | 31491.82  | 24850.47  |
| 42032.71  | 148326.3  | 31292.94  | 33029.91  | 289760.7  | 240902.2  | 129080.6  | 217718.1  | 20604.62  | 22144.98  |

|           |           |           |           |           |           |           |           |           |           |
|-----------|-----------|-----------|-----------|-----------|-----------|-----------|-----------|-----------|-----------|
| LP372.882 | LP372.882 | LP372.882 | LP372.882 | LP372.882 | LP373.098 | LP373.098 | LP373.098 | LP373.098 | LP373.183 |
| 26893.09  | 27399.51  | 19449.44  | 22442.25  | 24336.25  | 38534.05  | 25672.69  | 15588.75  | 17670.54  | 69335.24  |
| 25307.18  | 24917.56  | 21364.42  | 17698.51  | 22781.59  | 34766.32  | 27983.11  | 15253.09  | 13393.45  | 60342.27  |
| 29912.44  | 36260.8   | 23133.63  | 27865.56  | 32932.63  | 49692.13  | 23973.41  | 14648.28  | 14012.79  | 68797.03  |
| 32997.72  | 36409.41  | 23888.71  | 28035.96  | 32759.72  | 65290.66  | 25648.8   | 10693.77  | 8611.867  | 64915.41  |
| 22960.2   | 26865.46  | 18441.73  | 18228.03  | 21458.24  | 55539.5   | 25932.04  | 18675.93  | 16393.28  | 60165.48  |



|           |           |           |           |           |           |           |           |           |           |
|-----------|-----------|-----------|-----------|-----------|-----------|-----------|-----------|-----------|-----------|
| LP373.184 | LP373.183 | LP373.183 | LP373.183 | LP373.204 | LP373.295 | LP373.314 | LP373.331 | LP373.350 | LP373.350 |
| 129467.5  | 76883.82  | 63037.51  | 50491.56  | 32887.68  | 14737.58  | 30765.03  | 21674.8   | 50814.86  | 24661.13  |
| 126576.9  | 70546.72  | 65634.95  | 52514.18  | 35264.43  | 8248.368  | 32472.69  | 23881.03  | 65033.86  | 22346.63  |
| 137466.2  | 72240.87  | 51859.92  | 60695.15  | 30379.94  | 12034.46  | 32888.2   | 22879.35  | 51920.84  | 24753.82  |
| 130608.7  | 64627.11  | 68990.6   | 49833.8   | 28436.17  | 8228.586  | 25388.28  | 20193.01  | 50020.96  | 16175.93  |
| 135745.5  | 68557.2   | 50111.42  | 43511.73  | 34153     | 10774.52  | 25649.14  | 19024.83  | 46979.07  | 18639.1   |

|           |           |           |           |           |           |           |           |           |           |
|-----------|-----------|-----------|-----------|-----------|-----------|-----------|-----------|-----------|-----------|
| LP374.098 | LP374.217 | LP374.217 | LP374.253 | LP374.254 | LP374.254 | LP374.253 | LP374.254 | LP374.254 | LP374.253 |
| 29027.98  | 34283.46  | 49571.31  | 88805     | 75440.14  | 96675.52  | 83603.53  | 98292.16  | 71526.24  | 93087.32  |
| 29242.54  | 36434.2   | 57822.68  | 86155.86  | 79378.12  | 117355.8  | 68782.03  | 97353.35  | 110172.7  | 87346.56  |
| 33331.84  | 33647.21  | 57027.19  | 118992.9  | 154875.4  | 86876.55  | 63723.05  | 128709    | 71057.48  | 82842.68  |
| 34107.22  | 33803.36  | 60196.31  | 66204.6   | 83555.6   | 92325.6   | 70156.58  | 97633.64  | 77869.19  | 68276.38  |
| 33460.06  | 34155.56  | 59214.88  | 92235.11  | 82295.36  | 74801.91  | 73221.28  | 90213.57  | 63392.56  | 83747.16  |

|           |           |           |           |           |           |           |           |           |           |
|-----------|-----------|-----------|-----------|-----------|-----------|-----------|-----------|-----------|-----------|
| LP374.254 | LP374.254 | LP374.253 | LP374.253 | LP374.253 | LP374.253 | LP374.254 | LP374.254 | LP374.254 | LP374.254 |
| 85095.58  | 82741.43  | 71535.2   | 70433.69  | 78827.26  | 76563.5   | 99400.57  | 104081.5  | 83055.96  | 81086.16  |
| 77822.35  | 86170.65  | 66332.62  | 149982.3  | 82324.81  | 73866.48  | 101493.6  | 91711.1   | 104799.2  | 76569.89  |
| 73874.66  | 100180.3  | 67094.1   | 95020.62  | 84261.81  | 56441.08  | 83390.35  | 102518.7  | 87692.44  | 81747.44  |
| 71949.62  | 83695.55  | 61662.29  | 94921.16  | 76015.63  | 79937.01  | 98595.54  | 102559.6  | 85072.37  | 79585.85  |
| 84802.66  | 84452.55  | 64888.16  | 87240.79  | 79240.66  | 60739.02  | 107460.8  | 102240.2  | 85221.16  | 80719.13  |

|           |           |           |           |           |           |           |           |           |           |
|-----------|-----------|-----------|-----------|-----------|-----------|-----------|-----------|-----------|-----------|
| LP374.254 | LP374.253 | LP374.254 |
| 96242.22  | 98445.52  | 80475.54  | 76051.53  | 69293.65  | 61386.5   | 70520.28  | 75414.76  | 78869.2   | 74142.03  |
| 78931.71  | 101964.3  | 80855.74  | 76140.84  | 70180.71  | 66429.61  | 75793.33  | 68042.54  | 76333.37  | 83197.6   |
| 73739.3   | 99678.8   | 103257.5  | 77818.89  | 74424.47  | 66808.21  | 69534.44  | 69187.51  | 78414.51  | 86225.28  |
| 72574.71  | 94700.89  | 80969.46  | 72260.76  | 78624.6   | 71481.67  | 89802.68  | 78997.69  | 76578.28  | 84044.34  |
| 79140.93  | 93889.43  | 84213.17  | 71483.12  | 64437.06  | 61372.18  | 67760.79  | 79113.22  | 67455.71  | 82338.06  |

|           |           |           |           |           |           |           |           |           |           |
|-----------|-----------|-----------|-----------|-----------|-----------|-----------|-----------|-----------|-----------|
| LP374.254 |
| 59325.15  | 65757.5   | 80472.75  | 91954.09  | 93222.45  | 57481.83  | 97899.14  | 66425.86  | 66633.26  | 91412.26  |
| 53462.59  | 72507.29  | 71915.14  | 85585.13  | 90101.8   | 58027.94  | 89761.2   | 66306.1   | 63533.85  | 86396.98  |
| 60227.3   | 68872.51  | 77489.43  | 85286.3   | 79800     | 65069.24  | 92634.4   | 67479.89  | 70597.55  | 93006.35  |
| 59623.57  | 63002.57  | 84600.03  | 88040.44  | 86388.02  | 67465.95  | 93447.56  | 76652.66  | 68744.03  | 86375.96  |
| 53460.75  | 90642.77  | 79465.69  | 94401.63  | 89166.87  | 59634.96  | 94582.93  | 66087.4   | 68574.71  | 93572.35  |

|           |           |           |           |           |           |           |           |           |           |
|-----------|-----------|-----------|-----------|-----------|-----------|-----------|-----------|-----------|-----------|
| LP374.254 | LP374.253 | LP374.254 |
| 81508.96  | 85871.5   | 92673.66  | 75950.91  | 96758.87  | 69205.44  | 70055.04  | 77162.47  | 81097.49  | 92586.87  |
| 80899.8   | 96761.34  | 95436.28  | 67379.83  | 82176.17  | 65636.5   | 68680.9   | 73542.87  | 84526.95  | 67936     |
| 74960.32  | 95398.03  | 94098.02  | 78499.3   | 88124.26  | 68608.03  | 71854.31  | 91022.76  | 78030.63  | 89791.21  |
| 77500.21  | 87059.3   | 91766.33  | 72585.25  | 91094.31  | 65414.99  | 74186.9   | 73980.23  | 86160.41  | 94718.89  |
| 78962.41  | 84603.5   | 94831.64  | 68261.11  | 90310.32  | 63888.62  | 67363.11  | 80155.52  | 77450.86  | 114083.4  |

|           |           |           |           |           |           |           |           |           |           |
|-----------|-----------|-----------|-----------|-----------|-----------|-----------|-----------|-----------|-----------|
| LP374.254 | LP374.254 | LP374.254 | LP374.254 | LP374.253 | LP374.254 | LP374.254 | LP374.254 | LP374.254 | LP374.254 |
| 62541.79  | 76703.63  | 102592.5  | 75184.41  | 91078.09  | 67644.38  | 61420.43  | 81056.59  | 74289.77  | 69873.82  |
| 58634.82  | 74461.41  | 99212.96  | 72099.67  | 68592.79  | 53719.92  | 70832.56  | 81710.02  | 73889.57  | 67066.48  |
| 60204.43  | 75016.09  | 96343.49  | 75700.05  | 72534.53  | 60637.95  | 71930.23  | 74765.88  | 74362.96  | 67632.64  |
| 59694.66  | 78136.64  | 100946    | 70636.75  | 88075.28  | 56336.93  | 66152.59  | 78637.39  | 72329.57  | 61957.01  |
| 59513.02  | 73731.31  | 101167.3  | 74833.98  | 74145.7   | 60493.44  | 63595.46  | 78412.35  | 74147.79  | 62437.41  |

|           |           |           |           |           |           |           |           |           |           |
|-----------|-----------|-----------|-----------|-----------|-----------|-----------|-----------|-----------|-----------|
| LP374.254 | LP374.254 | LP374.254 | LP374.254 | LP374.253 | LP374.254 | LP374.254 | LP374.253 | LP374.254 | LP374.254 |
| 97659.17  | 74436.74  | 76445.19  | 109877.7  | 82077.49  | 87647.65  | 59400.02  | 55228.53  | 62891.06  | 104647.2  |
| 91074.46  | 68816.9   | 77135.47  | 117187.7  | 77898.71  | 84343.32  | 61140.64  | 65381.83  | 66019.95  | 100796.1  |
| 90492.2   | 66421.37  | 78124.92  | 116005.6  | 81644     | 89961.5   | 64401.38  | 56835.94  | 65544.28  | 97741.6   |
| 88951.3   | 76126.42  | 78420.56  | 111948    | 86467.54  | 86091.41  | 62920.82  | 60069.96  | 65291.43  | 103099.5  |
| 88680.1   | 68567.93  | 68987.82  | 108094    | 82229.4   | 84572.63  | 66425.49  | 58523.52  | 65185.04  | 95872.9   |



|           |           |           |           |           |           |           |           |           |           |
|-----------|-----------|-----------|-----------|-----------|-----------|-----------|-----------|-----------|-----------|
| LP374.254 | LP374.254 | LP374.254 | LP374.254 | LP374.29_ | LP374.29_ | LP374.29_ | LP374.290 | LP374.290 | LP374.290 |
| 81791.49  | 58092.92  | 54643.94  | 122598.9  | 115106    | 103551.2  | 77774.53  | 49331.28  | 70155.39  | 87905.84  |
| 76943.71  | 61202.66  | 56531.63  | 119202.9  | 98471.02  | 85962.88  | 83430.33  | 57251.44  | 69395.38  | 92711.4   |
| 78523.9   | 64792.36  | 55685.17  | 129517    | 107724.9  | 107772    | 80481.71  | 50451.71  | 67410.51  | 93743.3   |
| 79773.77  | 63123.08  | 54958.55  | 125768.6  | 103101.7  | 96706.48  | 91204.79  | 56985.15  | 69126.15  | 91384.68  |
| 84224.5   | 59961.82  | 59972.26  | 125330.3  | 105970.9  | 97028.52  | 71504.26  | 50316.14  | 68324.4   | 84888.67  |

|           |           |           |           |           |           |           |           |           |           |
|-----------|-----------|-----------|-----------|-----------|-----------|-----------|-----------|-----------|-----------|
| LP374.289 | LP374.290 |
| 52052.33  | 97564.11  | 69437.87  | 66870.98  | 106113.5  | 69681.84  | 84828     | 59481.98  | 112196.2  | 73474.84  |
| 48830.77  | 96161.56  | 71106.53  | 59779.11  | 96856.89  | 62611.18  | 83964.04  | 57112.5   | 109439.1  | 74486.2   |
| 41677.92  | 85678.92  | 68357.01  | 64452.42  | 106807.2  | 68173.08  | 83058.18  | 50359.66  | 119959.4  | 72994.33  |
| 50386.82  | 86785.2   | 73530.94  | 64955.04  | 101121.5  | 69905.95  | 83655.55  | 48976.86  | 125571.9  | 75860.04  |
| 51520.88  | 98114.37  | 69863.51  | 67677.6   | 91626.45  | 68463.28  | 79833.32  | 50877.2   | 106888    | 74530.15  |

|           |           |           |           |           |           |           |           |           |           |
|-----------|-----------|-----------|-----------|-----------|-----------|-----------|-----------|-----------|-----------|
| LP374.290 | LP374.290 | LP374.290 | LP374.290 | LP374.290 | LP374.290 | LP374.289 | LP374.290 | LP374.290 | LP374.290 |
| 80848.06  | 54614.59  | 90460.26  | 79393.04  | 120187.5  | 89493.9   | 91014.48  | 108157.3  | 91763.98  | 107589.9  |
| 73401.73  | 49511.15  | 79590.06  | 76406.44  | 115170.4  | 92498.58  | 74481.35  | 90593.61  | 104691.7  | 91748.24  |
| 75611.31  | 50269.23  | 82198.05  | 72409.9   | 118650.7  | 94966.34  | 79500.08  | 97645.03  | 98264.77  | 101332.6  |
| 76316.95  | 54441.1   | 84319.04  | 75368.52  | 115847.7  | 86183.01  | 84573.42  | 116965.4  | 94904.58  | 100059.9  |
| 85584.94  | 52890.72  | 79259.14  | 75461.74  | 117655.4  | 88666.72  | 90495.13  | 103538.6  | 90441.01  | 107012.3  |

|           |           |           |           |           |           |           |           |           |           |
|-----------|-----------|-----------|-----------|-----------|-----------|-----------|-----------|-----------|-----------|
| LP374.290 | LP374.290 | LP374.303 | LP374.326 | LP375.162 | LP375.162 | LP375.162 | LP375.162 | LP375.162 | LP375.162 |
| 81241.99  | 102381.2  | 90114.15  | 109139.7  | 39789.63  | 48064.96  | 32348.49  | 35097.58  | 53449.04  | 51664.48  |
| 71200.25  | 116269.6  | 83669.48  | 96959.54  | 36245.58  | 49655.53  | 29918.67  | 31778.28  | 54225.49  | 45792.18  |
| 79893.33  | 102592.3  | 94088.37  | 113420    | 35863.02  | 44507.59  | 34140.37  | 27862.5   | 54934.82  | 43370.39  |
| 73375.44  | 107667.9  | 91267.32  | 105251.9  | 36208.01  | 49869.94  | 28623.57  | 31817.34  | 59364.28  | 45420.51  |
| 76003.3   | 113653.6  | 88569.71  | 108701.9  | 39181.96  | 42674.89  | 30151.32  | 31576.1   | 50053.17  | 44076.19  |

|            |           |            |            |            |            |           |            |            |           |
|------------|-----------|------------|------------|------------|------------|-----------|------------|------------|-----------|
| LP375.162! | LP375.200 | LP375.200! | LP375.200! | LP375.247! | LP375.347! | LP376.232 | LP376.233! | LP376.232! | LP376.233 |
| 36165.86   | 55905.2   | 43856.92   | 45458.02   | 24439.55   | 62551.45   | 94715.39  | 96153.13   | 48716.44   | 96896.56  |
| 33374.92   | 59755.2   | 52800.63   | 45444.02   | 23704.85   | 63656.51   | 91018.68  | 91964.78   | 54838.11   | 91300.98  |
| 35276.3    | 57242.59  | 54539.04   | 43500.69   | 23187.54   | 62084.02   | 101213.4  | 89004.89   | 60081.36   | 97951.64  |
| 35960.63   | 58414.74  | 54160.66   | 45829.51   | 26394.15   | 59796.62   | 94992.7   | 94844.53   | 50634.88   | 86418.4   |
| 33909.28   | 62994.09  | 44993.93   | 48943.32   | 21688.51   | 59815.08   | 99795.09  | 87069.94   | 53023.7    | 90057.81  |

|           |           |           |           |           |           |           |           |           |           |
|-----------|-----------|-----------|-----------|-----------|-----------|-----------|-----------|-----------|-----------|
| LP376.233 |
| 92481.9   | 109301.9  | 117972.4  | 66365.38  | 119060.4  | 177698.6  | 107698    | 113746.4  | 94462.96  | 87097.51  |
| 87095.29  | 102807    | 125135.3  | 66121.87  | 117704.4  | 161870.3  | 113864.5  | 116569.4  | 83157.93  | 80192.55  |
| 88769.96  | 111209.9  | 125759.7  | 71094.98  | 123708    | 166711.6  | 101997.1  | 115647.8  | 93824.8   | 75989.26  |
| 74258.17  | 103925.5  | 124890.8  | 62164.68  | 129961.7  | 177209.9  | 105320.8  | 118114.2  | 87603.29  | 80371.18  |
| 84569.01  | 99157.91  | 132585    | 64723.14  | 116972.1  | 165863.8  | 104178.1  | 120440.9  | 84838.83  | 86806.4   |

|           |           |           |           |           |           |           |           |           |           |
|-----------|-----------|-----------|-----------|-----------|-----------|-----------|-----------|-----------|-----------|
| LP376.233 | LP376.233 | LP376.233 | LP376.233 | LP376.233 | LP376.234 | LP376.233 | LP376.233 | LP376.233 | LP376.232 |
| 99503.18  | 75315.36  | 68560.84  | 62493.62  | 123687.3  | 58648.53  | 82905.84  | 71040.44  | 68176.07  | 85018.51  |
| 100853.8  | 71622.69  | 83782.45  | 64053.75  | 127976.7  | 60060.58  | 77967.19  | 71696.13  | 68377.72  | 97275.37  |
| 96453.15  | 71460.46  | 65111.55  | 65256.47  | 125164.6  | 61385.88  | 88130.4   | 69489.09  | 65446.41  | 88968.95  |
| 98752.85  | 73532.54  | 67137.03  | 72727.44  | 123618.4  | 65652.61  | 79064.94  | 74435.82  | 71784.13  | 77879.68  |
| 103969.5  | 75742.31  | 73510.06  | 68417.74  | 130342.4  | 73134.82  | 85363.25  | 81081.36  | 69761.07  | 85159.06  |

|           |           |           |           |           |           |           |           |           |           |
|-----------|-----------|-----------|-----------|-----------|-----------|-----------|-----------|-----------|-----------|
| LP376.233 | LP376.233 | LP376.233 | LP376.233 | LP376.233 | LP376.233 | LP376.269 | LP376.269 | LP376.269 | LP376.269 |
| 84045.09  | 120977.4  | 91002.07  | 68503.52  | 110749.9  | 107719.4  | 150725.3  | 238271    | 96000.11  | 109073.3  |
| 78923.31  | 130107.5  | 82774.45  | 80081.44  | 104839.1  | 105466.6  | 94098.61  | 493698.6  | 127134    | 139875.8  |
| 85517.91  | 123912.1  | 85478.96  | 67730.7   | 96304.13  | 108360.8  | 107587.1  | 270502.7  | 100707.9  | 135640.9  |
| 81427.81  | 127303.6  | 84039.75  | 66592.29  | 106103    | 99837.72  | 165586.9  | 548795.1  | 83499.4   | 114312.7  |
| 80606.15  | 116313.9  | 92372.45  | 63038.85  | 100862.6  | 103358.8  | 109843.6  | 341721.3  | 98595.95  | 134359.6  |



|           |           |           |           |           |           |           |           |           |           |
|-----------|-----------|-----------|-----------|-----------|-----------|-----------|-----------|-----------|-----------|
| LP376.269 |
| 230231.3  | 118984.3  | 283167.5  | 132656.1  | 130352.7  | 102781    | 169242.6  | 247579.4  | 127135.3  | 159439.5  |
| 98967.24  | 151200    | 253697.3  | 93553.96  | 146421.7  | 90682.34  | 101841.4  | 137657.1  | 124472.3  | 178263.8  |
| 152940.6  | 152974.5  | 216630.3  | 123543.4  | 143874.4  | 100253.2  | 127628.7  | 174378.3  | 132903.2  | 125043.2  |
| 132288    | 121627.5  | 136422.4  | 130400.7  | 151050.8  | 121957    | 162786.7  | 182138.3  | 119735.9  | 165195.6  |
| 251903.5  | 117321    | 282975.6  | 120342.6  | 143152    | 71996.57  | 124276.5  | 197633.2  | 121905.1  | 117560.9  |

|           |           |           |           |           |           |           |           |           |           |
|-----------|-----------|-----------|-----------|-----------|-----------|-----------|-----------|-----------|-----------|
| LP376.269 |
| 112512.4  | 96009.94  | 119568    | 96648.61  | 130277.4  | 115889.2  | 104040.5  | 111472.4  | 235077.2  | 106518.2  |
| 118550.8  | 117093.3  | 108036.2  | 93551.94  | 142467.1  | 114252.7  | 92122.37  | 99307.96  | 231962.8  | 111500    |
| 117962.1  | 136289.3  | 90402.57  | 99003.43  | 149037    | 112175.4  | 98171.31  | 85127.88  | 225234.1  | 111788.1  |
| 118326.5  | 89526.99  | 128405.1  | 95581.31  | 131236.9  | 123030.8  | 107859.5  | 113630.6  | 230816.4  | 112445.3  |
| 114402.2  | 89985.7   | 90067.72  | 87221.64  | 144862.9  | 103447.5  | 104668.2  | 97256.21  | 227541    | 84618.46  |

|           |           |           |           |           |           |           |           |           |           |
|-----------|-----------|-----------|-----------|-----------|-----------|-----------|-----------|-----------|-----------|
| LP376.269 | LP376.270 | LP376.269 |
| 112889.2  | 103589.7  | 210363.7  | 81927.8   | 145432    | 99341.8   | 97200.99  | 126062.9  | 138594.1  | 89793.86  |
| 123342.2  | 104339.2  | 206460.6  | 81212.41  | 118121.1  | 95607.8   | 97097.74  | 122179.6  | 132708.7  | 86316.69  |
| 124462.1  | 122420    | 100691.1  | 86535.17  | 138908.4  | 92359.87  | 88852.66  | 115147.1  | 138360.3  | 76285.35  |
| 134828.3  | 105071.7  | 209941    | 81766.8   | 153969.8  | 94613.05  | 101003.9  | 123546.4  | 127456.3  | 91053.47  |
| 118682.5  | 96044.5   | 218316.1  | 89823.55  | 138973.5  | 93172.88  | 97139.56  | 122091.5  | 136964.8  | 91448.11  |

|           |           |           |           |           |          |           |           |           |           |
|-----------|-----------|-----------|-----------|-----------|----------|-----------|-----------|-----------|-----------|
| LP376.269 | LP376.269 | LP376.270 | LP376.269 | LP376.269 | LP376.27 | LP376.269 | LP376.269 | LP376.269 | LP376.270 |
| 663961.7  | 94233.51  | 113236.3  | 106678.1  | 185772.1  | 91353.49 | 121375.1  | 110608    | 67123.24  | 108452    |
| 725326.5  | 92841.96  | 109828.3  | 113533.2  | 197328.4  | 87396.24 | 115425.8  | 107671.2  | 70382.43  | 122572.9  |
| 957025.3  | 93139.35  | 102840.2  | 91254.9   | 143801.6  | 96373.02 | 115131.2  | 105961.4  | 64714.89  | 120693.5  |
| 813933.3  | 100901.1  | 104901.7  | 119016.9  | 204377.7  | 98390.03 | 126600.2  | 107997.8  | 70463.69  | 111691.1  |
| 1162475   | 85648.85  | 118632.9  | 115613.8  | 162225.1  | 94386.84 | 132624    | 115447.6  | 68755.48  | 109983.4  |

|           |           |           |           |           |           |           |           |           |           |
|-----------|-----------|-----------|-----------|-----------|-----------|-----------|-----------|-----------|-----------|
| LP376.269 |
| 99030.81  | 100482.5  | 80824.79  | 113502    | 55098.71  | 101685.5  | 81829.47  | 76558.12  | 71973.46  | 92296.64  |
| 89988.73  | 96176.79  | 82907.33  | 117061.6  | 50736.42  | 97245.8   | 85014.03  | 77517.03  | 85046.16  | 103817.2  |
| 102349.2  | 102657.6  | 85442.02  | 117237.9  | 61027.09  | 104159    | 81575.16  | 82015.95  | 75781.6   | 99045.16  |
| 95650.19  | 103485    | 85047.63  | 111176    | 62543.35  | 108472.8  | 80973.6   | 74564.95  | 78030.93  | 101056.9  |
| 98704.74  | 95848.58  | 77046.99  | 118459.8  | 48491.29  | 102467.2  | 83711.49  | 77214.57  | 71448.46  | 101187.7  |

|           |           |           |           |           |           |           |           |           |           |
|-----------|-----------|-----------|-----------|-----------|-----------|-----------|-----------|-----------|-----------|
| LP376.270 | LP376.269 | LP376.269 | LP376.269 | LP376.27_ | LP376.269 | LP376.297 | LP376.306 | LP376.306 | LP376.306 |
| 61080.86  | 84142.27  | 112801.2  | 228071.8  | 91782.66  | 102582    | 290852.1  | 223342.9  | 223291.4  | 298166.3  |
| 59508.68  | 83771.46  | 113075.7  | 236062    | 95122.72  | 106972.1  | 298668.6  | 258922.8  | 234080.2  | 302639.2  |
| 60870.8   | 87844.9   | 114863.1  | 260472.6  | 100664.1  | 93279.32  | 273635.1  | 220452.8  | 231277.7  | 312043.3  |
| 59471.47  | 91270.28  | 114522.8  | 223155.2  | 97048.87  | 97693.53  | 260290.8  | 228963.5  | 257248.1  | 308216.6  |
| 61290.71  | 82137.75  | 112031.9  | 235472.1  | 88624.15  | 97934.3   | 259020.7  | 209218.6  | 234358.3  | 310045.3  |

|           |           |           |           |           |           |           |           |           |           |
|-----------|-----------|-----------|-----------|-----------|-----------|-----------|-----------|-----------|-----------|
| LP376.306 | LP376.306 | LP376.318 | LP376.319 | LP376.342 | LP376.342 | LP376.342 | LP376.342 | LP376.342 | LP376.342 |
| 167851.4  | 133650.9  | 115085.3  | 82235.33  | 342366.5  | 120395.6  | 241874.3  | 376214.1  | 236413.7  | 206868.5  |
| 181311    | 137302.2  | 115025.7  | 74541.61  | 303828.3  | 131085.3  | 232205.7  | 377890    | 273066.7  | 196787    |
| 177360.9  | 136985.2  | 110142.6  | 80691.07  | 301341.2  | 142817.8  | 221966    | 290871.3  | 205550.5  | 373211.8  |
| 166595.5  | 130284    | 122364.7  | 80706.06  | 300235.4  | 118189.3  | 233305.9  | 369617.6  | 225294.1  | 205091.8  |
| 189232.4  | 129445.7  | 114701.4  | 74136.04  | 345528.3  | 113744.7  | 215412.7  | 355109    | 251081.2  | 200977.9  |

|           |           |           |           |           |           |           |           |           |           |
|-----------|-----------|-----------|-----------|-----------|-----------|-----------|-----------|-----------|-----------|
| LP376.342 | LP376.342 | LP376.342 | LP376.342 | LP376.342 | LP376.341 | LP376.342 | LP376.342 | LP376.342 | LP376.342 |
| 322010    | 122238.8  | 118921.3  | 222971.1  | 117519.4  | 88088.27  | 131285.2  | 1002884   | 407778.3  | 287683.3  |
| 208342.1  | 115956.7  | 83347.3   | 219495.8  | 122677.5  | 87439.67  | 122364.1  | 825519.1  | 502048.6  | 316995.1  |
| 242288.6  | 124216.2  | 85935.35  | 228900.9  | 124325.4  | 82604.92  | 126318.5  | 1325388   | 454661.3  | 259475.7  |
| 219575    | 119793.4  | 100255.2  | 236357.7  | 122977.9  | 85431.84  | 127713.2  | 1428133   | 452346.1  | 282448.1  |
| 198517    | 113738.3  | 86962.82  | 227576.4  | 114793.8  | 86890.74  | 121779.2  | 1560398   | 605051.1  | 180779    |



|           |           |           |           |           |           |           |           |           |           |
|-----------|-----------|-----------|-----------|-----------|-----------|-----------|-----------|-----------|-----------|
| LP376.342 | LP376.342 | LP376.343 | LP376.342 | LP376.343 | LP376.342 | LP376.342 | LP376.355 | LP376.456 | LP377.158 |
| 201890.9  | 177840.7  | 159078    | 291141.5  | 173652.4  | 311761.1  | 147999.2  | 17843.32  | 24150.77  | 22906.21  |
| 216864.6  | 191910.6  | 172709.2  | 275050    | 171089.3  | 281838.7  | 153488.9  | 20305.39  | 20795.96  | 24701.25  |
| 184917.4  | 200317.6  | 172163.2  | 292858.1  | 177315.3  | 320683.7  | 144850.3  | 32187.61  | 16802.97  | 17041.96  |
| 264284.2  | 194239.5  | 167552.3  | 297125.4  | 175800.1  | 314481    | 153459.1  | 40459.1   | 15762.46  | 23551.63  |
| 260881.3  | 156856.4  | 164178.6  | 283920.7  | 174520.1  | 318508.2  | 135657.3  | 43894.82  | 17875.74  | 24500.76  |

|           |           |           |           |           |           |           |           |           |           |
|-----------|-----------|-----------|-----------|-----------|-----------|-----------|-----------|-----------|-----------|
| LP377.178 | LP377.178 | LP377.178 | LP377.178 | LP377.178 | LP377.248 | LP377.268 | LP377.301 | LP377.305 | LP377.322 |
| 45943.85  | 32347.13  | 48694.61  | 78576.95  | 52246.63  | 26162.06  | 105191.1  | 59267.11  | 29274.93  | 20065.96  |
| 38840.87  | 43330.49  | 52873.51  | 76426.78  | 62044.63  | 16476.24  | 99408.98  | 58084.83  | 30318.74  | 21159.52  |
| 46758.97  | 42253.02  | 49129.41  | 70604.61  | 56710.33  | 21407.28  | 109295.5  | 55287.16  | 26610.63  | 20132.34  |
| 46571.2   | 42374.74  | 53117.46  | 74128.18  | 55524.91  | 23335.53  | 109003.8  | 52386.86  | 29885.3   | 19321.54  |
| 43444.4   | 44851.06  | 51903.86  | 77082.39  | 60329.94  | 20462.52  | 98317.34  | 52452.62  | 28212.26  | 18164.52  |

|           |           |           |           |           |           |           |           |           |           |           |
|-----------|-----------|-----------|-----------|-----------|-----------|-----------|-----------|-----------|-----------|-----------|
| LP377.326 | LP377.345 | LP378.212 |
| 23942.54  | 125179.5  | 170137    | 166963.7  | 88206.85  | 282504.7  | 176509.4  | 190541.8  | 129365.5  | 229241.1  |           |
| 25759.22  | 111930.1  | 175056.8  | 175780.8  | 144747    | 266112    | 86580.71  | 193919.3  | 129190.7  | 211616.2  |           |
| 28724.2   | 83245.27  | 161148.3  | 183221.9  | 129158.7  | 270416.8  | 182297.4  | 208321.8  | 132590.4  | 211952.8  |           |
| 26705.18  | 110248.3  | 100252.1  | 179630    | 118690.6  | 92714.92  | 90702.68  | 93057.21  | 76892.68  | 228249.3  |           |
| 26922.29  | 107351.9  | 157167.5  | 91416.39  | 128092    | 246979.7  | 187990.8  | 199481.7  | 145888.6  | 227452.7  |           |

|           |           |           |           |           |           |           |           |           |           |
|-----------|-----------|-----------|-----------|-----------|-----------|-----------|-----------|-----------|-----------|
| LP378.212 | LP378.213 | LP378.212 | LP378.213 |
| 248098.4  | 230476.9  | 230527.9  | 197231.9  | 88949.41  | 113884.4  | 72654.49  | 230508.5  | 151613.1  | 197199.8  |
| 241431.6  | 95861.93  | 224207.9  | 215597.1  | 93090.27  | 120266.2  | 104376.2  | 236683.6  | 83849.58  | 194107.7  |
| 234920.4  | 237288.5  | 223377.9  | 205321    | 96067.47  | 119873.4  | 218936.5  | 256650.7  | 156494.9  | 200051.7  |
| 153691.1  | 241351.3  | 233025.4  | 210451.3  | 68304.46  | 85180.42  | 100917.4  | 131948.1  | 82244.71  | 107008.9  |
| 263977.7  | 230006.4  | 236665.3  | 213952.2  | 90950.83  | 119955.7  | 199397.5  | 286004.6  | 170664.9  | 205494.5  |

|           |           |           |           |           |           |           |           |           |           |
|-----------|-----------|-----------|-----------|-----------|-----------|-----------|-----------|-----------|-----------|
| LP378.213 | LP378.213 | LP378.212 | LP378.213 | LP378.213 | LP378.213 | LP378.212 | LP378.213 | LP378.213 | LP378.213 |
| 154275.4  | 162217.4  | 211862.1  | 288421.9  | 274053.6  | 270094.5  | 256291.9  | 187876.5  | 257620.8  | 443732    |
| 164611.5  | 174167.1  | 87103.52  | 284510.7  | 270910.9  | 261964.6  | 248433.8  | 183094    | 246062.3  | 462724.9  |
| 151893.8  | 176099.6  | 204303.2  | 280677.8  | 271891.5  | 280445.1  | 270384.2  | 194243.7  | 259111.4  | 455283.4  |
| 66685.67  | 80493.34  | 221127.6  | 282989.4  | 264041.7  | 131788    | 128671.4  | 100208.5  | 123996.8  | 223743.6  |
| 158720.9  | 170828.6  | 200279.4  | 307510.8  | 276379    | 285095.7  | 255645.1  | 203218    | 267599.9  | 495794    |

|           |           |           |           |           |           |           |           |           |           |
|-----------|-----------|-----------|-----------|-----------|-----------|-----------|-----------|-----------|-----------|
| LP378.213 | LP378.213 | LP378.213 | LP378.212 | LP378.213 | LP378.222 | LP378.248 | LP378.249 | LP378.248 | LP378.248 |
| 388175.2  | 120341.6  | 220132.4  | 147328.2  | 153961.9  | 119550.6  | 189936    | 175167.9  | 183831.7  | 178940.1  |
| 400523.2  | 123646.8  | 204698.9  | 158658.2  | 159073.9  | 126282.7  | 209915.2  | 176737.3  | 173913.6  | 171124.1  |
| 392784.9  | 115134    | 206160.5  | 153747.5  | 153369.7  | 132980    | 240588.4  | 204256.1  | 187894.1  | 180551.7  |
| 176994    | 126290.2  | 209942.5  | 91768.05  | 79196.63  | 133245.5  | 187124.9  | 167245.8  | 171062.4  | 172384.7  |
| 429872.5  | 133371.5  | 202050.2  | 139696.2  | 175115.9  | 146161    | 191736.1  | 167482.7  | 148183.6  | 182591.5  |

|           |           |           |           |           |           |           |           |           |           |
|-----------|-----------|-----------|-----------|-----------|-----------|-----------|-----------|-----------|-----------|
| LP378.249 | LP378.249 | LP378.249 | LP378.248 | LP378.249 | LP378.249 | LP378.248 | LP378.249 | LP378.249 | LP378.249 |
| 308664.2  | 267026.9  | 175109.2  | 183980.8  | 144470.2  | 247680.4  | 182028.1  | 141201.4  | 293764.7  | 193938.6  |
| 299375.6  | 283127.1  | 170486.7  | 185957.9  | 147832.2  | 247266.1  | 185385.9  | 143129.6  | 294182.8  | 220368.2  |
| 300781.5  | 256865.3  | 193570.2  | 192041.1  | 169426    | 174143.7  | 197820.2  | 144734.7  | 324444.3  | 220498.7  |
| 258863.1  | 268079.1  | 187173.5  | 192356.3  | 153820.7  | 254403.9  | 202733.7  | 154272.9  | 308916.9  | 196782.3  |
| 267848.5  | 258463    | 174365.6  | 183685.8  | 140659.9  | 260808    | 188468.8  | 142663.6  | 342157.5  | 233839.4  |

|           |           |           |           |           |           |           |           |           |           |
|-----------|-----------|-----------|-----------|-----------|-----------|-----------|-----------|-----------|-----------|
| LP378.249 | LP378.249 | LP378.249 | LP378.249 | LP378.248 | LP378.249 | LP378.249 | LP378.248 | LP378.249 | LP378.249 |
| 212741.7  | 312381    | 188122.2  | 369216.6  | 185708.8  | 119693.8  | 311459.2  | 186081.9  | 158934.1  | 183009.7  |
| 205675.1  | 319567.8  | 190957.5  | 368655.3  | 161733.4  | 121973.1  | 302903.4  | 191778.7  | 174163.5  | 191593.7  |
| 207861.5  | 305695.5  | 191364.6  | 334668.5  | 179760.8  | 132351.6  | 311853.8  | 197049.2  | 139535.8  | 199857.2  |
| 229798    | 323738.5  | 184963.3  | 349587.6  | 180486.9  | 121138.6  | 307575.1  | 207760    | 169965.2  | 199026.1  |
| 223759.4  | 317907.9  | 197207.6  | 370480.8  | 175644.9  | 127696.9  | 324494.6  | 193907.4  | 180846.6  | 205137.2  |



|           |           |           |           |           |           |           |           |           |           |
|-----------|-----------|-----------|-----------|-----------|-----------|-----------|-----------|-----------|-----------|
| LP378.249 | LP378.249 | LP378.248 | LP378.249 | LP378.249 | LP378.249 | LP378.249 | LP378.249 | LP378.248 | LP378.249 |
| 272128.4  | 179046.6  | 164125    | 188946.3  | 190964.6  | 173770    | 275121.6  | 206084.7  | 186600.9  | 193772.8  |
| 257270.5  | 185497.7  | 146714.6  | 185169.5  | 191032.6  | 160961.4  | 275388.1  | 207556.7  | 194204.3  | 191005    |
| 252970    | 177454.3  | 162423.8  | 189451.5  | 183286.1  | 170934.4  | 285944.5  | 207304.1  | 299795.8  | 190816.3  |
| 252148.2  | 188846.6  | 157788.1  | 201906.8  | 193864.6  | 163048.1  | 297699.6  | 209200.3  | 192297.9  | 197632.2  |
| 270281.5  | 183123.7  | 154442.6  | 189971.1  | 199292.2  | 163043.8  | 279253.6  | 214542.4  | 186378.5  | 214811.1  |

|           |           |           |           |           |           |           |           |           |           |
|-----------|-----------|-----------|-----------|-----------|-----------|-----------|-----------|-----------|-----------|
| LP378.249 | LP378.248 | LP378.249 |
| 209957.8  | 122245.8  | 145835.1  | 224107.2  | 226798.8  | 266857.8  | 195699.1  | 149360.5  | 152080.4  | 197387    |
| 199617    | 127446.7  | 139928.4  | 233856.2  | 225398.9  | 265391.2  | 186818.4  | 162002.5  | 145159.5  | 205104.6  |
| 192513    | 130548.5  | 140501.9  | 232373.9  | 221201.2  | 283713.7  | 193258    | 152112.2  | 147169.2  | 240137.6  |
| 207394.4  | 123350.3  | 135235.8  | 242255.2  | 227396    | 280324.4  | 192592.8  | 165775.1  | 151981.5  | 194960.4  |
| 207200.3  | 128044.1  | 155445.6  | 239470.6  | 238107.9  | 275399    | 200986    | 158615.8  | 138372.6  | 194311    |

|           |           |           |           |           |           |           |           |           |           |
|-----------|-----------|-----------|-----------|-----------|-----------|-----------|-----------|-----------|-----------|
| LP378.249 | LP378.248 | LP378.249 | LP378.248 | LP378.249 | LP378.249 | LP378.249 | LP378.249 | LP378.249 | LP378.249 |
| 250067.7  | 124113.1  | 145590.9  | 168688.5  | 148511.1  | 233124.4  | 190053.6  | 163886.1  | 164490.5  | 196295.1  |
| 235994.7  | 130273.3  | 148730.6  | 167155.3  | 151331    | 223829.2  | 185480.4  | 160939.8  | 168548.2  | 188074.4  |
| 235416    | 121029.1  | 145180.1  | 164220.9  | 159736    | 230814.4  | 189220.9  | 178406.3  | 153128.2  | 197503.2  |
| 250606.6  | 121551.4  | 144240    | 168691.4  | 142349.5  | 226595.8  | 209387.8  | 176092.9  | 160239.3  | 198036.9  |
| 234226    | 131174.3  | 156923.1  | 171924.1  | 141339.1  | 240971.8  | 177868.9  | 165125.8  | 158279.4  | 192781.2  |

|           |           |           |           |           |           |           |           |           |           |
|-----------|-----------|-----------|-----------|-----------|-----------|-----------|-----------|-----------|-----------|
| LP378.249 |
| 204984.1  | 137087.6  | 129941.4  | 141800.9  | 171400.6  | 86135.31  | 175007.6  | 180089.4  | 176034.2  | 115061.7  |
| 200295.8  | 131033.6  | 128953.6  | 141295.4  | 176989.3  | 91469.96  | 165932.5  | 164914.6  | 179149.1  | 106168.4  |
| 207342.5  | 136179.6  | 147325.9  | 141710.7  | 169012.9  | 86234.67  | 161698.2  | 164980.3  | 172338.4  | 111737.4  |
| 219934.5  | 142649.8  | 134168.8  | 146935.8  | 186006.4  | 88784.3   | 175577.7  | 172478.8  | 188009.6  | 112866.4  |
| 199321.7  | 130281.3  | 133092.8  | 145787.9  | 170141.1  | 95250.76  | 158160    | 177313    | 183384.9  | 89696.81  |

|           |           |           |           |           |           |           |           |           |           |
|-----------|-----------|-----------|-----------|-----------|-----------|-----------|-----------|-----------|-----------|
| LP378.248 | LP378.249 | LP378.249 | LP378.249 | LP378.249 | LP378.249 | LP378.284 | LP378.285 | LP378.285 | LP378.284 |
| 68622.1   | 261821.2  | 194659.4  | 174279.9  | 87295.11  | 102428    | 82084.08  | 71498.16  | 50289.63  | 47136.89  |
| 79197.03  | 264518.5  | 174324.1  | 167842.8  | 81374.99  | 105884.7  | 79004.82  | 68337.56  | 57238.29  | 46135.92  |
| 71738.87  | 272774.8  | 177998.8  | 172425.4  | 89061.3   | 109906.4  | 82892.4   | 63959.41  | 56404.4   | 47666     |
| 69852.68  | 270625.4  | 201977.6  | 151288.7  | 84018.21  | 109453.2  | 82546.56  | 55214.14  | 54663.1   | 46768.97  |
| 74965.37  | 283834    | 199633.1  | 155641.7  | 82864.51  | 109400    | 92813.05  | 68811.33  | 57296.18  | 44765.8   |

|           |           |           |           |           |           |           |           |           |           |
|-----------|-----------|-----------|-----------|-----------|-----------|-----------|-----------|-----------|-----------|
| LP378.285 |
| 64703.84  | 89197.12  | 78638.38  | 57347.56  | 57775.25  | 57720.43  | 93349.18  | 102929.1  | 75920.19  | 61082.92  |
| 56662.34  | 85329.64  | 79059.91  | 65106.25  | 61109.48  | 55550.58  | 93682.3   | 85893.91  | 78114.82  | 71244.64  |
| 61095.92  | 87393.49  | 76339.69  | 56689.61  | 58274.12  | 63256.86  | 91939.61  | 84563.35  | 78533.51  | 75740.73  |
| 88095.61  | 92534.62  | 76389.08  | 61740.47  | 60770.24  | 43495.95  | 96151.93  | 98120.17  | 79389.42  | 75178.82  |
| 54825.86  | 89332.91  | 77599.65  | 65425.77  | 60015.01  | 58239.42  | 97773.25  | 96244.35  | 75888.78  | 66550.79  |

|           |           |           |           |           |           |           |           |           |           |
|-----------|-----------|-----------|-----------|-----------|-----------|-----------|-----------|-----------|-----------|
| LP378.285 | LP378.285 | LP378.284 | LP378.284 | LP378.285 | LP378.285 | LP378.285 | LP378.286 | LP378.285 | LP378.285 |
| 57414.53  | 69011.15  | 44433.28  | 52849.94  | 84286.45  | 77102.55  | 46622.33  | 60086.77  | 81242.56  | 53189.8   |
| 54363.79  | 64565.4   | 40162.72  | 45832.95  | 88642.11  | 86190.34  | 48365.82  | 58173.54  | 87166.9   | 52608.13  |
| 60417.91  | 64381.09  | 39724.5   | 62052.3   | 86306.35  | 85072.49  | 48517.35  | 58498.87  | 87627.28  | 56685.93  |
| 57874.06  | 79217.9   | 44146.33  | 59721.1   | 84592.78  | 88297.51  | 48226.59  | 64918.19  | 90909.91  | 53932.19  |
| 59659.88  | 61689.18  | 51654.57  | 45692.41  | 80506.03  | 83692.47  | 42400.26  | 66498.11  | 93392.19  | 58830.4   |

|           |           |           |           |           |           |           |           |           |           |
|-----------|-----------|-----------|-----------|-----------|-----------|-----------|-----------|-----------|-----------|
| LP378.285 |
| 52771.31  | 52662.46  | 47103.03  | 59779.52  | 39793.09  | 54251.46  | 57585.25  | 50480.67  | 71258.62  | 62222.11  |
| 49893.24  | 57427.75  | 50117.17  | 58528.02  | 41409.28  | 57293.19  | 57714.07  | 53942.35  | 71507.34  | 59965.66  |
| 57287.12  | 54795.58  | 53859.49  | 62671.82  | 36442.69  | 55871.07  | 55560.03  | 54575.84  | 70807.2   | 63899.19  |
| 53271.12  | 59829.92  | 47210.8   | 64118.42  | 43764.06  | 55045.19  | 64141.38  | 52571.58  | 73544.09  | 50103.84  |
| 55072.97  | 61734.28  | 49884.13  | 55585.21  | 32177.51  | 53945.89  | 48799.43  | 44939.04  | 67357.45  | 64936.14  |



|           |           |           |           |           |           |           |           |           |           |
|-----------|-----------|-----------|-----------|-----------|-----------|-----------|-----------|-----------|-----------|
| LP378.285 | LP378.285 | LP378.285 | LP378.285 | LP378.285 | LP378.300 | LP379.084 | LP379.084 | LP379.084 | LP379.084 |
| 62354.59  | 51603.41  | 54564.67  | 64519.04  | 52627.67  | 26368.31  | 44038.89  | 33649.44  | 28071.91  | 27161.36  |
| 63229.91  | 52652.66  | 53553.37  | 66767.38  | 55659.44  | 23537.28  | 39783.13  | 30864.82  | 28214.31  | 24680.69  |
| 61951.13  | 49769.46  | 55349.57  | 61820.62  | 53295.3   | 24844.78  | 51083.46  | 44411.89  | 35336.39  | 37414.27  |
| 59869.2   | 59989.51  | 55428.81  | 67514.01  | 51691.59  | 22541.95  | 52588.59  | 35899.17  | 32421.16  | 37911.55  |
| 64179.41  | 45009.73  | 52138.32  | 71796.15  | 50845.38  | 21701.67  | 41520.5   | 31911.59  | 24096.34  | 22256.65  |

|           |           |           |           |           |           |           |           |           |           |
|-----------|-----------|-----------|-----------|-----------|-----------|-----------|-----------|-----------|-----------|
| LP379.084 |
| 23719.13  | 26558.19  | 33319.92  | 23987.47  | 25110.43  | 32935.5   | 24939.71  | 23007.81  | 34782.03  | 25518.12  |
| 24927.98  | 25599.91  | 32641.47  | 26554.06  | 25369.3   | 32065.45  | 25556.16  | 20821.56  | 33813.24  | 21398.29  |
| 33530.94  | 30377.28  | 38933.83  | 28272.1   | 31639.09  | 39498.82  | 28091.62  | 29595.14  | 44553.94  | 29467.12  |
| 32683.67  | 38211.54  | 37501.11  | 32320.57  | 30824.97  | 46315.17  | 35848.37  | 32817.67  | 39199.07  | 35445.91  |
| 25533.23  | 27503.78  | 24695.89  | 27383.96  | 18246.55  | 31842.2   | 21664.72  | 20707.1   | 32719.95  | 20473.88  |

|           |           |           |           |           |           |           |           |           |           |
|-----------|-----------|-----------|-----------|-----------|-----------|-----------|-----------|-----------|-----------|
| LP379.084 | LP379.084 | LP379.084 | LP379.084 | LP379.154 | LP379.237 | LP379.248 | LP379.251 | LP379.251 | LP379.251 |
| 28720.67  | 39288.75  | 37312.22  | 17647.28  | 177907.3  | 27366.57  | 34725.19  | 49722.47  | 57334.63  | 54360.06  |
| 28814.41  | 30552.88  | 31040.72  | 18441.18  | 165089.9  | 28156.07  | 36504.17  | 49305.77  | 55495.77  | 48792.34  |
| 31511.29  | 42865.88  | 46499.35  | 21243.01  | 201184.6  | 30762.72  | 45802     | 49901.04  | 60727.15  | 57310.64  |
| 37760.56  | 41391.83  | 45876.26  | 26096.84  | 199632.7  | 30941.69  | 47131.67  | 51266.44  | 59577.65  | 58211.92  |
| 30946.69  | 29627.43  | 32672.93  | 17559.6   | 144015.8  | 26170.67  | 50904.85  | 53133.34  | 62861.69  | 63075.8   |

|           |           |           |           |           |           |           |           |           |           |
|-----------|-----------|-----------|-----------|-----------|-----------|-----------|-----------|-----------|-----------|
| LP379.251 | LP379.251 | LP379.251 | LP379.251 | LP379.251 | LP379.251 | LP379.250 | LP379.251 | LP379.251 | LP379.251 |
| 35415.27  | 47717.62  | 37284.43  | 26534.2   | 34378.46  | 26105.89  | 30240.21  | 42835.68  | 32552.98  | 34185.67  |
| 27766.62  | 41080.59  | 34954.27  | 25179.68  | 27227.07  | 26430.5   | 28261.71  | 40808.16  | 32436.65  | 33517.9   |
| 32950.38  | 54043.37  | 35784.41  | 27913.89  | 31883.79  | 27144.86  | 34988.74  | 48131.63  | 33455.22  | 36877.21  |
| 30316.25  | 49387.27  | 44576.18  | 26208.32  | 32087.48  | 30089.38  | 32693.6   | 44215.2   | 25864.33  | 36526.32  |
| 32410.52  | 48463.61  | 38086.96  | 26014.14  | 31637.99  | 27876.02  | 32856.05  | 46399.61  | 32616.25  | 32359.42  |

|           |           |           |           |           |           |           |           |           |           |
|-----------|-----------|-----------|-----------|-----------|-----------|-----------|-----------|-----------|-----------|
| LP379.251 | LP379.252 | LP379.251 | LP379.251 | LP379.251 | LP379.248 | LP379.250 | LP379.250 | LP379.251 | LP379.251 |
| 39924.08  | 52242.56  | 64517.43  | 49698.86  | 43467.52  | 19069.71  | 47809.1   | 26828.65  | 43598.5   | 34207.74  |
| 32310.07  | 45737.52  | 60671.96  | 51412.14  | 45658.82  | 20614.9   | 40619.45  | 32657.04  | 39509.51  | 38025.02  |
| 42267.08  | 49909.38  | 59858.56  | 51789.3   | 44060.71  | 19392.33  | 42939.32  | 28346.63  | 37312.39  | 38457.08  |
| 44491.93  | 48044.67  | 58428.68  | 48338.97  | 49593.24  | 21651.59  | 44207.68  | 33106.63  | 41201.8   | 37920.4   |
| 43470.91  | 47423.05  | 65223.22  | 54677.52  | 47447.24  | 20279.28  | 45089.11  | 33738.76  | 42753.55  | 42115.22  |

|           |           |           |           |           |           |           |           |           |           |
|-----------|-----------|-----------|-----------|-----------|-----------|-----------|-----------|-----------|-----------|
| LP379.251 | LP379.319 | LP379.320 | LP379.320 | LP379.320 | LP380.157 | LP380.226 | LP380.279 | LP380.28_ | LP380.279 |
| 53490.8   | 63043.21  | 40207.62  | 41680.39  | 56339.65  | 36174.78  | 318608.5  | 3034842   | 3714208   | 480921.6  |
| 48582.21  | 54595.44  | 47240.86  | 40115.43  | 54901.28  | 38495.69  | 292697.4  | 2492971   | 3805416   | 619983.8  |
| 52209.59  | 52239.07  | 42814.73  | 40268.96  | 56001.62  | 52498.37  | 328175.2  | 2524110   | 3545047   | 481666.7  |
| 57743.1   | 54082.17  | 39978.59  | 41205.83  | 49557.2   | 61642.76  | 311266.6  | 5463506   | 3594624   | 547342.6  |
| 53890.85  | 60504.92  | 47589.28  | 41350.66  | 58600.7   | 52544.19  | 282074.5  | 1893660   | 3498830   | 443099.7  |

|           |           |           |           |           |           |          |           |           |          |
|-----------|-----------|-----------|-----------|-----------|-----------|----------|-----------|-----------|----------|
| LP380.279 | LP380.279 | LP380.279 | LP380.279 | LP380.279 | LP380.279 | LP380.28 | LP380.279 | LP380.279 | LP380.28 |
| 5344969   | 2254298   | 1225825   | 1352398   | 1642526   | 1612202   | 3607446  | 2743970   | 2333152   | 3367698  |
| 4639291   | 2027752   | 1641298   | 987500.4  | 2873245   | 2583401   | 2181738  | 4108194   | 2372118   | 3530996  |
| 3106518   | 2303503   | 1810695   | 1545966   | 1634226   | 1473624   | 3414891  | 2212103   | 2601916   | 2939015  |
| 3884937   | 2473284   | 1543168   | 1264945   | 1483859   | 1528112   | 2875285  | 2647342   | 2813538   | 4198290  |
| 3516553   | 2055318   | 2684461   | 1472692   | 2545927   | 2534873   | 3200715  | 2500765   | 2099564   | 4768924  |

|           |           |           |           |           |           |           |           |           |           |
|-----------|-----------|-----------|-----------|-----------|-----------|-----------|-----------|-----------|-----------|
| LP380.28_ | LP380.279 | LP380.279 | LP380.279 | LP380.28_ | LP380.279 | LP380.280 | LP380.279 | LP380.279 | LP380.279 |
| 1862738   | 3183386   | 4005739   | 3250507   | 3535184   | 2656600   | 2791870   | 1854766   | 2309388   | 2841035   |
| 2939545   | 2301299   | 2883526   | 3230377   | 3894120   | 2380230   | 3457497   | 1762476   | 2379256   | 4089022   |
| 2352764   | 3788809   | 2954070   | 2589698   | 4376453   | 2276003   | 4127043   | 1633689   | 3536894   | 8886022   |
| 2343987   | 4459845   | 3777145   | 2720791   | 2783663   | 1826508   | 3459595   | 1756845   | 4169372   | 2936166   |
| 2247074   | 2754426   | 3187748   | 3599478   | 3444915   | 1390972   | 3146919   | 1991105   | 3127907   | 3784468   |



|           |           |           |           |           |           |           |           |           |           |
|-----------|-----------|-----------|-----------|-----------|-----------|-----------|-----------|-----------|-----------|
| LP380.280 | LP380.279 | LP380.280 | LP380.280 | LP380.279 | LP380.279 | LP380.28_ | LP380.28_ | LP380.279 | LP380.279 |
| 3939969   | 1246148   | 3464511   | 2738204   | 1679805   | 2301520   | 2945825   | 3179336   | 4405091   | 1652978   |
| 3546267   | 1178296   | 2852929   | 3516608   | 1648191   | 4038783   | 2669978   | 3401324   | 5068576   | 2108753   |
| 5658202   | 1461054   | 3412457   | 3371429   | 2069882   | 3585935   | 4240883   | 3335941   | 3484955   | 1705661   |
| 4359926   | 1478402   | 3357708   | 3233672   | 1425795   | 3216426   | 4806386   | 3842304   | 4414931   | 1623629   |
| 3008902   | 1526508   | 3546214   | 3377054   | 1216324   | 3191301   | 3704887   | 5196413   | 3872681   | 1405778   |

|           |           |           |           |           |           |           |           |           |           |
|-----------|-----------|-----------|-----------|-----------|-----------|-----------|-----------|-----------|-----------|
| LP380.279 | LP380.28_ | LP380.279 | LP380.279 | LP380.28_ | LP380.279 | LP380.280 | LP380.279 | LP380.279 | LP380.280 |
| 3653722   | 2972956   | 2107066   | 1294008   | 3038107   | 1407673   | 3410710   | 404734.6  | 203357.9  | 3634495   |
| 3658695   | 4234807   | 3862099   | 1931447   | 3503541   | 1520827   | 3544094   | 350164.4  | 217542.3  | 2461771   |
| 3923901   | 3755494   | 5217568   | 1229325   | 5324947   | 2499866   | 2547507   | 270119.7  | 262630.4  | 2882991   |
| 4599215   | 3632923   | 2917322   | 1363210   | 3251055   | 1628120   | 2731163   | 340848.1  | 201125.3  | 3465265   |
| 3632959   | 3910169   | 2659104   | 1372817   | 3167907   | 1516002   | 5375622   | 297598.1  | 259344    | 3460250   |

|           |           |           |           |           |           |           |           |           |           |
|-----------|-----------|-----------|-----------|-----------|-----------|-----------|-----------|-----------|-----------|
| LP380.279 | LP380.279 | LP380.279 | LP380.280 | LP380.28_ | LP380.279 | LP380.280 | LP380.28_ | LP380.279 | LP380.279 |
| 876537.1  | 1506178   | 3216266   | 2431591   | 2677166   | 2329093   | 3873641   | 1863589   | 3005146   | 2512232   |
| 941306.6  | 1298430   | 2149519   | 3601842   | 2346065   | 2455311   | 3240288   | 1982329   | 3567317   | 1736907   |
| 1089002   | 2171876   | 2159866   | 3391693   | 2552164   | 2588897   | 3020878   | 2853055   | 2577911   | 2053512   |
| 1126470   | 1378820   | 2159061   | 2280989   | 2644320   | 3117560   | 3558125   | 1533711   | 2899568   | 2102339   |
| 926792.6  | 1441898   | 3917904   | 3370309   | 2561333   | 2481951   | 3522633   | 1779567   | 2952017   | 1973929   |

|           |           |           |           |           |           |           |           |           |           |
|-----------|-----------|-----------|-----------|-----------|-----------|-----------|-----------|-----------|-----------|
| LP380.279 | LP380.279 | LP380.28_ | LP380.279 | LP380.28_ | LP380.28_ | LP380.279 | LP380.28_ | LP380.279 | LP380.279 |
| 3467459   | 482174.9  | 3627650   | 292699    | 2174980   | 1402392   | 619388.9  | 2106079   | 1214798   | 460972.9  |
| 2332287   | 743248.4  | 2604928   | 228358.4  | 2402238   | 2698583   | 882908.7  | 2547852   | 1811667   | 480791.4  |
| 2148230   | 466573.4  | 2208474   | 299890.1  | 2638972   | 2370742   | 657641.1  | 2624326   | 2164867   | 425383.8  |
| 2993319   | 521792.7  | 2738910   | 448384.3  | 2147540   | 1446051   | 1109494   | 2010629   | 1194963   | 721363.9  |
| 2179177   | 697655.8  | 2392316   | 250773.6  | 2381169   | 1721371   | 759278    | 1804239   | 1553547   | 572903.8  |

|           |           |           |           |           |           |           |           |           |           |
|-----------|-----------|-----------|-----------|-----------|-----------|-----------|-----------|-----------|-----------|
| LP380.28_ | LP380.279 | LP380.28_ | LP380.279 | LP380.279 | LP380.280 | LP380.279 | LP380.28_ | LP380.279 | LP380.279 |
| 2413540   | 357377.9  | 2650904   | 536695.5  | 517872.1  | 2826557   | 451649.4  | 1191579   | 430359.9  | 1531895   |
| 2114216   | 466912.3  | 2986485   | 462569.8  | 609196    | 4724476   | 272493.7  | 1197321   | 427783.1  | 1242893   |
| 2441331   | 624918.7  | 2410558   | 339996.9  | 401614.8  | 3177443   | 340029.4  | 2119020   | 445443    | 2320744   |
| 2927412   | 513049.4  | 2633497   | 378815.3  | 690220.8  | 2738221   | 251847.5  | 1954827   | 720352.1  | 1848082   |
| 2315035   | 532607.2  | 2260304   | 350808.6  | 428916.1  | 4144599   | 416392.3  | 2164381   | 390642    | 1709440   |

|           |           |           |           |           |           |           |           |           |           |
|-----------|-----------|-----------|-----------|-----------|-----------|-----------|-----------|-----------|-----------|
| LP380.279 | LP380.279 | LP380.279 | LP380.280 | LP380.280 | LP380.280 | LP380.280 | LP380.279 | LP380.28_ | LP380.279 |
| 351321.7  | 1957519   | 2543048   | 1706687   | 2457496   | 1375843   | 2440790   | 1129677   | 2557130   | 1533682   |
| 419363.5  | 2002126   | 1695949   | 1942123   | 3478465   | 1869480   | 2532028   | 729712.3  | 2002581   | 1459344   |
| 427194    | 2057345   | 2046154   | 2411171   | 3863621   | 1470691   | 2910751   | 1165657   | 2060169   | 1658299   |
| 485379.8  | 2078964   | 1615961   | 2031836   | 2775203   | 1646021   | 2649260   | 958224.7  | 2021120   | 1476657   |
| 390067.5  | 1794840   | 2011117   | 1379971   | 2773274   | 1547512   | 3173314   | 961367.4  | 2106671   | 1837686   |

|           |           |           |           |           |           |           |           |           |           |
|-----------|-----------|-----------|-----------|-----------|-----------|-----------|-----------|-----------|-----------|
| LP380.337 | LP380.337 | LP380.337 | LP380.352 | LP381.188 | LP381.188 | LP381.188 | LP381.189 | LP381.188 | LP381.189 |
| 714123    | 83740.01  | 218642.3  | 8563.08   | 88625.09  | 59002.04  | 57097.07  | 48636.98  | 62121.05  | 54524.66  |
| 711286.7  | 79881.94  | 30534.41  | 11481.99  | 45766.41  | 52994.26  | 73173.34  | 58187.54  | 68527.81  | 69351.11  |
| 727453.9  | 75892.25  | 39112.38  | 14083.74  | 65860.06  | 57475.02  | 54152.87  | 55469.52  | 65452.97  | 47311.42  |
| 686114.4  | 66008.57  | 50361.07  | 16237.23  | 62368.52  | 58760.44  | 45164.73  | 53610.42  | 60120.21  | 50781.49  |
| 704493.8  | 69342.68  | 49201.48  | 19486.16  | 57219.46  | 61817.66  | 49268.54  | 59808.98  | 53167.52  | 45122.75  |

|           |           |           |           |           |           |           |           |           |           |
|-----------|-----------|-----------|-----------|-----------|-----------|-----------|-----------|-----------|-----------|
| LP381.189 | LP381.188 | LP381.189 | LP381.188 | LP381.189 | LP381.188 | LP381.188 | LP381.188 | LP381.188 | LP381.188 |
| 52222.88  | 48846.64  | 67241.1   | 49386.34  | 46760.79  | 44927.58  | 63040.41  | 88095.78  | 60351.08  | 68549.26  |
| 59366.07  | 54473.54  | 59702.01  | 49554.63  | 57126.77  | 76592.49  | 45891.25  | 57161.68  | 72316.17  | 52286.82  |
| 45820.73  | 60499.1   | 54028.58  | 49126.33  | 53031.54  | 49861.87  | 62017.24  | 53449.19  | 60817.64  | 67622.79  |
| 48079.96  | 54449.8   | 54743.01  | 42020.61  | 53985.28  | 50644.12  | 56429.89  | 60138.11  | 58770.78  | 62639.31  |
| 46696.93  | 55473.95  | 49741.11  | 43417.05  | 50939.84  | 51707.54  | 51730.23  | 47695.84  | 56045.45  | 64706.15  |



|           |           |           |           |           |           |           |           |           |           |
|-----------|-----------|-----------|-----------|-----------|-----------|-----------|-----------|-----------|-----------|
| LP381.188 | LP381.189 | LP381.188 |
| 49284.4   | 76956.8   | 54820.26  | 54937.91  | 58481.52  | 86068.6   | 36522.97  | 69085.35  | 62705.7   | 46410.85  |
| 77997.66  | 46102.92  | 51346.32  | 53062.98  | 42949.82  | 94167.26  | 40245.27  | 66191.92  | 56651.47  | 68718.68  |
| 65084.01  | 57200.11  | 55486.37  | 51598.03  | 44643.3   | 73502.08  | 45490.08  | 62477.65  | 56658.97  | 51496.21  |
| 58979.07  | 54747.5   | 57307.28  | 53921.61  | 48263.1   | 67759.42  | 47426.85  | 55367.38  | 57460.86  | 53700.21  |
| 59350.88  | 63942.94  | 50449.94  | 44300.3   | 45408.76  | 68292.05  | 45990.94  | 52849.77  | 60888.74  | 54332.75  |

|           |           |           |           |           |           |           |           |           |           |
|-----------|-----------|-----------|-----------|-----------|-----------|-----------|-----------|-----------|-----------|
| LP381.189 | LP381.189 | LP381.188 | LP381.189 | LP381.188 | LP381.189 | LP381.189 | LP381.188 | LP381.188 | LP381.188 |
| 57794.78  | 59020.88  | 51151.73  | 72345.1   | 75014.38  | 72275.29  | 81250     | 61374.64  | 81284.22  | 66137.82  |
| 79979.08  | 58179.91  | 73055.57  | 51249.57  | 48878.13  | 43425.65  | 52254.61  | 60273.42  | 59653.79  | 65414.46  |
| 61991.05  | 58348.37  | 61750     | 51179.42  | 60680.86  | 56100.73  | 64923.07  | 67952.65  | 48676.24  | 54741.75  |
| 51406.01  | 54864.6   | 61540.2   | 47766.84  | 59721.54  | 50811.13  | 65879.42  | 74689.57  | 51008.26  | 49655.9   |
| 48717.58  | 58912.02  | 54278.61  | 47941.64  | 54613.62  | 54762.28  | 69791.36  | 55537.54  | 48882.52  | 44972.59  |

|           |           |           |           |           |           |           |           |           |           |
|-----------|-----------|-----------|-----------|-----------|-----------|-----------|-----------|-----------|-----------|
| LP381.188 | LP381.188 | LP381.189 | LP381.188 | LP381.188 | LP381.188 | LP381.189 | LP381.188 | LP381.188 | LP381.188 |
| 67730.2   | 35463.26  | 44849.43  | 65607.85  | 35554.8   | 65823.51  | 46148.83  | 31359.61  | 38504.78  | 68522.14  |
| 62784.05  | 43416.42  | 64609.3   | 71230.21  | 39512.61  | 59566.52  | 62739.29  | 28203.88  | 35978.2   | 63748.86  |
| 52432.5   | 47864.89  | 60882.2   | 56163.38  | 24307.92  | 56652.1   | 52566.65  | 34983.92  | 50005.88  | 67214.69  |
| 51951.42  | 54331.55  | 62418.3   | 55024.38  | 24636.78  | 47298.51  | 50603.32  | 33986.52  | 48010.77  | 62423.29  |
| 52476.36  | 46151.21  | 56791.27  | 55092.24  | 24897.44  | 51327.59  | 55052.68  | 32661.41  | 42644.12  | 63186.83  |

|           |           |           |           |           |           |           |           |           |           |
|-----------|-----------|-----------|-----------|-----------|-----------|-----------|-----------|-----------|-----------|
| LP381.188 | LP381.188 | LP381.189 | LP381.188 |
| 49374.32  | 42188.37  | 76399.89  | 59587.61  | 56664.1   | 61653.28  | 69914.75  | 29241.11  | 65067.57  | 65941.31  |
| 95454.29  | 58085.13  | 81629.39  | 53601.15  | 71407.1   | 54163.75  | 68695.2   | 41658     | 59296.46  | 85018.69  |
| 76801.53  | 34415.38  | 72406.9   | 52859.33  | 57921.12  | 62964.33  | 63563.75  | 30941.64  | 84238.52  | 68811.95  |
| 77345.96  | 45517.7   | 61896.58  | 56224.74  | 59016.12  | 67793.63  | 62486.66  | 30614.92  | 66675.63  | 64423.68  |
| 75139.2   | 40258.3   | 76140.06  | 48578.2   | 50252.8   | 66370.49  | 61827.48  | 33127.89  | 69966.21  | 66979.3   |

|           |           |           |           |           |           |           |           |           |           |
|-----------|-----------|-----------|-----------|-----------|-----------|-----------|-----------|-----------|-----------|
| LP381.188 | LP381.188 | LP381.188 | LP381.188 | LP381.189 | LP381.189 | LP381.188 | LP381.188 | LP381.188 | LP381.189 |
| 41671.64  | 60572.03  | 61547.23  | 44309.88  | 75137.9   | 66086.57  | 48433.84  | 48341.92  | 50353.24  | 60725.48  |
| 28231.24  | 55913.77  | 42088.74  | 48964.45  | 83219.25  | 58015.74  | 48133.61  | 65946.44  | 52348.31  | 101343.9  |
| 38615.77  | 47448.28  | 59146.44  | 53485.8   | 68124.37  | 58829.64  | 60803.29  | 49689.71  | 45754.24  | 56354.06  |
| 44213.13  | 41876.71  | 54208.78  | 52223.09  | 62923.28  | 58458.81  | 54306.72  | 48056.67  | 48191.27  | 57084.36  |
| 36188.24  | 43812.32  | 51797.21  | 59170.54  | 65365.44  | 54063.88  | 47569.77  | 47017.2   | 43762.21  | 61635.03  |

|           |           |           |           |           |           |           |           |           |           |
|-----------|-----------|-----------|-----------|-----------|-----------|-----------|-----------|-----------|-----------|
| LP381.188 | LP381.188 | LP381.189 | LP381.188 | LP381.188 | LP381.188 | LP381.188 | LP381.189 | LP381.189 | LP381.188 |
| 40441.58  | 46016.28  | 63649.63  | 58182.85  | 64890.43  | 84516.31  | 38353.99  | 60348.97  | 87294.09  | 35137.62  |
| 29701.53  | 69338.41  | 68018.48  | 52915.96  | 68466.58  | 64900.63  | 47113     | 61930.62  | 90395.5   | 34415.85  |
| 38327.17  | 74461.43  | 62300.56  | 68398.34  | 57330.57  | 69646.55  | 50901.27  | 63353.72  | 73070.57  | 38153.3   |
| 37853.74  | 70875.12  | 57730.65  | 65717.04  | 57228.31  | 66627.95  | 52949.1   | 64409.74  | 64988.95  | 37808.64  |
| 30447.55  | 75449.98  | 53458.32  | 61171.73  | 56421.11  | 66978.61  | 41790.79  | 62523.36  | 66202.78  | 39071.07  |

|           |           |           |           |           |           |           |           |           |           |
|-----------|-----------|-----------|-----------|-----------|-----------|-----------|-----------|-----------|-----------|
| LP381.188 | LP381.189 | LP381.188 | LP381.189 | LP381.188 | LP381.188 | LP381.188 | LP381.283 | LP381.283 | LP381.283 |
| 31987.37  | 70315.35  | 48626.33  | 77988.98  | 46424.03  | 57353.12  | 29503.3   | 93153.33  | 127566.4  | 76782.3   |
| 47475.28  | 57195.02  | 26145.53  | 71846.3   | 46231.05  | 70060.52  | 47277.35  | 115856.3  | 148534.4  | 109544.2  |
| 44240.23  | 74830.68  | 43813.85  | 65395.33  | 43740.08  | 62947.28  | 38097.56  | 110700.7  | 92266.13  | 81041.09  |
| 45462.52  | 72589.76  | 46498.22  | 66301.63  | 40200.96  | 59826.7   | 43609.32  | 121151    | 139871.3  | 93122.83  |
| 40814.66  | 73355.13  | 41394.08  | 67001.39  | 37648.16  | 57385.4   | 38721.66  | 86913.26  | 137257    | 157234.2  |

|           |           |           |           |           |           |           |           |           |           |
|-----------|-----------|-----------|-----------|-----------|-----------|-----------|-----------|-----------|-----------|
| LP381.283 |
| 105830.5  | 136241    | 140187.9  | 94400.29  | 102556.9  | 50663.81  | 85720.4   | 105635.3  | 128376.2  | 315014.1  |
| 77146.04  | 123180.5  | 110854.8  | 95572.99  | 105989.5  | 69369.53  | 82859.21  | 98077.38  | 116618.6  | 216788.7  |
| 55227.64  | 128920.6  | 137699.1  | 61198.3   | 82408.88  | 92958.3   | 85073.66  | 109188.3  | 190569.9  | 188706.8  |
| 52935.68  | 146608    | 85523.04  | 64417.64  | 119296.3  | 52402.77  | 172809.1  | 139442.9  | 97703.9   | 314501.3  |
| 58387.1   | 191969.3  | 110866    | 83504.95  | 110069    | 52036.22  | 82862.66  | 118000.3  | 99191.62  | 164449    |



|           |           |           |           |           |           |           |           |           |           |
|-----------|-----------|-----------|-----------|-----------|-----------|-----------|-----------|-----------|-----------|
| LP381.283 | LP381.282 |
| 490363.3  | 702932.2  | 1418556   | 532761    | 470750.3  | 1358702   | 721914.2  | 882491.5  | 744930.3  | 686238.7  |
| 548392.2  | 379879.2  | 1478961   | 989972.3  | 499610.3  | 1276964   | 661955.4  | 750740.5  | 743192.9  | 569282.8  |
| 501783.5  | 761877.8  | 1418752   | 918176.8  | 483315.7  | 1432496   | 750310.9  | 873182.3  | 789359.1  | 793959    |
| 337081    | 675553    | 668367.3  | 671344.5  | 462312.1  | 1340051   | 650860.2  | 745693.2  | 754715.2  | 684005.3  |
| 542818.4  | 753408.1  | 1323849   | 974431.6  | 563850.5  | 1252011   | 700507.5  | 867962.6  | 775428.4  | 670919.4  |

|           |           |           |           |           |           |           |           |           |           |
|-----------|-----------|-----------|-----------|-----------|-----------|-----------|-----------|-----------|-----------|
| LP381.283 |
| 1900594   | 620258    | 1104294   | 720024.7  | 519051.6  | 758788.1  | 655115.5  | 1602978   | 696041.8  | 1339681   |
| 835056.2  | 586203.3  | 1163890   | 650110.7  | 329017.2  | 846297.7  | 678259.8  | 1845646   | 789662.9  | 1293636   |
| 2111894   | 618333.6  | 1177334   | 576670.2  | 568916    | 765106.5  | 671621.6  | 1950156   | 674020.9  | 1310943   |
| 2028471   | 617800.9  | 1021717   | 676254.7  | 386660.2  | 798739.8  | 389836.6  | 660797.4  | 679379.4  | 1356662   |
| 2092315   | 587032.3  | 958738.4  | 639100.6  | 571948.8  | 780967.3  | 667521.5  | 706818.1  | 625921.9  | 1328349   |

|           |           |           |           |           |           |           |           |           |           |
|-----------|-----------|-----------|-----------|-----------|-----------|-----------|-----------|-----------|-----------|
| LP381.283 |
| 980815.8  | 707906    | 432063.9  | 1213210   | 622234.4  | 263523.9  | 822922.8  | 1832307   | 796662.2  | 844700.8  |
| 1008860   | 710342.3  | 821110.7  | 1144536   | 632039    | 1004552   | 885967.6  | 1765763   | 742130.8  | 823217.9  |
| 1039545   | 430656.6  | 783196.5  | 1233507   | 666702.9  | 827984.1  | 836718.5  | 1817339   | 732019.9  | 872382.6  |
| 984130    | 611439.3  | 850542.5  | 1066110   | 675172.1  | 763219.3  | 972812.7  | 1793468   | 574673    | 816355.4  |
| 1020763   | 698272.2  | 797555.4  | 1152798   | 654085    | 785618.1  | 570519.3  | 747678.5  | 773306.4  | 760401.3  |

|           |           |           |           |           |           |           |           |           |           |
|-----------|-----------|-----------|-----------|-----------|-----------|-----------|-----------|-----------|-----------|
| LP381.283 | LP381.283 | LP381.283 | LP381.284 | LP381.283 | LP381.283 | LP381.283 | LP381.283 | LP381.283 | LP381.283 |
| 866556.4  | 968404.2  | 1258463   | 1438094   | 684122.8  | 897976.6  | 953660.2  | 979743.8  | 661766.4  | 1156411   |
| 836340.4  | 1018561   | 1267972   | 1586277   | 735005.2  | 898619.1  | 876331.7  | 947468.9  | 971058    | 1248691   |
| 662711.3  | 1032691   | 1315391   | 1659182   | 788185    | 883935.6  | 899897.4  | 957604.4  | 952170.7  | 1408091   |
| 512401.9  | 1005671   | 1251926   | 1497349   | 716912.3  | 832060.9  | 886598.1  | 934651.1  | 768896.8  | 1266940   |
| 844371.1  | 921066.7  | 1225357   | 1463327   | 792193.9  | 885260.2  | 856382    | 840603.3  | 976855.2  | 762791.3  |

|           |           |           |           |           |           |           |           |           |           |
|-----------|-----------|-----------|-----------|-----------|-----------|-----------|-----------|-----------|-----------|
| LP381.283 |
| 1321160   | 818434.2  | 1137898   | 946365.9  | 1162383   | 727878.6  | 1115074   | 358347.3  | 715984.6  | 990415.6  |
| 1394295   | 870752.9  | 1161367   | 1023025   | 1181163   | 761195.4  | 1137194   | 635416.4  | 691024.8  | 1042616   |
| 1432072   | 907314.9  | 1202771   | 1053758   | 1300016   | 777817    | 1112536   | 661861.2  | 716745.4  | 1030339   |
| 877154.8  | 852904.9  | 1127789   | 648254    | 931027.7  | 810352.3  | 1152787   | 622172.4  | 674550.5  | 1069904   |
| 1409622   | 811991    | 1218373   | 884785.4  | 1183006   | 628064.2  | 1133771   | 636866.1  | 684455.9  | 982156.7  |

|           |           |           |           |           |           |           |           |           |           |
|-----------|-----------|-----------|-----------|-----------|-----------|-----------|-----------|-----------|-----------|
| LP381.283 | LP381.283 | LP381.283 | LP381.283 | LP381.283 | LP381.297 | LP381.297 | LP381.297 | LP381.297 | LP381.298 |
| 1516201   | 1728229   | 612289.3  | 676127.7  | 2216010   | 3968101   | 2938251   | 947331.2  | 2444964   | 1540271   |
| 1075601   | 1845805   | 643544.8  | 635327.3  | 2247760   | 4874819   | 3554214   | 1496340   | 1488235   | 873897.5  |
| 1552228   | 1770478   | 623396.2  | 658270.1  | 418701.4  | 5146091   | 3666633   | 981099.9  | 2048554   | 1190669   |
| 1468945   | 1743242   | 619044.8  | 634790.9  | 2024456   | 5912453   | 3080373   | 1228708   | 1433795   | 1129356   |
| 1486484   | 1675289   | 577385.9  | 692655.7  | 2161544   | 6787430   | 3154628   | 1375913   | 2425279   | 1072500   |

|            |            |            |            |            |            |           |            |            |            |
|------------|------------|------------|------------|------------|------------|-----------|------------|------------|------------|
| LP381.297! | LP381.297! | LP381.297! | LP381.297! | LP381.297! | LP381.297! | LP381.297 | LP381.297! | LP381.297! | LP381.297! |
| 1433621    | 935053.6   | 939715.1   | 1888222    | 878648     | 705283.9   | 967780.5  | 1166166    | 1369868    | 755607.8   |
| 774207.1   | 928673.1   | 1001088    | 1967832    | 1055105    | 1198203    | 962227.7  | 899744.5   | 999685.4   | 933854.7   |
| 927738.8   | 700865.9   | 837566     | 1674829    | 1499407    | 758634.2   | 1040612   | 962861.6   | 938960     | 855443.1   |
| 929165.3   | 920146.2   | 633449.5   | 2109082    | 1210596    | 1167292    | 974221.3  | 894011.3   | 1258246    | 1008233    |
| 870660.6   | 990481.6   | 1169876    | 1757753    | 1217443    | 917717.5   | 716403.4  | 906844.5   | 1080590    | 824500.7   |

|           |           |           |           |           |           |           |           |           |           |
|-----------|-----------|-----------|-----------|-----------|-----------|-----------|-----------|-----------|-----------|
| LP381.297 | LP381.298 | LP381.297 | LP381.297 | LP381.297 | LP381.297 | LP381.297 | LP381.298 | LP381.298 | LP381.297 |
| 980177.5  | 1202669   | 840840.3  | 2026066   | 683371.5  | 1948953   | 2126229   | 1078399   | 1609128   | 860757.6  |
| 1201473   | 1154283   | 993695.7  | 1908086   | 883933.8  | 2040930   | 2204504   | 1146310   | 1746614   | 985737.5  |
| 833169.3  | 1434013   | 796148.8  | 2152264   | 831018.1  | 1987877   | 1412370   | 1207343   | 1734749   | 1191797   |
| 1343743   | 1522843   | 1043247   | 3071961   | 836564.7  | 1761236   | 1286142   | 1050969   | 2125197   | 661887.8  |
| 1143151   | 1285362   | 797170.6  | 1887771   | 1048591   | 2248407   | 1673732   | 1269866   | 1382905   | 787844.8  |



|           |           |           |           |           |           |           |           |           |           |
|-----------|-----------|-----------|-----------|-----------|-----------|-----------|-----------|-----------|-----------|
| LP381.298 | LP381.297 | LP381.297 | LP381.298 | LP381.298 | LP381.298 | LP381.298 | LP381.297 | LP381.297 | LP381.297 |
| 863596    | 2478132   | 968236.5  | 1511664   | 813655.9  | 766773.4  | 1428275   | 1603561   | 1715664   | 674106.2  |
| 1500830   | 1670332   | 699836.7  | 1451217   | 1019778   | 786868.8  | 2068358   | 1124310   | 1933163   | 689416.3  |
| 1133105   | 1816417   | 646241.3  | 1055386   | 1107756   | 771374.9  | 1481904   | 1822843   | 1503049   | 743462    |
| 867162.8  | 1863022   | 886528    | 1034920   | 1327694   | 660727.5  | 1768166   | 2270780   | 1275273   | 735973.4  |
| 1290353   | 1948856   | 693059.9  | 1250418   | 943694.3  | 588098.8  | 1223903   | 1666783   | 1495434   | 537133.8  |

|           |           |           |           |           |           |           |           |           |           |
|-----------|-----------|-----------|-----------|-----------|-----------|-----------|-----------|-----------|-----------|
| LP381.298 | LP381.298 | LP381.298 | LP381.298 | LP381.297 | LP381.297 | LP381.297 | LP381.297 | LP381.298 | LP381.298 |
| 1397931   | 779574.2  | 1351503   | 1437757   | 867098.2  | 852705.3  | 1081993   | 556638.3  | 543756.3  | 1321188   |
| 1260720   | 823421.1  | 979655.5  | 1172808   | 1021301   | 987415.6  | 1526210   | 665401.6  | 756721.6  | 1163830   |
| 1264311   | 881551.4  | 1342456   | 1486307   | 1064708   | 1052290   | 1218442   | 625428.9  | 904226.9  | 1002203   |
| 1146770   | 898547.4  | 977507.1  | 1404433   | 956558.4  | 641785.2  | 1627008   | 727908.3  | 651602.5  | 1548469   |
| 865623.2  | 768437.6  | 968979.1  | 964296.5  | 1338284   | 1009620   | 1261661   | 694424.6  | 752109.2  | 983560.7  |

|            |           |            |            |            |           |            |            |            |           |
|------------|-----------|------------|------------|------------|-----------|------------|------------|------------|-----------|
| LP381.297! | LP381.298 | LP381.297! | LP381.297! | LP381.297! | LP381.298 | LP381.297! | LP381.297! | LP381.297! | LP381.297 |
| 1702354    | 937103.5  | 1221718    | 990311.8   | 1668609    | 1202095   | 1326768    | 833810.6   | 887924.5   | 2745723   |
| 2005906    | 665039.4  | 986292.1   | 1025871    | 1048149    | 1202206   | 1133772    | 946738.1   | 768449.6   | 2252220   |
| 1425010    | 903073.4  | 1075058    | 917082.7   | 1274024    | 1729437   | 1400178    | 1418543    | 897537.6   | 2151215   |
| 1809538    | 639313.4  | 1176158    | 1509874    | 1125026    | 962877.4  | 1188565    | 1187447    | 780834.4   | 2149373   |
| 1107913    | 767451.7  | 804029.5   | 771055.5   | 1477114    | 1651882   | 1615182    | 924838.7   | 789422.7   | 2183923   |

|           |           |           |           |           |           |           |           |           |           |
|-----------|-----------|-----------|-----------|-----------|-----------|-----------|-----------|-----------|-----------|
| LP381.298 | LP381.297 | LP381.297 | LP381.298 | LP381.297 | LP381.298 | LP381.298 | LP381.297 | LP381.298 | LP381.297 |
| 663176.7  | 1330330   | 1020689   | 907373.1  | 925832.2  | 817125.9  | 1099273   | 1036583   | 521722.6  | 1741381   |
| 586340.3  | 1374776   | 845599    | 548212.7  | 931339.3  | 887314.5  | 1080996   | 908686.7  | 609720    | 1356232   |
| 752754.1  | 1046619   | 835787.1  | 620750.2  | 581937.9  | 1432861   | 951114.5  | 882369.8  | 589822.2  | 2092225   |
| 701978.7  | 1313907   | 817073.2  | 658756.2  | 610887.8  | 790641.4  | 959774.5  | 766376.7  | 643755.5  | 1494659   |
| 838681.6  | 1084866   | 714587.8  | 737616.4  | 777367.7  | 911471.2  | 979465.2  | 757859.6  | 552863.6  | 1720127   |

|           |           |           |           |           |           |           |           |           |           |
|-----------|-----------|-----------|-----------|-----------|-----------|-----------|-----------|-----------|-----------|
| LP381.297 | LP381.298 | LP381.297 | LP381.298 | LP381.297 | LP381.297 | LP381.297 | LP381.297 | LP381.298 | LP381.337 |
| 1304245   | 656911.7  | 709943    | 724813    | 509622.2  | 1196275   | 912052.4  | 434972.2  | 134098.6  | 1076239   |
| 1054525   | 899107.8  | 768736.9  | 727375.6  | 729828.8  | 1312835   | 680141.9  | 364668    | 139582.3  | 1074218   |
| 1064805   | 963945.4  | 631360.6  | 642062.1  | 515195.7  | 1295079   | 805026.8  | 270420.8  | 145562.1  | 1075159   |
| 1185588   | 853993.8  | 522716.2  | 662240.6  | 1033158   | 1191164   | 568463.6  | 400651.1  | 130045.1  | 993878.8  |
| 1539443   | 1036600   | 668678.1  | 680774.7  | 420730.9  | 1405239   | 519693.1  | 376492.4  | 134357.1  | 1059895   |

|           |           |           |           |           |           |           |           |           |           |
|-----------|-----------|-----------|-----------|-----------|-----------|-----------|-----------|-----------|-----------|
| LP381.336 | LP381.355 | LP381.372 | LP381.384 | LP382.207 | LP382.207 | LP382.207 | LP382.207 | LP382.227 | LP382.244 |
| 624279.1  | 31719     | 109756.4  | 93242.59  | 116809.7  | 87872.09  | 81520.31  | 75362.42  | 100069.6  | 96299.12  |
| 601826.5  | 31888.69  | 127897.3  | 95795.45  | 139024.6  | 91827.01  | 76820.15  | 77450.91  | 99766.41  | 133557.7  |
| 669284.4  | 33778.4   | 116173.3  | 95554.47  | 118102    | 90419.93  | 78315.01  | 75506.31  | 90665.56  | 100746.8  |
| 701329.6  | 31906.54  | 110273.8  | 96124.39  | 120572.5  | 89356.22  | 95860.83  | 69784.33  | 81361.88  | 123793.1  |
| 672288.6  | 29505.56  | 117727.1  | 114620.3  | 124161.1  | 103437.3  | 87653.39  | 72588.72  | 82377.57  | 114111.8  |

|           |           |           |           |           |           |           |           |           |           |
|-----------|-----------|-----------|-----------|-----------|-----------|-----------|-----------|-----------|-----------|
| LP382.243 | LP382.244 | LP382.244 | LP382.243 | LP382.244 | LP382.244 | LP382.244 | LP382.244 | LP382.243 | LP382.243 |
| 118167.3  | 98138.12  | 111213.7  | 82349.33  | 124242.3  | 72595.14  | 71488.63  | 119952    | 77309.02  | 85351.31  |
| 182399.9  | 102397    | 105997    | 82524.91  | 122880.7  | 67481.85  | 74329.54  | 126935.4  | 78122.15  | 85395.76  |
| 138935.9  | 121690.1  | 110307.6  | 82275.57  | 110100.2  | 64890.24  | 77870.09  | 138749.6  | 86172.44  | 103103    |
| 103693.7  | 85158     | 101136    | 79511.66  | 86189.59  | 111377.4  | 73754.39  | 97954.15  | 73092.21  | 85768.86  |
| 133822.6  | 104135.4  | 130207.7  | 81371.2   | 94902.55  | 65767.75  | 74581.31  | 130704.4  | 75637.1   | 77742.69  |

|           |           |           |           |           |           |           |           |           |           |           |
|-----------|-----------|-----------|-----------|-----------|-----------|-----------|-----------|-----------|-----------|-----------|
| LP382.243 | LP382.243 | LP382.243 | LP382.244 | LP382.243 | LP382.244 | LP382.244 | LP382.244 | LP382.244 | LP382.244 | LP382.244 |
| 64555.39  | 75797.04  | 62626.92  | 97390.32  | 88838.17  | 58925.97  | 85240.7   | 92526.78  | 86503.85  | 60089.52  |           |
| 65999.06  | 78007.96  | 56614.58  | 89587.54  | 86063.15  | 61608.63  | 79106.84  | 97028.19  | 82865.78  | 63243.73  |           |
| 72494.33  | 75563.45  | 58519.91  | 90189.22  | 87368.45  | 60937.34  | 90223.85  | 97654.26  | 90703.25  | 65980.75  |           |
| 75400.52  | 78117.18  | 76641.33  | 93081.12  | 77087.88  | 63038.23  | 89498.94  | 97058.52  | 87521.4   | 65370.37  |           |
| 67593.92  | 73411.63  | 58191.9   | 95620.73  | 71124     | 87853.49  | 86030.27  | 102345.3  | 75698.59  | 65520.46  |           |



|           |           |           |           |           |           |           |           |           |           |
|-----------|-----------|-----------|-----------|-----------|-----------|-----------|-----------|-----------|-----------|
| LP382.244 | LP382.243 | LP382.244 |
| 90278.48  | 93770.61  | 79908.04  | 64875.91  | 110909.4  | 64091.38  | 86350.41  | 67920.03  | 65540.8   | 73233.7   |
| 92120.38  | 89237.54  | 77833.16  | 70409.46  | 103614.5  | 61341.52  | 83352.12  | 75725.32  | 63482.53  | 76732.23  |
| 89464.57  | 100963.7  | 79518.61  | 75084.58  | 105710.7  | 64025.09  | 90948.55  | 74297.63  | 65914.52  | 83271.02  |
| 90548.03  | 94779.84  | 80273.28  | 71893.64  | 112193.9  | 66135.53  | 86789.49  | 62938.33  | 61426.92  | 77093.19  |
| 89210.13  | 85684.42  | 71874.8   | 65978.67  | 115160.2  | 66474.16  | 93634.59  | 70533.55  | 66881.8   | 77564.56  |

|           |           |           |           |           |           |           |           |           |           |
|-----------|-----------|-----------|-----------|-----------|-----------|-----------|-----------|-----------|-----------|
| LP382.244 | LP382.244 | LP382.243 | LP382.244 | LP382.244 | LP382.286 | LP382.286 | LP382.286 | LP382.285 | LP382.285 |
| 46076.7   | 81599.39  | 102141    | 79826.85  | 72494.62  | 144914.7  | 200765.9  | 218512.3  | 165595.5  | 202027    |
| 55161.17  | 69216.04  | 105086.6  | 83399.21  | 74436.18  | 161210.9  | 221527.6  | 219426.5  | 153339.2  | 196570.6  |
| 57409.2   | 68693.58  | 102981.1  | 82784.39  | 78369.85  | 145666.1  | 232471.7  | 225919.5  | 148463    | 196429.9  |
| 49620.06  | 69739.82  | 100147    | 87409.4   | 70919.91  | 163596.8  | 192586.7  | 221368.9  | 146030.2  | 202165.4  |
| 50272.67  | 76627.68  | 101735.8  | 89708.43  | 74513.56  | 148855.8  | 196848.1  | 199417.6  | 169885.9  | 190464.8  |

|           |           |           |           |           |           |           |           |           |           |
|-----------|-----------|-----------|-----------|-----------|-----------|-----------|-----------|-----------|-----------|
| LP382.286 | LP382.285 | LP382.285 | LP382.285 | LP382.285 | LP382.286 | LP382.286 | LP382.285 | LP382.286 | LP382.285 |
| 187298.2  | 200027.7  | 204267    | 159639.3  | 205595.4  | 188663.7  | 207968.5  | 298388.6  | 152178.6  | 189171.6  |
| 186611.9  | 179873.1  | 214830.7  | 159183.1  | 204463.3  | 177675.3  | 217610.8  | 301600.8  | 155661.6  | 164248    |
| 179670.2  | 185941.4  | 208573    | 167429.5  | 221388.8  | 194934.7  | 231759.1  | 298674.5  | 146665.8  | 203473.9  |
| 194626.4  | 189840.9  | 209527.5  | 184885.5  | 209771.5  | 179305.6  | 194391.6  | 287131.9  | 151761.4  | 169999.5  |
| 184639.4  | 188036.2  | 188911.1  | 150755.5  | 182453.9  | 163649.1  | 197840.1  | 287990.5  | 142926.5  | 198994.8  |

|           |           |           |           |           |           |           |           |           |           |
|-----------|-----------|-----------|-----------|-----------|-----------|-----------|-----------|-----------|-----------|
| LP382.286 | LP382.286 | LP382.285 | LP382.286 | LP382.286 | LP382.285 | LP382.301 | LP382.301 | LP382.301 | LP382.301 |
| 207979.7  | 320696.3  | 116235.1  | 180847.7  | 168819.3  | 114742.7  | 824360.8  | 286640.4  | 553048.9  | 638452.5  |
| 213341.2  | 337332.4  | 128620.4  | 190462.4  | 188837.2  | 135429.5  | 775952    | 354608.9  | 537942.3  | 549424.9  |
| 210916.2  | 350437    | 131451.2  | 204370.4  | 181193.5  | 135292.6  | 831201.7  | 401456    | 818241.6  | 615719.5  |
| 200968.7  | 334371.9  | 124482.2  | 187996.7  | 171421.2  | 135356.3  | 747159.2  | 448407.3  | 439250.3  | 402602.7  |
| 206654.7  | 321633.4  | 121549.8  | 181026.8  | 155269.5  | 133305.1  | 761539.3  | 368582    | 650404.7  | 578347.7  |

|           |           |           |           |           |           |           |           |           |           |
|-----------|-----------|-----------|-----------|-----------|-----------|-----------|-----------|-----------|-----------|
| LP382.301 |
| 214235.7  | 212829.9  | 347083    | 245961.4  | 373073.8  | 393161    | 158854.1  | 322573.1  | 429612.3  | 428826.4  |
| 211234.4  | 266789.1  | 471480.2  | 247131    | 279883.7  | 344453    | 173832.9  | 331520.7  | 413135.2  | 280411.8  |
| 202519.1  | 211434.9  | 413064    | 280820    | 406206.6  | 323300.4  | 148561.3  | 245575.1  | 336229.5  | 280013.7  |
| 234990    | 258978.8  | 366712.1  | 223412.4  | 396002.6  | 270662.8  | 154756.9  | 268846.5  | 393277.8  | 270278.1  |
| 263765.2  | 198191.1  | 411265.4  | 224839.8  | 354675.1  | 270808.1  | 149883.9  | 262370.7  | 317456.3  | 280399.8  |

|           |           |           |           |           |           |           |           |           |           |
|-----------|-----------|-----------|-----------|-----------|-----------|-----------|-----------|-----------|-----------|
| LP382.301 |
| 172171.2  | 196361.7  | 292544.8  | 242225.2  | 464312.6  | 217449.3  | 207775.2  | 238358.2  | 246910.6  | 245864    |
| 181224.5  | 185675.8  | 216708    | 258970.1  | 409129.8  | 250929.3  | 314616.5  | 237199.8  | 255922.4  | 201721.3  |
| 137306.3  | 259334.5  | 277681.6  | 259453.6  | 315018.3  | 235184.2  | 240374.2  | 262181.6  | 191979.8  | 251831.4  |
| 206005    | 251032.8  | 306855    | 263557.7  | 311368.2  | 249292.5  | 213588.6  | 198011.2  | 205682.7  | 242215.1  |
| 165272.9  | 232436.5  | 233988.6  | 231926.3  | 246820    | 220470.7  | 208083.5  | 248451.5  | 267751.5  | 234014.1  |

|           |           |           |           |           |           |           |           |           |           |
|-----------|-----------|-----------|-----------|-----------|-----------|-----------|-----------|-----------|-----------|
| LP382.301 |
| 271712.6  | 246500.2  | 170443.4  | 341426.1  | 187904.2  | 314841.9  | 209725.7  | 294332.1  | 185808.2  | 323148.7  |
| 152757.1  | 262887.9  | 176044.4  | 335620    | 200624.7  | 249686.9  | 209950.7  | 304840.1  | 192860.9  | 264799.9  |
| 183132.5  | 265637.5  | 191847.3  | 368688.3  | 227125.2  | 238913    | 215617.9  | 249979.4  | 278696.9  | 327322.3  |
| 168956.2  | 240162.2  | 178581.3  | 338543.4  | 199253.4  | 236866.4  | 217536.7  | 331595.2  | 184221.9  | 324302.5  |
| 162569    | 232471    | 162740.2  | 294004.7  | 193459.1  | 228978.1  | 215368.2  | 311159.5  | 184374.3  | 291663.5  |

|           |           |           |           |           |           |           |           |           |           |
|-----------|-----------|-----------|-----------|-----------|-----------|-----------|-----------|-----------|-----------|
| LP382.301 |
| 209407.4  | 276333.4  | 190962.1  | 304795.5  | 149697    | 257109.8  | 152527.5  | 134062.5  | 191087    | 183357    |
| 211482.1  | 256580.3  | 202607.2  | 212419.6  | 229256.9  | 266355.4  | 135765.9  | 185894.7  | 194862.2  | 187833.9  |
| 274188.9  | 399933.7  | 205207    | 217422.7  | 155846.1  | 267722.6  | 130476.1  | 159556.8  | 200460.5  | 186347.5  |
| 194936.8  | 264361.6  | 216060.2  | 190208.1  | 146448.5  | 248200.4  | 135287.5  | 135675.5  | 202147.4  | 173462.5  |
| 199268    | 244816.7  | 183924.7  | 197304.6  | 151629.7  | 256259.9  | 145668.7  | 126082.8  | 200863.1  | 183232.8  |



|           |           |           |           |           |           |           |           |           |           |
|-----------|-----------|-----------|-----------|-----------|-----------|-----------|-----------|-----------|-----------|
| LP382.301 |
| 190530.6  | 137160.8  | 168480.2  | 207218.6  | 218891.7  | 141997.2  | 217512.2  | 180579.8  | 125945.2  | 241687.3  |
| 209213.7  | 150143.4  | 213453    | 218176    | 198369.1  | 142574.6  | 227653    | 167995.8  | 137878    | 236638.2  |
| 270681.7  | 154182.5  | 225868.5  | 219033.2  | 215693.2  | 141928    | 256775.9  | 165626.1  | 131343.5  | 233607.8  |
| 197391.4  | 166613.4  | 215536.9  | 195598.1  | 190108.1  | 137672.4  | 210914    | 164382.9  | 139573.3  | 226752.5  |
| 180609.9  | 145740    | 211574.9  | 184393.1  | 192902.3  | 146479    | 193583.3  | 173695.3  | 126308.2  | 216726.2  |

|           |           |           |           |           |           |           |           |           |           |
|-----------|-----------|-----------|-----------|-----------|-----------|-----------|-----------|-----------|-----------|
| LP382.301 | LP382.367 |
| 185811.4  | 181080.1  | 170456.1  | 196597.1  | 140831.6  | 147693.4  | 160971.1  | 189973    | 150993.7  | 22542.16  |
| 156432.4  | 186193.9  | 179440.8  | 197659.3  | 151150.3  | 136863.7  | 163721.7  | 184939.5  | 138613.5  | 24971.03  |
| 147503    | 170076.7  | 168008.1  | 211611.2  | 144152    | 140629.3  | 160644.5  | 192348.6  | 145832.1  | 20261.5   |
| 146674.4  | 179588.3  | 169711.5  | 189487.5  | 142117.6  | 128949.5  | 158650.7  | 188689.3  | 138537    | 14553.32  |
| 145719.6  | 180239.5  | 165916.2  | 176846.3  | 143381    | 139713.7  | 157432.4  | 189675.8  | 123325.4  | 20086.32  |

|           |           |           |           |           |           |           |           |           |           |
|-----------|-----------|-----------|-----------|-----------|-----------|-----------|-----------|-----------|-----------|
| LP382.368 | LP382.379 | LP382.404 | LP382.404 | LP382.404 | LP383.167 | LP383.167 | LP383.167 | LP383.168 | LP383.168 |
| 24834.74  | 63773.31  | 214666.1  | 12795.19  | 7269.581  | 176721    | 59042.96  | 69984     | 68954.87  | 68783.76  |
| 23520.51  | 56547.26  | 248137.6  | 13364.54  | 6542.789  | 167781.6  | 64788.41  | 66332.93  | 38356.88  | 37184.73  |
| 37714.41  | 55281.26  | 400416.3  | 20674.18  | 10745.9   | 163257.7  | 58094.25  | 63108.21  | 111874.6  | 38055.94  |
| 38465.74  | 66744.43  | 490252.2  | 25147.19  | 10659.43  | 175417.4  | 55879.76  | 61986.98  | 47381.45  | 31137.19  |
| 46500.32  | 57274.83  | 541450.8  | 26947.66  | 12919.94  | 180108.2  | 56426.86  | 67805.06  | 125673.4  | 68788.21  |

|           |           |           |           |           |           |           |           |           |           |
|-----------|-----------|-----------|-----------|-----------|-----------|-----------|-----------|-----------|-----------|
| LP383.168 | LP383.168 | LP383.167 | LP383.167 | LP383.168 | LP383.168 | LP383.167 | LP383.168 | LP383.168 | LP383.168 |
| 73618.88  | 50318.39  | 96163.84  | 50468.27  | 181035.4  | 32911.77  | 254821.3  | 111733.9  | 332656.1  | 252116.4  |
| 40021.95  | 56154.07  | 39125.79  | 23434.73  | 202889.4  | 71910.13  | 299309.5  | 366273.7  | 328172.1  | 233300.1  |
| 63309.4   | 63771.18  | 66010.08  | 48411.54  | 73799.15  | 32467.07  | 290258.6  | 355677.2  | 140160.5  | 61185.46  |
| 60681.49  | 207570.5  | 93776.34  | 24372.84  | 191725.9  | 62465.47  | 291148.6  | 67311.94  | 392425.7  | 249113.8  |
| 61558.22  | 202824.4  | 106703.2  | 44622.58  | 202262.6  | 65330.35  | 319106.4  | 377136    | 179891.1  | 272543.3  |

|           |           |           |           |           |           |           |           |           |           |
|-----------|-----------|-----------|-----------|-----------|-----------|-----------|-----------|-----------|-----------|
| LP383.168 | LP383.168 | LP383.168 | LP383.168 | LP383.167 | LP383.168 | LP383.168 | LP383.168 | LP383.168 | LP383.168 |
| 323320    | 396701.5  | 81589.62  | 377002.7  | 62658.16  | 426426.4  | 55811.21  | 95530.71  | 42973.51  | 50308.42  |
| 312245.3  | 405594.7  | 373429.2  | 337019.1  | 123723.4  | 437116.9  | 247008    | 61178.68  | 94853.19  | 172773.5  |
| 352338.6  | 88518.97  | 92563.17  | 56350.03  | 127144.3  | 418243    | 71017.41  | 259526.4  | 95693.3   | 182061.6  |
| 330652.8  | 407835.9  | 360415.3  | 359012.4  | 117815.3  | 438657.5  | 290659.6  | 255487.5  | 83638.44  | 177249.9  |
| 303388.4  | 406147.9  | 364723.9  | 345418.4  | 129849.1  | 102729.9  | 277280.2  | 259652.7  | 93230.01  | 173016    |

|           |           |           |           |           |           |           |           |           |           |
|-----------|-----------|-----------|-----------|-----------|-----------|-----------|-----------|-----------|-----------|
| LP383.168 | LP383.167 | LP383.168 | LP383.168 |
| 199634    | 352435.6  | 366779.7  | 290688.1  | 194617    | 203951    | 283902.9  | 137563.5  | 161359.6  | 292740.8  |
| 220983.3  | 402721.3  | 67481.63  | 326008.8  | 199427.6  | 204693    | 283947.5  | 135331.6  | 49925.94  | 304042.1  |
| 213617.8  | 130471.5  | 387372.5  | 304718.7  | 204551.4  | 204656.9  | 286107.1  | 146823.7  | 186569.2  | 293857    |
| 212886.8  | 402562.2  | 381395.4  | 289630.8  | 87340.9   | 199549.7  | 102060.2  | 139882.6  | 156779.1  | 103922.3  |
| 216943.5  | 434737.1  | 412367.9  | 306316.1  | 220882.8  | 199018.7  | 312072.4  | 142638.9  | 163128.2  | 302354.1  |

|           |           |           |           |           |           |           |           |           |           |
|-----------|-----------|-----------|-----------|-----------|-----------|-----------|-----------|-----------|-----------|
| LP383.168 | LP383.167 | LP383.168 |
| 59140.97  | 51059.11  | 184691.3  | 166712.6  | 72467.19  | 187901.7  | 264354.7  | 204371.6  | 171199.5  | 198011.5  |
| 266235    | 166205.7  | 178783.7  | 177466.1  | 36121.27  | 181177.5  | 248597.6  | 196912    | 165060.1  | 217009.6  |
| 259238.8  | 161715.3  | 186197.7  | 171801.5  | 72102.1   | 184519.4  | 242092.8  | 212239.7  | 166139.4  | 208791.6  |
| 248903.2  | 164684.2  | 182285.8  | 170069.8  | 66219.8   | 191880.2  | 254022.8  | 212611.9  | 166210    | 207020.3  |
| 255466.4  | 155386.4  | 190826.2  | 180828.7  | 73251.03  | 211417.9  | 242540    | 215077    | 168982.2  | 198905.1  |

|           |           |           |           |           |           |           |           |           |           |
|-----------|-----------|-----------|-----------|-----------|-----------|-----------|-----------|-----------|-----------|
| LP383.168 | LP383.168 | LP383.168 | LP383.168 | LP383.168 | LP383.167 | LP383.168 | LP383.168 | LP383.168 | LP383.168 |
| 258761.3  | 119959.4  | 259214.8  | 218377.4  | 210967.9  | 226849.5  | 521404.9  | 85969.83  | 342929.6  | 279958.9  |
| 257019.9  | 125828.1  | 258950    | 215296.4  | 216969.2  | 58175.58  | 519652.4  | 490643.7  | 345144.9  | 273084.9  |
| 272681    | 140827.5  | 244819.8  | 215748.9  | 220499.9  | 242945.2  | 520489.3  | 460676    | 343358.8  | 285961.9  |
| 258161.2  | 123450.7  | 203658.6  | 210482.8  | 76160.32  | 242079.3  | 516713.3  | 493656.6  | 318911.5  | 275329.1  |
| 253079.1  | 145656.9  | 226205.3  | 207230    | 231655.6  | 240270.9  | 537951.3  | 447641.1  | 336325    | 289673.5  |



|           |           |           |           |           |           |           |           |           |           |
|-----------|-----------|-----------|-----------|-----------|-----------|-----------|-----------|-----------|-----------|
| LP383.168 | LP383.168 | LP383.168 | LP383.168 | LP383.204 | LP383.204 | LP383.204 | LP383.204 | LP383.203 | LP383.204 |
| 266310.3  | 33943.37  | 43536.88  | 59636.63  | 326730.6  | 285086    | 329352.3  | 383805.4  | 283536.4  | 554148.8  |
| 303130.7  | 60943.54  | 41666.98  | 53759.31  | 300393.6  | 546585.2  | 428024.8  | 468329.4  | 194247.7  | 524923.7  |
| 273732.6  | 35437.8   | 53928.11  | 32104.23  | 348352.3  | 431932.4  | 325052.2  | 554740.3  | 291519.9  | 245717.2  |
| 264163.6  | 38009.84  | 111725.7  | 52414.68  | 418412.5  | 504265.7  | 453122.4  | 477477.6  | 349314.6  | 353763.1  |
| 247893.3  | 65770.36  | 108392.6  | 49614.13  | 304570.7  | 340137.5  | 255148.6  | 324652.5  | 262047.6  | 353206.6  |

|           |           |           |           |           |           |           |           |           |           |
|-----------|-----------|-----------|-----------|-----------|-----------|-----------|-----------|-----------|-----------|
| LP383.204 |
| 192183.6  | 514188.5  | 516729.5  | 287655.5  | 383281.1  | 422474.2  | 519045.9  | 280759.2  | 343662.9  | 622379.2  |
| 284278.1  | 475042    | 381759.3  | 328032.9  | 483410.8  | 200506.6  | 446292.7  | 279859.9  | 415594.7  | 486044.7  |
| 219685    | 356795.9  | 399582.7  | 362616.7  | 398984.2  | 247233.9  | 453736    | 257403.9  | 469105.9  | 423917.7  |
| 233341.2  | 432811.1  | 363897.5  | 307151    | 429523.4  | 221624.1  | 524008.4  | 334763.9  | 400006    | 388606.2  |
| 191932.2  | 411081.6  | 536986.9  | 471977.2  | 361081.1  | 219026.3  | 452902.3  | 362627.8  | 324034.6  | 349007.6  |

|           |           |           |           |           |           |           |           |           |           |
|-----------|-----------|-----------|-----------|-----------|-----------|-----------|-----------|-----------|-----------|
| LP383.204 |
| 330963.3  | 249362.2  | 290698.5  | 368195.3  | 390470.8  | 342068.3  | 356276.3  | 351769.6  | 464556.8  | 262286.7  |
| 405077.8  | 213450.8  | 199364.2  | 405554.3  | 315151.3  | 376556.8  | 398463.2  | 278443.2  | 413548.2  | 252451.7  |
| 308286.2  | 314641    | 306211.6  | 517210.8  | 334416.3  | 371487.8  | 623364.7  | 315279.4  | 447357    | 363343.2  |
| 447528.4  | 189126    | 331811    | 294873.4  | 367257.2  | 304736.1  | 332258.2  | 291170.4  | 386212.9  | 315929.6  |
| 328607.8  | 213207.9  | 260576.5  | 439824.7  | 398500.4  | 282820.2  | 435254.5  | 344991.6  | 613433.4  | 280389.8  |

|            |            |            |            |            |            |            |            |            |            |
|------------|------------|------------|------------|------------|------------|------------|------------|------------|------------|
| LP383.204! |
| 451758.9   | 568452.2   | 502486.2   | 282134.7   | 209554.8   | 243631.4   | 345463.7   | 491909.1   | 278614.6   | 313977.8   |
| 394757.9   | 504205     | 417448.3   | 492860.1   | 156268.8   | 176869.2   | 300682.9   | 328798.8   | 276341     | 237703.9   |
| 440951.3   | 326832.7   | 569584.9   | 480343.8   | 332861.3   | 190588.1   | 353740     | 457238.3   | 288512.9   | 243944.8   |
| 259858.9   | 625053.4   | 364806.6   | 387837.9   | 238375     | 233454.5   | 432372     | 389108.8   | 260207     | 211442.9   |
| 325060.3   | 473866.7   | 463795     | 392111.4   | 262094.3   | 140573.1   | 338649.7   | 428672.5   | 221971     | 301605.1   |

|           |           |           |           |           |           |           |           |           |           |
|-----------|-----------|-----------|-----------|-----------|-----------|-----------|-----------|-----------|-----------|
| LP383.204 |
| 489730.6  | 432988.9  | 201274.3  | 168538.7  | 270833.6  | 299126.8  | 412287.6  | 230592.4  | 510751.3  | 161508    |
| 421675.4  | 441987.4  | 212407.1  | 308459    | 195847.1  | 443327.7  | 359850.1  | 425594.3  | 340263    | 176018.1  |
| 436268.6  | 473521.3  | 173496.1  | 203696.6  | 207275.1  | 404886.1  | 277976.2  | 250389.2  | 438682.8  | 160278.5  |
| 588694.4  | 437293.6  | 304478    | 200031.2  | 209333.1  | 389808.6  | 339302.6  | 209163.8  | 489144.3  | 173281.9  |
| 435628.7  | 426331    | 190723    | 204746.6  | 222413.6  | 383191.8  | 369562.2  | 191260.6  | 446936    | 142936.7  |

|           |           |           |           |           |           |           |           |           |           |
|-----------|-----------|-----------|-----------|-----------|-----------|-----------|-----------|-----------|-----------|
| LP383.204 |
| 510827.2  | 440749.9  | 446178.1  | 334432.7  | 105168.2  | 414831.7  | 341110.1  | 213522.4  | 229056.9  | 77267.39  |
| 500619    | 359404.6  | 412513.3  | 428007.5  | 110427.7  | 413608.3  | 317137.5  | 254495.7  | 424731.8  | 53199.12  |
| 379276.8  | 334736.2  | 400859.2  | 297128    | 110339.9  | 458268.7  | 463916.7  | 216689.2  | 319963.7  | 62308.29  |
| 415984.5  | 359358.9  | 510587.8  | 413318.8  | 81990.16  | 475701.9  | 302083.3  | 310180.2  | 274290.2  | 44264.17  |
| 368280.5  | 405866    | 475198.5  | 344432    | 125190.9  | 480501.7  | 292164.7  | 270265.7  | 325205.9  | 54727.64  |

|           |           |           |           |           |           |           |           |           |           |           |
|-----------|-----------|-----------|-----------|-----------|-----------|-----------|-----------|-----------|-----------|-----------|
| LP383.204 |
| 219287.8  | 187657.8  | 528111.7  | 248410.6  | 118749.4  | 89206.51  | 403873.3  | 92181.25  | 67082.07  | 371575.3  |           |
| 297584.1  | 186362.9  | 413011.2  | 172012.1  | 118275.1  | 130284.3  | 443402    | 112854.1  | 67962.96  | 255452.9  |           |
| 242328.3  | 213165    | 366058.9  | 168643.3  | 97669.19  | 85436.93  | 419778.9  | 98870.75  | 47550.71  | 269798.7  |           |
| 276868.3  | 213716.1  | 434650    | 193873.7  | 104246    | 103484.4  | 506397    | 95581.66  | 50278.46  | 189836.9  |           |
| 322018.6  | 230957.3  | 619360.8  | 182426.8  | 107181.9  | 74767.85  | 411501.4  | 90445.07  | 85190.59  | 184664.3  |           |

|           |           |           |           |           |           |           |           |           |           |
|-----------|-----------|-----------|-----------|-----------|-----------|-----------|-----------|-----------|-----------|
| LP383.204 |
| 246657.4  | 212584    | 210281.1  | 236067.5  | 129829.5  | 166839.7  | 224030.1  | 377076.2  | 73012.72  | 63216.78  |
| 262955.7  | 194792.4  | 353820.5  | 286313.5  | 136531.6  | 256313.8  | 234134    | 303040    | 105602.4  | 61995.99  |
| 275841.3  | 197605.2  | 179777.4  | 191868    | 142670.5  | 318446.5  | 241573.9  | 373589.4  | 107883.8  | 59974.74  |
| 241428.8  | 212024.5  | 235368.3  | 236038.9  | 193558.5  | 211132.1  | 158809.2  | 372498.7  | 91566.24  | 61169.82  |
| 345252    | 192612    | 218960.3  | 255414.8  | 115260.8  | 202107.2  | 245408.3  | 366213    | 84280.18  | 76927.17  |



|           |           |           |           |           |           |           |           |           |           |
|-----------|-----------|-----------|-----------|-----------|-----------|-----------|-----------|-----------|-----------|
| LP383.204 | LP383.204 | LP383.204 | LP383.204 | LP383.204 | LP383.283 | LP383.303 | LP383.316 | LP383.315 | LP383.316 |
| 115105.2  | 487750.3  | 226844.5  | 90640.46  | 64991.31  | 70043.18  | 85618.92  | 92524.01  | 64596.12  | 57530.78  |
| 112366.3  | 445280.9  | 216207.1  | 81589.19  | 70491.51  | 75881.03  | 79576.73  | 132451.9  | 71285.76  | 50171.6   |
| 101940.9  | 382684.4  | 210530.7  | 60067.4   | 63213.19  | 69400.69  | 87518.66  | 145137.5  | 71693.12  | 51878.85  |
| 82624.88  | 425851.3  | 203978.8  | 84920.15  | 64513.62  | 61412.07  | 82301.04  | 151625.4  | 72072.59  | 51694.11  |
| 112718.5  | 513446.4  | 197653.7  | 116692.4  | 64780.46  | 64974.31  | 89236.99  | 149101.5  | 71096.25  | 53098.29  |

|           |           |           |           |           |           |           |           |           |           |
|-----------|-----------|-----------|-----------|-----------|-----------|-----------|-----------|-----------|-----------|
| LP383.316 | LP383.316 | LP383.316 | LP383.316 | LP383.316 | LP383.331 | LP383.331 | LP383.331 | LP383.331 | LP383.352 |
| 56710.04  | 46382.7   | 48009.77  | 52260.21  | 51297.64  | 94783.37  | 104663.2  | 67737.08  | 85454.37  | 56307.36  |
| 48483.71  | 49277.87  | 47319.72  | 60835.29  | 51582.57  | 72400.58  | 96476.56  | 59044.49  | 83086.84  | 52991.86  |
| 48277.48  | 45657.32  | 54619.42  | 49085.28  | 56898.09  | 85338.03  | 107735.8  | 67353.77  | 84724.74  | 51395.79  |
| 51107.3   | 54254.33  | 46000.37  | 50125.54  | 48922.03  | 92538.75  | 106616.6  | 64442.08  | 81830.74  | 50610.99  |
| 48585.05  | 45621.52  | 51923.39  | 51866.93  | 47871.06  | 84990.81  | 100358.1  | 66292.52  | 81814.87  | 48626.06  |

|           |           |           |           |           |           |           |           |           |           |
|-----------|-----------|-----------|-----------|-----------|-----------|-----------|-----------|-----------|-----------|
| LP383.352 | LP383.371 | LP383.399 | LP383.400 | LP383.409 | LP384.207 | LP384.238 | LP384.306 | LP384.320 | LP384.326 |
| 88992.71  | 43203.79  | 1132739   | 45304.78  | 17261.56  | 77911.83  | 19290.48  | 88520.62  | 42719.48  | 21846.12  |
| 81213.88  | 43309.88  | 1086939   | 39126.74  | 22816.61  | 77486.21  | 18983.4   | 94383.85  | 41436.08  | 22528.41  |
| 84607.29  | 44532.99  | 1032994   | 40252.86  | 17854.42  | 93516.88  | 17449.94  | 90054.68  | 40445.94  | 23675.31  |
| 91078.11  | 40494.6   | 1017970   | 43081.1   | 17688.48  | 79204.75  | 19577.98  | 80024.5   | 37123.17  | 23788.26  |
| 116346.5  | 43363.82  | 910329.9  | 35460.4   | 18414.73  | 76243.9   | 17520.6   | 93238.65  | 42001.74  | 23207.21  |

|           |           |           |           |           |           |           |           |           |           |
|-----------|-----------|-----------|-----------|-----------|-----------|-----------|-----------|-----------|-----------|
| LP384.335 | LP384.384 | LP384.383 | LP384.383 | LP384.383 | LP385.183 | LP385.183 | LP385.183 | LP385.183 | LP385.183 |
| 43501.13  | 35852.62  | 64545.79  | 28149.33  | 31789.79  | 183520.8  | 167926.4  | 217740.5  | 240475    | 262949.8  |
| 34354.24  | 36100.87  | 66261.35  | 32422.86  | 36664.51  | 145687.5  | 268881.1  | 265911.8  | 304320.7  | 228252.8  |
| 39600.62  | 42145.15  | 66976.44  | 31097.63  | 33513.45  | 211919    | 242963.6  | 142259.3  | 313393.2  | 212042.7  |
| 34015.95  | 49468.66  | 66364.73  | 32516.15  | 29966.07  | 228553.8  | 252600    | 256469.2  | 210016.2  | 178067.3  |
| 33408.18  | 44221.99  | 61577.87  | 32917.69  | 37995.95  | 299766.9  | 204495.9  | 224135.8  | 293199    | 215102.4  |

|           |           |           |           |           |           |           |           |           |           |
|-----------|-----------|-----------|-----------|-----------|-----------|-----------|-----------|-----------|-----------|
| LP385.183 |
| 210998.8  | 227197.2  | 212407.2  | 215329.9  | 290237.3  | 156561.2  | 275264.9  | 306385.5  | 255946.5  | 258505.6  |
| 193133.8  | 236088    | 187703.4  | 212481.6  | 267959.5  | 243801.2  | 219304.7  | 243035.1  | 208443.2  | 306594.5  |
| 152003.1  | 485785.6  | 144757.2  | 298210.3  | 192115.6  | 219891.6  | 246789.7  | 244938.2  | 222932    | 220311.1  |
| 194576    | 253378.3  | 297979.2  | 230309.3  | 282439.6  | 179478.6  | 204547.5  | 240490.3  | 225206.6  | 264613.6  |
| 173023.5  | 245549.2  | 170941.1  | 186883.6  | 229040    | 183426.8  | 197688.8  | 284497.9  | 223794.6  | 216238.9  |

|           |           |           |           |           |           |           |           |           |           |
|-----------|-----------|-----------|-----------|-----------|-----------|-----------|-----------|-----------|-----------|
| LP385.183 | LP385.183 | LP385.183 | LP385.183 | LP385.183 | LP385.183 | LP385.184 | LP385.183 | LP385.183 | LP385.183 |
| 264138.4  | 161924.5  | 159821.7  | 270705.7  | 239130.4  | 184019.6  | 292467.4  | 308564.7  | 216550    | 335424.3  |
| 206797.6  | 169649    | 204314    | 313948.3  | 230628.5  | 221361.9  | 200236.9  | 322889.5  | 307869.4  | 241998.8  |
| 241021.6  | 195176.4  | 188324.4  | 232556.1  | 240737.4  | 156001.3  | 219920.6  | 280524.7  | 234158.7  | 276715.1  |
| 173830.1  | 214305.8  | 187689    | 256987.2  | 207524.5  | 164121    | 262197.2  | 364960.9  | 231854.2  | 353131.9  |
| 158962.7  | 236867.4  | 184922.8  | 282871.4  | 209341.2  | 226844    | 263841.3  | 297341.3  | 200107.5  | 185075.9  |

|            |            |            |            |            |            |            |            |            |            |
|------------|------------|------------|------------|------------|------------|------------|------------|------------|------------|
| LP385.183' | LP385.183' | LP385.183' | LP385.183' | LP385.184' | LP385.183' | LP385.184' | LP385.183' | LP385.183' | LP385.183' |
| 219173.9   | 224987.1   | 355058.5   | 275854.7   | 180711.5   | 266680     | 329765.8   | 240792     | 277872.9   | 95193.56   |
| 307286     | 184265.8   | 205263     | 230035.1   | 388952.4   | 232256.2   | 219212.3   | 208044.4   | 255141.7   | 102999.1   |
| 329674.5   | 219292.1   | 162782.4   | 212789.1   | 239708.6   | 324616.9   | 304480.4   | 157051.9   | 240311.2   | 108216.9   |
| 208169.9   | 167724.5   | 388080.4   | 214327.1   | 199740.7   | 247079.8   | 264203.8   | 248216.2   | 246063.3   | 91299.97   |
| 219022.6   | 216309.9   | 219324     | 185533.1   | 229780.9   | 237503.3   | 296105.1   | 192032.6   | 212271.1   | 107248.6   |

|            |            |            |            |            |            |            |            |            |            |
|------------|------------|------------|------------|------------|------------|------------|------------|------------|------------|
| LP385.183' |
| 205504.5   | 181760.7   | 164108.5   | 212726.6   | 294333     | 161562.6   | 256785.1   | 261187     | 188114.4   | 188029.6   |
| 221767.3   | 218229.4   | 167202     | 171428.3   | 330470.1   | 188210.9   | 340205.5   | 246809.4   | 159443.5   | 191865.6   |
| 225385.1   | 221182.8   | 188052.8   | 175098.1   | 256441.2   | 141194.4   | 226507.8   | 207369     | 183844.7   | 230335.4   |
| 209054.1   | 198179.7   | 263627.7   | 172282.6   | 234405.3   | 201719.2   | 291726.5   | 214535.8   | 144563.8   | 192415.8   |
| 261832.3   | 190579.9   | 181063.4   | 181556.2   | 221786.3   | 198871.4   | 179172.3   | 184257.8   | 210760.7   | 207310.9   |



|           |           |           |           |           |           |           |           |           |           |
|-----------|-----------|-----------|-----------|-----------|-----------|-----------|-----------|-----------|-----------|
| LP385.183 | LP385.183 | LP385.183 | LP385.183 | LP385.183 | LP385.184 | LP385.184 | LP385.183 | LP385.184 | LP385.183 |
| 178927.2  | 143474.5  | 158757.2  | 245306.9  | 157625    | 254393.9  | 274989.4  | 225811.5  | 202145.3  | 163309.6  |
| 176632.7  | 172977.2  | 183718.5  | 200884.4  | 274005    | 316954.1  | 219734.3  | 300478.4  | 201219.2  | 209580.4  |
| 282622.4  | 152853.4  | 206028.1  | 242559.7  | 167960    | 281618.6  | 268428.5  | 176612.8  | 272366.7  | 257085.7  |
| 251459.1  | 142468.7  | 157658.2  | 259401.5  | 232212    | 330649.9  | 247051.6  | 257012.5  | 247782.7  | 218149.7  |
| 188079.6  | 145469.6  | 156902.7  | 192250.5  | 173506.8  | 259699.4  | 247266.3  | 228315    | 290550.1  | 242561.7  |

|            |           |            |           |            |           |            |           |            |           |
|------------|-----------|------------|-----------|------------|-----------|------------|-----------|------------|-----------|
| LP385.183' | LP385.184 | LP385.183' | LP385.184 | LP385.183' | LP385.183 | LP385.183' | LP385.183 | LP385.183' | LP385.183 |
| 249438.1   | 226264.7  | 173701.5   | 229343    | 165930.3   | 186084.7  | 144680.4   | 150332.5  | 210705.9   | 182884.1  |
| 176125.9   | 184328.1  | 164650.4   | 172454.1  | 121439.3   | 249915.8  | 156676.8   | 115078.3  | 235099     | 149474.6  |
| 175175.5   | 186149.5  | 188968.6   | 166909.3  | 122399.6   | 196717.5  | 164808     | 140210.1  | 227284.5   | 166226    |
| 223448     | 190355.1  | 199822.7   | 151487    | 106401.2   | 217609.7  | 177165.7   | 165153.2  | 187747.9   | 153124.9  |
| 150341     | 194842.2  | 235514.2   | 250026.1  | 109058.7   | 175343    | 170526.5   | 201153.5  | 252215.6   | 162272.8  |

|            |            |            |            |            |            |            |            |            |            |
|------------|------------|------------|------------|------------|------------|------------|------------|------------|------------|
| LP385.183' | LP385.183' | LP385.183' | LP385.183' | LP385.183' | LP385.183' | LP385.184' | LP385.183' | LP385.183' | LP385.183' |
| 205763.8   | 106605.9   | 196909     | 164280     | 73602.39   | 126645     | 71157.28   | 174694.6   | 186566.4   | 86528.45   |
| 224626.4   | 110512.4   | 208673.4   | 186446.2   | 60964.54   | 161651.5   | 77411.3    | 178258.3   | 198541.2   | 86459.17   |
| 229816.6   | 103606.6   | 210620.3   | 151231.6   | 85893.78   | 158884.2   | 70591.77   | 167783.8   | 152104.1   | 87211.17   |
| 208003.9   | 102218.8   | 212058.7   | 163362.9   | 89442.49   | 158994.4   | 70058.28   | 140667.5   | 139196.2   | 72692.09   |
| 195832.3   | 109286.5   | 223537.6   | 177572     | 82791.56   | 186079.3   | 72100.72   | 158695.2   | 174334.5   | 89521.34   |

|           |           |           |           |           |           |           |           |           |           |
|-----------|-----------|-----------|-----------|-----------|-----------|-----------|-----------|-----------|-----------|
| LP385.183 | LP385.183 | LP385.183 | LP385.183 | LP385.183 | LP385.183 | LP385.208 | LP385.221 | LP385.221 | LP385.221 |
| 70620.54  | 114249.9  | 66191.49  | 102660.9  | 87092.59  | 135926.9  | 156992.3  | 75827.65  | 190421.1  | 251954.5  |
| 76851.38  | 117933.4  | 108520.2  | 101769.1  | 90530.23  | 119040.5  | 125962    | 32040.04  | 67855.3   | 258440.8  |
| 70656.8   | 98701.29  | 80968.13  | 74657.32  | 89805.2   | 110021.5  | 139284.6  | 73257.56  | 182581.8  | 254528.3  |
| 73660.93  | 101896.4  | 85675.55  | 78491.07  | 79461.64  | 103885.3  | 136322.8  | 67808.74  | 106532.2  | 244309.9  |
| 74120.46  | 104444.9  | 85198.43  | 76438.46  | 83366.1   | 111345.5  | 143814.3  | 66965.41  | 191546.4  | 255449.7  |

|           |           |           |           |           |           |           |           |           |           |
|-----------|-----------|-----------|-----------|-----------|-----------|-----------|-----------|-----------|-----------|
| LP385.221 | LP385.220 |
| 46353.83  | 64267.3   | 139759.9  | 242082.5  | 213710.4  | 164062.6  | 202359    | 186538.8  | 95612.47  | 56230.31  |
| 24556.37  | 64164.98  | 46784.81  | 237230.7  | 188898.5  | 161823.8  | 210875.7  | 188889.8  | 102871.9  | 168778.1  |
| 43921.25  | 67156.24  | 130995.1  | 247482.6  | 205070.6  | 155683.5  | 195612.9  | 187016.5  | 89703.26  | 144861.2  |
| 37228.4   | 58712.2   | 127488.5  | 106627.4  | 66677.18  | 157319    | 200139    | 176039.8  | 93656.97  | 160972.3  |
| 40655.63  | 64368.48  | 135907.4  | 260996.3  | 215578.9  | 147381.3  | 196334    | 179499.2  | 103423.7  | 158197.5  |

|           |           |           |           |           |           |           |           |           |           |
|-----------|-----------|-----------|-----------|-----------|-----------|-----------|-----------|-----------|-----------|
| LP385.221 |
| 200710.8  | 140480.4  | 56649.36  | 228482.4  | 93629.38  | 187502.6  | 71871.94  | 195007.9  | 75101.87  | 261672    |
| 212619.2  | 57777.33  | 134373.9  | 238119.5  | 93920.56  | 71789.3   | 30806.53  | 185792.4  | 69362.58  | 241201.7  |
| 200767.2  | 146878.5  | 119259    | 245314.9  | 87304.25  | 188639.4  | 64081.12  | 193158.2  | 68833.09  | 262542.5  |
| 220853.3  | 141189.4  | 118393.8  | 255646.2  | 79330.21  | 183830.3  | 53770.82  | 205554.8  | 63430.3   | 241868.1  |
| 199298.4  | 147545.7  | 127563    | 274607.2  | 91181.93  | 182849.2  | 64555.25  | 214328.3  | 65771.36  | 248209.4  |

|           |           |           |           |           |           |           |           |           |           |
|-----------|-----------|-----------|-----------|-----------|-----------|-----------|-----------|-----------|-----------|
| LP385.220 | LP385.221 |
| 164738.7  | 102217.9  | 122575.9  | 195193.5  | 150518.1  | 100582.2  | 117383.3  | 118611.9  | 258556.6  | 192457.7  |
| 157162    | 107749.5  | 129258.9  | 213131.6  | 144487.9  | 106543.7  | 115882.8  | 125928.2  | 246409.5  | 182502.8  |
| 170165.9  | 95386.25  | 119375    | 188806.5  | 157284.5  | 91290.54  | 106719.7  | 95608.65  | 261114.4  | 180301.2  |
| 162854.6  | 99209.79  | 124446.7  | 186770.8  | 150112.5  | 88861.24  | 92947.46  | 98059.64  | 260326.2  | 177918.9  |
| 184477.1  | 101398.7  | 126922.2  | 188297.7  | 144399.8  | 96755.73  | 108575    | 105166.3  | 274916.1  | 194056.2  |

|           |           |           |           |           |           |           |           |           |           |
|-----------|-----------|-----------|-----------|-----------|-----------|-----------|-----------|-----------|-----------|
| LP385.221 |
| 201353.2  | 220191.8  | 159873.8  | 144503.3  | 258329.1  | 201187.3  | 185768.7  | 118641.6  | 107321.1  | 221329.4  |
| 209897.7  | 233757    | 159085.1  | 145607.6  | 250513.3  | 173598.7  | 186291.7  | 129955.2  | 123214.8  | 230578.8  |
| 188709.3  | 229487.7  | 155805    | 147007.8  | 233718.8  | 175365.1  | 188009.6  | 129702.8  | 108393.5  | 201780.4  |
| 201550.2  | 241834.4  | 162094.7  | 144440.5  | 249016.2  | 179628.5  | 182181.7  | 119719.2  | 110019.6  | 217774.7  |
| 206584.7  | 232522    | 167698.8  | 140523.6  | 248130.5  | 179018.8  | 178925.9  | 140647.7  | 102201.4  | 209431.3  |



|           |           |           |           |           |           |           |           |           |           |
|-----------|-----------|-----------|-----------|-----------|-----------|-----------|-----------|-----------|-----------|
| LP385.222 | LP385.221 |
| 158837    | 163854.2  | 160022.7  | 135891.9  | 240897.6  | 164695.7  | 204295.3  | 213878.3  | 80886.32  | 234708    |
| 154777.3  | 200293.2  | 60013.62  | 152188.5  | 235514.3  | 169543.9  | 212435.6  | 195363.9  | 89818.51  | 224998.1  |
| 150913.8  | 180468    | 151983    | 135528.3  | 229815.5  | 156979.6  | 201081.4  | 196877.7  | 84073.59  | 232888.1  |
| 151014.3  | 173130.9  | 139662.1  | 140443.5  | 216764.9  | 172509.4  | 209821.2  | 210673.7  | 79748.37  | 240843.8  |
| 134682.2  | 174843.6  | 153165.2  | 139418.7  | 229256.9  | 182289.8  | 215004.9  | 184997.3  | 87004.82  | 106482    |

|           |           |           |           |           |           |           |           |           |           |
|-----------|-----------|-----------|-----------|-----------|-----------|-----------|-----------|-----------|-----------|
| LP385.221 | LP385.257 | LP385.258 | LP385.350 | LP385.350 | LP385.350 | LP385.350 | LP385.415 | LP385.415 | LP385.415 |
| 171806.4  | 26647.42  | 24439.19  | 17186.17  | 28742.01  | 33716.04  | 30264.53  | 32071.49  | 5355.077  | 23578.71  |
| 169986.6  | 22821.41  | 25276.34  | 25866.73  | 26777.43  | 54956.78  | 30158.71  | 48004.64  | 6859.284  | 28788.73  |
| 165298    | 24184.45  | 16146.91  | 31519.68  | 28200.71  | 56596.57  | 34779.69  | 55386.3   | 6673.967  | 29885.96  |
| 150869.5  | 23987.65  | 17972.41  | 34461.95  | 23158.69  | 60978.79  | 35551.83  | 62265.65  | 9440.574  | 35496.71  |
| 159134.1  | 27412.52  | 25523.05  | 29001.26  | 25015.05  | 48189.54  | 29049.92  | 53106.13  | 11710.99  | 30190.92  |

|           |           |           |           |           |           |           |           |           |           |
|-----------|-----------|-----------|-----------|-----------|-----------|-----------|-----------|-----------|-----------|
| LP385.415 | LP385.414 | LP386.166 | LP386.326 | LP386.363 | LP386.363 | LP386.363 | LP386.363 | LP386.363 | LP386.419 |
| 18256.41  | 17380.78  | 16660.16  | 100170.3  | 26219.22  | 33246.48  | 24815.1   | 26284.64  | 46398.67  | 10200.92  |
| 18441.94  | 21198.69  | 15780.34  | 106338.4  | 27845.71  | 35189.1   | 26598.51  | 21388.56  | 50527.38  | 10500.98  |
| 26673.47  | 20953.15  | 16074.88  | 109831.5  | 23798.87  | 33581.86  | 25123.36  | 20279.16  | 48273.86  | 8994.663  |
| 22004.25  | 19975.72  | 12052.48  | 104634.3  | 26346.36  | 27297     | 24123.5   | 23691.95  | 43534.18  | 9212.873  |
| 28966.01  | 25724.2   | 14623.36  | 103330    | 26157.99  | 32204.2   | 26572.01  | 24067.42  | 48198.52  | 11454.3   |

|           |           |           |           |           |           |           |           |           |           |
|-----------|-----------|-----------|-----------|-----------|-----------|-----------|-----------|-----------|-----------|
| LP387.199 |
| 199606.9  | 106272    | 118834    | 127939.2  | 190797.2  | 160241.7  | 155207.6  | 143364.7  | 151692.9  | 139860.5  |
| 189464.1  | 145793.8  | 160475.5  | 110651.7  | 144159.3  | 165188.5  | 159184.1  | 172463.1  | 217338.4  | 151694.4  |
| 170586    | 145227.3  | 148723.6  | 125280.8  | 155969.3  | 166077.2  | 124991.9  | 164159.1  | 164944.7  | 145125.9  |
| 94611.38  | 102200.9  | 136897.5  | 133423.5  | 241900.9  | 142959.4  | 148629.4  | 150542.5  | 177830.1  | 193857.6  |
| 154905.9  | 160039.9  | 150864.9  | 107834.7  | 106561.6  | 134215.7  | 152161.1  | 193330.2  | 154419.8  | 186067.1  |

|           |           |           |           |           |           |           |           |           |           |
|-----------|-----------|-----------|-----------|-----------|-----------|-----------|-----------|-----------|-----------|
| LP387.199 |
| 133112.3  | 178006.6  | 73849.87  | 183912.7  | 160527.6  | 134191.1  | 123566.5  | 137877.2  | 123638.8  | 70756.2   |
| 136381.6  | 178914.1  | 90122.81  | 142693.1  | 140322.2  | 191178.1  | 197452.9  | 107826.8  | 197553.3  | 70871.71  |
| 102522.4  | 231585.4  | 87357.16  | 98770.89  | 158523    | 149873.8  | 134545.9  | 101688.7  | 114472.2  | 116458.8  |
| 107632.8  | 135809    | 69247.43  | 115672.7  | 170716.8  | 151576.8  | 171878.4  | 109565.1  | 178833.3  | 103777.8  |
| 108951.6  | 226655.7  | 86129.4   | 99909.71  | 178450.2  | 136740.2  | 155902    | 123429    | 141669.2  | 68760.37  |

|           |           |           |           |           |           |           |           |           |           |
|-----------|-----------|-----------|-----------|-----------|-----------|-----------|-----------|-----------|-----------|
| LP387.199 |
| 202245.9  | 184965.7  | 108466.5  | 164279.2  | 120752.5  | 115507.6  | 125840.5  | 121571.7  | 104808.4  | 110164    |
| 189821.7  | 137878.9  | 159691.2  | 162692    | 121928.8  | 127158    | 158183.5  | 113042    | 133950.6  | 130927.3  |
| 167353.1  | 172663.7  | 131901.3  | 160348.7  | 170826.2  | 162356.5  | 115433.3  | 114514.5  | 130577.6  | 107479.2  |
| 141099    | 182355.2  | 129953.9  | 190564.2  | 126672    | 133852.7  | 140132    | 118737    | 121957.2  | 148393.5  |
| 119457    | 166644.4  | 121784.8  | 115351.9  | 177505.7  | 117695.8  | 109045.9  | 130606.5  | 96667.36  | 112998.6  |

|           |           |           |           |           |           |           |           |           |           |
|-----------|-----------|-----------|-----------|-----------|-----------|-----------|-----------|-----------|-----------|
| LP387.199 |
| 191526.6  | 191891    | 164234.5  | 130061.5  | 186364.2  | 191898.9  | 106696.3  | 50844.86  | 134572.9  | 107488.5  |
| 178806.7  | 149150.5  | 189984.5  | 123943.1  | 132335.8  | 173770.7  | 143006.5  | 51452.69  | 135441.9  | 93466.67  |
| 158807.7  | 186448.1  | 188599.7  | 133320.1  | 144053.5  | 121593.4  | 108312.3  | 51753.47  | 141605.2  | 93549.52  |
| 190664.1  | 172421.3  | 181866.4  | 116582.7  | 187616.2  | 128826.2  | 98824.75  | 53034.6   | 112693.4  | 87399.28  |
| 140866.1  | 191879.6  | 242494    | 145366.2  | 156453.8  | 157562.3  | 82923.5   | 55989.3   | 195419.7  | 95772.23  |

|           |           |           |           |           |           |           |           |           |           |
|-----------|-----------|-----------|-----------|-----------|-----------|-----------|-----------|-----------|-----------|
| LP387.199 |
| 110232.3  | 193074.6  | 89646.96  | 156873.7  | 122579    | 136143.1  | 144844.8  | 100295.1  | 138208.5  | 46219.02  |
| 167106.4  | 146476.6  | 96325.53  | 152936.7  | 112471.9  | 130446.1  | 96780.85  | 135900.9  | 138466.8  | 38840.1   |
| 117073.8  | 142074    | 145327.2  | 191745.4  | 88728.8   | 100618.5  | 97929.97  | 89419.91  | 138226.6  | 46857.38  |
| 114653.4  | 170069.4  | 89011.38  | 173864.1  | 117619.2  | 98447.8   | 132159.4  | 109083.9  | 132567.8  | 40653.73  |
| 121935.2  | 146728.7  | 92533.59  | 131561.5  | 158890.4  | 115437.2  | 93211.46  | 135941    | 148545.5  | 44120.23  |



|           |           |           |           |           |           |           |           |           |           |
|-----------|-----------|-----------|-----------|-----------|-----------|-----------|-----------|-----------|-----------|
| LP387.199 |
| 89643.52  | 130661.5  | 145369.5  | 159119.1  | 99926.2   | 46279.7   | 98573.83  | 144258.8  | 110753.2  | 144156.6  |
| 112498.8  | 110353.8  | 213403.7  | 114464.2  | 102775.3  | 41780.85  | 99777.61  | 234877.6  | 140068    | 138244.7  |
| 119407.3  | 160192.4  | 192555.1  | 138432.6  | 105968.5  | 51141.3   | 121668.1  | 175359.7  | 108887.4  | 110752.1  |
| 104909.6  | 153560.8  | 164715.2  | 85504.45  | 102761.4  | 50012.07  | 89235.79  | 147604.1  | 111350.8  | 127126.9  |
| 80067.8   | 172846.2  | 160882    | 104467.9  | 110310.7  | 49494.55  | 80231.15  | 129447.2  | 118998.5  | 140990.5  |

|           |           |           |           |           |           |           |           |           |           |
|-----------|-----------|-----------|-----------|-----------|-----------|-----------|-----------|-----------|-----------|
| LP387.199 |
| 146851.7  | 147787.2  | 158954.4  | 123927.1  | 59969.96  | 129116.5  | 30839.59  | 145231.3  | 134834.9  | 138056.9  |
| 88617.52  | 135649.4  | 143550.4  | 121410    | 62410.84  | 139925.6  | 38145.5   | 143865.4  | 121228.5  | 110562    |
| 96037.63  | 144999.9  | 177505.8  | 99418.61  | 81408.42  | 122821.8  | 43433.96  | 147451.1  | 129831.8  | 177972.2  |
| 101120.6  | 168424.5  | 164817.9  | 77891.96  | 58482.23  | 147896.4  | 47062.14  | 151078.9  | 111219.8  | 129881.1  |
| 96125.52  | 123956.5  | 126831.8  | 94520.37  | 60414.31  | 146377.3  | 30654.53  | 117028.4  | 139275.6  | 136761.6  |

|           |           |           |           |           |           |           |           |           |           |
|-----------|-----------|-----------|-----------|-----------|-----------|-----------|-----------|-----------|-----------|
| LP387.199 |
| 36722.91  | 88833.69  | 161524.6  | 118682    | 146612.5  | 45855.01  | 45871.9   | 44223.82  | 75656.17  | 50427.37  |
| 35934.53  | 106617.7  | 106320.8  | 132821.6  | 111850.5  | 55445.22  | 39725.35  | 36130.73  | 88352.27  | 62010.67  |
| 44107.68  | 102603.3  | 138539.4  | 151092.8  | 102134.9  | 40380.85  | 37043.24  | 39303.92  | 75660.05  | 47153.75  |
| 43990.55  | 95322.51  | 115527.5  | 211288.4  | 124755.9  | 43098.37  | 47571.14  | 20924.83  | 68256.7   | 47146.91  |
| 51240.24  | 73968.44  | 178932.4  | 187721.1  | 113995.2  | 47976.15  | 36468.51  | 34631.17  | 84281.23  | 54272.27  |

|           |           |           |           |           |           |           |           |           |           |
|-----------|-----------|-----------|-----------|-----------|-----------|-----------|-----------|-----------|-----------|
| LP387.199 | LP387.199 | LP387.199 | LP387.199 | LP387.199 | LP387.310 | LP387.330 | LP387.347 | LP388.269 | LP388.269 |
| 48399.67  | 40231.93  | 55544.49  | 50446.55  | 45610.95  | 16422.79  | 19109.78  | 42106.36  | 106082.5  | 106589.2  |
| 50237.37  | 43222.32  | 51802.48  | 52732.72  | 51207.03  | 18242.19  | 18276.38  | 42843.92  | 110816.8  | 103362.1  |
| 59314.8   | 44456.25  | 41799.04  | 35904.59  | 39026.97  | 21930.55  | 15774.65  | 51952.08  | 113397.4  | 95775.65  |
| 40116.81  | 45336.63  | 47341.38  | 31556.4   | 48664.82  | 25985.36  | 18047.9   | 50727.31  | 113277.7  | 90931.04  |
| 60743.81  | 43289.18  | 44132.7   | 33863.15  | 48330.95  | 26127.72  | 13857.73  | 49563.64  | 122672.3  | 104603.9  |

|           |           |           |           |           |           |           |           |           |           |
|-----------|-----------|-----------|-----------|-----------|-----------|-----------|-----------|-----------|-----------|
| LP388.269 |
| 130591.3  | 70404.39  | 100949.9  | 106315.7  | 79562.76  | 89010.17  | 97055.79  | 70510.6   | 62094.91  | 93676.16  |
| 87802.91  | 73505.06  | 101952.8  | 116536.9  | 78631.02  | 70247.8   | 90266.1   | 63770.18  | 63436.74  | 99662.23  |
| 98318.23  | 64159.2   | 101472    | 94255.06  | 81236.48  | 90493.18  | 118276.8  | 71180.82  | 68235.82  | 99580.63  |
| 116309    | 63195.1   | 89989.61  | 88382.28  | 91629.07  | 89358.98  | 100717.6  | 61125.02  | 63674.75  | 99682.6   |
| 122270.9  | 62867.03  | 100338.5  | 101337.5  | 78016.87  | 85771.34  | 91550.69  | 68336.46  | 62757.33  | 107627.9  |

|           |           |           |           |           |           |           |           |           |           |
|-----------|-----------|-----------|-----------|-----------|-----------|-----------|-----------|-----------|-----------|
| LP388.269 | LP388.270 |
| 97126.93  | 100621.5  | 99176.24  | 73597.2   | 72727.27  | 91204.59  | 68298.07  | 79940.46  | 94448.41  | 87348.15  |
| 92017.61  | 98717.41  | 147131.3  | 61604.14  | 71148.52  | 77157.84  | 68659.5   | 97500.68  | 93472.71  | 91950.47  |
| 94356.94  | 106577.5  | 69928.33  | 65258.63  | 79809.65  | 90697.88  | 79491.97  | 84007.7   | 88073.31  | 90980.08  |
| 94326.46  | 95879.67  | 101774.3  | 68256.22  | 73772.27  | 89727.33  | 65840.18  | 71592.96  | 89586.75  | 87432.71  |
| 112976.6  | 99639.88  | 93808.33  | 62962.57  | 70008.91  | 66281.46  | 66235.25  | 75440.39  | 95567.22  | 90565.85  |

|            |           |           |           |            |           |           |           |           |           |
|------------|-----------|-----------|-----------|------------|-----------|-----------|-----------|-----------|-----------|
| LP388.27_! | LP388.269 | LP388.270 | LP388.269 | LP388.27_! | LP388.269 | LP388.269 | LP388.270 | LP388.269 | LP388.269 |
| 81735.89   | 71580.81  | 131710.3  | 109012.1  | 75710.25   | 93676.63  | 77709.04  | 57353.64  | 75645.71  | 59143.79  |
| 83136.28   | 71414.09  | 142480.8  | 109972.8  | 67274.91   | 96870.01  | 80098.71  | 59236.27  | 70244.29  | 72254.33  |
| 81073.5    | 65910.24  | 132852.4  | 107484.3  | 68846.92   | 98098.18  | 68104.29  | 61595.21  | 80064.06  | 64139.35  |
| 77685.36   | 81927.52  | 134037.2  | 100732.3  | 73706.15   | 94006.93  | 73787.64  | 52135     | 71577.29  | 59700.86  |
| 78356.69   | 71202.75  | 144262.4  | 100829.8  | 72730.08   | 91703.55  | 75191.6   | 53805.34  | 74557.56  | 65687.38  |

|           |           |           |           |           |           |           |           |           |           |
|-----------|-----------|-----------|-----------|-----------|-----------|-----------|-----------|-----------|-----------|
| LP388.27_ | LP388.269 | LP388.269 | LP388.269 | LP388.269 | LP388.269 | LP388.27_ | LP388.270 | LP388.269 | LP388.269 |
| 82592.23  | 55662.22  | 76237.49  | 86643.7   | 116146    | 78112.34  | 68809.46  | 69135.33  | 84735.05  | 79872.53  |
| 73121.52  | 60053.8   | 65255.33  | 78020.17  | 108093.8  | 69478.72  | 67470.11  | 65191.87  | 88761.31  | 79949.77  |
| 75721.63  | 67444.57  | 67575.05  | 79395     | 113707    | 79612.81  | 64003.99  | 65092.52  | 93143.56  | 78062.91  |
| 74338.58  | 61094.7   | 72896.98  | 79030.96  | 108197.5  | 72405.54  | 64592.44  | 77640.9   | 89648.36  | 82243.61  |
| 76053.85  | 59736.55  | 77605.16  | 78721.27  | 110263.2  | 73935.54  | 75735.79  | 64959.88  | 90478.53  | 81673.31  |



|           |           |           |           |          |           |           |           |           |           |
|-----------|-----------|-----------|-----------|----------|-----------|-----------|-----------|-----------|-----------|
| LP388.269 | LP388.269 | LP388.269 | LP388.270 | LP388.27 | LP388.269 | LP388.269 | LP388.270 | LP388.269 | LP388.270 |
| 57160.34  | 79566.58  | 78094.05  | 68599.09  | 79675.37 | 78121.43  | 71787.08  | 79572.85  | 67493.86  | 99060.59  |
| 56820.93  | 78183.18  | 84399.82  | 65239.35  | 78077.18 | 80206.02  | 73050.23  | 83916.2   | 68750.11  | 100474.5  |
| 50797.2   | 83881.85  | 87973.02  | 80981.12  | 79661.32 | 84339.64  | 77296.66  | 87013.44  | 70556.54  | 104738.8  |
| 55913.75  | 90483.84  | 78586.68  | 65452.8   | 84274.83 | 84117.85  | 72352.89  | 81328.15  | 70052.39  | 102177.6  |
| 51481.11  | 72917.61  | 74990.57  | 67797.74  | 80131.07 | 85998.07  | 70187.39  | 79608.69  | 75380.76  | 96575.54  |

|           |           |           |           |           |           |           |           |           |           |
|-----------|-----------|-----------|-----------|-----------|-----------|-----------|-----------|-----------|-----------|
| LP388.269 | LP388.27_ | LP388.269 | LP388.269 | LP388.306 | LP388.306 | LP388.306 | LP388.305 | LP388.305 | LP388.306 |
| 82085.81  | 70856.98  | 66926.53  | 67498.11  | 82120.37  | 89863.32  | 61419.72  | 86040.88  | 113221.4  | 104072.4  |
| 83850.68  | 69799.14  | 71607.21  | 81454.28  | 82315.26  | 84139.15  | 61871.83  | 85478.97  | 106295.3  | 99852.33  |
| 83825.72  | 70799.4   | 73330.19  | 77751.85  | 76130.04  | 83475.9   | 64021.48  | 87491.43  | 116192.2  | 101218    |
| 83415.87  | 70908.84  | 71916.07  | 65111.27  | 84853.91  | 86127.33  | 60667.39  | 82722.32  | 118104.4  | 100759.1  |
| 79632.31  | 65495.3   | 63847.83  | 72940.62  | 77999.25  | 83177.27  | 60733.5   | 84636.88  | 114668.3  | 107941.2  |

|           |           |           |           |           |           |           |           |           |           |
|-----------|-----------|-----------|-----------|-----------|-----------|-----------|-----------|-----------|-----------|
| LP388.306 | LP388.305 | LP388.342 | LP388.342 | LP388.342 | LP388.342 | LP388.342 | LP388.355 | LP388.379 | LP388.378 |
| 126989.5  | 144594.8  | 161242.6  | 123908.8  | 93834.74  | 86802.41  | 88368.61  | 34588.55  | 39295.86  | 18473.43  |
| 119664.4  | 140526.1  | 160959.2  | 112781.6  | 95738.39  | 78330.24  | 74135.47  | 32904.95  | 39786.52  | 17462.78  |
| 120229.5  | 128415.4  | 162117.2  | 118927.8  | 94852.22  | 75975.04  | 82591.57  | 30826.09  | 37646.22  | 12843.56  |
| 123304.1  | 138374.6  | 160638.8  | 119266.9  | 88610.41  | 77749.58  | 86777.03  | 29023.54  | 41347.46  | 12004.49  |
| 128164.7  | 143362.7  | 158402.6  | 126408.8  | 91671.29  | 85493.6   | 88218.06  | 20169.39  | 36620.29  | 11706.67  |

|           |           |           |           |           |           |           |           |           |           |
|-----------|-----------|-----------|-----------|-----------|-----------|-----------|-----------|-----------|-----------|
| LP389.112 | LP389.112 | LP389.179 | LP389.179 | LP389.179 | LP389.179 | LP389.216 | LP389.216 | LP389.216 | LP389.216 |
| 24394.72  | 12464.59  | 52841.63  | 35753.27  | 51289.74  | 26243.56  | 35827.73  | 50888.5   | 40774.1   | 35990.99  |
| 35319.56  | 18458.35  | 46567.26  | 35744.29  | 48765.41  | 33425.78  | 35119.39  | 55074.63  | 42517.86  | 39479.51  |
| 45841.1   | 21859.34  | 45598.13  | 34044.76  | 53420.17  | 32448.7   | 37376.31  | 51228.8   | 37561.55  | 38473.26  |
| 68592.85  | 35460.12  | 44762.29  | 36061.49  | 51173.52  | 33464.74  | 36214.92  | 57349.25  | 43576.84  | 38757.47  |
| 71358.62  | 30652.96  | 42898.68  | 38081.56  | 45103.38  | 32744.92  | 35077.05  | 51112.66  | 36934.13  | 40069.28  |

|           |           |           |           |           |           |           |           |           |           |
|-----------|-----------|-----------|-----------|-----------|-----------|-----------|-----------|-----------|-----------|
| LP389.301 | LP389.342 | LP389.346 | LP390.212 |
| 28866.19  | 16076.65  | 24701.88  | 40383.01  | 54738.12  | 51692.9   | 57585.61  | 56453.56  | 50243.63  | 56643.98  |
| 22894.48  | 13032.45  | 27394.18  | 42467.62  | 70242.74  | 43341.23  | 58321.3   | 40405.94  | 41975.31  | 40451.51  |
| 24941.21  | 14998.67  | 27377.56  | 60389.01  | 80248.93  | 64545.88  | 85924.27  | 76854.59  | 68772.63  | 73494.35  |
| 24239.47  | 13049.35  | 25207.39  | 55154.73  | 79731.12  | 64835.36  | 79331.92  | 65604.63  | 52805.98  | 78267.62  |
| 22324.74  | 13406.5   | 27094.34  | 60405.53  | 86648.15  | 69222.22  | 90696.4   | 67739.77  | 70116.97  | 70814.45  |

|           |           |           |           |           |           |           |           |           |           |
|-----------|-----------|-----------|-----------|-----------|-----------|-----------|-----------|-----------|-----------|
| LP390.212 |
| 49567.76  | 59566.9   | 47322.46  | 74458.23  | 87684.42  | 73340.08  | 40200.32  | 103513.4  | 81241.87  | 89852.28  |
| 62280.96  | 50640.01  | 49139.58  | 52423.88  | 52279.59  | 41376.26  | 64073.63  | 61043.52  | 46345.21  | 55875.82  |
| 89225.63  | 85734.4   | 66978.77  | 79183.05  | 92887.97  | 67634.52  | 57553.36  | 102078.6  | 68371.13  | 96961.11  |
| 80021.76  | 78672.53  | 68419.87  | 77770.28  | 86151.57  | 66490.32  | 51475.3   | 105864.1  | 70925.43  | 82466.42  |
| 98789.43  | 78554.88  | 73064.92  | 72477.61  | 83950.52  | 65347.9   | 59225.6   | 106049.6  | 65732.99  | 95275.21  |

|           |           |           |           |           |           |           |           |           |           |
|-----------|-----------|-----------|-----------|-----------|-----------|-----------|-----------|-----------|-----------|
| LP390.212 | LP390.249 | LP390.248 |
| 94312.41  | 38035.86  | 52134.84  | 49007.76  | 52728.3   | 61957.94  | 44510.6   | 73949.08  | 77571.39  | 92423.66  |
| 60115.97  | 61415.76  | 45591.48  | 58974.28  | 67234.1   | 102030.1  | 49708.09  | 49491.48  | 85092.7   | 84010.21  |
| 93302.15  | 74500.4   | 66939.8   | 92917.7   | 85854.17  | 82336.01  | 72551.7   | 62720.68  | 78975.33  | 94221.71  |
| 97108.7   | 71012.15  | 66013.91  | 76056.47  | 82954.02  | 85655.35  | 72965.42  | 67314.06  | 74293.11  | 93239.51  |
| 99955.77  | 78512.59  | 62968.65  | 91863.98  | 89827.67  | 83760.16  | 73184.22  | 72618.9   | 74123.32  | 80499.16  |

|           |           |           |           |           |           |           |           |           |           |
|-----------|-----------|-----------|-----------|-----------|-----------|-----------|-----------|-----------|-----------|
| LP390.248 | LP390.249 | LP390.248 | LP390.249 |
| 93662.68  | 94222.04  | 98704.78  | 74978.48  | 81442.94  | 84688.3   | 120317.6  | 72424.51  | 64623.65  | 83680.16  |
| 94336.41  | 82876.12  | 96972.35  | 77036.4   | 83179.07  | 82658.27  | 122811.6  | 62578.81  | 69039.17  | 111588.1  |
| 102902.1  | 88576.99  | 98901.14  | 72192.13  | 83577.5   | 75619.84  | 119691.7  | 62854.91  | 63863.57  | 75922.49  |
| 142228.5  | 82782.46  | 88378.13  | 84386.59  | 83391.25  | 60330.39  | 127674.9  | 59191.77  | 64766.95  | 88641.45  |
| 62719.23  | 88441.73  | 87280.26  | 60787.84  | 81224.53  | 82024.87  | 128237.6  | 68428.08  | 60651.94  | 79298.68  |



|           |           |           |           |           |           |           |           |           |           |
|-----------|-----------|-----------|-----------|-----------|-----------|-----------|-----------|-----------|-----------|
| LP390.249 | LP390.248 | LP390.249 | LP390.249 | LP390.249 | LP390.249 | LP390.249 | LP390.249 | LP390.248 | LP390.249 |
| 87224.41  | 73062.9   | 93901.93  | 76462.62  | 49851.71  | 79799.54  | 100225.8  | 72113.98  | 112608    | 76667.81  |
| 89359.7   | 80509.76  | 95846.38  | 87418.29  | 51147.76  | 74278.16  | 84340.08  | 77623.21  | 97362.41  | 79858.51  |
| 81705.43  | 73689.49  | 96700.69  | 88953.87  | 49719.45  | 78954.41  | 90031.95  | 74556.86  | 99327.11  | 77758.35  |
| 80162.61  | 87415.95  | 102657.9  | 88407.49  | 86878.24  | 81063.21  | 89611.43  | 75641.86  | 109146    | 70103.94  |
| 122743.2  | 65778.34  | 95583.7   | 80592.33  | 50608.94  | 79598.98  | 100492    | 70852.32  | 116446.7  | 71193.53  |

|           |           |           |           |           |           |           |           |           |           |
|-----------|-----------|-----------|-----------|-----------|-----------|-----------|-----------|-----------|-----------|
| LP390.249 | LP390.248 | LP390.249 | LP390.248 | LP390.249 | LP390.249 | LP390.249 | LP390.249 | LP390.249 | LP390.249 |
| 71799.22  | 106919.9  | 83924.29  | 55083.14  | 92045.3   | 78551.73  | 64961.36  | 89624.86  | 73412.96  | 133733.4  |
| 68582.48  | 92860     | 89567.62  | 50442.86  | 88364.01  | 75635.87  | 66940.6   | 87330.91  | 85841.72  | 126084.5  |
| 72580.09  | 86110.6   | 88370.43  | 49635.75  | 99399.13  | 83548.95  | 67608.58  | 88162.93  | 72795.81  | 133857.1  |
| 67033.03  | 90986.43  | 84876.39  | 47993.37  | 111355.1  | 80120.14  | 65315.37  | 93612.98  | 71281.96  | 138964.7  |
| 73897.51  | 85936.54  | 83855.81  | 45378.82  | 85074.69  | 76040.22  | 72407.24  | 86828.75  | 78857.81  | 119727.5  |

|           |           |           |           |           |           |           |           |           |           |
|-----------|-----------|-----------|-----------|-----------|-----------|-----------|-----------|-----------|-----------|
| LP390.249 | LP390.248 | LP390.249 | LP390.248 | LP390.249 | LP390.249 | LP390.249 | LP390.249 | LP390.249 | LP390.249 |
| 84155.68  | 94280.99  | 75415.37  | 60609.2   | 97244.98  | 65165.78  | 94358.28  | 129744.6  | 78388.59  | 70023.85  |
| 77158.78  | 83210.35  | 74081.27  | 76287.91  | 96567.67  | 65278.67  | 119682.5  | 123711    | 78050.72  | 74753.54  |
| 68364.15  | 88599.74  | 72425.94  | 70237.02  | 94830.05  | 70802.82  | 97912.15  | 124471.5  | 86751.26  | 73926.83  |
| 70464.49  | 87041.46  | 68278.17  | 69621.19  | 90105.9   | 64377.93  | 93607.31  | 127158    | 81834.08  | 77278.91  |
| 69630.02  | 71772.93  | 65730.56  | 75711.97  | 117647.4  | 62104     | 93528.45  | 116820.8  | 71601.22  | 76819.98  |

|           |           |           |           |           |           |           |           |           |           |
|-----------|-----------|-----------|-----------|-----------|-----------|-----------|-----------|-----------|-----------|
| LP390.249 | LP390.249 | LP390.249 | LP390.249 | LP390.285 | LP390.285 | LP390.285 | LP390.285 | LP390.285 | LP390.285 |
| 72445.44  | 66862.41  | 98219.78  | 91729.29  | 156530    | 137537.8  | 114226.5  | 143538.5  | 144353.4  | 131371.1  |
| 83087.68  | 58288.91  | 91319.81  | 88491.98  | 146372.4  | 128150.4  | 104148.5  | 141873    | 114439.8  | 118662.2  |
| 81811.23  | 60054.02  | 95727.24  | 95633.67  | 179556.8  | 148411.9  | 111334.6  | 137155.9  | 129046.4  | 173728.3  |
| 69362.38  | 54044.15  | 82724.87  | 90369.3   | 165469    | 124884.3  | 146708.7  | 171256    | 153019.5  | 133095.9  |
| 72098.45  | 61267.3   | 88615.76  | 88870.39  | 177174.2  | 117486    | 123073.2  | 136787.9  | 160341    | 112766.8  |

|           |           |           |           |           |           |           |           |           |           |
|-----------|-----------|-----------|-----------|-----------|-----------|-----------|-----------|-----------|-----------|
| LP390.285 |
| 107103.3  | 166741.5  | 121386.5  | 136996.7  | 119652.1  | 118120    | 91037.87  | 122386.2  | 118620.3  | 135043.9  |
| 103020.9  | 173200.1  | 115923.4  | 205532.8  | 124269.9  | 118380.5  | 90901.66  | 123011.4  | 111442.7  | 129144.3  |
| 102373.1  | 173934.4  | 130333.6  | 112161.6  | 159959.7  | 123670.4  | 92710.91  | 129055.1  | 124398.2  | 144023.5  |
| 109926.4  | 178154.2  | 143733.7  | 142925.7  | 137310.3  | 123687.9  | 90713.53  | 123340.7  | 120997.1  | 130152.1  |
| 155457.5  | 166754.3  | 119509.7  | 151452.7  | 104661.3  | 132182.9  | 158556.5  | 124610.1  | 116097.9  | 178273.8  |

|           |           |           |           |           |           |           |           |           |           |
|-----------|-----------|-----------|-----------|-----------|-----------|-----------|-----------|-----------|-----------|
| LP390.285 | LP390.285 | LP390.285 | LP390.285 | LP390.286 | LP390.285 | LP390.285 | LP390.285 | LP390.285 | LP390.285 |
| 150741    | 121366.2  | 136111.8  | 94760.97  | 155535.4  | 131364    | 91583.14  | 147760.4  | 126380.4  | 124282.6  |
| 116362.8  | 127895.7  | 117878.4  | 103703    | 131385.3  | 135845.6  | 95194.61  | 150490.9  | 114390.4  | 117794.4  |
| 133368.5  | 117555.6  | 128364.4  | 113253    | 139379.9  | 122126.5  | 93559.19  | 154250    | 99466.57  | 115850.2  |
| 113825.5  | 122035    | 121303    | 96786.37  | 138490.3  | 140768    | 108685.2  | 142701.1  | 126088.3  | 103801.7  |
| 113720.5  | 113538.8  | 112226.5  | 97919.09  | 139271.6  | 136607.6  | 100877.1  | 142881.5  | 135757.1  | 103765.2  |

|           |           |           |           |           |           |           |           |           |           |
|-----------|-----------|-----------|-----------|-----------|-----------|-----------|-----------|-----------|-----------|
| LP390.285 |
| 103869.7  | 134987.6  | 92662.49  | 115206.7  | 130580.5  | 130766.4  | 115455.5  | 125120.3  | 102391.6  | 113561    |
| 108667.4  | 129627.6  | 88276.85  | 109565.5  | 121889.7  | 124192.7  | 97073.89  | 128134.9  | 105238.6  | 118574    |
| 104702.7  | 101815.3  | 82144.13  | 113271    | 127450.2  | 135176.8  | 127398.2  | 117243.1  | 111264.9  | 116656.6  |
| 107768.1  | 126327.2  | 86657.88  | 114280.4  | 132978.1  | 135448.3  | 103308.7  | 135728.6  | 104320.2  | 112774    |
| 104945.7  | 117817.7  | 92567.93  | 107207.9  | 125877.9  | 139500.9  | 98688.22  | 123672.8  | 97983.34  | 112835    |

|           |           |           |           |           |           |           |           |           |           |
|-----------|-----------|-----------|-----------|-----------|-----------|-----------|-----------|-----------|-----------|
| LP390.285 |
| 97406.59  | 111584.9  | 114666.9  | 103797.7  | 103223.8  | 149310.5  | 71512.92  | 120177    | 117117.7  | 93999.58  |
| 85088.8   | 120378    | 116528.5  | 114932.3  | 118560.2  | 129868.8  | 74402.04  | 113756.3  | 102411.2  | 97542.07  |
| 90654.36  | 108968.5  | 114055.7  | 117200.3  | 118204.2  | 135048.1  | 77775.3   | 84304.95  | 100945.2  | 104842.7  |
| 86482.27  | 105432.6  | 112129.8  | 114619.1  | 122715    | 134487.8  | 66298.87  | 121564.3  | 102608.7  | 86647.18  |
| 88006.77  | 115786.9  | 116925.3  | 111082.4  | 118446    | 129813.1  | 72522.19  | 125641.5  | 92693.71  | 99715.23  |



|           |           |           |           |           |           |           |           |           |           |
|-----------|-----------|-----------|-----------|-----------|-----------|-----------|-----------|-----------|-----------|
| LP390.285 | LP390.285 | LP390.285 | LP390.286 | LP390.285 | LP390.285 | LP390.285 | LP390.286 | LP390.321 | LP390.321 |
| 90052.87  | 112673    | 102611.7  | 101137.1  | 86966.85  | 113896.6  | 164678.7  | 94919.1   | 74709.23  | 155583.7  |
| 103720    | 87216.87  | 95703.13  | 95449.05  | 86023.11  | 106738.2  | 162588.1  | 88152.3   | 133784.4  | 150619.1  |
| 117505.1  | 118910.7  | 118134.9  | 91977.06  | 83742.07  | 103878.6  | 171290.9  | 89958.7   | 134306.3  | 153385.7  |
| 101335.1  | 100516.2  | 94083.84  | 93348.2   | 88758.2   | 111363.1  | 178346.7  | 104492.3  | 119234.4  | 153771.2  |
| 95922.48  | 108047.8  | 101856.5  | 99131.22  | 92380.64  | 105358.3  | 167496.7  | 83612.18  | 115195    | 144048.2  |

|           |           |           |           |           |           |           |           |           |           |
|-----------|-----------|-----------|-----------|-----------|-----------|-----------|-----------|-----------|-----------|
| LP390.322 | LP390.322 | LP390.322 | LP390.322 | LP390.371 | LP391.214 | LP392.216 | LP392.228 | LP392.228 | LP392.228 |
| 163487.2  | 116080.8  | 105435.4  | 164757.4  | 16997.91  | 229911.3  | 42690.13  | 156613.7  | 117036.6  | 77989.53  |
| 144544.3  | 118197.8  | 91142.9   | 159002.7  | 17848.89  | 233165.3  | 56805.38  | 164201.7  | 110421.6  | 85579.24  |
| 148485.5  | 105781.9  | 81788.96  | 149520.8  | 28257.21  | 238202    | 56666.46  | 161307.3  | 120848.7  | 89285.69  |
| 147750.9  | 105771.7  | 91347.83  | 155885    | 36102.58  | 179221.1  | 59696.98  | 159438.4  | 107572.1  | 82636.87  |
| 140907.2  | 122517.5  | 94245.77  | 148628    | 39901.13  | 194608.9  | 67191.87  | 157179.7  | 113497.1  | 89158.73  |

|           |           |           |           |           |           |           |           |           |           |
|-----------|-----------|-----------|-----------|-----------|-----------|-----------|-----------|-----------|-----------|
| LP392.227 | LP392.228 | LP392.228 | LP392.228 | LP392.228 | LP392.229 | LP392.228 | LP392.228 | LP392.229 | LP392.265 |
| 62611.71  | 112805.7  | 116251.7  | 130908.9  | 115774.2  | 80311.4   | 92504.94  | 79307.51  | 138221.4  | 1038470   |
| 68860.21  | 120458.2  | 107473.3  | 131935.1  | 106017.9  | 82753.56  | 95816     | 77701.57  | 146543    | 982656.4  |
| 71906.53  | 117088.5  | 114442.2  | 122080.9  | 118036.4  | 83863.42  | 93647.7   | 77895.72  | 141658.2  | 987574.8  |
| 72135.18  | 120338.4  | 120575.7  | 125440.4  | 120471    | 81968.92  | 96027.75  | 81032.11  | 162578.3  | 921293.5  |
| 58507.27  | 122633.2  | 115131.2  | 127288.5  | 136052.2  | 80365.03  | 92839.99  | 75165.87  | 135073.8  | 987124    |

|           |           |           |           |           |           |           |           |           |           |
|-----------|-----------|-----------|-----------|-----------|-----------|-----------|-----------|-----------|-----------|
| LP392.264 | LP392.264 | LP392.265 | LP392.265 | LP392.264 | LP392.264 | LP392.264 | LP392.312 | LP392.313 | LP393.219 |
| 1424353   | 1546971   | 1126613   | 2516118   | 2176156   | 2073925   | 1347180   | 1899811   | 1817217   | 597464.7  |
| 1314934   | 1463535   | 1060001   | 2652584   | 2168084   | 2032617   | 1279474   | 1805989   | 1684159   | 552721.3  |
| 1155591   | 1368004   | 1025978   | 2364741   | 2075441   | 1967427   | 1187295   | 1782769   | 1660869   | 771254.7  |
| 1144586   | 1352099   | 1081108   | 2259619   | 2066490   | 1992043   | 1290347   | 1967917   | 1790032   | 698370.2  |
| 1357336   | 1585169   | 1222462   | 2377892   | 2237057   | 2179186   | 1450591   | 2268953   | 2007745   | 537631.7  |

|           |           |           |           |           |           |           |           |           |           |
|-----------|-----------|-----------|-----------|-----------|-----------|-----------|-----------|-----------|-----------|
| LP393.317 | LP393.333 | LP393.372 | LP393.372 | LP393.372 | LP393.372 | LP393.372 | LP394.207 | LP394.207 | LP394.207 |
| 286659.6  | 136207.3  | 51475.16  | 31283.33  | 43878.68  | 40743.33  | 51546.29  | 113551.9  | 105544.8  | 88984.8   |
| 271296.7  | 132368.6  | 49664.95  | 31846.83  | 40936.74  | 37438.13  | 46221.24  | 94500.94  | 108576.6  | 74703.58  |
| 264142.8  | 129272    | 48647.77  | 30163.07  | 38666.73  | 40408.38  | 48182.81  | 109108.7  | 111458.4  | 89562.7   |
| 284574.8  | 113845.2  | 49761.66  | 36098.13  | 39797.05  | 34333.72  | 47433.47  | 102564.8  | 115742.4  | 84291.34  |
| 315690.8  | 111161.8  | 48520.81  | 32000.45  | 45146.8   | 41159.04  | 47207.82  | 113716.4  | 118547.8  | 84580.68  |

|           |           |           |           |           |           |           |           |           |           |
|-----------|-----------|-----------|-----------|-----------|-----------|-----------|-----------|-----------|-----------|
| LP394.222 | LP394.243 | LP394.243 | LP394.243 | LP394.243 | LP394.243 | LP394.244 | LP394.243 | LP394.243 | LP394.244 |
| 143631.2  | 181542.5  | 84047.32  | 89133.98  | 117922.1  | 70489.29  | 143551.3  | 77488.95  | 78653.95  | 89567     |
| 126057    | 158183.7  | 77621.24  | 103352.6  | 94145.65  | 78771.03  | 128844    | 80462.33  | 73055.98  | 81107.16  |
| 188915.6  | 154502.8  | 78802.52  | 89820.03  | 94395.03  | 76684.6   | 138837.7  | 79314.31  | 80581.45  | 80739.81  |
| 156965.2  | 145023.6  | 86060.34  | 77551.66  | 94277.29  | 68774.92  | 128483.5  | 80211.46  | 85954.6   | 87701.22  |
| 126747.9  | 196373.6  | 69429.94  | 87645.92  | 96213.42  | 70081.87  | 135900.8  | 69551.9   | 79416.24  | 85188.7   |

|           |           |           |           |           |           |           |           |           |           |
|-----------|-----------|-----------|-----------|-----------|-----------|-----------|-----------|-----------|-----------|
| LP394.243 | LP394.244 | LP394.244 | LP394.243 | LP394.243 | LP394.243 | LP394.244 | LP394.244 | LP394.244 | LP394.243 |
| 104001.5  | 114688.6  | 127635.5  | 85159.83  | 102135.3  | 96501.39  | 121488.7  | 126204.1  | 66904.56  | 93556.72  |
| 82564.51  | 119452.7  | 123065    | 66080.15  | 61540.34  | 97982.07  | 115813.1  | 95729.7   | 63734.28  | 98229.11  |
| 75598.19  | 106631.3  | 121665.1  | 65200.1   | 63425.62  | 100079.9  | 124632.7  | 105026.7  | 63253.01  | 96328.08  |
| 69501.48  | 114102.1  | 123769    | 68859.95  | 64097.73  | 97773.97  | 121086.2  | 97578.81  | 110908.6  | 111504.4  |
| 69095.48  | 117104.7  | 126254.8  | 71275.49  | 66561.89  | 105218.8  | 128617.1  | 103513.5  | 52154.75  | 99031.49  |

|           |           |           |           |           |           |           |           |           |           |
|-----------|-----------|-----------|-----------|-----------|-----------|-----------|-----------|-----------|-----------|
| LP394.243 | LP394.244 | LP394.244 | LP394.243 | LP394.244 | LP394.243 | LP394.243 | LP394.244 | LP394.243 | LP394.243 |
| 161579.1  | 95386.64  | 97338.48  | 73157.4   | 102154.7  | 75798.23  | 103066.9  | 91721.66  | 70690.49  | 101749.3  |
| 155252.1  | 79517.46  | 97426.02  | 58485.07  | 101024.4  | 76429.51  | 96442.07  | 93160.69  | 80306.46  | 99587.85  |
| 177046.1  | 76033.78  | 96838.28  | 59349.02  | 98766.18  | 69555.52  | 89812.88  | 96565.78  | 71503.15  | 103106.7  |
| 172146.1  | 72439.49  | 94914.05  | 60761.51  | 97652.33  | 73755.48  | 91480.35  | 94612.35  | 74704.63  | 97573.17  |
| 136693.8  | 72496.45  | 90662.64  | 53939.37  | 99013.67  | 71471.09  | 87957.61  | 100964.4  | 74593.31  | 98777.49  |



|           |           |           |           |           |           |           |           |           |           |
|-----------|-----------|-----------|-----------|-----------|-----------|-----------|-----------|-----------|-----------|
| LP394.243 | LP394.243 | LP394.243 | LP394.244 | LP394.243 | LP394.243 | LP394.244 | LP394.244 | LP394.244 | LP394.243 |
| 108314.7  | 87052.26  | 90902.19  | 56356.27  | 80138.88  | 78108.3   | 56621.1   | 87173.73  | 70043.43  | 84491.37  |
| 110183.6  | 90417.24  | 92056.08  | 58617.96  | 88202.63  | 96108.99  | 55929.71  | 87526.61  | 67097.32  | 83780.25  |
| 105144.3  | 94091.89  | 90692.08  | 57592.45  | 84466.06  | 93279.37  | 59071.95  | 90291.61  | 79425.07  | 90779.09  |
| 104812.8  | 92866.09  | 86792.94  | 63931.47  | 78469.91  | 85904.5   | 56314.35  | 105438.4  | 69539.98  | 82840.24  |
| 106581.9  | 92213.31  | 86346.28  | 56792.34  | 81135.78  | 88153.58  | 60056.56  | 87047.71  | 70808.03  | 85350.43  |

|           |           |           |           |           |           |           |           |           |           |
|-----------|-----------|-----------|-----------|-----------|-----------|-----------|-----------|-----------|-----------|
| LP394.243 | LP394.244 | LP394.244 | LP394.244 | LP394.244 | LP394.243 | LP394.244 | LP394.243 | LP394.243 | LP394.244 |
| 73379.21  | 82624.57  | 52333.71  | 52267.86  | 57322.02  | 135032.9  | 61920.8   | 72646.71  | 77028     | 78716.91  |
| 74510.13  | 86876.86  | 57617.91  | 56770.4   | 56745.9   | 115140.5  | 55507.39  | 72423.56  | 76428.47  | 72712.79  |
| 76132.63  | 80721.07  | 55375.56  | 54067.65  | 54884.97  | 125822.1  | 58813.28  | 76297     | 79862.84  | 73316.31  |
| 78544.04  | 76867.83  | 54591.31  | 56030.08  | 62185.76  | 127967.1  | 57554.46  | 73583.45  | 85893.9   | 71958.5   |
| 72029.59  | 76678.57  | 54549.47  | 56182.9   | 59196.36  | 128141    | 49586.12  | 66801.97  | 80863.44  | 72425.06  |

|           |           |           |           |           |           |           |           |           |           |
|-----------|-----------|-----------|-----------|-----------|-----------|-----------|-----------|-----------|-----------|
| LP394.244 | LP394.244 | LP394.244 | LP394.243 | LP394.244 | LP394.279 | LP394.279 | LP394.279 | LP394.28_ | LP394.279 |
| 78605.83  | 97713.1   | 107392.9  | 91595.4   | 72319.36  | 117825    | 94127.66  | 105880.3  | 152958.7  | 81495.16  |
| 73793.22  | 105261.3  | 100683.3  | 95762     | 70326.02  | 119781    | 93049.19  | 115190.6  | 192421.9  | 92471.39  |
| 72599.99  | 108297.3  | 98478.2   | 84988.21  | 77458.26  | 123645.4  | 104851.2  | 98680.65  | 144815.7  | 74383.84  |
| 73182.92  | 103712.3  | 106996.3  | 92196.64  | 73487.5   | 117018.5  | 83722.66  | 97759.58  | 128691.3  | 101243.3  |
| 68858.55  | 106305.9  | 96326.3   | 94597.45  | 68026.99  | 101590.7  | 72053.89  | 113179.2  | 148710.3  | 63904.47  |

|           |           |           |           |           |           |           |           |           |           |
|-----------|-----------|-----------|-----------|-----------|-----------|-----------|-----------|-----------|-----------|
| LP394.279 | LP394.279 | LP394.280 | LP394.279 | LP394.279 | LP394.279 | LP394.279 | LP394.28_ | LP394.28_ | LP394.279 |
| 136676.8  | 204055    | 160270    | 118585.6  | 92055.54  | 94520.54  | 112096    | 62143.04  | 85169.13  | 96607.11  |
| 129530.5  | 128748.1  | 135232.9  | 112307.9  | 91568.92  | 70486.69  | 69213.62  | 56598.14  | 87137.56  | 90500.62  |
| 136878.9  | 120435.5  | 139364    | 115441.5  | 105687.3  | 84051.66  | 116628.3  | 60716.96  | 88430.34  | 87304.96  |
| 132979.3  | 119846.9  | 131953.6  | 160788.2  | 88023.37  | 95374.07  | 113258.8  | 92480.72  | 89549.06  | 88040.36  |
| 103598.6  | 128773.9  | 141030.9  | 108556.2  | 82964.75  | 89846.49  | 115054.7  | 59867.58  | 89637.32  | 90473.76  |

|           |           |           |           |           |           |           |           |          |           |
|-----------|-----------|-----------|-----------|-----------|-----------|-----------|-----------|----------|-----------|
| LP394.279 | LP394.279 | LP394.279 | LP394.279 | LP394.280 | LP394.279 | LP394.279 | LP394.279 | LP394.28 | LP394.279 |
| 73199.17  | 91711.2   | 80247.81  | 97387.69  | 89060.54  | 139741.5  | 82426.21  | 99303.33  | 89833.4  | 96337.13  |
| 78350.66  | 89970.1   | 77478.67  | 76641.6   | 109633.4  | 119634.2  | 90471.73  | 107805.8  | 88964.65 | 104978.4  |
| 70635.91  | 84809.11  | 77456.62  | 101590.3  | 93941.6   | 118694.3  | 85186.97  | 97407.92  | 79627.08 | 92343.07  |
| 75207.16  | 80800.16  | 76480.36  | 101009.7  | 92674.71  | 125607.3  | 84123.92  | 107296.7  | 101972.8 | 95201.51  |
| 73185.31  | 85614.14  | 72594.44  | 100713.8  | 94048.41  | 126524.5  | 72502.48  | 110854    | 88395.67 | 96834.08  |

|           |           |           |           |           |           |           |           |           |           |
|-----------|-----------|-----------|-----------|-----------|-----------|-----------|-----------|-----------|-----------|
| LP394.28_ | LP394.279 | LP394.28_ | LP394.280 | LP394.280 | LP394.279 | LP394.28_ | LP394.28_ | LP394.279 | LP394.280 |
| 119089.9  | 112373.9  | 69863.2   | 75174.96  | 80739.11  | 81024.99  | 93312.55  | 113685    | 82613.51  | 136319.2  |
| 126241.1  | 119929.5  | 71548.8   | 73171.25  | 71528.29  | 80217.23  | 88591.76  | 117010.9  | 95389.66  | 132770.1  |
| 123943.4  | 116450    | 73878.52  | 70891.31  | 79716.84  | 76544.75  | 88499.8   | 124652.6  | 95928.07  | 131464.5  |
| 113302.4  | 119670.3  | 67768.08  | 84308.39  | 78851.59  | 80441.51  | 84851.17  | 118230.6  | 99653.51  | 151471.7  |
| 120474.5  | 112558.7  | 81077.23  | 60476.32  | 79568.98  | 78508.81  | 89311.05  | 122665.8  | 98262.63  | 138206    |

|           |           |           |           |           |           |           |           |           |           |
|-----------|-----------|-----------|-----------|-----------|-----------|-----------|-----------|-----------|-----------|
| LP394.280 | LP394.28_ | LP394.279 | LP394.28_ | LP394.279 | LP394.280 | LP394.28_ | LP394.279 | LP394.28_ | LP394.279 |
| 107081.2  | 124161.1  | 136942    | 89183.67  | 66090.85  | 109430.6  | 86694.31  | 89418.62  | 96926.26  | 67845.57  |
| 107746.2  | 116499.9  | 125244.2  | 83034.19  | 77327.8   | 101520.2  | 71639.36  | 95504.84  | 93954.08  | 63509.06  |
| 108117.3  | 112770.8  | 138658    | 85363.68  | 78256.94  | 119340.1  | 87854.66  | 83928.81  | 101045.3  | 67058.79  |
| 108960.2  | 115413.8  | 125688.8  | 86219.18  | 67475.06  | 113902.3  | 78197.96  | 89820.83  | 96217.96  | 67252.36  |
| 113641.6  | 122244.6  | 135260.4  | 93843.59  | 78386.43  | 116722.4  | 77666.82  | 91092.68  | 93759.19  | 61113.54  |

|           |           |           |           |           |           |           |           |           |           |
|-----------|-----------|-----------|-----------|-----------|-----------|-----------|-----------|-----------|-----------|
| LP394.280 | LP394.279 | LP394.28_ | LP394.280 | LP394.28_ | LP394.279 | LP394.279 | LP394.28_ | LP394.279 | LP394.279 |
| 78929.35  | 66263.95  | 107158.1  | 68246.13  | 63920.87  | 100318.2  | 68798.75  | 58027.38  | 83932     | 52302.49  |
| 88050.57  | 69746.76  | 107764.1  | 77476.99  | 65668.89  | 101979.6  | 70212.41  | 62014.66  | 85661.42  | 57298.78  |
| 79308.67  | 68347.49  | 105573.5  | 73311.86  | 68093.77  | 99947.66  | 70870.08  | 58030.22  | 80247.89  | 48710.06  |
| 95275.39  | 66744.64  | 90477.51  | 69640.84  | 68655.88  | 95682.85  | 70564.98  | 59048.45  | 71769.33  | 50806.18  |
| 96254.65  | 65542.28  | 97391.6   | 69945.84  | 67312.82  | 96073.36  | 67042.12  | 57222.93  | 80650.24  | 52667.28  |



|           |           |           |           |           |           |           |           |           |           |
|-----------|-----------|-----------|-----------|-----------|-----------|-----------|-----------|-----------|-----------|
| LP394.293 | LP394.294 | LP394.293 | LP394.294 |
| 122158.5  | 142470.5  | 90739.22  | 99086.98  | 103582.8  | 90497.42  | 123900.2  | 112298.9  | 97209.54  | 145337.4  |
| 126773.3  | 137571.8  | 92956.99  | 97534.97  | 108219.2  | 89535.16  | 128576.2  | 111817.2  | 99720.87  | 128209.6  |
| 99642.14  | 138920.3  | 89076.75  | 99326.26  | 109131.4  | 93505.86  | 113680.3  | 108740.7  | 97424.3   | 131309.3  |
| 116515.5  | 143972.1  | 81177.28  | 94522.58  | 105827.7  | 112383.6  | 113707.6  | 107700.9  | 94489.18  | 154235    |
| 130257.8  | 129663.9  | 95441.5   | 94676.66  | 115429.8  | 92409.71  | 127918.1  | 113775.3  | 99694.53  | 144583.9  |

|           |           |           |           |           |           |           |           |           |           |
|-----------|-----------|-----------|-----------|-----------|-----------|-----------|-----------|-----------|-----------|
| LP394.293 | LP394.294 | LP394.329 | LP394.337 | LP394.352 | LP394.886 | LP395.220 | LP395.242 | LP395.277 | LP395.276 |
| 69583.25  | 59364.53  | 57085.16  | 57771.2   | 61946.56  | 135540.8  | 154450.2  | 43105.23  | 100825.9  | 84802.34  |
| 69639.34  | 67278.33  | 61350.47  | 22051.35  | 63287.21  | 121333.6  | 141395.8  | 44760.47  | 91740.77  | 81162.19  |
| 68452.84  | 60833.98  | 15952.21  | 61787.48  | 74284.25  | 134849.9  | 134669.9  | 49314.17  | 121990.7  | 82155.65  |
| 69173.93  | 63045.04  | 56117.45  | 21184.32  | 75497.96  | 158470.1  | 129668.5  | 52701.03  | 76438.81  | 86044.83  |
| 67962.56  | 60049.86  | 58160.91  | 22258.19  | 80413.09  | 107017.2  | 134035.9  | 52961.35  | 94878.15  | 89349.97  |

|           |           |           |           |           |           |           |           |           |           |
|-----------|-----------|-----------|-----------|-----------|-----------|-----------|-----------|-----------|-----------|
| LP395.315 | LP396.222 | LP396.222 | LP396.222 | LP396.223 | LP396.223 | LP396.223 | LP396.223 | LP396.223 | LP396.223 |
| 56376.16  | 94179.06  | 83385.49  | 78788.96  | 106439    | 122989.3  | 97760.71  | 100321.7  | 194639.6  | 69553.17  |
| 53207.98  | 102200.9  | 91934.45  | 73256.8   | 113846.2  | 112246.5  | 98697.18  | 89648.14  | 207413.7  | 74544.72  |
| 54226.23  | 104506.9  | 94043.68  | 72778.6   | 118612.1  | 115427.8  | 104124.7  | 100742.4  | 188501.4  | 69964.58  |
| 59620.24  | 95346.14  | 90320.23  | 80867.17  | 107791.9  | 125460.4  | 104710.1  | 102323.4  | 182409.3  | 77237.16  |
| 37783.6   | 102385    | 94472.08  | 72546.27  | 108877.2  | 134070.8  | 103566.5  | 95731.35  | 206631.8  | 70290.69  |

|           |           |           |           |           |           |           |           |           |           |
|-----------|-----------|-----------|-----------|-----------|-----------|-----------|-----------|-----------|-----------|
| LP396.223 | LP396.223 | LP396.258 | LP396.259 |
| 152767.8  | 106632.1  | 65732.17  | 93752.63  | 88222.8   | 119626.6  | 91206.68  | 94678.24  | 61299.87  | 112864.5  |
| 153593.7  | 104108.4  | 87692.54  | 85023.77  | 103758.4  | 122186.9  | 109184.6  | 104824.4  | 68574.26  | 124829.2  |
| 144409.4  | 111472.8  | 106555.4  | 106119.2  | 92571.18  | 125031.4  | 98817     | 114896.8  | 68843.31  | 100904.8  |
| 151678    | 102326.6  | 91481.4   | 95234.69  | 83098.09  | 118466    | 86552.28  | 101759.7  | 67940.9   | 106202.4  |
| 135701    | 105296.9  | 100931.1  | 99744.93  | 85046.12  | 113252.2  | 89949     | 106018.1  | 67490.59  | 104070.7  |

|           |           |           |           |           |           |           |           |           |           |
|-----------|-----------|-----------|-----------|-----------|-----------|-----------|-----------|-----------|-----------|
| LP396.259 |
| 125901.7  | 73433.99  | 52860.38  | 54731.54  | 51420.34  | 77722.18  | 69199.77  | 102872.1  | 77361.99  | 50048.99  |
| 134408.8  | 69412.55  | 61124.78  | 58298.88  | 65031.51  | 87767.92  | 68653.4   | 101254.3  | 78959.49  | 53142.16  |
| 138928.6  | 69062.58  | 48942.73  | 57961.23  | 48190.45  | 79414.5   | 68710.93  | 114614.8  | 76233.31  | 50787.01  |
| 137813    | 65475.17  | 55828.63  | 51746.88  | 53086.6   | 85330.58  | 65596.91  | 106295    | 76495.6   | 45203.26  |
| 143017    | 73512.67  | 56275     | 54587.86  | 48549.21  | 74356.88  | 56090.74  | 104716.3  | 76648.25  | 52334.2   |

|           |           |           |           |           |           |           |           |           |           |
|-----------|-----------|-----------|-----------|-----------|-----------|-----------|-----------|-----------|-----------|
| LP396.259 |
| 100472.4  | 62260.39  | 59643.2   | 83914.42  | 51885.73  | 64282.09  | 72155.95  | 58351.18  | 62431.57  | 76324.05  |
| 103931.9  | 56141.01  | 62268.01  | 83728.61  | 54383.3   | 61060.41  | 71211.68  | 48316.64  | 61923.24  | 76741.4   |
| 109686.8  | 64915.38  | 64479.41  | 86645.73  | 53285.19  | 70268.81  | 68205.95  | 60990.79  | 61207.08  | 77155.85  |
| 117661.2  | 54230.97  | 64329.03  | 82691.57  | 53054.19  | 69819.91  | 66119.69  | 51479.63  | 64612.67  | 79818.31  |
| 115913.6  | 63750.46  | 60079.32  | 80807     | 55436.85  | 69766.29  | 71818.94  | 54286.26  | 66519.61  | 74261.32  |

|           |           |           |           |           |           |           |           |           |           |
|-----------|-----------|-----------|-----------|-----------|-----------|-----------|-----------|-----------|-----------|
| LP396.259 |
| 79316.24  | 69889.98  | 78917.44  | 79301.82  | 44368.3   | 54960.56  | 90817.17  | 51704.89  | 40046.2   | 80883.21  |
| 73783.01  | 64074.76  | 83997.06  | 81102.86  | 44662.55  | 54951.68  | 90224.83  | 54643.17  | 43713.53  | 73858.71  |
| 68768.22  | 71735.41  | 77189.32  | 90865.01  | 41142.91  | 55823.03  | 82163.08  | 43910.07  | 42536.21  | 79220.57  |
| 69772.63  | 66598.63  | 73650.54  | 76474.74  | 37823.95  | 57130.1   | 89980.19  | 49549.19  | 42623.75  | 72948.31  |
| 63783.55  | 63435.59  | 77857.01  | 79489.87  | 39035.58  | 54630.72  | 91592.78  | 54810.75  | 41030.61  | 75000.87  |

|           |           |           |           |           |           |           |           |           |           |
|-----------|-----------|-----------|-----------|-----------|-----------|-----------|-----------|-----------|-----------|
| LP396.259 | LP396.259 | LP396.259 | LP396.259 | LP396.26_ | LP396.259 | LP396.259 | LP396.26_ | LP396.259 | LP396.259 |
| 91319.88  | 64580.95  | 45957.06  | 54464.14  | 93887.72  | 63166.95  | 43550     | 78300.52  | 33291.76  | 60121.1   |
| 97153.86  | 73942.36  | 50468.54  | 48899.43  | 98160.95  | 60988.79  | 40206.54  | 73957.18  | 31917.29  | 59881.94  |
| 86742.22  | 67905.34  | 41258.16  | 52684.89  | 99217.99  | 57912.82  | 38847.55  | 76154.71  | 31522.47  | 65350.87  |
| 92163.95  | 62422.21  | 38491.65  | 51402.33  | 94518.21  | 58521.79  | 33413.1   | 75562.84  | 31553.17  | 61318.39  |
| 86778.9   | 65249.84  | 45793.61  | 59657.49  | 97485.95  | 59407.99  | 42956.57  | 72812.46  | 34001.21  | 57946.71  |



|           |           |           |           |           |           |           |           |           |           |
|-----------|-----------|-----------|-----------|-----------|-----------|-----------|-----------|-----------|-----------|
| LP396.259 | LP396.259 | LP396.260 | LP396.259 |
| 56021.51  | 53337.26  | 39406.19  | 31681.3   | 69143.13  | 54763.26  | 50347.38  | 72594.58  | 74133.95  | 42156.15  |
| 56684.68  | 51354.43  | 41676.47  | 31309.72  | 64885.35  | 52848.83  | 47139.84  | 60960.46  | 74303.93  | 40082.39  |
| 57429.69  | 50327.53  | 46932.22  | 26407.22  | 61279.67  | 50865.03  | 43424.16  | 73846.65  | 77509.57  | 47632.28  |
| 54241.88  | 42505.26  | 37549.85  | 25844.93  | 59870.52  | 53977.96  | 43702.28  | 73241.9   | 72715.03  | 38520.71  |
| 60142.14  | 53178.65  | 41931.58  | 29043.04  | 59691.79  | 50319.3   | 44284.44  | 67140.75  | 72401.12  | 41836.07  |

|            |            |            |            |            |            |            |            |            |            |
|------------|------------|------------|------------|------------|------------|------------|------------|------------|------------|
| LP396.259! | LP396.259! | LP396.26_! | LP396.26_! | LP396.26_! | LP396.26_! | LP396.259! | LP396.259! | LP396.259! | LP396.259! |
| 67769.56   | 75559.75   | 36945.64   | 37504.03   | 45077.3    | 60389.97   | 74082.51   | 50214.66   | 80956.8    | 63570.88   |
| 68393.82   | 79452.73   | 37768.23   | 36387.67   | 49443.51   | 65128.48   | 75745.04   | 43404.04   | 84286.54   | 59763.34   |
| 68185.63   | 81066.31   | 35767.18   | 37140.96   | 45887.29   | 72220.46   | 67500.02   | 44188.22   | 80724.44   | 67351.2    |
| 69644.52   | 77031.99   | 29271      | 30919.63   | 41349.03   | 67984.93   | 71060.58   | 51211.84   | 89626.23   | 64679.27   |
| 70490.25   | 74246.58   | 35245.63   | 32303.29   | 41392.14   | 65032.15   | 66295.8    | 39914.11   | 80681.97   | 59016.64   |

|           |           |           |           |           |           |           |           |           |           |
|-----------|-----------|-----------|-----------|-----------|-----------|-----------|-----------|-----------|-----------|
| LP396.259 | LP396.26_ | LP396.259 | LP396.26_ | LP396.26_ | LP396.260 | LP396.259 | LP396.260 | LP396.259 | LP396.260 |
| 34917.66  | 39683.71  | 61832.51  | 39652.39  | 64742.59  | 39241.77  | 63005.49  | 48995.11  | 46066.97  | 81188.84  |
| 31148.45  | 41400.83  | 64131.4   | 40890.6   | 60995.48  | 45661.74  | 60570.32  | 48446.13  | 46197.93  | 71456.77  |
| 33847.52  | 36605.2   | 61673.74  | 38118.65  | 63325.13  | 35151.26  | 64998.21  | 45738.31  | 51905.92  | 76033.75  |
| 29104.7   | 38481.55  | 59818.1   | 39284.34  | 59381.99  | 33752.31  | 64579.94  | 43305.58  | 44289.85  | 79249.73  |
| 29883.51  | 41880.36  | 61726     | 39893.51  | 67849     | 35603.27  | 62141.81  | 46020.15  | 44581.68  | 73846.83  |

|           |           |           |           |           |           |           |           |           |           |
|-----------|-----------|-----------|-----------|-----------|-----------|-----------|-----------|-----------|-----------|
| LP396.26_ | LP396.259 | LP396.280 | LP396.279 | LP396.332 | LP396.383 | LP396.420 | LP396.419 | LP396.419 | LP396.420 |
| 57851.26  | 111058.1  | 80382.26  | 78023.08  | 44699.08  | 21170.7   | 44619.54  | 19060.85  | 15627.13  | 6842.477  |
| 55830.68  | 112945.9  | 76879.99  | 77406.45  | 42997.51  | 18476.29  | 43092.76  | 18494.35  | 13631.23  | 6173.954  |
| 53447.58  | 101338.9  | 69424.71  | 77615.09  | 41880.27  | 17584.93  | 41628.88  | 26690.37  | 26719.98  | 7922.519  |
| 50043.84  | 108587.6  | 63675.63  | 76426.64  | 39413.23  | 23063.99  | 35488.58  | 26791.72  | 36776.23  | 12473.52  |
| 58167.68  | 117630.6  | 63087.73  | 78918.22  | 39943.36  | 25683.4   | 41518.35  | 29845.88  | 35957.98  | 13302.32  |

|           |           |           |           |           |           |           |           |           |           |
|-----------|-----------|-----------|-----------|-----------|-----------|-----------|-----------|-----------|-----------|
| LP396.420 | LP396.883 | LP397.183 |
| 13715.35  | 68683.16  | 102164.1  | 105534.7  | 91301.4   | 87038.02  | 101833.2  | 91272.82  | 57963.96  | 89077.56  |
| 17527.34  | 63790.26  | 99569.84  | 65362.88  | 71140.13  | 85932.29  | 101632.9  | 69502.07  | 64670.41  | 92235.6   |
| 14275.95  | 74153.23  | 120265.3  | 79772.81  | 105745.8  | 83178.86  | 70101.85  | 67556.4   | 90373.42  | 112724.2  |
| 13357.06  | 89865.47  | 74688.22  | 67628.96  | 105521.8  | 121512.2  | 112969.5  | 74404.58  | 62426.17  | 71609.98  |
| 12632.04  | 53905.56  | 97681.9   | 87574.9   | 75900.5   | 101387    | 79515.47  | 94874.52  | 107454.3  | 66014.13  |

|           |           |           |           |           |           |           |           |           |           |
|-----------|-----------|-----------|-----------|-----------|-----------|-----------|-----------|-----------|-----------|
| LP397.183 |
| 73122.03  | 84629.1   | 101949.6  | 94490.45  | 96594.05  | 96288.54  | 94047.2   | 105022.2  | 101834.7  | 69570.56  |
| 67865.26  | 93699     | 80510.29  | 93196.22  | 85246.04  | 103373.3  | 98793.5   | 83703.65  | 79341.93  | 96198.82  |
| 75469.7   | 87267.44  | 57879.92  | 79697.06  | 82516.22  | 86801.25  | 83934.22  | 98169.9   | 80111.41  | 82743.7   |
| 74242.13  | 74590.64  | 88191.75  | 88531.09  | 70837.63  | 78108.15  | 90894.79  | 136063.5  | 67042.09  | 82219.29  |
| 122541.4  | 74505.63  | 93711.89  | 80263.73  | 68023.5   | 79906.83  | 114170.5  | 82478.55  | 101973.2  | 98082.37  |

|           |           |           |           |           |           |           |           |           |           |
|-----------|-----------|-----------|-----------|-----------|-----------|-----------|-----------|-----------|-----------|
| LP397.183 |
| 113407.5  | 111625.9  | 48057.41  | 116522.4  | 88704.18  | 51031.61  | 85655.22  | 108120.6  | 88102.68  | 87545.39  |
| 106364.2  | 95027.78  | 44492.44  | 87914.51  | 73478.25  | 60048.82  | 103637.8  | 85300.72  | 74344.7   | 82820.97  |
| 105048.6  | 104104    | 42016.63  | 72828.02  | 75709.71  | 57055.31  | 102946.2  | 148217.1  | 119606.4  | 87271.67  |
| 105071.5  | 108929.8  | 37115.51  | 79635.2   | 99221.9   | 45689.13  | 70166.35  | 162190    | 87461.25  | 118280.5  |
| 140181.4  | 118617.5  | 52914.38  | 67628.05  | 79910.43  | 50479.52  | 111536.7  | 121211.8  | 139007.2  | 65507.89  |

|           |           |           |           |           |           |           |           |           |           |
|-----------|-----------|-----------|-----------|-----------|-----------|-----------|-----------|-----------|-----------|
| LP397.183 |
| 38672.6   | 71564.33  | 115386.2  | 45041.51  | 101742.3  | 75316.4   | 81406.99  | 61517.06  | 92639.23  | 122233.2  |
| 46278.89  | 72598.57  | 90766.44  | 39941.24  | 91996.32  | 91065.71  | 68482.9   | 71646.22  | 97488.6   | 118859    |
| 40342.34  | 77607.49  | 82304.81  | 45686.15  | 82848.18  | 86331.35  | 66702.06  | 75535.77  | 110777.8  | 110589.6  |
| 44088.17  | 83966.83  | 76444.32  | 41586.38  | 90287.67  | 53914.33  | 85892.99  | 63212.95  | 122833    | 116147    |
| 54512.01  | 67776.54  | 70830.61  | 46405.52  | 101707    | 101949.9  | 66050.56  | 73129.04  | 114454.7  | 97989.1   |



|           |           |           |           |           |           |           |           |           |           |
|-----------|-----------|-----------|-----------|-----------|-----------|-----------|-----------|-----------|-----------|
| LP397.183 |
| 162531.5  | 47308.33  | 105830    | 111278.2  | 98244.18  | 55912.09  | 81223.52  | 99876.2   | 93681.72  | 107470.4  |
| 99999.5   | 45852.2   | 89080.52  | 111430.5  | 104376.3  | 55864.51  | 86885.78  | 73629.32  | 83293.87  | 87166.17  |
| 144048.1  | 32850.1   | 100437.9  | 120897.1  | 115403.1  | 39131.54  | 90599.74  | 93078.58  | 116435.6  | 83054.29  |
| 123462.1  | 38231.61  | 126679.2  | 94259.22  | 96587.1   | 31155.05  | 96382.69  | 71948.39  | 93289.32  | 125556.5  |
| 109179.1  | 44072.67  | 110834.8  | 133955.5  | 113007.6  | 41019.07  | 97810.38  | 85971.19  | 120896.5  | 88843.19  |

|           |           |           |           |           |           |           |           |           |           |
|-----------|-----------|-----------|-----------|-----------|-----------|-----------|-----------|-----------|-----------|
| LP397.183 |
| 55229.23  | 47242.17  | 38369.02  | 94683.05  | 85226.21  | 34793.35  | 82629.85  | 84196.02  | 103501.6  | 31796.47  |
| 61903.25  | 63864     | 28412.72  | 104480.6  | 92561.5   | 35258.62  | 83341.04  | 98705.96  | 88459.6   | 28566.95  |
| 42401.36  | 49732.02  | 29441.34  | 85287.96  | 94141.36  | 45612.45  | 95153.92  | 91737.74  | 82062.73  | 31724.12  |
| 37791.85  | 49793.91  | 31919.14  | 77334.54  | 94784.98  | 34106.72  | 91250.72  | 141754.1  | 105483.6  | 27562.86  |
| 47175.56  | 59107.59  | 34119.79  | 94944.18  | 109742.1  | 50792.11  | 80300.69  | 65462.73  | 111041.1  | 43739.12  |

|           |           |           |           |           |           |           |           |           |           |
|-----------|-----------|-----------|-----------|-----------|-----------|-----------|-----------|-----------|-----------|
| LP397.183 |
| 120831.6  | 113776.5  | 74449.9   | 64327.34  | 42247.7   | 62527.32  | 42987.64  | 89042.39  | 79607.94  | 105026    |
| 111260.5  | 106141.7  | 76349.41  | 36136.22  | 31597.61  | 52422.96  | 44205.77  | 86516.89  | 82138.19  | 78476.12  |
| 124716.7  | 96245.9   | 54880.51  | 51673.35  | 42254.35  | 63527.86  | 36587.28  | 88977.06  | 70797.03  | 67216.73  |
| 74455.25  | 85173.91  | 55038.56  | 36683.5   | 39519.24  | 73480.79  | 52077.97  | 72656.89  | 58441.4   | 72853.59  |
| 102793.1  | 100658.6  | 69187.7   | 38618.83  | 34345.79  | 54498.42  | 44838.34  | 97292.84  | 59810.68  | 82851.62  |

|           |           |           |           |           |           |           |           |           |           |
|-----------|-----------|-----------|-----------|-----------|-----------|-----------|-----------|-----------|-----------|
| LP397.183 |
| 101280.3  | 99890.26  | 80360.5   | 81874.66  | 75398.63  | 90794.21  | 66399.88  | 109143.2  | 62674.33  | 69107.4   |
| 127661.9  | 101821.2  | 67284.15  | 84248.62  | 82135.6   | 104288    | 123903.2  | 88208.39  | 52146.66  | 73322.23  |
| 130105.6  | 90032.98  | 80417.59  | 100585.8  | 79354.6   | 95262.6   | 71275.55  | 117270.7  | 61530.27  | 71699.72  |
| 92266.02  | 74687.99  | 85086.8   | 81720.05  | 121919    | 91582.35  | 79422.76  | 75894.31  | 90315.55  | 71345.06  |
| 105625.1  | 81247.61  | 73703.84  | 76151.1   | 77733.6   | 100869.5  | 87994.68  | 110472.6  | 60303.17  | 72220.08  |

|           |           |           |           |           |           |           |           |           |           |
|-----------|-----------|-----------|-----------|-----------|-----------|-----------|-----------|-----------|-----------|
| LP397.183 | LP397.183 | LP397.183 | LP397.183 | LP397.183 | LP397.183 | LP397.201 | LP397.201 | LP397.216 | LP397.230 |
| 76851.11  | 120135    | 28496.79  | 90991.32  | 83846.7   | 103267.7  | 10144.06  | 30137.53  | 67715.84  | 230577.4  |
| 84825.24  | 73642.54  | 51242.59  | 119030    | 83613.92  | 98804.7   | 38229.28  | 30644.1   | 121960.2  | 234840.4  |
| 85224.58  | 72669.04  | 39002.13  | 108091    | 69456.89  | 101997.3  | 33705.44  | 26213.72  | 125651.5  | 237567.5  |
| 54043.85  | 60401.9   | 41171.4   | 96068.06  | 72225.29  | 126069.8  | 34496.99  | 26308.44  | 117369.4  | 195563.5  |
| 74536.17  | 79766.81  | 31871.57  | 131640.9  | 108362.5  | 92865.5   | 33113.75  | 26081.37  | 82494.44  | 199748.6  |

|           |           |           |           |           |           |           |           |           |           |
|-----------|-----------|-----------|-----------|-----------|-----------|-----------|-----------|-----------|-----------|
| LP397.258 | LP397.258 | LP397.271 | LP397.293 | LP397.294 | LP397.294 | LP397.331 | LP397.331 | LP397.331 | LP397.387 |
| 24967.45  | 45083.85  | 225797.7  | 65684.42  | 60123.88  | 32067.06  | 41288.17  | 57767.75  | 55877.5   | 16210.19  |
| 28490.11  | 46425.72  | 232719    | 59437     | 59450.78  | 33522     | 42162.15  | 61511.65  | 52242.13  | 12501.81  |
| 26646.67  | 47597.44  | 256010.5  | 70171.25  | 61686.12  | 38840.65  | 40322.41  | 61154.8   | 61150.75  | 14944.12  |
| 21525.71  | 38843.75  | 260156.4  | 39497.61  | 41840.8   | 26178.65  | 37373.69  | 58854.68  | 50687.74  | 10969.11  |
| 20796.98  | 42958.02  | 306910.4  | 58221.76  | 69979.39  | 34073.4   | 37744.87  | 56175.48  | 60654.49  | 8985.564  |

|           |           |           |           |           |           |           |           |           |           |
|-----------|-----------|-----------|-----------|-----------|-----------|-----------|-----------|-----------|-----------|
| LP397.415 | LP398.238 |
| 83673.07  | 96170.73  | 114638.5  | 106997.1  | 137583.6  | 81210.64  | 90808.5   | 110290.9  | 74767.66  | 88051.14  |
| 69390.8   | 91925.22  | 155696.2  | 78218.91  | 100847.7  | 88124.93  | 92730.97  | 120878.3  | 81980.08  | 94727.04  |
| 78662.74  | 91401.85  | 146551.6  | 82472.49  | 95396.78  | 81042.85  | 83043.96  | 123767.7  | 73799.27  | 90848.84  |
| 60937.97  | 107594.3  | 166422.1  | 70347.94  | 166053.1  | 89515.24  | 87057.39  | 115281.1  | 75594.29  | 95531.65  |
| 69901.3   | 87246.76  | 141737.4  | 84169.34  | 94053.24  | 80145.1   | 83133.28  | 109963.9  | 76687.74  | 96966.67  |

|           |           |           |           |           |           |           |           |           |           |
|-----------|-----------|-----------|-----------|-----------|-----------|-----------|-----------|-----------|-----------|
| LP398.239 | LP398.238 | LP398.238 | LP398.238 | LP398.239 | LP398.238 | LP398.239 | LP398.239 | LP398.238 | LP398.239 |
| 110766    | 56163.96  | 78934.85  | 92947.13  | 108057.7  | 88420.2   | 75635.96  | 68918.5   | 90922.67  | 83034.09  |
| 117038.5  | 59841.76  | 78891.85  | 100539.4  | 98446.49  | 85900.58  | 84201.94  | 70749.49  | 95454.05  | 74236.13  |
| 112171.6  | 58012.93  | 80638.01  | 99195.73  | 100182.8  | 77792.5   | 83307.64  | 71728.96  | 92567.89  | 85447.15  |
| 105469.9  | 57744     | 72169.55  | 116227    | 108867.3  | 85979.45  | 82076.79  | 74090.59  | 95072.55  | 83585.19  |
| 112045.4  | 53203.51  | 70821.31  | 104081.9  | 115155.6  | 85405.36  | 79926.45  | 75031.84  | 93566.48  | 80586.83  |



|           |           |           |           |           |           |           |           |           |           |
|-----------|-----------|-----------|-----------|-----------|-----------|-----------|-----------|-----------|-----------|
| LP398.238 | LP398.238 | LP398.238 | LP398.239 | LP398.239 | LP398.239 | LP398.238 | LP398.238 | LP398.239 | LP398.238 |
| 63333.61  | 118564.9  | 89924.08  | 88025.92  | 77027.5   | 86193.89  | 90496.03  | 92451.36  | 84701.54  | 61577.97  |
| 68189.8   | 112627.4  | 74340.98  | 90288.61  | 76655.26  | 89449.08  | 96576.33  | 71049.9   | 86358.77  | 67274.72  |
| 67781.35  | 115229.2  | 70535.45  | 88114.76  | 71476.63  | 82615.44  | 100264.5  | 81182.89  | 88852.33  | 65127.23  |
| 67366.7   | 107390.7  | 76223.08  | 96740.81  | 74793.75  | 85414.26  | 88355.79  | 77028.18  | 81795.98  | 56217.81  |
| 67103.79  | 117781.9  | 73451.67  | 96173.39  | 80007.65  | 84008.95  | 93296.63  | 78094.88  | 81806.65  | 58220.3   |

|           |           |           |           |           |           |           |           |           |           |
|-----------|-----------|-----------|-----------|-----------|-----------|-----------|-----------|-----------|-----------|
| LP398.305 | LP398.399 | LP398.436 | LP399.163 | LP399.163 | LP399.163 | LP399.162 | LP399.163 | LP399.163 | LP399.163 |
| 16178.28  | 131867.6  | 99552.56  | 90424.58  | 129175.8  | 109992.3  | 124315.1  | 114579    | 169726.6  | 103814.1  |
| 16913.4   | 130772.3  | 67494.53  | 96197.41  | 113659.5  | 110588.9  | 122997.2  | 98758.44  | 177777.7  | 112458.1  |
| 14733.36  | 132202.8  | 119978.5  | 92097.13  | 114470.4  | 112479.5  | 133321.5  | 102049.2  | 161771.8  | 115000.1  |
| 11883.12  | 113331.7  | 99786.64  | 86675.27  | 116836.3  | 102221.2  | 123054.5  | 104962.8  | 158069.1  | 101858.8  |
| 16410.16  | 125929.7  | 144590.2  | 92286.61  | 115311.6  | 99629.31  | 126868    | 105801.4  | 156478    | 97696.9   |

|           |           |           |           |           |           |           |           |           |           |
|-----------|-----------|-----------|-----------|-----------|-----------|-----------|-----------|-----------|-----------|
| LP399.163 | LP399.163 | LP399.163 | LP399.162 | LP399.199 | LP399.199 | LP399.198 | LP399.199 | LP399.199 | LP399.199 |
| 97426.82  | 127877.3  | 119508.4  | 177409.2  | 113938    | 147994.9  | 134040    | 138774.8  | 123223.7  | 131896.9  |
| 98414.97  | 127594.9  | 120962.7  | 159164.5  | 101041.7  | 116733.7  | 123183.3  | 109015.9  | 168101.9  | 138121    |
| 100345.9  | 126756.1  | 124889.2  | 168430.1  | 89093.94  | 128929.8  | 89971.14  | 158425.9  | 112187.9  | 147566.4  |
| 92221.16  | 106611.3  | 121475    | 150727.5  | 96783.71  | 100325.1  | 137829.8  | 126513    | 146455    | 167685.8  |
| 104397    | 130242.6  | 117876    | 148557.1  | 114312.2  | 109910.7  | 95927.64  | 124252.2  | 120882.1  | 137486.8  |

|           |           |           |           |           |           |           |           |           |           |
|-----------|-----------|-----------|-----------|-----------|-----------|-----------|-----------|-----------|-----------|
| LP399.199 |
| 161391.6  | 146969.6  | 87694.11  | 155550.4  | 118786.4  | 103753.6  | 166550.8  | 159358.5  | 142651.3  | 103444.6  |
| 200112.5  | 96817.66  | 105393    | 104104.8  | 115993.8  | 129234.1  | 146558.8  | 99064.38  | 140166.1  | 86927     |
| 176274.9  | 116111.1  | 132111.9  | 89212.68  | 217684.8  | 162641.4  | 175153.7  | 112270.6  | 179444.5  | 100721.3  |
| 142191.3  | 76846.26  | 137403.7  | 96651.75  | 159913.4  | 110496.8  | 129293    | 139420.4  | 132933.1  | 112900.8  |
| 129198    | 89723.36  | 89411.4   | 135544.1  | 187217.1  | 103118.3  | 145598.1  | 111432.9  | 161513.9  | 88780.86  |

|           |           |           |           |           |           |           |           |           |           |
|-----------|-----------|-----------|-----------|-----------|-----------|-----------|-----------|-----------|-----------|
| LP399.199 | LP399.199 | LP399.199 | LP399.199 | LP399.199 | LP399.198 | LP399.199 | LP399.199 | LP399.199 | LP399.199 |
| 117893.6  | 140656.5  | 62305.27  | 152351.7  | 108341.7  | 91866.2   | 133948.4  | 37303.99  | 133173.2  | 229566.9  |
| 115507.3  | 151393.4  | 39485.83  | 169275.9  | 95305.6   | 105091.4  | 126835.8  | 42294.86  | 171951.6  | 146208.1  |
| 135714.8  | 156119.9  | 49050.18  | 112398.1  | 105972.7  | 122810.6  | 100509.2  | 33279.44  | 143534.3  | 159448.8  |
| 154551.6  | 145901.2  | 49442.9   | 90149.67  | 85000.31  | 130293    | 149525.2  | 36865.1   | 161579.9  | 170958.7  |
| 111089.1  | 139084.6  | 47361.51  | 157419.3  | 97536.64  | 78216     | 116403    | 28988.22  | 130923.6  | 186129.8  |

|           |           |           |           |           |           |           |           |           |           |
|-----------|-----------|-----------|-----------|-----------|-----------|-----------|-----------|-----------|-----------|
| LP399.199 |
| 107607.2  | 151542.9  | 175704.6  | 71640.99  | 94965.41  | 208154.7  | 116526.9  | 106913.5  | 86061.29  | 222124.8  |
| 86347.12  | 158706.6  | 111664.9  | 93749.64  | 130806.5  | 137813.8  | 90495.07  | 84393.77  | 118904.3  | 161280.8  |
| 96974.04  | 194219.2  | 123594.9  | 66255.61  | 115552.4  | 153110.8  | 129018.5  | 119097.4  | 90661.85  | 201823.5  |
| 114835.3  | 144946.2  | 120220.6  | 91514.15  | 103727.7  | 182688.8  | 124962.9  | 113243    | 95482.27  | 168046.5  |
| 92111.45  | 159956.5  | 127553.8  | 129336.8  | 118600.4  | 108672.9  | 108999.4  | 87603.04  | 103296.8  | 156497    |

|           |           |           |           |           |           |           |           |           |           |
|-----------|-----------|-----------|-----------|-----------|-----------|-----------|-----------|-----------|-----------|
| LP399.199 |
| 69071.1   | 172494.6  | 157679.2  | 123228.5  | 150437.8  | 164372.1  | 138862.6  | 112233.1  | 127821.6  | 125386.3  |
| 110855.2  | 175046.7  | 157346.4  | 110043.4  | 111085.2  | 171951.3  | 168897.1  | 121992.7  | 116245.6  | 134159.4  |
| 75410.73  | 157565.9  | 107915.6  | 120844.1  | 126219.9  | 156668.3  | 136576.9  | 106123.9  | 113039.9  | 173028.8  |
| 88814.05  | 153363.3  | 163181.6  | 115977.4  | 113499.5  | 167210.7  | 140944.2  | 125514.5  | 159737.1  | 132169    |
| 78631.11  | 123383.9  | 125557.7  | 107810.4  | 105003.4  | 165676    | 140213.5  | 162885.3  | 137695.7  | 125674.4  |

|           |           |           |           |           |           |           |           |           |           |
|-----------|-----------|-----------|-----------|-----------|-----------|-----------|-----------|-----------|-----------|
| LP399.199 |
| 169363.8  | 91364.93  | 144499    | 93231.9   | 105566.2  | 117806    | 172915.1  | 220016.1  | 78093.85  | 34034.38  |
| 97543.84  | 101078.7  | 147157.6  | 82067.74  | 95182.49  | 116330.6  | 172091.9  | 131408.5  | 88606.14  | 63355.25  |
| 113295.7  | 134238.7  | 153664.9  | 111526.6  | 90763.19  | 84649.54  | 137045.9  | 148711.4  | 70591.08  | 43614.13  |
| 98319.31  | 97022.26  | 158933.6  | 88392.14  | 97641.16  | 87107.72  | 124641.8  | 125309.4  | 89169.12  | 44530.15  |
| 77402.31  | 119608.2  | 149028.9  | 87685.24  | 82054.03  | 106153.8  | 171272.7  | 123101.6  | 81319.12  | 33531.41  |



|           |           |           |           |           |           |           |           |           |           |
|-----------|-----------|-----------|-----------|-----------|-----------|-----------|-----------|-----------|-----------|
| LP399.199 |
| 102288.1  | 121165.1  | 135317.1  | 99796.88  | 93791.61  | 110334.8  | 146255.9  | 116814.9  | 101150.4  | 140537.4  |
| 96835.71  | 154199.5  | 101795.7  | 146640.6  | 101446.7  | 122613.2  | 114678.4  | 124133.5  | 141412    | 167354.7  |
| 129537.4  | 178802    | 106986.5  | 127552.1  | 84413.67  | 107234.9  | 121364.7  | 101487.1  | 137013.6  | 105083    |
| 117939.3  | 138807.4  | 75062.33  | 124622.4  | 106673.8  | 184888.4  | 121631.2  | 71729.6   | 95209.18  | 217634.6  |
| 110808    | 155173.5  | 71195.94  | 103681.4  | 94525.47  | 169099.9  | 141212    | 82881.72  | 117005.1  | 164077.7  |

|           |           |           |           |           |           |           |           |           |           |
|-----------|-----------|-----------|-----------|-----------|-----------|-----------|-----------|-----------|-----------|
| LP399.199 |
| 59608.61  | 40224.67  | 125664.5  | 128477.1  | 130689.6  | 73524.6   | 47280.11  | 64897.84  | 92282.41  | 92625.39  |
| 62298.15  | 42129.13  | 202580.6  | 137877.8  | 194214.8  | 45123.15  | 52219.98  | 53847.81  | 130283.8  | 114824.2  |
| 86560.66  | 39706.03  | 103085.5  | 119466.9  | 117783.5  | 49983.79  | 43306.9   | 50048.86  | 84400.45  | 86402.29  |
| 51582.68  | 45684.77  | 136936    | 119712.8  | 119207.2  | 68693.94  | 45557.83  | 48468.65  | 105736.8  | 104217.4  |
| 56651.32  | 44240.53  | 146282.4  | 120670.5  | 153635.9  | 56748.31  | 50277.58  | 43875.19  | 102511.8  | 108722.6  |

|           |           |           |           |           |           |           |           |           |           |
|-----------|-----------|-----------|-----------|-----------|-----------|-----------|-----------|-----------|-----------|
| LP399.199 | LP399.237 | LP399.250 |
| 76222.01  | 41250.98  | 138307.2  | 98438.36  | 169521    | 65605.55  | 135410.5  | 70586.09  | 99765.6   | 35321.06  |
| 92253.39  | 46849.36  | 96995.93  | 143406.7  | 126513.1  | 54551.03  | 112387.9  | 74091.49  | 110413.4  | 32783.28  |
| 68739.77  | 28732.38  | 133411.3  | 86578.01  | 163772.8  | 61832.38  | 133186.6  | 48123.97  | 108425.1  | 34476.9   |
| 89791.51  | 57890.9   | 167962.3  | 138447.7  | 131515.8  | 51310.76  | 117334.4  | 68307.05  | 111548.9  | 32337.86  |
| 89651.27  | 33423.83  | 141416.6  | 140164.1  | 106942.2  | 93383.62  | 120856.1  | 50635.18  | 108384.9  | 30502.87  |

|           |           |           |           |           |           |           |           |           |           |
|-----------|-----------|-----------|-----------|-----------|-----------|-----------|-----------|-----------|-----------|
| LP399.253 | LP399.259 | LP399.269 | LP399.331 | LP399.358 | LP399.358 | LP399.394 | LP399.430 | LP399.431 | LP399.431 |
| 40512.34  | 28748.62  | 20975.69  | 23532.82  | 68049.86  | 82790.45  | 5840.147  | 13136.35  | 47981.28  | 31190.65  |
| 43262.17  | 33273.2   | 19300.76  | 23307.23  | 85335.94  | 76699.32  | 4035.951  | 13232.24  | 53502.04  | 25098.55  |
| 40604.94  | 34386.55  | 16554.86  | 18977.23  | 76455.79  | 83747.77  | 6875.405  | 21356.21  | 61000.27  | 32441.07  |
| 41048.04  | 42291.37  | 14243.8   | 19282.28  | 65296.12  | 56767.59  | 2422.774  | 24375.93  | 61392.72  | 31362.01  |
| 34661.42  | 44497.56  | 15714.99  | 23366.46  | 80774.59  | 61674.79  | 2688.624  | 28054.64  | 61799.71  | 28809.8   |

|           |           |           |           |           |           |           |           |           |           |
|-----------|-----------|-----------|-----------|-----------|-----------|-----------|-----------|-----------|-----------|
| LP399.430 | LP399.439 | LP399.472 | LP400.269 | LP400.269 | LP400.269 | LP400.305 | LP400.305 | LP400.305 | LP400.306 |
| 13405.35  | 21450.3   | 92956.14  | 38721.84  | 48597.24  | 46073.15  | 46490.26  | 37820.58  | 56142.45  | 50480.79  |
| 16476.23  | 26599.66  | 92667.4   | 42117.69  | 46983.74  | 48796.36  | 46366.56  | 39301.91  | 54018.65  | 53298.72  |
| 15349.13  | 21214.87  | 79068.57  | 40224.33  | 48815.62  | 48922.3   | 46893.91  | 37155.08  | 60975.73  | 56630.26  |
| 14200.22  | 18543.74  | 75253.04  | 38283.58  | 47343.61  | 50438.5   | 51186.79  | 37955.07  | 63828.65  | 65592.76  |
| 14333.23  | 25640.91  | 78219.15  | 43502.26  | 46580.85  | 46565.66  | 46152.68  | 39715.8   | 55356.06  | 59509.47  |

|           |           |           |           |           |           |           |           |           |           |
|-----------|-----------|-----------|-----------|-----------|-----------|-----------|-----------|-----------|-----------|
| LP400.305 | LP400.342 | LP400.361 | LP400.398 | LP400.434 | LP401.177 | LP401.178 | LP401.178 | LP401.178 | LP401.178 |
| 51607.81  | 208333.7  | 16240.31  | 10116.84  | 19629.77  | 139853.2  | 120136.4  | 163573.4  | 174418    | 120873.6  |
| 49474.34  | 204042.4  | 15296.38  | 12851.72  | 19839.98  | 152567.9  | 118075.8  | 111859.6  | 190249.4  | 92340.69  |
| 45387.02  | 193218.3  | 13648.23  | 12126.4   | 21321.33  | 124735.4  | 84067.51  | 162715.3  | 156932.6  | 122548.5  |
| 44015.83  | 200522.4  | 12250.71  | 4521.272  | 18372.94  | 139326.1  | 112076.8  | 133859.4  | 164411.2  | 122485.8  |
| 45740.54  | 192516    | 13996.83  | 11252.1   | 22338.27  | 132839.3  | 110910.4  | 127279.3  | 211386.4  | 151964.3  |

|           |           |           |           |           |           |           |           |           |           |
|-----------|-----------|-----------|-----------|-----------|-----------|-----------|-----------|-----------|-----------|
| LP401.178 |
| 157889.6  | 127260    | 126350.7  | 165377    | 107857.3  | 220066    | 178867    | 170316    | 157086.6  | 163546.1  |
| 175175.9  | 195544.7  | 138944.6  | 121716.6  | 178374.7  | 143515    | 166721.7  | 160275.1  | 132223.4  | 210050.1  |
| 153937    | 91148.32  | 169941.4  | 202921.5  | 130070.7  | 189854.7  | 142353.8  | 162043.5  | 158184.1  | 137619.1  |
| 163581.5  | 123939.2  | 105636.1  | 169596.1  | 148816    | 168765.5  | 162699.6  | 192817.6  | 206684.7  | 179703.7  |
| 132271    | 117271    | 142189.6  | 163485.7  | 203283.5  | 129374.8  | 213552.2  | 158089.7  | 115935.2  | 187471.6  |

|           |           |           |           |           |           |           |           |           |           |
|-----------|-----------|-----------|-----------|-----------|-----------|-----------|-----------|-----------|-----------|
| LP401.178 |
| 80424.56  | 129295.5  | 147355.2  | 225951.6  | 172502.8  | 129540.9  | 195194    | 189418.3  | 171078.2  | 218709.3  |
| 79970.93  | 137803.9  | 179393    | 146403.7  | 190365.4  | 149421    | 234813.9  | 194582.7  | 156376.1  | 188044.6  |
| 101535.8  | 123361.7  | 129216.2  | 302959.9  | 248832.1  | 193556.3  | 178435    | 202560.3  | 128513.8  | 211357.4  |
| 124387.4  | 109765.9  | 160562.9  | 221501.2  | 224109.9  | 126527.6  | 258752.1  | 230331.6  | 186375.8  | 232440.6  |
| 106462.9  | 119164.2  | 120167.8  | 165063.7  | 163460.4  | 135204.8  | 182107.4  | 155434.4  | 139611.3  | 199932    |



|           |           |           |           |           |           |           |           |           |           |
|-----------|-----------|-----------|-----------|-----------|-----------|-----------|-----------|-----------|-----------|
| LP401.178 |
| 155472.8  | 129228.3  | 171843.5  | 212265.8  | 166805.7  | 85483.17  | 166433.4  | 131053    | 219458.9  | 129429.1  |
| 108214.2  | 166266    | 125311.5  | 165523.2  | 256277.7  | 178005.2  | 173938.7  | 175007.1  | 134665.3  | 233184.8  |
| 136882.3  | 168478.5  | 108620.8  | 147435    | 258615.3  | 156746    | 150290.5  | 204960.7  | 209435.2  | 204334.6  |
| 111179.3  | 127925.2  | 127213.9  | 257904.8  | 165675.8  | 102592.4  | 174866.9  | 130892.3  | 163033.3  | 141348.5  |
| 137046.7  | 118607.5  | 151300.6  | 160128.4  | 160187.7  | 96645.89  | 157724.5  | 140381.7  | 192582.7  | 232539.4  |

|           |           |           |           |           |           |           |           |           |           |
|-----------|-----------|-----------|-----------|-----------|-----------|-----------|-----------|-----------|-----------|
| LP401.178 |
| 163340.5  | 97762.89  | 126166    | 136715.6  | 163064.3  | 105491.5  | 226518.1  | 101612.8  | 232437.2  | 132340.3  |
| 136714.5  | 88195.6   | 113328.8  | 152078.4  | 189839.5  | 135512.2  | 238486.5  | 121688.6  | 224305    | 131808.7  |
| 218288.6  | 87342.4   | 193615.3  | 179176.4  | 204843.9  | 96822.49  | 213439.2  | 116221.4  | 190302.8  | 158158.4  |
| 222359.7  | 124870.9  | 189075.1  | 172077.7  | 182168.8  | 108081.9  | 248761.1  | 86953.47  | 234537.5  | 144799.6  |
| 204364.9  | 84738.48  | 191330.3  | 158840.6  | 178024.8  | 100948.2  | 254909.6  | 128028.1  | 145542.5  | 186144.8  |

|           |           |           |           |           |           |           |           |           |           |
|-----------|-----------|-----------|-----------|-----------|-----------|-----------|-----------|-----------|-----------|
| LP401.178 |
| 96013.99  | 159210.3  | 178653.3  | 204390.5  | 145812    | 143497.8  | 118673.9  | 61504.54  | 125728.4  | 153353.9  |
| 119672.7  | 84661.47  | 127060.8  | 173471.6  | 123649.4  | 190931.3  | 89032.54  | 85807.86  | 161377.4  | 148377.3  |
| 106440.7  | 151688.5  | 165143.7  | 166696.7  | 203971.9  | 167783.1  | 104151.7  | 64792.24  | 146347.1  | 113219.4  |
| 81457.62  | 101869.3  | 213521.8  | 278271.1  | 152156.7  | 177821.2  | 124539.2  | 53570.12  | 160825.6  | 109346.8  |
| 99277.82  | 123908.2  | 143517.1  | 204457.4  | 241224.2  | 241471.2  | 172308.1  | 56533.67  | 131539.7  | 162299.4  |

|           |           |           |           |           |           |           |           |           |           |
|-----------|-----------|-----------|-----------|-----------|-----------|-----------|-----------|-----------|-----------|
| LP401.178 |
| 109201.9  | 46275.59  | 95937.8   | 194706.6  | 154879.6  | 126695.7  | 53425.8   | 96560.3   | 158628    | 63000.63  |
| 136380.9  | 48176.69  | 173984.5  | 146328    | 217893.9  | 191459.6  | 67493.28  | 107003.7  | 132197.8  | 55178.45  |
| 101430.7  | 46278.52  | 156585.4  | 168622.5  | 178434.6  | 127778.3  | 58020.74  | 94295.9   | 144054.5  | 42233.08  |
| 147030.3  | 45621.46  | 163525.5  | 213566.4  | 136762.1  | 110808.6  | 48610.6   | 115565.9  | 102461.4  | 42433.23  |
| 94614.24  | 63247.26  | 127830.7  | 174095.6  | 159878.3  | 120365.3  | 55497.42  | 131841.6  | 121757.1  | 62884.08  |

|           |           |           |           |           |           |           |           |           |           |
|-----------|-----------|-----------|-----------|-----------|-----------|-----------|-----------|-----------|-----------|
| LP401.178 |
| 173429.8  | 60731.53  | 186293    | 160150    | 59490.48  | 69176.43  | 55016.37  | 136918.8  | 47097.08  | 58088.59  |
| 182216.4  | 47610.3   | 170401.2  | 208989.3  | 43197.31  | 74657.62  | 48675.26  | 114555.5  | 61178.03  | 61701.91  |
| 161521.2  | 51258.8   | 197736.1  | 167490    | 69491.09  | 59782.15  | 72359.25  | 103800.9  | 47452.73  | 56307.21  |
| 165497.3  | 49050.97  | 134361.2  | 167223.5  | 55446.9   | 70353.22  | 42983.33  | 100282.3  | 47833.8   | 48036.86  |
| 142869.7  | 55974.03  | 239064.4  | 109936.5  | 50085.53  | 64215.68  | 46644.1   | 124269.2  | 66194.19  | 55166.69  |

|           |           |           |           |           |           |           |           |           |           |
|-----------|-----------|-----------|-----------|-----------|-----------|-----------|-----------|-----------|-----------|
| LP401.178 | LP401.215 | LP401.215 |
| 123551    | 152202.8  | 136391.7  | 44119.09  | 139398.4  | 58668.35  | 90444.43  | 183765    | 71209.87  | 57120.3   |
| 156551.7  | 157193.8  | 115527.1  | 52682.52  | 210982.8  | 67742.06  | 82257.34  | 167746.1  | 71580.48  | 29475.1   |
| 131216.4  | 205225.7  | 179074.2  | 40750.48  | 209383.9  | 57402.28  | 59192.85  | 187703.7  | 62277.7   | 54483.63  |
| 168147.1  | 167072.8  | 144399.5  | 37991.32  | 214052.6  | 77676.7   | 68651.79  | 130369.5  | 55525.75  | 51536.63  |
| 138528.7  | 128937    | 115816.5  | 46116.22  | 191186.9  | 69560.45  | 75313.87  | 191989.5  | 61437.45  | 57672.49  |

|           |           |           |           |           |           |           |           |           |           |
|-----------|-----------|-----------|-----------|-----------|-----------|-----------|-----------|-----------|-----------|
| LP401.215 |
| 123187.9  | 86824.25  | 107571.6  | 39021.9   | 52192.7   | 67225.76  | 93345.65  | 147389.9  | 155092.6  | 49344.79  |
| 137221.3  | 86632.43  | 111661.9  | 36166.12  | 40335.68  | 72258.34  | 97182.83  | 149292.7  | 57079.42  | 38493.88  |
| 131159.9  | 75811.61  | 114788.1  | 37805.69  | 38407.6   | 65082.73  | 89152.09  | 141275    | 172847.3  | 38788.66  |
| 128782.5  | 81360.06  | 99297.28  | 35878.68  | 35592.72  | 66806.15  | 92471.04  | 106562.2  | 169888.1  | 32828.57  |
| 88893.7   | 94828.79  | 98932.31  | 39867.98  | 45016.14  | 65113.83  | 98586.04  | 136018.5  | 171361    | 40955.55  |

|           |           |           |           |           |           |           |           |           |           |
|-----------|-----------|-----------|-----------|-----------|-----------|-----------|-----------|-----------|-----------|
| LP401.215 |
| 118107.1  | 98363.3   | 49540.74  | 110594.9  | 42383.97  | 125564.2  | 73033.57  | 103107.8  | 119692    | 176440.4  |
| 117642.1  | 59487.72  | 49337.84  | 109906.5  | 40616.44  | 142026.4  | 81467.39  | 104289.3  | 120881.8  | 178101.1  |
| 128473.8  | 97574.53  | 51059.64  | 105868.9  | 42496.47  | 134388.9  | 75405.51  | 92677     | 121482.2  | 179404.8  |
| 114248.5  | 97285.51  | 45476.93  | 98880.8   | 35853.32  | 137035.1  | 67526.82  | 94483.97  | 117606.6  | 176439.3  |
| 118214.3  | 102918.4  | 36304.19  | 105901.8  | 39601.05  | 136587.5  | 78547.26  | 95277.41  | 132250.3  | 171327.9  |



|           |           |           |           |           |           |           |           |           |           |
|-----------|-----------|-----------|-----------|-----------|-----------|-----------|-----------|-----------|-----------|
| LP401.215 |
| 115570.6  | 182147.1  | 153081.8  | 142188.5  | 184910.8  | 124057.4  | 159105.5  | 86983.38  | 182814.2  | 78412.3   |
| 110079.6  | 169333.5  | 156528.2  | 157922.6  | 175349.9  | 120085.8  | 161903.5  | 96604.52  | 193587    | 59108.01  |
| 108192.5  | 170433.1  | 157541.8  | 163191.7  | 180361.3  | 124557    | 158894.9  | 84375.89  | 168986.7  | 79938.5   |
| 108352.6  | 170900.8  | 153368.3  | 148890.2  | 189407.8  | 132712.4  | 178141.8  | 88868.47  | 183331.3  | 78848.05  |
| 118307.5  | 181359.8  | 160781.3  | 147265.5  | 186199.9  | 127576.4  | 132604.2  | 86707.28  | 173689.8  | 89231.56  |

|           |           |           |           |           |           |           |           |           |           |
|-----------|-----------|-----------|-----------|-----------|-----------|-----------|-----------|-----------|-----------|
| LP401.215 |
| 42244.58  | 128093.2  | 136537.6  | 170623.5  | 120892.6  | 80361.81  | 136690.9  | 155479.7  | 68295.21  | 135670.8  |
| 44850.42  | 129762.7  | 137659.4  | 116699.2  | 127809.9  | 80108.6   | 141855.5  | 154578.2  | 66806.24  | 134049.8  |
| 39281.95  | 138705.4  | 138911.6  | 185791.5  | 126274.8  | 67696.47  | 135153.3  | 148180.6  | 58175.71  | 138562    |
| 39415.04  | 137940    | 137307.4  | 170233.5  | 116885.6  | 78473.05  | 135531.9  | 141382.2  | 61320.24  | 144807.6  |
| 43412.97  | 134987.3  | 134477.6  | 178689.8  | 120352.2  | 76623.17  | 145003.5  | 156594.3  | 67154.27  | 142618.4  |

|           |           |           |           |           |           |           |           |           |           |
|-----------|-----------|-----------|-----------|-----------|-----------|-----------|-----------|-----------|-----------|
| LP401.215 | LP401.214 | LP401.215 | LP401.215 | LP401.215 | LP401.215 | LP401.214 | LP401.215 | LP401.215 | LP401.215 |
| 117602.1  | 117301.7  | 146690.6  | 122445.5  | 184731.6  | 49711.28  | 102306.7  | 215433.9  | 82834.63  | 120091.8  |
| 122161.4  | 111452.7  | 143181    | 106175.4  | 176181.5  | 54801.13  | 103621.7  | 213163.1  | 78523.69  | 123217.6  |
| 118157    | 118835.6  | 128275.2  | 115404.5  | 176481.9  | 49565.45  | 91410.96  | 193176.6  | 78743.69  | 121823.4  |
| 115348.6  | 121827.6  | 132791.4  | 122781.7  | 175036.6  | 44684.74  | 86323.27  | 214001    | 73618.19  | 125459.1  |
| 118713.3  | 122930.8  | 145911.4  | 117325.3  | 172618.3  | 48796.23  | 91824.58  | 210645.2  | 82995.11  | 123676.2  |

|           |           |           |           |           |           |           |           |           |           |
|-----------|-----------|-----------|-----------|-----------|-----------|-----------|-----------|-----------|-----------|
| LP401.215 |
| 85763.48  | 148330.5  | 110376.6  | 142878.8  | 114096.8  | 89127.25  | 123535.9  | 237266.9  | 50838.63  | 57658.21  |
| 86719.7   | 153829    | 117836.5  | 161311.6  | 113949.5  | 81320.91  | 130335.2  | 225105.9  | 49158.09  | 56541.48  |
| 90775.41  | 148217.4  | 109209.5  | 156858.9  | 110946    | 89712.3   | 125983.4  | 249727.8  | 43948.95  | 49767.26  |
| 86864.66  | 93507.57  | 106458.5  | 174333    | 109553.4  | 88895.2   | 127919.5  | 239477.8  | 42119.98  | 44475.46  |
| 90086.46  | 156185.1  | 116984.8  | 162011.1  | 115015.9  | 96647.46  | 124987.4  | 231236.3  | 44642.69  | 51593.21  |

|           |           |           |           |           |           |           |           |           |           |
|-----------|-----------|-----------|-----------|-----------|-----------|-----------|-----------|-----------|-----------|
| LP401.215 | LP401.215 | LP401.215 | LP401.214 | LP401.215 | LP401.214 | LP401.214 | LP401.215 | LP401.215 | LP401.215 |
| 100249.5  | 137236.3  | 123590.1  | 104693.4  | 241731.1  | 91687.04  | 160136.5  | 99985.3   | 156818.2  | 154602.2  |
| 99950.36  | 128777    | 136969.4  | 109872.5  | 230427.7  | 108954.1  | 158317.3  | 104614    | 164330.6  | 164138.5  |
| 100433    | 135808.2  | 116641.7  | 104787.1  | 236030.8  | 109751.9  | 159656.8  | 107384.8  | 168105.4  | 156639.3  |
| 106123.8  | 147351.8  | 113460.9  | 106556.3  | 243812.9  | 102667.3  | 165002.3  | 108859    | 170378.2  | 140503.8  |
| 99109.5   | 129328.1  | 110172.9  | 113674.4  | 252371.8  | 102632.6  | 167775.7  | 110114    | 163571.7  | 150824.9  |

|           |           |           |           |           |           |           |           |           |           |
|-----------|-----------|-----------|-----------|-----------|-----------|-----------|-----------|-----------|-----------|
| LP401.247 | LP401.341 | LP401.345 | LP402.248 |
| 77663.55  | 56658.04  | 41613.39  | 46911.88  | 43753.25  | 38823.56  | 77641.28  | 75758.17  | 57775.12  | 53146.13  |
| 80579.25  | 50207.22  | 43841.77  | 42209.32  | 40256.95  | 30717.91  | 77906.61  | 75482.53  | 49624.37  | 53355.76  |
| 66837.29  | 52593.57  | 37504.81  | 51699.68  | 44793.39  | 38995.3   | 74092.32  | 80382.95  | 54506.13  | 50952.58  |
| 59526.83  | 39052.54  | 36652.74  | 42882.62  | 37853.12  | 38283.68  | 80545.72  | 71048.95  | 55815.76  | 54930.42  |
| 65597.77  | 48826.4   | 32523.46  | 44155.86  | 41590.18  | 29382.09  | 78198.34  | 72385.68  | 53931.97  | 56913.69  |

|           |           |           |           |           |           |           |           |           |           |
|-----------|-----------|-----------|-----------|-----------|-----------|-----------|-----------|-----------|-----------|
| LP402.284 | LP402.284 | LP402.284 | LP402.285 | LP402.284 | LP402.285 | LP402.285 | LP402.284 | LP402.285 | LP402.285 |
| 105752.7  | 100286.1  | 86821.45  | 92163.34  | 58120     | 83597.74  | 89408.25  | 82674.8   | 77259.8   | 67362.29  |
| 78354.42  | 92757.78  | 78658.33  | 90258.84  | 91975.91  | 81084.42  | 76548.55  | 85231.19  | 79490.39  | 61185.49  |
| 119854.9  | 85674.58  | 60200.59  | 122665    | 92006.37  | 147595.1  | 77514.36  | 68963.59  | 73302.02  | 57766.51  |
| 89555.54  | 136534.5  | 76390.3   | 71984.12  | 105284.3  | 85726.07  | 79311.92  | 87371.6   | 56357.38  | 65135.81  |
| 148900.7  | 117233    | 94205.01  | 75446.87  | 65833.87  | 80316.95  | 87327.76  | 85420.56  | 71007.6   | 66257.43  |

|           |           |           |           |           |           |           |           |           |           |
|-----------|-----------|-----------|-----------|-----------|-----------|-----------|-----------|-----------|-----------|
| LP402.285 | LP402.285 | LP402.285 | LP402.284 | LP402.285 | LP402.285 | LP402.285 | LP402.284 | LP402.285 | LP402.285 |
| 93097.81  | 75034.16  | 83977.24  | 74100.98  | 123982.4  | 92536.89  | 122040    | 74679.11  | 60200.92  | 70105.17  |
| 121754.3  | 74799.76  | 84660.79  | 135748.9  | 106065.1  | 92191.02  | 111396.6  | 81444.02  | 64498.01  | 72598.96  |
| 87249.94  | 84978.31  | 80791.39  | 74051.53  | 117366.3  | 93197.74  | 95096.08  | 81759.79  | 69884.14  | 69540.34  |
| 92319.55  | 70569.27  | 71319.15  | 78207.03  | 109446.9  | 88527.93  | 98750.15  | 69456.99  | 58579.69  | 69636.47  |
| 84336.9   | 73104.58  | 86738.52  | 77002.51  | 113158.3  | 93664.85  | 120198.4  | 90364.16  | 77089.88  | 71423.45  |



|           |           |           |           |           |           |           |           |           |           |
|-----------|-----------|-----------|-----------|-----------|-----------|-----------|-----------|-----------|-----------|
| LP402.285 |
| 90052.9   | 85345.88  | 57291.7   | 82481.92  | 88677.93  | 119650.4  | 71039.46  | 95190.62  | 84009.34  | 69570.06  |
| 87222.39  | 54764.71  | 66388.39  | 89786.98  | 88318.44  | 109066.9  | 73966.4   | 73696.83  | 79931.39  | 84846.1   |
| 86929.94  | 64595.07  | 65268.09  | 97058.32  | 87514.46  | 102360.2  | 74621.56  | 74013.22  | 74586.15  | 86888.67  |
| 85901.61  | 53437.73  | 65433.9   | 82597.64  | 83780.05  | 116697.9  | 82574.16  | 76315.15  | 72935.2   | 69656.16  |
| 92675.98  | 55152.5   | 66036.14  | 81251.85  | 85349.04  | 105234.5  | 75284.27  | 73918.44  | 70424.2   | 59068.41  |

|           |           |           |           |           |           |           |           |           |           |
|-----------|-----------|-----------|-----------|-----------|-----------|-----------|-----------|-----------|-----------|
| LP402.285 |
| 83050.25  | 86924.58  | 59639.76  | 84881.11  | 67864.46  | 67497.23  | 83977.94  | 84556.42  | 65325.05  | 79079.04  |
| 85730.63  | 79686.73  | 57939.94  | 75220.16  | 70668.17  | 61831.03  | 82590.6   | 91783.85  | 64544.84  | 85220.68  |
| 78525.67  | 70972.54  | 67432.91  | 77269.92  | 81026.83  | 57327.85  | 82973.54  | 82468.21  | 66065.99  | 90859.77  |
| 83749.82  | 81095.86  | 58541.64  | 73525.28  | 72485.84  | 76651.79  | 86713.85  | 84874.21  | 77017.73  | 76565.08  |
| 83118.24  | 84814.66  | 58156.37  | 80445.39  | 60216.24  | 61274.93  | 76295.08  | 86677.3   | 73046.7   | 87574.16  |

|           |           |           |           |           |           |           |           |           |           |
|-----------|-----------|-----------|-----------|-----------|-----------|-----------|-----------|-----------|-----------|
| LP402.285 | LP402.285 | LP402.285 | LP402.285 | LP402.284 | LP402.285 | LP402.285 | LP402.284 | LP402.285 | LP402.285 |
| 74731.53  | 98296.04  | 48029.07  | 49440.17  | 97745.51  | 118308.5  | 77146.67  | 96771.01  | 79004.11  | 75453.6   |
| 76057.73  | 102992.2  | 48297.36  | 51920.29  | 92115.72  | 117960.2  | 79355.45  | 105684.9  | 80446.98  | 74874.84  |
| 73301.43  | 105226.5  | 54135.42  | 47131.97  | 94579.12  | 122652    | 78947.2   | 105089.9  | 78249.62  | 74506.45  |
| 75993.31  | 101380.1  | 46869.01  | 48417.05  | 107790.5  | 111631.9  | 72636.48  | 100890.1  | 79264.15  | 75974.45  |
| 73030.91  | 98825.08  | 44561     | 52190.51  | 88740.41  | 114396    | 80003.32  | 103272.4  | 77748.86  | 73385.99  |

|           |           |           |           |           |           |           |           |           |           |
|-----------|-----------|-----------|-----------|-----------|-----------|-----------|-----------|-----------|-----------|
| LP402.285 | LP402.285 | LP402.285 | LP402.284 | LP402.285 | LP402.285 | LP402.285 | LP402.285 | LP402.285 | LP402.285 |
| 59129.09  | 59880.34  | 84750.22  | 65589.98  | 63642.42  | 62544.9   | 49154.39  | 74091.69  | 85582.58  | 52591.81  |
| 60039.85  | 59641.45  | 84105.09  | 50781.23  | 64601.06  | 69228.85  | 49583.38  | 71534.45  | 86770.37  | 46687.78  |
| 57598.82  | 55752.11  | 81569.3   | 51231.57  | 55985.6   | 74747.59  | 51597.59  | 71840.07  | 82492.51  | 51019.34  |
| 62217.94  | 60836.96  | 86720.89  | 53057.02  | 67971.16  | 62007.02  | 50480.67  | 68759.1   | 79800.83  | 53793.25  |
| 52716.21  | 55941.49  | 87636.39  | 52783.17  | 55046.02  | 60604.77  | 51446.16  | 66072.77  | 84880.12  | 44930.13  |

|           |           |           |           |           |           |           |           |           |           |
|-----------|-----------|-----------|-----------|-----------|-----------|-----------|-----------|-----------|-----------|
| LP402.358 | LP403.193 | LP403.194 | LP403.194 | LP403.194 | LP403.193 | LP403.194 | LP403.194 | LP403.193 | LP403.194 |
| 98900.28  | 351500.2  | 250367.6  | 201914.1  | 232500.1  | 240111.5  | 347039.7  | 457976.2  | 222143.8  | 437655.3  |
| 104902.9  | 280945.1  | 218320    | 244211.9  | 231815.5  | 221028.3  | 284101.8  | 347177.5  | 234467.6  | 237356.5  |
| 107098.6  | 331757    | 223041    | 156274.1  | 176863.1  | 285543.7  | 345697.6  | 365870.9  | 193756.7  | 248720.8  |
| 91724.93  | 372819    | 188546.3  | 288552.6  | 208014.3  | 202949    | 392984.4  | 349433.2  | 255434.3  | 339419.8  |
| 99720.21  | 297978.5  | 236854.9  | 217235.2  | 216904.3  | 345935.7  | 363663.5  | 425790.7  | 243442.2  | 360769.4  |

|           |           |           |           |           |           |           |           |           |           |
|-----------|-----------|-----------|-----------|-----------|-----------|-----------|-----------|-----------|-----------|
| LP403.194 | LP403.193 | LP403.193 | LP403.194 | LP403.194 | LP403.194 | LP403.193 | LP403.194 | LP403.194 | LP403.194 |
| 427321.6  | 261143.6  | 228835.8  | 349472.8  | 318424.3  | 182251    | 328990.2  | 234891.6  | 272904.3  | 481991.4  |
| 256761.2  | 265249.6  | 352874.2  | 498724.9  | 378591.6  | 221790.4  | 336384.9  | 186056.1  | 274785.1  | 260926    |
| 340687.9  | 257643.5  | 336577    | 350708.2  | 413862.7  | 234749.6  | 435627.7  | 333452.5  | 249392.3  | 345808.6  |
| 254265    | 263010.2  | 384248.9  | 396963.4  | 510857.8  | 205790.5  | 279216.3  | 221315.8  | 222900.9  | 331791.4  |
| 351776.4  | 299890.4  | 265386.6  | 358149.2  | 246202.6  | 215315.4  | 316252.6  | 370019.4  | 245684.9  | 345581.3  |

|           |           |           |           |           |           |           |           |           |           |
|-----------|-----------|-----------|-----------|-----------|-----------|-----------|-----------|-----------|-----------|
| LP403.194 | LP403.194 | LP403.194 | LP403.193 | LP403.194 | LP403.194 | LP403.194 | LP403.194 | LP403.194 | LP403.194 |
| 299703.6  | 461429.8  | 352759.6  | 199345.7  | 325822    | 266942.8  | 148753.1  | 315370.2  | 210809.6  | 335838.2  |
| 258120.7  | 308776.7  | 390933.1  | 233934.3  | 389186.4  | 370118.7  | 183935.3  | 295534.9  | 262317.1  | 421760.1  |
| 297644.9  | 305199.6  | 328378.3  | 217292.6  | 282435.1  | 272178.8  | 176079.9  | 312137.7  | 219693.7  | 404444.4  |
| 293227.5  | 499762.8  | 390079.4  | 177498.8  | 406421.2  | 312725.6  | 231182.7  | 445299.2  | 239016.9  | 319881.3  |
| 227204.1  | 359662.1  | 382061.5  | 200863.9  | 346898.8  | 291314    | 152267.6  | 292324.2  | 276228.2  | 415329.4  |

|           |           |           |           |           |           |           |           |           |           |
|-----------|-----------|-----------|-----------|-----------|-----------|-----------|-----------|-----------|-----------|
| LP403.194 |
| 339232.7  | 488364.7  | 362385.4  | 317379.8  | 361851.1  | 305956.9  | 388187.6  | 199882.9  | 81767.85  | 270394.4  |
| 276117.8  | 323276.9  | 329162.2  | 253152.8  | 236006.6  | 293960.2  | 300798.7  | 216498.2  | 65856.68  | 276199.4  |
| 376903.7  | 395033    | 267487.4  | 223839    | 352252.4  | 363653.2  | 343618.2  | 198073.6  | 64260.18  | 259294.4  |
| 344863.8  | 424594.2  | 306281.3  | 227728.8  | 337194.3  | 367766.5  | 395635.5  | 204939.1  | 89810.41  | 443156.8  |
| 344614.8  | 414962.6  | 324812.8  | 234303.2  | 348910.8  | 290914    | 597107.4  | 183573.6  | 50509.36  | 311515.9  |



|           |           |           |           |           |           |           |           |           |           |
|-----------|-----------|-----------|-----------|-----------|-----------|-----------|-----------|-----------|-----------|
| LP403.194 |
| 364242.3  | 160842.5  | 319052.5  | 405990.1  | 173888.3  | 291503.4  | 353629.9  | 195370.5  | 213231.8  | 251669.1  |
| 288651.8  | 151108.7  | 260746    | 245953.6  | 319027.6  | 248488.9  | 469134.9  | 181023.2  | 214561.1  | 256549.3  |
| 313053.4  | 183302.4  | 472446.9  | 364503.2  | 217879.8  | 310659    | 488391.9  | 153534.8  | 232617.3  | 217122.1  |
| 292808.1  | 149381.3  | 417115.7  | 361952.9  | 149239    | 278183    | 338636    | 194548.5  | 210394.8  | 292957.5  |
| 287622.5  | 188563.1  | 235646.4  | 289443    | 131081.1  | 367168.3  | 381043.6  | 224583.9  | 214835.9  | 296149.3  |

|           |           |           |           |           |           |           |           |           |           |
|-----------|-----------|-----------|-----------|-----------|-----------|-----------|-----------|-----------|-----------|
| LP403.194 |
| 233952.7  | 314621.1  | 158849.2  | 229273.7  | 169416.2  | 231944.2  | 184239    | 304501.2  | 212438.4  | 162890.2  |
| 236588.8  | 256739.6  | 255880.6  | 250947.3  | 163845.5  | 232761.1  | 229231.4  | 309705.9  | 244916.9  | 174722.7  |
| 308420    | 408044    | 218749.3  | 375536.2  | 127354.7  | 245710.6  | 192200.7  | 275364.7  | 253419.6  | 229715.5  |
| 264375.8  | 234411.7  | 215699    | 187056.6  | 143488.9  | 217545.1  | 283122.4  | 239066.8  | 246728.6  | 139868.5  |
| 226601.7  | 296808.4  | 173747.1  | 317859.8  | 183494.6  | 216335.3  | 252977.2  | 323113.5  | 264234.9  | 202492.1  |

|           |           |           |           |           |           |           |           |           |           |
|-----------|-----------|-----------|-----------|-----------|-----------|-----------|-----------|-----------|-----------|
| LP403.194 |
| 220638.8  | 293592.3  | 151466.8  | 124165.9  | 155459.8  | 253836.4  | 163009.6  | 189006.7  | 173582.4  | 158765.9  |
| 203745.3  | 326200    | 173029.4  | 121105.8  | 177289.7  | 280054.5  | 174490.8  | 212977.6  | 169820.1  | 163701.6  |
| 196495.2  | 308181.3  | 145163.1  | 132252.9  | 255612.2  | 188994.5  | 167508.6  | 185476.8  | 154024.1  | 184839.3  |
| 217842.4  | 353978.3  | 126373.1  | 149475.8  | 187050.2  | 286653.8  | 236067.8  | 160099.1  | 160150.3  | 169473.2  |
| 252008.9  | 302416.7  | 205989.7  | 119298.3  | 171161.3  | 264490.6  | 162192.1  | 191704.3  | 172793.9  | 176185    |

|           |           |           |           |           |           |           |           |           |           |
|-----------|-----------|-----------|-----------|-----------|-----------|-----------|-----------|-----------|-----------|
| LP403.194 |
| 91700.58  | 84820.72  | 89303.16  | 71049.54  | 71229.1   | 201472.9  | 58228.52  | 93157.69  | 57420.92  | 83946.16  |
| 104639.1  | 77525.26  | 62696.73  | 56890.23  | 71406.16  | 203219.2  | 59574.68  | 83135.53  | 62374.27  | 93876.03  |
| 88132.54  | 96411.34  | 60537.67  | 86930.57  | 63455.31  | 193602.1  | 53030.94  | 98183.1   | 65569.54  | 84470.07  |
| 56412.08  | 75951.47  | 91351.06  | 52878.53  | 58339.92  | 142999.9  | 68476.55  | 65178.48  | 48736.12  | 73151.29  |
| 79856.44  | 94041.64  | 81240.39  | 70994.6   | 64591.67  | 211238.5  | 58409.86  | 92219.42  | 51330.87  | 79591.48  |

|           |           |           |           |           |           |           |           |           |           |
|-----------|-----------|-----------|-----------|-----------|-----------|-----------|-----------|-----------|-----------|
| LP403.194 | LP403.194 | LP403.232 | LP403.278 | LP403.354 | LP403.353 | LP403.353 | LP403.353 | LP404.197 | LP404.197 |
| 87463.89  | 70552.41  | 80571.72  | 15425.32  | 37916.1   | 57933.14  | 53510.58  | 44715.01  | 45023.37  | 63443.85  |
| 93565.34  | 75380.78  | 119969.1  | 15327.27  | 39774.78  | 53896.72  | 50745.92  | 42699.86  | 38106.33  | 53271.43  |
| 103607.3  | 67492.05  | 99435.24  | 17653.65  | 37897.71  | 53339.53  | 46809.59  | 41876.58  | 40202.54  | 55826.69  |
| 84486.57  | 56214.36  | 106732    | 16236.25  | 41215.43  | 56422.77  | 48538.97  | 39576.24  | 45003     | 64256.82  |
| 78426.05  | 104610.1  | 78562.54  | 17114.21  | 40514.44  | 59817.79  | 49885.84  | 36082.79  | 50324.19  | 54260.24  |

|           |           |           |           |           |           |           |           |           |           |
|-----------|-----------|-----------|-----------|-----------|-----------|-----------|-----------|-----------|-----------|
| LP404.197 | LP404.197 | LP404.197 | LP404.198 | LP404.209 | LP404.263 | LP404.264 | LP404.264 | LP404.264 | LP404.264 |
| 56664.98  | 45449.93  | 38999.27  | 36707.96  | 36962.48  | 142167.7  | 112636.5  | 99421.28  | 130529.7  | 120657.2  |
| 59198.86  | 48562.99  | 50410.6   | 32876.11  | 22567.86  | 130080.8  | 112528.1  | 150725.6  | 115622.5  | 125312    |
| 56910.37  | 49221.81  | 49547.31  | 32520.73  | 35285.6   | 112507.8  | 117078.4  | 131409.7  | 130574.8  | 129873.5  |
| 54414.48  | 40713.96  | 47524.16  | 35454.78  | 25094.81  | 126023.3  | 113924.8  | 124625    | 142052.6  | 153962.1  |
| 60396.34  | 48129.76  | 47034.44  | 32802.57  | 33392.94  | 154417.1  | 120133.7  | 90756.72  | 115540.9  | 122281.1  |

|           |           |           |           |           |           |           |           |           |           |
|-----------|-----------|-----------|-----------|-----------|-----------|-----------|-----------|-----------|-----------|
| LP404.264 |
| 142382.4  | 87249.84  | 105055.8  | 96237.5   | 126283.2  | 116595.4  | 118711.1  | 96538.77  | 113724.6  | 99127.21  |
| 110318.6  | 79196.37  | 98543.45  | 104491.5  | 132081.6  | 107876.6  | 108005.3  | 82363.98  | 110388.6  | 93333.78  |
| 115115.6  | 90927.93  | 124075.4  | 102738.7  | 106740.2  | 114553.6  | 74930.67  | 84232.67  | 110740.1  | 128661.8  |
| 100684.6  | 85129.21  | 104017    | 98350.84  | 161573.9  | 152742.7  | 85111.43  | 91898.16  | 111745.9  | 109277.5  |
| 104271.5  | 76830.68  | 98846.87  | 96086.42  | 139631.4  | 105129.8  | 73710.15  | 82897.58  | 116641.7  | 91267.27  |

|           |           |           |           |           |           |           |           |           |           |
|-----------|-----------|-----------|-----------|-----------|-----------|-----------|-----------|-----------|-----------|
| LP404.264 |
| 119659.7  | 114089.7  | 104628.1  | 126270.6  | 100209.2  | 74339     | 84540.25  | 115018.2  | 98652.56  | 103772.5  |
| 106143.3  | 105407.7  | 98734.67  | 103916.5  | 108299.6  | 74050.15  | 88523.46  | 115745.5  | 97684.49  | 97235.55  |
| 109805.9  | 106892.2  | 99846.45  | 122077.1  | 105027.9  | 85940.35  | 92444.01  | 106174.2  | 84954.2   | 102980.2  |
| 117765.6  | 107102.6  | 96345.72  | 106379.7  | 108216.1  | 71258.15  | 83093.96  | 94685.98  | 81207.9   | 102844.4  |
| 106753    | 103056.8  | 98947.84  | 112621.7  | 105772.5  | 75518.23  | 97120.53  | 132062    | 93258.61  | 98964.02  |



|           |           |           |           |           |           |           |           |           |           |
|-----------|-----------|-----------|-----------|-----------|-----------|-----------|-----------|-----------|-----------|
| LP404.264 |
| 85664.65  | 102031.8  | 96525.89  | 82813.86  | 108270.9  | 96565.9   | 86864.41  | 65790.62  | 75763.27  | 95719.49  |
| 84244.58  | 126629    | 96878.69  | 83960.21  | 103437.2  | 100761.9  | 88337.85  | 73674.66  | 79111.68  | 98290.8   |
| 84890.79  | 106925.6  | 95003.3   | 83594.22  | 101174.7  | 86415.32  | 90740.98  | 65571.75  | 75400.19  | 104277.2  |
| 91746.36  | 110246.6  | 80442.87  | 77213.83  | 99163.26  | 98432.31  | 86971.92  | 72644.76  | 73375.4   | 105997.3  |
| 94008.24  | 111175.2  | 88602.31  | 84413.76  | 99386.22  | 96566.92  | 89419.1   | 64955.45  | 67597.04  | 91233.37  |

|           |           |           |           |           |           |           |           |           |           |
|-----------|-----------|-----------|-----------|-----------|-----------|-----------|-----------|-----------|-----------|
| LP404.264 | LP404.265 | LP404.264 | LP404.264 |
| 99300.69  | 99142.94  | 110569.9  | 82779.67  | 101409.9  | 114971.6  | 87232.02  | 98116.82  | 114865.1  | 90510.83  |
| 103452.7  | 93658.44  | 115214.8  | 79281.2   | 98624.16  | 106464.5  | 87862.06  | 102176.6  | 123492.8  | 81143.84  |
| 109540.8  | 108770.7  | 111575.2  | 79087.72  | 100466.8  | 120565.6  | 92149.78  | 96110.81  | 122919.9  | 75909.23  |
| 101280.1  | 109375.1  | 107446.7  | 81277.14  | 101398.9  | 78857.15  | 89544.68  | 97390.67  | 124400.7  | 83116.72  |
| 92965.23  | 99297.42  | 99406.04  | 79810.44  | 91194.96  | 117194.3  | 89735.38  | 107901.6  | 120251.6  | 84610.34  |

|           |           |           |           |           |           |           |           |           |           |
|-----------|-----------|-----------|-----------|-----------|-----------|-----------|-----------|-----------|-----------|
| LP404.300 | LP404.301 | LP404.300 | LP404.300 |
| 128444.9  | 116901.2  | 121925.7  | 137672.2  | 103055.3  | 111506.6  | 139292.7  | 126303.3  | 170795.7  | 115447.3  |
| 114675.2  | 100562.3  | 115867.2  | 97903.94  | 94086.17  | 81007.83  | 105443.1  | 129838.6  | 89148.06  | 85121.94  |
| 139004.7  | 107923.3  | 121881.4  | 129093.5  | 93589.58  | 133124.9  | 131792.3  | 133317.5  | 129797.7  | 114467.2  |
| 117073.6  | 105930.7  | 119906.6  | 121686.4  | 79431.02  | 123665.7  | 142156.8  | 127279.7  | 117321.8  | 100402.5  |
| 103241.3  | 114490.6  | 105978.4  | 119325.8  | 91597.69  | 111236.5  | 101992.3  | 84877.17  | 131612.4  | 103703.1  |

|           |           |           |           |           |           |           |           |           |           |
|-----------|-----------|-----------|-----------|-----------|-----------|-----------|-----------|-----------|-----------|
| LP404.300 | LP404.301 | LP404.300 | LP404.301 |
| 104937.8  | 142447.6  | 80993.41  | 134605.7  | 81787.03  | 116500.8  | 70991.12  | 125682.7  | 88631.17  | 81457.24  |
| 83960.11  | 83692.65  | 72790.25  | 123688.7  | 94906.22  | 120555.1  | 99055     | 92712.21  | 97006.24  | 88347.15  |
| 116832.5  | 149303.9  | 104746.2  | 103495.5  | 105762.2  | 101185.2  | 109459.9  | 95424.28  | 94995.54  | 77191.09  |
| 126353.1  | 148227.2  | 101502.2  | 129668.9  | 114650.2  | 131826.2  | 123675.1  | 88806.69  | 85029.54  | 80857.84  |
| 126949.8  | 149373.8  | 68316.62  | 115086.5  | 89676.61  | 116412.7  | 116294.2  | 96828.21  | 108995.6  | 78976.36  |

|           |           |           |           |           |           |           |           |           |           |
|-----------|-----------|-----------|-----------|-----------|-----------|-----------|-----------|-----------|-----------|
| LP404.301 | LP404.300 | LP404.300 | LP404.300 | LP404.300 | LP404.300 | LP404.301 | LP404.300 | LP404.300 | LP404.301 |
| 82271.03  | 87202.63  | 67345.5   | 95824.69  | 95697.33  | 92700.87  | 111754.4  | 67265.43  | 91422.65  | 107201.5  |
| 74698.62  | 93444.44  | 78307.52  | 96031.8   | 154004.7  | 101159    | 69556.39  | 59419.86  | 79989.09  | 116893    |
| 83536.9   | 95923.61  | 79440.89  | 105151.8  | 108596.2  | 64790.54  | 118310.4  | 64314.42  | 92674.6   | 132610.6  |
| 81030.21  | 96297.8   | 87786.08  | 119903.2  | 123654.4  | 99315.15  | 120494.6  | 65527.35  | 89722.97  | 125364.5  |
| 84864.4   | 69688.62  | 81305.93  | 89974.69  | 132098.4  | 94474.61  | 99303.32  | 60289.58  | 90908.89  | 120174.9  |

|            |            |            |            |            |            |            |            |            |            |
|------------|------------|------------|------------|------------|------------|------------|------------|------------|------------|
| LP404.300' | LP404.300' | LP404.301' | LP404.301' | LP404.300' | LP404.300' | LP404.300' | LP404.301' | LP404.301' | LP404.300' |
| 89869.08   | 120953.4   | 78161.3    | 132243.3   | 99367.53   | 132691.4   | 116281.7   | 74939.59   | 72771.1    | 72733.8    |
| 74277.9    | 84067.34   | 68739.02   | 79324.53   | 89658.4    | 122006.4   | 120837.3   | 75556.8    | 91050.33   | 69959.45   |
| 80858.81   | 78781      | 85040.64   | 134281.9   | 99100.3    | 137742.3   | 115560.3   | 73526.77   | 82726.71   | 78150.17   |
| 77941.92   | 98183.54   | 91113.19   | 141286     | 94628.05   | 134046.8   | 117992.3   | 65631.57   | 90428.42   | 70970.97   |
| 91558.5    | 88348.75   | 93491.98   | 121181.1   | 64530.41   | 103278.8   | 136135     | 77877.72   | 93290.15   | 76179.61   |

|           |           |           |           |           |           |           |           |           |           |
|-----------|-----------|-----------|-----------|-----------|-----------|-----------|-----------|-----------|-----------|
| LP404.301 | LP404.301 | LP404.300 | LP404.300 | LP404.300 | LP404.301 | LP404.301 | LP404.300 | LP404.300 | LP404.300 |
| 94998.32  | 64776.95  | 85662.02  | 103273.2  | 86850.91  | 80265.7   | 69684.67  | 68664.96  | 113992.7  | 144594.7  |
| 71009.14  | 51162.04  | 65445.28  | 76195.83  | 58929.63  | 62718.06  | 58192.97  | 60474.11  | 87205.76  | 78913.64  |
| 101849.4  | 64496.04  | 84444.01  | 106036.2  | 91951.42  | 81056.56  | 84142.52  | 70866     | 119700.5  | 131653    |
| 99748.36  | 54417.29  | 89262.94  | 95948.25  | 99602.63  | 83039.81  | 82550.94  | 65690.09  | 118642.8  | 126860.6  |
| 96420.12  | 91787.98  | 76334.75  | 101622.3  | 69118.56  | 85036.44  | 36938.8   | 69453.99  | 85317.32  | 139688.7  |

|            |            |            |            |            |            |            |            |            |            |
|------------|------------|------------|------------|------------|------------|------------|------------|------------|------------|
| LP404.300' | LP404.301' | LP404.300' | LP404.300' |
| 82522.14   | 113880.3   | 77912.9    | 61299.54   | 117367.7   | 112104.5   | 123145.7   | 114151.1   | 112698.7   | 71891.62   |
| 55474.96   | 96156.66   | 51837.97   | 35300.18   | 110763.4   | 49580.02   | 94744.7    | 119238.9   | 89847.26   | 62839.24   |
| 86477.14   | 122208.2   | 79522.09   | 65490.24   | 121389.7   | 60280.73   | 134032     | 67015.9    | 107038.7   | 70717.12   |
| 80865.29   | 106568.2   | 71499.09   | 63937.39   | 121305.1   | 112524.2   | 136091.3   | 113401.1   | 102386.3   | 73263.31   |
| 81056.7    | 103035.9   | 75031.18   | 67776.73   | 107365.2   | 117296.9   | 58062.47   | 112401     | 97404.8    | 67892.83   |



|            |           |           |            |            |           |            |           |            |           |
|------------|-----------|-----------|------------|------------|-----------|------------|-----------|------------|-----------|
| LP404.300' | LP404.301 | LP404.301 | LP404.300' | LP404.300' | LP404.301 | LP404.300' | LP404.301 | LP404.300' | LP404.301 |
| 67128.19   | 88116.8   | 80977.9   | 84493.93   | 87097.59   | 102137    | 61740.38   | 74340.91  | 106757.1   | 85010.13  |
| 54268.69   | 67268.53  | 53514.45  | 43373.37   | 74919.4    | 93821.83  | 55089.92   | 45542.75  | 94278.45   | 85468.99  |
| 68969.52   | 97149.97  | 94143.67  | 90902.83   | 86224.76   | 102762.7  | 73749.28   | 80305.5   | 106199.7   | 82006.67  |
| 63257.62   | 84189.33  | 79363.82  | 95624.51   | 88965.85   | 104017.5  | 64073.67   | 84305.34  | 105964.3   | 77368.21  |
| 60881.58   | 84503.98  | 84626.62  | 81799.27   | 83644.13   | 98498.41  | 67876.88   | 73997.45  | 97157.47   | 75504.52  |

|           |           |           |           |           |           |           |           |           |           |
|-----------|-----------|-----------|-----------|-----------|-----------|-----------|-----------|-----------|-----------|
| LP404.300 | LP404.300 | LP404.301 | LP404.300 | LP404.301 | LP404.301 | LP404.300 | LP404.337 | LP404.337 | LP404.373 |
| 97383.48  | 117043    | 107458.7  | 98759.91  | 115183.9  | 71813.03  | 87610.75  | 127384.9  | 122781.9  | 219260.2  |
| 102111.5  | 67822.29  | 60496.6   | 94255.12  | 65994.23  | 52265.09  | 58274.98  | 135853.5  | 120995.6  | 232691.9  |
| 99832.2   | 120012    | 102667.5  | 102153.4  | 116330.7  | 76055.48  | 92162.18  | 132171.1  | 117949.2  | 260164.9  |
| 101255    | 115400.1  | 104759.2  | 101199    | 114866.1  | 73763.05  | 92954.44  | 132655.4  | 119212.7  | 266961.5  |
| 95613.64  | 116877.9  | 97988.65  | 92965.23  | 112504.1  | 78415.45  | 87962.27  | 125439.4  | 115142.4  | 273627.8  |

|           |           |           |           |           |           |           |           |           |           |
|-----------|-----------|-----------|-----------|-----------|-----------|-----------|-----------|-----------|-----------|
| LP404.373 | LP404.373 | LP404.373 | LP404.386 | LP404.451 | LP405.210 | LP405.211 | LP405.209 | LP405.279 | LP405.301 |
| 58505.74  | 60630.38  | 142846.4  | 22071.11  | 40854.55  | 25935.38  | 30525.43  | 11377.32  | 49801.34  | 38499.32  |
| 56659.93  | 69171.62  | 146430.2  | 26516.24  | 46384.74  | 33291.23  | 30632.52  | 14402.92  | 48923.44  | 43029.18  |
| 60946.14  | 74458.55  | 137154.2  | 24219.33  | 42702.9   | 28665.91  | 35907.55  | 13555.13  | 63381.6   | 40836.19  |
| 62471.5   | 74383.55  | 127896.3  | 21144.34  | 30192.6   | 30166.22  | 25346.6   | 14043.4   | 20433.1   | 34042.56  |
| 59941.36  | 69238.03  | 127390.7  | 25210.88  | 34977.46  | 30683.2   | 21261.01  | 13738.84  | 61381.83  | 36338.79  |

|           |           |           |           |           |           |           |           |           |           |
|-----------|-----------|-----------|-----------|-----------|-----------|-----------|-----------|-----------|-----------|
| LP405.301 | LP405.302 | LP405.301 | LP405.335 | LP406.243 | LP406.243 | LP406.243 | LP406.243 | LP406.244 | LP406.243 |
| 48122.45  | 37012.29  | 35984.02  | 40099.74  | 79060.61  | 75030.68  | 90127.65  | 69203.67  | 60730.35  | 62656.67  |
| 48304.29  | 41415.31  | 45019.46  | 40154.22  | 81432.89  | 67628.9   | 97477.75  | 75924.44  | 54421.08  | 58053.09  |
| 46387.76  | 36822.92  | 38223.66  | 39538.07  | 77082.71  | 72559.97  | 88757.09  | 64516.16  | 56571.75  | 56373.87  |
| 46547.6   | 34954.74  | 40566.76  | 36483.18  | 76760.06  | 74331.07  | 92365.9   | 71780.91  | 54525.53  | 66670.32  |
| 45195.26  | 40862.22  | 40521.8   | 37172.1   | 74763.6   | 83938.03  | 88769.44  | 66572.96  | 56509.15  | 54844.34  |

|           |           |           |           |           |           |           |           |           |           |
|-----------|-----------|-----------|-----------|-----------|-----------|-----------|-----------|-----------|-----------|
| LP406.243 | LP406.244 | LP406.244 | LP406.243 | LP406.279 | LP406.279 | LP406.280 | LP406.280 | LP406.280 | LP406.280 |
| 82621.9   | 72309.7   | 47960.87  | 73060.24  | 277214.1  | 247293.9  | 269847.2  | 207543.3  | 197404    | 195725.3  |
| 83078.27  | 67886.22  | 48058.22  | 69288.03  | 242816.7  | 320279.1  | 215812.9  | 204974.4  | 208378.2  | 297068.3  |
| 85901.32  | 73003.34  | 57446.82  | 69377.33  | 227020.5  | 252824.6  | 325820.3  | 201688.7  | 191695.5  | 234142.9  |
| 80008.55  | 67174.38  | 52795.03  | 67570.23  | 223542.3  | 330426.3  | 186371.5  | 299323.2  | 207788.4  | 306628.3  |
| 74888.89  | 65866.17  | 55815.07  | 62624.91  | 256442.8  | 371904.7  | 334886.9  | 207956.8  | 261113.3  | 232624.9  |

|            |           |           |           |           |           |           |           |           |           |
|------------|-----------|-----------|-----------|-----------|-----------|-----------|-----------|-----------|-----------|
| LP406.28_! | LP406.280 | LP406.280 | LP406.279 | LP406.280 | LP406.280 | LP406.280 | LP406.280 | LP406.280 | LP406.280 |
| 243758.1   | 235814.5  | 269070.7  | 203338.5  | 210320.3  | 199471.8  | 116624.9  | 198196.3  | 240441.5  | 201647.6  |
| 194261.6   | 196528.1  | 278498.5  | 173649.4  | 175866    | 232069.4  | 157553.3  | 271885.6  | 306383.7  | 193246.5  |
| 229541.7   | 220214.8  | 231544.9  | 200105.6  | 200390.5  | 197447    | 163747.4  | 199726.8  | 211621.4  | 222466.6  |
| 259566.4   | 202962.5  | 278837.5  | 206451.4  | 165285.2  | 208238.4  | 159223.3  | 243208.4  | 285734.2  | 275561.3  |
| 219717.3   | 225049.6  | 287687.5  | 204397.2  | 166492.9  | 225791.3  | 145419.5  | 223415.1  | 210401.9  | 260101.7  |

|           |           |           |           |           |           |           |           |           |           |           |
|-----------|-----------|-----------|-----------|-----------|-----------|-----------|-----------|-----------|-----------|-----------|
| LP406.279 | LP406.280 |
| 254868.9  | 220790.1  | 232457.6  | 235019.9  | 201699.2  | 188645.4  | 239028.4  | 210168.4  | 151677.9  | 252482    |           |
| 195200.7  | 220813    | 212624.1  | 222636.2  | 222885.5  | 204288.6  | 246254.1  | 259648.6  | 165944.9  | 235417    |           |
| 250739.6  | 185415.5  | 253975.7  | 299038.7  | 200957.3  | 179858    | 184726.4  | 203302.9  | 167257.4  | 211690.8  |           |
| 218568.8  | 242427    | 219081.4  | 231982.6  | 207807.8  | 251650.2  | 205179.1  | 206572.3  | 168778.8  | 247456.7  |           |
| 245162    | 229360.3  | 230224.2  | 243790.5  | 228223.4  | 187008.8  | 306826.2  | 233251.6  | 168308.7  | 249278.4  |           |

|           |           |           |           |           |           |           |           |           |           |
|-----------|-----------|-----------|-----------|-----------|-----------|-----------|-----------|-----------|-----------|
| LP406.280 |
| 305442    | 279447.5  | 203314.2  | 244882.6  | 239152.8  | 237348.4  | 256181.2  | 180616    | 214911.7  | 167585.3  |
| 267579.4  | 246325.4  | 194257.2  | 331475.9  | 240468.5  | 238926.2  | 281583    | 207936.6  | 223780.4  | 183637.3  |
| 201337.5  | 260625.7  | 205146.5  | 216499.8  | 230106.7  | 261495.7  | 195513.3  | 229370.9  | 288157.7  | 186394.9  |
| 286836.4  | 274981.4  | 188103.9  | 249111.9  | 243611.8  | 245347.3  | 258672.4  | 256501.6  | 201417.4  | 234716.9  |
| 217748.9  | 259152.5  | 273265.4  | 203011.6  | 248884.7  | 255356.7  | 167549.9  | 212129.6  | 188603.4  | 280815.8  |



|           |           |           |           |           |           |           |           |           |           |
|-----------|-----------|-----------|-----------|-----------|-----------|-----------|-----------|-----------|-----------|
| LP406.280 |
| 216306.9  | 217956.1  | 209553.6  | 188399.9  | 220457.3  | 224439.7  | 220514.3  | 216483.9  | 204292.9  | 208472.9  |
| 182949    | 215414.3  | 248857.8  | 199910.8  | 238916    | 240630.3  | 184302.3  | 211294.2  | 187525.2  | 239032.6  |
| 190364.5  | 258334.3  | 215870.6  | 205128.8  | 215448.4  | 210780.5  | 244585.8  | 234119.5  | 193490.6  | 192936.4  |
| 131179.8  | 188366.6  | 202500    | 211038    | 211428.1  | 233081.9  | 202844.9  | 198690.9  | 172797.8  | 183877.1  |
| 168687.5  | 249206.4  | 187622.2  | 211995.1  | 253317    | 276480    | 180478.7  | 201950.2  | 204318    | 214380.2  |

|           |           |           |           |           |           |           |           |           |           |
|-----------|-----------|-----------|-----------|-----------|-----------|-----------|-----------|-----------|-----------|
| LP406.280 |
| 181650.5  | 236988.8  | 264352.6  | 211047.3  | 252888.2  | 228172.9  | 218635.4  | 166527.8  | 186801.3  | 255505.6  |
| 191204    | 222619.1  | 225164.1  | 214948.6  | 255945.4  | 285348.6  | 230720.9  | 209403.7  | 208771.5  | 248077.5  |
| 210871.4  | 198746    | 232178.5  | 211818.7  | 235906.2  | 344871.3  | 198060.8  | 142439.1  | 232868.1  | 247550.1  |
| 214752.3  | 214170.8  | 202961.8  | 207621.3  | 479991.3  | 298054.8  | 218682.7  | 203252.2  | 175249.7  | 250358.4  |
| 187086.1  | 215910.8  | 221068.6  | 315382    | 243269.5  | 268865.3  | 252541.7  | 234943.5  | 212642.5  | 214234.8  |

|           |           |           |           |           |           |           |           |           |           |
|-----------|-----------|-----------|-----------|-----------|-----------|-----------|-----------|-----------|-----------|
| LP406.280 |
| 225989    | 204501.3  | 211168    | 360021.2  | 132456.4  | 208275.4  | 159897.6  | 221941.4  | 248926.8  | 187348.7  |
| 242130    | 202226.2  | 205588    | 202427.6  | 135465.2  | 208407.2  | 158200    | 244544.1  | 220241    | 179725.3  |
| 243287.9  | 229169    | 196627.7  | 244862.1  | 112549.6  | 231705    | 167649    | 169520.5  | 227374.4  | 178333.8  |
| 235025.5  | 254166.6  | 209158.3  | 230261.5  | 133402.7  | 231810.5  | 151014.5  | 232520    | 182845.1  | 174943.7  |
| 203313    | 213188    | 239497.5  | 211966    | 148495.6  | 228121.9  | 139407.6  | 267266.8  | 210033.3  | 168132.3  |

|           |           |           |           |           |           |           |           |           |           |
|-----------|-----------|-----------|-----------|-----------|-----------|-----------|-----------|-----------|-----------|
| LP406.280 |
| 317862.6  | 227647.1  | 331080.7  | 208491.6  | 196839    | 129093.3  | 205109    | 126132.6  | 190746.7  | 143546    |
| 143331.2  | 229737    | 212741.6  | 181295    | 180077.4  | 141240.9  | 185500.4  | 134586.1  | 186456.3  | 109531.3  |
| 200938.6  | 228675.4  | 229519.1  | 327746.7  | 220421.8  | 161992    | 329037.5  | 121535.9  | 188386.3  | 128139.5  |
| 176703.6  | 230475.6  | 190883    | 192454.5  | 198078.2  | 163191.1  | 202455.2  | 121378.5  | 200810.2  | 92877.66  |
| 203545.8  | 161585.6  | 180845.9  | 210094.3  | 194768    | 149233.4  | 168708.2  | 173180.1  | 217820.4  | 96076.8   |

|           |           |           |           |           |           |           |           |           |           |
|-----------|-----------|-----------|-----------|-----------|-----------|-----------|-----------|-----------|-----------|
| LP406.280 | LP406.280 | LP406.280 | LP406.280 | LP406.280 | LP406.317 | LP406.317 | LP406.317 | LP406.317 | LP406.317 |
| 153431.6  | 131445.4  | 117652.7  | 161281.3  | 125172.9  | 182710.2  | 202909.8  | 142513.3  | 202344.2  | 198565.8  |
| 121614.7  | 119514.1  | 119166.5  | 199303.6  | 117571.7  | 174265.7  | 200738.1  | 150847.9  | 193664.1  | 197481.3  |
| 144544.4  | 127347.6  | 124501.4  | 151184.9  | 127028.6  | 182143.4  | 183854.3  | 130652    | 184815.3  | 198074.2  |
| 108655.9  | 126460.7  | 108199    | 160187.9  | 112984.6  | 177407.9  | 190583.6  | 130626.2  | 191265.7  | 189287    |
| 124725.9  | 111313.4  | 108549.4  | 147512.7  | 123368.3  | 166135.6  | 190038.9  | 139239.3  | 196776    | 187470.4  |

|           |           |           |           |           |           |           |           |           |           |
|-----------|-----------|-----------|-----------|-----------|-----------|-----------|-----------|-----------|-----------|
| LP406.317 | LP407.185 | LP407.204 | LP407.262 | LP407.282 | LP407.351 | LP407.352 | LP407.388 | LP408.188 | LP408.222 |
| 206473.5  | 176839.4  | 21059.78  | 56481.55  | 42876.89  | 38860.48  | 27181.58  | 33082.43  | 86482.11  | 102393.5  |
| 205385.1  | 140885.9  | 13069.02  | 44235.01  | 38597.26  | 34775.13  | 31052.77  | 30556.51  | 95200.25  | 94922.66  |
| 206315.7  | 224041.6  | 17188.89  | 50648.34  | 39321.08  | 33777.65  | 29651.21  | 30318.89  | 55137.42  | 94511.1   |
| 188682.6  | 174833.3  | 16036.7   | 23710.21  | 41945.71  | 32328.77  | 30502.88  | 28792.03  | 58472.49  | 77562.47  |
| 198870.4  | 151869.1  | 17818.73  | 50004.51  | 43427.98  | 36197.88  | 24424.17  | 28129.45  | 96543.33  | 95192.61  |

|           |           |           |           |           |           |           |           |           |           |
|-----------|-----------|-----------|-----------|-----------|-----------|-----------|-----------|-----------|-----------|
| LP408.223 | LP408.222 | LP408.223 | LP408.223 | LP408.222 | LP408.222 | LP408.223 | LP408.223 | LP408.222 | LP408.222 |
| 115067.6  | 46607.55  | 82999.91  | 135923.9  | 74271.78  | 73545.68  | 60193.82  | 63949.79  | 83985.11  | 61233.36  |
| 119934.6  | 65320.04  | 90317.4   | 116167.9  | 71796.07  | 68966.98  | 59001.25  | 70133.41  | 86299.83  | 57848.8   |
| 122344.2  | 45928.18  | 82601.67  | 126161.6  | 79227.49  | 69101.88  | 59281.62  | 77330.17  | 86696.66  | 63996.15  |
| 96467.71  | 56682.26  | 93522.4   | 113545.6  | 76628.45  | 68528.44  | 59151.67  | 70004.3   | 83179.5   | 58173.16  |
| 114300.9  | 50754.89  | 94092.56  | 135849    | 71742.11  | 60630.26  | 61008.03  | 75753.73  | 80597.29  | 53141.7   |

|           |           |           |           |           |           |           |           |           |           |
|-----------|-----------|-----------|-----------|-----------|-----------|-----------|-----------|-----------|-----------|
| LP408.223 | LP408.224 | LP408.223 |
| 97006.42  | 71515.64  | 87302.78  | 76011.65  | 107253.8  | 73241.96  | 85852.09  | 83408.31  | 67027.47  | 69730.24  |
| 94972.75  | 72516.18  | 76559.32  | 76805.66  | 115905.8  | 67806.28  | 86349.61  | 80571.08  | 71171.09  | 75613.13  |
| 107310.5  | 73457.22  | 75595.74  | 76953.01  | 119349.6  | 67337.69  | 79602     | 77580.29  | 60176.21  | 79669.39  |
| 99545.9   | 109472.3  | 77424.08  | 74653.66  | 118936.6  | 68144.96  | 82792.7   | 71291.18  | 66677.4   | 78306.62  |
| 97232.26  | 71340.43  | 76956.05  | 75624.09  | 113244.4  | 67418.95  | 76562.17  | 78756.13  | 70431.78  | 76597.57  |



|           |           |           |           |           |           |           |           |           |           |
|-----------|-----------|-----------|-----------|-----------|-----------|-----------|-----------|-----------|-----------|
| LP408.223 | LP408.223 | LP408.224 | LP408.223 | LP408.222 | LP408.224 | LP408.223 | LP408.222 | LP408.223 | LP408.223 |
| 74454.72  | 96279.53  | 63791.37  | 67267.1   | 73172.07  | 78479.34  | 44282.07  | 58559.21  | 66311.89  | 66785.49  |
| 74180.39  | 92609.23  | 79172.3   | 59632.62  | 78616.97  | 84771.98  | 51420.22  | 55282.07  | 58534.86  | 69198.61  |
| 68067.75  | 97886.17  | 78330.4   | 66650.42  | 70116.1   | 90273.11  | 48595.53  | 57547.76  | 69842.19  | 65716.88  |
| 74562.68  | 89179.14  | 78103.5   | 61424.26  | 71600.56  | 78074.83  | 43347.69  | 58350.32  | 63749.33  | 73565.2   |
| 76266.15  | 90244.56  | 74962.65  | 62324.74  | 75721.72  | 89401.31  | 41725.49  | 59734.78  | 69594.47  | 65013.32  |

|           |           |           |           |           |           |           |           |           |           |
|-----------|-----------|-----------|-----------|-----------|-----------|-----------|-----------|-----------|-----------|
| LP408.223 | LP408.223 | LP408.223 | LP408.223 | LP408.259 | LP408.259 | LP408.259 | LP408.259 | LP408.259 | LP408.259 |
| 61612.47  | 66635.46  | 54258.84  | 130671.1  | 216361.1  | 125835.5  | 215647.1  | 340129.7  | 129347.1  | 115694.7  |
| 68375.52  | 59102.29  | 48397.52  | 128614    | 201486    | 139056.5  | 210301.2  | 120028    | 133547.5  | 117649.6  |
| 67365.88  | 62804.74  | 50312.86  | 135047.5  | 202278.9  | 141659.5  | 208765    | 339238.8  | 127615.6  | 111444.1  |
| 61041.1   | 62253.43  | 48704.96  | 129972.5  | 206882.1  | 145845.2  | 210041.6  | 352769.5  | 122404.4  | 118066.7  |
| 64304.23  | 75091.3   | 50993.07  | 132952.7  | 192449.1  | 148783    | 156540.8  | 335480.4  | 121095.3  | 92671.75  |

|           |           |           |           |           |           |           |           |           |           |
|-----------|-----------|-----------|-----------|-----------|-----------|-----------|-----------|-----------|-----------|
| LP408.259 |
| 100719.4  | 155392.5  | 143157.4  | 194478.3  | 141027.8  | 198060.3  | 114211.6  | 241222.5  | 119516.1  | 113172.4  |
| 120696.4  | 155138.7  | 141626.3  | 188975.7  | 132233.5  | 207932.3  | 114902.6  | 211891.1  | 138974    | 136940.6  |
| 120200.2  | 154668.4  | 149467.6  | 209423.1  | 141554.6  | 186618.8  | 108633.2  | 213773.9  | 137706.1  | 140796.9  |
| 100763.2  | 154722.7  | 116316.4  | 161450.6  | 133430.5  | 189067.5  | 109787.9  | 230025.3  | 141982.7  | 146825.3  |
| 103886.1  | 140839    | 141193.4  | 202703    | 127338    | 179963.8  | 122075.2  | 243466.3  | 133960    | 135949    |

|           |           |           |           |           |           |           |           |           |           |
|-----------|-----------|-----------|-----------|-----------|-----------|-----------|-----------|-----------|-----------|
| LP408.259 | LP408.259 | LP408.259 | LP408.259 | LP408.259 | LP408.259 | LP408.26_ | LP408.259 | LP408.295 | LP408.295 |
| 214786    | 184421.4  | 132930.5  | 145964    | 156739.8  | 169434.1  | 126900.3  | 180767.6  | 151689.5  | 208612.6  |
| 210726.2  | 176445.9  | 125684.2  | 150525.5  | 173814.8  | 143801.7  | 138144.3  | 170699.2  | 152526.1  | 345372.3  |
| 198080.9  | 170309    | 128696.6  | 139944    | 170897.2  | 139066.4  | 130088.2  | 189678.7  | 127392.9  | 335848.9  |
| 196952.9  | 188010.1  | 141138.1  | 151403.7  | 150038.2  | 159856.9  | 141569.8  | 178149.2  | 204234.9  | 238252.1  |
| 207599.5  | 180934.6  | 132241    | 145609    | 158057.5  | 140553.4  | 133796.7  | 173946.6  | 186181.7  | 245124.5  |

|            |            |            |            |            |            |            |            |            |            |
|------------|------------|------------|------------|------------|------------|------------|------------|------------|------------|
| LP408.295! | LP408.295! | LP408.295! | LP408.295! | LP408.296! | LP408.295! | LP408.296! | LP408.295! | LP408.295! | LP408.295! |
| 194662.5   | 211399.5   | 316743.7   | 144902.2   | 221661.6   | 181395.4   | 245711.8   | 235411.7   | 355294.8   | 219084.8   |
| 200027.1   | 191366.6   | 371796.5   | 146556.7   | 245614     | 250625.2   | 236080.9   | 277075.7   | 254581.4   | 194814.8   |
| 172176.6   | 195612.6   | 281701     | 251965.8   | 217049.4   | 244975.9   | 349724     | 184629.7   | 269231.7   | 186768.2   |
| 240561.8   | 263014.9   | 318598.6   | 155598.9   | 259176.2   | 208824.3   | 257059.7   | 176343.6   | 273185.9   | 196440.8   |
| 152600.1   | 204870.1   | 248707.1   | 142870.7   | 379709.8   | 187528.4   | 265960.3   | 166173.3   | 557957.5   | 181623.8   |

|           |           |           |           |           |           |           |           |           |           |
|-----------|-----------|-----------|-----------|-----------|-----------|-----------|-----------|-----------|-----------|
| LP408.295 | LP408.295 | LP408.295 | LP408.296 | LP408.296 | LP408.296 | LP408.295 | LP408.296 | LP408.296 | LP408.296 |
| 245909.2  | 154662.6  | 158165.3  | 182944.3  | 303017.2  | 253801    | 178722.5  | 165110    | 195292    | 121663.9  |
| 306381.9  | 170758.8  | 176218.3  | 164192.6  | 182821.4  | 270170.2  | 171212.5  | 232079.3  | 149443.6  | 162496.4  |
| 490619.2  | 164560.9  | 142653.8  | 177502.8  | 169920.6  | 246747.5  | 149555    | 190501    | 223759.7  | 128068.7  |
| 249999.9  | 147923.4  | 172454.4  | 172889.4  | 194884.8  | 297807.3  | 170831.3  | 160823.8  | 161195.5  | 124204    |
| 227417.3  | 150829.3  | 180673.9  | 156154.1  | 197333.9  | 293857.5  | 162323.8  | 261318    | 218255.8  | 136082.4  |

|           |           |           |           |           |           |           |           |           |           |
|-----------|-----------|-----------|-----------|-----------|-----------|-----------|-----------|-----------|-----------|
| LP408.296 | LP408.295 | LP408.296 |
| 159814    | 177461.3  | 140027.5  | 206615.4  | 191551    | 185017.7  | 186268.4  | 193335.3  | 283144    | 120448    |
| 215981.6  | 159810.4  | 129610.8  | 202540.4  | 129272.5  | 132380.8  | 210099.2  | 181588.3  | 155931.5  | 159381.9  |
| 187489.1  | 172152    | 113897    | 186927.1  | 160636.3  | 114209.1  | 150860.8  | 193722.4  | 131092.7  | 133178.3  |
| 180591.9  | 160360.4  | 136516.7  | 196679.5  | 140374.8  | 117895.7  | 182649.4  | 183543.5  | 171536.8  | 159532    |
| 238494.6  | 171276.9  | 129536.5  | 182004.1  | 161456.6  | 169215.1  | 213788.4  | 161650.6  | 181954.3  | 104568.3  |

|           |          |          |          |          |          |          |          |          |          |          |
|-----------|----------|----------|----------|----------|----------|----------|----------|----------|----------|----------|
| LP408.295 | 185798.9 | 173876.5 | 142237   | 174269.1 | 143781.2 | 146661.2 | 204973.2 | 128941.3 | 117191.9 | 204035.3 |
| LP408.296 | 200567   | 170073.1 | 140320.1 | 220277.8 | 156479.8 | 151256.6 | 190332.5 | 169919.3 | 132274.7 | 214429.9 |
| LP408.296 | 166941.1 | 177050.3 | 162063.2 | 188351   | 152042.2 | 125853.6 | 188694   | 143376.8 | 138330.7 | 189215.8 |
| LP408.296 | 173286.9 | 176014.5 | 144071.4 | 165736   | 154293.3 | 151242.6 | 199991.6 | 147302   | 127211.6 | 203022.8 |
| LP408.296 | 161974.3 | 175705.7 | 160860.6 | 150680   | 151186   | 140394.5 | 186089.3 | 150083.8 | 127004.9 | 162396.7 |



|           |           |           |           |           |           |           |           |           |           |
|-----------|-----------|-----------|-----------|-----------|-----------|-----------|-----------|-----------|-----------|
| LP408.296 | LP408.296 | LP408.296 | LP408.295 | LP408.296 | LP408.296 | LP408.295 | LP408.296 | LP408.296 | LP408.296 |
| 212073.8  | 176986.7  | 228828.6  | 157207.8  | 171485.4  | 213062.5  | 150294.9  | 201903.3  | 143254.1  | 176659    |
| 210994.5  | 177477.5  | 115745.6  | 153483.2  | 148854.1  | 151245.6  | 117944.6  | 214021    | 163643.7  | 168740    |
| 177514.4  | 198030.7  | 101686.7  | 115416.9  | 171724.8  | 144450.2  | 141155.8  | 186367.7  | 171597.6  | 176427.8  |
| 195931.1  | 171896    | 112745.1  | 165087.4  | 184248.5  | 143726.8  | 169225.6  | 201638.4  | 157677.1  | 149004.4  |
| 247612.4  | 170780.9  | 123583.1  | 152631.3  | 173088.3  | 146673.6  | 163068.3  | 215515.5  | 164319.2  | 180052.6  |

|           |           |           |           |           |           |           |           |           |           |
|-----------|-----------|-----------|-----------|-----------|-----------|-----------|-----------|-----------|-----------|
| LP408.296 | LP408.296 | LP408.296 | LP408.296 | LP408.296 | LP408.296 | LP408.295 | LP408.295 | LP408.296 | LP408.296 |
| 183833.3  | 162271.9  | 156692.5  | 149035.1  | 181692.4  | 221419.7  | 151473.8  | 152774.7  | 112580.4  | 69395.72  |
| 202585.7  | 137242.6  | 141523.2  | 141365.1  | 162071.4  | 200878.9  | 111020.8  | 139601.9  | 96772.83  | 84769.65  |
| 198679.9  | 138387.7  | 171726    | 207666.6  | 153027.6  | 220446.5  | 157336.7  | 155816    | 118847.8  | 109250.2  |
| 169592.9  | 114860.6  | 125644.7  | 152927.8  | 174972.7  | 173090.3  | 143871.6  | 159772.8  | 115090.4  | 120510.3  |
| 224289.2  | 130083.6  | 130854.5  | 145559.8  | 296282.5  | 264044.1  | 127604.7  | 134976.7  | 86108.18  | 107564.1  |

|           |           |           |           |           |           |           |           |           |           |
|-----------|-----------|-----------|-----------|-----------|-----------|-----------|-----------|-----------|-----------|
| LP408.295 | LP408.296 | LP408.295 | LP408.295 | LP408.295 | LP408.295 | LP408.296 | LP408.296 | LP408.295 | LP408.295 |
| 159149.4  | 175016.3  | 56323.28  | 91786.97  | 102106.2  | 102767.3  | 182286.8  | 117158.3  | 151389.1  | 106641.3  |
| 140956.6  | 170699.7  | 108317.7  | 102982.2  | 98452.82  | 72204.57  | 66295.73  | 131343.2  | 157713.7  | 103881.6  |
| 187145.9  | 180534.8  | 60774.31  | 105138.4  | 103852.4  | 96830.9   | 180813.8  | 127044.3  | 147076.4  | 108371.9  |
| 158482    | 194678.9  | 93066.46  | 97403.71  | 101449.8  | 100267.9  | 182959.3  | 122840.7  | 139378.3  | 90574.78  |
| 166160    | 171471.2  | 70809.7   | 95287.93  | 76492.46  | 110108.5  | 169991.6  | 68461.67  | 158318.9  | 96060.24  |

|           |           |           |           |           |           |           |           |           |           |
|-----------|-----------|-----------|-----------|-----------|-----------|-----------|-----------|-----------|-----------|
| LP408.296 | LP408.309 | LP408.309 | LP408.332 | LP408.368 | LP408.368 | LP409.258 | LP409.292 | LP409.310 | LP409.312 |
| 106206    | 141985.9  | 198833.8  | 235276.4  | 57677.49  | 59156.17  | 48026.99  | 60986.2   | 92050.35  | 30009.85  |
| 104138.2  | 142695.7  | 183752    | 234072.2  | 54112.53  | 55627.27  | 39717.82  | 64243.14  | 96972.71  | 31890.23  |
| 101863.3  | 32220.93  | 187741.4  | 251541.4  | 46961.36  | 64303.85  | 36098.6   | 68377.28  | 110164.5  | 34465.94  |
| 95287.4   | 152308.7  | 197666    | 84913.03  | 52538.31  | 70467.36  | 41093.51  | 67170.16  | 98806.67  | 29669.02  |
| 94307.94  | 147308.6  | 186807    | 254341.1  | 49096.38  | 70475.09  | 36680.76  | 67285.11  | 83083.01  | 28114.74  |

|           |           |          |           |           |           |           |           |           |           |
|-----------|-----------|----------|-----------|-----------|-----------|-----------|-----------|-----------|-----------|
| LP409.311 | LP409.329 | LP409.33 | LP409.367 | LP409.367 | LP409.368 | LP409.368 | LP409.368 | LP409.368 | LP409.383 |
| 27452.06  | 151099.2  | 59612.93 | 33406.33  | 46167.06  | 33475.35  | 70918.37  | 38079.86  | 41722.11  | 46903.96  |
| 28806.08  | 162693.9  | 54803.75 | 32560.5   | 49584.28  | 30323.31  | 72866.18  | 37037.92  | 34926.47  | 48316.02  |
| 29327.51  | 170445.1  | 56921.65 | 33278.17  | 45275.85  | 30258.67  | 76043.76  | 41008.53  | 32298.61  | 48309.14  |
| 26533.56  | 182623.9  | 61838.84 | 29638.87  | 42542.54  | 30155.27  | 68519.33  | 39238.6   | 33551.65  | 45752.32  |
| 28441.31  | 185974.9  | 61544.9  | 31070.16  | 45148.03  | 30522.99  | 74973.26  | 39540.85  | 34305.01  | 45483.95  |

|           |           |           |           |           |           |           |           |           |           |
|-----------|-----------|-----------|-----------|-----------|-----------|-----------|-----------|-----------|-----------|
| LP409.382 | LP409.383 | LP409.404 | LP409.404 | LP409.404 | LP409.404 | LP410.152 | LP410.238 | LP410.239 | LP410.239 |
| 36800.56  | 34042.26  | 37865.54  | 37424.79  | 42483.01  | 49874.92  | 33470.98  | 194043.2  | 126109.8  | 110981.8  |
| 33719.61  | 35788.59  | 35105.23  | 31184.56  | 39340.36  | 47854.87  | 33232.89  | 188429.9  | 117838.1  | 109176.8  |
| 38835.37  | 29593.66  | 37030.45  | 34526.84  | 44257.87  | 44810.32  | 45969.01  | 199840.3  | 113060.9  | 107021    |
| 31872.63  | 28843.73  | 42565.87  | 35884.84  | 39082.1   | 45901.95  | 38381.81  | 176704.3  | 166485    | 113971.6  |
| 36523.6   | 30674.59  | 39094.6   | 36677     | 37312.16  | 44472.29  | 28959.73  | 210034    | 108883.7  | 100709.3  |

|           |           |           |           |           |           |           |           |           |           |
|-----------|-----------|-----------|-----------|-----------|-----------|-----------|-----------|-----------|-----------|
| LP410.239 | LP410.238 | LP410.239 | LP410.239 | LP410.239 | LP410.239 | LP410.239 | LP410.239 | LP410.238 | LP410.238 |
| 80553.61  | 89418.85  | 124207.4  | 92095.58  | 94637.83  | 118638.4  | 110936.5  | 78257.71  | 84201.72  | 52767.95  |
| 85883.91  | 87910.26  | 123302    | 88851.47  | 88691.31  | 123519.8  | 113760.2  | 76689.53  | 76816.31  | 62199.06  |
| 88885.19  | 87863.77  | 114650.4  | 95069.81  | 87929.31  | 112492.7  | 118982.7  | 75067.76  | 72436.64  | 63704.36  |
| 98493.03  | 81622.76  | 129503.4  | 94773.15  | 103944.3  | 123672.8  | 125961.1  | 86041.17  | 88715.58  | 67313.46  |
| 87461.89  | 85454.93  | 121833.5  | 96916.48  | 90627.75  | 110628.3  | 112003.3  | 76240.1   | 76686.22  | 58259.67  |

|           |           |           |           |           |           |           |           |           |           |
|-----------|-----------|-----------|-----------|-----------|-----------|-----------|-----------|-----------|-----------|
| LP410.238 | LP410.258 | LP410.275 | LP410.275 | LP410.274 | LP410.275 | LP410.275 | LP410.275 | LP410.274 | LP410.275 |
| 89893.42  | 65742.1   | 104629.2  | 108589.3  | 129057.2  | 119754.2  | 125271.6  | 100872.1  | 90722.03  | 98152.05  |
| 88236.69  | 114219.2  | 110648.6  | 126138.2  | 150770.5  | 165097.7  | 122951.9  | 106926.4  | 107556.8  | 109832    |
| 92114.99  | 55805.51  | 105544.3  | 116643.8  | 109188.2  | 120699.6  | 111414.1  | 104704.8  | 86615.42  | 92257.79  |
| 74649.69  | 109966.9  | 106118.5  | 120833.4  | 115861.9  | 114874.9  | 114274.9  | 107172.3  | 88731.71  | 91730.34  |
| 81345.71  | 109122.7  | 103493.7  | 101299.1  | 144851.6  | 128805.7  | 161899.4  | 82528.2   | 127442.2  | 79926.43  |



|           |           |           |           |           |           |           |           |           |           |
|-----------|-----------|-----------|-----------|-----------|-----------|-----------|-----------|-----------|-----------|
| LP410.275 | LP410.275 | LP410.275 | LP410.275 | LP410.274 | LP410.275 | LP410.274 | LP410.275 | LP410.275 | LP410.275 |
| 125291.2  | 150139.8  | 78100.79  | 88494.72  | 84230.55  | 98034.45  | 59283.13  | 82163.93  | 105450.4  | 84265.53  |
| 117020    | 120300.4  | 69176.46  | 91502.81  | 148272.2  | 86989.15  | 70072.99  | 85339.68  | 123524.5  | 100533.4  |
| 121610.6  | 144125.3  | 75604.42  | 88687.3   | 82760.94  | 94505     | 56241.4   | 76843.79  | 98127.65  | 77372.4   |
| 125218.7  | 162647.8  | 76655.89  | 95192.15  | 86598.63  | 100461.6  | 53414.44  | 80506.96  | 98766.73  | 70041     |
| 136078.8  | 141904.1  | 70756.1   | 114050.7  | 93917.31  | 112020.5  | 71438.68  | 85632     | 91990.84  | 81490.1   |

|           |           |           |           |           |           |           |           |           |           |
|-----------|-----------|-----------|-----------|-----------|-----------|-----------|-----------|-----------|-----------|
| LP410.275 |
| 170281.7  | 69131     | 91544.57  | 86374.42  | 84064.96  | 78667.25  | 77876.94  | 71896.38  | 53815.45  | 64867.9   |
| 168899.7  | 76009.23  | 99590.14  | 124520.1  | 125492.6  | 103243.1  | 71209.62  | 121195.7  | 58325.44  | 79268.04  |
| 160645.9  | 80196.46  | 80339.19  | 89521.98  | 86939.28  | 78145.03  | 79606     | 67498.26  | 62384.76  | 61331.03  |
| 158660.8  | 72646.89  | 82746.6   | 93634.86  | 80474.58  | 75971.44  | 77322.16  | 71220.77  | 65578.11  | 62427.63  |
| 148102    | 70251.38  | 91418.68  | 109677.9  | 66237.3   | 72176.83  | 74282.03  | 107474.4  | 56072.42  | 104238.4  |

|           |           |           |           |           |           |           |           |           |           |
|-----------|-----------|-----------|-----------|-----------|-----------|-----------|-----------|-----------|-----------|
| LP410.275 |
| 92444.63  | 72038.12  | 65205.9   | 93301.75  | 89356.83  | 58131.8   | 89090.38  | 100900.1  | 78265.4   | 66948.98  |
| 113022.5  | 76168.9   | 90546.98  | 109199.1  | 113350.4  | 70022.96  | 83379.49  | 94647.84  | 108873.8  | 72894.88  |
| 94783.93  | 68628.46  | 72562.99  | 89288.09  | 95820.88  | 64940.07  | 81683.91  | 91860.86  | 81197.16  | 66802.68  |
| 95478.22  | 70714.66  | 74477.5   | 103304.6  | 90194.59  | 54634.97  | 87749.33  | 90583.13  | 73234.29  | 65948.94  |
| 122727.2  | 70404.18  | 80388.03  | 62034.22  | 88268.75  | 71479.68  | 84206.56  | 97129.87  | 71118.78  | 68945.42  |

|           |           |           |           |           |           |           |           |           |           |
|-----------|-----------|-----------|-----------|-----------|-----------|-----------|-----------|-----------|-----------|
| LP410.275 | LP410.275 | LP410.275 | LP410.275 | LP410.275 | LP410.275 | LP410.274 | LP410.275 | LP410.274 | LP410.275 |
| 76590.89  | 81231.52  | 83462.99  | 75011.05  | 66524.36  | 72677.93  | 82337.64  | 68191.15  | 101054.6  | 72902.86  |
| 71363.38  | 84161.17  | 100702.4  | 68211.47  | 79606.64  | 61078.58  | 113689.9  | 69413.23  | 74516.76  | 104349.9  |
| 69211.95  | 82022.69  | 92820.86  | 74069.67  | 63658.72  | 58807.89  | 74436.06  | 64489.29  | 103519.6  | 71823.31  |
| 72742.08  | 77807.59  | 89202.15  | 72567.31  | 61796.97  | 56393.31  | 82236.55  | 66231.21  | 99871.61  | 76144.38  |
| 73754.81  | 81764.16  | 86697.31  | 69791.18  | 86468.51  | 98867.34  | 78201.19  | 68511.65  | 80602.29  | 69597.56  |

|           |           |           |           |           |           |           |           |           |           |
|-----------|-----------|-----------|-----------|-----------|-----------|-----------|-----------|-----------|-----------|
| LP410.275 |
| 69102.55  | 71255.64  | 64222.65  | 92791.59  | 76799.76  | 88827.8   | 75150.08  | 98250.76  | 88702.06  | 79976.68  |
| 76083.05  | 65019.86  | 70541.92  | 92421.84  | 73015.87  | 92187.27  | 112307    | 93727.32  | 88028.53  | 82655.53  |
| 62213.25  | 71004.18  | 64067.24  | 88160.97  | 71256.4   | 82546.5   | 73939.91  | 95918.54  | 80974.8   | 68290.51  |
| 57704.27  | 69464.24  | 60783.38  | 102809.1  | 78274.09  | 91490.74  | 76712.87  | 91320.15  | 82935.56  | 67362.51  |
| 46366.45  | 82232.9   | 49760.61  | 63277.5   | 63814.04  | 65963.3   | 70525.18  | 95547.82  | 68113.43  | 94031.72  |

|           |           |           |           |           |           |           |           |           |           |
|-----------|-----------|-----------|-----------|-----------|-----------|-----------|-----------|-----------|-----------|
| LP410.275 | LP410.275 | LP410.275 | LP410.275 | LP410.274 | LP410.274 | LP410.275 | LP410.275 | LP410.275 | LP410.275 |
| 91033.28  | 85416.7   | 82654.67  | 64384.49  | 64969.2   | 59253.61  | 54299.06  | 52012.44  | 54150.06  | 51260.16  |
| 96673.68  | 65479.47  | 79142.12  | 85910.38  | 55744.42  | 70391.43  | 69753.41  | 45803.25  | 59872.97  | 60087.08  |
| 84323.49  | 69022.82  | 85405.07  | 65284.31  | 65955.21  | 54396.36  | 55518.2   | 58581.83  | 53503.88  | 50384.17  |
| 94636.27  | 74303.52  | 75444.06  | 67225.74  | 66540.92  | 68933.22  | 46674.54  | 56669.44  | 47933.21  | 50169.65  |
| 125575.8  | 75306.5   | 75924.68  | 71213.59  | 59290.43  | 61451.58  | 52877.49  | 48676.7   | 72665.37  | 51097.06  |

|           |           |           |           |           |           |           |           |           |           |
|-----------|-----------|-----------|-----------|-----------|-----------|-----------|-----------|-----------|-----------|
| LP410.275 |
| 62431.41  | 73544.27  | 77272.49  | 81151.38  | 62677.29  | 73263.79  | 63553.29  | 70013.22  | 52965.59  | 67670.25  |
| 54076.47  | 76926.76  | 78606.27  | 69344.48  | 64968.82  | 74864.91  | 94171.18  | 65510.34  | 54199.87  | 69542.62  |
| 59327.88  | 75278.6   | 61366.25  | 82651.76  | 70089.86  | 76535.08  | 71484.28  | 67662.4   | 58788.91  | 67730.36  |
| 65119.86  | 65958.02  | 60520.28  | 75880.29  | 69949.63  | 85089.35  | 72878.22  | 65004.23  | 48698.21  | 68533.83  |
| 54226.49  | 72653.7   | 57249.71  | 76956.46  | 67423.04  | 82046.65  | 70580.37  | 68818.78  | 49322.19  | 64817.19  |

|           |           |           |           |           |           |           |           |           |           |
|-----------|-----------|-----------|-----------|-----------|-----------|-----------|-----------|-----------|-----------|
| LP410.296 | LP410.332 | LP410.386 | LP411.199 |
| 78901.05  | 125255    | 7297.822  | 67619.86  | 44974.65  | 69100.08  | 45619.72  | 44800.83  | 68126.76  | 44601.34  |
| 68038.99  | 121309    | 10902.97  | 66445.79  | 44217.31  | 70131.53  | 45728.17  | 45070.27  | 67054.29  | 41355.04  |
| 74608.05  | 122180    | 9365.152  | 77628.63  | 45560.1   | 68694.28  | 47070.64  | 42617.33  | 69072.36  | 40977.77  |
| 73277.11  | 117042.1  | 5657.114  | 67286.21  | 46154.95  | 67543.38  | 54587.58  | 48141.17  | 67198.73  | 42876.52  |
| 73842.41  | 110718.2  | 8305.572  | 67440.81  | 48784.99  | 67169.91  | 49905.38  | 40955.14  | 71129.45  | 40429.67  |



|           |           |           |           |           |           |           |           |           |           |
|-----------|-----------|-----------|-----------|-----------|-----------|-----------|-----------|-----------|-----------|
| LP411.224 | LP411.244 | LP411.275 | LP411.275 | LP411.274 | LP411.275 | LP411.394 | LP411.431 | LP411.431 | LP411.431 |
| 61000.08  | 118185.4  | 26763.13  | 26188.04  | 35928.29  | 38198.64  | 9786.463  | 395357.7  | 38804.73  | 45771.88  |
| 63190     | 146072.4  | 36386.76  | 28188.86  | 36367.92  | 41204.18  | 11021.48  | 370986.7  | 37946.78  | 46504.59  |
| 67299.13  | 116949.6  | 30400.34  | 29756.11  | 38274.22  | 42478.5   | 14688.71  | 326462.9  | 36728.39  | 40254.71  |
| 66313.13  | 108200.2  | 35593.49  | 26359.4   | 32829.32  | 37559.49  | 14087.36  | 299427.3  | 33052.79  | 38996.94  |
| 70050.78  | 115114    | 26815.14  | 32538.74  | 37147.67  | 39164.23  | 16891.02  | 320066.5  | 25662.41  | 34527.62  |

|           |           |           |           |           |           |           |           |           |           |
|-----------|-----------|-----------|-----------|-----------|-----------|-----------|-----------|-----------|-----------|
| LP412.150 | LP412.218 | LP412.218 | LP412.218 | LP412.228 | LP412.252 | LP412.269 | LP412.305 | LP412.305 | LP412.378 |
| 19016.98  | 23434.56  | 28858.89  | 20669.95  | 10178.04  | 170918.7  | 23648.04  | 37442.87  | 50919.89  | 23693.36  |
| 20172.05  | 30336.74  | 25722.32  | 24892.53  | 10897.31  | 113102.2  | 27349.36  | 24004.74  | 52308.91  | 25950.3   |
| 14498.49  | 30827.64  | 23673.27  | 21300.6   | 11373.66  | 142349.1  | 26166.52  | 38563.2   | 45810.03  | 22122.01  |
| 17318.69  | 27604.11  | 28319.7   | 23922.21  | 11100.11  | 159831.9  | 19721.3   | 35179.13  | 39857.87  | 25838.69  |
| 12309.88  | 25173.23  | 31293.65  | 18815.29  | 14049.44  | 138383.3  | 25419.59  | 30705.87  | 42855.14  | 23285.6   |

|           |           |           |           |           |           |           |           |           |           |
|-----------|-----------|-----------|-----------|-----------|-----------|-----------|-----------|-----------|-----------|
| LP412.426 | LP413.177 | LP413.178 | LP413.178 | LP413.179 | LP413.179 | LP413.178 | LP413.178 | LP413.179 | LP413.179 |
| 21173.15  | 46418.49  | 85027.69  | 67526.96  | 109501    | 87912.96  | 99208.98  | 65765.69  | 76030.78  | 76051.76  |
| 30377.97  | 37376.09  | 75147.26  | 65058     | 79955.68  | 90383.13  | 75778.87  | 76782.77  | 71368.52  | 74954.92  |
| 29908.76  | 49331.32  | 89439.75  | 68663.75  | 92983.18  | 83970.61  | 70344.01  | 72731.52  | 70549.5   | 73910.07  |
| 25271.7   | 35248.31  | 87463.88  | 64350.18  | 98911.61  | 92381.56  | 74165.14  | 70640.33  | 67301.45  | 79136.16  |
| 24957.56  | 46224.61  | 81742.99  | 61147.86  | 90494.32  | 82736.73  | 72773.49  | 74799.32  | 78294.7   | 75639.34  |

|           |           |           |           |           |           |           |           |           |           |
|-----------|-----------|-----------|-----------|-----------|-----------|-----------|-----------|-----------|-----------|
| LP413.178 | LP413.179 | LP413.178 | LP413.179 | LP413.178 | LP413.179 | LP413.179 | LP413.178 | LP413.179 | LP413.178 |
| 61656.07  | 79269.53  | 53507.71  | 111737.7  | 98054.09  | 65455.35  | 73897.16  | 33047.46  | 87425.09  | 76126.04  |
| 98964.95  | 90614.45  | 46229.61  | 77061.62  | 65260.13  | 45078.26  | 89905.16  | 32826.07  | 90750.99  | 78918.88  |
| 93142.32  | 92492.38  | 53813.5   | 82992.89  | 66871.34  | 52302.81  | 74848.46  | 33901.49  | 86427.74  | 66236     |
| 91940.54  | 85459.27  | 54247.77  | 81245.55  | 64596.28  | 46857.46  | 74570.32  | 30514.69  | 83648.11  | 75340.03  |
| 99584.99  | 98029.35  | 54589.2   | 77269.92  | 66645.89  | 53287.67  | 74360.05  | 30369.84  | 87904.89  | 73980.26  |

|           |           |           |           |           |           |           |           |           |           |
|-----------|-----------|-----------|-----------|-----------|-----------|-----------|-----------|-----------|-----------|
| LP413.179 | LP413.179 | LP413.179 | LP413.179 | LP413.179 | LP413.179 | LP413.178 | LP413.179 | LP413.179 | LP413.178 |
| 107967.3  | 58768.55  | 106418.1  | 61825.28  | 90377.33  | 57299.72  | 34481.15  | 77106.72  | 64202.65  | 37438.91  |
| 88337.78  | 92575.52  | 79745.33  | 71368.23  | 85542.25  | 48173.9   | 25829.96  | 68404.67  | 67790.57  | 30459.98  |
| 78799.96  | 87786.9   | 84272.7   | 82798.41  | 81240.82  | 49193.85  | 27243.4   | 70188.36  | 68138.4   | 25383.79  |
| 86195.15  | 88720.02  | 82434.77  | 80153.9   | 78249.9   | 48463.81  | 29134.88  | 70598.79  | 71475.96  | 23246.65  |
| 87423.58  | 78414.43  | 87790.28  | 76426.99  | 83307.25  | 49506.75  | 29187.61  | 71760.42  | 70649.94  | 26362.86  |

|           |           |           |           |           |           |           |           |           |           |
|-----------|-----------|-----------|-----------|-----------|-----------|-----------|-----------|-----------|-----------|
| LP413.178 | LP413.179 | LP413.179 | LP413.178 | LP413.178 | LP413.178 | LP413.178 | LP413.179 | LP413.178 | LP413.179 |
| 71270.27  | 136361.9  | 90447.75  | 44160.99  | 38880.39  | 84997.72  | 47901.66  | 68516.28  | 53866.67  | 137267.5  |
| 70802.44  | 78093.71  | 72736.53  | 51429.5   | 47031.23  | 72646.54  | 55276.59  | 59005.75  | 60699.3   | 117830.2  |
| 61743.51  | 82129.92  | 71875.19  | 50604.87  | 41729.65  | 72606.37  | 59207.17  | 60840.97  | 53023.2   | 116184.1  |
| 64870.36  | 92326.96  | 73901.29  | 47693.28  | 41234.14  | 74742.84  | 60833.27  | 56875.4   | 57403.16  | 115483.3  |
| 62069.63  | 95146.21  | 71490.81  | 53712.75  | 44754.88  | 63158.06  | 61647.16  | 65486.55  | 66007.95  | 130043.7  |

|           |           |           |           |           |           |           |           |           |           |
|-----------|-----------|-----------|-----------|-----------|-----------|-----------|-----------|-----------|-----------|
| LP413.179 | LP413.178 | LP413.179 | LP413.179 | LP413.179 | LP413.179 | LP413.179 | LP413.178 | LP413.178 | LP413.179 |
| 65212.01  | 96380.6   | 77258.87  | 49615.66  | 71742.84  | 83278.92  | 59096.61  | 90674.43  | 26989.21  | 100217.7  |
| 81955.37  | 75187.95  | 60405.67  | 57830.53  | 66842.3   | 80819.9   | 69603.47  | 71395.39  | 28865.53  | 75458.57  |
| 80247.1   | 80696.87  | 72650.68  | 55725.57  | 67044.28  | 91250.36  | 67667.01  | 68057.69  | 29422.2   | 78720.38  |
| 84405.35  | 87580.62  | 64947.44  | 63191.65  | 67296.26  | 89401.16  | 75546.66  | 66777.29  | 28571.58  | 80723.29  |
| 86685.03  | 82963.86  | 66629.44  | 64976.19  | 75418.57  | 93323.01  | 69766.81  | 70432.29  | 32662.37  | 70610.52  |

|           |           |           |           |           |           |           |           |           |           |
|-----------|-----------|-----------|-----------|-----------|-----------|-----------|-----------|-----------|-----------|
| LP413.179 | LP413.178 | LP413.179 | LP413.178 | LP413.178 | LP413.179 | LP413.179 | LP413.179 | LP413.178 | LP413.178 |
| 58091.21  | 27185.29  | 89846.92  | 31396.85  | 18455.7   | 81626.66  | 64739.99  | 91593.4   | 36391.03  | 29050.66  |
| 65779.33  | 28508     | 59090.61  | 22327.51  | 24174.29  | 73403.17  | 56373.4   | 74785.9   | 48996.85  | 23181.48  |
| 63773.16  | 26833.05  | 64749.05  | 25194.2   | 25669.71  | 77263.69  | 50978.96  | 78239.7   | 47098.98  | 22104.97  |
| 75103.07  | 26036.1   | 59824.77  | 21586.96  | 18393.57  | 74211.27  | 55686.99  | 81184.81  | 49700.6   | 23638.59  |
| 70184.49  | 29426.31  | 59298.57  | 23296.62  | 22606.05  | 76742.93  | 59933.49  | 81532.8   | 49059.63  | 26531.38  |



|           |           |           |           |           |           |           |           |           |           |
|-----------|-----------|-----------|-----------|-----------|-----------|-----------|-----------|-----------|-----------|
| LP413.179 | LP413.179 | LP413.178 | LP413.179 | LP413.178 | LP413.179 | LP413.179 | LP413.179 | LP413.178 | LP413.179 |
| 53007.2   | 91998.26  | 24888.94  | 43355.05  | 62457     | 57488.81  | 76698.08  | 65036.37  | 37416.2   | 44715.65  |
| 56973.18  | 75983.3   | 25637.91  | 60386.26  | 85919.04  | 49223.02  | 62905.91  | 68996.04  | 37174.16  | 66792.68  |
| 56135.1   | 85045.79  | 23219.6   | 58642.89  | 81843.03  | 48751.07  | 64032.02  | 68535.49  | 32859.85  | 57319.12  |
| 60067.99  | 84011.98  | 27037.07  | 56615.29  | 80275.27  | 46406.3   | 65475.98  | 63142.66  | 38357     | 59378.6   |
| 65332.24  | 90611.8   | 23711.24  | 59303.55  | 72469.51  | 48450.61  | 57669.7   | 69498.28  | 36207.4   | 57591.31  |

|           |           |           |           |           |           |           |           |           |           |
|-----------|-----------|-----------|-----------|-----------|-----------|-----------|-----------|-----------|-----------|
| LP413.178 | LP413.179 | LP413.179 | LP413.178 | LP413.179 | LP413.179 | LP413.179 | LP413.179 | LP413.179 | LP413.178 |
| 21195.24  | 55865.03  | 128284.2  | 49246.75  | 67231.76  | 44388.6   | 91489.68  | 79446.36  | 64307.13  | 33895.36  |
| 27126.68  | 64379.25  | 95152.37  | 63222.56  | 53949.4   | 48136.71  | 63030.47  | 94244.37  | 70506.69  | 31757.69  |
| 25670.02  | 63254.86  | 100814    | 58845.7   | 49131.33  | 50715.88  | 62818.4   | 103267.7  | 63965.05  | 27501.51  |
| 24338.98  | 65235.57  | 98538.44  | 54660.94  | 45694.94  | 54471.96  | 68220.46  | 99840.45  | 62184.47  | 31202.2   |
| 25385.46  | 68536.89  | 100864.3  | 60410     | 55820.74  | 52715.64  | 61901.31  | 92617.39  | 68731.34  | 35557.16  |

|           |           |           |           |           |           |           |           |           |           |
|-----------|-----------|-----------|-----------|-----------|-----------|-----------|-----------|-----------|-----------|
| LP413.178 | LP413.179 | LP413.178 | LP413.179 | LP413.178 | LP413.178 | LP413.215 | LP413.215 | LP413.215 | LP413.215 |
| 30489.9   | 105487.7  | 56172.53  | 72496.25  | 32508.09  | 58735.08  | 70545.38  | 110875.2  | 59316.28  | 80860.34  |
| 30200.47  | 118801.8  | 85843.02  | 64809.75  | 29613.94  | 61971.11  | 75608.13  | 78828.47  | 63120.83  | 88058.79  |
| 28670.25  | 110560.3  | 88728.45  | 78302.71  | 28795.11  | 70201.25  | 81645.26  | 108792.5  | 64293.4   | 85667.93  |
| 28674.65  | 118203.4  | 87112.56  | 73996.37  | 27278.01  | 58011.62  | 71496.26  | 107430.5  | 59456.31  | 83572.7   |
| 30876.87  | 114262.5  | 90136.57  | 64549.1   | 29059.29  | 65491.63  | 78121.96  | 118602.6  | 62248.57  | 85745.46  |

|           |           |           |           |           |           |           |           |           |           |
|-----------|-----------|-----------|-----------|-----------|-----------|-----------|-----------|-----------|-----------|
| LP413.215 | LP413.215 | LP413.215 | LP413.215 | LP413.214 | LP413.215 | LP413.215 | LP413.215 | LP413.215 | LP413.215 |
| 62404.19  | 74839.2   | 81118.13  | 76759.62  | 71433.71  | 81627.53  | 70358.1   | 74444.58  | 75140.2   | 67668.36  |
| 66633.26  | 78707.14  | 75119.16  | 79120.39  | 71568.9   | 66131.87  | 64487.52  | 75126.77  | 67573.29  | 67956.27  |
| 65773.49  | 74538.21  | 97574.42  | 78740.45  | 69585.45  | 71862     | 62375.64  | 77785.38  | 62029.9   | 70549.76  |
| 61919.78  | 77129.43  | 91184.01  | 78934.15  | 71708.63  | 71117.84  | 72161.29  | 78500.5   | 60900.16  | 63716.4   |
| 58883.41  | 81557.7   | 87202.85  | 79346.85  | 70350.57  | 68199.51  | 68126.86  | 81851.83  | 64228.02  | 65134.17  |

|           |           |           |           |           |           |           |           |           |           |
|-----------|-----------|-----------|-----------|-----------|-----------|-----------|-----------|-----------|-----------|
| LP413.215 | LP413.215 | LP413.215 | LP413.214 | LP413.215 | LP413.215 | LP413.215 | LP413.215 | LP413.215 | LP413.215 |
| 96822.41  | 83064.39  | 82942.07  | 129771.4  | 85997.69  | 66781.24  | 78848.05  | 94074.68  | 71927.7   | 64236.52  |
| 95202.96  | 83113.07  | 91138.32  | 118468.5  | 74574.06  | 59799.74  | 75446.22  | 94284.61  | 60684.71  | 67081.11  |
| 97954.21  | 87438.65  | 85567.8   | 115196.3  | 79345.82  | 62582.8   | 82635.01  | 75179.52  | 72730.48  | 64961.61  |
| 92207.03  | 91001.79  | 87509.71  | 125087    | 75243.05  | 65140.39  | 78990.28  | 91286.43  | 71419.86  | 64572.41  |
| 91999.52  | 81277.53  | 89261.19  | 107161.2  | 73570.92  | 60719.75  | 75130.02  | 88795.56  | 76700.26  | 64611.85  |

|           |           |           |           |           |           |           |           |           |           |
|-----------|-----------|-----------|-----------|-----------|-----------|-----------|-----------|-----------|-----------|
| LP413.215 | LP413.266 | LP413.266 | LP413.266 |
| 82027.59  | 85993.66  | 100313.5  | 72275.98  | 79667.09  | 88138.77  | 62791.89  | 3116228   | 2689047   | 2466986   |
| 84621.22  | 87067.08  | 93133.11  | 75181.72  | 81626.47  | 91327     | 58598.34  | 5257592   | 2112595   | 1597534   |
| 79137.09  | 78409.21  | 100579.1  | 74710.52  | 77622.65  | 89277.86  | 61542.38  | 2820984   | 2236411   | 1948410   |
| 80475.98  | 81804.86  | 100479.7  | 75269.71  | 72083.96  | 84793.96  | 61937.29  | 3014502   | 2707236   | 2158264   |
| 77658.93  | 85261.99  | 92904.95  | 68961.43  | 66691.73  | 84218.87  | 62795.1   | 2857885   | 2866305   | 1640275   |

|           |           |           |           |           |           |           |           |           |           |
|-----------|-----------|-----------|-----------|-----------|-----------|-----------|-----------|-----------|-----------|
| LP413.266 |
| 2552749   | 2221931   | 3644581   | 3326988   | 5035510   | 3587894   | 3552497   | 2831917   | 2848265   | 2335107   |
| 2165148   | 2484223   | 2842863   | 3055688   | 4454204   | 3327090   | 3064285   | 3986518   | 2808455   | 4185208   |
| 3274831   | 2225131   | 2514774   | 2912201   | 4106330   | 2569787   | 3375877   | 2582680   | 4042383   | 2739852   |
| 2243328   | 2727978   | 3297621   | 3256044   | 7774780   | 3784276   | 2909591   | 3366592   | 4400974   | 2317029   |
| 2459694   | 3255647   | 4112962   | 2360554   | 4859723   | 4342925   | 3112815   | 1986519   | 3266250   | 2309645   |

|           |           |           |           |           |           |           |           |           |           |
|-----------|-----------|-----------|-----------|-----------|-----------|-----------|-----------|-----------|-----------|
| LP413.266 |
| 2890593   | 2431298   | 6117070   | 3081709   | 2438504   | 2252859   | 3296481   | 2144215   | 2070286   | 1743952   |
| 2799048   | 1833019   | 5476790   | 1962294   | 2998225   | 2579953   | 4368960   | 2539487   | 3338886   | 2392583   |
| 2567199   | 1998874   | 4433941   | 2663876   | 3061616   | 2142806   | 3435834   | 1851976   | 2298038   | 1990055   |
| 2647394   | 3349914   | 3495879   | 3054182   | 2645444   | 2780894   | 2603999   | 2171827   | 3667698   | 2710729   |
| 3586460   | 1578141   | 6851062   | 2008944   | 3424089   | 2849023   | 3931594   | 2236413   | 2261294   | 2741966   |



|           |           |           |           |           |           |           |           |           |           |
|-----------|-----------|-----------|-----------|-----------|-----------|-----------|-----------|-----------|-----------|
| LP413.266 |
| 7440986   | 3546316   | 2811040   | 2023756   | 2395693   | 2312133   | 2380901   | 4411514   | 2815873   | 2012863   |
| 7968978   | 3601231   | 3413198   | 2360211   | 1895948   | 1703528   | 2823338   | 3153021   | 4202334   | 3381689   |
| 9287362   | 2781153   | 3037745   | 1699107   | 2739024   | 2029899   | 3078144   | 11420409  | 2741160   | 2719180   |
| 5515615   | 3531454   | 4341635   | 2085413   | 2422443   | 2352983   | 2049468   | 5029988   | 3212301   | 2576579   |
| 11773158  | 3026965   | 3231041   | 2414289   | 2677350   | 1724775   | 3058633   | 3409687   | 4025034   | 3962179   |

|           |           |           |           |           |           |           |           |           |           |
|-----------|-----------|-----------|-----------|-----------|-----------|-----------|-----------|-----------|-----------|
| LP413.266 |
| 2619462   | 4745961   | 2822942   | 2506884   | 2385906   | 2461245   | 2756025   | 1553773   | 4135585   | 3596392   |
| 3207516   | 2625656   | 2237408   | 2097829   | 2690512   | 2415499   | 3454759   | 2501294   | 2856365   | 3341133   |
| 2507931   | 2852032   | 2656220   | 2302216   | 3780207   | 1775061   | 3146779   | 2507095   | 3516399   | 3256388   |
| 3206436   | 2560716   | 2701664   | 1903946   | 2488383   | 2026029   | 2933123   | 1813923   | 2083432   | 2944747   |
| 3787949   | 2503929   | 2329282   | 2392629   | 2589437   | 2450815   | 2753876   | 3064144   | 2730230   | 3676115   |

|           |           |           |           |           |           |           |           |           |           |
|-----------|-----------|-----------|-----------|-----------|-----------|-----------|-----------|-----------|-----------|
| LP413.266 |
| 1853504   | 3954913   | 3930177   | 2537086   | 2247147   | 2812784   | 3505383   | 1859269   | 3248783   | 2977235   |
| 2742726   | 2708306   | 3502725   | 2426570   | 2944152   | 2789707   | 4787130   | 1832912   | 3449058   | 3507153   |
| 1985366   | 4112241   | 2715997   | 2305229   | 1960838   | 1983178   | 2487248   | 2324857   | 3913362   | 3881118   |
| 2632040   | 2942288   | 2981262   | 2529413   | 3243122   | 1794093   | 3907558   | 1617113   | 3692225   | 2799258   |
| 2729114   | 2879309   | 2875128   | 2201859   | 2038733   | 2229383   | 3685571   | 2410932   | 2761310   | 3315642   |

|           |           |           |           |           |           |           |           |           |           |
|-----------|-----------|-----------|-----------|-----------|-----------|-----------|-----------|-----------|-----------|
| LP413.266 |
| 3240391   | 1873254   | 1604544   | 2793351   | 1973972   | 3344291   | 3640452   | 1729347   | 2095356   | 1875260   |
| 3399444   | 2066943   | 1774299   | 2304819   | 2279189   | 3055048   | 3974021   | 1773537   | 1997603   | 2084544   |
| 2762086   | 2310345   | 3318103   | 1907654   | 1874030   | 3474382   | 2741595   | 1636922   | 2015680   | 1548064   |
| 3635512   | 1912902   | 1799025   | 2577495   | 1946787   | 3183711   | 3113828   | 1528345   | 1533822   | 2084932   |
| 2890685   | 2226639   | 2205690   | 2711351   | 1893598   | 2675598   | 2766560   | 1662421   | 1901558   | 2811923   |

|           |           |           |           |           |           |           |           |           |           |
|-----------|-----------|-----------|-----------|-----------|-----------|-----------|-----------|-----------|-----------|
| LP413.266 |
| 1992948   | 1850942   | 3640004   | 2242365   | 351410.3  | 4861583   | 246046    | 2165437   | 230561.2  | 315546.2  |
| 2153791   | 1874454   | 2123933   | 1821866   | 308201.1  | 5461211   | 280759    | 1997904   | 225941.5  | 302143.5  |
| 1359179   | 1299773   | 2564764   | 1788425   | 341134.4  | 5147328   | 216908.8  | 2271509   | 217330.3  | 326286.8  |
| 1922942   | 2330774   | 2300511   | 1686649   | 319573.3  | 4309669   | 227763.9  | 2256530   | 254598.1  | 311804.3  |
| 2622864   | 2013512   | 2481646   | 1749624   | 314553.3  | 4400413   | 239453    | 2456046   | 269163.9  | 330908.3  |

|           |           |           |           |           |           |           |           |           |           |
|-----------|-----------|-----------|-----------|-----------|-----------|-----------|-----------|-----------|-----------|
| LP413.266 | LP413.381 | LP413.381 | LP413.418 |
| 348164.6  | 195702.5  | 223222.2  | 319465.3  | 182050.1  | 208105.6  | 207246.8  | 32065.81  | 24552.39  | 26811.76  |
| 310459.1  | 192562    | 249778.5  | 223444.2  | 171930.8  | 185206.2  | 200850.6  | 31273.22  | 21969.37  | 26539.68  |
| 433589.8  | 208516.7  | 243950.1  | 182005.5  | 175294.1  | 174968.9  | 179979.7  | 32468.56  | 25000.34  | 25460.02  |
| 315415.2  | 207112.7  | 249030.9  | 216854.9  | 171828.9  | 185925.8  | 198429.7  | 28747.82  | 23648.78  | 24528.96  |
| 335486.8  | 231330.6  | 295278.3  | 237273.6  | 211436.5  | 252324.1  | 220077.8  | 26716.18  | 24064.26  | 26415.7   |

|           |           |           |           |           |           |           |           |           |           |
|-----------|-----------|-----------|-----------|-----------|-----------|-----------|-----------|-----------|-----------|
| LP413.446 | LP414.233 | LP414.233 | LP414.233 |
| 12666.91  | 21426.58  | 53258.46  | 35123.74  | 23377.61  | 19881.99  | 11293.18  | 92681.38  | 183919.5  | 138169.9  |
| 18552.59  | 18563.62  | 55113.47  | 32591.81  | 24029.88  | 17602.62  | 13884.06  | 90647.91  | 186773.3  | 142791.8  |
| 16241.83  | 19964.22  | 71036.37  | 34469.77  | 29442.23  | 17564.64  | 13841.32  | 99481.22  | 172280.8  | 150877.3  |
| 19040     | 17672.81  | 80027.16  | 33808.19  | 32510.25  | 12807.52  | 12905.98  | 90495.96  | 184366.8  | 143178.6  |
| 17518.99  | 21079.65  | 79633.11  | 32587.9   | 41722.08  | 19939.92  | 10044.33  | 96823.57  | 191183.7  | 145724.1  |

|           |           |           |           |           |           |           |           |           |           |
|-----------|-----------|-----------|-----------|-----------|-----------|-----------|-----------|-----------|-----------|
| LP414.27_ | LP414.269 | LP414.269 | LP414.269 | LP414.269 | LP414.269 | LP414.269 | LP414.27_ | LP414.269 | LP414.27_ |
| 867044.9  | 523474.8  | 525418.2  | 628404    | 804649.9  | 625024.1  | 691702.3  | 822302    | 441760.3  | 932147.8  |
| 674629    | 775877.4  | 519183.1  | 764162.7  | 824545.4  | 737592.2  | 840503.2  | 620678    | 487108.6  | 599957.8  |
| 945831.5  | 785730.5  | 558878.7  | 588290.2  | 782168    | 875840    | 966632.8  | 830797.4  | 556143    | 1099157   |
| 814535.9  | 565129.4  | 626211.7  | 592156.5  | 722460.6  | 639721.8  | 903083.9  | 638517    | 793920.4  | 528009.9  |
| 567372.7  | 599090.8  | 766107.4  | 821149.1  | 692962.4  | 534238.5  | 708490    | 722656.2  | 641942.9  | 695267    |



|           |           |           |           |           |           |           |           |           |           |
|-----------|-----------|-----------|-----------|-----------|-----------|-----------|-----------|-----------|-----------|
| LP414.27_ | LP414.269 | LP414.269 | LP414.27_ | LP414.27_ | LP414.269 | LP414.269 | LP414.269 | LP414.27_ | LP414.269 |
| 628704.4  | 3010562   | 1149648   | 617836.7  | 815717.1  | 1967925   | 680270.5  | 1411253   | 1133736   | 830360.2  |
| 497184.3  | 1163321   | 726943.5  | 718044.2  | 861839.3  | 1187538   | 712253.4  | 1621132   | 997749    | 605263.3  |
| 630554.4  | 1168359   | 592163.6  | 471713.5  | 949532.7  | 1137284   | 518076.1  | 1223995   | 684640.9  | 790354.7  |
| 888203    | 1687374   | 592468    | 563811.9  | 806236.6  | 1245482   | 483418.5  | 1290675   | 786430.9  | 832250.3  |
| 651222    | 1243163   | 775903.9  | 536056.3  | 828004.7  | 2069066   | 608409.7  | 850315.7  | 1313713   | 824304.1  |

|            |           |            |            |           |           |            |            |           |            |
|------------|-----------|------------|------------|-----------|-----------|------------|------------|-----------|------------|
| LP414.27_! | LP414.269 | LP414.27_! | LP414.27_! | LP414.269 | LP414.269 | LP414.27_! | LP414.27_! | LP414.270 | LP414.27_! |
| 860044.7   | 543186.9  | 668972     | 565520.2   | 805149.3  | 2465390   | 825081     | 980242.7   | 1030159   | 887575.6   |
| 1441056    | 506243.7  | 729230.9   | 497697.2   | 554108.7  | 1941829   | 633705.8   | 974911     | 981039.1  | 1069001    |
| 715056.3   | 597293.2  | 874341.4   | 627887.4   | 843000.1  | 1390440   | 1196226    | 970286.2   | 921084.2  | 697482.7   |
| 839108.1   | 517440.2  | 794488     | 659428.1   | 576110.3  | 1349546   | 780107.6   | 802729.5   | 827925.6  | 1080854    |
| 1532439    | 527461.5  | 759522.3   | 705266.2   | 644775.9  | 1525023   | 663186.9   | 693970.4   | 1151078   | 1000295    |

|           |           |           |           |           |           |           |           |           |           |
|-----------|-----------|-----------|-----------|-----------|-----------|-----------|-----------|-----------|-----------|
| LP414.27_ | LP414.27_ | LP414.269 | LP414.269 | LP414.27_ | LP414.27_ | LP414.27_ | LP414.27_ | LP414.27_ | LP414.270 |
| 952020.2  | 806127.5  | 832790.4  | 691325    | 815958.2  | 750271.8  | 795598.4  | 870513.3  | 685500.7  | 946887.6  |
| 705555.1  | 704605.3  | 619590.7  | 736168    | 1137746   | 609648.2  | 773625.7  | 985195.7  | 616751.8  | 758611.3  |
| 785912.8  | 692669.1  | 703322.5  | 1023818   | 992948.7  | 838061.3  | 870138.4  | 919069.7  | 510574.5  | 887437.5  |
| 1038815   | 1158588   | 621976.1  | 601162.3  | 900394.8  | 1023815   | 888041.1  | 730896.3  | 657944.1  | 744581.3  |
| 863516.8  | 795994    | 798656.6  | 835354.1  | 1001877   | 1090120   | 1060511   | 1087619   | 641049    | 1059430   |

|            |            |            |            |            |            |            |            |            |            |
|------------|------------|------------|------------|------------|------------|------------|------------|------------|------------|
| LP414.27_! | LP414.27_! | LP414.269! | LP414.27_! | LP414.27_! | LP414.27_! | LP414.27_! | LP414.27_! | LP414.270! | LP414.27_! |
| 578804.3   | 586775.8   | 697747.7   | 573590     | 601864.1   | 641377.8   | 457651     | 628248.3   | 780004.1   | 588877.4   |
| 485204.3   | 551757.9   | 849726.4   | 624278.6   | 477395.7   | 640640.4   | 591771.6   | 613559.3   | 629758.7   | 363350.4   |
| 676644.6   | 741956.3   | 992087.8   | 402248.3   | 443465.1   | 605982     | 817987.5   | 900628.4   | 486197.4   | 520320.4   |
| 557192.9   | 555155.7   | 835005.6   | 594372.9   | 372793.2   | 559144.7   | 507758.1   | 625015.9   | 531044.8   | 502033.9   |
| 732582.2   | 611091.7   | 652731.2   | 794298.6   | 505645.2   | 638076.5   | 761144.4   | 644005     | 533775.5   | 418338.6   |

|            |            |            |            |            |            |            |            |            |            |
|------------|------------|------------|------------|------------|------------|------------|------------|------------|------------|
| LP414.27_! | LP414.27_! | LP414.27_! | LP414.269! | LP414.269! | LP414.27_! | LP414.27_! | LP414.27_! | LP414.269! | LP414.27_! |
| 1004491    | 541259.2   | 655626.5   | 570995.6   | 1262968    | 662008.1   | 663645.4   | 557173.3   | 584234.1   | 669441.8   |
| 663663.9   | 717652.6   | 551769.2   | 674776.5   | 1438991    | 641313.4   | 1236328    | 511810     | 519753.1   | 782210.8   |
| 807590.8   | 590436.9   | 517569.3   | 502373.9   | 1344273    | 718699.2   | 725938     | 647473.2   | 422376     | 753398.2   |
| 593334.9   | 577657.4   | 489983.7   | 568063.9   | 1385935    | 479175.8   | 785941.9   | 580567.1   | 506274.6   | 593644.6   |
| 958706.2   | 498798.7   | 428408.9   | 725582.5   | 1328587    | 515757.6   | 623479.2   | 543617     | 542453.3   | 856500.5   |

|           |           |           |           |           |           |           |           |           |           |
|-----------|-----------|-----------|-----------|-----------|-----------|-----------|-----------|-----------|-----------|
| LP414.27_ | LP414.269 | LP414.269 | LP414.269 | LP414.269 | LP414.269 | LP414.27_ | LP414.270 | LP414.270 | LP414.270 |
| 567099    | 590348.5  | 70678.89  | 80827.99  | 96207.71  | 107953.5  | 94549.51  | 58359.72  | 59373.98  | 130217.3  |
| 536745.2  | 501343.3  | 71806.69  | 75922.27  | 98234.95  | 84985.73  | 89280.74  | 56734.21  | 49956.96  | 128303    |
| 582089.3  | 487453.3  | 66542.32  | 76075.04  | 96747.7   | 101967.1  | 88572.14  | 54094.58  | 56034.67  | 136206.2  |
| 458270    | 467400.6  | 74076.34  | 97031.15  | 97738.74  | 113618.4  | 92278.9   | 48033.07  | 54171.14  | 136911.2  |
| 776649.8  | 467014.7  | 64106.65  | 79866.21  | 92672.38  | 108958.6  | 98359.95  | 57137.19  | 59873.28  | 143030    |

|           |           |           |           |           |           |           |           |           |           |
|-----------|-----------|-----------|-----------|-----------|-----------|-----------|-----------|-----------|-----------|
| LP414.269 | LP414.27_ | LP414.270 | LP414.27_ | LP414.270 | LP414.270 | LP414.270 | LP414.358 | LP414.357 | LP414.369 |
| 74219.5   | 76723.39  | 62183.56  | 142688.5  | 63651.86  | 62961.36  | 54274.69  | 119850.3  | 58767.36  | 28905.27  |
| 63700.95  | 73484.3   | 73699.65  | 138400.9  | 53596.77  | 61425.82  | 55372.23  | 130911.2  | 78345.79  | 30804.54  |
| 58923.47  | 79004.13  | 61051.12  | 131943.3  | 61143.34  | 54830.44  | 52535.92  | 116528.7  | 70639.42  | 28044.97  |
| 68095.19  | 80207.95  | 61270.18  | 134948.4  | 56662.92  | 62265.99  | 63968.02  | 116548.2  | 68240.77  | 26604.69  |
| 76645.31  | 86320.68  | 61051.31  | 163400.9  | 66507.85  | 65379.42  | 59013.65  | 154129.5  | 91740.86  | 27135.87  |

|           |           |           |           |           |           |           |           |           |           |
|-----------|-----------|-----------|-----------|-----------|-----------|-----------|-----------|-----------|-----------|
| LP415.194 | LP415.193 | LP415.194 |
| 107279.7  | 201338    | 151053.1  | 113154.9  | 126445.8  | 145257.6  | 131129.7  | 110699.6  | 121787.8  | 158759    |
| 77802.42  | 152705.5  | 102319.8  | 175158.8  | 142291.5  | 187288.4  | 233191.7  | 95986.69  | 152604.4  | 243563.8  |
| 149774.3  | 197872.6  | 128041    | 111209.8  | 166574.3  | 179173    | 113120.8  | 160240.1  | 79634.92  | 168211.6  |
| 78539.63  | 151562.7  | 191020.9  | 90055.83  | 131073.2  | 157219.8  | 95269.74  | 102915.9  | 98880.08  | 205669.7  |
| 119984.9  | 152116    | 135880.5  | 155275    | 145803.1  | 137037.7  | 147060.2  | 137271.6  | 125852.2  | 133917    |



|           |           |           |           |           |           |           |           |           |           |
|-----------|-----------|-----------|-----------|-----------|-----------|-----------|-----------|-----------|-----------|
| LP415.194 |
| 145770    | 50364.57  | 189587.8  | 222541.7  | 57721.38  | 111033.9  | 36828.55  | 73245.82  | 132597.2  | 109375.6  |
| 118257.7  | 75815.23  | 238228.6  | 110607.9  | 97875.6   | 105188.7  | 91514.79  | 101257.8  | 197330.1  | 171044.3  |
| 140791    | 44028.07  | 190738.8  | 202110.5  | 105330.4  | 114918.6  | 97232.52  | 103883.5  | 110049.8  | 73543.23  |
| 93936.9   | 22666.61  | 111037    | 113114.8  | 48399.67  | 78459.11  | 33037.81  | 57767.74  | 112857.3  | 93222.56  |
| 126804.1  | 41125.09  | 134339.1  | 105836.4  | 42757.99  | 124818.6  | 35360.39  | 41675.77  | 110255    | 113924.4  |

|           |           |           |           |           |           |           |           |           |           |
|-----------|-----------|-----------|-----------|-----------|-----------|-----------|-----------|-----------|-----------|
| LP415.194 |
| 51476.92  | 114244.8  | 33116.05  | 58652.2   | 230959.3  | 128882.4  | 117273.9  | 122332.3  | 46665.72  | 56647.5   |
| 85033.04  | 215942    | 68585.7   | 97021.4   | 158566.3  | 156771.7  | 141437.7  | 182421.5  | 85813.14  | 104739.3  |
| 76363.46  | 212397.9  | 77792.37  | 37166.98  | 204984.5  | 164305.6  | 143487    | 151710.4  | 40196.13  | 113156.1  |
| 29024.61  | 79569.96  | 28769.28  | 37102.24  | 199985.8  | 172685.4  | 145462.6  | 104926.5  | 33467.17  | 45468.18  |
| 73147.74  | 92316.52  | 24930.16  | 47880.62  | 192810.7  | 134770.6  | 160441.3  | 132869.7  | 40437.98  | 56491.88  |

|           |           |           |           |           |           |           |           |           |           |
|-----------|-----------|-----------|-----------|-----------|-----------|-----------|-----------|-----------|-----------|
| LP415.194 |
| 249962    | 201041.1  | 319069    | 272298.4  | 100414.9  | 166701.6  | 42077.27  | 59208.15  | 314789.7  | 96833.83  |
| 327785    | 209666.8  | 179283.2  | 248509.1  | 174603.2  | 121031.5  | 82040.8   | 103738.1  | 325069.3  | 92280.07  |
| 178257.4  | 208310.3  | 342472.4  | 149598.3  | 89064.5   | 157421.3  | 33375.95  | 105672.6  | 365094.6  | 36295.43  |
| 308645.7  | 228193.9  | 321221.5  | 157042.5  | 92737.07  | 124769.6  | 76432.18  | 51436.04  | 176104.7  | 40009.69  |
| 194831.3  | 232927.4  | 149690.6  | 251184    | 95321.05  | 108166.9  | 34419.48  | 102221.2  | 205320.3  | 42108.66  |

|           |           |           |           |           |           |           |           |           |           |           |
|-----------|-----------|-----------|-----------|-----------|-----------|-----------|-----------|-----------|-----------|-----------|
| LP415.194 | LP415.194 | LP415.194 | LP415.193 | LP415.194 |
| 150828.2  | 257197.2  | 212935.3  | 185012.2  | 50817.77  | 287770.1  | 332872.5  | 320760.1  | 158391    | 145830.2  |           |
| 266060.5  | 199344.8  | 337766.6  | 218080.9  | 86451.59  | 261324.7  | 189337.9  | 329180.2  | 123008.7  | 269843.6  |           |
| 268705.3  | 189046.5  | 258844.8  | 294604    | 38453.75  | 162771.8  | 272749.8  | 333601.1  | 149668.1  | 261678.3  |           |
| 265770.6  | 290187.1  | 317745.2  | 229934.2  | 41826.93  | 267928.1  | 145030.6  | 191032.6  | 148533.7  | 228318.7  |           |
| 197171.4  | 199545.1  | 312441.4  | 144248.2  | 51362.61  | 137505.3  | 350161.4  | 189035.2  | 87209.51  | 242657.1  |           |

|           |           |           |           |           |           |           |           |           |           |
|-----------|-----------|-----------|-----------|-----------|-----------|-----------|-----------|-----------|-----------|
| LP415.194 |
| 337387.4  | 207022.3  | 328310.4  | 183475.7  | 329503.9  | 217873.3  | 161003.6  | 380845.2  | 153559.3  | 271983.9  |
| 154302    | 351935    | 246127.3  | 131663.1  | 294026.8  | 129178    | 134451.1  | 211430.5  | 344789.2  | 207729.3  |
| 280666.8  | 168273.6  | 361957.3  | 203392.3  | 144586.9  | 339987.9  | 283294.9  | 200968    | 356946.9  | 279749.1  |
| 205445.3  | 191467.7  | 393512.7  | 116604.2  | 305098.3  | 336921.9  | 290194.6  | 207717.4  | 129926.7  | 253677.7  |
| 312068.1  | 363448.3  | 215478.3  | 127290.6  | 173213.2  | 325576.7  | 150333.3  | 198558.4  | 345893.8  | 146098.5  |

|           |           |           |           |           |           |           |           |           |           |
|-----------|-----------|-----------|-----------|-----------|-----------|-----------|-----------|-----------|-----------|
| LP415.194 | LP415.193 | LP415.194 | LP415.194 |
| 203359.7  | 234336    | 287981.1  | 254666.9  | 146951.9  | 205965.8  | 156990.2  | 288314.5  | 361595.9  | 242147.3  |
| 126173.3  | 229394.5  | 165076.1  | 221363.1  | 162374.6  | 376139.1  | 272623.6  | 126520.9  | 369251.8  | 481460.2  |
| 201933.4  | 136627.3  | 279310.9  | 507609.6  | 169961    | 369842.7  | 268173.9  | 290659.6  | 377240.3  | 432659.1  |
| 117758.1  | 138946.3  | 188644.2  | 448467.8  | 113443    | 389152.3  | 276433.2  | 291916.7  | 347250.5  | 458904.9  |
| 135988.9  | 234938.4  | 279164.6  | 451130    | 126610.9  | 197094.9  | 180094.4  | 287431.7  | 132800.4  | 211290.8  |

|           |           |           |           |           |           |           |           |           |           |
|-----------|-----------|-----------|-----------|-----------|-----------|-----------|-----------|-----------|-----------|
| LP415.194 | LP415.194 | LP415.194 | LP415.194 | LP415.211 | LP415.211 | LP415.211 | LP415.211 | LP415.211 | LP415.211 |
| 627619.4  | 489467.4  | 437977.1  | 219442.3  | 257547.9  | 244130.8  | 586950.2  | 359917    | 534837    | 273844.1  |
| 258349.4  | 191964    | 427712.6  | 218755.1  | 200861.6  | 321649.7  | 454912.2  | 361353.6  | 404929.1  | 308428.6  |
| 271275.1  | 460624.4  | 427247.6  | 224381.1  | 226398.7  | 264525.7  | 531899.5  | 259796.6  | 522778.4  | 269915.1  |
| 682407.1  | 262866.8  | 431618.1  | 208338.6  | 356702.5  | 295236.3  | 345140.9  | 501041.4  | 541579.5  | 377983.1  |
| 315810    | 287393.2  | 207747.1  | 215713.5  | 269219.9  | 397042.1  | 503363.1  | 356347.2  | 374986.2  | 241338.8  |

|           |           |           |           |           |           |           |           |           |           |
|-----------|-----------|-----------|-----------|-----------|-----------|-----------|-----------|-----------|-----------|
| LP415.211 |
| 362984.1  | 516723.1  | 432514.6  | 290287.7  | 381355.5  | 708709.9  | 277483.4  | 341217.3  | 362613.3  | 430172.8  |
| 398456.9  | 505426    | 543540.1  | 260278.4  | 409519.7  | 542937.6  | 279556.1  | 373964.7  | 263877.2  | 355382    |
| 298525.8  | 507410.8  | 388451.8  | 272322.7  | 398064.2  | 625400    | 429197.8  | 340345.8  | 381323.5  | 276584.5  |
| 340047.6  | 691801.1  | 472331.5  | 492187.2  | 480897.7  | 777661.2  | 434858.3  | 298649.9  | 231036    | 389417.5  |
| 336563.8  | 587488.4  | 615471.5  | 267427    | 423685.8  | 470389.2  | 262454.1  | 199819    | 260290.6  | 499458.3  |



|           |           |           |           |           |           |           |           |           |           |
|-----------|-----------|-----------|-----------|-----------|-----------|-----------|-----------|-----------|-----------|
| LP415.211 |
| 401892.3  | 392806.5  | 465553.4  | 281201.1  | 195763.8  | 497018.8  | 239347.6  | 378943.2  | 256110.6  | 187154.5  |
| 457406.6  | 356933.1  | 627504.5  | 257576.9  | 199562.2  | 506660.1  | 250000.8  | 447103.8  | 248519.2  | 186765.5  |
| 383552.5  | 394702.7  | 388743    | 315189.4  | 197859.7  | 490679.4  | 249341.1  | 335638.5  | 191401.4  | 179850.9  |
| 524843.2  | 613113.6  | 540907.6  | 258231.8  | 183150.6  | 625664.4  | 253579.8  | 335461.7  | 246841.4  | 190498.4  |
| 384517.8  | 322903.7  | 415973.9  | 273774.9  | 189068.8  | 466807.5  | 254362.4  | 358630.4  | 245777.1  | 172810.1  |

|           |           |           |           |           |           |           |           |           |           |
|-----------|-----------|-----------|-----------|-----------|-----------|-----------|-----------|-----------|-----------|
| LP415.211 | LP415.211 | LP415.211 | LP415.211 | LP415.212 | LP415.211 | LP415.211 | LP415.212 | LP415.211 | LP415.211 |
| 278991.5  | 372715.4  | 397114.3  | 256832.5  | 358706.6  | 400074.9  | 287286.5  | 480837.2  | 332578.6  | 399160.4  |
| 240984.6  | 372705    | 405158.5  | 485809.1  | 367045.4  | 320027.2  | 272483.4  | 494308.3  | 357118.4  | 358897    |
| 260639.1  | 242849.6  | 414492.7  | 414419.1  | 378521.5  | 382137.5  | 285798    | 452975.5  | 363006.4  | 402200.4  |
| 317961.9  | 268330.7  | 410262.2  | 407250.8  | 396273.8  | 372360.2  | 273860.5  | 560961.9  | 338043.1  | 357042.2  |
| 256110.5  | 338728.3  | 415446.8  | 406797.5  | 378107.8  | 402904.8  | 326327.8  | 432382.4  | 345896.4  | 351272.8  |

|           |           |           |           |           |           |           |           |           |           |
|-----------|-----------|-----------|-----------|-----------|-----------|-----------|-----------|-----------|-----------|
| LP415.211 | LP415.212 | LP415.211 | LP415.211 | LP415.211 | LP415.212 | LP415.211 | LP415.211 | LP415.211 | LP415.211 |
| 350075.6  | 378408.4  | 250835.4  | 341158.6  | 281077.8  | 184802.8  | 326773.4  | 172322.1  | 225771.5  | 274685    |
| 333172.1  | 379884.6  | 263283.8  | 203903.1  | 277549.8  | 192324.4  | 304188    | 187379.1  | 217168.6  | 244719.9  |
| 340245.1  | 372293.9  | 265367.3  | 215313.9  | 283673.5  | 181177.2  | 312057.5  | 170000.7  | 208947.7  | 240371.3  |
| 320314.9  | 423476.9  | 258572.3  | 217626.1  | 260080.1  | 196272.9  | 299482    | 167319.7  | 188459.6  | 235777.4  |
| 376316.3  | 361786.6  | 254353.5  | 210926.9  | 261999.3  | 195026    | 296956.7  | 175700.7  | 181928.6  | 213628.8  |

|           |           |           |           |           |           |           |           |           |           |
|-----------|-----------|-----------|-----------|-----------|-----------|-----------|-----------|-----------|-----------|
| LP415.211 |
| 190522    | 238828.8  | 146179.9  | 283684.8  | 231493.4  | 269758.1  | 209812.4  | 200143.1  | 190944    | 133830.4  |
| 195028.8  | 244716.8  | 151677.5  | 293091.5  | 253811    | 259770.3  | 278224.9  | 208956.6  | 205680.3  | 137438.7  |
| 198539.8  | 244065.7  | 166217.1  | 273291.1  | 248948.3  | 264728.1  | 212514.2  | 206996    | 191136.4  | 134948.8  |
| 185093.1  | 241129.3  | 153211.8  | 297430.4  | 248064.4  | 258069.1  | 197736.8  | 206004.6  | 233439.6  | 121633.8  |
| 189771.7  | 251757.4  | 133502.2  | 290316.2  | 300403.3  | 266206.2  | 200483.8  | 205041.6  | 193510.9  | 136514.3  |

|           |           |           |           |           |           |           |           |           |           |
|-----------|-----------|-----------|-----------|-----------|-----------|-----------|-----------|-----------|-----------|
| LP415.211 | LP415.232 | LP415.236 | LP415.232 | LP415.272 | LP415.272 | LP415.272 | LP415.272 | LP415.272 | LP415.272 |
| 129658.8  | 304362.4  | 278283.7  | 532325.7  | 63519.49  | 88694.85  | 66594.76  | 118045.9  | 92765.94  | 137665.5  |
| 153526.4  | 293395    | 289003.6  | 537873.8  | 64167.93  | 86543.42  | 54864.81  | 131407.9  | 75390.12  | 123939.9  |
| 150110.5  | 279428.1  | 290081.6  | 540080.6  | 57651.59  | 92265.41  | 66203.11  | 131569.6  | 80144.95  | 115500.8  |
| 126117.9  | 309830.3  | 289940.3  | 490118.3  | 58036.66  | 83689.99  | 61763.61  | 131164.3  | 78840.39  | 120003.4  |
| 145349.6  | 265211.1  | 303704    | 490372.9  | 67235.49  | 76429.73  | 63162.55  | 133246    | 83205.89  | 126793.9  |

|           |           |           |           |           |           |           |           |           |           |
|-----------|-----------|-----------|-----------|-----------|-----------|-----------|-----------|-----------|-----------|
| LP415.272 | LP415.272 | LP415.272 | LP415.272 | LP415.272 | LP415.273 | LP415.273 | LP415.341 | LP415.341 | LP415.361 |
| 78930.18  | 113634.6  | 263296.6  | 235629.3  | 178557.8  | 182598.1  | 192307.1  | 264967.1  | 64122.13  | 21703.22  |
| 69576.98  | 99022.33  | 243235.2  | 223577.6  | 195284.3  | 167240.8  | 195126.9  | 261388    | 76134.56  | 21174.08  |
| 67989.94  | 106150.3  | 237449.2  | 217803.2  | 184855.5  | 170884.8  | 183831.8  | 242342.4  | 71071.9   | 19503.31  |
| 72854.53  | 110747.9  | 198754.3  | 215492.1  | 192818.5  | 167290.6  | 204667.9  | 213584.6  | 63561.81  | 18910.66  |
| 74142.01  | 92716.02  | 258721.1  | 225657.5  | 182657.8  | 176073.8  | 175962.9  | 216676    | 63600.5   | 23004.2   |

|           |           |           |           |           |           |           |           |           |           |
|-----------|-----------|-----------|-----------|-----------|-----------|-----------|-----------|-----------|-----------|
| LP415.389 | LP415.444 | LP416.198 | LP416.214 | LP416.215 | LP416.215 | LP416.214 | LP416.214 | LP416.214 | LP416.214 |
| 42330.07  | 64384.71  | 51027.06  | 95832.05  | 139083    | 140646.2  | 70089.19  | 104868.9  | 90336.52  | 79945.58  |
| 42759.55  | 57753.01  | 134097.7  | 110589.7  | 177346.2  | 135012.1  | 77219.27  | 84988.41  | 95606.07  | 74524.81  |
| 24155.63  | 81387.15  | 131108.9  | 101954.5  | 133235.8  | 122658.3  | 77326.91  | 83222.59  | 125163    | 75651.59  |
| 15842.6   | 75169.11  | 127130.6  | 103560.5  | 109037.3  | 163083.2  | 57471.03  | 87900.45  | 99444.35  | 75969.17  |
| 14511.07  | 50445.42  | 120018.7  | 77474.61  | 119502.6  | 103207.9  | 91524.29  | 143441.7  | 91858.86  | 78167.11  |

|            |            |            |           |            |           |            |            |            |            |
|------------|------------|------------|-----------|------------|-----------|------------|------------|------------|------------|
| LP416.214' | LP416.214' | LP416.214' | LP416.215 | LP416.214' | LP416.215 | LP416.214' | LP416.214' | LP416.214' | LP416.214' |
| 156817.6   | 71853.01   | 129688.4   | 156003.7  | 126462.3   | 120559.6  | 87741.92   | 108526.6   | 109678     | 101776.2   |
| 123383.3   | 146386.4   | 121333     | 152643    | 127558.1   | 140685.5  | 84803.75   | 111251.8   | 118322.5   | 122021     |
| 122763.2   | 71616.66   | 108564.9   | 105319.4  | 99131.28   | 94569.79  | 86464.21   | 121865.8   | 98577.75   | 95472.28   |
| 157426.1   | 62778.55   | 189208.1   | 190948.3  | 103998.6   | 197097    | 84200.32   | 98160.41   | 100338.9   | 96149.53   |
| 142646     | 105932.3   | 86811.55   | 153930.6  | 149623.7   | 109424.3  | 77741.69   | 113797     | 98590.29   | 101427.8   |



|            |           |            |            |           |           |            |            |            |           |
|------------|-----------|------------|------------|-----------|-----------|------------|------------|------------|-----------|
| LP416.214\ | LP416.215 | LP416.214\ | LP416.214\ | LP416.215 | LP416.215 | LP416.214\ | LP416.214\ | LP416.214\ | LP416.215 |
| 104330.7   | 93203.46  | 74079.75   | 121833.3   | 87513.18  | 107768.9  | 90151.24   | 118854.9   | 62265.82   | 89210.66  |
| 82692.11   | 116603.6  | 78797.24   | 108661.3   | 80428.45  | 97591.15  | 85982.66   | 113417.8   | 67853.82   | 84641.75  |
| 82356.9    | 108106.9  | 72061.66   | 82460.26   | 80697.02  | 90524.16  | 81850.93   | 113109.5   | 57110.99   | 80159     |
| 98972.57   | 101525.4  | 67789.33   | 111353.8   | 88551.4   | 118669.2  | 90699.2    | 104453.1   | 56827.12   | 78126.34  |
| 75409.24   | 95386.57  | 70719.07   | 88360.5    | 95067.12  | 105744.2  | 84305.4    | 116164.5   | 64880.04   | 82079.64  |

|           |           |           |           |           |           |           |           |           |           |
|-----------|-----------|-----------|-----------|-----------|-----------|-----------|-----------|-----------|-----------|
| LP416.215 | LP416.214 | LP416.215 | LP416.214 |
| 135948.9  | 96610.67  | 95957.85  | 81405.69  | 74333.44  | 98045.68  | 63994.25  | 64658.16  | 102854.3  | 72027.81  |
| 134327.2  | 104322.7  | 100794.4  | 79969.66  | 72460.07  | 117846.5  | 65600.39  | 56066.83  | 97631.13  | 65593.02  |
| 144269.9  | 98529.41  | 95818.69  | 84567.12  | 77129.43  | 96044.86  | 55702.48  | 63484.76  | 102203.1  | 52246.36  |
| 132941.9  | 95259.98  | 100196.3  | 82519.78  | 80839.99  | 82625.91  | 57700.57  | 67993.15  | 97454.64  | 70912.51  |
| 141280.2  | 85659.25  | 100467.3  | 88034.63  | 92603.37  | 86013.31  | 67488.46  | 59346     | 92176.37  | 65394.55  |

|           |           |           |           |           |           |           |           |           |           |
|-----------|-----------|-----------|-----------|-----------|-----------|-----------|-----------|-----------|-----------|
| LP416.214 | LP416.214 | LP416.214 | LP416.214 | LP416.214 | LP416.215 | LP416.214 | LP416.214 | LP416.214 | LP416.214 |
| 96390.9   | 58632.88  | 98189.93  | 69832.22  | 85007.39  | 108052.5  | 83085.59  | 98932.48  | 84754.09  | 53113.54  |
| 101149    | 61740.27  | 97419.39  | 75675.64  | 84853.77  | 103757    | 76141.83  | 98134     | 92070.38  | 51761.22  |
| 90744.24  | 55384.45  | 99701.88  | 76905.86  | 93171.53  | 72228.38  | 77461.59  | 97665.62  | 93064.05  | 60288.23  |
| 86095.4   | 55684.75  | 88441.18  | 69203.06  | 84325.46  | 105537    | 74676.55  | 94783.1   | 77664.7   | 51420.98  |
| 103975.6  | 59157.22  | 82694.62  | 73818.87  | 87886.99  | 105678.3  | 71660.03  | 120853.2  | 78190.37  | 52136.29  |

|           |           |           |           |           |           |           |           |           |           |
|-----------|-----------|-----------|-----------|-----------|-----------|-----------|-----------|-----------|-----------|
| LP416.214 |
| 67224.29  | 50452.7   | 77410.13  | 60547.42  | 64980.99  | 67257.3   | 67391.25  | 88043.99  | 62811.69  | 51246.43  |
| 65669.5   | 51960.49  | 79491.44  | 60567.36  | 66230.93  | 62025.22  | 65976.48  | 85351.64  | 57710.89  | 62207.84  |
| 64576.55  | 49548.19  | 79771.85  | 55515.9   | 61734.12  | 81980.12  | 71170.16  | 79625.36  | 50861.97  | 61831.93  |
| 64950.59  | 51143.12  | 81073.34  | 55430.97  | 64102.62  | 63211.44  | 64752.4   | 76832.72  | 59680.79  | 53227.23  |
| 61842.9   | 58475.26  | 82514.88  | 60526.67  | 60397.88  | 64595.1   | 62164.42  | 82163.95  | 59356.36  | 54939     |

|           |           |           |           |           |           |           |           |           |           |           |
|-----------|-----------|-----------|-----------|-----------|-----------|-----------|-----------|-----------|-----------|-----------|
| LP416.214 | LP416.215 | LP416.238 | LP416.300 |
| 57086.68  | 72625.16  | 69142.21  | 63110.51  | 90979.31  | 53347.53  | 62433.69  | 68977.9   | 91464.66  | 74723.08  |           |
| 60899.52  | 73507.51  | 60256.83  | 90034.85  | 60243.98  | 57401.56  | 87383.79  | 84470.28  | 68632.24  | 73915.27  |           |
| 56478.36  | 74612.15  | 64326.73  | 73977.98  | 96216.52  | 55060.34  | 62143.63  | 63284.31  | 93418.07  | 80223.94  |           |
| 57076.17  | 64987.94  | 61850.51  | 56907.41  | 88289.41  | 60466.75  | 62243.48  | 72703.32  | 57236.29  | 79711.85  |           |
| 53434.26  | 70844.67  | 62434.33  | 83234.06  | 84248.84  | 53441.97  | 64867.74  | 62983.98  | 59297.76  | 76432.45  |           |

|           |           |           |           |           |           |           |           |           |           |
|-----------|-----------|-----------|-----------|-----------|-----------|-----------|-----------|-----------|-----------|
| LP416.300 | LP416.3_3 | LP416.300 |
| 72236.45  | 54289.2   | 64265.54  | 66883.74  | 71609.58  | 75746.76  | 65300.97  | 64497.79  | 77574.47  | 68363.5   |
| 66680.46  | 63515.14  | 63123.74  | 67984.43  | 82866.49  | 68351.06  | 69234.21  | 61155.69  | 79384.36  | 73140.72  |
| 113870.8  | 56779.36  | 60274.35  | 72314.82  | 88641.04  | 94065.56  | 69383.07  | 66694.27  | 75066.58  | 76880.75  |
| 65986.31  | 55254.36  | 63939.54  | 66103.21  | 75443.45  | 74381.57  | 68409.84  | 57821.68  | 78744.56  | 68896.14  |
| 71814.9   | 58778.31  | 61356.12  | 52815.66  | 81952.09  | 77745.45  | 69126.8   | 60922.63  | 68244.97  | 68629.13  |

|           |           |           |           |           |           |           |           |           |           |
|-----------|-----------|-----------|-----------|-----------|-----------|-----------|-----------|-----------|-----------|
| LP416.300 | LP416.300 | LP416.300 | LP416.300 | LP416.300 | LP416.301 | LP416.300 | LP416.300 | LP416.300 | LP416.300 |
| 59929     | 68663.55  | 63783.42  | 51292.6   | 62480.67  | 56767.94  | 109934.8  | 60279.21  | 56219.98  | 59052.7   |
| 62863.03  | 85311.46  | 68418.63  | 55934.09  | 65312.32  | 60602.34  | 108900.4  | 71728.07  | 58754.85  | 57915.89  |
| 61767.12  | 67183.22  | 62654.44  | 66364.18  | 104228.8  | 70096.88  | 102505.3  | 48173.78  | 59514.28  | 61668.23  |
| 58880.31  | 71501.17  | 66619.14  | 54788.92  | 63997.69  | 57911.2   | 108031.1  | 69353.88  | 51102.21  | 57371.54  |
| 96859.11  | 73830.47  | 54505.62  | 54558.25  | 61669.07  | 55492.55  | 122995.2  | 67257.04  | 49637.85  | 50298.12  |

|           |           |           |           |           |           |           |           |           |           |
|-----------|-----------|-----------|-----------|-----------|-----------|-----------|-----------|-----------|-----------|
| LP416.300 |
| 85292.02  | 73691.22  | 73788.91  | 69557.74  | 62101.24  | 52584.9   | 58745.85  | 66707.71  | 69508.76  | 69971.28  |
| 75976.41  | 60188.02  | 71039.61  | 63586.74  | 66548.34  | 53554.21  | 63697.33  | 62319.7   | 62170.62  | 80482.74  |
| 79242.36  | 71987.2   | 67858.48  | 67668.32  | 60914.21  | 51537.35  | 67708.02  | 68135.78  | 65281.84  | 73766.84  |
| 73234.6   | 68242.61  | 72218.89  | 70973.54  | 60706.72  | 55211.57  | 62965.99  | 57005.97  | 64429.43  | 66838.92  |
| 71263.59  | 63302.19  | 64402.1   | 70570.48  | 59440.43  | 48274.24  | 61202.86  | 63047.36  | 62695.29  | 66659.87  |



|           |           |           |           |           |           |           |           |           |           |
|-----------|-----------|-----------|-----------|-----------|-----------|-----------|-----------|-----------|-----------|
| LP416.300 | LP416.300 | LP416.300 | LP416.301 | LP416.300 | LP416.300 | LP416.300 | LP416.300 | LP416.300 | LP416.300 |
| 85840.98  | 68885.63  | 53564.52  | 59930.93  | 87902.54  | 88684.77  | 55644.91  | 75940.89  | 74930.05  | 79712.05  |
| 83228.99  | 75858.04  | 54825.37  | 62234.63  | 85353.84  | 93688.57  | 56931.39  | 73552.34  | 62897.1   | 82582.09  |
| 82556.88  | 64243.06  | 54186.19  | 52497.8   | 79759.8   | 86776.35  | 56140     | 70061.17  | 66761.02  | 71938.9   |
| 81789.57  | 61510.53  | 54169.92  | 51569.91  | 77286.09  | 86088.94  | 53012.62  | 72776.4   | 68201.78  | 74825.92  |
| 82076.4   | 70915.61  | 49695.8   | 55924.56  | 80202.35  | 83549.61  | 57654.22  | 69047.36  | 66814.45  | 75153.76  |

|            |            |            |            |            |            |            |            |            |            |
|------------|------------|------------|------------|------------|------------|------------|------------|------------|------------|
| LP416.300' |
| 58233.34   | 60196.47   | 63442.47   | 72046.23   | 63649.56   | 72988.19   | 56135.39   | 45811.23   | 43394.42   | 52316.31   |
| 60854.25   | 62913.74   | 61734.37   | 70362.39   | 66070.96   | 73860.91   | 64662.9    | 42640.74   | 46494.87   | 47041.31   |
| 53758.85   | 62231.58   | 58169.91   | 67553.38   | 66158.17   | 81417.47   | 59282.72   | 48710.92   | 47310.04   | 53342.4    |
| 61729.99   | 61392.27   | 59723.64   | 69731.45   | 64490.91   | 84838.58   | 52611.49   | 45313.59   | 48311.21   | 55309.16   |
| 62310.74   | 63748.16   | 61453.6    | 66341.62   | 61065.36   | 76186.37   | 52732.5    | 44296.4    | 45263.38   | 45161.3    |

|           |           |           |           |           |           |           |           |           |           |
|-----------|-----------|-----------|-----------|-----------|-----------|-----------|-----------|-----------|-----------|
| LP416.373 | LP416.374 | LP416.373 | LP416.388 | LP416.388 | LP416.392 | LP416.393 | LP416.41_ | LP417.173 | LP417.173 |
| 115952.4  | 49730.76  | 185160.3  | 42413.13  | 28297.09  | 24910.62  | 76336.01  | 35528.31  | 148084.7  | 141168    |
| 128880.2  | 54649.25  | 191174.4  | 43102.32  | 31018.13  | 26044.74  | 71538.61  | 31242.35  | 144519.9  | 118119.1  |
| 123691.5  | 53463.43  | 194514.3  | 40626.82  | 33250.66  | 28065.38  | 75369.12  | 38337.13  | 44455.69  | 32367.44  |
| 125963.6  | 46402.1   | 175817    | 38979.12  | 27438.15  | 24352.69  | 67770.23  | 27789.96  | 126696    | 130803.7  |
| 117051.3  | 45728.28  | 168355.5  | 40356.51  | 27480.65  | 26788.19  | 69788.48  | 30429.85  | 125736.9  | 125525.2  |

|           |           |           |           |           |           |           |           |           |           |           |
|-----------|-----------|-----------|-----------|-----------|-----------|-----------|-----------|-----------|-----------|-----------|
| LP417.209 | LP417.208 | LP417.209 |
| 76232.81  | 129396.7  | 72766.66  | 99411.76  | 134012.1  | 118670.5  | 123297.8  | 79384.69  | 85516.9   | 95797.47  |           |
| 77204.44  | 109575.6  | 75495.62  | 98035.79  | 143145.7  | 116500    | 123158.5  | 93913.04  | 91940.19  | 92977.74  |           |
| 67004.73  | 120276.6  | 72706.21  | 90767.65  | 151788.9  | 127843.6  | 123847.1  | 83482.48  | 81592.44  | 97110.29  |           |
| 67412.91  | 123725.9  | 75148.1   | 93118.62  | 137313.8  | 125207    | 114968.9  | 79812.07  | 84402.71  | 98918.85  |           |
| 75563.98  | 124383.1  | 79209.13  | 88156.96  | 140956.6  | 141531.7  | 121919.6  | 91466.85  | 79593.12  | 108859.3  |           |

|           |           |           |           |           |           |           |           |           |           |
|-----------|-----------|-----------|-----------|-----------|-----------|-----------|-----------|-----------|-----------|
| LP417.209 |
| 54744.56  | 134405.9  | 70759.02  | 72242.45  | 105122    | 95202.51  | 60181.71  | 69322.33  | 89144.7   | 152451.4  |
| 56508.56  | 138445.7  | 59827.87  | 75770.17  | 107541.2  | 98353.13  | 61229.35  | 74672.54  | 113525.4  | 154494.5  |
| 60474.51  | 131208.5  | 63008.89  | 86553.66  | 115884.7  | 97611.6   | 64734.5   | 76078.77  | 116913.4  | 147423.3  |
| 50786.58  | 124936.6  | 58536.02  | 77313.74  | 117860.9  | 94815.03  | 60017.66  | 76251.03  | 108181.8  | 144907.6  |
| 60193.54  | 132823.8  | 69552.07  | 70829.18  | 109054.6  | 98034.05  | 63294.98  | 89009.94  | 107503.7  | 169513.3  |

|           |           |           |           |           |           |           |           |           |           |
|-----------|-----------|-----------|-----------|-----------|-----------|-----------|-----------|-----------|-----------|
| LP417.209 |
| 100502.6  | 84597.81  | 126929.5  | 122265.7  | 85382.57  | 81750.45  | 113385    | 113236.8  | 66011.97  | 117301.9  |
| 101130.7  | 73485.73  | 120394.5  | 112815.9  | 94351.27  | 88903.32  | 113117.7  | 107304.4  | 72208.24  | 121450.8  |
| 96744.89  | 87950.02  | 113539.4  | 118874.2  | 85767.65  | 88698.59  | 112375.5  | 121451.8  | 76787.89  | 113837.9  |
| 104859.8  | 76139.53  | 117613.5  | 120679    | 83359.27  | 85278.61  | 124192.7  | 115989    | 62240.78  | 113068.3  |
| 107205.4  | 73128.48  | 109789.2  | 115422.6  | 78378.85  | 89092.81  | 116390.3  | 99097.27  | 74402.6   | 111325.9  |

|           |           |           |           |           |           |           |           |           |           |
|-----------|-----------|-----------|-----------|-----------|-----------|-----------|-----------|-----------|-----------|
| LP417.209 | LP417.209 | LP417.209 | LP417.209 | LP417.209 | LP417.21_ | LP417.209 | LP417.209 | LP417.209 | LP417.209 |
| 85035.62  | 78041.16  | 141388.2  | 81449.93  | 71706.6   | 31189.67  | 51588.14  | 117660.7  | 98841.94  | 84850.2   |
| 87895.75  | 78633.9   | 135855.4  | 80319.43  | 79608.7   | 35442.74  | 50934.51  | 114699.1  | 93627.57  | 80183.14  |
| 89241.84  | 80674.8   | 126377.9  | 73380.49  | 72346.95  | 28133.19  | 48704.2   | 117248    | 92850.09  | 85576.79  |
| 89448.03  | 85239.41  | 117680.7  | 77895.27  | 82858.15  | 25818.33  | 43761.37  | 112638.1  | 95539.04  | 77233.97  |
| 78641.77  | 84642.22  | 121777.9  | 78567.29  | 73613.23  | 28135.86  | 44501.4   | 110812.8  | 99106.01  | 82356.08  |

|           |           |           |           |           |           |           |           |           |           |
|-----------|-----------|-----------|-----------|-----------|-----------|-----------|-----------|-----------|-----------|
| LP417.209 |
| 99753.05  | 62678.4   | 89428.82  | 61641.12  | 72145.29  | 113243.8  | 60238.23  | 62137.35  | 124857.9  | 81340.92  |
| 102025.2  | 54914.31  | 93410.09  | 61695.31  | 74059.97  | 103447.2  | 62862.67  | 59815.22  | 131061.9  | 82435.92  |
| 100379.5  | 64642.61  | 91274.65  | 59300.24  | 76057.91  | 107374    | 57277.54  | 58187.71  | 121943.8  | 86021.47  |
| 95172.98  | 64055.34  | 106253.2  | 60344.56  | 68225.41  | 114055.2  | 57038.19  | 49579.79  | 126516.8  | 83206.72  |
| 104537.1  | 63423.86  | 98422.26  | 67651.8   | 75644.44  | 109609.3  | 59360.2   | 58405.55  | 132049.1  | 84579.53  |



|           |           |           |           |           |           |           |           |           |           |
|-----------|-----------|-----------|-----------|-----------|-----------|-----------|-----------|-----------|-----------|
| LP417.209 | LP417.210 |
| 78798.99  | 102085.4  | 103848.4  | 81779.44  | 58221.91  | 78018.12  | 121951    | 82772.51  | 24768.32  | 16088.74  |
| 78350.5   | 107673.5  | 99105.96  | 81622.17  | 61490.06  | 82870.04  | 129864.5  | 82440.02  | 24169.95  | 21319.33  |
| 74354.65  | 107953.5  | 113576.4  | 88306.75  | 57719.53  | 71123.34  | 120942    | 84808.89  | 25812.28  | 18423.75  |
| 63538.71  | 95511.4   | 99449.91  | 84526.99  | 55896.7   | 75426.95  | 127537    | 84928.21  | 21355.63  | 16143.95  |
| 73430.38  | 106007.1  | 108847.8  | 84429.2   | 60459.46  | 83429.15  | 129409.3  | 89557.97  | 27162.49  | 18857.92  |

|           |           |           |           |           |           |           |           |           |           |
|-----------|-----------|-----------|-----------|-----------|-----------|-----------|-----------|-----------|-----------|
| LP417.209 | LP417.209 | LP417.209 | LP417.209 | LP417.209 | LP417.21_ | LP417.209 | LP417.21_ | LP417.209 | LP417.209 |
| 55562.59  | 49662.43  | 48809.65  | 34059.22  | 127975.8  | 20728.31  | 22859.9   | 18853.97  | 88918.8   | 67150.88  |
| 62478.5   | 49024.02  | 49095.22  | 38333.49  | 119889.5  | 20220.43  | 24250.36  | 17134.11  | 93011.85  | 60412.73  |
| 51431.73  | 46631.95  | 48064.86  | 33457.64  | 126126    | 14926.57  | 19591.95  | 17223.13  | 90277.05  | 61623.51  |
| 53486.08  | 42986.82  | 48389.07  | 26285.39  | 127484.6  | 15440.05  | 18407.21  | 14646.33  | 91331.46  | 61710.24  |
| 56640.98  | 46227.99  | 46875.24  | 35328.14  | 127875.1  | 18132.73  | 25164     | 18187.06  | 90425.49  | 65484.82  |

|           |           |           |           |           |           |           |           |           |           |
|-----------|-----------|-----------|-----------|-----------|-----------|-----------|-----------|-----------|-----------|
| LP417.209 | LP417.209 | LP417.21_ | LP417.209 | LP417.210 | LP417.209 | LP417.209 | LP417.209 | LP417.209 | LP417.209 |
| 95219.86  | 105340    | 25267.55  | 56902.63  | 22424.18  | 34966.42  | 77454.82  | 109003.7  | 105210    | 35852.53  |
| 97906.41  | 107193.5  | 24819.87  | 55378.03  | 19644.38  | 34899.42  | 79345.27  | 109448.9  | 97809.38  | 38249.72  |
| 100645.4  | 105595.9  | 25577.41  | 63091.76  | 22881.22  | 29921.61  | 81204.33  | 113434    | 104096.8  | 29883.08  |
| 94661.02  | 113016.3  | 20224.26  | 56887.6   | 17654.17  | 29340.08  | 75768.84  | 108477    | 95994.09  | 26776.78  |
| 104146.8  | 112774.2  | 25319.56  | 59022.63  | 25829.63  | 34429.19  | 76404.26  | 108476.7  | 99139.7   | 31690.13  |

|           |           |           |           |           |           |           |           |           |           |
|-----------|-----------|-----------|-----------|-----------|-----------|-----------|-----------|-----------|-----------|
| LP417.209 | LP417.21_ | LP417.247 | LP417.247 | LP417.367 | LP417.368 | LP418.243 | LP418.243 | LP418.243 | LP418.243 |
| 38014.17  | 43016.75  | 151501.7  | 104042.1  | 37134.69  | 37881.53  | 58874.02  | 67962.05  | 66312.86  | 60324.75  |
| 37705.86  | 38305.33  | 34376.41  | 25525.29  | 38730.54  | 41964.41  | 66283.43  | 59135.1   | 65662.95  | 57301.07  |
| 27122.72  | 40928.04  | 154969    | 104588.2  | 38993.92  | 37290.9   | 62319.98  | 65578.59  | 59903.99  | 46257.41  |
| 30591.88  | 35764.34  | 149049.5  | 101482.6  | 28772.27  | 35229.08  | 65507.49  | 56771.55  | 63712.88  | 56035.46  |
| 35912.03  | 39873.23  | 148625.3  | 116833.9  | 26453.4   | 30617.03  | 66781.94  | 63838.15  | 64239.46  | 53959.34  |

|           |           |           |           |           |           |           |           |           |           |
|-----------|-----------|-----------|-----------|-----------|-----------|-----------|-----------|-----------|-----------|
| LP418.243 |
| 42863.71  | 61257.67  | 42028.69  | 51112.26  | 59869.83  | 54949.98  | 44136.51  | 47571.95  | 45264.43  | 61353.17  |
| 45715.89  | 60102.67  | 47649.52  | 46612.34  | 64574.2   | 54547.81  | 46488.76  | 44939.74  | 43926.8   | 61767.73  |
| 41843.08  | 59092.74  | 49047.88  | 47389.21  | 64807.63  | 52394.85  | 42450.24  | 46259.42  | 37664.78  | 61497.74  |
| 41760.63  | 58569.52  | 47087.71  | 54841.9   | 63058.82  | 51395.9   | 38990.43  | 43857.72  | 46326.86  | 64344.94  |
| 43782.81  | 67735.8   | 43404.32  | 51168.78  | 61308.06  | 54891.91  | 41409.59  | 43878.89  | 49881.79  | 63020.47  |

|           |           |           |           |           |           |           |           |           |           |
|-----------|-----------|-----------|-----------|-----------|-----------|-----------|-----------|-----------|-----------|
| LP418.243 |
| 62073.23  | 53003.16  | 39902.82  | 56942.85  | 49646.73  | 44933.33  | 45273.97  | 38463.87  | 70333.45  | 50610.04  |
| 49448.58  | 50139.29  | 45169.78  | 50297.02  | 47688.32  | 42716.75  | 38566.19  | 40167.25  | 75143.25  | 55937.27  |
| 50292.31  | 49873.87  | 41662.48  | 49823.78  | 51647.51  | 52006.71  | 39249.98  | 38634.36  | 68633.54  | 49565.46  |
| 54854.31  | 53617.73  | 41101.15  | 54105.79  | 52481.94  | 45389.94  | 39552.39  | 38070.47  | 63558.9   | 51814.08  |
| 55828.65  | 51812.22  | 44491.64  | 52114.65  | 46818.56  | 48602.68  | 38638.47  | 40538.92  | 76327.42  | 50504.15  |

|           |           |           |           |           |           |           |           |           |           |
|-----------|-----------|-----------|-----------|-----------|-----------|-----------|-----------|-----------|-----------|
| LP418.243 | LP418.279 | LP418.280 | LP418.280 |
| 58343.12  | 53980.15  | 81056.44  | 53241.31  | 36771.97  | 51286.67  | 42302.77  | 169601    | 144013.8  | 97003.95  |
| 62324.11  | 46886.26  | 81028.22  | 54824.67  | 41662.96  | 39069.94  | 35001.53  | 156846.1  | 152835    | 109246    |
| 59859.76  | 52680.02  | 75391.22  | 55114.66  | 38261.61  | 52062.25  | 35665.95  | 137090.8  | 134338.4  | 77356.53  |
| 62076.12  | 49860.7   | 71648.7   | 59686.63  | 38711.04  | 42997.89  | 34817.53  | 159182.7  | 132138.2  | 106574.7  |
| 57931.61  | 44510.83  | 69351.65  | 56824.87  | 35731.1   | 42210.32  | 34290.99  | 143068.5  | 126397.4  | 109222.5  |

|           |           |          |           |           |           |           |           |           |           |
|-----------|-----------|----------|-----------|-----------|-----------|-----------|-----------|-----------|-----------|
| LP418.279 | LP418.279 | LP418.28 | LP418.280 | LP418.279 | LP418.280 | LP418.280 | LP418.280 | LP418.280 | LP418.279 |
| 87791.8   | 132904.5  | 148757.3 | 146978.5  | 112061.2  | 122796.5  | 126597    | 98468.72  | 100318.7  | 106865.2  |
| 93565.67  | 127162.6  | 108632.3 | 137374.3  | 133789.4  | 103213.6  | 122285.1  | 93369.39  | 99940.53  | 101788.5  |
| 86447.49  | 108693.5  | 102860.1 | 148220.4  | 123670.2  | 95432.66  | 130027.2  | 111691.9  | 103808.2  | 103054    |
| 91910.62  | 115379.9  | 125197.5 | 143771.8  | 124900.7  | 107666    | 123265.9  | 97017.01  | 117688.1  | 84946.73  |
| 82637.55  | 92150.66  | 102456.9 | 147002.8  | 140979.7  | 102494.8  | 117918.6  | 102808.6  | 115903.4  | 93405.12  |



|           |           |           |           |           |           |           |           |           |           |
|-----------|-----------|-----------|-----------|-----------|-----------|-----------|-----------|-----------|-----------|
| LP418.280 |
| 110573.9  | 100295.6  | 102197.3  | 101070.8  | 98500.79  | 109771.3  | 112948.6  | 87690.86  | 125332.5  | 80656.31  |
| 106550.2  | 96344.57  | 106204.8  | 99825.39  | 102138.2  | 101964.3  | 115066.1  | 96518.3   | 117261.1  | 89872.74  |
| 103920.2  | 94747.98  | 112088.5  | 105205.2  | 92936.45  | 96172.34  | 114768.6  | 133027.1  | 116601    | 89133.46  |
| 97718.01  | 96397.58  | 120944.6  | 109005.3  | 141571.8  | 99204.94  | 133647.2  | 86384.35  | 124357.6  | 82482.48  |
| 103770.3  | 98335.59  | 112065.7  | 108246.9  | 94125.38  | 87750.38  | 109834.8  | 92188.12  | 116657.6  | 83821.58  |

|           |           |           |           |           |           |           |           |           |           |
|-----------|-----------|-----------|-----------|-----------|-----------|-----------|-----------|-----------|-----------|
| LP418.280 | LP418.280 | LP418.280 | LP418.280 | LP418.279 | LP418.280 | LP418.280 | LP418.280 | LP418.280 | LP418.280 |
| 105369.3  | 98275.94  | 93219.93  | 109627.3  | 120650.1  | 136388.8  | 61673.46  | 102253.7  | 112053.7  | 81032.72  |
| 106867.6  | 92529.17  | 93034.49  | 69852.18  | 104776.1  | 122723.3  | 67636.18  | 91407.53  | 100434.9  | 85130.41  |
| 100589.6  | 96097.48  | 88224.57  | 85192.85  | 98753.33  | 126970.8  | 63428.15  | 117737.2  | 92858.38  | 83090.63  |
| 95535.73  | 93539.29  | 88125.96  | 67056.16  | 91095.18  | 124764.8  | 59556.93  | 93209.76  | 91308.22  | 85092.01  |
| 99867.91  | 99165.59  | 85288.19  | 78566.22  | 106892.6  | 115703.6  | 59942.82  | 96853.7   | 93732.99  | 76399.11  |

|           |           |           |           |           |           |           |           |           |           |
|-----------|-----------|-----------|-----------|-----------|-----------|-----------|-----------|-----------|-----------|
| LP418.279 | LP418.280 |
| 105994    | 133425.2  | 80134.69  | 121053.8  | 85622.72  | 102232.9  | 60458.44  | 91098.99  | 63501.36  | 84424.6   |
| 103988.1  | 135336.6  | 83604.86  | 114237.4  | 83497.5   | 97368.24  | 57207.89  | 98703.33  | 63589.97  | 70555.96  |
| 114295.1  | 157104.9  | 81552.04  | 123627.1  | 75383.71  | 101326.9  | 53522.35  | 97845.81  | 63392.33  | 82085.01  |
| 111863.5  | 146779.6  | 80925.16  | 121806.9  | 85341.32  | 85707.03  | 54103.5   | 98370.94  | 58410.58  | 79917.35  |
| 102422.3  | 134857.4  | 83967.88  | 126785.7  | 83041.84  | 98049.92  | 62253.33  | 102758.1  | 57050.29  | 83309.1   |

|           |           |           |           |           |           |           |           |           |           |
|-----------|-----------|-----------|-----------|-----------|-----------|-----------|-----------|-----------|-----------|
| LP418.280 | LP418.316 | LP418.316 | LP418.317 |
| 87806.8   | 86978.67  | 115116.1  | 125354.9  | 110085.1  | 129944.8  | 67907.81  | 136377    | 170711.3  | 96121.66  |
| 82147.6   | 75583.85  | 114017.6  | 125783.8  | 113284    | 121056.8  | 69634.57  | 132902.4  | 104560    | 93523.87  |
| 92872.36  | 84212.18  | 111154.3  | 121404.1  | 115103.2  | 117213.9  | 60553.98  | 125609.1  | 167765.7  | 96719.6   |
| 88357.38  | 86949.36  | 109072.6  | 122736.7  | 107138.5  | 117407.9  | 65596.44  | 126119.5  | 173519.2  | 93875.93  |
| 86121.22  | 80339.78  | 112882.4  | 119103.7  | 111997.7  | 115181.5  | 70576.63  | 124494.2  | 160753.3  | 96534.92  |

|           |           |           |           |           |           |           |           |           |           |
|-----------|-----------|-----------|-----------|-----------|-----------|-----------|-----------|-----------|-----------|
| LP418.317 | LP418.316 | LP418.316 | LP418.316 | LP418.316 | LP418.352 | LP418.352 | LP418.353 | LP418.353 | LP418.353 |
| 73349.54  | 101287.1  | 81274.3   | 96295.78  | 87347.77  | 58012.09  | 59843.5   | 70621.21  | 47283.03  | 56445.27  |
| 77189.27  | 99053.22  | 85893.26  | 87408.85  | 58669.53  | 65117.08  | 55308.62  | 66723.41  | 40695.97  | 46888.04  |
| 66192.75  | 103400.2  | 84307.77  | 98382.17  | 93195.94  | 62445.94  | 59923.97  | 76716.49  | 45436.52  | 55919.53  |
| 70747.69  | 96861.16  | 78848.33  | 94749.74  | 90056.55  | 59885.19  | 50343.93  | 59122.17  | 44164.73  | 59784.01  |
| 69417.6   | 98132.26  | 81720.59  | 94320.34  | 92359.23  | 62863.56  | 57495.05  | 66570.02  | 43520.11  | 48843.22  |

|           |           |           |           |           |           |           |           |           |           |
|-----------|-----------|-----------|-----------|-----------|-----------|-----------|-----------|-----------|-----------|
| LP418.353 | LP418.353 | LP418.353 | LP418.353 | LP418.389 | LP418.389 | LP418.503 | LP419.189 | LP419.189 | LP419.188 |
| 36572.96  | 34451.94  | 41983.78  | 33447.17  | 50005.15  | 47739.52  | 37252.34  | 127303.4  | 226657.1  | 487741.4  |
| 34747.48  | 29927.92  | 37363.58  | 36478.77  | 51122.49  | 50888     | 39910.92  | 156141.5  | 175872.1  | 296067.3  |
| 38007.77  | 27682.7   | 35395.36  | 43436.15  | 49059.51  | 47076.52  | 38034.23  | 113415.5  | 179224.8  | 305879.4  |
| 35089.27  | 28357.72  | 30388.22  | 36566.99  | 53509.12  | 42601.47  | 29532.94  | 190535.9  | 231815.3  | 367895.5  |
| 35958.95  | 27739.33  | 33487.08  | 34459.56  | 49422.38  | 49264.41  | 35725.44  | 273024.5  | 191018.8  | 349433.1  |

|           |           |           |           |           |           |           |           |           |           |
|-----------|-----------|-----------|-----------|-----------|-----------|-----------|-----------|-----------|-----------|
| LP419.189 | LP419.188 | LP419.188 | LP419.189 | LP419.189 | LP419.189 | LP419.189 | LP419.189 | LP419.189 | LP419.188 |
| 203382.3  | 152389.3  | 198563.9  | 152868.4  | 297461.5  | 224870    | 309797.8  | 208755.8  | 279010.8  | 159138.6  |
| 154539.3  | 181920.1  | 199089    | 170934.6  | 416999.2  | 219217.5  | 386292.3  | 243625    | 316653.6  | 192884.4  |
| 183121.2  | 291856.2  | 170657.3  | 219207.8  | 304275.9  | 246979.9  | 242492.5  | 199057.5  | 290893.7  | 150809    |
| 136626.6  | 170867    | 200146    | 206306.8  | 340729    | 220583.8  | 252027.3  | 210818.6  | 321036.2  | 183445.6  |
| 167595.9  | 187073.3  | 192671.9  | 270516.4  | 376943.7  | 237093.2  | 371693.9  | 191359.5  | 305858.6  | 139929.1  |

|           |           |           |           |           |           |           |           |           |           |
|-----------|-----------|-----------|-----------|-----------|-----------|-----------|-----------|-----------|-----------|
| LP419.189 | LP419.189 | LP419.188 | LP419.188 | LP419.188 | LP419.189 | LP419.189 | LP419.189 | LP419.189 | LP419.189 |
| 308673.4  | 382947.1  | 240561.1  | 148901.8  | 201390.8  | 232068.2  | 235980.2  | 224027.3  | 389475.1  | 258363.2  |
| 413298.4  | 254318.5  | 201263.7  | 187896.4  | 429238.7  | 155329.9  | 147886.7  | 158284    | 242574.7  | 245213.8  |
| 385041.1  | 283396.7  | 177610.1  | 193359.2  | 318818.8  | 202060.1  | 147315.4  | 204376.5  | 274972.1  | 254047.2  |
| 272236.4  | 234615.3  | 200413.4  | 213453.9  | 258683.8  | 137466.4  | 223240    | 116662.6  | 276858.4  | 211764.5  |
| 272373.7  | 183592.1  | 140807.5  | 214252.9  | 185938.5  | 219224.6  | 133672.9  | 153813.8  | 246054.5  | 247476.9  |



|           |           |           |           |           |           |           |           |           |           |
|-----------|-----------|-----------|-----------|-----------|-----------|-----------|-----------|-----------|-----------|
| LP419.189 |
| 243038.7  | 238671.5  | 323123.1  | 321867    | 232430.8  | 178133    | 310178.7  | 257982.8  | 137554.9  | 135102.7  |
| 276551.4  | 196116.7  | 334684.7  | 287712.7  | 201833.6  | 216602.1  | 156402.6  | 222837.2  | 165146.8  | 135014.6  |
| 283357.4  | 299102.2  | 415727.9  | 298311    | 235315.8  | 247756.3  | 146699.4  | 298819.7  | 190895.4  | 131953.9  |
| 214424.4  | 180787.6  | 326080.6  | 251835    | 195508.7  | 222621.2  | 213790.2  | 208954.9  | 177560.5  | 162680.1  |
| 235683.3  | 159908.9  | 216904    | 237601.6  | 189884.5  | 176367.7  | 161872.9  | 221700.1  | 134905.3  | 188164.9  |

|           |           |           |           |           |           |           |           |           |           |
|-----------|-----------|-----------|-----------|-----------|-----------|-----------|-----------|-----------|-----------|
| LP419.189 |
| 194593.1  | 151728.8  | 236959.2  | 299603.1  | 230212.9  | 341039.7  | 133968.5  | 230550.9  | 197393.7  | 192404.1  |
| 247622.2  | 257015.3  | 225619.3  | 246705.7  | 231216.1  | 229730.3  | 131299.9  | 232057.9  | 212512.7  | 205548.6  |
| 196671.4  | 180339.8  | 253195.2  | 261385.1  | 360267.8  | 321478.9  | 168324.7  | 229989.4  | 204953.4  | 295351.4  |
| 216648.8  | 156247.2  | 199782.5  | 314938.3  | 258059    | 206655.7  | 125846.7  | 256082.9  | 200131.3  | 235139.1  |
| 293554.4  | 136756.7  | 264828.6  | 259921.6  | 248426    | 313953.9  | 120971    | 223270.8  | 202745.6  | 207074.6  |

|           |           |           |           |           |           |           |           |           |           |
|-----------|-----------|-----------|-----------|-----------|-----------|-----------|-----------|-----------|-----------|
| LP419.189 | LP419.188 |
| 165879.1  | 110214.3  | 118831.4  | 122236.9  | 218107.9  | 117343.5  | 173933.8  | 177353.2  | 158029.2  | 61141.75  |
| 167630.1  | 147389.5  | 109491    | 120473.8  | 318413.9  | 120891.6  | 207715    | 152031.3  | 136616.2  | 63764.09  |
| 124869    | 183969.4  | 121238.7  | 137492.3  | 256248.7  | 110754.6  | 214268.4  | 185431    | 122546.4  | 76480.93  |
| 174836.9  | 146970.8  | 167073.5  | 138685.3  | 264702.5  | 172514.5  | 190320.1  | 156333.9  | 139943.7  | 57539.1   |
| 146002.5  | 151288    | 155687.9  | 104076.7  | 371966.8  | 119421.7  | 185624.6  | 165361.9  | 149125.3  | 49821.07  |

|           |           |           |           |           |           |           |           |           |           |
|-----------|-----------|-----------|-----------|-----------|-----------|-----------|-----------|-----------|-----------|
| LP419.189 | LP419.189 | LP419.189 | LP419.189 | LP419.188 | LP419.189 | LP419.189 | LP419.189 | LP419.189 | LP419.189 |
| 172202.9  | 160156.3  | 277207    | 245742.1  | 284409.1  | 155495.7  | 165395.9  | 200828.3  | 141937.7  | 218238.4  |
| 181586.4  | 162496.7  | 247752    | 144331.9  | 199010.7  | 151260.5  | 124313.2  | 187905.6  | 147562.6  | 220695.3  |
| 131063.3  | 149311.9  | 241034    | 186617.7  | 198272.3  | 186419.1  | 118623.7  | 209106.8  | 97061.67  | 237189.6  |
| 140026.1  | 184118.4  | 285231.5  | 159148.6  | 271485    | 221082    | 110267.3  | 200458.1  | 103312.2  | 249168.8  |
| 163390.1  | 144483.8  | 311476.9  | 190264.2  | 218725    | 119145.7  | 161475.8  | 184752.2  | 109961.7  | 236381.8  |

|           |           |           |           |           |           |           |           |           |           |
|-----------|-----------|-----------|-----------|-----------|-----------|-----------|-----------|-----------|-----------|
| LP419.189 |
| 298433.8  | 68841.63  | 182443.3  | 92883.46  | 196231.9  | 245967.3  | 126027.7  | 145959.1  | 109369.4  | 145684.2  |
| 190769    | 67338.29  | 178732.6  | 97694.06  | 163124.2  | 155851.9  | 135151.4  | 124244.9  | 116015.4  | 147580.8  |
| 269359.7  | 54014.93  | 171770.3  | 98545.82  | 180212.2  | 216620.9  | 189167.2  | 163418.8  | 83926.01  | 159122.9  |
| 219299.8  | 45452.83  | 152072    | 89538.37  | 181014.4  | 225146.7  | 120644.4  | 135834.7  | 97726.16  | 132341    |
| 215020.5  | 72862.04  | 169767.6  | 111241.3  | 206704.4  | 237444.7  | 144457.6  | 115302.6  | 141541.6  | 142200.4  |

|           |           |           |           |           |           |           |           |           |           |           |
|-----------|-----------|-----------|-----------|-----------|-----------|-----------|-----------|-----------|-----------|-----------|
| LP419.189 | LP419.226 |
| 60818.75  | 139660    | 51485.44  | 60865.78  | 62523.91  | 162625.2  | 42795.41  | 103035.4  | 67430.17  | 152443.9  |           |
| 50267.03  | 132384.3  | 43441.94  | 57545.69  | 83042.59  | 161082.5  | 60462.4   | 73855.7   | 67997.62  | 31871     |           |
| 41231.48  | 135103.6  | 50865.98  | 55242.35  | 65966.31  | 156059.6  | 41591.39  | 53416.46  | 46620.39  | 152079.7  |           |
| 44860.42  | 151677.9  | 67188.17  | 62436.57  | 51519.25  | 155881.8  | 44693.23  | 55970.87  | 57357.92  | 144932.3  |           |
| 39340.02  | 136252.4  | 42579.75  | 45481.88  | 77306.82  | 161560.8  | 43263.99  | 78842.18  | 66836.82  | 154906    |           |

|           |           |           |           |           |           |           |           |           |           |
|-----------|-----------|-----------|-----------|-----------|-----------|-----------|-----------|-----------|-----------|
| LP419.240 | LP419.315 | LP419.315 | LP419.315 | LP419.315 | LP419.316 | LP419.316 | LP419.315 | LP419.315 | LP419.315 |
| 45859.26  | 4123670   | 5265570   | 174232.8  | 225356.6  | 334470.4  | 209183    | 300407.6  | 243956.6  | 211571.7  |
| 46392.1   | 4030896   | 5445324   | 201915.5  | 222330.6  | 309816.9  | 213955.1  | 276635.3  | 241869.4  | 181688.3  |
| 43726.82  | 4229779   | 5971577   | 185922.4  | 231187    | 353438.6  | 193035.3  | 304568.4  | 233522    | 214005.5  |
| 57588.59  | 4297621   | 5383300   | 178873.1  | 236729.6  | 360808.9  | 210296.8  | 302353.8  | 256167.3  | 183416.4  |
| 57825.08  | 4161221   | 5231012   | 187385.3  | 236950.6  | 354159.4  | 194772.6  | 322496.5  | 267420.4  | 213105.1  |

|           |           |           |           |           |           |           |           |           |           |
|-----------|-----------|-----------|-----------|-----------|-----------|-----------|-----------|-----------|-----------|
| LP419.315 | LP419.315 | LP419.314 | LP419.316 | LP419.315 | LP419.315 | LP419.315 | LP419.315 | LP419.315 | LP419.315 |
| 275226.5  | 258484    | 204080.2  | 216770.8  | 259247.1  | 269984    | 196076.1  | 135479.3  | 173645.6  | 176943.9  |
| 251950.3  | 250615.8  | 194824.2  | 212162.1  | 258224.3  | 268542.4  | 202307.9  | 145849    | 162747    | 172517.6  |
| 258551.2  | 241086.2  | 186153.2  | 234080.8  | 257272.9  | 281620.7  | 212824    | 134122.4  | 154363.7  | 182193.5  |
| 265516    | 284395.1  | 219656.2  | 232831.4  | 261921.6  | 293391.2  | 206973.2  | 149115.1  | 158503.3  | 187017.4  |
| 269531.5  | 276457.8  | 211201.2  | 241274.6  | 258867    | 294203.3  | 213457.2  | 146733.5  | 174003.8  | 186380.5  |



|           |           |           |           |           |           |           |           |           |           |
|-----------|-----------|-----------|-----------|-----------|-----------|-----------|-----------|-----------|-----------|
| LP419.316 | LP419.352 | LP419.391 | LP420.180 | LP420.192 | LP420.192 | LP420.193 | LP420.192 | LP420.192 | LP420.259 |
| 293026.4  | 17528.88  | 15038.27  | 192670.7  | 60386.22  | 40622.35  | 47166.23  | 85706.61  | 49859.85  | 139371    |
| 303606.5  | 21144.53  | 15311.26  | 178828.9  | 63081.17  | 37729.59  | 47746.08  | 87294.9   | 47012.41  | 565251.1  |
| 296117.5  | 16349.12  | 15349.05  | 235237.2  | 60973.07  | 45173.57  | 45258.98  | 85652.55  | 43921.3   | 555056.9  |
| 312866.1  | 17002.62  | 15783.41  | 218171.7  | 59025.32  | 40341.7   | 47954.75  | 99392.87  | 47015.13  | 151483.8  |
| 327127.3  | 22036.81  | 13143.37  | 178939.9  | 55939.5   | 41541.86  | 49796.15  | 93923.16  | 42433.97  | 549670.9  |

|           |           |           |           |           |           |           |           |           |           |
|-----------|-----------|-----------|-----------|-----------|-----------|-----------|-----------|-----------|-----------|
| LP420.259 | LP420.259 | LP420.259 | LP420.258 | LP420.259 | LP420.259 | LP420.259 | LP420.259 | LP420.259 | LP420.259 |
| 155874.9  | 398211.7  | 128222.1  | 173468.5  | 189068.6  | 112185.7  | 171508.6  | 129489.1  | 188487.6  | 217920.1  |
| 140537.7  | 411831.3  | 95401.57  | 148807.4  | 188286    | 121030.2  | 187958.9  | 125100.1  | 191223.7  | 235115.5  |
| 174832.9  | 413469.5  | 124616.8  | 156911    | 195713.3  | 122402.8  | 187676.6  | 136007.8  | 196858.8  | 221115.4  |
| 175067.6  | 254712.9  | 128025.5  | 165981.1  | 197823.4  | 110226.9  | 193877.7  | 93826.65  | 194313    | 176288.4  |
| 83717.43  | 192903.3  | 120859.7  | 164966.2  | 126121.4  | 121722.3  | 182903.5  | 151929.9  | 182611.8  | 128661    |

|           |           |           |           |           |           |           |           |           |           |
|-----------|-----------|-----------|-----------|-----------|-----------|-----------|-----------|-----------|-----------|
| LP420.259 |
| 192707.4  | 120331.8  | 149317.3  | 135209.5  | 137648.4  | 89902.47  | 183083    | 206954.1  | 111546.3  | 91196.53  |
| 127237.3  | 122119.3  | 156847.3  | 116924.1  | 275530.4  | 95409.35  | 190862.2  | 217533.4  | 114795    | 82073.27  |
| 197619.6  | 131399.4  | 156942.4  | 142513.2  | 272483.1  | 101821.7  | 168898.6  | 216471.5  | 112653.6  | 75305.1   |
| 190881.2  | 123322.3  | 154326.6  | 127762.4  | 275688.5  | 91642.83  | 191210.9  | 222882.6  | 109305    | 88248.33  |
| 178754.4  | 129339.6  | 143508.8  | 135016.3  | 263864.6  | 88951.43  | 186495.6  | 155864.6  | 115202    | 74361.12  |

|           |           |           |           |           |           |           |           |           |           |
|-----------|-----------|-----------|-----------|-----------|-----------|-----------|-----------|-----------|-----------|
| LP420.258 | LP420.259 |
| 137534.4  | 231806.6  | 249228.7  | 106589.6  | 141477.4  | 199768.3  | 106645.4  | 163193.9  | 157473.4  | 169847.8  |
| 139822.7  | 233506.1  | 262381.6  | 111986.7  | 143795.9  | 194747.1  | 89726.19  | 172080.9  | 142300.3  | 155837.7  |
| 127133.7  | 218060.7  | 256294.8  | 120342.6  | 142595.9  | 185115.6  | 95324.11  | 168464.7  | 160549.5  | 175172.3  |
| 130802    | 232079.9  | 264338.3  | 88096.25  | 127579.1  | 167572.9  | 84416.24  | 175831.5  | 159489.9  | 166213.8  |
| 127068.1  | 228716.7  | 266738.4  | 119040.7  | 131328.1  | 180892.5  | 91715.61  | 161573    | 157662.6  | 164709.6  |

|           |           |           |           |           |           |           |           |           |           |
|-----------|-----------|-----------|-----------|-----------|-----------|-----------|-----------|-----------|-----------|
| LP420.259 | LP420.258 | LP420.259 | LP420.259 |
| 129496.5  | 140695.7  | 119769.6  | 171518.1  | 143956.2  | 192080.7  | 115999.3  | 121149    | 182932.5  | 107671.7  |
| 137203.7  | 159269.8  | 155606.6  | 203074.6  | 152027.3  | 198138.5  | 113256.7  | 140917.9  | 174807.9  | 125366.7  |
| 125009.8  | 139740.1  | 152975.6  | 198566.8  | 152941.7  | 219733.6  | 110842.7  | 141151.7  | 179048.4  | 126141.8  |
| 87863.44  | 135352.3  | 137864.3  | 202949.3  | 102093.4  | 215498    | 111887.9  | 144112.1  | 175534.4  | 126988.4  |
| 126720.7  | 135668.6  | 146613.2  | 190104    | 141053.8  | 125547.7  | 113952.4  | 136374.4  | 122370.2  | 127205.2  |

|           |           |           |           |           |           |           |           |           |           |
|-----------|-----------|-----------|-----------|-----------|-----------|-----------|-----------|-----------|-----------|
| LP420.259 | LP420.295 | LP420.295 | LP420.295 | LP420.296 | LP420.295 | LP420.296 | LP420.296 | LP420.296 | LP420.295 |
| 133172.1  | 346587.4  | 175677.8  | 155510.9  | 289085.1  | 205168.3  | 237220.6  | 170178.8  | 204962.4  | 157123.7  |
| 132159.6  | 167514.2  | 162372.5  | 186273.2  | 263953.8  | 203437.6  | 191826.7  | 166919.9  | 211503.5  | 118057.7  |
| 137805.3  | 210054.6  | 165460.2  | 210137    | 235872.2  | 156099.5  | 194261.8  | 170036.3  | 260870.5  | 159395.6  |
| 133388.1  | 132844.9  | 169303    | 198843.6  | 302276.8  | 196798.6  | 173912.3  | 162410.7  | 213367.5  | 140475.7  |
| 139304.6  | 237403.7  | 148468.7  | 171671.3  | 319332    | 203261    | 193200.3  | 168443.1  | 203202.5  | 125913    |

|           |           |           |           |           |           |           |           |           |           |
|-----------|-----------|-----------|-----------|-----------|-----------|-----------|-----------|-----------|-----------|
| LP420.295 | LP420.296 | LP420.296 | LP420.296 | LP420.296 | LP420.295 | LP420.295 | LP420.295 | LP420.296 | LP420.296 |
| 233624.8  | 230233.8  | 207607.4  | 147424.9  | 269772.8  | 279684.9  | 128069.7  | 161990.2  | 199915.8  | 131793.5  |
| 189249.2  | 202316.7  | 232317.1  | 155259.4  | 249338.2  | 252068.7  | 116643.4  | 148790.9  | 174360.6  | 143843.4  |
| 217730.6  | 244011.7  | 203973    | 271651    | 258903.5  | 245265.9  | 122090    | 160479.8  | 162103.7  | 145116.5  |
| 197501.7  | 285923.8  | 231274.3  | 150041.6  | 333272    | 284253.9  | 126483.2  | 161503.7  | 163690.4  | 146399.6  |
| 117951.6  | 231168.8  | 217372.3  | 158327.4  | 265144.7  | 285352.4  | 115952.6  | 158510.4  | 196878.6  | 119836.1  |

|           |           |           |           |           |           |           |           |           |           |
|-----------|-----------|-----------|-----------|-----------|-----------|-----------|-----------|-----------|-----------|
| LP420.296 | LP420.296 | LP420.296 | LP420.296 | LP420.295 | LP420.296 | LP420.296 | LP420.296 | LP420.296 | LP420.296 |
| 145545.2  | 174778.7  | 168009.9  | 183275.6  | 103767.1  | 273492.2  | 161285.3  | 630054.3  | 160800.3  | 136347.4  |
| 160188.4  | 247755.2  | 168092.8  | 171563.7  | 121893.6  | 278144.2  | 156687.3  | 656515.9  | 156452.8  | 136216    |
| 166554.1  | 236150.1  | 151525.7  | 167331    | 124821.1  | 126088.4  | 155354.8  | 613741.6  | 148438.9  | 153491.2  |
| 187737.2  | 237866.8  | 167150.3  | 164127    | 126988.8  | 291688.6  | 161384.2  | 585933    | 152131.7  | 145490.5  |
| 139641.7  | 250232    | 234303.5  | 162171.1  | 120575.5  | 293767.2  | 174408.3  | 585369.4  | 160709.5  | 133598.5  |



|           |          |          |          |          |          |          |          |          |          |          |
|-----------|----------|----------|----------|----------|----------|----------|----------|----------|----------|----------|
| LP420.295 | 140563.1 | 144942.9 | 241563.1 | 178536.3 | 201356   | 165620.1 | 183357.1 | 160751.5 | 142772   | 119911.2 |
| LP420.296 | 123751   | 140524.9 | 189116.1 | 162237   | 164970.7 | 165901   | 192288.7 | 198343.2 | 180094.2 | 127628.3 |
| LP420.296 | 111979.6 | 111052.3 | 168272.9 | 154895.9 | 181025.5 | 172576.1 | 191299.9 | 166450.4 | 182047.5 | 114194.7 |
| LP420.295 | 117882.4 | 145806.2 | 185471.8 | 159921.2 | 160901.7 | 163312.4 | 284941.4 | 166815   | 181898.9 | 153787.7 |
| LP420.296 | 118975.3 | 141738.2 | 143774.6 | 153832   | 161021.6 | 174483.6 | 203259   | 152481.3 | 179381.3 | 114034.4 |

|           |           |           |           |           |           |           |           |           |           |
|-----------|-----------|-----------|-----------|-----------|-----------|-----------|-----------|-----------|-----------|
| LP420.296 | LP420.295 | LP420.296 | LP420.296 | LP420.295 | LP420.296 | LP420.295 | LP420.296 | LP420.296 | LP420.296 |
| 138298.6  | 153259.6  | 123483.2  | 197652.7  | 100915.2  | 134956.9  | 114394    | 124368.3  | 167359    | 176564.3  |
| 146672.8  | 159450.7  | 97576.34  | 179081.3  | 110308.8  | 145832.2  | 126148.2  | 125639    | 150612.2  | 144583.3  |
| 121530    | 197415.3  | 132927.9  | 142348.2  | 97102.55  | 155260.1  | 113621.2  | 171858.8  | 152437.6  | 141732.5  |
| 136103.3  | 149447.7  | 123122.9  | 193027.4  | 108122.7  | 125976.5  | 124827.6  | 107679.9  | 128917.7  | 163994.1  |
| 126105.7  | 161233.5  | 131387.2  | 195624.5  | 111268.3  | 135958.8  | 114907.3  | 112272.9  | 138196.5  | 143987    |

|           |           |           |           |           |           |           |           |           |           |
|-----------|-----------|-----------|-----------|-----------|-----------|-----------|-----------|-----------|-----------|
| LP420.296 | LP420.296 | LP420.295 | LP420.296 | LP420.296 | LP420.296 | LP420.295 | LP420.296 | LP420.296 | LP420.296 |
| 134921    | 206948    | 152343.5  | 134656.5  | 171775.8  | 184291.5  | 159404.3  | 212107.5  | 187458.2  | 116514.8  |
| 140041.2  | 142862.2  | 157013.7  | 142920.9  | 174125    | 138809.1  | 126807.3  | 209417.9  | 182009.9  | 102348    |
| 142452.8  | 130638.5  | 147315.2  | 192381.5  | 172414    | 133514.5  | 116591.2  | 207775.7  | 199401.5  | 105414.7  |
| 147699.6  | 129275.7  | 143310.5  | 142852.9  | 180778.2  | 125230.2  | 126409.5  | 210997.5  | 172887.7  | 97720.68  |
| 136334.5  | 126677.2  | 168076.9  | 146031.2  | 160963.5  | 130230    | 116535.2  | 222532.3  | 181251.4  | 99427.3   |

|           |           |           |           |           |           |           |           |           |           |
|-----------|-----------|-----------|-----------|-----------|-----------|-----------|-----------|-----------|-----------|
| LP420.296 | LP420.295 | LP420.296 | LP420.319 | LP420.319 | LP420.332 | LP420.332 | LP420.332 | LP421.141 | LP421.180 |
| 173381.9  | 102972.4  | 357342.9  | 1023714   | 532510.3  | 148342.8  | 204297.8  | 74658.36  | 19902.02  | 25430.57  |
| 156603.2  | 89498.74  | 365919.5  | 696079.2  | 622235.6  | 152177.3  | 204994.5  | 77934.28  | 15954.54  | 25635.62  |
| 146976.2  | 99176.42  | 377141.9  | 842637.2  | 636758.2  | 140000.4  | 195718.5  | 88641.02  | 16693.58  | 37977.09  |
| 146810.3  | 88094.88  | 378932.1  | 815207    | 596656.7  | 148855.6  | 193048.7  | 80416.16  | 13221.29  | 39093.1   |
| 149815.2  | 89437.29  | 365844.2  | 743598.2  | 418162.3  | 142196.5  | 193345.1  | 75740.32  | 13494.67  | 34067.87  |

|           |           |           |           |           |           |           |           |           |           |
|-----------|-----------|-----------|-----------|-----------|-----------|-----------|-----------|-----------|-----------|
| LP421.251 | LP421.253 | LP421.298 | LP421.298 | LP421.298 | LP421.299 | LP421.320 | LP421.328 | LP421.333 | LP421.416 |
| 598808.5  | 141072.3  | 64243.02  | 52543.97  | 74903.74  | 46108.68  | 389582.4  | 48132.47  | 16631.32  | 27938.56  |
| 495277.1  | 146354.3  | 52857.19  | 46575.63  | 54534.18  | 63916.84  | 362412.2  | 57167.09  | 18932.93  | 30016.29  |
| 632207.8  | 182799.9  | 57661.66  | 49580.55  | 57579.98  | 56571.61  | 475253.7  | 54526.87  | 18765.71  | 29530.31  |
| 630473.3  | 201236.2  | 56801.31  | 42975.59  | 58113.84  | 57285.39  | 473732.5  | 50856.64  | 18146.07  | 26491.41  |
| 433967    | 223140.2  | 62990.21  | 46340.45  | 59533.07  | 50725.78  | 357910.6  | 53668.58  | 19505.44  | 23506.4   |

|           |           |           |           |           |           |           |           |           |           |
|-----------|-----------|-----------|-----------|-----------|-----------|-----------|-----------|-----------|-----------|
| LP422.181 | LP422.183 | LP422.237 | LP422.238 | LP422.238 | LP422.238 | LP422.239 | LP422.238 | LP422.238 | LP422.238 |
| 41749.55  | 60638.99  | 34707.48  | 78957.01  | 72966.32  | 63456.64  | 53507.41  | 37701.14  | 42196.54  | 53487.57  |
| 36788.32  | 63314     | 34387.33  | 66674.52  | 78811.89  | 65275.09  | 56571.58  | 35218.92  | 51059.52  | 49259.38  |
| 38715.77  | 55079.38  | 30820.96  | 73806.49  | 77890.63  | 55667.32  | 57644.97  | 36971.79  | 43875.7   | 45723.93  |
| 40353.38  | 52764.86  | 33786.87  | 71198.97  | 76570.63  | 62975.8   | 64490.4   | 34322.24  | 45821.63  | 54014.39  |
| 49505.1   | 53984.48  | 33429.85  | 71017.94  | 83661.83  | 61742.29  | 53785.57  | 38378.73  | 49004.1   | 51759.53  |

|           |           |           |           |           |           |           |           |           |           |           |
|-----------|-----------|-----------|-----------|-----------|-----------|-----------|-----------|-----------|-----------|-----------|
| LP422.238 | LP422.238 | LP422.238 | LP422.239 | LP422.239 | LP422.238 | LP422.239 | LP422.239 | LP422.239 | LP422.239 | LP422.254 |
| 41981.44  | 59937.25  | 87898.76  | 33581.95  | 50046.22  | 56334.35  | 56859.29  | 43363.25  | 62739.97  | 190395.1  |           |
| 38361.01  | 59630.79  | 80451.15  | 34903.39  | 52629.38  | 54882.05  | 62170.62  | 42796.16  | 57019.86  | 190197    |           |
| 45032.33  | 58096.48  | 83362.87  | 39486.59  | 49945.04  | 45267.28  | 67637.2   | 44015.61  | 57045.74  | 143067.1  |           |
| 42220.51  | 61427.28  | 69668.83  | 34455.9   | 48109.57  | 60313.55  | 67128.53  | 48202.28  | 69158.32  | 137039.6  |           |
| 48693.63  | 55131.99  | 84091.24  | 34911.18  | 47235.98  | 50338.12  | 65800.25  | 40054.86  | 61273.66  | 167120.8  |           |

|           |           |           |           |           |           |           |           |           |           |
|-----------|-----------|-----------|-----------|-----------|-----------|-----------|-----------|-----------|-----------|
| LP422.257 | LP422.274 | LP422.275 | LP422.275 | LP422.275 | LP422.274 | LP422.275 | LP422.274 | LP422.275 | LP422.275 |
| 162539.9  | 101994.7  | 127360.1  | 133592.4  | 126949.2  | 102479.2  | 106388.9  | 90220.01  | 173077.8  | 125326.4  |
| 158039.7  | 146416    | 170021.4  | 115137.2  | 117026.1  | 124546.7  | 134404.8  | 116555    | 107688.1  | 89854.39  |
| 151310.6  | 226150.5  | 167791.6  | 251948.6  | 125292.5  | 120014.7  | 111699.2  | 106593    | 117837.9  | 123102.5  |
| 155551.1  | 118121.8  | 116364.5  | 133452.5  | 99607.99  | 135938.9  | 112199.3  | 122095.8  | 107538.7  | 126823.9  |
| 136196.6  | 161539.7  | 107307.1  | 167470.4  | 116083.6  | 110944.9  | 120185.9  | 100497.7  | 105666.3  | 121221.1  |



|           |           |           |           |           |           |           |           |           |           |
|-----------|-----------|-----------|-----------|-----------|-----------|-----------|-----------|-----------|-----------|
| LP422.275 |
| 85621.49  | 76217.9   | 145654.5  | 99004.3   | 99807.25  | 107184.8  | 110902.6  | 117869    | 147648.8  | 122627    |
| 160998.3  | 104219.4  | 146372.2  | 136468.2  | 87559.75  | 117205    | 114563.6  | 91906.92  | 152571    | 150448.8  |
| 87811.41  | 87537.83  | 131263.8  | 98972.74  | 80826.95  | 114849.8  | 115803.3  | 113771.9  | 155570.1  | 124529.1  |
| 108853.5  | 78495.74  | 168121.5  | 126959.8  | 77737.52  | 103616.1  | 113921.6  | 121557.5  | 124125    | 125801.8  |
| 87617.78  | 102647.3  | 141371.5  | 100622.4  | 81116.32  | 96050.95  | 106577.4  | 119152.8  | 151092.2  | 113290    |

|           |           |           |           |           |           |           |           |           |           |
|-----------|-----------|-----------|-----------|-----------|-----------|-----------|-----------|-----------|-----------|
| LP422.275 |
| 84188.45  | 96389.08  | 150562.7  | 111977.6  | 83376.98  | 118326.5  | 74106.5   | 101264.7  | 108076.8  | 100434.5  |
| 96499.61  | 94263.29  | 139565.5  | 119180.1  | 106675.7  | 106349.6  | 101705.8  | 99355.43  | 116352.3  | 101345.6  |
| 90136.94  | 91606.84  | 141180.1  | 114642.7  | 114205.5  | 104108.7  | 103197.8  | 107537.7  | 108945.4  | 96635.86  |
| 82996.77  | 153752.4  | 139783.5  | 114135.6  | 79520.44  | 166124.6  | 60897.17  | 90994.99  | 106990.7  | 95441.66  |
| 89978.5   | 89395.7   | 156721.5  | 111744.8  | 82531.26  | 102159    | 65877.65  | 98325.37  | 99432.39  | 101078.7  |

|           |           |           |           |           |           |           |           |           |           |
|-----------|-----------|-----------|-----------|-----------|-----------|-----------|-----------|-----------|-----------|
| LP422.275 | LP422.275 | LP422.275 | LP422.275 | LP422.275 | LP422.275 | LP422.274 | LP422.275 | LP422.275 | LP422.275 |
| 86505.14  | 104365    | 143271.5  | 93056.46  | 101612.8  | 105954    | 79227.57  | 62408.35  | 77340.51  | 73172.45  |
| 85750.02  | 112695.7  | 153011.5  | 94631.5   | 96317.98  | 100669.7  | 86402.55  | 66840.16  | 83953.85  | 72916.42  |
| 83388.31  | 114800.5  | 148294.2  | 88975.99  | 104802    | 100892.5  | 81295.53  | 61879.51  | 81265.75  | 71273.85  |
| 99697.92  | 105201.9  | 141556.2  | 93670.71  | 106066.5  | 91968.1   | 74731.69  | 57591.83  | 78773.2   | 72680.02  |
| 86643.71  | 110187.5  | 142157.1  | 88114.38  | 105619.9  | 107670.4  | 99145.95  | 57301.28  | 88518.32  | 73055.97  |

|           |           |           |           |           |           |           |           |           |           |
|-----------|-----------|-----------|-----------|-----------|-----------|-----------|-----------|-----------|-----------|
| LP422.275 |
| 105490.7  | 80189.52  | 78401.65  | 95785.75  | 99973.48  | 79704.26  | 99257.8   | 113688.2  | 80923.6   | 91431.57  |
| 97714.15  | 78700.05  | 86123.72  | 89426.21  | 97793.68  | 91490.72  | 98064.44  | 108528.6  | 91115.12  | 98404.66  |
| 91430.01  | 86483.14  | 79400.41  | 92789.74  | 98502.46  | 88289.85  | 100269.8  | 105598.4  | 86654.32  | 89968.49  |
| 92741.23  | 70355.34  | 80701.06  | 82775.62  | 100542.5  | 80518.77  | 91475.81  | 111092.7  | 85446.42  | 85205.61  |
| 110280.6  | 88974.38  | 68293.55  | 99882.79  | 93561.93  | 77499.16  | 105551.2  | 120777.8  | 87026.71  | 89307.59  |

|           |           |           |           |           |           |           |           |           |           |
|-----------|-----------|-----------|-----------|-----------|-----------|-----------|-----------|-----------|-----------|
| LP422.275 | LP422.275 | LP422.274 | LP422.274 | LP422.275 | LP422.275 | LP422.275 | LP422.275 | LP422.275 | LP422.293 |
| 147130.6  | 133203    | 89240.99  | 101400.5  | 68263.68  | 85290.69  | 153287.5  | 85758.12  | 94739.04  | 36737.19  |
| 146320.2  | 126593.8  | 85930.87  | 98386.93  | 69951.08  | 79090.24  | 152454.6  | 89466.1   | 95631.19  | 102141.2  |
| 149942.4  | 128663.8  | 86599.68  | 94523.47  | 68407.76  | 95210.09  | 144343.2  | 76426.81  | 85041.37  | 118316.1  |
| 134741    | 138802.6  | 96539.28  | 93777.88  | 62465.97  | 83217.89  | 150375.8  | 92778.18  | 88220.96  | 122605.5  |
| 138310.5  | 121875.4  | 87516.83  | 88937.31  | 61929.09  | 87803.52  | 143911.6  | 75896.76  | 94831.79  | 105614.7  |

|           |           |           |           |           |           |           |           |           |           |
|-----------|-----------|-----------|-----------|-----------|-----------|-----------|-----------|-----------|-----------|
| LP422.311 | LP422.312 | LP422.311 | LP422.311 | LP422.312 | LP422.312 | LP422.311 | LP422.312 | LP422.312 | LP422.311 |
| 132871.6  | 192712.3  | 88466.12  | 60820.57  | 101608.7  | 109571.2  | 116665.4  | 97358.99  | 128179.8  | 66612.82  |
| 124544.2  | 177950.7  | 88358.31  | 59142.72  | 102302    | 120999.4  | 102393.6  | 99252.41  | 128135.8  | 65880.51  |
| 135382.7  | 181373.8  | 103289.7  | 58024.62  | 98763.34  | 115559.4  | 108868.4  | 91688.32  | 129015.1  | 61448.76  |
| 130580.6  | 192443.4  | 92454.95  | 56400.56  | 96874.94  | 114232.6  | 106927.3  | 97087.32  | 133454.7  | 61482.55  |
| 131736.5  | 190984.4  | 100106.4  | 57781.69  | 99054.84  | 116636.1  | 104848.8  | 100234.9  | 132941    | 61425.63  |

|           |           |           |           |           |           |           |           |           |           |           |
|-----------|-----------|-----------|-----------|-----------|-----------|-----------|-----------|-----------|-----------|-----------|
| LP422.311 | LP422.312 |
| 71869.24  | 73505.59  | 90823     | 123326.3  | 98559.85  | 97840.89  | 113285    | 85375.32  | 78448.36  | 149503.7  |           |
| 76901.24  | 78120.88  | 91467.15  | 120238.7  | 94114.93  | 98343.21  | 117126.9  | 79073.78  | 69280.22  | 144270.2  |           |
| 83745.56  | 81173.7   | 88282.9   | 118745.1  | 101919.2  | 85431.54  | 114883.6  | 84923.25  | 78973.23  | 150117.1  |           |
| 77668.87  | 80203.67  | 86002.37  | 126124.6  | 90935.73  | 93911.64  | 108695.1  | 88773.46  | 80371.54  | 155284.2  |           |
| 82009.5   | 78529.49  | 98608.3   | 124780.5  | 98428.56  | 104323.1  | 102217.8  | 79974.47  | 81484.59  | 141448.1  |           |

|           |           |           |           |           |           |           |           |           |           |
|-----------|-----------|-----------|-----------|-----------|-----------|-----------|-----------|-----------|-----------|
| LP422.312 | LP422.311 | LP422.312 | LP422.312 | LP422.311 | LP422.311 | LP422.311 | LP422.312 | LP422.311 | LP422.311 |
| 84618.23  | 71013.7   | 76242.66  | 67029.51  | 123495.5  | 104712.3  | 112928    | 88153.94  | 94831.82  | 86852.53  |
| 81631.11  | 73739.82  | 75076.88  | 70068.71  | 132319.7  | 116290.5  | 102413.6  | 86811.55  | 98873.06  | 83504.32  |
| 84301.46  | 64907.87  | 80824.19  | 68511.42  | 132305.8  | 116951.8  | 110841.5  | 96219.15  | 102828.7  | 88117.07  |
| 87202.98  | 67751.08  | 78747.07  | 66155.73  | 128357.5  | 113075.1  | 107891.4  | 90566.08  | 92091.88  | 85645.5   |
| 81273.12  | 64690.97  | 81807.57  | 70580.3   | 132426.4  | 110935    | 104877.7  | 90251.36  | 97612.03  | 89809.51  |



|           |           |           |           |           |           |           |           |           |           |           |
|-----------|-----------|-----------|-----------|-----------|-----------|-----------|-----------|-----------|-----------|-----------|
| LP422.311 | LP422.311 | LP422.312 | LP422.311 | LP422.312 | LP422.311 | LP422.311 | LP422.311 | LP422.311 | LP422.311 | LP422.311 |
| 117054.8  | 162915.7  | 95808.04  | 78227.23  | 96629.02  | 100881.8  | 55626.57  | 83994.48  | 83347.55  | 164984.2  |           |
| 121722.4  | 148674.9  | 102773.7  | 82271.16  | 101548.9  | 90739.42  | 61732.49  | 85132.42  | 87276.61  | 152366.5  |           |
| 119544.4  | 169410.8  | 103365.5  | 80434.23  | 101586.1  | 93615.69  | 55721.05  | 83658.42  | 99313.01  | 160287.2  |           |
| 123015    | 150727    | 105138.2  | 81117.6   | 97859.72  | 85807.09  | 48905.9   | 93153.58  | 97703.49  | 149512.3  |           |
| 122596.9  | 167761.9  | 91014.45  | 79827.08  | 103670.8  | 103228.8  | 50011.76  | 87460.35  | 100786.8  | 158283.2  |           |

|           |           |           |           |           |           |           |           |           |           |
|-----------|-----------|-----------|-----------|-----------|-----------|-----------|-----------|-----------|-----------|
| LP422.312 | LP422.311 | LP422.310 | LP422.311 | LP422.311 | LP422.312 | LP422.311 | LP422.311 | LP422.312 | LP422.311 |
| 75571.5   | 109452.9  | 85601.57  | 139634.1  | 79835.25  | 64632.03  | 67362.99  | 62048.21  | 82766.84  | 52178.57  |
| 69644.65  | 106015.5  | 82902.15  | 143484.1  | 77488.59  | 67129.15  | 67771.1   | 62316.73  | 86432.58  | 53895.03  |
| 67613.63  | 104500.1  | 89026.19  | 146902.9  | 83059.38  | 73066.57  | 71424.1   | 59865.76  | 82708.98  | 53523.73  |
| 80016.37  | 110380.8  | 92764.21  | 144939.9  | 81834.29  | 64081.38  | 70369.22  | 62561.65  | 86781.46  | 53538.33  |
| 73880.86  | 112612.8  | 95910.35  | 147988    | 83321.22  | 66095.86  | 70364.14  | 69143.91  | 82611.19  | 63775.96  |

|           |           |           |           |           |           |           |           |           |           |
|-----------|-----------|-----------|-----------|-----------|-----------|-----------|-----------|-----------|-----------|
| LP422.312 | LP422.311 | LP422.311 | LP422.312 | LP422.311 | LP422.311 | LP422.312 | LP422.311 | LP422.311 | LP422.311 |
| 69138.72  | 77585.25  | 81143.53  | 92171.12  | 99918.41  | 67980.62  | 85541.43  | 87936.63  | 85245.43  | 65078.27  |
| 68270.32  | 81591.7   | 74702.77  | 89334.06  | 94694.73  | 68691.31  | 78463.41  | 91174.27  | 87100.86  | 61471.54  |
| 66252.69  | 73520.65  | 84332.44  | 95879.81  | 102976.3  | 69983.55  | 91325.46  | 86957.9   | 90464.78  | 68424.13  |
| 68715.21  | 83547.4   | 75308.8   | 96909.98  | 105671.7  | 69917.06  | 87333.16  | 88937.29  | 96380.59  | 66950.93  |
| 63958.91  | 78110.11  | 73769.35  | 89876.53  | 94216.06  | 70238.86  | 85668.51  | 80051.45  | 78640.25  | 58521.53  |

|           |           |           |           |           |           |           |           |           |           |
|-----------|-----------|-----------|-----------|-----------|-----------|-----------|-----------|-----------|-----------|
| LP422.312 | LP422.311 | LP422.311 | LP422.312 | LP422.312 | LP422.312 | LP422.311 | LP422.311 | LP422.310 | LP422.312 |
| 90073.68  | 95094.51  | 96164.51  | 105583.7  | 100643.7  | 83409.13  | 59175.39  | 56585.97  | 67921.22  | 83452.26  |
| 92374.49  | 98423.69  | 97141.79  | 98486.34  | 99473.11  | 69275.71  | 62916.07  | 56142.04  | 73982.4   | 90358.53  |
| 97158.55  | 97831.43  | 98316.91  | 107219.4  | 113456.1  | 74296.93  | 66375.18  | 55118.29  | 64778.67  | 86041.14  |
| 89887.73  | 92619.89  | 100246.9  | 106667.6  | 107923.1  | 81352.59  | 56256.5   | 61373.02  | 55798.31  | 81297.98  |
| 96898.35  | 91661.14  | 99832.96  | 104722.2  | 106231.7  | 69059.59  | 56177.22  | 54994.45  | 70306.73  | 93082.53  |

|           |           |           |           |           |           |           |           |           |           |
|-----------|-----------|-----------|-----------|-----------|-----------|-----------|-----------|-----------|-----------|
| LP422.312 | LP422.311 | LP422.311 | LP422.311 | LP422.311 | LP422.312 | LP422.325 | LP422.421 | LP423.178 | LP423.237 |
| 149263.8  | 90516.39  | 89259.65  | 66332.63  | 48844.06  | 109575.6  | 86882.05  | 24671.72  | 35442.86  | 45647.74  |
| 153185.6  | 82285.52  | 89830.49  | 60425.87  | 60179.86  | 113217.4  | 138723.2  | 24242.66  | 33086.37  | 47314.73  |
| 150778.5  | 97615.98  | 89580.68  | 66112.37  | 54357.21  | 109810.1  | 140491.3  | 19390.72  | 34396.75  | 45062.79  |
| 159372.4  | 95026.02  | 90430.45  | 74931.53  | 50952.86  | 107698.5  | 143093.3  | 23265.99  | 29760.08  | 45116.91  |
| 147934.4  | 90112.26  | 90881.8   | 62900.54  | 50590.71  | 109338.7  | 58343.1   | 25166.58  | 29081.48  | 47833.99  |

|           |           |           |           |           |           |           |           |           |           |
|-----------|-----------|-----------|-----------|-----------|-----------|-----------|-----------|-----------|-----------|
| LP423.251 | LP423.308 | LP423.307 | LP423.310 | LP423.311 | LP423.329 | LP423.383 | LP423.383 | LP423.383 | LP423.383 |
| 126190.3  | 73593.86  | 50337.01  | 50786.28  | 42401.57  | 33028.77  | 39869.66  | 35138.61  | 40244.35  | 49343.16  |
| 123294.2  | 62746.36  | 51463.5   | 55162.95  | 43939.35  | 42128.09  | 37774.37  | 33908.2   | 45426.21  | 57465.61  |
| 111760.9  | 74381.47  | 57185.29  | 49805.81  | 42814.93  | 33286.32  | 43176.34  | 31338.69  | 42060.64  | 52341.62  |
| 103102.1  | 62181.69  | 56775.9   | 51890.11  | 41350.31  | 31091.61  | 35777.93  | 32957.71  | 44804.34  | 50440.83  |
| 90050.16  | 51643.26  | 54349.81  | 56953.55  | 45049.35  | 29525.27  | 39504.08  | 35139.98  | 41822.47  | 49918.1   |

|            |            |            |            |            |            |            |            |            |            |
|------------|------------|------------|------------|------------|------------|------------|------------|------------|------------|
| LP423.419' | LP423.42_' | LP423.42_' | LP423.419' | LP423.419' | LP423.430' | LP424.151' | LP424.217' | LP424.217' | LP424.217' |
| 37352.14   | 39981.63   | 43841.68   | 28649.6    | 79557.77   | 27054.15   | 23360.55   | 27992.44   | 28877.13   | 36143.18   |
| 31564.46   | 39940.51   | 46651.14   | 33193.44   | 70439.96   | 30682.56   | 20598.13   | 30909.29   | 21147.5    | 38840.91   |
| 36111.49   | 40956.06   | 46808.82   | 29644.69   | 82307.69   | 28251.32   | 23978.02   | 24949.14   | 29798.01   | 38858.88   |
| 29803.05   | 39129.74   | 43415.77   | 28760.23   | 70757.72   | 24105.09   | 26212.7    | 32331.78   | 25135.8    | 37327.17   |
| 34450.18   | 42836.42   | 45053.81   | 28942.85   | 72765.23   | 27162.22   | 23118.59   | 37338.12   | 32785.97   | 44687.09   |

|           |           |           |           |           |           |           |           |           |           |
|-----------|-----------|-----------|-----------|-----------|-----------|-----------|-----------|-----------|-----------|
| LP424.217 | LP424.217 | LP424.217 | LP424.217 | LP424.218 | LP424.217 | LP424.217 | LP424.218 | LP424.217 | LP424.218 |
| 35613.14  | 34666.47  | 41763.41  | 51428.78  | 57671.89  | 45574.86  | 27987.32  | 25789.47  | 24034.83  | 47167.81  |
| 37084.99  | 35624.51  | 45597.07  | 49563.29  | 48116.19  | 40552.95  | 26827.48  | 23782.15  | 27333.3   | 45809.31  |
| 38661.43  | 39510.96  | 48273.78  | 55159.13  | 52503.73  | 42977.17  | 24888.66  | 24563.52  | 24532.15  | 45736.55  |
| 37341.84  | 35377.59  | 39848.77  | 48243.95  | 55567.91  | 36981.27  | 25702.54  | 24902.66  | 23596.55  | 51218.22  |
| 39888.17  | 50629.71  | 40513.51  | 54367.83  | 48289.22  | 41533.48  | 33170.02  | 29906.3   | 24424.69  | 45071.89  |



|           |           |           |           |           |           |           |           |           |           |
|-----------|-----------|-----------|-----------|-----------|-----------|-----------|-----------|-----------|-----------|
| LP424.217 | LP424.217 | LP424.218 | LP424.254 | LP424.254 | LP424.265 | LP424.290 | LP424.290 | LP424.290 | LP424.290 |
| 33165.83  | 42021.7   | 29645.55  | 215316.3  | 89467.04  | 134193.8  | 281077.5  | 274125.8  | 146944.4  | 164860.4  |
| 34021.68  | 43684.01  | 30501.2   | 217051.2  | 85596.75  | 140694.4  | 152097.3  | 146465.4  | 176982.5  | 198911.7  |
| 38092.66  | 44868.05  | 32276.14  | 227878.9  | 91886.81  | 120259.7  | 200858    | 291218.5  | 136286.8  | 241556.3  |
| 36039.59  | 41106.37  | 27430.8   | 234957    | 85609.71  | 122551.7  | 220319.7  | 159754.1  | 146739.3  | 187641.3  |
| 38561.55  | 41213.49  | 26704.96  | 222120.8  | 95178.15  | 125063.5  | 162361    | 246340.3  | 135144.3  | 175032.8  |

|           |           |           |           |           |           |           |           |           |           |
|-----------|-----------|-----------|-----------|-----------|-----------|-----------|-----------|-----------|-----------|
| LP424.290 |
| 164113.7  | 286739.2  | 173788.3  | 241529.8  | 328038.3  | 245901.4  | 153980.8  | 108210.6  | 259492.4  | 159682.6  |
| 258608.9  | 289292.8  | 158757.5  | 277902.6  | 333880.9  | 235802    | 168296.5  | 107378.5  | 257875.6  | 163460.7  |
| 171709.2  | 299691.7  | 143413.1  | 230717.5  | 482185.9  | 234048.5  | 169599.3  | 113117.5  | 228967.6  | 150974.4  |
| 127223.3  | 190549.7  | 190770.7  | 333021    | 365767.1  | 219074.8  | 162965.5  | 115184.4  | 198473.6  | 140465.7  |
| 156091.9  | 217712.7  | 141596.8  | 329604.6  | 252828.5  | 210593.1  | 141435.5  | 104133.7  | 217665.2  | 168285.4  |

|            |            |            |            |            |            |            |            |            |            |
|------------|------------|------------|------------|------------|------------|------------|------------|------------|------------|
| LP424.290' | LP424.291' | LP424.291' | LP424.290' |
| 139204.7   | 178504.1   | 200074.5   | 167828.5   | 158237.7   | 147611.3   | 212764.5   | 160173.3   | 92379.97   | 108118     |
| 140666.8   | 195907.9   | 184488     | 167016.9   | 238126.1   | 143278.4   | 144427.4   | 117354.7   | 90191.05   | 98680.96   |
| 144187.2   | 193569.9   | 177748.6   | 157239.9   | 165978.8   | 237758.3   | 162776.3   | 113612.5   | 88508.02   | 87822.18   |
| 137068.7   | 247722.5   | 199115.5   | 137247.8   | 125834.8   | 157064.4   | 147477.8   | 146735     | 86624.4    | 95861.63   |
| 155507.9   | 198517.9   | 198591.2   | 151792.6   | 153887.1   | 132087.9   | 170106.4   | 113520.7   | 86918.61   | 84485.13   |

|           |           |           |           |           |           |           |           |           |           |
|-----------|-----------|-----------|-----------|-----------|-----------|-----------|-----------|-----------|-----------|
| LP424.290 | LP424.290 | LP424.290 | LP424.290 | LP424.291 | LP424.290 | LP424.290 | LP424.290 | LP424.291 | LP424.290 |
| 104289.2  | 185811.6  | 88138.53  | 124227.6  | 156795.2  | 172891.6  | 157661.3  | 88899.68  | 134866.1  | 143657.2  |
| 105497    | 150355.1  | 95801.84  | 175369.4  | 160700.2  | 160744.2  | 167281.9  | 93031.03  | 139312.4  | 154137.2  |
| 109560.9  | 156495.2  | 94907.46  | 116415.8  | 159432.4  | 162424.4  | 155232.3  | 100481.3  | 129859.2  | 158689.3  |
| 125313.4  | 151825.6  | 100515.2  | 134224.6  | 157071.6  | 214474.4  | 161457.4  | 106853.1  | 141104.2  | 171820.8  |
| 106330.2  | 151044.3  | 88431.89  | 110005.4  | 154589.3  | 156888.9  | 149474.2  | 89186.76  | 122969.5  | 146741.7  |

|           |           |           |           |           |           |           |           |           |           |
|-----------|-----------|-----------|-----------|-----------|-----------|-----------|-----------|-----------|-----------|
| LP424.291 | LP424.291 | LP424.291 | LP424.291 | LP424.291 | LP424.291 | LP424.290 | LP424.290 | LP424.290 | LP424.290 |
| 132080.2  | 173086.3  | 174745.5  | 152948.1  | 138534.4  | 141492.9  | 98872.29  | 176607.9  | 145288.5  | 97276.32  |
| 127536.6  | 167838.1  | 205087.4  | 194362.4  | 135879    | 134776    | 108901    | 166835.3  | 141256.9  | 105344.6  |
| 132438.3  | 178651    | 174784.3  | 142489.8  | 112415.7  | 133700.4  | 192557.1  | 150531.6  | 143658.8  | 105702.4  |
| 180680.7  | 214439.1  | 199814.9  | 143055.7  | 181990.6  | 148642.7  | 100449    | 175310.8  | 122271.6  | 108369.7  |
| 134347    | 163771.4  | 184127.9  | 190617.3  | 126335.8  | 126730.8  | 92971.5   | 163624.6  | 135364.7  | 98603.12  |

|           |           |           |           |           |           |           |           |           |           |
|-----------|-----------|-----------|-----------|-----------|-----------|-----------|-----------|-----------|-----------|
| LP424.291 | LP424.290 | LP424.290 | LP424.290 | LP424.290 | LP424.290 | LP424.290 | LP424.291 | LP424.291 | LP424.290 |
| 139174.5  | 198770.7  | 128631    | 169754.4  | 119674.5  | 178215.9  | 99485.42  | 123620.7  | 157293.3  | 95040.22  |
| 143897.4  | 220282.7  | 158627.5  | 156880.1  | 111124.1  | 119638.5  | 114671.2  | 129351.6  | 163137.5  | 101129.2  |
| 157566.3  | 194860.1  | 118357    | 148542.2  | 124592.5  | 131245.8  | 104245.9  | 140252.2  | 159264.3  | 91338.79  |
| 137540.9  | 191249.4  | 116808.9  | 148102.7  | 121172.8  | 146366.6  | 114826.2  | 118269.6  | 129336.4  | 96019.03  |
| 135736.2  | 196452.6  | 116126.2  | 140071.6  | 120370.7  | 109168.1  | 103900.2  | 122926.9  | 148218.7  | 89865.42  |

|           |           |           |           |           |           |          |           |           |           |
|-----------|-----------|-----------|-----------|-----------|-----------|----------|-----------|-----------|-----------|
| LP424.290 | LP424.291 | LP424.290 | LP424.306 | LP424.306 | LP424.311 | LP424.31 | LP424.326 | LP424.326 | LP424.327 |
| 120103.9  | 107437.8  | 133811.9  | 128417.8  | 94801.73  | 88857.7   | 162181.6 | 246398.6  | 214833.6  | 242006.6  |
| 114653.3  | 115365.9  | 135301.7  | 123004.3  | 88517.64  | 95264.21  | 164817.6 | 249183.3  | 218060.1  | 245867.4  |
| 114168.7  | 105864.4  | 134300.3  | 122197.6  | 84065.98  | 94005.84  | 156782.2 | 251471.6  | 235020.9  | 251586.4  |
| 102257.2  | 99575.32  | 134408.9  | 112104.8  | 84959.27  | 100856.1  | 142773.4 | 261574    | 207342.7  | 252167.6  |
| 114990.4  | 101590.7  | 144893    | 114278.2  | 78633.66  | 88246.5   | 147053.9 | 270704.8  | 235313.5  | 48725.05  |

|           |           |           |           |           |           |           |           |           |           |
|-----------|-----------|-----------|-----------|-----------|-----------|-----------|-----------|-----------|-----------|
| LP424.363 | LP424.363 | LP424.363 | LP424.451 | LP425.214 | LP425.214 | LP425.214 | LP425.214 | LP425.214 | LP425.214 |
| 75792.22  | 49172.87  | 41288.27  | 9090.441  | 71180.77  | 79246.92  | 73617.4   | 94993.95  | 92462.64  | 60526.31  |
| 75405.63  | 45631.36  | 50049.29  | 8444.667  | 42760.97  | 62393.39  | 83364.38  | 114023.5  | 107735    | 79455.15  |
| 75985.93  | 39455.64  | 55369.76  | 11141.06  | 50744.65  | 94593.17  | 94294.29  | 82149.15  | 77218.74  | 100572.9  |
| 74669.36  | 35784.54  | 50508.93  | 17727.87  | 56801.47  | 92538.17  | 85528.41  | 97125.57  | 103505.1  | 57051.04  |
| 69722.29  | 34284.3   | 53357.14  | 13346.46  | 51634.34  | 79321.82  | 79068.67  | 81255.15  | 69471.32  | 83920.44  |



|           |           |           |           |           |           |           |           |           |           |
|-----------|-----------|-----------|-----------|-----------|-----------|-----------|-----------|-----------|-----------|
| LP425.214 |
| 74994.65  | 84699.47  | 81996.71  | 70514.41  | 42968.84  | 101584.8  | 83111.57  | 102851.3  | 51421.67  | 57993.11  |
| 85120.22  | 127444.1  | 87658.04  | 125006.7  | 36198.75  | 65735.98  | 53306.61  | 94164.59  | 53728.7   | 66654.68  |
| 105319.5  | 133386.5  | 68383.24  | 58458.17  | 30328.56  | 93246.63  | 49905.95  | 69382.47  | 66569.37  | 60774.27  |
| 110979.6  | 88865.07  | 69613.85  | 68404.63  | 35982.53  | 73405.05  | 81669.64  | 72403.24  | 56760.7   | 85452.13  |
| 82282.12  | 81324.34  | 57534.22  | 81218.21  | 44356.41  | 92428.3   | 59715.05  | 116013    | 53971.13  | 63365.14  |

|           |           |           |           |           |           |           |           |           |           |
|-----------|-----------|-----------|-----------|-----------|-----------|-----------|-----------|-----------|-----------|
| LP425.214 |
| 129535.3  | 100170.7  | 96753.03  | 89760.65  | 79826.97  | 111831.5  | 68240.55  | 89201.34  | 108592.3  | 81049.34  |
| 95801.21  | 108135.9  | 84823.48  | 73902.07  | 107968.6  | 98276.71  | 78294.19  | 93652.66  | 96207.6   | 70581.71  |
| 59708.85  | 63225.01  | 109410.3  | 118140.4  | 75754.93  | 117642.4  | 63378.53  | 93365.86  | 70489.44  | 62176.76  |
| 95039.11  | 73999.54  | 103564.7  | 74516.09  | 90566.78  | 88826.57  | 64956.01  | 84688.16  | 127848.5  | 83450.93  |
| 78645.22  | 108086.4  | 113471.4  | 71432.71  | 101310.7  | 85832.74  | 71326.15  | 124869.5  | 73484.44  | 66266.12  |

|            |            |            |            |            |            |            |            |            |            |
|------------|------------|------------|------------|------------|------------|------------|------------|------------|------------|
| LP425.214! |
| 39456.62   | 79934.71   | 89635.39   | 62714.73   | 72659.24   | 77219.34   | 51527.32   | 61412.97   | 66882.73   | 92539.06   |
| 35241.38   | 88066.14   | 141334.9   | 78608.78   | 72799.06   | 65892.25   | 45080.32   | 78746.66   | 75347.24   | 69500.9    |
| 42310.28   | 56354.57   | 120050.2   | 112575.7   | 95815.2    | 62936.88   | 46238.44   | 73951.7    | 80875.44   | 96020.44   |
| 43717.1    | 64237.27   | 93124.86   | 95815.06   | 95822.71   | 69823.45   | 49785.02   | 50848.82   | 85234.17   | 82011.97   |
| 29719.46   | 75569.64   | 63616.56   | 100192.7   | 67420      | 93855.14   | 43810.49   | 57554.4    | 62256.16   | 79964.6    |

|           |           |           |           |           |           |           |           |           |           |
|-----------|-----------|-----------|-----------|-----------|-----------|-----------|-----------|-----------|-----------|
| LP425.214 |
| 52075.53  | 88653.49  | 90227.15  | 99369.43  | 53216.16  | 109582.1  | 125334.8  | 84215.41  | 84492.28  | 70428.02  |
| 50305.42  | 84528.32  | 71127.16  | 77163.82  | 60672.84  | 74756.13  | 115159.9  | 78015.14  | 78181.84  | 103033.6  |
| 40503.55  | 94767.84  | 70590.12  | 109938.8  | 39885.63  | 57820.08  | 87716.19  | 93360.75  | 130871.5  | 74939.51  |
| 49849.72  | 81837.56  | 57729.95  | 77302.1   | 52540.87  | 86513.19  | 88400.75  | 114812.5  | 57504.57  | 80820.37  |
| 44932.66  | 116143.1  | 85804.33  | 57773.22  | 40018.61  | 66879.68  | 95093.19  | 95004.67  | 55535.02  | 69501.6   |

|           |           |           |           |           |           |           |           |           |           |
|-----------|-----------|-----------|-----------|-----------|-----------|-----------|-----------|-----------|-----------|
| LP425.214 |
| 60420.88  | 48797.51  | 62106.39  | 101690.7  | 52193.55  | 72907.58  | 67938.35  | 38493.68  | 64978.52  | 78194.87  |
| 46241.03  | 44744.34  | 63741.71  | 91096.92  | 45690.63  | 63283.77  | 79904.61  | 43679.31  | 90608.3   | 114221.4  |
| 45020.45  | 52753.77  | 78311.6   | 86795.83  | 49165.26  | 81697.5   | 73265.59  | 40895.45  | 55996.67  | 67593.89  |
| 42928.82  | 38293.03  | 106142.2  | 80689.76  | 70776.83  | 64754.59  | 68994.84  | 32610.54  | 63838.86  | 73919.08  |
| 41842.51  | 38887.08  | 60069.64  | 74291.89  | 69373.85  | 83864.64  | 87981.03  | 40280.14  | 73375.67  | 96513.5   |

|           |           |           |           |           |           |           |           |           |           |
|-----------|-----------|-----------|-----------|-----------|-----------|-----------|-----------|-----------|-----------|
| LP425.214 |
| 63657.31  | 87099.36  | 29631.74  | 84354.74  | 116844.3  | 90370.29  | 67405.91  | 56014.31  | 78168.47  | 68509.46  |
| 80886.07  | 85557.55  | 52649.03  | 71671.03  | 100648.5  | 80356.9   | 61742.95  | 49306.42  | 83077.39  | 75800.53  |
| 106480.7  | 87820.72  | 43616.09  | 103143.9  | 84622.33  | 100294.1  | 66624.79  | 55969.27  | 86736.23  | 89897.48  |
| 85293.92  | 87049.46  | 26280.11  | 103240.6  | 117719.8  | 119810.4  | 74254.33  | 61868.09  | 96680.22  | 93583.32  |
| 84411.02  | 93723.87  | 45252.82  | 63450.85  | 106787.5  | 92049.02  | 51018.11  | 55977.87  | 77566.12  | 66948.52  |

|           |           |           |           |           |           |           |           |           |           |
|-----------|-----------|-----------|-----------|-----------|-----------|-----------|-----------|-----------|-----------|
| LP425.214 |
| 68238.84  | 42555.23  | 74819.75  | 64754.81  | 68621.94  | 48145.7   | 101740.3  | 77075.39  | 90833.99  | 44794.36  |
| 84465.6   | 72876.22  | 101363.4  | 76297.64  | 80032.59  | 52817.16  | 108354.4  | 70526.63  | 85818.47  | 43855.31  |
| 126280    | 42359.11  | 73762.55  | 74396.74  | 81506.9   | 43612.78  | 70829.06  | 94770.28  | 88192.91  | 45582.33  |
| 96520.28  | 45592.19  | 95090.07  | 65376.11  | 67425.83  | 49740.85  | 106893.6  | 78785.08  | 87351.85  | 34154.39  |
| 71146.01  | 40370.03  | 96831.01  | 43804.09  | 58486.12  | 43831.52  | 98614.71  | 75715.42  | 82510.46  | 37767.5   |

|           |           |           |           |           |           |           |           |           |           |
|-----------|-----------|-----------|-----------|-----------|-----------|-----------|-----------|-----------|-----------|
| LP425.214 |
| 87524.81  | 81990.01  | 63190.22  | 113359    | 65923.16  | 64738.43  | 85643.87  | 81530.26  | 87065.91  | 104136.9  |
| 80090.03  | 57297.53  | 74612.95  | 79109.52  | 74123.53  | 66735.19  | 120100.3  | 67605.98  | 98265.62  | 129331.6  |
| 81915.83  | 99088.67  | 72384.37  | 68660.51  | 73318.74  | 67007.99  | 55734.74  | 71749.11  | 89620.48  | 100436.1  |
| 75290.31  | 67449.85  | 76527.27  | 91224.15  | 72727.16  | 74475.45  | 117633.7  | 71441.95  | 72874.83  | 100112.6  |
| 65480.94  | 86518.45  | 82740.94  | 80452.7   | 99873.58  | 70965.42  | 95027.18  | 82333.99  | 68431.34  | 105903.3  |



|           |           |           |           |           |           |           |           |           |           |
|-----------|-----------|-----------|-----------|-----------|-----------|-----------|-----------|-----------|-----------|
| LP425.220 | LP425.292 | LP425.293 | LP425.293 | LP425.293 | LP425.293 | LP425.309 | LP425.363 | LP425.365 | LP425.446 |
| 44771.99  | 58025.61  | 53367.89  | 46357.57  | 66854.59  | 69493.62  | 20372.65  | 196478.5  | 21515.26  | 320468.7  |
| 49069.7   | 56761.86  | 46877.14  | 40340.46  | 78873.71  | 56183.09  | 20533.76  | 155063    | 14583.59  | 281911.6  |
| 48817.77  | 57520.78  | 54886.17  | 45594.78  | 65584.14  | 68109.95  | 19063.81  | 318532.2  | 17965.43  | 253823.5  |
| 43751.86  | 55962.62  | 52466.88  | 52557.95  | 69688.38  | 68793.97  | 20171.37  | 147169.4  | 14951.95  | 232959.4  |
| 48501.34  | 55031.3   | 49673.3   | 48042.66  | 61104.16  | 69713.12  | 19565.89  | 154972.1  | 13339.8   | 240435.6  |

|           |           |           |           |           |           |           |           |           |           |
|-----------|-----------|-----------|-----------|-----------|-----------|-----------|-----------|-----------|-----------|
| LP426.233 | LP426.233 | LP426.233 | LP426.234 | LP426.233 | LP426.233 | LP426.234 | LP426.232 | LP426.233 | LP426.234 |
| 98219.61  | 71534.85  | 111000.1  | 134827.5  | 71000.09  | 67255.55  | 122111.1  | 105051.4  | 61134.97  | 130033.8  |
| 77521.9   | 66961.57  | 100375.2  | 117989    | 77421.67  | 78997.63  | 111297.8  | 100984.8  | 81937.65  | 142696    |
| 100696.8  | 77054.75  | 115670.6  | 147742.4  | 75609.17  | 80514.64  | 113086    | 107017.3  | 74262.45  | 146731.7  |
| 85907.5   | 78763.58  | 99782.78  | 151214.1  | 76957.11  | 69888.43  | 164736.4  | 107472.7  | 72691.46  | 144160.2  |
| 79520.86  | 77728.41  | 132898.6  | 157559.5  | 75095.93  | 71937.14  | 158340.4  | 95243.87  | 66421.3   | 148843.2  |

|           |           |           |           |           |           |           |           |           |           |
|-----------|-----------|-----------|-----------|-----------|-----------|-----------|-----------|-----------|-----------|
| LP426.233 | LP426.234 | LP426.234 | LP426.233 |
| 93694.47  | 89673.66  | 74005.42  | 94399.15  | 79587.75  | 108939.1  | 86230.12  | 94582.09  | 91923.12  | 64028.56  |
| 80557.59  | 91086.11  | 67933.74  | 95411.66  | 78311.19  | 106276    | 102378.4  | 98341.18  | 92950.3   | 72385.91  |
| 83471.01  | 98590.54  | 65870.8   | 93604.18  | 79566.85  | 110286    | 90199.34  | 98421.46  | 87807.63  | 67834.36  |
| 89092.83  | 104294.6  | 77963.13  | 93858.64  | 77691     | 119083.2  | 80571.25  | 108401.9  | 102333.9  | 70652.63  |
| 80873.93  | 79185.7   | 79699.43  | 70351.26  | 98276.6   | 109409.8  | 89376.15  | 98626.85  | 89037.41  | 79642.36  |

|           |           |           |           |           |           |           |           |           |           |
|-----------|-----------|-----------|-----------|-----------|-----------|-----------|-----------|-----------|-----------|
| LP426.233 | LP426.233 | LP426.233 | LP426.233 | LP426.234 | LP426.233 | LP426.233 | LP426.233 | LP426.234 | LP426.234 |
| 82479.63  | 92394.48  | 79464.84  | 79585.82  | 79747.1   | 43808.14  | 104271.5  | 92371.7   | 114538.4  | 58952.18  |
| 82415.93  | 97569.23  | 75511.96  | 79499.14  | 84884.84  | 40364.9   | 100742.1  | 92908.28  | 114951.1  | 60724.75  |
| 82548.26  | 93300.02  | 72066.58  | 76934.79  | 78886.77  | 49055.88  | 104961.2  | 96973.71  | 113081.3  | 59716.36  |
| 82649.45  | 96225.58  | 77645.22  | 74741.32  | 79329.39  | 46817.46  | 96251.65  | 98130.6   | 116590.7  | 63603.29  |
| 96745.54  | 98409.09  | 79989.72  | 74652.84  | 80367.55  | 56523.97  | 99226.71  | 93442.09  | 106789.5  | 57633.51  |

|           |           |           |           |           |           |           |           |           |           |
|-----------|-----------|-----------|-----------|-----------|-----------|-----------|-----------|-----------|-----------|
| LP426.233 | LP426.270 | LP426.270 | LP426.270 |
| 45743.72  | 71098.32  | 74182.94  | 56689.77  | 83912.93  | 80518.62  | 98317.13  | 70772.07  | 104460.4  | 70476.19  |
| 41319.56  | 68508.24  | 68340.49  | 64077.31  | 88031.53  | 85690.95  | 89964.21  | 68392.2   | 107745    | 71625.53  |
| 44696.67  | 73885.89  | 74109.35  | 68568.47  | 88649.58  | 88463.03  | 96760.69  | 69598.32  | 102054.5  | 71850.7   |
| 43639.96  | 64085.79  | 77184.45  | 64710.74  | 78741.64  | 82543.24  | 83908.91  | 69037.21  | 95581.63  | 75470.58  |
| 44777.37  | 75067.69  | 74220.65  | 60765.79  | 89565.33  | 85453.64  | 93695.7   | 60074.39  | 93074.67  | 71108.49  |

|           |           |           |           |           |           |           |           |           |           |
|-----------|-----------|-----------|-----------|-----------|-----------|-----------|-----------|-----------|-----------|
| LP426.270 | LP426.271 | LP426.269 | LP426.321 | LP426.367 | LP426.366 | LP426.430 | LP426.432 | LP426.430 | LP426.430 |
| 55541.1   | 32767.96  | 95453.57  | 46577.39  | 66361.24  | 51662.78  | 141587.3  | 222907.2  | 22633.31  | 27141.38  |
| 58855.39  | 33324.16  | 102285.9  | 47948.85  | 64435.45  | 54017.09  | 130225.5  | 255219.4  | 21874.66  | 28878.97  |
| 60194.46  | 31814.24  | 97354.27  | 48353.64  | 62880.66  | 56979.25  | 147679.5  | 262601.2  | 23789.78  | 31923.44  |
| 59723.69  | 35249.42  | 91792.72  | 46234.36  | 58797.41  | 41738.73  | 129854.6  | 238214.9  | 21605.94  | 27117.53  |
| 54125.83  | 32840.09  | 88344.58  | 19515.34  | 61406.52  | 52293.65  | 144167.4  | 229823.2  | 22407.11  | 29030.93  |

|           |           |           |           |           |           |           |           |           |           |           |
|-----------|-----------|-----------|-----------|-----------|-----------|-----------|-----------|-----------|-----------|-----------|
| LP426.449 | LP427.157 | LP427.194 |
| 196395.4  | 24696.19  | 76572.92  | 82654.48  | 94068.85  | 104548.6  | 56045.53  | 77230.23  | 81275.43  | 111117.7  |           |
| 198213.6  | 64878.86  | 75520.03  | 71804.29  | 93561.75  | 99133.73  | 58777.75  | 75562.17  | 76536.6   | 102707.4  |           |
| 173888.5  | 65206.14  | 78927.28  | 79950.26  | 85446.66  | 105999.9  | 55110.05  | 90820.34  | 81750.87  | 102952.1  |           |
| 166824.8  | 58241.46  | 72317.26  | 76313.99  | 89337.51  | 105873    | 70181.11  | 70963.47  | 72412.25  | 104323.4  |           |
| 171193.8  | 62546.71  | 76858.69  | 82349.79  | 94238.08  | 96638.29  | 61869.51  | 83400.31  | 77649.47  | 105482.1  |           |

|           |           |           |           |           |           |           |           |           |           |
|-----------|-----------|-----------|-----------|-----------|-----------|-----------|-----------|-----------|-----------|
| LP427.194 | LP427.194 | LP427.194 | LP427.194 | LP427.194 | LP427.194 | LP427.193 | LP427.194 | LP427.194 | LP427.193 |
| 78549.33  | 68356.83  | 70098.34  | 72003.89  | 64060.9   | 80846.44  | 79869.77  | 88652.94  | 67135.75  | 89045.43  |
| 77845.26  | 53327.14  | 68467.57  | 75440.6   | 63490.72  | 79407.45  | 75116.34  | 84431     | 54410.08  | 100300    |
| 80386.5   | 52960.4   | 63764.57  | 78965.97  | 59966.97  | 70735.3   | 76569.89  | 75206.85  | 55241.76  | 96909.67  |
| 81456.14  | 54787.26  | 63127.1   | 76684.12  | 57819.85  | 78174.34  | 76678.63  | 82804.44  | 53363.11  | 89967.14  |
| 76444.18  | 54637.64  | 63487.99  | 75231.03  | 58580.36  | 69158.02  | 78502.16  | 94420.47  | 65368.36  | 87395.63  |



|           |           |           |           |           |           |           |           |           |           |
|-----------|-----------|-----------|-----------|-----------|-----------|-----------|-----------|-----------|-----------|
| LP427.193 | LP427.194 | LP427.194 | LP427.194 | LP427.194 | LP427.193 | LP427.194 | LP427.194 | LP427.193 | LP427.194 |
| 60481.69  | 130287.1  | 87351.85  | 86111.58  | 53923.78  | 95920.31  | 64784.86  | 84617.51  | 59809.48  | 149672.4  |
| 63613.91  | 129379.6  | 93607.78  | 85096.36  | 57292.29  | 99252.27  | 72358.81  | 81556.77  | 59350.81  | 137382.1  |
| 57714.83  | 123833.9  | 87763.29  | 82487     | 54098.06  | 105587.1  | 67822.76  | 79809.05  | 59741.07  | 146546.9  |
| 63272.64  | 127667.7  | 97224.72  | 86962.38  | 56869.07  | 83087.18  | 66159.41  | 86898.35  | 51689.65  | 142711.4  |
| 58919.63  | 127903.4  | 91486.32  | 89441.97  | 50560.5   | 99177.07  | 59654.74  | 90118.8   | 56831.39  | 141012.4  |

|           |           |           |           |           |           |           |           |           |           |
|-----------|-----------|-----------|-----------|-----------|-----------|-----------|-----------|-----------|-----------|
| LP427.193 | LP427.194 | LP427.194 | LP427.194 | LP427.193 | LP427.194 | LP427.194 | LP427.194 | LP427.194 | LP427.230 |
| 103967.8  | 68095.11  | 60989.95  | 93412.29  | 82160.77  | 104662.8  | 92975.07  | 162953.2  | 80610.09  | 86590     |
| 105904.8  | 73835.26  | 64318.75  | 103032.7  | 75082.41  | 109971.2  | 86830.3   | 150307.9  | 74212.21  | 94672.76  |
| 105996.2  | 71195.51  | 73074.88  | 99138.34  | 78580.46  | 107072.2  | 88966.04  | 160382.1  | 78021.2   | 82829.65  |
| 102937.9  | 71874.65  | 71944.21  | 93700.46  | 85058.21  | 100500.7  | 85496.2   | 154882.5  | 73978.22  | 85636.79  |
| 94074.33  | 72365.37  | 74266.84  | 92467.68  | 78058.1   | 99042.9   | 82624.68  | 146637    | 71110.79  | 115304.5  |

|           |           |           |           |           |           |           |           |           |           |
|-----------|-----------|-----------|-----------|-----------|-----------|-----------|-----------|-----------|-----------|
| LP427.230 | LP427.230 | LP427.230 | LP427.231 | LP427.230 | LP427.230 | LP427.230 | LP427.230 | LP427.230 | LP427.230 |
| 69193.45  | 94382.11  | 67506.19  | 35167.18  | 69734.82  | 85960.27  | 104479.2  | 117951.4  | 76446.36  | 62085.66  |
| 104456.6  | 79645.99  | 80251.99  | 39101.94  | 66924.69  | 74654.71  | 65655.94  | 69520.98  | 88239.2   | 73136.1   |
| 85931.82  | 101666.2  | 57882.51  | 38233.11  | 81193.8   | 79085.72  | 122863.7  | 106838.3  | 69415.09  | 55668.26  |
| 63735.82  | 61980.89  | 99282.88  | 19995.85  | 58396.52  | 117701.2  | 65199.37  | 93200.29  | 64770.39  | 83464.06  |
| 75164.9   | 79440.65  | 88473.38  | 32210.56  | 72278.52  | 95078.35  | 101070.5  | 76917.72  | 74948.17  | 74693.64  |

|           |           |           |           |           |           |           |           |           |           |
|-----------|-----------|-----------|-----------|-----------|-----------|-----------|-----------|-----------|-----------|
| LP427.230 |
| 78673.54  | 101297    | 59626.95  | 87350.58  | 81760.83  | 89199.6   | 59973.97  | 57389.2   | 104150    | 95853.51  |
| 53117.69  | 88884.43  | 56047.41  | 90254.56  | 63944.54  | 77746.44  | 76399.58  | 63600.14  | 116353.3  | 79884.45  |
| 78927.74  | 94755.79  | 53016.55  | 95330.84  | 76922.41  | 76157.93  | 103836.6  | 93153.19  | 96364.95  | 101243.6  |
| 69547.52  | 105493.9  | 89047.72  | 70976.69  | 83708.61  | 76204.07  | 57259.34  | 82279.64  | 82631.12  | 89472.14  |
| 82802     | 81180.4   | 68752.32  | 106647.8  | 108140.3  | 72258.42  | 73660.92  | 81376.33  | 79534.8   | 78647.93  |

|           |           |           |           |           |           |           |           |           |           |
|-----------|-----------|-----------|-----------|-----------|-----------|-----------|-----------|-----------|-----------|
| LP427.230 | LP427.230 | LP427.230 | LP427.230 | LP427.231 | LP427.230 | LP427.230 | LP427.230 | LP427.230 | LP427.230 |
| 73369.85  | 48342.55  | 98322.84  | 84780.65  | 31348.08  | 112883.4  | 60830.4   | 70212.15  | 73317.73  | 111915.5  |
| 72327.07  | 79838.05  | 80597.22  | 85826.18  | 25863.52  | 79373.8   | 69759.04  | 78483.53  | 67292.8   | 74766.55  |
| 64455.92  | 93856.55  | 73227.56  | 87437.79  | 36953.54  | 62999.35  | 54563.42  | 64051.42  | 91051.22  | 88613.91  |
| 68837.2   | 77501.06  | 93059.62  | 116602.2  | 28635.64  | 68464.25  | 63769.67  | 64980.18  | 90561.96  | 76951.78  |
| 89617.46  | 71536.24  | 65932.46  | 77357.34  | 38111.54  | 79134.24  | 82490.66  | 97260.69  | 52730.12  | 81048.38  |

|           |           |           |           |           |           |           |           |           |           |
|-----------|-----------|-----------|-----------|-----------|-----------|-----------|-----------|-----------|-----------|
| LP427.230 |
| 65176.64  | 119150.4  | 104105.3  | 78728.42  | 77443.93  | 118875.4  | 60161.34  | 83487.17  | 74873.95  | 101415.1  |
| 100366.2  | 122604.2  | 76911.04  | 89140.34  | 58536.85  | 72558.41  | 59026.54  | 110932.1  | 100284.2  | 90492.3   |
| 95990.26  | 102293.3  | 94118.38  | 71245.31  | 56689.63  | 143273.1  | 69457.47  | 83046.69  | 97586.11  | 92760.4   |
| 73790.94  | 103023.7  | 103001.1  | 69758.4   | 57679.38  | 84409.61  | 54553.7   | 107942.6  | 60425.71  | 70319.37  |
| 92950.47  | 87173.52  | 70463.68  | 80976.26  | 70322.14  | 86083.03  | 61324.13  | 91356.83  | 96209.47  | 104745.9  |

|           |           |           |           |           |           |           |           |           |           |
|-----------|-----------|-----------|-----------|-----------|-----------|-----------|-----------|-----------|-----------|
| LP427.230 | LP427.230 | LP427.231 | LP427.230 |
| 94433.68  | 118267.1  | 30658.5   | 96487.9   | 95045.04  | 131286.7  | 86575.03  | 55181.57  | 63620.48  | 51529.98  |
| 95571.8   | 94857.61  | 43705.26  | 91486.07  | 125692.7  | 105292    | 93416.22  | 27588.55  | 78544.78  | 90575.31  |
| 83019.59  | 96781.56  | 37229.94  | 80097.17  | 113906    | 91419.81  | 74627.43  | 43348.68  | 49546.96  | 65688.24  |
| 81525.4   | 88160.55  | 41409.77  | 52470.8   | 82756.36  | 120423.3  | 83251.44  | 30246.87  | 79707.96  | 69286.77  |
| 77968.93  | 70954.54  | 29548.03  | 93382.46  | 136616.4  | 83152.77  | 87661.44  | 28657.65  | 47212.98  | 69996.77  |

|           |           |           |           |           |           |           |           |           |           |
|-----------|-----------|-----------|-----------|-----------|-----------|-----------|-----------|-----------|-----------|
| LP427.230 |
| 87590.78  | 114334.1  | 38683.5   | 85589.77  | 22703.89  | 44055.54  | 70210.07  | 88118.64  | 58609.46  | 62252.25  |
| 100222.5  | 76346.22  | 37279.05  | 64192.48  | 29345.7   | 33627.31  | 125887.5  | 97187.68  | 54541.28  | 55322.74  |
| 76186.97  | 100853.4  | 32340.57  | 73396.81  | 33031.41  | 45845.3   | 82143.67  | 90499.9   | 57903.71  | 73145.75  |
| 112608    | 91758.22  | 36582.52  | 59154.27  | 28734.9   | 51364.38  | 72434.87  | 141576.5  | 49678.75  | 72600.32  |
| 110342    | 91680.75  | 56697.71  | 72615.17  | 34791.39  | 49626.95  | 103727.8  | 92632.55  | 51334.87  | 70204.96  |



|           |           |           |           |           |           |           |           |           |           |
|-----------|-----------|-----------|-----------|-----------|-----------|-----------|-----------|-----------|-----------|
| LP427.231 | LP427.230 |
| 45731.74  | 46850.9   | 67082.22  | 100649.7  | 67553.73  | 70033.37  | 86786.18  | 63508.56  | 65365.1   | 69442.61  |
| 25432.13  | 51357.63  | 52282.71  | 84611.34  | 74836.89  | 65144.63  | 71886.48  | 50729.66  | 74793.33  | 52890.36  |
| 22809.78  | 51872.42  | 80275.59  | 63045.69  | 59374.18  | 80751.42  | 105771.4  | 60055.9   | 80158.77  | 60938.39  |
| 28779.63  | 42461.08  | 79332.56  | 65785.48  | 74353.85  | 70780.15  | 83945.48  | 65463.61  | 76527.13  | 56337.51  |
| 37565.79  | 41561.9   | 64047.02  | 94271.49  | 57350.87  | 71198.85  | 81288.31  | 64181.36  | 68052.15  | 52741.68  |

|           |           |           |           |           |           |           |           |           |           |
|-----------|-----------|-----------|-----------|-----------|-----------|-----------|-----------|-----------|-----------|
| LP427.230 |
| 61597.34  | 39158.56  | 28024.22  | 128837.1  | 46220.21  | 50525.85  | 48702.19  | 84519.65  | 79558.82  | 28698.3   |
| 49468.84  | 37729.92  | 40994.35  | 116958.2  | 40645.48  | 58690.15  | 33797.06  | 73196.97  | 96364.15  | 34820.31  |
| 71029.14  | 40844.6   | 40551.4   | 108953.4  | 43829.85  | 59525.62  | 43150.34  | 81304.99  | 61285.84  | 37755.6   |
| 88314.63  | 42035.03  | 26480.62  | 85854.51  | 51466.13  | 60207.9   | 36660.04  | 68608.51  | 97528.78  | 29838.92  |
| 56894.61  | 41426.72  | 40763.9   | 88592.36  | 41768.45  | 64093.58  | 31513.11  | 92893.2   | 88555.91  | 36669.79  |

|           |           |           |           |           |           |           |           |           |           |
|-----------|-----------|-----------|-----------|-----------|-----------|-----------|-----------|-----------|-----------|
| LP427.230 | LP427.251 | LP427.251 | LP427.251 | LP427.251 | LP427.252 | LP427.290 | LP427.303 | LP427.363 | LP427.377 |
| 45931.71  | 59575.42  | 404066    | 133580.2  | 26154.83  | 21172.06  | 42164.83  | 19881.47  | 28331.27  | 58889.34  |
| 43188.59  | 61273.55  | 464756.9  | 144842    | 26368.35  | 20528.55  | 50554.48  | 25256.82  | 23795.23  | 61934.17  |
| 37292.42  | 74548.16  | 704744    | 204498.6  | 28733.8   | 21544.54  | 52067.09  | 22095.32  | 19982.75  | 59624.71  |
| 38201     | 81887.46  | 858432.5  | 229232.8  | 28514.16  | 17537.67  | 57573.68  | 19988.03  | 21116.46  | 64096.15  |
| 39099.15  | 87921.87  | 935978.9  | 257405.3  | 27782.2   | 20990.37  | 59220.96  | 21339.95  | 26022.24  | 59621.79  |

|           |           |           |           |           |           |           |           |           |           |
|-----------|-----------|-----------|-----------|-----------|-----------|-----------|-----------|-----------|-----------|
| LP427.378 | LP427.378 | LP427.378 | LP427.389 | LP427.389 | LP427.434 | LP427.435 | LP427.462 | LP427.462 | LP427.462 |
| 1117279   | 267992.4  | 136128.8  | 113843.5  | 40664     | 65639.69  | 50794.51  | 7610.739  | 7303.946  | 6298.534  |
| 1709733   | 252264.4  | 133315.9  | 105789.3  | 38235.64  | 750132.8  | 54607.37  | 8498.571  | 8144.579  | 6984.488  |
| 1010135   | 230337.1  | 127549.5  | 105216.4  | 49905.51  | 108425.6  | 48539.47  | 13296.69  | 12730.31  | 10874.16  |
| 1379473   | 287027.8  | 136000.6  | 96404.74  | 33127.92  | 128186    | 38798.54  | 16155.28  | 15447.3   | 13127.12  |
| 1408528   | 241964.5  | 138225.2  | 101539.9  | 32532.12  | 817920.4  | 46628.21  | 17919.81  | 17141.03  | 14588.83  |

|           |           |           |           |           |           |           |           |           |           |
|-----------|-----------|-----------|-----------|-----------|-----------|-----------|-----------|-----------|-----------|
| LP428.248 | LP428.249 | LP428.249 | LP428.249 | LP428.249 | LP428.249 | LP428.248 | LP428.249 | LP428.249 | LP428.249 |
| 103059.2  | 80702.26  | 124948.3  | 91611.71  | 46513.68  | 112067.3  | 69749.86  | 63200.86  | 65628.58  | 41217.47  |
| 94598.01  | 86247.94  | 119715.7  | 130934    | 59066.85  | 119489.1  | 61935.71  | 74442.14  | 78461.27  | 38363.62  |
| 90878.09  | 104201.9  | 123843.6  | 87574.16  | 54745.13  | 105522.4  | 65879.72  | 71193.08  | 84662.07  | 39402.54  |
| 72776.45  | 78694.87  | 108470.6  | 69443.18  | 45450.58  | 76240.13  | 67323.74  | 60961.03  | 55020.16  | 36664.72  |
| 86549.69  | 83637.02  | 108858.8  | 83243.24  | 47164.67  | 106844.5  | 60457.37  | 68799.23  | 68171.18  | 40681.31  |

|           |           |           |           |           |           |           |           |           |           |
|-----------|-----------|-----------|-----------|-----------|-----------|-----------|-----------|-----------|-----------|
| LP428.250 | LP428.249 | LP428.249 | LP428.248 | LP428.249 | LP428.249 | LP428.249 | LP428.292 | LP428.301 | LP428.311 |
| 36956.41  | 102651    | 64522.76  | 40322.79  | 64567.98  | 59633     | 103024.1  | 23252     | 34256.21  | 35828.08  |
| 32901.09  | 98112.75  | 61660.7   | 34292.75  | 66422.77  | 62963.72  | 91383.77  | 20861.48  | 39556.91  | 34668.49  |
| 37165.59  | 90726.34  | 48435.93  | 35684.35  | 50396.63  | 64636.51  | 75201.66  | 27105.26  | 49181.84  | 47823.95  |
| 46194.38  | 102076.4  | 65974.53  | 39250.34  | 46608.33  | 58122.35  | 57417.36  | 26736.07  | 38993.49  | 44876.21  |
| 42911.09  | 103965.7  | 50798.39  | 33958.88  | 58337.7   | 59695.74  | 96373.7   | 23478.6   | 44367.56  | 45967.98  |

|           |           |           |           |           |           |           |           |           |           |
|-----------|-----------|-----------|-----------|-----------|-----------|-----------|-----------|-----------|-----------|
| LP428.337 | LP428.338 | LP428.338 | LP428.338 | LP428.338 | LP428.382 | LP428.393 | LP429.173 | LP429.173 | LP429.173 |
| 31727     | 40228.81  | 30194.39  | 56983.51  | 23854.49  | 270085.1  | 23867.25  | 119855.4  | 75217.46  | 99883.82  |
| 42175.88  | 44345.31  | 28408     | 58843.34  | 24864.35  | 276763.3  | 27815.41  | 113795.1  | 71003.08  | 98513.81  |
| 38777.11  | 40109.35  | 39070.4   | 59416.51  | 26033.36  | 378539.1  | 25340.3   | 107129.1  | 66890.81  | 94462.39  |
| 47591.36  | 58924.74  | 48878.41  | 70458.88  | 30608.1   | 259661.1  | 24047.86  | 109373.4  | 67627.91  | 88937.52  |
| 39194.69  | 46097.86  | 41357.42  | 59291.71  | 32274.46  | 268691.8  | 24687.41  | 101598.9  | 72348.79  | 95882.36  |

|           |           |           |           |           |           |           |           |           |          |
|-----------|-----------|-----------|-----------|-----------|-----------|-----------|-----------|-----------|----------|
| LP429.174 | LP429.173 | LP429.174 | LP429.174 | LP429.174 | LP429.174 | LP429.174 | LP429.174 | LP429.173 | LP429.21 |
| 154874.2  | 97281.19  | 201114.9  | 146559.9  | 180854.4  | 172243.1  | 188987.9  | 139826.9  | 184074.6  | 117156.5 |
| 154290.1  | 98318.87  | 186594.6  | 154105.1  | 180486.4  | 180495.7  | 182450.4  | 128873.1  | 183702.2  | 112522.8 |
| 142225.4  | 94196.1   | 192495.6  | 146338.4  | 174938.1  | 166380.9  | 165944.6  | 123580.4  | 171869.8  | 114763.1 |
| 149437.9  | 87125.21  | 181742.9  | 135763    | 170552.3  | 173009.1  | 181364.2  | 129434.8  | 171291.9  | 113289.4 |
| 145442.1  | 88450.28  | 203784.5  | 139489.4  | 187051.3  | 149197.5  | 170603.2  | 120304.7  | 151657.8  | 128314.1 |



|           |           |           |           |           |           |           |           |           |           |
|-----------|-----------|-----------|-----------|-----------|-----------|-----------|-----------|-----------|-----------|
| LP429.21_ | LP429.210 | LP429.211 | LP429.209 | LP429.240 | LP429.240 | LP429.239 | LP429.240 | LP429.24_ | LP429.239 |
| 145677.1  | 234695.1  | 30182.98  | 76983.71  | 363560.4  | 417917.6  | 386407.9  | 346009.9  | 397367.5  | 172738    |
| 149568    | 220196.1  | 34865.01  | 71724.41  | 504829    | 378266    | 373332.8  | 337032.2  | 436104.4  | 170905.9  |
| 147677    | 205027.3  | 34962.39  | 72209.33  | 615332.9  | 430235    | 305724.6  | 336622.9  | 299753.2  | 182495.1  |
| 150125.3  | 189559.1  | 33610.46  | 68249.01  | 535891    | 375054.3  | 332970.9  | 343686.7  | 382866.2  | 185059.6  |
| 141522.8  | 201823.4  | 37958.65  | 74874.48  | 454456    | 440134.7  | 260531.2  | 365294.3  | 432099.5  | 182521.8  |

|           |           |           |           |           |           |           |           |           |           |
|-----------|-----------|-----------|-----------|-----------|-----------|-----------|-----------|-----------|-----------|
| LP429.239 | LP429.24_ | LP429.24_ | LP429.239 | LP429.239 | LP429.239 | LP429.24_ | LP429.240 | LP429.24_ | LP429.239 |
| 155651.1  | 188804.9  | 212220.7  | 217507.8  | 228043.9  | 177365.2  | 218296.7  | 146743.4  | 283911.7  | 93234.07  |
| 146418.2  | 233108.6  | 217418.9  | 236298.8  | 257670.8  | 171501.3  | 226607.1  | 176868.8  | 214015.7  | 171073.7  |
| 136610    | 244744.2  | 212843.8  | 283564.6  | 243946.7  | 162328.9  | 234125.9  | 173730.8  | 223301.1  | 175629.9  |
| 146729.1  | 230404.2  | 201265.1  | 206188.4  | 243628.7  | 143233.6  | 219591.6  | 176106.5  | 232365.3  | 166370.3  |
| 122497.6  | 234751.4  | 201712.6  | 221298    | 251416.5  | 167385.3  | 219565.7  | 177250.9  | 211844.4  | 179199.9  |

|           |           |           |           |           |           |           |           |           |           |
|-----------|-----------|-----------|-----------|-----------|-----------|-----------|-----------|-----------|-----------|
| LP429.240 | LP429.240 | LP429.240 | LP429.240 | LP429.239 | LP429.24_ | LP429.240 | LP429.239 | LP429.240 | LP429.239 |
| 228950    | 174162    | 196782.8  | 210216.3  | 192716.6  | 251304.5  | 192331    | 179299.4  | 201398.9  | 169777.2  |
| 228452.3  | 164363.2  | 198592.4  | 210027.9  | 178940    | 199922.3  | 216318.7  | 171252.8  | 195221.5  | 165363.7  |
| 241944.4  | 172633.6  | 198918.9  | 216094.1  | 164811.5  | 194073.1  | 193091    | 168276.1  | 195493.7  | 177393.7  |
| 216921.9  | 168564.2  | 200736.3  | 227226    | 152223    | 213473.5  | 195776.2  | 140388.9  | 192885.3  | 173367    |
| 211737.2  | 178156.3  | 183194.1  | 215228.3  | 154843    | 211635.4  | 183968.7  | 166820.7  | 201150.5  | 173296.6  |

|           |           |           |           |           |           |           |           |           |           |
|-----------|-----------|-----------|-----------|-----------|-----------|-----------|-----------|-----------|-----------|
| LP429.250 | LP429.288 | LP429.385 | LP430.126 |
| 331378.9  | 15118.09  | 32039.81  | 38678.33  | 31593.16  | 46553.15  | 46587.92  | 32341.6   | 25636.9   | 28853.32  |
| 298501.7  | 18961.31  | 32619.14  | 40261.8   | 33590.73  | 48490.89  | 42283.87  | 24423.49  | 24607.11  | 33481.99  |
| 290952.1  | 14411.26  | 36721.76  | 31812.31  | 32244.59  | 45081.73  | 42304.39  | 26203.05  | 23034.78  | 30667.79  |
| 277882.6  | 13585.26  | 27577.07  | 34093.66  | 26017.68  | 45532.7   | 40824.23  | 30743.03  | 23042.78  | 26919.54  |
| 283618.9  | 13131.43  | 33652.17  | 39775.8   | 31018.09  | 45202.66  | 41439.03  | 28645.4   | 23855.26  | 29366.02  |

|           |           |           |           |           |           |           |           |           |           |
|-----------|-----------|-----------|-----------|-----------|-----------|-----------|-----------|-----------|-----------|
| LP430.126 |
| 36879.17  | 37838.18  | 46653.61  | 35973.73  | 41859.76  | 40963.13  | 37774.34  | 29624.82  | 42133.63  | 58019.57  |
| 33334.61  | 34671.71  | 38859.13  | 36003.2   | 48256.38  | 39134.76  | 32418.58  | 32083.05  | 37693.99  | 62054.92  |
| 35458.59  | 38126.22  | 46272.52  | 35874.41  | 45780.38  | 39932.61  | 33213.92  | 27134.25  | 39068.27  | 62705.91  |
| 37829.45  | 38400.67  | 44653.79  | 40663.25  | 42190.67  | 42370.76  | 30230.2   | 29605.66  | 36673.57  | 59504.32  |
| 35779.81  | 34498.68  | 43579.23  | 35286.82  | 38861.75  | 40655.06  | 30993.07  | 31662.84  | 38118.95  | 67423.95  |

|           |           |           |           |           |           |           |           |           |           |
|-----------|-----------|-----------|-----------|-----------|-----------|-----------|-----------|-----------|-----------|
| LP430.126 | LP430.126 | LP430.126 | LP430.126 | LP430.126 | LP430.126 | LP430.243 | LP430.251 | LP430.275 | LP430.280 |
| 37670.52  | 65058.95  | 29332.57  | 36877.59  | 38618.94  | 32113.43  | 139782.2  | 77645.44  | 92057.25  | 72615     |
| 38964.45  | 70893.14  | 28968.75  | 34602.94  | 38298.61  | 29413.2   | 135514.5  | 70589.29  | 96588.03  | 62864.6   |
| 38610.59  | 61751.69  | 30774.32  | 30508.81  | 34931.17  | 29284.19  | 142618.1  | 75437.78  | 90818.68  | 71407.52  |
| 36824.89  | 61678.13  | 31594.03  | 34624     | 35244.63  | 25004.39  | 152645.5  | 79414.35  | 91853.27  | 74797.65  |
| 41372.61  | 62791.77  | 28227.74  | 39737.69  | 40198.34  | 30472.08  | 134644.3  | 77978.1   | 86953.5   | 77091.98  |

|           |           |           |           |           |           |           |           |           |           |
|-----------|-----------|-----------|-----------|-----------|-----------|-----------|-----------|-----------|-----------|
| LP430.280 | LP430.280 | LP430.280 | LP430.316 |
| 115925.3  | 63259.89  | 80037.54  | 64765.71  | 76823.01  | 72928.86  | 67919.66  | 76208.52  | 97542.4   | 81467.55  |
| 118068.8  | 73848.12  | 79898.5   | 59460.88  | 64644.09  | 66548.9   | 109255.6  | 103585.9  | 59219.51  | 79576.5   |
| 111664.5  | 67669.52  | 77361.13  | 96991.7   | 58497.73  | 78429.69  | 73995.31  | 66432.52  | 63710.8   | 63656.03  |
| 107450.9  | 70107.59  | 77892.14  | 112712    | 83169.81  | 81607.93  | 68474.32  | 76673.74  | 69864.06  | 70875.68  |
| 118407.7  | 71619.32  | 78338.98  | 56163.58  | 70330.69  | 76246.55  | 87922.69  | 70986.98  | 57482.82  | 72305.48  |

|           |           |           |           |           |           |           |           |           |           |
|-----------|-----------|-----------|-----------|-----------|-----------|-----------|-----------|-----------|-----------|
| LP430.316 |
| 84172.1   | 81954.58  | 62383.23  | 67413.62  | 74612.76  | 64422.08  | 54339.87  | 90748.08  | 96800.89  | 59500.6   |
| 68931.25  | 54122.75  | 70294.61  | 84671.31  | 67228.33  | 66479.14  | 56954.5   | 97646.94  | 70794.18  | 58357.41  |
| 66359.62  | 52197.68  | 63956.79  | 80473.26  | 65535.14  | 61832.02  | 57256.31  | 94634.16  | 70059.3   | 63169.54  |
| 74615.12  | 71338.83  | 62024.43  | 76289.41  | 68088.96  | 61755.18  | 78690.3   | 97769.2   | 61270.27  | 59713.8   |
| 76925.24  | 53651.47  | 76218.63  | 79046.92  | 68258.95  | 56481.96  | 72428.94  | 92504.8   | 69802.18  | 61247.08  |



|           |           |           |           |           |           |           |           |           |           |
|-----------|-----------|-----------|-----------|-----------|-----------|-----------|-----------|-----------|-----------|
| LP430.316 |
| 60651.03  | 74072.57  | 64350.27  | 70634.9   | 64579.59  | 56303.16  | 82859.4   | 63909.39  | 62978.33  | 56444.34  |
| 62956.68  | 60032.59  | 57863.93  | 56489.19  | 64560.01  | 60151.67  | 62578.25  | 66349.61  | 68605.27  | 70966.51  |
| 62043.6   | 57680.68  | 61954.61  | 60039.74  | 59091.92  | 62101.92  | 60127.67  | 76058.88  | 80730.1   | 75155.29  |
| 63845.42  | 58361.18  | 74029.81  | 55495.58  | 64409.74  | 60498.33  | 57851.6   | 62436.84  | 75610.01  | 68266.02  |
| 59137.79  | 56011.92  | 58252.34  | 56456.04  | 62586.21  | 67559.36  | 50547.4   | 66404.68  | 75503.61  | 68299.8   |

|           |           |           |           |           |           |           |           |           |           |
|-----------|-----------|-----------|-----------|-----------|-----------|-----------|-----------|-----------|-----------|
| LP430.316 |
| 57084.45  | 77167.8   | 87122.54  | 58495.78  | 88196.29  | 53415.49  | 57968.03  | 46236.75  | 70525.42  | 75682.99  |
| 56534.8   | 66379.05  | 65683.36  | 60925.78  | 82984.6   | 57788.05  | 58711.25  | 69121.05  | 59773.48  | 55761.52  |
| 56320.71  | 69873.69  | 70221.11  | 61383.24  | 75027.5   | 53580.11  | 57293.41  | 63648.62  | 54752.71  | 55463.09  |
| 56354.03  | 72946.32  | 67985.49  | 66746.43  | 85499.46  | 51397.54  | 55513.4   | 67841.14  | 68190.56  | 57786.33  |
| 56298.96  | 77060.73  | 58105.58  | 63217.21  | 78374.9   | 54966.85  | 54898.51  | 57814.27  | 59586.15  | 50457.84  |

|           |           |           |           |           |           |           |           |           |           |
|-----------|-----------|-----------|-----------|-----------|-----------|-----------|-----------|-----------|-----------|
| LP430.316 | LP430.317 | LP430.316 | LP430.317 |
| 80222.98  | 51097.84  | 76420.74  | 79363.69  | 67228.52  | 60272.7   | 53235.15  | 49315.16  | 60959.24  | 57713.78  |
| 76577.98  | 50877.69  | 83750.82  | 45220.34  | 68894.65  | 62401.21  | 53617.53  | 45228.05  | 60600.17  | 56075.57  |
| 82601.81  | 50821.21  | 70488.58  | 48064.39  | 74896.57  | 60873.8   | 46108.7   | 47926.83  | 58144.28  | 61252.13  |
| 77727.21  | 83616.12  | 63903.75  | 41113.66  | 72774.06  | 57624.71  | 52116.28  | 53892.26  | 60045.91  | 65636.32  |
| 80623.11  | 45336.32  | 68469.11  | 41064.54  | 63902.55  | 63176.73  | 56737.17  | 48512.92  | 58218.65  | 59085.07  |

|           |           |           |           |           |           |           |           |           |           |
|-----------|-----------|-----------|-----------|-----------|-----------|-----------|-----------|-----------|-----------|
| LP430.316 | LP430.316 | LP430.316 | LP430.316 | LP430.316 | LP430.317 | LP430.316 | LP430.316 | LP430.316 | LP430.316 |
| 65878.96  | 53342.31  | 51535.07  | 57089.6   | 63700.6   | 83000.64  | 36303.12  | 51281.29  | 47503.75  | 79134.52  |
| 55775.63  | 46915.08  | 51242.94  | 51867.92  | 59682.64  | 96864.32  | 39677.02  | 52601.11  | 58533.15  | 73734.46  |
| 66322.49  | 47037.69  | 49533.15  | 54353.81  | 55687.79  | 90535.84  | 35877.74  | 53395.98  | 56610.51  | 69736.17  |
| 59039.99  | 51474.15  | 53152.18  | 50829.26  | 60302.9   | 88249.51  | 37150.5   | 53777.76  | 47483.93  | 70720.72  |
| 54358.67  | 43271.02  | 52364.21  | 52639.56  | 70685.19  | 90686.56  | 35191.23  | 52637.84  | 47885.6   | 69322.08  |

|           |           |           |           |           |           |           |           |           |           |
|-----------|-----------|-----------|-----------|-----------|-----------|-----------|-----------|-----------|-----------|
| LP430.316 | LP430.316 | LP430.316 | LP430.317 | LP430.316 | LP430.316 | LP430.316 | LP430.316 | LP430.316 | LP430.317 |
| 59445.36  | 67132.95  | 59927.68  | 53591.31  | 80599.54  | 68020.09  | 37284.98  | 74433.75  | 44997.86  | 50847.49  |
| 63553.78  | 60065.96  | 66108.98  | 58254.83  | 46072.95  | 61858.1   | 32629.91  | 63242.93  | 45711.41  | 51037.55  |
| 61961.22  | 49557.08  | 60297.97  | 64536.82  | 49014.54  | 60350.47  | 38809.48  | 63217.33  | 43219.17  | 50145.93  |
| 61235.43  | 54535.18  | 54741.33  | 64468.61  | 49230.17  | 59922.87  | 36919.24  | 64916.77  | 39568.07  | 49834.6   |
| 49171.97  | 56224.17  | 56128.05  | 61518.45  | 47467.37  | 69725.05  | 37639.11  | 61461.41  | 46448.16  | 49773.59  |

|           |           |           |           |           |           |           |           |           |           |
|-----------|-----------|-----------|-----------|-----------|-----------|-----------|-----------|-----------|-----------|
| LP430.316 | LP430.316 | LP430.316 | LP430.316 | LP430.317 | LP430.316 | LP430.316 | LP430.316 | LP430.365 | LP430.389 |
| 71045.09  | 45367.7   | 55193.63  | 39470.18  | 45002.27  | 33133.31  | 58374.83  | 39234.08  | 56517.81  | 425172.9  |
| 70851.54  | 44452.71  | 56822.72  | 34822.62  | 44658.02  | 35217.1   | 50900.11  | 43291.09  | 55144     | 564089    |
| 69846.33  | 42198.79  | 58236.73  | 42511.11  | 45492.22  | 34219.71  | 55169.03  | 41606.15  | 60895.82  | 331486.7  |
| 70593.47  | 39005.98  | 58969.55  | 40251.16  | 42349.06  | 30956.91  | 50877.61  | 40653.48  | 58619.63  | 319706.3  |
| 65162.21  | 42896.62  | 53111.99  | 34853.67  | 39050.65  | 32287.91  | 51720.07  | 40812.23  | 54722.79  | 420685.3  |

|           |           |           |           |           |           |           |           |           |           |
|-----------|-----------|-----------|-----------|-----------|-----------|-----------|-----------|-----------|-----------|
| LP430.404 | LP431.169 | LP431.178 | LP431.188 | LP431.189 | LP431.188 | LP431.189 | LP431.189 | LP431.189 | LP431.189 |
| 31404.92  | 110200.4  | 691353.3  | 136941.5  | 171377.2  | 74253.69  | 174395.8  | 126250    | 83725.2   | 119468    |
| 26221.59  | 130526.3  | 682717.4  | 136558.8  | 170412.7  | 84516.22  | 149339.8  | 127293.5  | 92819.62  | 107567.6  |
| 27100.95  | 113651.1  | 653235.1  | 127655.8  | 173830.4  | 79534.44  | 168355.1  | 127932.7  | 84648.97  | 113500.1  |
| 29219.08  | 101034.5  | 589222.3  | 136340.1  | 172960.2  | 74656.18  | 172411.3  | 110138.9  | 72606.15  | 103544.6  |
| 26978.63  | 128417.6  | 595171.6  | 135595.6  | 171533.9  | 89792.14  | 153384.7  | 121038.1  | 86580.58  | 113583.9  |

|           |           |           |           |           |           |           |           |           |           |
|-----------|-----------|-----------|-----------|-----------|-----------|-----------|-----------|-----------|-----------|
| LP431.189 | LP431.188 | LP431.189 |
| 119181.1  | 98303.91  | 122798.4  | 195008.4  | 90727.62  | 83451.35  | 86570.27  | 132054.5  | 110221.1  | 127964.6  |
| 114094.3  | 111123.7  | 107626.4  | 178260    | 89781.57  | 81095.07  | 90624.7   | 137021.1  | 108862.3  | 117835.8  |
| 125953.3  | 104535.1  | 107722.8  | 189680.9  | 81016.71  | 84706.25  | 81718.41  | 135521.6  | 114890.3  | 123464.2  |
| 122182.1  | 105059.2  | 105870.9  | 187048.7  | 79861.02  | 89626.94  | 94706.95  | 134879.4  | 121987.7  | 127984.4  |
| 118121.4  | 96027.2   | 113478    | 179262.9  | 70742.71  | 88335.63  | 88543.69  | 127097    | 121183.4  | 114451.3  |



|           |           |           |           |           |           |           |           |           |           |           |
|-----------|-----------|-----------|-----------|-----------|-----------|-----------|-----------|-----------|-----------|-----------|
| LP431.189 |
| 112101.5  | 111652.7  | 120059.2  | 106164.5  | 58415.48  | 118365.3  | 497312.2  | 76025.78  | 59292     | 74035.88  |           |
| 114062.9  | 117128    | 112680.6  | 106994    | 59602.42  | 128735.8  | 473847    | 77778.61  | 60330.29  | 77141.25  |           |
| 107825.3  | 114748.4  | 102570.4  | 106634.6  | 53939.51  | 116888.6  | 448789.9  | 72287.61  | 52582.15  | 76920.63  |           |
| 103543.5  | 113311.7  | 119164.9  | 95292.18  | 58442.68  | 115255.7  | 398949.6  | 78245.4   | 49585.2   | 63983.26  |           |
| 107858.8  | 114071    | 109260.6  | 107792.6  | 58966.94  | 119514.8  | 416994    | 78877.9   | 55501.03  | 75073.55  |           |

|           |           |           |           |           |           |           |           |           |           |
|-----------|-----------|-----------|-----------|-----------|-----------|-----------|-----------|-----------|-----------|
| LP431.189 | LP431.188 | LP431.189 | LP431.189 |
| 92650.71  | 74505.29  | 95482.03  | 70154.29  | 127843.7  | 86404.97  | 80463.24  | 109018.3  | 112556.8  | 114764.8  |
| 93002.21  | 84921.04  | 109924.2  | 70042.45  | 113538.2  | 82900.14  | 82060.05  | 102209.9  | 115288.7  | 116437.2  |
| 86463.44  | 81799.78  | 101457.5  | 67810.26  | 125885.1  | 70829.73  | 76466.79  | 105915.2  | 109000.6  | 118076.6  |
| 87775.17  | 78999.8   | 97260.43  | 62136.62  | 110650.4  | 78652.79  | 70920.9   | 87246.75  | 117474.4  | 113621.5  |
| 92513.65  | 75728.01  | 99635.56  | 65385.37  | 113748.6  | 83608.98  | 83912.13  | 105938.5  | 116501.2  | 117485.2  |

|           |           |           |           |           |           |           |           |           |           |
|-----------|-----------|-----------|-----------|-----------|-----------|-----------|-----------|-----------|-----------|
| LP431.189 |
| 97784     | 147422.1  | 77804.77  | 126332.9  | 122504.5  | 86770.32  | 102379.2  | 93472.61  | 112666.6  | 113903    |
| 93238.74  | 147043.2  | 76393.57  | 118648.4  | 123145    | 102933.1  | 108276.8  | 92107.22  | 108167.3  | 108857.6  |
| 82324.26  | 151540.1  | 71937.13  | 127214.3  | 120357.7  | 106252.9  | 112511.3  | 93106.18  | 96434.51  | 112771.7  |
| 88049.24  | 136678.9  | 69340.8   | 124819    | 119270.8  | 98106.55  | 95689.7   | 83237.67  | 105136.7  | 103421.7  |
| 94562.56  | 153719.8  | 75862.85  | 128701.4  | 117602.3  | 102771    | 106775    | 95037     | 110222.7  | 110898    |

|           |           |           |           |           |           |           |           |           |           |           |
|-----------|-----------|-----------|-----------|-----------|-----------|-----------|-----------|-----------|-----------|-----------|
| LP431.189 |
| 125045.4  | 125809.6  | 96690.37  | 78066.87  | 69440.34  | 121213.9  | 101925.3  | 87693.2   | 144978.2  | 75117.37  |           |
| 133506.8  | 125007.3  | 104885.4  | 71566.82  | 67150.02  | 122950.7  | 98198.21  | 88032.26  | 167407.1  | 78894.35  |           |
| 122665.9  | 124059.1  | 91370.37  | 64319.22  | 70707.78  | 128528.3  | 102644.1  | 82424.66  | 156715.4  | 72011.88  |           |
| 130833.5  | 126668.6  | 100344    | 65978.8   | 71603.58  | 131457.1  | 111344.1  | 79401.92  | 156194.6  | 73168.56  |           |
| 115553.4  | 134881.6  | 98926.25  | 67121.28  | 84720.24  | 125406.8  | 110113.6  | 80807.24  | 162659.4  | 72248.04  |           |

|           |           |           |           |           |           |           |           |           |           |
|-----------|-----------|-----------|-----------|-----------|-----------|-----------|-----------|-----------|-----------|
| LP431.189 | LP431.188 | LP431.189 | LP431.189 | LP431.189 | LP431.189 | LP431.189 | LP431.189 | LP431.188 | LP431.188 |
| 121732.3  | 90184.4   | 75087.09  | 102408    | 54108.62  | 93317.2   | 130385.5  | 105059.8  | 61260.57  | 42605.86  |
| 124652.2  | 90583.82  | 76966.95  | 99546.14  | 56237.58  | 88943.69  | 131462    | 120053.5  | 57637.08  | 50502.77  |
| 114852.2  | 88115.51  | 83912.01  | 91343.51  | 50051.99  | 93340.7   | 129578.3  | 104768.6  | 58056.11  | 42813.84  |
| 107822.1  | 82735.66  | 69348.44  | 90600.04  | 46549.6   | 95650.18  | 126193.1  | 112777.8  | 57258.29  | 42145.61  |
| 122726.2  | 85457.33  | 70468.91  | 96650.31  | 54948.76  | 99455.12  | 139053.9  | 117732.8  | 57243.39  | 38603.35  |

|           |           |           |           |           |           |           |           |           |           |
|-----------|-----------|-----------|-----------|-----------|-----------|-----------|-----------|-----------|-----------|
| LP431.188 | LP431.188 | LP431.188 | LP431.188 | LP431.188 | LP431.189 | LP431.188 | LP431.188 | LP431.188 | LP431.188 |
| 29173.14  | 36605     | 28187.46  | 25977.8   | 77824.43  | 75602.97  | 26311.44  | 21249.79  | 27951.69  | 22085.26  |
| 25723.82  | 32917.99  | 28893.33  | 26800.26  | 72748.18  | 73700.19  | 26231.99  | 18091.21  | 28459.53  | 23039.83  |
| 23421.96  | 31619.52  | 30138.27  | 25697.25  | 65626.78  | 66866.31  | 20103.78  | 21483     | 21974.39  | 18968.26  |
| 23582.93  | 28765.72  | 24974.55  | 23802.08  | 71073.86  | 75376.86  | 24514.95  | 18694.18  | 20914.49  | 17220.68  |
| 22753.06  | 33270.9   | 25510.86  | 27230.5   | 75538.33  | 71910.11  | 21372.05  | 17340.78  | 24081.54  | 24466.91  |

|           |           |           |           |           |           |           |           |           |           |
|-----------|-----------|-----------|-----------|-----------|-----------|-----------|-----------|-----------|-----------|
| LP431.188 | LP431.188 | LP431.188 | LP431.188 | LP431.188 | LP431.209 | LP431.226 | LP431.226 | LP431.226 | LP431.226 |
| 34260.13  | 51666.42  | 217902.4  | 24063.14  | 36269.75  | 125277.5  | 125276.8  | 146364.3  | 125372.3  | 158997.2  |
| 36354.19  | 51298.32  | 326253.4  | 22718.42  | 32639.8   | 111768.6  | 152657.3  | 142690.2  | 126072.7  | 178269.7  |
| 29310.32  | 46259.96  | 236248.7  | 20318.18  | 29039.92  | 169762.2  | 135188.9  | 131376.1  | 123110    | 169477.6  |
| 32623.03  | 44148.19  | 308654.1  | 20721.41  | 24297.18  | 214974    | 138165.5  | 116497.7  | 117568.7  | 166366    |
| 31262.88  | 47306.65  | 225320.9  | 24200.77  | 32496.6   | 184269.6  | 146839.4  | 130284.4  | 115380.6  | 150563.3  |

|           |           |           |           |           |           |           |           |           |           |
|-----------|-----------|-----------|-----------|-----------|-----------|-----------|-----------|-----------|-----------|
| LP431.226 | LP431.278 | LP431.384 | LP431.443 | LP432.172 | LP432.212 | LP432.238 | LP432.238 | LP432.238 | LP432.238 |
| 269778.2  | 18234.01  | 149100.6  | 38073.1   | 86822.85  | 104294.2  | 85136.78  | 230361.8  | 92168.07  | 158009.7  |
| 236243.6  | 19749.44  | 153562.7  | 30117.79  | 95058.05  | 105491.6  | 168309.2  | 179071.1  | 102822    | 169661.7  |
| 233558.3  | 16475.35  | 143612.1  | 25203.94  | 84625.46  | 102194.7  | 149364.8  | 149084.3  | 104813.5  | 174994.3  |
| 232069.1  | 17708.56  | 106992.4  | 22816.86  | 101281.2  | 107427.1  | 159330    | 146264.6  | 140992.6  | 229459.7  |
| 246120.6  | 17727.55  | 130357.3  | 27694.71  | 100687.2  | 103991.1  | 143371.1  | 142083.7  | 100934.9  | 117830.8  |



|           |           |           |           |           |           |           |           |           |           |
|-----------|-----------|-----------|-----------|-----------|-----------|-----------|-----------|-----------|-----------|
| LP432.238 |
| 145364.2  | 241394.7  | 224305    | 167498.4  | 111182.5  | 122517.6  | 230512.8  | 150947.9  | 126763.4  | 178717.8  |
| 117431.6  | 155548.1  | 197927.1  | 127122.7  | 201479.2  | 112628.2  | 225637.2  | 145523.8  | 165986.4  | 178756.2  |
| 142686    | 176586.8  | 200792.1  | 164485.6  | 157286.1  | 141789    | 213152.2  | 149762.2  | 109009.5  | 210550.3  |
| 129614.1  | 248712.3  | 206583.9  | 225688.7  | 180345.9  | 136145    | 234764.5  | 144185.2  | 120516.7  | 260410.9  |
| 158921.4  | 194590.5  | 241486.4  | 158462.3  | 141000.2  | 253940.9  | 226884    | 135680    | 153533.8  | 205447.6  |

|           |           |           |           |           |           |           |           |           |           |
|-----------|-----------|-----------|-----------|-----------|-----------|-----------|-----------|-----------|-----------|
| LP432.238 |
| 211609.3  | 194415.1  | 179231    | 132453.6  | 110818.5  | 171243.8  | 209756.9  | 124149.4  | 155026.8  | 257331.6  |
| 133195.6  | 141916.3  | 159709.2  | 124921    | 90674.04  | 155278.1  | 156485.2  | 162281.8  | 232051    | 132492.9  |
| 182873    | 206434.1  | 169336.2  | 208314.1  | 130220.5  | 210238.7  | 139077.8  | 169535.7  | 170673.4  | 140303.5  |
| 226186.9  | 137862.3  | 179515.1  | 119590.8  | 120438.3  | 143213.7  | 166569.8  | 168603.8  | 169460.1  | 231356    |
| 192396.3  | 183817.8  | 178803.1  | 125090.2  | 105351.3  | 137846.6  | 195481.8  | 164142.2  | 200811.2  | 142070.4  |

|           |           |           |           |           |           |           |           |           |           |
|-----------|-----------|-----------|-----------|-----------|-----------|-----------|-----------|-----------|-----------|
| LP432.238 | LP432.239 | LP432.238 |
| 167262.9  | 149713.2  | 108442.4  | 91949.84  | 88136.61  | 215354    | 161646.7  | 114705.8  | 160026.6  | 177230.4  |
| 175655.7  | 158981.6  | 123629.5  | 151021.5  | 114057.8  | 211400.7  | 132452.2  | 119138.8  | 160659.6  | 132746.2  |
| 136743.7  | 111447.7  | 127581.7  | 91265.38  | 112705.4  | 126550    | 132697.4  | 145517.7  | 159943.2  | 141188.4  |
| 139081    | 153860.7  | 98678.77  | 129047.7  | 101812.9  | 213911.3  | 132200.4  | 117366.6  | 159066.5  | 129765.4  |
| 154759.3  | 168112.6  | 106513    | 111823.3  | 105509.9  | 139380.1  | 121196.2  | 135984.1  | 180130.1  | 138806.7  |

|           |           |           |           |           |           |           |           |           |           |
|-----------|-----------|-----------|-----------|-----------|-----------|-----------|-----------|-----------|-----------|
| LP432.238 |
| 154261.3  | 131401.9  | 61052.34  | 84268.15  | 167469.8  | 125184.9  | 164449.6  | 164154.6  | 177499    | 157501.1  |
| 150410.2  | 130794.9  | 62691.5   | 83599.85  | 113746.6  | 124630.8  | 144311    | 150623.1  | 133925.4  | 168351.7  |
| 110261.6  | 152655.6  | 43388.1   | 96170.84  | 116307.4  | 156900    | 126367.9  | 166494.7  | 187706.9  | 135892.4  |
| 196877.1  | 142895.5  | 68640.2   | 88174.16  | 111767    | 150811.9  | 138067.1  | 182527.7  | 137220.8  | 146715.8  |
| 150093.4  | 141666.5  | 70819.33  | 103942.3  | 117227.7  | 145724.4  | 142304.1  | 151159    | 131982.5  | 196931.7  |

|           |           |           |           |           |           |           |           |           |           |
|-----------|-----------|-----------|-----------|-----------|-----------|-----------|-----------|-----------|-----------|
| LP432.238 |
| 114907.9  | 122092.4  | 100820    | 122908.1  | 113959.8  | 128209.3  | 142543.5  | 85260.27  | 126849    | 130227.9  |
| 123678.9  | 133205.4  | 107316.2  | 100375.6  | 122894    | 137399.1  | 130574.7  | 101888.8  | 122101    | 92450.64  |
| 120498.3  | 112599.3  | 85172.39  | 142970.9  | 113147    | 146210    | 84321.63  | 85417.06  | 119423.2  | 97143.38  |
| 126193.3  | 150392.9  | 110154.3  | 111451.7  | 116756    | 135070.2  | 143428.6  | 105381.6  | 138128.2  | 95579.19  |
| 137583.7  | 140151    | 109232.8  | 121051.9  | 106961.7  | 129700.7  | 132716.4  | 107011.2  | 119932.5  | 103157.2  |

|           |           |           |           |           |           |           |           |           |           |
|-----------|-----------|-----------|-----------|-----------|-----------|-----------|-----------|-----------|-----------|
| LP432.238 | LP432.238 | LP432.239 | LP432.238 |
| 122358.1  | 91085.75  | 112725.9  | 77843.58  | 84076.69  | 101824.6  | 83848.43  | 130157.7  | 178406.1  | 36794.9   |
| 165585.3  | 82677.22  | 106666.5  | 76044.11  | 84566.8   | 97926.62  | 84516.95  | 122618.4  | 133357.6  | 33523.94  |
| 101317.5  | 94875.15  | 107665.1  | 83664.57  | 72808.9   | 96822.62  | 157369.1  | 127471.9  | 95335.33  | 37912.08  |
| 85117.65  | 70361.84  | 106083.4  | 88755.34  | 86156.42  | 105647.9  | 122182.2  | 123619    | 144684.4  | 35723.59  |
| 98065.41  | 73975.47  | 105143.6  | 79199.11  | 75337.26  | 111610.8  | 85804.97  | 146112.1  | 140251.1  | 31914.25  |

| LP432.238 | LP432.238 | LP432.238 | LP432.2383_1.85 |
|-----------|-----------|-----------|-----------------|
| 64819.62  | 138635    | 36727.4   | 56262.16        |
| 70961.89  | 82777.46  | 45119.75  | 53806.8         |
| 76001.48  | 82854.19  | 50792.57  | 51640.16        |
| 64974.77  | 79153.78  | 36224.78  | 48538.54        |
| 67345.1   | 82149.24  | 44647.08  | 51301.42        |
