# Supplementary material for: Untargeted Multimodal Metabolomics Investigation of the Haemonchus contortus Exsheathment Secretome
Source: MDPI journal article supplement (doi:10.3390/cells11162525), 2022-08-15
Supplement: s1 [file s1]

| Treatment | HN57.9747 | HN129.962 | HN134.046 | HN163.039 | HN167.020 | HN212.920 | HN223.060 | HN229.071 | HN233.060 |
|-----------|-----------|-----------|-----------|-----------|-----------|-----------|-----------|-----------|-----------|
| PBS       | 39736.59  | 8945.667  | 12027.37  | 8571.739  | 331070.2  | 8308.28   | 363.9706  | 18504.07  | 812.3506  |
| PBS       | 38644.02  | 9023.883  | 13284.49  | 8302.6    | 363208.9  | 8863.991  | 227.2641  | 17973.65  | 734.041   |
| PBS       | 38169.9   | 8392.475  | 13280.3   | 7477.957  | 326880.5  | 8173      | 107.8954  | 17079.79  | 454.1975  |
| PBS       | 42244.25  | 9887.319  | 11795.93  | 8705.347  | 355009.4  | 9745.863  | 226.0324  | 16943.31  | 523.683   |
| PBS       | 38171.15  | 8626.688  | 11770.26  | 8651.256  | 347218.7  | 7545.504  | 224.5612  | 17830.8   | 1103.575  |

|           |           |           |           |           |           |           |           |           |           |
|-----------|-----------|-----------|-----------|-----------|-----------|-----------|-----------|-----------|-----------|
| HN98.9482 | HN135.011 | HN183.847 | HN327.087 | HN165.055 | HN206.854 | HN213.076 | HN259.097 | HN380.843 | HN59.9705 |
| 1082739   | 1885.146  | 6595.682  | 725.7523  | 1952.17   | 117.3902  | 21871.01  | 4591.366  | 4963.518  | 10385.98  |
| 1191000   | 2059.482  | 4661.106  | 875.7932  | 2485.102  | 417.9187  | 21362.54  | 4230.368  | 4686.062  | 9925.55   |
| 1181754   | 1726.152  | 7332.383  | 246.7136  | 1180.311  | 112.7975  | 18691.7   | 2851.928  | 3554.84   | 9973.109  |
| 1535205   | 1699.385  | 7102.933  | 1896.061  | 1443.834  | 282.1427  | 20113.89  | 3120.625  | 5343.978  | 9917.558  |
| 1401414   | 1695.078  | 6798.576  | 0         | 1194.255  | 392.9436  | 19496.41  | 3411.229  | 4602.8    | 9274.985  |

|           |           |           |           |           |          |           |           |           |           |
|-----------|-----------|-----------|-----------|-----------|----------|-----------|-----------|-----------|-----------|
| HN118.021 | HN168.962 | HN191.072 | HN245.066 | HN257.081 | HN94.979 | HN185.081 | HN217.107 | HN248.740 | HN250.738 |
| 417696.4  | 955.2641  | 9914.438  | 8705.447  | 6201.627  | 24879.22 | 13657.11  | 5417.295  | 6701.777  | 16157.01  |
| 415892.3  | 1512.584  | 7615.925  | 7757.327  | 6501.578  | 25593.23 | 13941.34  | 5573.133  | 7411.628  | 18397.31  |
| 418845    | 749.4756  | 9702.073  | 7919.794  | 5489.457  | 24415.98 | 12236.23  | 4348.086  | 8106.275  | 18161.38  |
| 408413    | 1433.623  | 8054.691  | 7433.078  | 7217.371  | 23986.37 | 13313.87  | 4296.767  | 7118.88   | 17064.98  |
| 428551.9  | 1239.984  | 7237.679  | 7233.263  | 5943.312  | 24819.75 | 12026.62  | 5394.66   | 8255.082  | 19252.97  |

|           |           |           |           |           |           |           |           |           |           |
|-----------|-----------|-----------|-----------|-----------|-----------|-----------|-----------|-----------|-----------|
| HN252.736 | HN203.055 | HN253.092 | HN164.835 | HN152.034 | HN214.075 | HN232.924 | HN61.9874 | HN100.945 | HN164.071 |
| 10859.57  | 9345.769  | 4622.217  | 1666116   | 110313.4  | 548.1679  | 1354.614  | 275037.9  | 341492.8  | 206687    |
| 11885.72  | 9451.541  | 4088.132  | 1544792   | 135945.2  | 616.0522  | 4425.024  | 264190.9  | 377722.2  | 208170.7  |
| 12112.52  | 8486.082  | 3703.525  | 1801229   | 126294.8  | 524.932   | 2195.617  | 268952.2  | 378550.7  | 201194.2  |
| 11445.78  | 9313.135  | 4859.668  | 1681352   | 125916.4  | 1108.766  | 7731.332  | 271623.9  | 485704.9  | 193749.7  |
| 12357.41  | 9126.773  | 4072.176  | 1638773   | 131789.4  | 585.483   | 2110.994  | 274190.8  | 445761.4  | 200589.3  |

|           |           |           |           |           |           |           |           |           |           |
|-----------|-----------|-----------|-----------|-----------|-----------|-----------|-----------|-----------|-----------|
| HN199.804 | HN213.916 | HN214.048 | HN83.0495 | HN189.035 | HN280.908 | HN315.087 | HN117.054 | HN153.018 | HN209.045 |
| 1063258   | 77533.97  | 120088.5  | 6830.184  | 5520.998  | 29567.6   | 124.8186  | 34756.23  | 11820.69  | 7930.278  |
| 1046677   | 106405.3  | 128296    | 5933.883  | 6041.226  | 29383.14  | 1001.242  | 37030.63  | 13495.01  | 10399.29  |
| 945030.7  | 104663.6  | 105478.1  | 7314.479  | 7018.832  | 27874.55  | 555.4585  | 33327.82  | 11052.87  | 9253.442  |
| 909173.9  | 82215.96  | 131893.5  | 9530.462  | 6939.194  | 31154.32  | 825.3727  | 34461.31  | 12033.39  | 9620.061  |
| 1036960   | 99344.93  | 121605.2  | 8340.537  | 5979.955  | 28751.91  | 305.6682  | 35374.17  | 11432.84  | 8755.763  |

|           |          |          |          |          |          |          |          |          |          |
|-----------|----------|----------|----------|----------|----------|----------|----------|----------|----------|
| HN215.091 | HN90.932 | HN130.95 | HN161.84 | HN195.81 | HN197.80 | HN285.70 | HN89.023 | HN98.972 | HN215.03 |
| 29566.43  | 156906.2 | 41776.72 | 105733.8 | 1783160  | 2066776  | 2553.47  | 1231471  | 241416.7 | 85850.82 |
| 31802.32  | 156812.1 | 50019.1  | 107529.8 | 1708153  | 2198867  | 3105.754 | 1280673  | 231566.4 | 79252.73 |
| 30257.33  | 155400.1 | 120710.3 | 106723.5 | 1622504  | 2017960  | 2979.333 | 1351180  | 229998   | 67781.54 |
| 27444.19  | 151600.7 | 49585.71 | 110685.7 | 1637444  | 1991701  | 3299.951 | 1698186  | 234723.3 | 83614.87 |
| 28627.5   | 149791.4 | 69982.13 | 109724.1 | 1769510  | 2042783  | 3858.246 | 1316518  | 229550.9 | 76589.61 |

|          |          |          |          |          |          |          |          |          |          |
|----------|----------|----------|----------|----------|----------|----------|----------|----------|----------|
| HN166.83 | HN204.79 | HN186.08 | HN180.93 | HN78.918 | HN80.915 | HN135.03 | HN206.78 | HN332.92 | HN296.68 |
| 43342.29 | 59143.35 | 35531.66 | 107824.1 | 124579.8 | 124888.9 | 334978   | 85058.43 | 40460.48 | 95.92649 |
| 42344.34 | 54929.35 | 38832.7  | 112721.8 | 131507.3 | 132226.4 | 326506.6 | 78749.33 | 43849.04 | 114.4861 |
| 40177.91 | 61694.85 | 36025.84 | 97717.99 | 125263.6 | 118555   | 331751.7 | 91762.49 | 46782.31 | 250.425  |
| 43453.4  | 58805.35 | 34264.42 | 129041.8 | 133581.5 | 133197.2 | 312163.4 | 86209.83 | 45713.92 | 225.5328 |
| 41451.37 | 59880.99 | 36391.93 | 107435   | 118502.8 | 118732.5 | 319517.2 | 90759.55 | 39942.9  | 0        |

|          |          |          |          |          |          |          |          |          |          |
|----------|----------|----------|----------|----------|----------|----------|----------|----------|----------|
| HN294.68 | HN330.87 | HN146.04 | HN197.80 | HN195.81 | HN195.04 | HN219.03 | HN588.89 | HN61.98  | HN162.83 |
| 101.2138 | 30770.21 | 177493.1 | 4621382  | 3795489  | 196623.9 | 176890.6 | 127163   | 631531.5 | 5778670  |
| 307.8444 | 35252.58 | 188378.6 | 4680497  | 3712997  | 348451.3 | 180706.4 | 116839.4 | 504445.4 | 5574728  |
| 458.5469 | 20648.26 | 155593.6 | 4968468  | 3916836  | 367081.7 | 194393.3 | 128494.7 | 458103.1 | 6069271  |
| 249.5833 | 36303.8  | 191368.9 | 4516714  | 3576850  | 426419   | 182683.9 | 119995.6 | 517478.3 | 6220471  |
| 243.0363 | 29252.31 | 188360.1 | 4630198  | 3686414  | 387951   | 158587.3 | 125187.2 | 467118.7 | 5734952  |



HN178.879 HN118.050 HN217.039 HN134.8939\_12.57

13050.15 161162.5 575006.1 527997.5

12240.62 164937.4 583119.3 526045.1

12178.44 147376 488017.1 532699.4

12415.47 172848 601940.3 403759.8

12104.18 157856.5 518547.8 442924.2
