# Supplementary material for: Untargeted Multimodal Metabolomics Investigation of the Haemonchus contortus Exsheathment Secretome
Source: MDPI journal article supplement (doi:10.3390/cells11162525), 2022-08-15
Supplement: s1 [file s1]

|           |           |           |           |           |           |           |           |           |           |
|-----------|-----------|-----------|-----------|-----------|-----------|-----------|-----------|-----------|-----------|
| Treatment | CN98.9486 | CN100.945 | CN149.060 | CN165.055 | CN201.113 | CN202.116 | CN229.144 | CN230.147 | CN187.097 |
| PBS       | 8193.11   | 1167.805  | 0         | 5971.098  | 12845.28  | 503.1235  | 8772.881  | 565.3428  | 49481.42  |
| PBS       | 9533.267  | 810.0545  | 384.358   | 10068.61  | 15565.27  | 341.8457  | 8130.85   | 0         | 50769.55  |
| PBS       | 10038.57  | 600.1545  | 392.5627  | 12147.68  | 19492.43  | 648.1764  | 9911.283  | 131.5201  | 64815.46  |
| PBS       | 10999.3   | 1134.629  | 302.5189  | 9355.729  | 19040.31  | 1135.945  | 11260.39  | 163.7893  | 82404.93  |
| PBS       | 11242.67  | 286.4914  | 743.2662  | 8762.756  | 19253.94  | 515.0542  | 10832.1   | 121.9578  | 72543.12  |

|           |           |           |           |           |           |           |           |           |           |
|-----------|-----------|-----------|-----------|-----------|-----------|-----------|-----------|-----------|-----------|
| CN188.100 | CN203.056 | CN216.132 | CN195.810 | CN127.016 | CN410.820 | CN80.9164 | CN153.019 | CN164.835 | CN197.807 |
| 4637.684  | 3319.294  | 390.1286  | 395754.7  | 830.5754  | 2723.565  | 4622.508  | 14153.17  | 201704.3  | 488066.3  |
| 3866.574  | 3131.218  | 274.048   | 347545.6  | 680.0252  | 3166.558  | 4324.275  | 9159.258  | 163958.4  | 550385.5  |
| 4983.882  | 4877.984  | 283.0738  | 381378.5  | 1765.976  | 4279.266  | 4994.241  | 19653.23  | 261312    | 496012.1  |
| 7042.788  | 4978.264  | 400.5252  | 346814.3  | 1253.881  | 4108.057  | 5668.366  | 11731.24  | 198196.9  | 454561.2  |
| 6349.38   | 4367.966  | 369.1629  | 408761.2  | 1556.944  | 4432.946  | 6189.578  | 9472.886  | 248780.6  | 533488.2  |

|           |           |           |           |           |           |           |           |           |           |
|-----------|-----------|-----------|-----------|-----------|-----------|-----------|-----------|-----------|-----------|
| CN260.871 | CN317.951 | CN162.838 | CN174.085 | CN215.128 | CN257.176 | CN309.902 | CN78.9184 | CN249.963 | CN223.061 |
| 1687.594  | 27946.65  | 903023.6  | 451.8163  | 8598.246  | 0         | 131.9078  | 3769.961  | 34110.33  | 823.1449  |
| 1360.946  | 29382.81  | 712859.2  | 759.3939  | 7794.245  | 255.4758  | 145.805   | 3861.662  | 34598.09  | 187.2923  |
| 1343.771  | 30214.15  | 706788.9  | 985.7852  | 6883.399  | 222.381   | 167.9599  | 4950.146  | 35475.25  | 713.077   |
| 1925.42   | 32984.3   | 892747.6  | 745.5474  | 11480.74  | 100.1958  | 154.507   | 4317.999  | 39278.57  | 147.0977  |
| 1275.503  | 35498.25  | 800585    | 1158.951  | 9913.563  | 373.4091  | 457.3212  | 4656.055  | 39682.31  | 182.0176  |

|           |           |           |           |           |           |           |           |           |           |
|-----------|-----------|-----------|-----------|-----------|-----------|-----------|-----------|-----------|-----------|
| CN164.956 | CN199.804 | CN214.933 | CN502.632 | CN118.930 | CN244.163 | CN78.9585 | CN120.927 | CN253.944 | CN330.754 |
| 408971.1  | 271786.7  | 404941.1  | 51678.25  | 24818.45  | 645.9668  | 454230.3  | 5657.373  | 1845.259  | 85211.54  |
| 579085.7  | 244706.7  | 368447.7  | 43213.07  | 22243.98  | 740.493   | 353832.8  | 5276.103  | 5166.645  | 68777.64  |
| 344591.7  | 307340    | 361784.2  | 32123.91  | 20100.59  | 175.6732  | 361633.9  | 3874.922  | 5688.866  | 53943.73  |
| 442319.7  | 240182.9  | 391927.8  | 37772.95  | 25465.8   | 679.097   | 371259.9  | 5438.433  | 4877.287  | 57373.61  |
| 413350.6  | 255433.2  | 394849.4  | 41195.96  | 24457.75  | 766.7324  | 379243.3  | 5332.76   | 4327.884  | 58014.96  |

|           |           |           |           |           |           |           |           |           |           |
|-----------|-----------|-----------|-----------|-----------|-----------|-----------|-----------|-----------|-----------|
| CN330.879 | CN80.9744 | CN82.9714 | CN132.945 | CN145.041 | CN232.944 | CN311.962 | CN326.759 | CN408.744 | CN470.698 |
| 311.6341  | 3207924   | 1430835   | 1134070   | 1266.442  | 104465.3  | 1118.72   | 262448.7  | 69624.46  | 63555.43  |
| 218.8055  | 2910142   | 1292516   | 1014587   | 920.1204  | 108870.3  | 706.1481  | 206540.5  | 58201.47  | 47637.51  |
| 2849.829  | 3215055   | 1458624   | 1331843   | 1063.981  | 86461.36  | 0         | 156605.1  | 47157.74  | 40850.66  |
| 215.5849  | 3763335   | 1700555   | 1241325   | 584.5351  | 98932.39  | 1308.001  | 193956.6  | 54803     | 48071.52  |
| 2251.33   | 3678183   | 1685282   | 1471610   | 574.0131  | 102790.2  | 541.7574  | 182145.3  | 52039.42  | 45835.13  |

|           |           |           |           |           |           |           |           |           |           |
|-----------|-----------|-----------|-----------|-----------|-----------|-----------|-----------|-----------|-----------|
| CN315.087 | CN145.05C | CN159.06E | CN173.081 | CN180.93C | CN198.917 | CN265.144 | CN284.91E | CN292.827 | CN324.762 |
| 130.7002  | 30512.16  | 24117.9   | 25360.37  | 7964.191  | 77526.93  | 2044.776  | 27279.55  | 84181.59  | 133100.8  |
| 147.0224  | 22821.95  | 20076.66  | 25282.09  | 10091.5   | 65146.01  | 1405.702  | 23370.08  | 69343.67  | 106898.4  |
| 158.2306  | 35346.78  | 29000.37  | 30406.47  | 8065.299  | 66663.29  | 2078.963  | 16325.97  | 51657.73  | 78132.49  |
| 0         | 39303.96  | 27938.3   | 34251.61  | 9219.2    | 64149.39  | 2139.654  | 18903.91  | 63316.76  | 104792.8  |
| 173.1415  | 36370.68  | 28916.2   | 33819.23  | 10949.83  | 74954.4   | 1231.983  | 19007.63  | 51816.08  | 94482     |

|           |           |           |           |           |           |           |           |           |           |
|-----------|-----------|-----------|-----------|-----------|-----------|-----------|-----------|-----------|-----------|
| CN328.756 | CN348.815 | CN243.123 | CN214.836 | CN237.076 | CN94.9246 | CN96.9217 | CN131.034 | CN209.045 | CN222.868 |
| 203383.9  | 29870.39  | 130.643   | 56479.2   | 145.0402  | 4755557   | 786866.3  | 22152.46  | 8260.789  | 83268.41  |
| 165563.5  | 28207.8   | 457.0947  | 52699.78  | 227.3875  | 4039819   | 666301.1  | 15818.31  | 8660.98   | 75662.64  |
| 126457.7  | 20968.63  | 146.4445  | 40892.51  | 0         | 3265104   | 546798.8  | 20594.48  | 10109.68  | 52882.84  |
| 155523.3  | 26916.02  | 424.1478  | 43329.51  | 169.0947  | 4167884   | 695673.1  | 26786.47  | 10341.44  | 75819.89  |
| 145385.5  | 25724.44  | 0         | 44908.26  | 410.6704  | 3958188   | 651111.1  | 24762.92  | 10062.02  | 66676.32  |

|           |           |           |           |           |           |           |           |           |           |
|-----------|-----------|-----------|-----------|-----------|-----------|-----------|-----------|-----------|-----------|
| CN243.160 | CN272.795 | CN342.874 | CN410.741 | CN295.055 | CN128.959 | CN154.880 | CN159.978 | CN209.045 | CN213.076 |
| 7270.779  | 139063.6  | 34006.28  | 127880.9  | 0         | 26783.41  | 479920.5  | 5841.565  | 7615.777  | 1787.175  |
| 8171.298  | 111078.8  | 30164.94  | 113335.6  | 610.4708  | 25263.55  | 401130.9  | 2087.801  | 6554.244  | 450.3133  |
| 6968.555  | 79072.84  | 24723.91  | 85915.5   | 156.2154  | 29616.32  | 311558.7  | 1232.179  | 8259.354  | 2248.636  |
| 9370.692  | 107975.4  | 31549.98  | 104537.2  | 1081.691  | 32721.04  | 413316.7  | 3539.57   | 8348.487  | 1446.585  |
| 10429.7   | 102833.4  | 27640.14  | 94669.73  | 459.216   | 26992.38  | 371916    | 5286.508  | 9338.048  | 1226.039  |



|           |           |           |           |           |           |           |           |           |           |
|-----------|-----------|-----------|-----------|-----------|-----------|-----------|-----------|-----------|-----------|
| CN215.056 | CN215.092 | CN226.965 | CN270.845 | CN274.839 | CN330.801 | CN160.975 | CN160.841 | CN166.860 | CN289.920 |
| 430.9431  | 593.0423  | 15600.45  | 508206.2  | 151247.2  | 345609.8  | 18606.24  | 894870.8  | 48676.26  | 2103.026  |
| 242.5878  | 337.0689  | 9633.574  | 416564.9  | 126109.5  | 287551.9  | 23026.05  | 460250.5  | 41300.79  | 0         |
| 476.2091  | 1157.881  | 5617.799  | 326471    | 97434.85  | 217967.2  | 24848.37  | 723617.4  | 32072.74  | 139.5487  |
| 1618.816  | 2205.078  | 9956.927  | 447688.2  | 130366.1  | 293951.2  | 25611.95  | 518798.2  | 41789.67  | 528.2464  |
| 1206.736  | 2499.684  | 11700.99  | 355710.9  | 108825.8  | 237820    | 25182.49  | 766434.7  | 41057.18  | 182.6404  |

|           |           |           |           |           |           |           |           |           |           |
|-----------|-----------|-----------|-----------|-----------|-----------|-----------|-----------|-----------|-----------|
| CN176.935 | CN186.085 | CN96.9691 | CN321.923 | CN400.909 | CN142.974 | CN138.027 | CN248.96C | CN344.778 | CN174.955 |
| 132983.9  | 12726.67  | 7374661   | 37682.21  | 12862.04  | 588035.6  | 5629.166  | 751915.9  | 44116.38  | 34957.46  |
| 143438.2  | 17055.92  | 8593064   | 46479.12  | 13354.05  | 656024.4  | 4958.237  | 799349.8  | 40864.58  | 38896.25  |
| 209245.4  | 16106.43  | 7496936   | 54429.3   | 15651.22  | 422133.3  | 6175.254  | 804188    | 32590.89  | 28163.06  |
| 136522.6  | 22993.63  | 9760599   | 41948.01  | 14913.53  | 713396.4  | 5094.305  | 877007.6  | 38668.12  | 32621.11  |
| 209785.6  | 20419.13  | 8028262   | 50114.94  | 17150.25  | 738291.7  | 4739.46   | 922012    | 39303.41  | 33790.01  |

|           |           |           |           |           |           |           |           |           |           |
|-----------|-----------|-----------|-----------|-----------|-----------|-----------|-----------|-----------|-----------|
| CN238.931 | CN240.928 | CN137.024 | CN224.819 | CN117.018 | CN172.899 | CN232.902 | CN261.889 | CN244.897 | CN360.239 |
| 142332.5  | 42023.19  | 117564.2  | 32825.35  | 372822.6  | 55152.48  | 118792.8  | 1315.226  | 52887.59  | 33473.04  |
| 144148.7  | 40561.34  | 107923.7  | 26676.65  | 316417    | 60607.31  | 123797.8  | 1814.164  | 47173.39  | 31742.55  |
| 170634.5  | 50943.65  | 127836.1  | 30171.15  | 228181.5  | 63111.72  | 99586.79  | 3800.841  | 36458.76  | 27017.36  |
| 182537.6  | 56212.25  | 106002.9  | 30495.28  | 254152.9  | 69378.6   | 110993.5  | 3230.844  | 37114.1   | 618099.5  |
| 191081.3  | 56349.74  | 114261.1  | 34038.26  | 275713.8  | 71010.1   | 118877.1  | 3910.675  | 38514.2   | 28568.78  |

|           |           |           |           |           |           |           |           |           |           |
|-----------|-----------|-----------|-----------|-----------|-----------|-----------|-----------|-----------|-----------|
| CN450.760 | CN392.801 | CN188.951 | CN110.898 | CN190.948 | CN390.757 | CN230.9_C | CN108.901 | CN216.881 | CN228.860 |
| 72716.47  | 110870.9  | 110708.4  | 67658.8   | 70787.12  | 127286.7  | 71946.66  | 117065.6  | 91492.97  | 140338.6  |
| 60134.25  | 103504.1  | 123062.1  | 58363.86  | 82370.54  | 103127.5  | 79621.6   | 100020.4  | 78453.57  | 128759.6  |
| 51784.84  | 80068.77  | 93065.54  | 44187.52  | 60888.3   | 80325.92  | 73698.54  | 85622.49  | 55441.31  | 114180.9  |
| 67221.57  | 107479.5  | 117999.9  | 66605.91  | 77861.45  | 108537.1  | 82502.96  | 112044.7  | 75570.82  | 140080    |
| 49189.61  | 82444.97  | 118294.7  | 67696.6   | 75635.47  | 86810.83  | 82765.25  | 111521.9  | 60949.8   | 138824.6  |

|           |           |           |           |           |           |           |           |                 |
|-----------|-----------|-----------|-----------|-----------|-----------|-----------|-----------|-----------------|
| CN312.885 | CN284.775 | CN180.972 | CN248.918 | CN265.148 | CN112.985 | CN392.752 | CN217.039 | CN113.9886_0.61 |
| 48401.24  | 57135.41  | 543185.9  | 88040.27  | 438548.3  | 3997017   | 47417.28  | 101612.2  | 83358.11        |
| 46606.32  | 46355.11  | 603075.8  | 91356.67  | 502196.7  | 4099986   | 96172.15  | 97042.18  | 83563.67        |
| 41238.97  | 28767.36  | 576213.7  | 98941.51  | 419198.3  | 3607905   | 31094.35  | 82571.33  | 71827.65        |
| 44724.71  | 47666.68  | 665336.9  | 105113.6  | 649022.5  | 4349816   | 100867.8  | 72810.83  | 92256.57        |
| 46191.17  | 39926.93  | 700820.2  | 104125.5  | 511855.5  | 4679913   | 38713.31  | 104608.9  | 96802.38        |
