# Supplementary material for: Untargeted Multimodal Metabolomics Investigation of the Haemonchus contortus Exsheathment Secretome
Source: MDPI journal article supplement (doi:10.3390/cells11162525), 2022-08-15
Supplement: s1 [file s1]

| Treatment | HP69.0452 | HP72.0812 | HP79.9901 | HP136.061 | HP144.101 | HP155.081 | HP156.101 | HP156.101 |
|-----------|-----------|-----------|-----------|-----------|-----------|-----------|-----------|-----------|
| PBS       | 31609.38  | 100934.9  | 82499.46  | 40631.45  | 13850.17  | 55371.7   | 40034.71  | 11261     |
| PBS       | 32169.4   | 101284.7  | 81201.71  | 38709.28  | 13871.22  | 54672.79  | 40000.91  | 11001.69  |
| PBS       | 33348.85  | 94547.86  | 83028.61  | 37262.26  | 14454.4   | 53640.1   | 43998.49  | 11574.83  |
| PBS       | 31818.24  | 97162.58  | 81840.5   | 38941.04  | 13599.39  | 55952.24  | 39704.2   | 10782.67  |
| PBS       | 30800.68  | 95046.08  | 74225.26  | 36034.78  | 13752.27  | 52377.71  | 38530.12  | 10518.29  |

|           |           |           |           |           |           |           |           |           |           |
|-----------|-----------|-----------|-----------|-----------|-----------|-----------|-----------|-----------|-----------|
| HP166.086 | HP166.086 | HP191.079 | HP268.103 | HP87.1002 | HP130.086 | HP206.138 | HP86.0968 | HP137.045 | HP146.117 |
| 65105.88  | 659205.3  | 75855.88  | 12595.43  | 9996.426  | 65848.23  | 1804.81   | 49962.41  | 1315592   | 323796.9  |
| 62281.11  | 572406.1  | 87033.88  | 10850.22  | 10557.41  | 63135.69  | 2081.825  | 46857.66  | 1235277   | 303011.9  |
| 64674.3   | 610027.4  | 78445.83  | 15544.89  | 10041.44  | 67246.78  | 4858.216  | 48271.16  | 1284580   | 308959.9  |
| 62108.52  | 583850.2  | 74933.63  | 9921.812  | 10281.83  | 66025.72  | 1832.383  | 46508.53  | 1245669   | 307816.2  |
| 62531.21  | 563946.3  | 76259.78  | 10705.81  | 10014.18  | 68385.97  | 1251.968  | 46014.35  | 1193115   | 293360    |

|           |           |           |           |           |           |           |           |           |           |
|-----------|-----------|-----------|-----------|-----------|-----------|-----------|-----------|-----------|-----------|
| HP152.056 | HP119.089 | HP130.086 | HP142.069 | HP176.128 | HP203.067 | HP141.065 | HP143.067 | HP160.096 | HP112.050 |
| 13949.19  | 154154.3  | 57050.79  | 10600.12  | 1506.123  | 166222.2  | 79107.19  | 634936.1  | 21430.84  | 43722.97  |
| 13625.77  | 131177.9  | 58684.86  | 9740.068  | 2130.936  | 163126.2  | 75589.74  | 667794.9  | 18384.14  | 38489.99  |
| 13618.11  | 141007.6  | 58523.28  | 10974.48  | 1446.277  | 174268.2  | 80999.92  | 622672.3  | 16599.11  | 46198.52  |
| 13622.01  | 148221.5  | 56638.28  | 10841.63  | 1267.076  | 169112.3  | 83611.68  | 624116.8  | 16392.73  | 42922.83  |
| 13634.16  | 130268    | 60880.08  | 11079.63  | 1469.521  | 178169.5  | 86031.13  | 634018    | 17403.16  | 44107.83  |

|           |           |           |           |           |           |           |           |           |           |
|-----------|-----------|-----------|-----------|-----------|-----------|-----------|-----------|-----------|-----------|
| HP73.0845 | HP123.1_1 | HP274.873 | HP90.0554 | HP157.105 | HP189.123 | HP95.084_ | HP159.041 | HP108.949 | HP186.112 |
| 10153.24  | 60211.4   | 34536.81  | 364824    | 29087     | 15635.41  | 26535.86  | 146272.7  | 34044.74  | 8354.743  |
| 10187.29  | 61375.4   | 29278.85  | 233525.3  | 29215.31  | 13961.94  | 21896.29  | 87166.54  | 27913.8   | 5949.844  |
| 9896.064  | 60573.69  | 40190.29  | 384100    | 29582.87  | 17347.9   | 26852.36  | 201834.5  | 32357.21  | 10666.1   |
| 10236.8   | 61655.34  | 37722.6   | 377590.5  | 29356.42  | 17543.45  | 25862.8   | 175394.7  | 30178.78  | 9483.391  |
| 10185.69  | 60321.64  | 39508.1   | 368561.9  | 30627.84  | 17529.72  | 24748.73  | 188768.3  | 26924.39  | 10909.21  |

|           |           |           |           |           |           |           |           |           |           |
|-----------|-----------|-----------|-----------|-----------|-----------|-----------|-----------|-----------|-----------|
| HP310.912 | HP378.899 | HP90.0553 | HP150.058 | HP186.148 | HP340.047 | HP102.074 | HP140.010 | HP91.9804 | HP227.954 |
| 89319.55  | 67093.6   | 94281.59  | 163812.2  | 6670.091  | 124279.1  | 447612.9  | 723258.3  | 366311.6  | 426156.6  |
| 72321.51  | 67883.12  | 33759.15  | 120370.2  | 6000.897  | 94083.36  | 483615.3  | 400776.5  | 338219.3  | 381320.4  |
| 85319.16  | 73390.69  | 124810.9  | 149464.9  | 7069.842  | 121161.3  | 511214.7  | 887300.3  | 361567.5  | 408862.2  |
| 82658     | 71892.07  | 110083.1  | 147130.2  | 6530.387  | 103617.6  | 485521.2  | 849253.2  | 360206.3  | 396391.1  |
| 76222.27  | 63368.15  | 112094    | 140385.8  | 4896.539  | 106427.3  | 493194.8  | 873427    | 340666.6  | 384234.3  |

|           |           |           |           |           |           |           |           |           |           |
|-----------|-----------|-----------|-----------|-----------|-----------|-----------|-----------|-----------|-----------|
| HP94.0805 | HP228.955 | HP171.149 | HP105.110 | HP258.109 | HP259.113 | HP159.967 | HP185.164 | HP230.095 | HP104.107 |
| 1374970   | 136215.1  | 681121.1  | 131397.7  | 2097356   | 163415.4  | 197876.7  | 72025.51  | 80032.25  | 75741.29  |
| 936909.1  | 124831.4  | 714719.6  | 126201.8  | 571088    | 44326.33  | 180786.9  | 65812.39  | 29340.91  | 27886.66  |
| 1440955   | 136061.6  | 740487.7  | 134891.7  | 2827135   | 223045.3  | 186839.7  | 66995.06  | 99556.24  | 104771.4  |
| 1439235   | 130751.4  | 725333.1  | 130236.4  | 2600443   | 198664.9  | 177709.5  | 68498.84  | 93787.06  | 96578.59  |
| 1469085   | 124519.7  | 695433.2  | 127109.3  | 2614079   | 207844    | 178757.8  | 64891.15  | 109824.3  | 101367.7  |

|           |           |           |           |           |           |           |           |                  |
|-----------|-----------|-----------|-----------|-----------|-----------|-----------|-----------|------------------|
| HP132.065 | HP391.284 | HP116.107 | HP87.0557 | HP216.063 | HP132.102 | HP116.143 | HP74.0969 | HP141.1133_10.79 |
| 283862.8  | 338321.8  | 1028418   | 194886    | 61886.66  | 522055.4  | 675719.4  | 2039660   | 243032.3         |
| 191937.4  | 627691.8  | 1951861   | 200587    | 30886.72  | 511182.6  | 669300.1  | 2998908   | 239641.1         |
| 420049.5  | 336807.5  | 1868723   | 193882    | 92749.03  | 471198.8  | 684645.4  | 3010481   | 249116           |
| 373163.4  | 320707.5  | 1916150   | 197321.1  | 80855.74  | 448987.9  | 680092.7  | 1387755   | 245177.4         |
| 362610.5  | 633775    | 1893238   | 202625.4  | 88370.1   | 432901.9  | 814440    | 3410893   | 242514.4         |
