# Supplementary material for: Untargeted Multimodal Metabolomics Investigation of the Haemonchus contortus Exsheathment Secretome
Source: MDPI journal article supplement (doi:10.3390/cells11162525), 2022-08-15
Supplement: s1 [file s1]

|           |           |           |           |           |           |           |           |           |           |
|-----------|-----------|-----------|-----------|-----------|-----------|-----------|-----------|-----------|-----------|
| Treatment | CP362.187 | CP489.938 | CP102.511 | CP103.509 | CP114.518 | CP122.924 | CP155.974 | CP169.990 | CP175.096 |
| PBS       | 33632.77  | 60057.58  | 4476.29   | 7246.949  | 391.3864  | 26119.06  | 25990.06  | 9236.695  | 8561.192  |
| PBS       | 32153.81  | 63248.81  | 6661.595  | 11078.95  | 1125.358  | 26045.75  | 22679.04  | 8097.961  | 10722.82  |
| PBS       | 39724.3   | 57745.36  | 8322.777  | 15911.83  | 2082.053  | 18807.52  | 24970.86  | 9562.77   | 10904.84  |
| PBS       | 33512.07  | 47927.33  | 8848.969  | 15597.46  | 1913.597  | 19257.87  | 26190.94  | 8482.004  | 12113.21  |
| PBS       | 31019.48  | 51739.83  | 9193.368  | 11925.49  | 1358.946  | 20593.92  | 24685.68  | 9907.72   | 11097.14  |

|           |           |           |           |           |           |           |           |           |           |
|-----------|-----------|-----------|-----------|-----------|-----------|-----------|-----------|-----------|-----------|
| CP189.112 | CP190.086 | CP190.912 | CP212.118 | CP219.026 | CP232.162 | CP232.896 | CP236.141 | CP246.178 | CP248.891 |
| 24200.06  | 3074.533  | 4853.304  | 40470.36  | 4023.669  | 2425.36   | 124201    | 12283.19  | 1914.076  | 22704.34  |
| 23835.72  | 5716.5    | 6403.399  | 47620.56  | 4189.708  | 2374.018  | 122736.9  | 10218.97  | 1713.665  | 20884.04  |
| 24762.59  | 6020.18   | 5259.109  | 44906.49  | 3677.915  | 2474.125  | 113406.3  | 10275.69  | 2285.991  | 20860.66  |
| 26856.82  | 6121.23   | 5582.735  | 43851.7   | 3076.671  | 2481.697  | 120909.7  | 11086.97  | 2273.711  | 19507.26  |
| 29144.6   | 6929.103  | 6109.819  | 46931.74  | 3520.205  | 2377.591  | 122131.1  | 12544.7   | 2556.294  | 21273.67  |

|           |           |           |           |           |           |           |           |           |           |
|-----------|-----------|-----------|-----------|-----------|-----------|-----------|-----------|-----------|-----------|
| CP352.876 | CP116.017 | CP221.033 | CP240.839 | CP243.929 | CP250.868 | CP256.899 | CP294.897 | CP429.240 | CP104.509 |
| 159130.6  | 33786.83  | 17428.99  | 3363.206  | 6876.313  | 1963.279  | 8829.304  | 540640.6  | 47950.87  | 2106.659  |
| 149535.2  | 21954.21  | 11534.38  | 2159.836  | 6708.654  | 2265.781  | 11141.53  | 567869.8  | 45180.7   | 789.3495  |
| 156670.3  | 26886.27  | 9885.413  | 2059.668  | 7680.05   | 770.0165  | 12659.86  | 550021.8  | 44547.9   | 3656.093  |
| 160565.7  | 26815.96  | 8750.915  | 2040.866  | 8186.418  | 2419.918  | 11452.4   | 552683.6  | 43397.16  | 3810.011  |
| 174266.7  | 23806.88  | 11540.54  | 1381.06   | 7338.171  | 1367.929  | 14024.29  | 771823    | 46522.11  | 3641.973  |

|           |           |           |           |           |           |           |           |           |           |
|-----------|-----------|-----------|-----------|-----------|-----------|-----------|-----------|-----------|-----------|
| CP115.519 | CP117.015 | CP238.842 | CP266.054 | CP104.107 | CP135.530 | CP150.058 | CP170.854 | CP186.149 | CP193.930 |
| 1057.558  | 7702.756  | 5529.56   | 42962.91  | 612664.8  | 1682.045  | 127243    | 6746.653  | 4264.878  | 378321.5  |
| 1452.897  | 4815.399  | 1848.353  | 47339.75  | 561779    | 4949.063  | 123525.6  | 5034.338  | 3831.691  | 258843.5  |
| 2528.145  | 6323.288  | 3355.703  | 35940.73  | 507507    | 9480.57   | 109199.8  | 5391.442  | 3161.538  | 331886.4  |
| 2933.628  | 6264.681  | 4152.523  | 33826.99  | 499214.9  | 8675.814  | 102272.8  | 6368.993  | 2820.181  | 318197.4  |
| 2555.317  | 5299.48   | 3563.738  | 39738.27  | 515592.6  | 6093.345  | 112572.9  | 4443.047  | 3545.897  | 300704.7  |

|           |           |           |           |           |           |           |           |           |           |
|-----------|-----------|-----------|-----------|-----------|-----------|-----------|-----------|-----------|-----------|
| CP111.055 | CP172.851 | CP117.041 | CP120.014 | CP132.102 | CP135.065 | CP137.528 | CP162.112 | CP257.936 | CP274.839 |
| 13176.6   | 4832.732  | 2119.888  | 6677.862  | 16765.52  | 14171.83  | 6035.99   | 467806.6  | 22031.83  | 45193.8   |
| 17272.85  | 3672.138  | 1989.651  | 5608.24   | 18829.88  | 13590.87  | 4791.37   | 435257.4  | 24462.85  | 49767.86  |
| 13674.52  | 3587.419  | 2638.638  | 6286.716  | 14269.23  | 15198.73  | 7785.622  | 404564.4  | 19309.76  | 48959.13  |
| 12560.38  | 5096.336  | 2845.147  | 6484.839  | 15291.6   | 15884.4   | 7136.457  | 382177    | 20862.15  | 46628.15  |
| 12663.26  | 3041.188  | 1874.874  | 5164.644  | 16962.58  | 16031.27  | 7465.546  | 397747    | 17556.77  | 47315.39  |

|           |           |           |           |           |           |           |           |           |           |
|-----------|-----------|-----------|-----------|-----------|-----------|-----------|-----------|-----------|-----------|
| CP376.858 | CP394.874 | CP362.253 | CP132.101 | CP115.075 | CP176.936 | CP216.073 | CP365.105 | CP516.676 | CP112.895 |
| 261.7125  | 749.6337  | 38631.12  | 409029.5  | 58481.12  | 7019.487  | 1753.316  | 37391.41  | 42782.16  | 29913.73  |
| 851.6562  | 671.225   | 41505.05  | 389588.2  | 55925.19  | 7951.144  | 1605.313  | 38496.42  | 35273.1   | 25968.05  |
| 1526.864  | 833.8226  | 29383.71  | 353911.6  | 63285.49  | 8364.534  | 2717.153  | 40740.15  | 35088.71  | 26036.65  |
| 1502.979  | 1127.009  | 702144.3  | 334177.6  | 63705.6   | 10181.28  | 2728.073  | 31355.03  | 34567.25  | 28681.98  |
| 2873.189  | 1078.066  | 27267.35  | 349159    | 70803.71  | 11310.87  | 2163.045  | 35243.52  | 27957.01  | 23078.58  |

|           |           |           |           |           |           |           |           |           |           |
|-----------|-----------|-----------|-----------|-----------|-----------|-----------|-----------|-----------|-----------|
| CP116.040 | CP192.065 | CP203.052 | CP217.107 | CP225.091 | CP350.150 | CP442.826 | CP566.889 | CP376.732 | CP434.738 |
| 14729.37  | 823.8579  | 26117.2   | 15454.28  | 8534.183  | 1015.536  | 10451.62  | 70777.75  | 53273.07  | 76591.01  |
| 11204.63  | 914.3028  | 20444.95  | 10386.13  | 7933.353  | 1077.92   | 9520.421  | 75043.13  | 37096.15  | 63532.16  |
| 12726.42  | 1062.408  | 20631.37  | 9130.134  | 8502.86   | 878.2617  | 8666.389  | 85235.59  | 39049.02  | 67013.46  |
| 12410.09  | 1248.547  | 19664.12  | 9549.011  | 8781.512  | 774.5963  | 7353.936  | 91233.13  | 39638.86  | 62282.03  |
| 12840.54  | 933.178   | 18309.17  | 9357.646  | 8062.5    | 659.3806  | 7064.155  | 103279.7  | 28754.71  | 51684.77  |

|           |           |           |           |           |           |           |           |           |           |
|-----------|-----------|-----------|-----------|-----------|-----------|-----------|-----------|-----------|-----------|
| CP89.0599 | CP150.932 | CP176.070 | CP190.115 | CP212.852 | CP228.955 | CP311.091 | CP378.900 | CP430.696 | CP490.652 |
| 19259.8   | 122013.1  | 3450.855  | 3957.992  | 4967.602  | 31652.01  | 1650.261  | 25024.45  | 108712.9  | 65194.93  |
| 13603.2   | 106929.8  | 3146.054  | 6804.917  | 2156.336  | 34218.26  | 2412.133  | 29516.07  | 70860.76  | 42075.76  |
| 16202.58  | 110425.4  | 4088.905  | 6492.716  | 2192.914  | 35705.15  | 2861.18   | 33487.47  | 80473.88  | 48080.2   |
| 15120.67  | 111656.8  | 3662.414  | 6847.211  | 2897.251  | 37104.68  | 2563.368  | 37492.63  | 80423.51  | 49383.17  |
| 17087.18  | 127527.6  | 4118.56   | 6197.307  | 3929.386  | 40336.35  | 2878.777  | 40119.95  | 50569.9   | 30279.11  |



|           |           |           |           |           |           |           |           |           |           |
|-----------|-----------|-----------|-----------|-----------|-----------|-----------|-----------|-----------|-----------|
| CP492.649 | CP182.902 | CP201.112 | CP295.942 | CP432.693 | CP432.741 | CP86.0966 | CP94.5456 | CP112.006 | CP194.081 |
| 40425.17  | 10773.56  | 31533.87  | 26302.29  | 102311.4  | 47235.54  | 15757.15  | 25222.56  | 1162844   | 9445.306  |
| 26242.68  | 9295.107  | 30358.33  | 26579.63  | 69082.55  | 46813.26  | 13253.67  | 20343.85  | 1164565   | 10348.48  |
| 29779.36  | 10089.23  | 35982.89  | 27412.88  | 77943.41  | 43026.72  | 14970.1   | 20971.92  | 1110875   | 7479.569  |
| 31295.35  | 9437.578  | 35698.99  | 28714.85  | 77629.14  | 40238.57  | 14353.28  | 21872.44  | 1037534   | 8373.031  |
| 18801.77  | 10306.86  | 39624.99  | 33065.23  | 47864.4   | 37991.1   | 16371.39  | 32562.2   | 1429648   | 9526.841  |

|           |           |           |           |           |           |           |           |           |           |
|-----------|-----------|-----------|-----------|-----------|-----------|-----------|-----------|-----------|-----------|
| CP216.923 | CP227.955 | CP229.143 | CP308.847 | CP320.818 | CP330.894 | CP352.898 | CP373.874 | CP498.901 | CP514.679 |
| 1331337   | 91831.68  | 13949.38  | 3763.293  | 51975.46  | 26451.65  | 155238.3  | 802.2151  | 96120     | 52937.17  |
| 1235630   | 107458.7  | 14847.04  | 3885.45   | 46788.22  | 26191.79  | 145992.6  | 1322.413  | 101386.2  | 39360.45  |
| 1174817   | 105995.7  | 16082.65  | 3998.893  | 46260.17  | 23858.96  | 150684.4  | 2939.929  | 117241.9  | 44269.67  |
| 1164395   | 114238.1  | 14843.91  | 3466.03   | 46041.67  | 21770.92  | 155565.3  | 3404.766  | 126644.3  | 39425.05  |
| 1195005   | 125666.2  | 16233.15  | 4424.817  | 44680.03  | 25341.58  | 170202.6  | 2786.192  | 133456    | 32875.54  |

|           |           |           |           |           |           |           |           |           |           |
|-----------|-----------|-----------|-----------|-----------|-----------|-----------|-----------|-----------|-----------|
| CP130.016 | CP130.065 | CP140.903 | CP153.040 | CP217.143 | CP259.190 | CP272.944 | CP284.910 | CP297.206 | CP340.803 |
| 15970.99  | 10245.59  | 900339.5  | 64913.64  | 7061.463  | 3421.817  | 17033.59  | 220194.2  | 5806.281  | 105640.5  |
| 6390.979  | 8569.375  | 833339.9  | 103112.9  | 9765.113  | 3158.203  | 19489.51  | 230073.2  | 5279.134  | 87634.47  |
| 5584.026  | 9233.356  | 790900.1  | 68718.76  | 7687.588  | 3455.334  | 24244.56  | 209644.2  | 5559.466  | 87000.97  |
| 4638.848  | 9378.146  | 794190    | 81819.07  | 8876.008  | 3105.09   | 26327.94  | 218100.1  | 5164.818  | 84171.5   |
| 7879.634  | 10116.41  | 826286.5  | 69198.93  | 8633.848  | 3941.715  | 36002.88  | 239105.9  | 6653.477  | 72176.49  |

|           |           |           |           |           |           |           |           |           |           |
|-----------|-----------|-----------|-----------|-----------|-----------|-----------|-----------|-----------|-----------|
| CP362.926 | CP396.764 | CP456.720 | CP520.842 | CP95.5457 | CP123.099 | CP129.020 | CP151.035 | CP152.041 | CP198.862 |
| 308035.3  | 62474.48  | 104496.9  | 6544.29   | 1930.015  | 19469.49  | 17821.95  | 173180.9  | 15501.79  | 727075.2  |
| 351805.6  | 48194.46  | 77618.94  | 8808.221  | 3046.064  | 18430.18  | 14617.41  | 126680.6  | 12730.67  | 618317.3  |
| 371131.4  | 50082.84  | 85358.79  | 10579.5   | 5511.749  | 21062.85  | 12278.57  | 115076.7  | 12104.7   | 631241.8  |
| 391134.2  | 45336.68  | 79372.7   | 8076.027  | 3784.211  | 20936.98  | 12751.91  | 130288.5  | 9974.042  | 617322.3  |
| 442135.9  | 37093.71  | 62797.71  | 8888.253  | 2422.124  | 23747.8   | 18057.86  | 213984.2  | 18601     | 547787.6  |

|           |           |           |           |           |           |           |           |           |           |
|-----------|-----------|-----------|-----------|-----------|-----------|-----------|-----------|-----------|-----------|
| CP204.131 | CP231.903 | CP253.943 | CP256.821 | CP299.091 | CP318.821 | CP349.147 | CP324.735 | CP128.019 | CP161.080 |
| 8236.886  | 68599.99  | 1576.684  | 622802.2  | 2159.616  | 173844.1  | 313.0033  | 40505.7   | 80750.72  | 9546.761  |
| 6227.911  | 54899.87  | 2482.747  | 501418.6  | 3188.887  | 179818.8  | 655.1501  | 38058.77  | 69848.87  | 11072.98  |
| 7270.262  | 87628.37  | 1951.871  | 486875.6  | 2523.903  | 157711.7  | 376.4704  | 35569.9   | 35455.72  | 9425.289  |
| 7173.518  | 83798.46  | 909.1373  | 489425.7  | 2707.974  | 153413.6  | 581.1915  | 36759.11  | 27632.4   | 10139.72  |
| 7859.29   | 75799.58  | 969.3007  | 424323    | 2516.154  | 150813.1  | 636.8143  | 47500.36  | 40165.03  | 11858.29  |

|           |           |           |           |           |           |           |           |           |           |
|-----------|-----------|-----------|-----------|-----------|-----------|-----------|-----------|-----------|-----------|
| CP190.05_ | CP237.185 | CP239.935 | CP244.923 | CP245.174 | CP256.94_ | CP258.110 | CP280.847 | CP94.0453 | CP95.044_ |
| 11745.43  | 8600.929  | 272050.7  | 23272.14  | 7695.828  | 4369.976  | 27694.32  | 292728    | 287866.7  | 39063.17  |
| 9148.209  | 7878.492  | 229760.5  | 22245.48  | 8539.469  | 1884.319  | 30425.85  | 257331.8  | 234458.9  | 29548.78  |
| 9798.068  | 8515.97   | 281605.3  | 22210.64  | 8699.503  | 443.4345  | 26767.47  | 255402.4  | 201409.1  | 27658.54  |
| 10821.74  | 8395.541  | 275280.9  | 22642.79  | 8179.865  | 533.1213  | 22590.77  | 237010.7  | 207792.4  | 35434.71  |
| 11062.46  | 8226.887  | 287274.9  | 24636.22  | 8810.904  | 3420.275  | 26315.39  | 217874.6  | 425235.1  | 45185.49  |

|           |           |           |           |           |           |           |           |           |           |
|-----------|-----------|-----------|-----------|-----------|-----------|-----------|-----------|-----------|-----------|
| CP124.922 | CP130.086 | CP146.496 | CP149.940 | CP152.035 | CP157.105 | CP169.097 | CP182.950 | CP189.888 | CP190.05_ |
| 30422.52  | 11489.22  | 8745.442  | 243085.6  | 18263.47  | 20726.21  | 13901.22  | 3544331   | 76402.22  | 5353.651  |
| 22666.27  | 9767.557  | 7792.695  | 180750.1  | 14626.94  | 15691.53  | 14643.02  | 3058595   | 106354.1  | 4772.556  |
| 28470.45  | 10122.93  | 4185.172  | 229945.8  | 13845.73  | 22205.84  | 19346.41  | 4347790   | 105799.6  | 6521.599  |
| 27506.81  | 11163.91  | 10298.82  | 231909.7  | 11334.55  | 22273.64  | 21849.1   | 4386891   | 106902    | 6118.224  |
| 22664.13  | 10186.2   | 15396.59  | 234893.6  | 15823.14  | 22841.03  | 22179.24  | 4545115   | 153315.4  | 6150.981  |

|           |           |           |           |           |           |           |           |           |           |
|-----------|-----------|-----------|-----------|-----------|-----------|-----------|-----------|-----------|-----------|
| CP191.091 | CP273.180 | CP274.873 | CP299.091 | CP502.825 | CP98.919_ | CP296.066 | CP177.102 | CP154.880 | CP284.889 |
| 3309.036  | 1527.442  | 180271.6  | 1732.528  | 9753.912  | 142471.8  | 2481.159  | 3405.555  | 107042.4  | 65553.62  |
| 6043.75   | 1244.952  | 151751.6  | 1787.88   | 13222.52  | 129106.5  | 4055.868  | 2926.439  | 99970.36  | 75047.81  |
| 3280.275  | 1567.873  | 121704.2  | 3239.078  | 13016.18  | 127397.2  | 0         | 3467.464  | 97580.89  | 59531.88  |
| 3256.346  | 1578.58   | 123752.8  | 2623.165  | 11278.53  | 133343.4  | 278.1632  | 3270.321  | 101774.2  | 52758.51  |
| 10201.53  | 1688.863  | 128037.1  | 3037.489  | 16736.05  | 122511    | 1471.395  | 3108.057  | 99851.76  | 57640.18  |



|           |           |           |           |           |           |           |           |           |           |
|-----------|-----------|-----------|-----------|-----------|-----------|-----------|-----------|-----------|-----------|
| CP96.922_ | CP86.0966 | CP125.071 | CP148.075 | CP156.877 | CP160.968 | CP464.722 | CP126.989 | CP146.117 | CP218.878 |
| 504025.4  | 12574.6   | 26984.4   | 4892.891  | 69431.14  | 24544.23  | 64548.71  | 29377.05  | 95867.04  | 454270.8  |
| 460377.6  | 10240.25  | 24866.05  | 4882.803  | 64820.58  | 25634.46  | 69120.59  | 29052.81  | 84986.54  | 397374.6  |
| 444796.4  | 11002.63  | 28799.48  | 5559.877  | 62286.41  | 26112.89  | 58205.45  | 33244.48  | 84284.27  | 363356.8  |
| 457400.6  | 10704.65  | 28896.39  | 5777.055  | 67797.74  | 27636.68  | 59637.04  | 30067.33  | 76367.74  | 355610    |
| 455192.2  | 13422.94  | 29296.98  | 7087.051  | 61584.46  | 30085.78  | 47798.16  | 33146.74  | 82601.05  | 381142.5  |

|           |           |           |           |           |           |           |           |           |           |
|-----------|-----------|-----------|-----------|-----------|-----------|-----------|-----------|-----------|-----------|
| CP137.026 | CP229.906 | CP378.776 | CP174.896 | CP147.113 | CP222.868 | CP262.859 | CP268.821 | CP274.792 | CP172.956 |
| 1836.481  | 248221.9  | 44839.32  | 117248.6  | 46436.74  | 108582    | 29305.7   | 60758.69  | 44177.94  | 1412790   |
| 3961.619  | 197009    | 49481.48  | 118057.9  | 47843.86  | 93419.47  | 303437.1  | 93515.18  | 43760.41  | 1181125   |
| 7046.932  | 319315.1  | 45016.26  | 122990.5  | 51008.65  | 93021     | 32684.58  | 73190.61  | 40140.35  | 1646493   |
| 6358.653  | 296451    | 44932.82  | 130284.6  | 47681.44  | 92574.14  | 33093.89  | 65244.95  | 43370.75  | 1636876   |
| 7424.577  | 297362.4  | 51189     | 146156.5  | 51806.7   | 83909.61  | 346143.5  | 114906.3  | 42066.09  | 1691768   |

|           |           |           |           |           |           |           |           |           |           |
|-----------|-----------|-----------|-----------|-----------|-----------|-----------|-----------|-----------|-----------|
| CP572.638 | CP136.061 | CP167.089 | CP88.1123 | CP270.797 | CP398.761 | CP266.776 | CP136.061 | CP143.997 | CP300.884 |
| 36875.34  | 11568.08  | 60620.64  | 188057.2  | 73175.42  | 75144.44  | 41408.59  | 13293.03  | 191168.2  | 186035.2  |
| 24245.63  | 10205.14  | 56765.62  | 175145.6  | 58774.47  | 57998.95  | 105997.1  | 10079.78  | 184531    | 181566.3  |
| 29591.7   | 10143.42  | 42416.68  | 194714.6  | 58784.19  | 62910.93  | 35835.3   | 11468.64  | 186190.2  | 122796.6  |
| 29727.12  | 10213.05  | 46035.01  | 192856.4  | 61240.14  | 59220.77  | 33897.81  | 10049.51  | 158327.6  | 117008.5  |
| 19627.18  | 11111.12  | 47086.49  | 203923.3  | 47899.84  | 47914.53  | 53331.52  | 11696.89  | 191794.2  | 184940.7  |

|           |           |           |           |           |           |           |           |           |           |
|-----------|-----------|-----------|-----------|-----------|-----------|-----------|-----------|-----------|-----------|
| CP316.836 | CP514.875 | CP137.045 | CP133.972 | CP102.535 | CP266.849 | CP336.802 | CP103.031 | CP417.847 | CP254.836 |
| 238787.4  | 7087.204  | 198123.1  | 9265.318  | 49273.67  | 132791.3  | 36562.7   | 8409.476  | 6499.033  | 517460.6  |
| 190162.1  | 7047.866  | 202251.9  | 12904.52  | 51621.95  | 89825.94  | 45230.07  | 8787.822  | 5639.204  | 350919.6  |
| 188553.2  | 9077.724  | 117989.6  | 5793.655  | 53774.66  | 88436.39  | 50426.45  | 14965.73  | 10016.81  | 382186.7  |
| 184745.6  | 11294.77  | 117576.5  | 3364.297  | 52440.7   | 84620.02  | 53534.35  | 16407.28  | 7601.647  | 388536.8  |
| 166364.6  | 11760.97  | 125211.8  | 6105.256  | 73043.46  | 102224.8  | 64531.3   | 9564.33   | 3630.353  | 290016.3  |

|           |           |           |           |           |           |           |           |           |           |
|-----------|-----------|-----------|-----------|-----------|-----------|-----------|-----------|-----------|-----------|
| CP86.0966 | CP102.034 | CP188.176 | CP312.943 | CP131.974 | CP122.547 | CP376.820 | CP316.824 | CP324.808 | CP326.805 |
| 7541.938  | 693437.6  | 16563.98  | 11425.9   | 97080.43  | 86721.04  | 6579.477  | 183336    | 107695.5  | 47062.56  |
| 5162.624  | 703229.8  | 8459.382  | 16987.89  | 103466.3  | 106858.4  | 8468.751  | 177360.5  | 76532.52  | 36026.7   |
| 7718.002  | 746134.7  | 6639.684  | 23078.08  | 108481.1  | 96330.4   | 4403.146  | 169129.4  | 85328.59  | 35952.03  |
| 6894.361  | 706028.9  | 8526.042  | 21887.2   | 112459.9  | 114024    | 6003.602  | 156515.4  | 80013.68  | 36606.37  |
| 6210.255  | 1006172   | 12900.44  | 16934.36  | 116541.6  | 122003    | 4916.549  | 151277.1  | 65844.14  | 36769.08  |

|           |           |           |           |           |           |           |           |           |           |
|-----------|-----------|-----------|-----------|-----------|-----------|-----------|-----------|-----------|-----------|
| CP141.066 | CP142.069 | CP142.122 | CP147.495 | CP171.005 | CP191.885 | CP322.811 | CP209.946 | CP91.9802 | CP168.016 |
| 81223.1   | 3063.126  | 4624.311  | 3791.591  | 4624.711  | 56682.22  | 84918.38  | 148631.7  | 49774.78  | 29892.53  |
| 66136.71  | 1937.964  | 3778.319  | 0         | 2218.731  | 74981.59  | 63527.53  | 154746.7  | 55264.08  | 31481.37  |
| 99980.65  | 3215.761  | 5979.459  | 10840.85  | 2305.716  | 75502.98  | 66679.58  | 211316.7  | 54540.31  | 32142.02  |
| 96239.2   | 3008.13   | 5589.474  | 6630.67   | 0         | 70607.91  | 61866.82  | 210013.1  | 57360.9   | 38273.18  |
| 93692.06  | 2637.357  | 5604.894  | 14786.7   | 2610.825  | 105423.5  | 53218.08  | 193723.6  | 64568.92  | 48830.01  |

|           |           |           |           |           |           |           |           |           |           |
|-----------|-----------|-----------|-----------|-----------|-----------|-----------|-----------|-----------|-----------|
| CP300.863 | CP220.167 | CP291.884 | CP141.091 | CP251.888 | CP135.063 | CP258.899 | CP105.52_ | CP331.284 | CP89.507_ |
| 200532.2  | 218903.2  | 19829.56  | 142286.6  | 128666.8  | 7673.532  | 154685.9  | 67554.34  | 119320.4  | 394638.4  |
| 199198.4  | 189943.7  | 26240.67  | 140509.1  | 158108.4  | 6653.065  | 187107    | 52800.68  | 118841.1  | 330549.6  |
| 176181.7  | 211858.8  | 18715.7   | 154903.7  | 177593.1  | 8440.448  | 199907.7  | 98630.66  | 116961.8  | 706287.8  |
| 168753.6  | 212255.3  | 18280.83  | 159121.4  | 170097.5  | 7796.052  | 192480.3  | 102615.1  | 120728.3  | 507905.4  |
| 189918.2  | 207598.9  | 23992.39  | 163135.8  | 223105.6  | 8153.142  | 155122.1  | 108948.9  | 105451.9  | 512833.5  |

|           |           |           |           |           |           |                 |
|-----------|-----------|-----------|-----------|-----------|-----------|-----------------|
| CP214.836 | CP154.036 | CP173.985 | CP244.190 | CP127.961 | CP181.086 | CP110.0202_4.27 |
| 77482.72  | 43824.57  | 194907.8  | 45417.57  | 77464.79  | 13001.91  | 3990524         |
| 68247.82  | 42651.38  | 134160    | 44271.24  | 63927.69  | 14347.41  | 2663397         |
| 61383.7   | 51969.34  | 237271.6  | 47660.29  | 27120.04  | 15739.02  | 2845754         |
| 64779.58  | 51938.21  | 237566.8  | 45471.79  | 20397.66  | 15807.64  | 2927590         |
| 54467.28  | 62700.38  | 246102.6  | 46545.62  | 33821.17  | 15719.51  | 3472848         |
