# Supplementary material for: Untargeted Multimodal Metabolomics Investigation of the Haemonchus contortus Exsheathment Secretome
Source: MDPI journal article supplement (doi:10.3390/cells11162525), 2022-08-15
Supplement: s1 [file s1]

| Treatment | LN203.935 | LN204.987 | LN204.989 | LN204.989 | LN204.989 | LN204.988 | LN204.989 | LN204.989 |
|-----------|-----------|-----------|-----------|-----------|-----------|-----------|-----------|-----------|
| PBS       | 62525.96  | 30141.19  | 27574.61  | 36083.12  | 45856.41  | 46562.09  | 34825.11  | 42790.6   |
| PBS       | 56011.09  | 34726.44  | 35698.06  | 37383.83  | 36969.86  | 35071.79  | 47848.97  | 45979.27  |
| PBS       | 43385.87  | 32156.5   | 30933.67  | 41358.33  | 42052.95  | 38775.78  | 48104.13  | 42172.72  |
| PBS       | 55059.45  | 32456.03  | 37404.16  | 49902.69  | 42607.84  | 41265.17  | 48877.51  | 47196.73  |
| PBS       | 39433.61  | 28333.3   | 34655.57  | 42917.21  | 42561.22  | 36965.21  | 54432.18  | 46479.37  |

|           |           |           |           |           |           |           |           |           |           |
|-----------|-----------|-----------|-----------|-----------|-----------|-----------|-----------|-----------|-----------|
| LN204.989 | LN204.989 | LN204.989 | LN204.989 | LN204.988 | LN204.989 | LN204.989 | LN204.989 | LN204.989 | LN204.988 |
| 41471.73  | 32319.96  | 44165.85  | 35765.33  | 23284.9   | 32382.88  | 29914.57  | 31225.51  | 27590.71  | 30050.27  |
| 32925.16  | 35221.32  | 28172.74  | 27357.42  | 22615.58  | 29502.1   | 26402.69  | 26392.96  | 29854.94  | 23699.39  |
| 32496.47  | 32836.39  | 28616.38  | 25378.09  | 19473.21  | 27855.14  | 28420.8   | 26483.08  | 31162.97  | 23942.28  |
| 32006.92  | 37075.36  | 29901.8   | 26303.08  | 23311.22  | 30224.14  | 26849.52  | 26604.4   | 28737.14  | 25093.56  |
| 31033.28  | 35762.38  | 30820.89  | 24684.91  | 22714.39  | 32015.78  | 27640.64  | 24736.76  | 33726.33  | 25418.79  |

|           |           |           |           |           |           |           |           |           |           |
|-----------|-----------|-----------|-----------|-----------|-----------|-----------|-----------|-----------|-----------|
| LN204.988 | LN205.839 | LN206.972 | LN206.972 | LN206.971 | LN206.972 | LN206.971 | LN206.972 | LN206.972 | LN206.972 |
| 49944.19  | 17327.86  | 449114.3  | 116261.3  | 111791.9  | 129325.2  | 189653.9  | 101437.3  | 144905.7  | 86128.94  |
| 49568.75  | 14941.86  | 319042.8  | 122073    | 121952.9  | 161503.2  | 143094.8  | 99616.97  | 171967.3  | 129029.8  |
| 43969.26  | 15435.52  | 357650.6  | 103455.1  | 161788.6  | 186668.7  | 115784.1  | 98605.25  | 135963.3  | 125481.9  |
| 46749.9   | 17376.06  | 368491.9  | 97244.51  | 98649.8   | 147213    | 130164.7  | 114654.2  | 160247.4  | 108463.1  |
| 48782.41  | 19612.02  | 464683.5  | 110024.5  | 136755.4  | 150363.3  | 117712.1  | 87889.38  | 166474.8  | 86086.32  |

|           |           |           |           |           |           |           |           |           |           |
|-----------|-----------|-----------|-----------|-----------|-----------|-----------|-----------|-----------|-----------|
| LN206.972 | LN206.972 | LN206.972 | LN206.971 | LN206.971 | LN206.972 | LN206.972 | LN206.972 | LN206.972 | LN206.972 |
| 128737.7  | 152985.4  | 109529.8  | 73538.08  | 54308.9   | 97608     | 158454.8  | 174403.6  | 131744.1  | 109541.3  |
| 167074.8  | 178445.8  | 108270.8  | 75755.02  | 89065.67  | 148772.1  | 104662.3  | 130661.7  | 137456.3  | 121833.5  |
| 149944.2  | 174491.8  | 120617.3  | 68845.85  | 44781.92  | 154460    | 168072.4  | 167598.1  | 129746.6  | 144294.1  |
| 147280.7  | 170962.5  | 90064.31  | 68407.14  | 71678.59  | 133217.1  | 117293.7  | 199180    | 141291.9  | 174390.5  |
| 137392.1  | 170165.5  | 108910.7  | 72277.19  | 61452.35  | 134231    | 119008.8  | 166487.1  | 133407.1  | 145493    |

|           |           |           |           |           |           |           |           |           |           |
|-----------|-----------|-----------|-----------|-----------|-----------|-----------|-----------|-----------|-----------|
| LN206.972 | LN206.972 | LN206.971 | LN206.972 |
| 149372    | 98020.65  | 96927.31  | 105606.4  | 76848.77  | 116743.2  | 120302    | 150914.3  | 100020.5  | 172298.9  |
| 132482.7  | 125904.4  | 84211.35  | 100237.7  | 86822.87  | 113410.9  | 161805.4  | 111521    | 69953.75  | 141171.8  |
| 133570.6  | 109794.4  | 94325     | 128210.1  | 158158.8  | 122951.3  | 95318.05  | 142015.4  | 119116.2  | 179492.6  |
| 90819.04  | 88122.5   | 61597.2   | 102812.8  | 103536.9  | 173459.9  | 118762    | 102936.1  | 81829.66  | 205543.1  |
| 126656.6  | 124270.7  | 111364.6  | 108662.9  | 89307.14  | 110963.8  | 133287.3  | 107783.6  | 98034.41  | 243366.3  |

|           |           |           |           |           |           |           |           |           |           |
|-----------|-----------|-----------|-----------|-----------|-----------|-----------|-----------|-----------|-----------|
| LN206.972 |
| 113037.1  | 126862.3  | 168358.6  | 150952.6  | 94200.91  | 190435.3  | 126531.4  | 126591.6  | 110519.7  | 131702.1  |
| 98481.18  | 91530.53  | 186785.7  | 180152.9  | 113979.4  | 188579.2  | 152346.8  | 135800.7  | 120642.3  | 137122.1  |
| 149975.9  | 110594.4  | 245304.6  | 133986.9  | 84267.91  | 174986.2  | 112483.8  | 173085.8  | 107711.3  | 144483.6  |
| 96619.48  | 108864.4  | 130592.4  | 122473.6  | 99676.2   | 164293.2  | 109585.8  | 157718.7  | 116865.7  | 117750.8  |
| 112396.6  | 149158.5  | 142645    | 123597.3  | 109027.3  | 177590    | 164420.2  | 128945.3  | 132468.9  | 88463.33  |

|           |           |           |           |           |           |           |           |           |           |
|-----------|-----------|-----------|-----------|-----------|-----------|-----------|-----------|-----------|-----------|
| LN206.971 | LN206.972 |
| 77068.51  | 96065.64  | 133079.3  | 136056.4  | 244297.3  | 105777.2  | 129007.9  | 120335.2  | 123207.4  | 148664.4  |
| 59804.03  | 134241.3  | 102479.6  | 153103.3  | 250944.5  | 134666.4  | 101794.6  | 119511.6  | 97189.82  | 99721.55  |
| 72420.69  | 108288.1  | 147255.6  | 164303.9  | 187710    | 118144.7  | 121034.4  | 128912.8  | 141673.3  | 144140    |
| 78773.44  | 119488.1  | 115874.1  | 104194.9  | 189218.7  | 182842.3  | 180887.9  | 120122.9  | 147408.1  | 133872.8  |
| 77320.09  | 135853.3  | 94622.93  | 171697.1  | 221083.1  | 85655.87  | 134327.9  | 133674.8  | 115103.6  | 103326.7  |

|           |           |           |           |           |           |           |           |           |           |
|-----------|-----------|-----------|-----------|-----------|-----------|-----------|-----------|-----------|-----------|
| LN206.972 |
| 171627.7  | 133529.7  | 177640.6  | 188276.8  | 106451.6  | 86413.91  | 119924.6  | 127725.3  | 115103.3  | 95149     |
| 151144    | 166981.1  | 139304.7  | 119465.6  | 121800.4  | 115129.6  | 90641.95  | 122163.2  | 139361.1  | 102086.5  |
| 120034.6  | 118869.4  | 117208.7  | 157200.6  | 154556.9  | 103659.1  | 130056    | 134197    | 210879.3  | 105869.9  |
| 98927.94  | 94922.36  | 81861.86  | 205327.1  | 132489.9  | 154671.2  | 107928.9  | 123282.5  | 117754.3  | 115474.5  |
| 108386.3  | 121314.8  | 129959.3  | 126518.4  | 106165.9  | 111491.7  | 110545.5  | 121918.4  | 108242.3  | 106600.6  |



|           |           |           |           |           |           |           |           |           |           |
|-----------|-----------|-----------|-----------|-----------|-----------|-----------|-----------|-----------|-----------|
| LN206.971 | LN206.972 | LN206.971 | LN206.972 |
| 66916.01  | 107459.2  | 168626.5  | 103444.9  | 149679    | 91527.68  | 142875.5  | 143790.2  | 43114.05  | 108797    |
| 48302.87  | 201477.8  | 115374.7  | 94930.22  | 198190.8  | 102838.3  | 198392    | 146838.4  | 45660.1   | 108313.5  |
| 61475.35  | 154781.8  | 114609.1  | 104547.8  | 130053.3  | 117909.6  | 152161.2  | 162888.8  | 51265.56  | 184758.2  |
| 69629.73  | 138821.1  | 166654.1  | 83083.08  | 125404.7  | 138711.9  | 133239.2  | 157522.8  | 45990.81  | 107303    |
| 61789.23  | 169427.9  | 122516.8  | 104288.3  | 135906.1  | 96095.79  | 175492.5  | 201069.4  | 60771.49  | 135033.5  |

|           |           |           |           |           |           |           |           |           |           |
|-----------|-----------|-----------|-----------|-----------|-----------|-----------|-----------|-----------|-----------|
| LN206.972 |
| 131696.8  | 188698    | 237482    | 110194.1  | 87591.05  | 79126.88  | 158536.8  | 134425.9  | 133343.1  | 157629.8  |
| 155334.4  | 224918.8  | 169744.7  | 156386.6  | 109967.2  | 131400.9  | 99217.28  | 182502.2  | 140704.1  | 106759.1  |
| 112068.7  | 140096.3  | 177369.7  | 149589.1  | 119075.4  | 153941.4  | 113983.9  | 195723.3  | 170570.1  | 100116.8  |
| 133504    | 110142.6  | 123357    | 149796.7  | 110164.7  | 101739.3  | 109607.7  | 168683.6  | 186937.4  | 111046.3  |
| 137152.1  | 204792.8  | 144864    | 144998.6  | 112359.9  | 108217.8  | 116545.3  | 153073.5  | 98382.96  | 117779.4  |

|           |           |           |           |           |           |           |           |           |           |
|-----------|-----------|-----------|-----------|-----------|-----------|-----------|-----------|-----------|-----------|
| LN206.972 | LN206.972 | LN206.971 | LN206.972 | LN206.972 | LN206.972 | LN206.972 | LN206.972 | LN206.972 | LN207.836 |
| 74451.59  | 143191.9  | 51997.89  | 124683.5  | 97143.53  | 97138.82  | 153324.7  | 214125.1  | 158018.4  | 23801.85  |
| 98640.49  | 139733    | 71544.53  | 100107.7  | 150759.4  | 123689.8  | 151642.9  | 182621.5  | 224152.5  | 20344.24  |
| 128773.6  | 172610.4  | 79051.39  | 146217.8  | 135703.6  | 90901.36  | 155805.7  | 205963    | 204899.4  | 21100.32  |
| 139307    | 141058.6  | 54683     | 133848.8  | 149660.7  | 104283.4  | 134430.3  | 225642    | 160257    | 21045.77  |
| 113629.4  | 105311.7  | 56147.67  | 157938.6  | 142812.6  | 78809.52  | 186939.8  | 150803.6  | 169323.1  | 28307.92  |

|           |           |           |           |           |           |           |           |           |           |
|-----------|-----------|-----------|-----------|-----------|-----------|-----------|-----------|-----------|-----------|
| LN207.917 | LN207.930 | LN207.930 | LN207.930 | LN207.930 | LN207.975 | LN209.926 | LN210.883 | LN210.948 | LN212.881 |
| 147220.3  | 25663.62  | 20527.72  | 26516.52  | 21061.12  | 13255.27  | 30755.71  | 31990.78  | 25576.9   | 22261.64  |
| 124310.6  | 23836.62  | 20543.94  | 23076.01  | 22473.68  | 11432.3   | 31523.73  | 31151.93  | 24646.37  | 17699.71  |
| 150016.8  | 26331.12  | 19399.32  | 23406.13  | 22291.2   | 13250.58  | 31995.3   | 32674.78  | 22634.59  | 19772.69  |
| 148135.2  | 25782.75  | 18158.41  | 23444.53  | 20947.85  | 13269.13  | 36676.62  | 30842.49  | 23573.32  | 18586.99  |
| 166776.5  | 27582.29  | 18233.72  | 26131.01  | 19924.85  | 13209.07  | 38475.39  | 35454.81  | 24091.94  | 20797.3   |

|           |           |           |           |           |           |           |           |           |           |
|-----------|-----------|-----------|-----------|-----------|-----------|-----------|-----------|-----------|-----------|
| LN212.910 | LN212.978 | LN213.014 | LN213.055 | LN214.879 | LN215.007 | LN215.007 | LN215.007 | LN215.009 | LN215.009 |
| 18996.53  | 12392.76  | 23876.94  | 15505.31  | 16331.8   | 305823.6  | 243643.2  | 235612.8  | 302378.9  | 177521.9  |
| 19651.29  | 13387.27  | 23354.38  | 13052.56  | 14126.1   | 286013    | 239929.4  | 229868.3  | 209404.3  | 181104.7  |
| 19291.76  | 15817.88  | 25120.56  | 11105.68  | 15440.97  | 298022    | 250691.6  | 227973.5  | 191132.8  | 166181.2  |
| 21979.57  | 14397.77  | 23369.9   | 14799.42  | 16107.8   | 304896.3  | 245690.4  | 220098.3  | 182987.3  | 231134.6  |
| 23083.98  | 12414.32  | 24044.32  | 12371.81  | 19798.24  | 295148    | 253831.8  | 226588.9  | 233432.2  | 164556.3  |

|           |           |           |           |           |           |           |           |           |           |
|-----------|-----------|-----------|-----------|-----------|-----------|-----------|-----------|-----------|-----------|
| LN215.009 |
| 176111.5  | 137033.4  | 231372.4  | 168125.5  | 173745.5  | 186303.5  | 149264.3  | 134730.2  | 272912.8  | 175459.7  |
| 261316.9  | 115634.1  | 273887.5  | 271029.5  | 234109.8  | 219595.5  | 209876.6  | 164132.3  | 293117.1  | 176276.7  |
| 249450.1  | 139443.5  | 170999    | 140230.8  | 200921.6  | 381939    | 135719.2  | 191662.9  | 219500.6  | 169919.8  |
| 192850.3  | 118524    | 179848    | 176130.6  | 158987.2  | 295829.7  | 140593.9  | 132758.9  | 192340.6  | 203177.5  |
| 165568.4  | 116330.8  | 197938.7  | 209820.6  | 164817    | 185013.8  | 184920.9  | 266331.4  | 258524.9  | 211730.5  |

|           |           |           |           |           |           |           |           |           |           |
|-----------|-----------|-----------|-----------|-----------|-----------|-----------|-----------|-----------|-----------|
| LN215.009 |
| 254466    | 213256.4  | 173146.8  | 181746.4  | 168998.6  | 199777.9  | 210388.6  | 189779.4  | 257217    | 248110    |
| 245354.5  | 205046.8  | 205186.6  | 274234.6  | 183026.7  | 209361.8  | 230169.5  | 176264.8  | 216002    | 235633.1  |
| 169016.8  | 229650.2  | 234048    | 256730.9  | 185068.7  | 210826.6  | 305551    | 191588.1  | 225961    | 331545.1  |
| 297590.8  | 196691.4  | 166360.6  | 187888.2  | 166554.4  | 190674.6  | 238115.6  | 212915.8  | 234970.3  | 225357.8  |
| 247066    | 218517.4  | 200958.6  | 263907.6  | 197186.4  | 217013.5  | 165014.6  | 185174.7  | 195684.4  | 272138.8  |

|           |           |           |           |           |           |           |           |           |           |
|-----------|-----------|-----------|-----------|-----------|-----------|-----------|-----------|-----------|-----------|
| LN215.009 |
| 201395.5  | 276899.1  | 241191.6  | 133091.8  | 176278.7  | 144698.4  | 165564    | 206698.2  | 230663.5  | 145905.9  |
| 217956.5  | 353423.6  | 193193.1  | 187973.6  | 146556.6  | 146671.3  | 188989.2  | 257047.9  | 234177.4  | 161546.8  |
| 203494    | 177923.1  | 212621.5  | 126522.9  | 148228.1  | 206388.1  | 118086.1  | 310164.1  | 227007.8  | 205160    |
| 210391.9  | 206868.1  | 338959.8  | 197362.8  | 183685.9  | 205628.7  | 136985.9  | 244867.4  | 269362.6  | 129310.9  |
| 212504.2  | 170397.8  | 233895.8  | 163257.1  | 154014.4  | 190695.7  | 171804.4  | 277639.7  | 201447.3  | 181193.3  |



|           |           |           |           |           |           |           |           |           |           |
|-----------|-----------|-----------|-----------|-----------|-----------|-----------|-----------|-----------|-----------|
| LN215.009 |
| 197250.5  | 156816.4  | 172697    | 179535.7  | 179154.6  | 294865.2  | 138907.4  | 209860.8  | 163925.1  | 233893.5  |
| 339682.3  | 153964.9  | 182028.7  | 227764.5  | 175545.3  | 244215.6  | 113548.7  | 164568.5  | 191464.7  | 200297.2  |
| 282456.8  | 146908.5  | 163316.6  | 210237.9  | 265038.5  | 315952.9  | 119426.4  | 196258.4  | 148119.3  | 123175.1  |
| 231355.7  | 167438    | 154184.1  | 256053.1  | 180191.9  | 247915.3  | 116394.9  | 139759.4  | 154544.4  | 139534.1  |
| 322582.3  | 181942    | 168767.1  | 239033.5  | 253594.4  | 229262.5  | 147032.1  | 158135.1  | 167779.1  | 140735.7  |

|           |           |           |           |           |           |           |           |           |           |
|-----------|-----------|-----------|-----------|-----------|-----------|-----------|-----------|-----------|-----------|
| LN215.009 |
| 115417.4  | 136771.8  | 151160.3  | 204388.4  | 182880    | 134557.5  | 242458.1  | 143934.7  | 219673.5  | 227191.6  |
| 186109.1  | 143111.3  | 174865.9  | 142552.3  | 324064.1  | 140425.6  | 251569.6  | 141532.2  | 262104.5  | 140904.8  |
| 159693.7  | 119688    | 203394.1  | 174472.4  | 273966.1  | 137855.8  | 225995.2  | 110146.2  | 227389.1  | 176856.2  |
| 104085.8  | 135702.9  | 129020.3  | 210281.6  | 239790.6  | 128483.5  | 232345.3  | 138246.5  | 158987.3  | 153231.1  |
| 134534.8  | 154212.3  | 132675.8  | 207302.6  | 238201.8  | 149191.3  | 202536.6  | 131039.2  | 375509.7  | 215674.9  |

|           |           |           |           |           |           |           |           |           |           |
|-----------|-----------|-----------|-----------|-----------|-----------|-----------|-----------|-----------|-----------|
| LN215.009 |
| 186347    | 135315.4  | 262373.8  | 189424    | 161772.1  | 283235.8  | 302225.6  | 235566.3  | 110381    | 208641.3  |
| 136047.5  | 140798.5  | 306185.8  | 228402.7  | 170659.2  | 204230.2  | 196301.4  | 273744.4  | 138957.5  | 224271.8  |
| 127979.4  | 171901.2  | 203728.4  | 176183    | 180746.1  | 282677.1  | 227852.8  | 169567.9  | 133531.2  | 245396.7  |
| 131274    | 161881.4  | 249645.4  | 249358.6  | 206096.2  | 169441    | 254552.3  | 182634.3  | 97245.08  | 188249.9  |
| 111003.1  | 116301.3  | 225262.5  | 139957.6  | 134341.3  | 162311.6  | 278980    | 208374.2  | 129272    | 221672.2  |

|           |           |           |           |           |           |           |           |           |           |
|-----------|-----------|-----------|-----------|-----------|-----------|-----------|-----------|-----------|-----------|
| LN215.009 |
| 213036.9  | 303690.6  | 135370.7  | 199399.9  | 179268.6  | 198113.7  | 166314.8  | 144921.9  | 294835.2  | 201994.9  |
| 229463.7  | 243727.2  | 206642.1  | 217589.4  | 172781    | 156704    | 209013.1  | 137474.3  | 292208.2  | 203323.4  |
| 201847.6  | 231303.6  | 179651.4  | 226007.5  | 158446.8  | 153102.9  | 185395.6  | 165625.3  | 227079.7  | 239768.3  |
| 239711.1  | 202854.8  | 194098.8  | 214052.5  | 216651.7  | 206189.2  | 184695.6  | 180947.8  | 185611.8  | 165039.3  |
| 168556.9  | 222801.8  | 123614.5  | 202231.9  | 270579.2  | 153265.9  | 172449.6  | 158645.4  | 194467.6  | 248252.7  |

|           |           |           |           |           |           |           |           |           |           |
|-----------|-----------|-----------|-----------|-----------|-----------|-----------|-----------|-----------|-----------|
| LN215.009 |
| 235135.1  | 382010.4  | 221434.6  | 182335.5  | 185346.5  | 207835.6  | 221135.4  | 203239.6  | 160188.4  | 158845.5  |
| 220214.3  | 174803    | 156578.3  | 182351.1  | 214324.8  | 211549.3  | 174608.7  | 248794.6  | 257158.7  | 135628.9  |
| 158669.4  | 258452.6  | 214137.9  | 159301    | 147678.1  | 202021.9  | 225894.1  | 253813.6  | 195007.1  | 127070.8  |
| 192369.7  | 233958    | 143080.5  | 170276.4  | 164495.4  | 162113.1  | 231154.4  | 245178.4  | 185350.6  | 127650.1  |
| 214644.6  | 205188.7  | 165687.2  | 186335.8  | 204654.6  | 219146.1  | 188926    | 198188    | 199555.1  | 115416.6  |

|           |           |           |           |           |           |           |           |           |           |           |
|-----------|-----------|-----------|-----------|-----------|-----------|-----------|-----------|-----------|-----------|-----------|
| LN215.009 | LN215.867 | LN215.992 | LN215.992 | LN215.992 | LN215.992 | LN215.992 | LN215.992 | LN215.993 | LN215.993 | LN215.993 |
| 239770    | 137056.2  | 47875.82  | 68538.45  | 61893.04  | 49209.4   | 50305.67  | 55178.09  | 70769.19  | 89291.19  |           |
| 152610.4  | 122127.6  | 49746.43  | 79003.25  | 60851.31  | 50676.96  | 38096.18  | 70628.56  | 36890.67  | 64113.67  |           |
| 163784.6  | 126484    | 50662.27  | 70941.85  | 54982.8   | 45994.68  | 33839.96  | 54746.77  | 50774.24  | 76996.82  |           |
| 237975.5  | 111075.6  | 46077.19  | 72429.41  | 55235.76  | 47933.97  | 36753.5   | 85575.62  | 59417.11  | 98291.32  |           |
| 220061.6  | 160796.3  | 48805.16  | 68574.89  | 53874.33  | 49359.68  | 36146.99  | 72746.19  | 40937.71  | 89086.99  |           |

|           |           |           |           |           |           |           |           |           |           |
|-----------|-----------|-----------|-----------|-----------|-----------|-----------|-----------|-----------|-----------|
| LN215.993 | LN215.992 | LN215.993 | LN215.993 |
| 87079.5   | 47922.8   | 60475.05  | 63678.9   | 40882.29  | 54483.16  | 68103.04  | 70094.94  | 61092.93  | 70231.34  |
| 94621.53  | 58085.06  | 54621.71  | 53541.52  | 53860.13  | 78327.72  | 54994.74  | 75375.18  | 68678.85  | 62440.71  |
| 74311.25  | 66848.58  | 109232.1  | 66284.63  | 38761.61  | 77598.28  | 70889.3   | 59827.24  | 85881.51  | 71911.15  |
| 65479.54  | 55357.02  | 93987.82  | 65835.03  | 42900.53  | 90006.71  | 67068.9   | 86889.13  | 55165.66  | 72127.14  |
| 96894.02  | 90076.45  | 87646.09  | 54170.18  | 42246.89  | 41476.14  | 55035.39  | 106216.9  | 54489.06  | 71720.36  |

|           |           |           |           |           |           |           |           |           |           |
|-----------|-----------|-----------|-----------|-----------|-----------|-----------|-----------|-----------|-----------|
| LN215.993 | LN215.992 | LN215.993 |
| 76812.65  | 76097.45  | 57855.64  | 91587.12  | 65336.13  | 69212.43  | 49273.08  | 51545.47  | 43335.78  | 94570.33  |
| 64265.62  | 79930.52  | 52145.17  | 74338.47  | 74825.45  | 49197.73  | 72000.77  | 52196.17  | 58479.33  | 70094.34  |
| 77156.15  | 54533.82  | 43071.55  | 80334.72  | 69158.81  | 71953.27  | 70325.63  | 66380.24  | 59950.75  | 63177.99  |
| 61716.87  | 80477.63  | 90079.64  | 49330.65  | 63432.42  | 93508.97  | 87761.79  | 39413.09  | 63882.54  | 107310.8  |
| 78378.42  | 87416.07  | 68298.81  | 70307.48  | 64041.37  | 79284.88  | 56122.22  | 43631.9   | 40728.35  | 62806.46  |



|           |           |           |           |           |           |           |           |           |           |
|-----------|-----------|-----------|-----------|-----------|-----------|-----------|-----------|-----------|-----------|
| LN215.993 |
| 101464.7  | 45880.73  | 58243.93  | 103841.2  | 38473.49  | 55295.39  | 97703.48  | 72745.06  | 53246.28  | 72968.04  |
| 77596.8   | 61093.91  | 77208.78  | 59416.62  | 39981.25  | 64672.22  | 55682.3   | 85616.46  | 51800.5   | 80027.64  |
| 91345.02  | 50957.94  | 60109.2   | 88066.19  | 53160.98  | 62150.68  | 63187.17  | 75512.48  | 55799.84  | 59303.33  |
| 65644.45  | 60608.09  | 40157.97  | 77909.3   | 43944.3   | 61539.98  | 52466.32  | 71634.88  | 54177.47  | 71632.61  |
| 107577.6  | 78832.75  | 74198.45  | 75444.88  | 39037.03  | 56583     | 68410.22  | 82015.8   | 64759.41  | 69540.96  |

|           |           |           |           |           |           |           |           |           |           |
|-----------|-----------|-----------|-----------|-----------|-----------|-----------|-----------|-----------|-----------|
| LN215.993 |
| 53207.15  | 51842.48  | 55634.63  | 38483.05  | 67424.62  | 73455.99  | 60171.11  | 103365.9  | 86107.96  | 54780.1   |
| 71185.51  | 58028.07  | 46423.98  | 45295.67  | 59126.46  | 72177.56  | 53682.85  | 50094.34  | 85966.29  | 56932.43  |
| 62788.52  | 66185.41  | 38652.93  | 47455.73  | 82199.3   | 69866.21  | 43508.5   | 50748.44  | 53906.01  | 49624.62  |
| 54120.33  | 78824.38  | 46705.17  | 48355.66  | 54110.78  | 75652     | 55970.64  | 59377.65  | 44072.66  | 45292.64  |
| 53699.79  | 52857.04  | 46299.62  | 44337.71  | 100018    | 73755.59  | 51786.54  | 46670.61  | 78353.97  | 48470.29  |

|           |           |           |           |           |           |           |           |           |           |
|-----------|-----------|-----------|-----------|-----------|-----------|-----------|-----------|-----------|-----------|
| LN215.993 |
| 48267.86  | 59251.58  | 46178.6   | 48106.33  | 58362.47  | 66645.48  | 44401.68  | 63937.84  | 40174.74  | 87876.19  |
| 69548.31  | 44171.93  | 45953.33  | 41942.78  | 64573.57  | 99879.9   | 54076.99  | 54163.54  | 77853.35  | 73591.71  |
| 46409.96  | 50174.78  | 41584.7   | 52870.5   | 49597.31  | 63021.49  | 52768.29  | 101561.7  | 81514.08  | 86352.96  |
| 61216.72  | 63852.7   | 52997.71  | 47050.68  | 74469.22  | 87783.25  | 50347.75  | 61093.91  | 51753     | 70614.11  |
| 54693.07  | 41947.85  | 46179.36  | 58097.23  | 53525.63  | 76119.35  | 44909.83  | 59207.5   | 66447.93  | 67865.24  |

|           |           |           |           |           |           |           |           |           |           |
|-----------|-----------|-----------|-----------|-----------|-----------|-----------|-----------|-----------|-----------|
| LN215.993 |
| 84401.8   | 39900.7   | 60187.6   | 42663.26  | 45576.67  | 70962.64  | 42332.98  | 45286.35  | 77352.97  | 58727.29  |
| 72569.97  | 48500.29  | 48339.28  | 45622.3   | 40605.41  | 66725.29  | 61955.35  | 40626.95  | 60754.3   | 66392.48  |
| 89388.42  | 54220.19  | 58106.5   | 32912.49  | 65854.67  | 66085.76  | 31955.77  | 46040.27  | 55660.61  | 54072.89  |
| 91581.64  | 29498.54  | 69317.08  | 55211.78  | 81279.51  | 51541.77  | 57138.22  | 50965.3   | 66346.21  | 55514.26  |
| 80339.55  | 57183.41  | 58135.3   | 38890.85  | 53768.65  | 67713.03  | 47201.82  | 45729.46  | 56781.64  | 93151.83  |

|           |           |           |           |           |           |           |           |           |           |
|-----------|-----------|-----------|-----------|-----------|-----------|-----------|-----------|-----------|-----------|
| LN215.993 |
| 59923.3   | 57692.56  | 41189.42  | 85612.2   | 68467.27  | 62450.99  | 79618.26  | 56198.37  | 59359.97  | 60486.45  |
| 83730.71  | 69388.31  | 50160.33  | 76783.43  | 93768.94  | 62105.47  | 76412.44  | 57397.18  | 49486.83  | 66923.86  |
| 53196.52  | 43198.25  | 47563.11  | 69898.6   | 65862.12  | 81597.88  | 80766.86  | 69269.32  | 40192.35  | 75459.66  |
| 53513.42  | 71179.08  | 60761.52  | 97941.11  | 89799.37  | 55555.61  | 66984.18  | 48417.26  | 37624.21  | 49849.79  |
| 53159.54  | 49045.33  | 39307.01  | 92526.06  | 73065.92  | 64190.58  | 67806.73  | 56528.81  | 62232.22  | 63481.98  |

|           |           |           |           |           |           |           |           |           |           |           |
|-----------|-----------|-----------|-----------|-----------|-----------|-----------|-----------|-----------|-----------|-----------|
| LN215.993 | LN216.012 | LN216.012 |
| 42825.63  | 54638.97  | 116502.8  | 38829.98  | 89523.8   | 77022.09  | 40572.05  | 65380.64  | 62732.3   | 58777.45  |           |
| 48697.79  | 81083.04  | 76024.84  | 39089.28  | 87111.86  | 54516.71  | 45552.97  | 53868.26  | 61797.07  | 53843.21  |           |
| 47867.18  | 78337.86  | 61769.78  | 64365.65  | 93795.53  | 50449.13  | 32557.08  | 95813.07  | 64411.3   | 53186.62  |           |
| 41776.72  | 84349.68  | 81662.91  | 36211.06  | 60162.55  | 59288.52  | 40460.9   | 60361.67  | 63095.95  | 51996.24  |           |
| 59444.99  | 78113.24  | 61024.87  | 55389.4   | 54606.59  | 54099.01  | 46683.14  | 78006.61  | 59385.57  | 52910.12  |           |

|           |           |           |           |           |           |           |           |           |           |
|-----------|-----------|-----------|-----------|-----------|-----------|-----------|-----------|-----------|-----------|
| LN216.012 |
| 57675.79  | 64724.59  | 44037.41  | 44984.05  | 20237.08  | 50928.56  | 64744.32  | 28506     | 40171.7   | 14707.59  |
| 60950.93  | 71747.24  | 48226.17  | 47636.97  | 58943.03  | 49043.46  | 61787.29  | 32241.25  | 42596.82  | 45333.51  |
| 56421.31  | 65916.67  | 41136.97  | 48739.2   | 56927.48  | 52944.2   | 61050.72  | 30694.55  | 43718.07  | 40489.16  |
| 54383.73  | 73387.58  | 43985.56  | 50350.65  | 53256.85  | 46457.79  | 65370.49  | 29148.46  | 33205.95  | 42331.58  |
| 59638.42  | 71131.13  | 40091.3   | 48070.64  | 58757.97  | 47731.49  | 62668.6   | 31977.77  | 38154.8   | 41528.74  |

|           |           |           |           |           |           |           |           |           |           |
|-----------|-----------|-----------|-----------|-----------|-----------|-----------|-----------|-----------|-----------|
| LN216.010 | LN216.012 | LN216.011 | LN216.012 |
| 66851.23  | 56732.7   | 36899     | 43283.44  | 68301.2   | 35401.32  | 15441.43  | 15302.74  | 61608.08  | 49075.64  |
| 71250.61  | 56365.04  | 35211.29  | 47136.21  | 68387.76  | 33247.22  | 44054.88  | 45838.82  | 54881.38  | 48955.07  |
| 71189.77  | 60959.54  | 34317.1   | 52323.51  | 74285.58  | 31183.84  | 39771.23  | 40471.12  | 53509.02  | 48310.03  |
| 66246.64  | 55172.6   | 31654.02  | 51365.21  | 68680.18  | 32887.08  | 43509.99  | 41125.25  | 53098.98  | 49579.73  |
| 65377.23  | 58683.73  | 32843.69  | 50971.85  | 68149.89  | 34381.08  | 41391.81  | 41502.45  | 52686.44  | 45499.63  |



|           |           |           |           |           |           |           |           |           |           |
|-----------|-----------|-----------|-----------|-----------|-----------|-----------|-----------|-----------|-----------|
| LN216.013 | LN216.013 | LN216.013 | LN216.853 | LN217.863 | LN218.987 | LN218.987 | LN218.987 | LN218.987 | LN218.987 |
| 67249.08  | 57279.08  | 44273.96  | 45738.84  | 100890.6  | 28090.84  | 20630.92  | 24815.39  | 31436.42  | 22868.46  |
| 72279.07  | 61117.95  | 45028.06  | 40444.89  | 80502.9   | 27483.72  | 18482.19  | 25628.19  | 31087.1   | 23132.13  |
| 70200.4   | 61961.75  | 45635.35  | 41374.29  | 83692.84  | 29628.95  | 22295.5   | 27527.17  | 32643.49  | 22479.04  |
| 62115.85  | 61617.36  | 45175.77  | 44029.58  | 97970.4   | 24063.51  | 20808.63  | 26674.56  | 34079.92  | 21835.28  |
| 67798.18  | 59779.86  | 48943.66  | 61029.73  | 101629.9  | 29502.5   | 20745     | 23774.68  | 35413.51  | 22718.63  |

|           |           |           |           |           |           |           |           |           |           |
|-----------|-----------|-----------|-----------|-----------|-----------|-----------|-----------|-----------|-----------|
| LN218.987 |
| 19661.5   | 19707.75  | 19816.41  | 24149.8   | 25082.8   | 23613.21  | 18977.51  | 38663.82  | 18770.88  | 45227.26  |
| 20149.86  | 18607.94  | 22402.51  | 25379.6   | 23166.49  | 25019.23  | 22643.63  | 36649.64  | 16294.94  | 44083.29  |
| 21660.46  | 21083.69  | 18432.71  | 22106.54  | 26182.34  | 25274.39  | 19743.26  | 38220.86  | 17070.09  | 40932.66  |
| 22611.02  | 21968.73  | 19671.96  | 22885.86  | 26831.76  | 24446.24  | 21018.79  | 39124.9   | 16873.29  | 46505.74  |
| 22903.72  | 22448.74  | 20269.82  | 21637.93  | 25579.94  | 25516.81  | 22226.69  | 40858.66  | 19493.6   | 41521.03  |

|           |           |           |           |           |           |           |           |           |           |
|-----------|-----------|-----------|-----------|-----------|-----------|-----------|-----------|-----------|-----------|
| LN218.988 | LN218.988 | LN218.988 | LN218.988 | LN218.988 | LN218.987 | LN218.988 | LN218.988 | LN218.988 | LN218.988 |
| 53106.42  | 63844.38  | 43917.55  | 60187.7   | 45244.06  | 43932.91  | 47638.42  | 81669.88  | 44129.38  | 56060.06  |
| 76599.93  | 66095.68  | 44253.18  | 53400.14  | 48178.89  | 43869.33  | 41418.15  | 71709.76  | 32796.5   | 54712.67  |
| 41946.5   | 49980.66  | 48594.53  | 38968.99  | 48823.06  | 41770.42  | 31625.8   | 61346.1   | 40867.49  | 45981.98  |
| 51012.84  | 54214.38  | 44919.31  | 62273.85  | 44764.94  | 33970.2   | 33641.11  | 66847.18  | 47314.45  | 57455.4   |
| 81254.31  | 58976.6   | 40398.7   | 72166.22  | 40016.2   | 38010.38  | 36278.5   | 39237.7   | 42130.52  | 64552.53  |

|           |           |           |           |           |           |           |           |           |           |
|-----------|-----------|-----------|-----------|-----------|-----------|-----------|-----------|-----------|-----------|
| LN218.988 |
| 36164.41  | 59406.16  | 54565.39  | 44126.86  | 45780.06  | 67300.3   | 36301.56  | 16721.18  | 30849.63  | 24808.7   |
| 30125.79  | 36207.62  | 66224.37  | 41515.6   | 42581.81  | 61452.84  | 57544.8   | 16623.35  | 26522.71  | 20785.05  |
| 25143.98  | 41558.28  | 52254.32  | 37386.6   | 53160.13  | 54267.04  | 51015.12  | 20584.12  | 32287.67  | 24135.79  |
| 23409.35  | 42912.12  | 46796.51  | 39156.36  | 58202.01  | 50731.61  | 49822.66  | 20961.14  | 29331.21  | 23444.64  |
| 22599.99  | 41668.64  | 51498.66  | 39046.28  | 56037.26  | 47980.3   | 49990.37  | 23853.62  | 30245.55  | 26222.87  |

|           |           |           |           |           |           |           |           |           |           |
|-----------|-----------|-----------|-----------|-----------|-----------|-----------|-----------|-----------|-----------|
| LN218.988 |
| 49227.8   | 51270.45  | 22836.07  | 27858.88  | 23162.96  | 44330.32  | 32587.21  | 38588.87  | 17449.79  | 38155.28  |
| 33235.07  | 43114.14  | 28126.37  | 19854.47  | 39173.99  | 45024.35  | 25887.34  | 33366.09  | 28497.41  | 32805.21  |
| 37325.42  | 32253.7   | 20552.14  | 21923.69  | 33314.53  | 46097.73  | 25705.41  | 30648.83  | 20382.86  | 37526.36  |
| 37352.16  | 30627.61  | 20442.2   | 22285.58  | 31390.1   | 38496.38  | 24787.11  | 27737.09  | 21891.71  | 33676.84  |
| 42073.96  | 31788.55  | 19768.19  | 23609.96  | 27661.22  | 41883.43  | 23633.04  | 31148.57  | 19485.92  | 36057.88  |

|           |           |           |           |           |           |           |           |           |           |
|-----------|-----------|-----------|-----------|-----------|-----------|-----------|-----------|-----------|-----------|
| LN218.988 |
| 19917.22  | 15490.49  | 27035.21  | 27307.06  | 12670.36  | 27508.37  | 36396.22  | 27486.55  | 36094.65  | 46979.38  |
| 29435.61  | 19584.56  | 20793.97  | 37710.23  | 15480.19  | 38635.53  | 41631.78  | 25064.67  | 31512.95  | 43409.75  |
| 24929.14  | 17611.98  | 24709.87  | 30207.21  | 21782.3   | 30080.1   | 28964.18  | 27697.16  | 36194.36  | 33436.26  |
| 24248.03  | 19703     | 25897.86  | 38690.29  | 23078.7   | 31130.46  | 26596.02  | 25165.03  | 34659.21  | 35355.87  |
| 23594.64  | 18329.09  | 26667.71  | 35685.24  | 20858.65  | 30680     | 27619.65  | 27213.56  | 33964.15  | 36967.62  |

|           |           |           |           |           |           |           |           |           |           |
|-----------|-----------|-----------|-----------|-----------|-----------|-----------|-----------|-----------|-----------|
| LN218.988 |
| 20275.96  | 30969.56  | 32657.42  | 45917.97  | 33573.77  | 20768.16  | 56500.31  | 44541.14  | 25937.04  | 30991.95  |
| 24082.57  | 38473.15  | 45467.51  | 64401.14  | 41013.17  | 19871.25  | 44058.83  | 48737     | 33655.97  | 40946.36  |
| 18413.44  | 44582.4   | 28067.16  | 48424.3   | 37906.34  | 23051.61  | 42452.5   | 46824.06  | 27585.65  | 36801.53  |
| 18402.18  | 33581.34  | 27068.73  | 48605.03  | 44920.73  | 21649.31  | 36398.82  | 43927.3   | 28934.07  | 31402.88  |
| 19867.85  | 37910.22  | 32058.11  | 45715.6   | 40184.34  | 22901.65  | 42359.46  | 40222.2   | 29990.68  | 35706.16  |

|           |           |           |           |           |           |           |           |           |           |
|-----------|-----------|-----------|-----------|-----------|-----------|-----------|-----------|-----------|-----------|
| LN218.988 |
| 40520.34  | 33185.37  | 40801.39  | 13195.02  | 48570.99  | 24615.75  | 41230.9   | 23761.68  | 24487.54  | 14247.61  |
| 38144.53  | 24350.38  | 50514.13  | 20951.2   | 40875.82  | 23230.38  | 27419.78  | 19169.17  | 22720.91  | 21105.98  |
| 30960.21  | 28013.69  | 46495.79  | 19601.18  | 39470.18  | 29869.3   | 32160.84  | 28699.79  | 26689.71  | 16991.4   |
| 34973.04  | 27723.7   | 44716.35  | 20102.95  | 39881.18  | 28506.26  | 35111.15  | 25949.96  | 23216.91  | 15559.81  |
| 30870.83  | 28097     | 40229.72  | 18865.23  | 37414.72  | 28889.54  | 34901.05  | 27600.76  | 25268.33  | 18279.14  |



|           |           |           |           |           |           |           |           |           |           |
|-----------|-----------|-----------|-----------|-----------|-----------|-----------|-----------|-----------|-----------|
| LN218.988 |
| 29057.63  | 42957.44  | 13319.68  | 36751.68  | 12040.69  | 30178.39  | 29757.29  | 30235.96  | 48550.86  | 42943.07  |
| 20066.61  | 37396.21  | 12316.02  | 41291.69  | 13598.02  | 34146.11  | 24136.2   | 34409.31  | 33958.22  | 44457.46  |
| 22420.17  | 35910.25  | 16506.7   | 36690.19  | 17933.99  | 24286.37  | 23461.95  | 38232.4   | 37994.91  | 59286.35  |
| 21135.28  | 36683.28  | 17594.58  | 32984.44  | 19094.81  | 24794.23  | 23355.25  | 33170.99  | 36391.13  | 49191.8   |
| 21171.34  | 35998.37  | 15622.13  | 35128.55  | 17153.15  | 29435.71  | 26712     | 32199.82  | 32280.43  | 52339.34  |

|           |           |           |           |           |           |           |           |           |           |
|-----------|-----------|-----------|-----------|-----------|-----------|-----------|-----------|-----------|-----------|
| LN218.988 |
| 25064.4   | 35034.07  | 28208.77  | 38903.59  | 24267.9   | 48954.68  | 16392.6   | 32812.58  | 33303.1   | 28319.48  |
| 18596.3   | 54615.63  | 30667.27  | 23226.38  | 22027.28  | 37355.66  | 23386.27  | 28736.34  | 37128.79  | 37448.14  |
| 27936.37  | 34023.84  | 20727.73  | 28716.07  | 18199.42  | 40788.13  | 20701.14  | 30241.45  | 38380.15  | 30721.09  |
| 27110.55  | 31405.21  | 22192.27  | 27552.58  | 18445.5   | 42831.62  | 19909.63  | 29427.02  | 32532.9   | 28731.13  |
| 27632.36  | 31489.46  | 23289.16  | 27717.86  | 16954.91  | 44286.29  | 20193.85  | 24718.48  | 36540.02  | 29117.41  |

|           |           |           |           |           |           |           |           |           |           |
|-----------|-----------|-----------|-----------|-----------|-----------|-----------|-----------|-----------|-----------|
| LN218.988 | LN218.988 | LN218.988 | LN219.845 | LN219.845 | LN219.845 | LN220.965 | LN220.965 | LN220.965 | LN220.965 |
| 17315.64  | 30853.42  | 23571.38  | 27912.75  | 12367.63  | 12003.26  | 25715.36  | 34950.01  | 33172.31  | 26223.77  |
| 17610.19  | 20414.01  | 31499.22  | 25883.73  | 12122.41  | 12532.7   | 23236.06  | 33802.72  | 34846.48  | 22729.43  |
| 22239.53  | 23849.07  | 25323.26  | 25433.32  | 10892.9   | 10507.59  | 25917.36  | 35963.12  | 34761.23  | 22468.16  |
| 23175.25  | 23386.77  | 22366.5   | 26317.77  | 13304.87  | 12506.4   | 23060.21  | 28620.8   | 31840.88  | 23760.85  |
| 24285.31  | 23848.58  | 25453.4   | 31794.91  | 13575.5   | 13121.29  | 22964.64  | 30314.6   | 29216.48  | 23791.33  |

|           |           |           |           |           |           |           |           |           |           |
|-----------|-----------|-----------|-----------|-----------|-----------|-----------|-----------|-----------|-----------|
| LN220.965 | LN220.965 | LN220.964 | LN220.965 |
| 30787.01  | 43204.89  | 34334.59  | 26917.06  | 28665.72  | 33007.14  | 18944.36  | 25340.32  | 26430.05  | 25432.02  |
| 29784.93  | 40889.95  | 33617.21  | 22666.42  | 29279.77  | 34304.75  | 18103.25  | 24501.03  | 25666.42  | 22562.25  |
| 29618.04  | 36876.47  | 31467.56  | 22574.01  | 29908.23  | 32860.55  | 18518.74  | 27613.34  | 27447.44  | 22734.72  |
| 28759.1   | 35037.2   | 30808.89  | 22923.53  | 30357.11  | 32019.8   | 18971.81  | 24547.21  | 30017     | 22863.76  |
| 28956.77  | 36177.82  | 30377.33  | 23156.44  | 29252.3   | 32384.17  | 17301.19  | 25130.81  | 28367.56  | 24239.89  |

|           |           |           |           |           |           |           |           |           |           |
|-----------|-----------|-----------|-----------|-----------|-----------|-----------|-----------|-----------|-----------|
| LN220.965 |
| 21307.12  | 38836.32  | 26873.05  | 24311.99  | 19669.35  | 26800.59  | 24326.67  | 28773.1   | 19834.08  | 20682.95  |
| 22639.73  | 34667.58  | 26420.36  | 22041.48  | 23246.36  | 25030.41  | 25320.87  | 29820.29  | 18945.28  | 22822.57  |
| 21462.94  | 36309.76  | 24894.88  | 22436.67  | 19870.32  | 23432.92  | 21352.29  | 29311.14  | 16908.37  | 22705.49  |
| 23077.21  | 33053.26  | 24016.96  | 23165.5   | 22675.79  | 26058.44  | 21707.29  | 30040.98  | 16267.82  | 22677.31  |
| 21870.63  | 32962.22  | 21474.87  | 21588.49  | 23961.45  | 25237.37  | 22894.37  | 27798.51  | 15772.81  | 23357.9   |

|           |           |           |           |           |           |           |           |           |           |
|-----------|-----------|-----------|-----------|-----------|-----------|-----------|-----------|-----------|-----------|
| LN220.965 | LN220.964 |
| 21597.24  | 17271.28  | 25728.18  | 24813.08  | 20975.47  | 35510.15  | 26106.63  | 20599.31  | 21028.79  | 25709.5   |
| 24102.19  | 20687.01  | 27290.75  | 24866.15  | 23133.04  | 33362.11  | 24763.34  | 22186.61  | 20089.13  | 25730.73  |
| 22005.33  | 18454.72  | 24678.19  | 23232.39  | 27012.86  | 33105.68  | 23809.96  | 20278.93  | 18960.48  | 27636.28  |
| 23072.88  | 18121.43  | 24898.56  | 25304.62  | 24527.41  | 36134.4   | 23663.84  | 20728.32  | 20187.94  | 26411.41  |
| 22010.71  | 19063.59  | 24188.46  | 23214.58  | 24215.01  | 34587.51  | 24497.24  | 20374.47  | 18488.73  | 25043.6   |

|           |           |           |           |           |           |           |           |           |           |
|-----------|-----------|-----------|-----------|-----------|-----------|-----------|-----------|-----------|-----------|
| LN220.965 | LN220.965 | LN220.965 | LN220.964 | LN220.965 | LN220.965 | LN220.965 | LN220.965 | LN220.965 | LN220.965 |
| 27313.31  | 30508.96  | 30697.72  | 25405.69  | 23178.32  | 22991.3   | 20715.96  | 31341.89  | 23158.68  | 18113.66  |
| 30529.88  | 29945.78  | 33118.79  | 22929.54  | 21281.46  | 22210.77  | 20537.52  | 34731.55  | 26098.07  | 17052.16  |
| 27005.78  | 28667.11  | 26066.83  | 21575.68  | 18966.8   | 21904.24  | 22612.19  | 29654.57  | 26022.85  | 18132.38  |
| 31620.03  | 27652.3   | 27448.58  | 21959.04  | 19538.72  | 22474.67  | 20426.85  | 31693.05  | 25824.96  | 15587.79  |
| 27045.45  | 30446.1   | 28221.83  | 18970.75  | 19240.42  | 20297.71  | 20862.49  | 33260.13  | 25357.74  | 15411.67  |

|           |           |           |           |           |           |           |           |           |           |
|-----------|-----------|-----------|-----------|-----------|-----------|-----------|-----------|-----------|-----------|
| LN220.982 | LN220.983 | LN220.984 | LN221.842 |
| 27510.52  | 34821.12  | 34689.81  | 31778.35  | 40476.11  | 41928.19  | 26237.57  | 34209.15  | 38938.6   | 22506.68  |
| 28039.79  | 30455.59  | 31158.6   | 29240.66  | 41322.27  | 42394.7   | 22963.12  | 36206.49  | 40778.68  | 24130.51  |
| 28069.93  | 30810.38  | 32065.5   | 30065.4   | 37610.96  | 39455.57  | 25111.25  | 34921.58  | 39700.37  | 21758.94  |
| 25876.61  | 33942.03  | 35022.56  | 33140.95  | 38595.95  | 42759.46  | 24801.7   | 35815.07  | 39001.34  | 23915.98  |
| 28563.39  | 36678.82  | 34932.41  | 29327.23  | 36833.16  | 40960.3   | 26762.86  | 34239.75  | 40680.28  | 25511.49  |



|           |           |           |           |           |           |           |           |           |           |
|-----------|-----------|-----------|-----------|-----------|-----------|-----------|-----------|-----------|-----------|
| LN221.842 | LN223.027 | LN223.027 | LN223.028 |
| 11006.01  | 37225.11  | 31249.78  | 19669.74  | 19433.05  | 17978.01  | 11403.05  | 19193.78  | 23559.23  | 17239.23  |
| 10396.46  | 34959.39  | 28477.79  | 20767.05  | 20706.23  | 20623.77  | 13165.64  | 18978.26  | 26261.98  | 16663.76  |
| 10530.95  | 38072.62  | 31649.82  | 25345.19  | 24391.12  | 23160.89  | 14208.2   | 18404.56  | 21300.92  | 16691.36  |
| 12565.1   | 34159.62  | 31469.6   | 26233.19  | 28690.33  | 25775.22  | 12229.76  | 16936.01  | 22961.04  | 14575.92  |
| 13334.77  | 38399.21  | 30320.25  | 28610.68  | 29553.43  | 27603.28  | 14990.87  | 17553.83  | 23989.64  | 15683.73  |

|           |           |           |           |           |           |           |           |           |           |           |
|-----------|-----------|-----------|-----------|-----------|-----------|-----------|-----------|-----------|-----------|-----------|
| LN223.028 | LN224.908 | LN224.996 | LN224.996 |
| 24091.64  | 20440.32  | 16206.47  | 21620.1   | 24767.2   | 28885.96  | 22038.64  | 63672.77  | 55534.72  | 66207.93  |           |
| 24467.31  | 19516.53  | 14694.59  | 24701.08  | 21636.09  | 30287.66  | 20759.41  | 54731.97  | 34919.24  | 40347.47  |           |
| 24601.9   | 20755.45  | 15395.71  | 22301.45  | 23613.32  | 28652.81  | 18708.06  | 53422.84  | 49492.24  | 67720.4   |           |
| 24040.5   | 20019.81  | 17605.87  | 26056.12  | 23217.97  | 33389.72  | 19733.23  | 65173.5   | 42519.91  | 43613.62  |           |
| 24500.26  | 20946.36  | 17486.63  | 25443.6   | 25659.06  | 33917.77  | 19817.16  | 65487.3   | 43703.49  | 43987.44  |           |

|           |           |           |           |           |           |           |           |           |           |
|-----------|-----------|-----------|-----------|-----------|-----------|-----------|-----------|-----------|-----------|
| LN224.996 | LN224.996 | LN224.997 | LN224.996 | LN224.997 | LN224.996 | LN224.996 | LN224.996 | LN224.996 | LN224.997 |
| 37798.53  | 25500.92  | 25601.48  | 30700.83  | 27247.15  | 52450.15  | 39617.45  | 51001.14  | 36303.34  | 33157.37  |
| 37865.76  | 22958.85  | 27306.48  | 32843.79  | 26631.26  | 47004.54  | 32683.61  | 38513.98  | 33581.46  | 36883.08  |
| 41425.53  | 25022.63  | 27995.16  | 31734.66  | 30456.33  | 50735.1   | 50798.89  | 39670.38  | 36166.92  | 38202.24  |
| 38609.07  | 25511.28  | 30930.76  | 38677.02  | 30720.3   | 33977.29  | 33554.23  | 43644.92  | 37454.08  | 36794.19  |
| 39782.44  | 26658.01  | 29342.24  | 32688.96  | 27045.85  | 35241.09  | 35729.76  | 41939.57  | 38245.79  | 36441.9   |

|           |           |           |           |           |           |           |           |           |           |
|-----------|-----------|-----------|-----------|-----------|-----------|-----------|-----------|-----------|-----------|
| LN224.999 | LN224.999 | LN224.999 | LN224.999 | LN224.998 | LN224.999 | LN224.999 | LN224.999 | LN224.999 | LN224.999 |
| 31078.21  | 37914.47  | 35289.4   | 26458.73  | 42821.81  | 44325.67  | 31868.31  | 42042.39  | 52433.56  | 40341.91  |
| 32612.17  | 37963.43  | 34208.08  | 30733.96  | 40987.3   | 46090.94  | 33063.36  | 43550.32  | 55095.12  | 39467.84  |
| 33551.65  | 40882.38  | 37378.97  | 30784.58  | 46571     | 47575.85  | 36780.8   | 41891.03  | 58020.75  | 45023.28  |
| 37202.43  | 39493.83  | 37628.91  | 29369.83  | 44936.12  | 46094.46  | 37280.11  | 43353.54  | 57567.71  | 48007.21  |
| 36619.54  | 40730.22  | 41267.44  | 27518.73  | 44580.29  | 50798.12  | 32267.25  | 44110.44  | 56843.42  | 49426.76  |

|           |           |           |           |           |           |           |           |           |           |
|-----------|-----------|-----------|-----------|-----------|-----------|-----------|-----------|-----------|-----------|
| LN224.999 | LN224.999 | LN225.024 | LN225.024 | LN225.025 | LN225.037 | LN225.077 | LN225.077 | LN225.077 | LN225.077 |
| 47398.41  | 31296.15  | 27662.76  | 24010.78  | 20317.01  | 32120.69  | 171083.4  | 108416.6  | 121167.1  | 119180.4  |
| 45559.54  | 32196.1   | 28703.11  | 25514.12  | 23465.69  | 33021.53  | 147635    | 139484.7  | 121412.6  | 127157.9  |
| 48792.02  | 35699.81  | 28393.1   | 24685.35  | 20346.88  | 28344.94  | 177432.1  | 108543.4  | 109497.6  | 123098    |
| 47426.33  | 36383.93  | 26549.56  | 25415.32  | 19454.75  | 31067.95  | 175090.5  | 110600.4  | 118807.8  | 117655.6  |
| 52129.8   | 35546.81  | 28758.53  | 23427.14  | 21333.61  | 30845.32  | 172652    | 105119    | 113205.5  | 119509.9  |

|           |           |           |           |           |           |           |           |           |           |
|-----------|-----------|-----------|-----------|-----------|-----------|-----------|-----------|-----------|-----------|
| LN225.077 | LN225.079 | LN225.078 | LN225.078 | LN225.079 | LN225.078 | LN225.078 | LN225.077 | LN225.078 | LN225.077 |
| 96335.03  | 122801.8  | 91235.32  | 169722.8  | 173006.1  | 116164.6  | 178088.1  | 95082.51  | 129621.8  | 184328.6  |
| 92442.76  | 111910    | 77619.63  | 168343.7  | 176293.8  | 117162.3  | 186174.8  | 92242.83  | 124224.5  | 190581.9  |
| 99170.63  | 102322    | 119253.9  | 181459.7  | 177978.1  | 123760.4  | 171790.2  | 102624.5  | 129633.1  | 188170.8  |
| 100875.1  | 109547.6  | 92237.86  | 189606.1  | 187942.1  | 123723.1  | 188600.6  | 101768.1  | 131302.2  | 190777.6  |
| 96616.53  | 112116    | 93252.7   | 204922.3  | 180072.3  | 123443.3  | 190245    | 101913    | 145570.8  | 182555.1  |

|           |           |           |           |           |           |           |           |           |           |
|-----------|-----------|-----------|-----------|-----------|-----------|-----------|-----------|-----------|-----------|
| LN225.078 | LN225.078 | LN225.078 | LN225.078 | LN225.078 | LN225.079 | LN225.077 | LN225.077 | LN225.078 | LN225.078 |
| 113149.7  | 95412.67  | 99891.31  | 121563.8  | 114523.1  | 57667.42  | 117005.6  | 92320.54  | 72846.48  | 109002.4  |
| 108313.2  | 158149.9  | 97082.99  | 114986.3  | 118846.1  | 60280.35  | 120212.5  | 105371.4  | 71680.98  | 147805.8  |
| 114013.8  | 101224.1  | 105627.3  | 117516    | 115976.8  | 60561.18  | 110351.4  | 99434.35  | 78774.11  | 105501.2  |
| 118252.2  | 102570.9  | 101897.9  | 115305.3  | 127385.9  | 58129.24  | 116857.4  | 102690.7  | 76716.11  | 101547    |
| 116623.5  | 104966.7  | 107773.1  | 115781.6  | 131025.1  | 65261.55  | 114888.4  | 99559.7   | 75805.97  | 105915.2  |

|           |           |           |           |           |           |           |           |           |           |
|-----------|-----------|-----------|-----------|-----------|-----------|-----------|-----------|-----------|-----------|
| LN225.078 | LN225.079 | LN225.077 | LN225.078 | LN225.079 | LN225.078 | LN225.079 | LN225.078 | LN225.079 | LN225.079 |
| 50533.92  | 44382.59  | 111628    | 113925.2  | 55052.22  | 64830.59  | 49187.5   | 116055.5  | 114589.4  | 204547.1  |
| 48018.33  | 50033.87  | 118345.1  | 111666.5  | 54288.34  | 65427.63  | 52265.66  | 119079.7  | 117913.7  | 205184.2  |
| 54734.53  | 50441.18  | 115597.6  | 118688.8  | 58870.57  | 67037.09  | 49777.83  | 110018.4  | 125239.2  | 202769.1  |
| 53133.09  | 55423.52  | 126185.1  | 112424.4  | 57501.97  | 70098.64  | 55316.57  | 123691.8  | 115609.3  | 203315.4  |
| 52110.64  | 58288.71  | 118127.2  | 111507.7  | 62345.99  | 69812.59  | 54741.31  | 113102.3  | 108421.3  | 200943.2  |



|           |           |           |           |           |           |           |           |           |           |
|-----------|-----------|-----------|-----------|-----------|-----------|-----------|-----------|-----------|-----------|
| LN225.079 | LN225.078 | LN225.078 | LN225.078 | LN225.078 | LN225.078 | LN225.079 | LN225.078 | LN225.078 | LN225.078 |
| 118147.7  | 92681.47  | 51458.66  | 102638.3  | 138714.5  | 95406.72  | 89270.22  | 57824.87  | 98544.92  | 72953.16  |
| 116368.6  | 98387.99  | 59269.84  | 99784.14  | 132338    | 102042.6  | 94888.02  | 56351.66  | 100794.1  | 72652.38  |
| 114046.2  | 88675.87  | 59184.1   | 102054.6  | 135534.3  | 106152.6  | 95428.54  | 62023.88  | 105010.4  | 74474.04  |
| 126959.6  | 88790.43  | 58904.5   | 103534.6  | 138035.9  | 99806.95  | 95223.2   | 59662.87  | 107996    | 80907.78  |
| 117877.7  | 96058.75  | 54330.52  | 100283.5  | 130397.9  | 96461.69  | 93373.46  | 61751.7   | 99893.02  | 78976.93  |

|           |           |           |           |           |           |           |           |           |           |
|-----------|-----------|-----------|-----------|-----------|-----------|-----------|-----------|-----------|-----------|
| LN225.078 | LN225.079 | LN225.079 | LN225.079 | LN225.078 | LN225.896 | LN226.963 | LN226.965 | LN226.965 | LN226.965 |
| 44952.22  | 51285.38  | 74072.96  | 54158.58  | 58099.09  | 246212.9  | 62033.32  | 143959.8  | 125738.3  | 162012.8  |
| 45149.66  | 48054.46  | 79659.6   | 59332.68  | 54557.55  | 239411.5  | 46783.41  | 145478.1  | 123860    | 159115.8  |
| 47679.65  | 51041.01  | 76903.34  | 60159.86  | 55885.12  | 208405.6  | 53030.01  | 147027.3  | 118688    | 156628.2  |
| 45930.74  | 57635.18  | 72108.64  | 61635.73  | 57535.01  | 289342.5  | 71160.08  | 143612.8  | 125768.3  | 148148    |
| 49160.7   | 50979.06  | 72675.94  | 62708.98  | 57860.87  | 316887.8  | 44397.03  | 136297.8  | 120193.2  | 145118.2  |

|           |           |           |           |           |           |           |           |           |           |
|-----------|-----------|-----------|-----------|-----------|-----------|-----------|-----------|-----------|-----------|
| LN226.965 | LN226.965 | LN226.978 | LN226.978 | LN226.994 | LN226.994 | LN226.994 | LN226.994 | LN226.994 | LN226.994 |
| 137582.1  | 169043    | 140079    | 137493.3  | 55539.94  | 50897.89  | 113884.7  | 96511.58  | 90611.52  | 81193.06  |
| 124141    | 160405.9  | 140662.4  | 133358.8  | 54343.52  | 43934.19  | 125159.2  | 87546.02  | 102880.8  | 86439.36  |
| 144828.5  | 160245.9  | 136529.9  | 139653    | 37233.33  | 94328.24  | 138028.7  | 140372.2  | 102775.2  | 87904.26  |
| 133735.4  | 151816.8  | 141087    | 134795.9  | 93501.68  | 116311.5  | 144623.5  | 86466.59  | 101234.5  | 88006.29  |
| 126146.6  | 158571.9  | 127694.6  | 128915.1  | 46464.47  | 48172.91  | 125365.5  | 90306.02  | 146567    | 85102.38  |

|           |           |           |           |           |           |           |           |           |           |
|-----------|-----------|-----------|-----------|-----------|-----------|-----------|-----------|-----------|-----------|
| LN226.994 |
| 81357.01  | 64368.41  | 72518.33  | 81221.95  | 61685.14  | 54766.14  | 139475.5  | 111041.2  | 107578.8  | 71307.52  |
| 86576.64  | 97233.65  | 85181.37  | 71933.02  | 66034.26  | 53704.05  | 90289.41  | 71053.68  | 60393.99  | 72735.22  |
| 162430.3  | 77162.2   | 76620.63  | 65819.52  | 50407.75  | 78077.56  | 94784.23  | 89461.25  | 80194.99  | 54935.69  |
| 161499.7  | 58761.01  | 146421    | 110411    | 103087.9  | 106549    | 95327.67  | 141904.7  | 137532.4  | 117105.5  |
| 95365.78  | 73558.68  | 72254.34  | 73448.51  | 57039.32  | 61758.26  | 114142.2  | 81240.34  | 74873.99  | 36644.55  |

|           |           |           |           |           |           |           |           |           |           |
|-----------|-----------|-----------|-----------|-----------|-----------|-----------|-----------|-----------|-----------|
| LN226.994 |
| 101702    | 76270.26  | 94141.34  | 79796.45  | 52356.7   | 41888.29  | 55399.47  | 44800.95  | 81531.11  | 75230.8   |
| 63740.71  | 62726.07  | 63725.55  | 98860.58  | 58352.08  | 58880.94  | 50107.52  | 61826     | 46787.25  | 102935.8  |
| 74481.53  | 45687.57  | 79064.23  | 57302.81  | 79465.13  | 55772.45  | 63610.71  | 39200.26  | 128379.9  | 99589.49  |
| 65661.02  | 142029.9  | 125634.9  | 70363.39  | 133721.1  | 102362.6  | 133414.4  | 97875.07  | 130604.3  | 132150    |
| 95517.84  | 56672.62  | 49818.73  | 67494.46  | 33228.44  | 54721.54  | 52532.78  | 33054.37  | 56762.7   | 91906.25  |

|           |           |           |           |           |           |           |           |           |           |
|-----------|-----------|-----------|-----------|-----------|-----------|-----------|-----------|-----------|-----------|
| LN226.994 |
| 23955.55  | 102511    | 40779.8   | 78622.63  | 63500.53  | 57958.09  | 91529.38  | 60935.22  | 53530.42  | 70318.97  |
| 21436.59  | 102633.6  | 36094.93  | 27175.8   | 67463.64  | 43161.18  | 89330.32  | 60001     | 54642.02  | 97184.49  |
| 17275.11  | 100401.7  | 27269.58  | 24495     | 45566.5   | 57946.26  | 118711.8  | 56158.24  | 46393.51  | 62959.23  |
| 49526.36  | 83221.32  | 65408.32  | 75647.82  | 104399.6  | 115694.8  | 81025.98  | 123693    | 127694.6  | 75524.09  |
| 22496.54  | 96631.09  | 21823.86  | 23230.1   | 40037.57  | 54373.23  | 69740.41  | 50598.39  | 48894.87  | 49869.45  |

|           |           |           |           |           |           |           |           |           |           |
|-----------|-----------|-----------|-----------|-----------|-----------|-----------|-----------|-----------|-----------|
| LN226.994 |
| 135556.8  | 38634.29  | 86439.73  | 44100.03  | 87284.9   | 119542    | 51146.61  | 57374.06  | 47189.34  | 91877.05  |
| 65391.08  | 55920.49  | 81026.84  | 43931.56  | 85701.22  | 78685.87  | 106392.1  | 67575.42  | 115565.8  | 125328.4  |
| 65391.71  | 48548.11  | 96601     | 46543.8   | 99097.69  | 112113.8  | 88098.01  | 57824.95  | 48807.41  | 126321.5  |
| 66396.85  | 110236.1  | 69519.03  | 97084.46  | 94376.64  | 85387.04  | 122322.4  | 75123.34  | 115283.1  | 143306.1  |
| 81707.38  | 52517.72  | 83717.66  | 54308.32  | 98247.83  | 107866.1  | 47565.82  | 106898.8  | 41089.8   | 88551.72  |

|           |           |           |           |           |           |           |           |           |           |
|-----------|-----------|-----------|-----------|-----------|-----------|-----------|-----------|-----------|-----------|
| LN226.994 |
| 37821.01  | 26314.9   | 92078.6   | 41064.16  | 131988.3  | 98207.5   | 66831.33  | 59545.75  | 127878.5  | 110348.8  |
| 33024.63  | 27893.63  | 97052.22  | 36536.47  | 145483.7  | 72013     | 62259.35  | 44312.3   | 132697.4  | 98384.31  |
| 20882.93  | 25179.47  | 39594.95  | 43848.4   | 102194.4  | 124475.8  | 102622.6  | 51759.59  | 83290.11  | 103087.7  |
| 75797.44  | 66287.64  | 79897.78  | 95632.68  | 85194.9   | 103641    | 108602.3  | 92864.99  | 77592.1   | 97952.56  |
| 22070.23  | 29319.85  | 79725.23  | 51258.82  | 114617.4  | 97382.57  | 60623.09  | 46923.5   | 90681.31  | 86533.32  |



|           |           |           |           |           |           |           |           |           |           |
|-----------|-----------|-----------|-----------|-----------|-----------|-----------|-----------|-----------|-----------|
| LN226.994 |
| 42793.23  | 39057.41  | 51778.13  | 37592.5   | 96154.79  | 52044.13  | 112187    | 69094.1   | 87573.46  | 24262.36  |
| 76375.56  | 33833.02  | 60159.71  | 37255.83  | 93008.07  | 55009.51  | 110446.1  | 84758.49  | 116639.5  | 37811.91  |
| 40162.89  | 24354.03  | 47831.44  | 89279.2   | 28045.61  | 48134.42  | 86423.54  | 125327.4  | 68068.65  | 70990.54  |
| 97944.3   | 67476.78  | 106893.6  | 82925.89  | 83979.75  | 113834    | 81040.12  | 112522.1  | 65443.35  | 66816.67  |
| 48123.85  | 28914.54  | 44042.35  | 40031.65  | 79421.52  | 45218.24  | 89818.63  | 114171.1  | 95915.06  | 23570.17  |

|           |           |           |           |           |           |           |           |           |           |
|-----------|-----------|-----------|-----------|-----------|-----------|-----------|-----------|-----------|-----------|
| LN226.994 |
| 58506.57  | 110272.4  | 36878.27  | 74246.56  | 63318.5   | 110880.9  | 61147.92  | 92729.11  | 44301.13  | 44030.16  |
| 59169.52  | 76025.76  | 24486.51  | 74084.38  | 103465.8  | 68930.2   | 130943.1  | 86453.27  | 38419.35  | 115765.8  |
| 34109.87  | 118850    | 29445.62  | 89409.56  | 95009.63  | 75476.93  | 59698.93  | 74181.47  | 39570.96  | 52051.04  |
| 127681.3  | 125156.8  | 83419.98  | 141287.3  | 103691.7  | 123512.9  | 136864    | 135502.1  | 100491.3  | 106757.3  |
| 47779.55  | 88571.47  | 25360.63  | 57958.99  | 78549.32  | 43564.07  | 75847.67  | 85832.96  | 34112.94  | 61550.74  |

|           |           |           |           |           |           |           |           |           |           |
|-----------|-----------|-----------|-----------|-----------|-----------|-----------|-----------|-----------|-----------|
| LN226.994 | LN227.893 | LN228.991 |
| 63694.15  | 74500.6   | 24773.02  | 23278.38  | 58989.09  | 83122.09  | 50337.71  | 31035.26  | 77144.15  | 35755.11  |
| 63942.22  | 67993.98  | 23519.72  | 29192.02  | 42004.88  | 35546.32  | 52300.99  | 25431.63  | 74352.79  | 41200.69  |
| 59407.79  | 61487.14  | 34029.7   | 21768.15  | 32308.81  | 49789.66  | 54658.4   | 26088.86  | 67723.23  | 40027.26  |
| 111310.9  | 138762.8  | 73152.85  | 52190.08  | 114296.1  | 81123.07  | 135516.6  | 28840.79  | 87503.66  | 41569.59  |
| 117533.6  | 54344.22  | 22433.95  | 19472.37  | 103488.1  | 37434.28  | 85255.28  | 28615.26  | 94964.02  | 41428.92  |

|           |           |           |           |           |           |           |           |           |           |
|-----------|-----------|-----------|-----------|-----------|-----------|-----------|-----------|-----------|-----------|
| LN228.991 |
| 28551.74  | 39352.58  | 43756.69  | 33476.33  | 41741.69  | 36288.13  | 41775.08  | 31043.14  | 40804.93  | 32446.12  |
| 25956.06  | 37732.17  | 42782.11  | 34217.88  | 40594     | 33953.58  | 41791.13  | 33289.71  | 39391.95  | 27847.15  |
| 31572.05  | 40242.92  | 47062.12  | 35704.46  | 33274.53  | 37510.44  | 43375.54  | 33346.52  | 41412.57  | 36501.17  |
| 33706.05  | 44965.78  | 50576.34  | 37565.67  | 41491.43  | 34986.86  | 40965.07  | 33211.85  | 43277.01  | 36900.25  |
| 33076.84  | 46073.76  | 53715.58  | 36985.06  | 41896.47  | 37912.9   | 42893.88  | 36616.1   | 42155.37  | 36976.64  |

|           |           |           |           |           |           |           |           |           |           |
|-----------|-----------|-----------|-----------|-----------|-----------|-----------|-----------|-----------|-----------|
| LN228.991 |
| 35220.48  | 30519.21  | 37369.67  | 40213.41  | 27835.45  | 39677.45  | 24603.83  | 27065.01  | 24581.2   | 26638.05  |
| 34402.01  | 30371.1   | 34121.69  | 41610.4   | 28463.49  | 41704.99  | 25484.85  | 26130.69  | 24592.53  | 29152.11  |
| 36566.52  | 31436.61  | 35870     | 40432.67  | 32588.68  | 41683.2   | 27812.13  | 28506.36  | 23902.99  | 29515.59  |
| 37283.95  | 30907.32  | 40380.48  | 46248.61  | 33188.43  | 41027.1   | 27796.86  | 29151.27  | 24358.72  | 29487.78  |
| 39714.94  | 32945.87  | 38700.47  | 42965.82  | 32673.16  | 38906.78  | 26666.18  | 30181.8   | 29378.26  | 30051.2   |

|           |           |           |           |           |           |           |           |           |           |
|-----------|-----------|-----------|-----------|-----------|-----------|-----------|-----------|-----------|-----------|
| LN228.991 | LN228.991 | LN228.991 | LN228.992 | LN228.992 | LN228.991 | LN228.991 | LN228.991 | LN228.991 | LN228.991 |
| 23759.27  | 27342.63  | 33773.6   | 20599.2   | 20438.43  | 17059.72  | 12480.96  | 20943.05  | 16433.16  | 14236.3   |
| 25968.05  | 27794.05  | 35017.6   | 22239.9   | 20033.77  | 15598.15  | 12240.72  | 20864.88  | 16302.63  | 16034.23  |
| 27358.98  | 29514.77  | 33812.39  | 22668.6   | 22313.78  | 18078.79  | 10264.53  | 20883.27  | 17332.14  | 13681.9   |
| 24602.52  | 29795.9   | 37238.7   | 24105.66  | 22661.27  | 15837.71  | 10671.73  | 22432.01  | 15266.52  | 14626.5   |
| 24469.2   | 27936.66  | 35793.47  | 23309.47  | 20439.15  | 18695.8   | 9581.666  | 22044.97  | 16655.19  | 14099.78  |

|           |           |           |           |           |           |           |           |           |           |
|-----------|-----------|-----------|-----------|-----------|-----------|-----------|-----------|-----------|-----------|
| LN228.991 | LN228.991 | LN228.991 | LN228.991 | LN228.992 | LN228.991 | LN228.991 | LN228.991 | LN228.991 | LN228.991 |
| 16100.86  | 18622.14  | 23346     | 16829.25  | 17005.84  | 14110.16  | 15980.61  | 23346.41  | 11959.26  | 15507.47  |
| 18663.49  | 19883.18  | 22242.46  | 14876.32  | 18562.24  | 13552.08  | 16500.14  | 23080.6   | 15720.97  | 15309.18  |
| 18301.03  | 19510.32  | 24149.25  | 14634.28  | 17050.02  | 14002.38  | 15616.22  | 24702.39  | 12664.99  | 16141.95  |
| 15997.99  | 22604.77  | 22444.14  | 14103.84  | 18701.32  | 13912.6   | 15626.16  | 24087.38  | 13298.73  | 14467.37  |
| 16566.25  | 21242.15  | 21160.93  | 14865.93  | 16423.85  | 13798.48  | 15546.79  | 24366.52  | 13220.63  | 15441.84  |

|           |           |           |           |           |           |           |           |           |           |
|-----------|-----------|-----------|-----------|-----------|-----------|-----------|-----------|-----------|-----------|
| LN228.991 | LN228.991 | LN228.991 | LN228.991 | LN228.992 | LN228.991 | LN228.991 | LN228.991 | LN228.990 | LN228.991 |
| 25622.32  | 26283.89  | 22675.95  | 29977.52  | 19628.45  | 29532.61  | 24872.23  | 24197.67  | 12084.74  | 28948.83  |
| 24873.25  | 24952.83  | 22904.53  | 29165.05  | 20088.08  | 30334.25  | 25409.83  | 21190.07  | 12902.26  | 29984.26  |
| 26754.56  | 24039.64  | 22887.61  | 25680.51  | 18748.92  | 30773.65  | 22700.8   | 23729.69  | 11679.66  | 28741.92  |
| 23718.93  | 24190.43  | 23157.85  | 27392.89  | 17611.99  | 31148.58  | 24829.41  | 21116.92  | 11130.99  | 28474.99  |
| 25410.34  | 23750.76  | 23183.9   | 27674.95  | 20105.97  | 29544.46  | 24139.87  | 23396.16  | 12452.11  | 28497.73  |



|           |           |           |           |           |           |           |           |           |           |
|-----------|-----------|-----------|-----------|-----------|-----------|-----------|-----------|-----------|-----------|
| LN228.991 | LN228.992 | LN228.991 |
| 21892.42  | 23454.93  | 13976.44  | 20240.36  | 15307.5   | 15518.4   | 15017.27  | 18353.92  | 24047.38  | 22313.26  |
| 22364.73  | 21366.52  | 13575.81  | 19267.25  | 17366.04  | 14774.87  | 13500.4   | 18902.64  | 22338.67  | 19697.49  |
| 22585.23  | 23235.9   | 15068.53  | 19531.11  | 16432.88  | 16834.4   | 13528.87  | 19553.79  | 23500.67  | 20251.21  |
| 21445.83  | 22878.78  | 12857.76  | 19931.86  | 17957.23  | 14996.06  | 13784.26  | 16092.7   | 18652.71  | 21456.87  |
| 22342.81  | 22929.32  | 13701.71  | 18953.33  | 17752.66  | 17139.26  | 13263.86  | 17700.93  | 20387.76  | 21787.67  |

|           |           |           |           |           |           |           |           |           |           |
|-----------|-----------|-----------|-----------|-----------|-----------|-----------|-----------|-----------|-----------|
| LN228.991 | LN228.991 | LN228.990 | LN228.991 | LN228.991 | LN228.991 | LN228.990 | LN228.991 | LN228.990 | LN228.991 |
| 22977.82  | 24360.94  | 13200.79  | 19709.5   | 36012.67  | 28406.92  | 12712.84  | 17653.4   | 11532.17  | 25181.63  |
| 19992.43  | 26947.75  | 10792.21  | 21931.66  | 35752.18  | 27361.98  | 13929.52  | 16777.19  | 13553.9   | 28194.82  |
| 18373.29  | 29382.9   | 13135.05  | 19807     | 34178.58  | 26849.11  | 11364     | 15700.07  | 10322.41  | 28892.52  |
| 19636.15  | 24179.84  | 12904.03  | 20380.21  | 35608.9   | 24915.93  | 13652.57  | 17401.98  | 10876.98  | 27965.98  |
| 20032.43  | 28426.52  | 12274.42  | 21588.25  | 35223.64  | 24397.99  | 12278.7   | 17407.01  | 10118.7   | 28479.79  |

|           |           |           |           |           |           |           |           |           |           |
|-----------|-----------|-----------|-----------|-----------|-----------|-----------|-----------|-----------|-----------|
| LN228.990 | LN228.991 | LN228.990 | LN228.991 | LN228.991 | LN228.991 | LN228.991 | LN228.990 | LN228.991 | LN228.991 |
| 11359.07  | 17517.21  | 11421.06  | 26684.5   | 19110.97  | 36381.9   | 25713.06  | 21490.22  | 26428.15  | 39537.81  |
| 12923.89  | 18274.51  | 13502.41  | 28626.68  | 21397.87  | 34966.38  | 26304.79  | 20510.01  | 23546.19  | 35107.04  |
| 10051.95  | 17061.92  | 13949.75  | 27009.79  | 22625.31  | 33284.37  | 24458.68  | 19104.3   | 25252.46  | 35905.87  |
| 11171.45  | 17594.82  | 12568.74  | 27689.66  | 21911.1   | 34134.21  | 27002.63  | 17999.4   | 24884.66  | 33785.4   |
| 10815.76  | 16225.96  | 12895.59  | 27294.52  | 22524.12  | 30960.24  | 26340.01  | 17017.26  | 25456.11  | 37409.82  |

|           |           |           |           |           |           |           |           |           |           |
|-----------|-----------|-----------|-----------|-----------|-----------|-----------|-----------|-----------|-----------|
| LN228.991 | LN228.991 | LN229.008 | LN229.144 | LN229.143 | LN229.144 | LN229.873 | LN229.936 | LN230.047 | LN230.047 |
| 23137.28  | 24991.99  | 35960.99  | 23669.06  | 19005.63  | 19517.23  | 26479.95  | 33262.34  | 46323.36  | 54600.23  |
| 24935.12  | 25150.2   | 32877.85  | 23474.33  | 16796.44  | 20658.54  | 20946.45  | 23852.51  | 42100.15  | 52874.96  |
| 23419.11  | 22524.69  | 34303.74  | 22970.26  | 18161.08  | 17009.19  | 19473.56  | 18936.37  | 52442.83  | 50599.53  |
| 24848.59  | 23385.57  | 34555.31  | 21606.05  | 18328.77  | 18260.16  | 24003.96  | 17174.03  | 52582.65  | 53621.92  |
| 25102.63  | 25610.18  | 32947.19  | 21174.6   | 18067.24  | 18827.18  | 24558.37  | 27130.36  | 50504.73  | 48887.94  |

|           |           |           |           |           |           |           |           |           |           |           |
|-----------|-----------|-----------|-----------|-----------|-----------|-----------|-----------|-----------|-----------|-----------|
| LN230.047 | LN230.048 | LN230.048 | LN230.048 |
| 57059.96  | 42812.87  | 60316.98  | 52251.31  | 38694.6   | 33378.06  | 94970.57  | 56906.53  | 109613.6  | 62338.39  |           |
| 59712.63  | 53023.71  | 59459.6   | 48262.36  | 40606.19  | 33136.84  | 93096.64  | 92097.78  | 104294.2  | 78746.93  |           |
| 52391.81  | 49691.75  | 65341.91  | 53208.87  | 43603.81  | 34895.49  | 93359.25  | 86390.94  | 162451.1  | 72346.82  |           |
| 57047.7   | 45589.97  | 57905.38  | 52073.45  | 46152.63  | 32508.21  | 90622.59  | 78127.99  | 130100.1  | 69404.95  |           |
| 58135.69  | 55105.79  | 59099.25  | 50499.99  | 36525.2   | 35208.23  | 93201.74  | 79436.21  | 120649.6  | 104055    |           |

|           |           |           |           |           |           |           |           |           |           |
|-----------|-----------|-----------|-----------|-----------|-----------|-----------|-----------|-----------|-----------|
| LN230.048 |
| 30999.11  | 33053.01  | 98687.39  | 98960.43  | 88664.36  | 128355    | 94366.08  | 113472.8  | 98826.97  | 135943.4  |
| 27755.3   | 42627.45  | 123187.9  | 108529.9  | 74603.71  | 133184    | 122400.7  | 103750    | 99285.23  | 96567.24  |
| 26156.02  | 37572.69  | 155024.5  | 120401.6  | 100226.5  | 82570.01  | 89122.45  | 135951.4  | 96802.28  | 134364.8  |
| 28739.42  | 42541.81  | 130338.6  | 94274.22  | 67564.49  | 95591.6   | 81930.51  | 124574.4  | 111669.6  | 119780.6  |
| 52165.6   | 32019.7   | 141510.9  | 87287.55  | 62019.65  | 113779.1  | 141126.5  | 91828.37  | 138318.7  | 110346.7  |

|           |           |           |           |           |           |           |           |           |           |
|-----------|-----------|-----------|-----------|-----------|-----------|-----------|-----------|-----------|-----------|
| LN230.048 |
| 72601.47  | 136890.9  | 101574.9  | 19550.01  | 136733.6  | 49716.39  | 118911    | 21389.87  | 84072.09  | 108273.9  |
| 82624.22  | 72841.87  | 118109.5  | 18254.66  | 162695.5  | 72168.65  | 115783    | 22202.42  | 58453.98  | 95371.51  |
| 52434.04  | 86735.95  | 71700.52  | 16488.58  | 96291.8   | 50645.41  | 145783.1  | 28927.63  | 51088.25  | 106097    |
| 77311.82  | 153744.6  | 95271.63  | 16873.69  | 100700.8  | 72688.33  | 110780.7  | 24324.75  | 62907.46  | 106877.3  |
| 81338.42  | 106822.5  | 96501.24  | 20522.54  | 126339.1  | 56533.55  | 107892.3  | 30892.74  | 55997.07  | 133875.6  |

|           |           |           |           |           |           |           |           |           |           |
|-----------|-----------|-----------|-----------|-----------|-----------|-----------|-----------|-----------|-----------|
| LN230.048 |
| 78622.8   | 175349.4  | 54837.25  | 42807.72  | 72720.89  | 36566.46  | 74823.08  | 70223.76  | 142811.6  | 44802.1   |
| 105076.9  | 144010.6  | 63845.27  | 37164.33  | 86156.28  | 63049.67  | 45823.94  | 52453.8   | 106076.1  | 45194.52  |
| 102479.6  | 166235.3  | 35236.2   | 50664.75  | 88987.33  | 40133.29  | 56634.64  | 56901.18  | 88365.04  | 46685.7   |
| 89762.75  | 170814.7  | 41147.17  | 49885.12  | 63026.08  | 54530.35  | 83792.95  | 45391.91  | 114623.5  | 42188.06  |
| 94971.18  | 118911.1  | 48272.99  | 54916.46  | 67925.41  | 56159.58  | 57705.34  | 41693.11  | 132044.3  | 40091.23  |



|           |           |           |           |           |           |           |           |           |           |
|-----------|-----------|-----------|-----------|-----------|-----------|-----------|-----------|-----------|-----------|
| LN230.048 |
| 51762.65  | 67319.91  | 92238.53  | 55038.92  | 52237.01  | 57708.98  | 31262.66  | 66535.36  | 119508.5  | 83297.99  |
| 62174.52  | 82576.62  | 111707    | 38607.62  | 61162.35  | 41945.99  | 32739.88  | 40058.69  | 154369.4  | 186001.6  |
| 66286.99  | 104859.2  | 97326.31  | 40944.76  | 79082.12  | 43273.28  | 30006.18  | 43439.37  | 103309.9  | 126624.8  |
| 59651.53  | 65725.22  | 85741.04  | 51183.96  | 53403.9   | 38304.98  | 34166.42  | 57912.6   | 122236.9  | 94659.96  |
| 59754.51  | 67765.96  | 99434.3   | 57372.7   | 86915.76  | 46069.33  | 26782.03  | 43225.54  | 85873.9   | 111698.7  |

|           |           |           |           |           |           |           |           |           |           |
|-----------|-----------|-----------|-----------|-----------|-----------|-----------|-----------|-----------|-----------|
| LN230.048 |
| 111728.2  | 114358.5  | 44280.18  | 155885.2  | 28198.19  | 29823.08  | 104984.1  | 83965.09  | 90559.35  | 33853.07  |
| 75595.56  | 109783.1  | 39788.97  | 108499.5  | 30519.09  | 26940.71  | 110891.5  | 93860.87  | 95392.06  | 39080.37  |
| 116532.9  | 145666.5  | 60168.23  | 105393.3  | 29499.74  | 27435.66  | 109792.3  | 71890.45  | 102579    | 25052.83  |
| 118270.9  | 132048    | 50928.2   | 121294.9  | 31724.49  | 28504.44  | 89535.84  | 73086.4   | 87442.61  | 39517.27  |
| 111421.3  | 91056.62  | 32779.1   | 98981.42  | 34480.66  | 34948.84  | 117013.4  | 69876.22  | 96613.32  | 26907.1   |

|           |           |           |           |           |           |           |           |           |           |
|-----------|-----------|-----------|-----------|-----------|-----------|-----------|-----------|-----------|-----------|
| LN230.048 |
| 31153.27  | 86762.93  | 128583.3  | 54319.96  | 108771    | 29888.67  | 38648.62  | 68725.73  | 24486.25  | 150259.2  |
| 25197.09  | 101800.6  | 86045.13  | 48193.95  | 94693.36  | 34089.02  | 25787.12  | 72197.86  | 21823.75  | 151066.4  |
| 43298.98  | 95238.72  | 129136.8  | 46651.3   | 106744.9  | 50808.78  | 28462.72  | 52230.66  | 20047.1   | 123976.9  |
| 24524.35  | 119358.9  | 100727.1  | 45365.44  | 85895.89  | 32030.26  | 27818.71  | 71682.7   | 24567.67  | 123343.2  |
| 26481.17  | 60933.17  | 93316.36  | 64902.33  | 72476.22  | 24537.41  | 28713.56  | 52512.27  | 29456.32  | 161444.8  |

|           |           |           |           |           |           |           |           |           |           |
|-----------|-----------|-----------|-----------|-----------|-----------|-----------|-----------|-----------|-----------|
| LN230.048 |
| 52379.01  | 93003.43  | 57658.78  | 78656.76  | 53930.07  | 110619.2  | 51181.66  | 36803.28  | 19178.94  | 43656.77  |
| 67663.89  | 75648.05  | 72989.73  | 63013.18  | 47427.45  | 89853.68  | 48594.4   | 24271.7   | 27601.29  | 67020.24  |
| 72066.79  | 102374.1  | 67305.7   | 48126.89  | 43436.2   | 110284.2  | 64631.3   | 25985.59  | 25539.22  | 52364.89  |
| 47663.59  | 101575.3  | 66552.04  | 48724.09  | 42852.56  | 136855.3  | 51507.29  | 26136.17  | 22519.49  | 58880.01  |
| 53307.51  | 87400.57  | 65628.56  | 48674.9   | 55787.85  | 100808.9  | 47203.97  | 27354.45  | 21245.55  | 58107.36  |

|           |           |           |           |           |           |           |           |           |           |
|-----------|-----------|-----------|-----------|-----------|-----------|-----------|-----------|-----------|-----------|
| LN230.048 |
| 55697.34  | 35378.99  | 62254.55  | 49398.53  | 61794.87  | 47763.46  | 102042.3  | 61314.25  | 43283.85  | 41537.72  |
| 90714.21  | 38392.56  | 44284.34  | 39865.18  | 46348.76  | 59949.6   | 73299.03  | 68718.01  | 34313.61  | 109063.3  |
| 86505.94  | 36983.38  | 48085.17  | 56474.64  | 56665.14  | 52543.4   | 121211.6  | 54098.72  | 59837.38  | 49968.67  |
| 85261.43  | 65633.34  | 38414.23  | 50152.25  | 51712.09  | 83118.06  | 77565.92  | 74482.19  | 46767.62  | 58106.34  |
| 58736.53  | 57486.83  | 32993.35  | 43219.4   | 68007.27  | 63892.71  | 98991.96  | 66072.56  | 49567.23  | 60501.28  |

|           |           |           |           |           |           |           |           |           |           |
|-----------|-----------|-----------|-----------|-----------|-----------|-----------|-----------|-----------|-----------|
| LN230.048 | LN230.765 | LN230.881 | LN230.955 | LN230.985 | LN230.985 | LN230.985 | LN230.985 | LN230.985 | LN230.985 |
| 37779.97  | 36100.4   | 12198.95  | 27106.22  | 36846.05  | 51471.81  | 42663.6   | 48971.67  | 52704.34  | 40233.5   |
| 76380.08  | 30647.83  | 11257.68  | 27310.43  | 41857.22  | 44010.06  | 39818     | 41729.2   | 40834.09  | 48938.2   |
| 63146.22  | 34134.94  | 13092.15  | 27175.95  | 36560.26  | 34019.52  | 51452.22  | 38386.99  | 48338.34  | 57791.5   |
| 62601.62  | 28335.92  | 10415.1   | 26992.62  | 41531.35  | 40638.71  | 37287.87  | 44253.32  | 44325.11  | 49670     |
| 51931.73  | 30880.93  | 14301.54  | 32159.57  | 36532.19  | 41331.13  | 37257.76  | 44868.91  | 45028.24  | 50992.92  |

|           |           |           |           |           |           |           |           |           |           |
|-----------|-----------|-----------|-----------|-----------|-----------|-----------|-----------|-----------|-----------|
| LN230.985 |
| 51951.45  | 29265.14  | 26870.32  | 46553.52  | 32362.04  | 30532.05  | 26565.06  | 33815.93  | 40079.05  | 40479.07  |
| 44772.01  | 31373.95  | 41226.36  | 33158.56  | 33488.66  | 32014.19  | 24122.86  | 32221.24  | 31831.05  | 34939.55  |
| 38721.83  | 36093.34  | 41489.15  | 29768.49  | 27988.72  | 41617.9   | 43072.94  | 30306.7   | 43957.26  | 44992.1   |
| 43274.57  | 35616.21  | 38937.63  | 34885.65  | 32199.56  | 33083.03  | 29293.6   | 34293.06  | 35795.71  | 39542.14  |
| 43298.42  | 33312.08  | 36877.54  | 38440.64  | 34150.87  | 30620.87  | 26815.63  | 34789.5   | 34653.44  | 37658.5   |

|           |           |           |           |           |           |           |           |           |           |
|-----------|-----------|-----------|-----------|-----------|-----------|-----------|-----------|-----------|-----------|
| LN230.985 | LN230.985 | LN230.985 | LN230.985 | LN230.984 | LN230.985 | LN231.005 | LN231.930 | LN231.931 | LN231.931 |
| 29007.03  | 38561.59  | 26957.38  | 34724.26  | 43424.62  | 36605.77  | 22727.1   | 349496.5  | 882683.3  | 146939.2  |
| 28159.54  | 32755.77  | 27808.05  | 32839.62  | 46472.87  | 36876.94  | 22416.16  | 401393.5  | 1211603   | 195836.3  |
| 31841.04  | 35388.99  | 25880.26  | 33214.9   | 42751.34  | 38946.02  | 23455.04  | 250152.9  | 690829.4  | 213583.8  |
| 27604.56  | 33166.61  | 29030.83  | 32052.18  | 45868.73  | 37147.91  | 21468.38  | 336646.4  | 791585.7  | 165579.2  |
| 28770.63  | 36418.73  | 28163.51  | 34661.58  | 44987.75  | 35474.28  | 23588.55  | 371184.3  | 1013358   | 169430.5  |



|           |           |           |           |           |           |           |           |           |           |
|-----------|-----------|-----------|-----------|-----------|-----------|-----------|-----------|-----------|-----------|
| LN231.931 |
| 210786    | 185331.2  | 170978.5  | 175088.3  | 166527.8  | 165186.6  | 122463.3  | 149715.9  | 220460.9  | 225908.3  |
| 168051.2  | 137467.6  | 143432.7  | 253675.3  | 170204.4  | 149725    | 140495.2  | 188911    | 147453.4  | 176990.2  |
| 164072.6  | 177412.4  | 217772.4  | 235850.4  | 156531.9  | 159239.1  | 156110.9  | 112598.3  | 132476    | 126747    |
| 193112.2  | 148726.7  | 227218.4  | 170506.1  | 175026.8  | 127092.9  | 158846.7  | 148598.4  | 152102.8  | 132407.5  |
| 147931    | 168089.8  | 202599.3  | 216743.3  | 168466.1  | 162905.4  | 122638.4  | 161601.9  | 183236.7  | 174997.9  |

|           |           |           |           |           |           |           |           |           |           |
|-----------|-----------|-----------|-----------|-----------|-----------|-----------|-----------|-----------|-----------|
| LN231.931 |
| 194679    | 167604.1  | 158848.9  | 174066.5  | 188441.3  | 136429.1  | 299009.4  | 162713.5  | 140083.1  | 143036.6  |
| 158571    | 205214.2  | 199999.8  | 162111.8  | 153643.6  | 174713.7  | 176503.1  | 154052.5  | 126944.1  | 234180.8  |
| 126795.2  | 183603.2  | 160658.7  | 149139    | 165454.9  | 126049.4  | 161293.6  | 154170.8  | 204777.7  | 125549.3  |
| 150893.7  | 156738.6  | 159224.8  | 156522.6  | 203624    | 103181.9  | 197673.1  | 183508.8  | 172040.4  | 158422.2  |
| 150392.8  | 109847.6  | 165905    | 239043.6  | 145016.9  | 166189.5  | 196596.7  | 193951.4  | 167020    | 129965.2  |

|           |           |           |           |           |           |           |           |           |           |
|-----------|-----------|-----------|-----------|-----------|-----------|-----------|-----------|-----------|-----------|
| LN231.931 |
| 127652.7  | 147071.6  | 130506.5  | 206953.8  | 116832.4  | 129635.7  | 222491.6  | 151729.4  | 115871.7  | 110503.9  |
| 119433.4  | 193576.5  | 156208.7  | 140509.1  | 146059.3  | 150838.6  | 168120.3  | 188312.4  | 123685.5  | 161039.4  |
| 224381.1  | 177744.1  | 130216.9  | 142181.9  | 209763.4  | 93499.96  | 175711.1  | 100794.2  | 118871.7  | 100818.1  |
| 169529.3  | 120810.1  | 130398.5  | 119501.4  | 181463.1  | 130688.1  | 171177.7  | 144852.9  | 136852.3  | 158077.7  |
| 125867.8  | 167548.6  | 154025.6  | 159167.2  | 208657.8  | 124721.3  | 201465.8  | 129228.5  | 185135.3  | 103245    |

|           |           |           |           |           |           |           |           |           |           |
|-----------|-----------|-----------|-----------|-----------|-----------|-----------|-----------|-----------|-----------|
| LN231.931 |
| 204238.5  | 127104.9  | 192284.2  | 247316.1  | 190770.7  | 140788.7  | 144950.2  | 124314    | 192057.8  | 154598.4  |
| 219616.4  | 190909.5  | 229947.2  | 130541.6  | 150599.6  | 188830.4  | 149256    | 170417.4  | 228206.5  | 185481.6  |
| 209108.4  | 179740.7  | 164174.7  | 135232.8  | 124477.6  | 219848.6  | 135410    | 126338.5  | 165526.8  | 137164.1  |
| 167601.8  | 188463.9  | 150588.2  | 139128.6  | 135609.7  | 200688.4  | 112853    | 178954.9  | 205373    | 137648.1  |
| 170565.1  | 147801.6  | 222476.1  | 196622.3  | 139582.1  | 130892.6  | 149021.4  | 157875.7  | 108418.7  | 159238.3  |

|           |           |           |           |           |           |           |           |           |           |
|-----------|-----------|-----------|-----------|-----------|-----------|-----------|-----------|-----------|-----------|
| LN231.931 |
| 171652.3  | 187992.4  | 195331.4  | 172346.6  | 216463.7  | 138926.3  | 183681.5  | 150655.9  | 214297.2  | 148387.5  |
| 160745.1  | 239531.9  | 178426.1  | 149248.4  | 199969    | 186524.6  | 169033.1  | 118734    | 160055    | 106846.9  |
| 150646.3  | 164944.8  | 277332.2  | 191958.4  | 149980.6  | 118385.2  | 148431.5  | 124723.7  | 132736.4  | 131831.6  |
| 157385.2  | 152230.5  | 265162.8  | 194355.5  | 129103.8  | 144468.3  | 214381    | 139837.5  | 161056    | 123020.7  |
| 131845.2  | 159546.7  | 217283.8  | 150519.3  | 244467.2  | 174599.1  | 166992.5  | 117401.1  | 166660.9  | 108590.7  |

|           |           |           |           |           |           |           |           |           |           |
|-----------|-----------|-----------|-----------|-----------|-----------|-----------|-----------|-----------|-----------|
| LN231.931 |
| 150635    | 140733.7  | 208327.7  | 255254.8  | 137343.6  | 130633.4  | 159076.2  | 136839.1  | 238504.1  | 125548.1  |
| 114936.3  | 151341.6  | 165029.3  | 191240.1  | 191828.2  | 120923.7  | 185962.6  | 165025.3  | 239692.8  | 184517.4  |
| 145672.4  | 124981.9  | 160435    | 173148.9  | 213391.4  | 169341.4  | 150746.5  | 108327.9  | 154820.1  | 136039.9  |
| 104960.2  | 177516.9  | 158316.7  | 192676.9  | 191010.4  | 120293    | 144375.8  | 134376.2  | 202696.2  | 100075.9  |
| 114787.7  | 127748.4  | 157859.2  | 196492.8  | 131160    | 118195.6  | 183874    | 150237.3  | 208717.8  | 102737.4  |

|           |           |           |           |           |           |           |           |           |           |
|-----------|-----------|-----------|-----------|-----------|-----------|-----------|-----------|-----------|-----------|
| LN231.931 |
| 146919.5  | 162858.9  | 208733.2  | 140962.4  | 206597.8  | 113433.9  | 167981.1  | 121635.9  | 155990.8  | 131736.7  |
| 130793.4  | 141459.3  | 262587.2  | 256480.5  | 188217.9  | 159236    | 279866.1  | 127673.5  | 149733.1  | 147408.1  |
| 139086.7  | 185261    | 222182.3  | 176860.6  | 167716.1  | 103402.1  | 151392.9  | 131559.9  | 229165.8  | 111351.1  |
| 142802.7  | 151298.8  | 217576.3  | 255220.2  | 132197.3  | 92207.7   | 148246.6  | 140912.9  | 228798.1  | 132043.5  |
| 123498.9  | 175520    | 264711.3  | 238928.5  | 225433.5  | 180660    | 147865.5  | 147753.7  | 251718.4  | 138447    |

|           |           |           |           |           |           |           |           |           |           |
|-----------|-----------|-----------|-----------|-----------|-----------|-----------|-----------|-----------|-----------|
| LN231.931 |
| 172938.2  | 139057.4  | 175534.3  | 146079.6  | 196599.8  | 158519.9  | 229540.1  | 154718.6  | 171762.3  | 256486.9  |
| 204796.4  | 126771.8  | 159147.1  | 189685.9  | 174492.5  | 221562.7  | 197151.8  | 151671.6  | 163468.6  | 219735    |
| 170237.4  | 112988.1  | 203397.1  | 161216.6  | 190130.3  | 144546.5  | 182562.9  | 192355.6  | 174628.5  | 195813.2  |
| 144474.4  | 224270.1  | 167223.7  | 96630.5   | 149584.8  | 200946.1  | 245931    | 183145.7  | 180712.9  | 233617.6  |
| 163112.2  | 165494.8  | 178187.2  | 136720.3  | 194921.1  | 157859.4  | 200629.3  | 143234.7  | 188659.6  | 210588.4  |



|           |           |           |           |           |           |           |           |           |           |
|-----------|-----------|-----------|-----------|-----------|-----------|-----------|-----------|-----------|-----------|
| LN232.763 | LN232.914 | LN232.930 | LN232.931 | LN232.931 | LN232.932 | LN232.931 | LN232.931 | LN232.932 | LN232.931 |
| 65505.85  | 54858.06  | 50582.21  | 15872.68  | 16351.6   | 43985.52  | 20919.15  | 16602.18  | 43371.79  | 23474.37  |
| 52675.71  | 49699.2   | 44103.29  | 15224.81  | 16068.81  | 45935.95  | 21219.25  | 13409.27  | 45116.02  | 20894.8   |
| 56669.5   | 53880.18  | 37250.52  | 12120.97  | 14757.15  | 48080.41  | 23868.42  | 13748.1   | 39919.41  | 21033.52  |
| 42287.81  | 54251.85  | 42418.37  | 15443.14  | 17496.1   | 50352.47  | 19418.92  | 12306.1   | 37456.72  | 20442.73  |
| 47845.81  | 56931.74  | 34695.56  | 15826.37  | 18297.04  | 46486.04  | 19202.98  | 12749.42  | 37767.54  | 21942.64  |

|           |           |           |           |           |           |           |           |           |           |
|-----------|-----------|-----------|-----------|-----------|-----------|-----------|-----------|-----------|-----------|
| LN232.932 | LN232.931 | LN232.932 | LN232.932 |
| 51099.22  | 42974.3   | 29188.39  | 39180.47  | 34391.96  | 30214.99  | 40975.32  | 33983.89  | 24221.83  | 32084.01  |
| 48792.63  | 45691.02  | 28026.9   | 41332.9   | 36050.42  | 30730     | 39915.33  | 34588.35  | 26529.21  | 31192.76  |
| 47906.78  | 41502.68  | 32654.14  | 38305.15  | 32898.34  | 28562.1   | 36596.21  | 35062.97  | 22901.17  | 32235.19  |
| 47905.05  | 38696.47  | 27231.55  | 41941.07  | 31177.24  | 28208.85  | 38524.24  | 34123.61  | 24033.27  | 27531.12  |
| 48177.91  | 41189.53  | 26926.89  | 41632.51  | 38925.51  | 27387.64  | 36724.77  | 32483.4   | 23888.05  | 27018.68  |

|           |           |           |           |           |           |           |           |           |           |
|-----------|-----------|-----------|-----------|-----------|-----------|-----------|-----------|-----------|-----------|
| LN232.932 | LN232.932 | LN232.932 | LN232.932 | LN232.932 | LN232.931 | LN232.931 | LN232.932 | LN232.931 | LN232.931 |
| 34884.84  | 28174.76  | 28310.65  | 21659.26  | 23464.82  | 52808.19  | 22463.53  | 31966.33  | 23833.95  | 30724.98  |
| 33789.26  | 29627.19  | 29470.95  | 23160.51  | 22608.58  | 56317.5   | 20729.38  | 32378.57  | 23678.25  | 29713.19  |
| 35596.68  | 26884.35  | 26765.84  | 22295.05  | 21493.57  | 52454.46  | 22200.78  | 32587.25  | 24396.85  | 28448.03  |
| 33014.93  | 25984.13  | 24845.81  | 17031.45  | 25376.45  | 51490.26  | 22841.93  | 32519.21  | 22645.69  | 26805.7   |
| 36762.57  | 26522.4   | 28254.04  | 20294.74  | 20690.3   | 52612.06  | 19070.6   | 34056.77  | 25756.57  | 28770.21  |

|           |           |           |           |           |           |           |           |           |           |
|-----------|-----------|-----------|-----------|-----------|-----------|-----------|-----------|-----------|-----------|
| LN232.932 |
| 56528.25  | 22910.58  | 65249.84  | 35150.96  | 42312.72  | 30796.61  | 40743.74  | 43918.77  | 28904.3   | 48792.6   |
| 54542.14  | 20549.26  | 61450     | 34603.06  | 35536.76  | 33367.58  | 40837.57  | 44416.94  | 27364.8   | 45475.13  |
| 52762.49  | 22055.09  | 63283.55  | 35738.74  | 38797.24  | 31764.36  | 36959.94  | 45867.77  | 28726.96  | 47237.15  |
| 49938.15  | 22167     | 60638.2   | 37738.73  | 44042.05  | 31720.78  | 38463.49  | 50129.05  | 25414.92  | 46695.92  |
| 52174.63  | 20848.91  | 54972.36  | 31514     | 41338.97  | 31324.84  | 36359.32  | 42169.25  | 25487.88  | 41996.95  |

|           |           |           |           |           |           |           |           |           |           |
|-----------|-----------|-----------|-----------|-----------|-----------|-----------|-----------|-----------|-----------|
| LN232.932 | LN232.932 | LN232.931 | LN232.932 | LN232.932 | LN232.932 | LN232.932 | LN232.933 | LN232.933 | LN232.933 |
| 43152     | 52204.51  | 22197.06  | 30899.73  | 49294.26  | 59017.17  | 31423.4   | 45604.64  | 45611.61  | 41352.25  |
| 40641.69  | 54292.88  | 22541.18  | 31830.18  | 49366.91  | 57588.55  | 32340.57  | 46228.43  | 45054.22  | 43660.66  |
| 42466.2   | 53248.82  | 23051.27  | 32186.13  | 44362.61  | 56510.53  | 30646.37  | 45549.1   | 42753.15  | 37654.9   |
| 39435.77  | 53179.48  | 20143.03  | 30677.84  | 46261.78  | 52617.64  | 27644.4   | 42601.62  | 43270.38  | 39273.8   |
| 34621.15  | 53409.92  | 21328.89  | 30900.34  | 51564.84  | 51373.2   | 28196.03  | 45202.46  | 39958.41  | 38845.42  |

|           |           |           |           |           |           |           |           |           |           |
|-----------|-----------|-----------|-----------|-----------|-----------|-----------|-----------|-----------|-----------|
| LN232.933 | LN232.933 | LN232.932 | LN232.933 | LN232.933 | LN232.933 | LN232.932 | LN232.933 | LN232.933 | LN232.933 |
| 45718.68  | 45875.11  | 43294.04  | 48407.29  | 42512.98  | 54354.47  | 23753.67  | 39777.53  | 45600.45  | 54659.75  |
| 46254.75  | 48121.09  | 44543.96  | 51949.48  | 44925.15  | 50978.5   | 25456.81  | 38398.94  | 51881.42  | 56966.47  |
| 47678.13  | 41819.83  | 42774.41  | 44126.9   | 45372.72  | 47011.6   | 20678.99  | 43788.78  | 44310.2   | 55635.15  |
| 42060.21  | 45688.75  | 43521.16  | 41010.98  | 40599     | 50025.04  | 22114.32  | 40115.05  | 45277.45  | 56441.66  |
| 40582.79  | 42993.16  | 41053.83  | 43329.93  | 42019.74  | 47111.85  | 22608.37  | 38107.13  | 45312.2   | 55175.42  |

|           |           |           |           |           |           |           |           |           |           |
|-----------|-----------|-----------|-----------|-----------|-----------|-----------|-----------|-----------|-----------|
| LN232.933 | LN232.933 | LN232.933 | LN232.933 | LN232.933 | LN232.933 | LN232.932 | LN232.933 | LN232.933 | LN232.933 |
| 47280.08  | 38313.51  | 33794.06  | 40053.03  | 45607.72  | 44832.57  | 28157.84  | 48990.8   | 67873.8   | 35115.98  |
| 48982.9   | 30946.44  | 33791.51  | 37959.8   | 47173.03  | 44883.98  | 29663.21  | 51032.24  | 65468.61  | 36033.76  |
| 43979.29  | 30915.71  | 34115.99  | 37558.5   | 43841.47  | 43391.77  | 31469.11  | 46851.54  | 68045.06  | 37846.55  |
| 50622.17  | 30476.09  | 33821.17  | 33725.15  | 44536.4   | 40916.56  | 27536.16  | 48755.98  | 62507.12  | 34952.76  |
| 45580.2   | 31446.85  | 30224.78  | 39745.68  | 45233.98  | 42773.72  | 28407.38  | 48922.23  | 64911.57  | 34641.29  |

|           |           |           |           |           |           |           |           |           |           |
|-----------|-----------|-----------|-----------|-----------|-----------|-----------|-----------|-----------|-----------|
| LN232.933 |
| 64298.92  | 46493.81  | 62652.33  | 43429.46  | 55957.25  | 56704.55  | 38248.96  | 39383.22  | 31886.01  | 40079.56  |
| 63945.01  | 45339.59  | 65506.05  | 44044.72  | 55405.67  | 59875.27  | 39731.34  | 41621.33  | 31116.72  | 37005.49  |
| 60958.62  | 50159.8   | 58229.25  | 44755.21  | 55847.85  | 53844.17  | 42993.52  | 34100.44  | 29361.9   | 37857.71  |
| 59604.99  | 47247.86  | 63801.65  | 42923.59  | 54846.49  | 58361.73  | 38257.98  | 33093.57  | 30928.32  | 37420.22  |
| 62312.21  | 46322.98  | 60863.04  | 41654.29  | 56087.25  | 60347.49  | 37822.06  | 36848.26  | 26557.79  | 39374.68  |



|           |           |           |           |           |           |           |           |           |           |
|-----------|-----------|-----------|-----------|-----------|-----------|-----------|-----------|-----------|-----------|
| LN232.933 | LN232.933 | LN232.984 | LN232.984 | LN232.983 | LN232.984 | LN232.983 | LN232.984 | LN232.984 | LN232.984 |
| 43292.57  | 48445.15  | 23908     | 39454.39  | 27995.66  | 27241.66  | 30937.21  | 24921.34  | 17017.89  | 24069.19  |
| 43420.26  | 49561.52  | 27518.31  | 31794.34  | 27540     | 37439.91  | 30084.22  | 23946.32  | 17991.59  | 24023.62  |
| 43379.34  | 50186.19  | 27279.19  | 31413.7   | 28404.4   | 36243.01  | 33270.09  | 25285.34  | 16275.81  | 26677.72  |
| 44120.4   | 45708.63  | 27837.97  | 28402.86  | 28839.16  | 33350.33  | 30589.44  | 24669.71  | 15095.08  | 23176.92  |
| 42448.08  | 49298.4   | 23955.55  | 38148.98  | 33039.75  | 27952.03  | 29937.56  | 24926.73  | 17388.86  | 24265.76  |

|           |           |           |           |           |           |           |           |           |           |
|-----------|-----------|-----------|-----------|-----------|-----------|-----------|-----------|-----------|-----------|
| LN232.984 | LN232.983 | LN232.984 | LN233.154 |
| 23411.9   | 23384.28  | 30636.23  | 97905.93  | 104475.4  | 129782.9  | 133651.7  | 108458.7  | 118745.7  | 89266.38  |
| 22101.83  | 25216.72  | 30098.5   | 85027.81  | 161752.3  | 137475.1  | 88801.51  | 67362.35  | 149028    | 108676.2  |
| 25166.11  | 25215.67  | 29503.9   | 70176.7   | 82177.9   | 96879.2   | 108265.7  | 101091.2  | 128546.7  | 114050.8  |
| 23407.18  | 27598.64  | 32869.28  | 74664.62  | 86373.37  | 107856.1  | 122069.6  | 106440.1  | 147956.5  | 109634.9  |
| 24242.72  | 22474.83  | 30384.9   | 127339.3  | 226715    | 110774.5  | 154734.8  | 149986.4  | 172943.8  | 112468.3  |

|           |           |           |           |           |           |           |           |           |           |
|-----------|-----------|-----------|-----------|-----------|-----------|-----------|-----------|-----------|-----------|
| LN233.154 |
| 142090.3  | 82990.26  | 108724.8  | 88562.49  | 113112.3  | 109338.8  | 95468.36  | 71577.83  | 70308.31  | 59148.23  |
| 165446    | 89467.94  | 97530.34  | 112287.8  | 100278    | 58101.16  | 121125.9  | 78831.13  | 85782.5   | 57919.29  |
| 137865.4  | 89863.46  | 146775.8  | 104808.1  | 105853.7  | 75579.36  | 131720.9  | 85375.96  | 94536.7   | 75668.95  |
| 131721.6  | 125480.8  | 162695.4  | 111050.4  | 114264.1  | 92475.69  | 118254.1  | 96162.76  | 85170.02  | 56516.38  |
| 149058.1  | 148680.6  | 157559.9  | 125249.3  | 104040.9  | 90489.34  | 136715.5  | 102621    | 125430.2  | 92256.24  |

|           |           |           |           |           |           |           |           |           |           |
|-----------|-----------|-----------|-----------|-----------|-----------|-----------|-----------|-----------|-----------|
| LN233.154 |
| 110064    | 64980.97  | 90081.09  | 137554.7  | 73725.69  | 108686.7  | 84158.43  | 98873.52  | 135428.3  | 74735.72  |
| 118048.3  | 61000.36  | 110470.9  | 124809.5  | 90540.3   | 87576.77  | 90268.18  | 96450.41  | 104432.3  | 85208.23  |
| 119429    | 101061.1  | 114846.5  | 145958.6  | 77842.46  | 83386.94  | 119424.9  | 101430.8  | 97056.55  | 67938.4   |
| 137900.2  | 122114.5  | 125140    | 177292.3  | 85756.56  | 107199.8  | 103449.4  | 111091.2  | 85452.29  | 87217.49  |
| 127371.3  | 93930.21  | 176616.3  | 190511    | 107127.3  | 148156.9  | 146215.2  | 168180.2  | 121647    | 125557.6  |

|           |           |           |           |           |           |           |           |           |           |
|-----------|-----------|-----------|-----------|-----------|-----------|-----------|-----------|-----------|-----------|
| LN233.154 |
| 95071.17  | 111652.2  | 114315.8  | 84301.53  | 79382.25  | 52614.53  | 106052.7  | 66636.37  | 89478.95  | 97184.51  |
| 129853.7  | 96802.51  | 109342.4  | 90849.51  | 81203.37  | 53260.79  | 168535.8  | 58734.5   | 80648.14  | 57046.02  |
| 127424.9  | 78748.61  | 91648.89  | 129735.6  | 80811.01  | 49200.06  | 100476.6  | 51318.77  | 70113.72  | 82516.44  |
| 130765.5  | 94042.43  | 115315    | 139683.7  | 75012.34  | 72384.09  | 128356.8  | 64279.2   | 87923.6   | 73207.08  |
| 145693.9  | 127521.5  | 191005.5  | 159433.3  | 75883.36  | 98716.65  | 143099.6  | 90114.36  | 117336.2  | 88481.62  |

|           |           |           |           |           |           |           |           |           |           |
|-----------|-----------|-----------|-----------|-----------|-----------|-----------|-----------|-----------|-----------|
| LN233.154 |
| 107494.7  | 63308.19  | 90839.76  | 115609.3  | 68440.61  | 95772.08  | 105533.5  | 122312.3  | 76817.39  | 113063.6  |
| 103738.1  | 76484.9   | 90639.33  | 89214.47  | 70222.91  | 103034.6  | 96678.43  | 98767.76  | 78420.7   | 95149.35  |
| 90315.77  | 76186.02  | 143756.8  | 85339.54  | 81088.81  | 139033.4  | 135657.7  | 123358.8  | 76993.6   | 106498.3  |
| 115910.5  | 80390.96  | 106177.6  | 90635.37  | 84543.5   | 147965.1  | 135542.3  | 121990.8  | 65572.01  | 107932.8  |
| 179902.5  | 92388.65  | 129252.2  | 165254.1  | 103129.6  | 141021.2  | 135467.8  | 127976.9  | 114790.1  | 138161    |

|           |           |           |           |           |           |           |           |           |           |
|-----------|-----------|-----------|-----------|-----------|-----------|-----------|-----------|-----------|-----------|
| LN233.154 |
| 102126.8  | 129808.6  | 86525.47  | 123215.9  | 101334.8  | 77559.9   | 115124.4  | 52090.04  | 99362.89  | 70229.91  |
| 121640.1  | 82625.12  | 76805.17  | 114057.3  | 119226.4  | 58956.14  | 65017.41  | 69139.04  | 94566.04  | 76749.13  |
| 167324.3  | 79910.59  | 87158.86  | 105669.1  | 106057.4  | 79481.79  | 85243.32  | 51687.63  | 126274.8  | 112615.3  |
| 154608    | 125006.9  | 100285    | 111515.9  | 129743.1  | 76197.56  | 97347.31  | 69095.48  | 99156.74  | 83528.92  |
| 166490.9  | 173691.7  | 151861.4  | 133029.1  | 158617    | 73839.96  | 115621.9  | 122731.2  | 130799.4  | 106381.7  |

|           |           |           |           |           |           |           |           |           |           |
|-----------|-----------|-----------|-----------|-----------|-----------|-----------|-----------|-----------|-----------|
| LN233.154 |
| 88572.77  | 71244.56  | 102957.2  | 67395.17  | 129399.5  | 76455     | 75097.49  | 123720.7  | 82352.12  | 80417.34  |
| 93553.71  | 71186.47  | 125645.6  | 126814.6  | 113863.7  | 63656.94  | 72350.35  | 137884.7  | 127670.6  | 93641.48  |
| 109018.2  | 85364.8   | 156712.7  | 92296.88  | 117770.4  | 79988.02  | 86031.43  | 121290.5  | 74218.15  | 49789.45  |
| 125036.2  | 112418    | 113438.8  | 88967.88  | 117514.9  | 102528.9  | 94985.81  | 140780.8  | 94182.05  | 54832.55  |
| 126174.1  | 110977.5  | 134103.9  | 121637.3  | 146371.2  | 106827.3  | 120783.7  | 141875.4  | 149637.5  | 71028.85  |



|           |           |           |           |           |           |           |           |           |           |
|-----------|-----------|-----------|-----------|-----------|-----------|-----------|-----------|-----------|-----------|
| LN233.154 |
| 88195.46  | 74760.56  | 93295.26  | 88188.82  | 96724.43  | 76206.51  | 119990.7  | 111855.6  | 82248.48  | 99207     |
| 117689.2  | 73693.94  | 71582.76  | 107031.9  | 127526.5  | 89762.37  | 132438.2  | 96533.89  | 78719.23  | 120001.9  |
| 123173.6  | 82007.88  | 109365.3  | 76287.92  | 105297.2  | 126369.6  | 149912.6  | 101352.3  | 81121.97  | 93656.93  |
| 91987.53  | 122259.7  | 92528.87  | 91280.52  | 98879.29  | 85041.01  | 155247.8  | 92689.26  | 85803.49  | 102078    |
| 138629.5  | 109682.9  | 92359.57  | 144122.6  | 147105.2  | 96468.99  | 154096.2  | 116662.3  | 107405.4  | 123446.9  |

|           |           |           |           |           |           |           |           |           |           |
|-----------|-----------|-----------|-----------|-----------|-----------|-----------|-----------|-----------|-----------|
| LN233.154 | LN233.930 | LN234.761 | LN234.999 | LN235.925 | LN235.925 | LN235.925 | LN235.925 | LN235.925 | LN235.925 |
| 68293.43  | 44584.96  | 50759.11  | 16352.27  | 723009.5  | 172840.4  | 113746.9  | 171103.2  | 142400.9  | 124838.4  |
| 75702.06  | 46443.08  | 39543.46  | 17171.45  | 798732    | 149065.4  | 113433.1  | 170265.5  | 189314.5  | 111934.7  |
| 63747.62  | 56614.31  | 39401.71  | 16178.96  | 844292.8  | 148162.7  | 129515.4  | 157826.7  | 244761.3  | 89584.27  |
| 69987.23  | 71150.42  | 31025.37  | 15490.16  | 979569.6  | 105261.2  | 108405.5  | 160488.7  | 179022.5  | 79935.09  |
| 92499.84  | 68256.43  | 36657.33  | 18917.86  | 1072474   | 209022    | 77991.73  | 141165    | 208822.8  | 107760.7  |

|           |           |           |           |           |           |           |           |           |           |
|-----------|-----------|-----------|-----------|-----------|-----------|-----------|-----------|-----------|-----------|
| LN235.925 |
| 137446.6  | 237059.1  | 175801.8  | 132775.9  | 108138.2  | 162859.4  | 68958.26  | 134254.5  | 141746.9  | 154071.8  |
| 154501.4  | 172755.9  | 137138.9  | 138456.7  | 138386.4  | 129357.9  | 72577.42  | 138498.8  | 213580.2  | 158253.9  |
| 114507.6  | 118289.6  | 125810.3  | 148970    | 143004.7  | 162821.6  | 74263.3   | 165044.5  | 179051.4  | 164265.4  |
| 139204.8  | 156525.7  | 118842.2  | 164852.8  | 166809    | 140390.6  | 46529.44  | 150277.4  | 151471.8  | 192221.7  |
| 160876.9  | 102920.5  | 178458.1  | 152107.8  | 134044.1  | 202226    | 97909.79  | 192093.3  | 134941.6  | 111754.3  |

|           |           |           |           |           |           |           |           |           |           |
|-----------|-----------|-----------|-----------|-----------|-----------|-----------|-----------|-----------|-----------|
| LN235.925 |
| 234434.5  | 158043.4  | 179359.1  | 201003    | 203409.3  | 178079.5  | 247494.2  | 155719.5  | 63354.78  | 133604.6  |
| 159279.1  | 146221    | 156240.6  | 269030.9  | 185549.9  | 226975.3  | 163016.5  | 169527.5  | 74947.37  | 122140.6  |
| 184934.9  | 130596.7  | 174196.3  | 176359.9  | 204867.2  | 227613.4  | 153936.8  | 209838.5  | 69152.25  | 136497.3  |
| 185665.9  | 164211.2  | 149602.3  | 224145.7  | 189962.9  | 218162.9  | 179034.1  | 177699.3  | 73670.67  | 115066.5  |
| 163878.2  | 160489    | 138426.7  | 172201.1  | 179246    | 154178.3  | 258833.7  | 176861.8  | 78039.82  | 188091.6  |

|           |           |           |           |           |           |           |           |           |           |
|-----------|-----------|-----------|-----------|-----------|-----------|-----------|-----------|-----------|-----------|
| LN235.925 |
| 201547.2  | 134186.3  | 131716.9  | 177633.1  | 156477    | 160328.3  | 110368.6  | 79151.19  | 226283    | 187269.5  |
| 145349    | 191206.1  | 150225.8  | 210585.7  | 202503.9  | 179294.2  | 150316.4  | 55366.67  | 139141.7  | 199929.4  |
| 162868.2  | 182713.4  | 178066.2  | 132233.4  | 149899.1  | 170317.6  | 177687.4  | 86477.3   | 187850.4  | 171997    |
| 157052    | 128240.3  | 187326.7  | 111456.3  | 173164.8  | 105900.8  | 101673    | 71630.5   | 256374.6  | 150673.1  |
| 139496.6  | 159214.3  | 147663.5  | 162735.2  | 139031.6  | 110174    | 157033.8  | 82137.05  | 150484.5  | 147305.8  |

|           |           |           |           |           |           |           |           |           |           |
|-----------|-----------|-----------|-----------|-----------|-----------|-----------|-----------|-----------|-----------|
| LN235.925 |
| 181715.4  | 157531.2  | 202948.9  | 145299.5  | 163220.3  | 99546.55  | 262349.1  | 115919.1  | 155344.7  | 186355.1  |
| 220065.3  | 224310.9  | 147967.4  | 135833.8  | 158038.8  | 161274.8  | 156753.8  | 184169.5  | 144669.6  | 145434.2  |
| 213322    | 154394.5  | 130654.7  | 188625.7  | 201782.5  | 136243.9  | 179326.6  | 151317.3  | 172367.1  | 170923.2  |
| 160643.4  | 114530.5  | 180353.2  | 178885.5  | 166207.4  | 173450.1  | 125590    | 123725.1  | 116209.1  | 210977    |
| 205303.9  | 137616.9  | 128815.1  | 146444.6  | 221008.8  | 128050.7  | 171894.2  | 191969.1  | 152343.2  | 118227.2  |

|           |           |           |           |           |           |           |           |           |           |
|-----------|-----------|-----------|-----------|-----------|-----------|-----------|-----------|-----------|-----------|
| LN235.925 |
| 216482.7  | 134831.6  | 141841.8  | 142503.3  | 186631.1  | 210127.5  | 179037    | 149204.8  | 158968.3  | 165886.3  |
| 212594.8  | 167245.7  | 105071.1  | 187680.3  | 127711.3  | 207822.4  | 172150.4  | 172386.7  | 151402.8  | 178772.9  |
| 246393.3  | 155601.3  | 134564.2  | 139715.3  | 114951.6  | 187038.6  | 144581.6  | 165214.9  | 163997.1  | 141138.4  |
| 175684.6  | 127112    | 143461.3  | 121832.6  | 129310.1  | 186897.5  | 202256.3  | 151137.4  | 113614.9  | 160351    |
| 222392.7  | 150821.5  | 153007.9  | 164158.9  | 172683.7  | 182557.7  | 192479.1  | 128450.7  | 134450.7  | 143701    |

|           |           |           |           |           |           |           |           |           |           |
|-----------|-----------|-----------|-----------|-----------|-----------|-----------|-----------|-----------|-----------|
| LN235.925 |
| 189939.5  | 123768.8  | 142440.2  | 153178.8  | 135673.4  | 51628.65  | 116867.9  | 74269.88  | 195575    | 141179.9  |
| 138750.1  | 174595.2  | 174648.7  | 158155.4  | 201766.2  | 55536.03  | 144412.3  | 65730.8   | 172842.2  | 162702.1  |
| 188789.6  | 135706.8  | 198592.9  | 141437.3  | 155629    | 76671.17  | 189140.2  | 71243.71  | 239029.3  | 152000    |
| 133733.9  | 137556.8  | 153839.6  | 120229.5  | 196238.2  | 52743.61  | 225564.8  | 61875.22  | 211739.1  | 167334.1  |
| 173780    | 169795.8  | 146344.1  | 170211.1  | 164076    | 69742.19  | 131889.3  | 65492.23  | 136722    | 115736    |



|           |           |           |           |           |           |           |           |           |           |
|-----------|-----------|-----------|-----------|-----------|-----------|-----------|-----------|-----------|-----------|
| LN235.925 |
| 181630.6  | 190603.1  | 196415.1  | 259994.3  | 185967.6  | 209331.9  | 163991.3  | 147804    | 170617.7  | 155018.2  |
| 166005.5  | 152245.5  | 184947.2  | 189227.7  | 157030.8  | 161543.5  | 153678.7  | 167796.7  | 169811.9  | 190230.9  |
| 160267.9  | 161668.4  | 228949.1  | 153693.2  | 174571    | 141186.7  | 233624.1  | 185912.9  | 163868.5  | 230355.6  |
| 177814.3  | 121966.1  | 151442.7  | 159643.6  | 160684.2  | 181769.5  | 114495.8  | 168429    | 164325.5  | 155720.6  |
| 283142.8  | 156542.4  | 142026.1  | 173890.1  | 148505.6  | 191626.7  | 163062.6  | 199858    | 137722.6  | 142889.9  |

|           |           |           |           |           |           |           |           |           |           |           |
|-----------|-----------|-----------|-----------|-----------|-----------|-----------|-----------|-----------|-----------|-----------|
| LN235.925 | LN236.928 | LN236.978 | LN236.978 |
| 150742.4  | 161452.4  | 156403    | 173580.8  | 181175.5  | 179350.4  | 175711.7  | 17653.58  | 49819.8   | 55420.62  |           |
| 175104.1  | 162566.1  | 154124.1  | 178655.4  | 187836    | 164230.7  | 128906.5  | 16454.33  | 42250.61  | 66364.97  |           |
| 180165.4  | 176402.1  | 155318    | 137112.1  | 185458.2  | 162561    | 151896.4  | 16658.59  | 45455.36  | 62128.76  |           |
| 159391.3  | 160284.4  | 171385.7  | 126110.4  | 201294.8  | 201326.3  | 177654.7  | 22228.17  | 44481.7   | 54161.55  |           |
| 170973.8  | 216305.2  | 171496.3  | 184431    | 183778    | 212318.5  | 116244.9  | 25202.44  | 45375.05  | 56284.31  |           |

|           |           |           |           |           |           |           |           |           |           |
|-----------|-----------|-----------|-----------|-----------|-----------|-----------|-----------|-----------|-----------|
| LN236.978 | LN236.978 | LN236.978 | LN236.979 | LN236.979 | LN236.979 | LN236.978 | LN236.978 | LN236.979 | LN236.979 |
| 37872.1   | 38772.27  | 55344.26  | 53735.87  | 29116.76  | 32792.17  | 34081.12  | 54623.04  | 30542.44  | 31160.56  |
| 30679.92  | 37234.93  | 51875.56  | 52078.2   | 27993.46  | 34622.27  | 35962.67  | 60459.39  | 33804.33  | 33261.5   |
| 32594.07  | 38213.51  | 53454.38  | 51477.83  | 28763.36  | 33761.21  | 37310.45  | 57176.88  | 30203.98  | 34898.09  |
| 31552.69  | 36431.62  | 52008.64  | 54237.64  | 28177.57  | 34670.06  | 34135     | 56783.76  | 30249.84  | 30241.88  |
| 33225.6   | 41528.17  | 56817.96  | 52267.39  | 27389.11  | 35982.62  | 35298.52  | 57694.01  | 32803.53  | 31333.12  |

|           |           |           |           |           |           |           |           |           |           |
|-----------|-----------|-----------|-----------|-----------|-----------|-----------|-----------|-----------|-----------|
| LN236.978 | LN236.978 | LN236.979 | LN236.979 | LN236.978 | LN236.978 | LN236.979 | LN236.979 | LN236.978 | LN238.915 |
| 35030.31  | 25757.39  | 32184.49  | 27565.26  | 46895.98  | 29598.64  | 35930.63  | 29899.62  | 20031.23  | 15196.73  |
| 40481.96  | 26566.58  | 33228.04  | 25574.08  | 49839.26  | 25848.66  | 40395.45  | 26675.32  | 20608.22  | 10878.03  |
| 36504.35  | 31134.54  | 28504.51  | 22861.95  | 52149.71  | 28152.48  | 37684.86  | 33172.87  | 20062.46  | 14144.92  |
| 38065.4   | 29906.68  | 31731.09  | 28448.54  | 44741.87  | 27844.23  | 38141.79  | 35312.91  | 21897.64  | 13874.97  |
| 40377.49  | 28486.44  | 29396.72  | 27215.43  | 48059.79  | 25658.19  | 35383.52  | 27638.1   | 22782.75  | 13619.67  |

|           |           |           |           |           |           |           |           |           |           |
|-----------|-----------|-----------|-----------|-----------|-----------|-----------|-----------|-----------|-----------|
| LN238.931 |
| 134669.7  | 130156.9  | 90551.01  | 169190.6  | 184593.3  | 184912.6  | 229643.2  | 265644.7  | 215955    | 179768    |
| 102966.3  | 118451.1  | 85408.11  | 151465.7  | 125238.7  | 259550.6  | 169795.1  | 156744.6  | 186564    | 241867.9  |
| 128028.6  | 108370.2  | 87593.31  | 129720.6  | 143103.1  | 208239.7  | 177009.7  | 162694.2  | 185453.4  | 184005.7  |
| 101939.9  | 121740.8  | 80143.08  | 143340.9  | 146477.9  | 248788.6  | 161828.2  | 167487.1  | 173223.2  | 220019.5  |
| 128322.2  | 114038.5  | 84177.14  | 156970.7  | 150958.6  | 228267.9  | 194565.2  | 155875.5  | 291264.3  | 230168.2  |

|           |           |           |           |           |           |           |           |           |           |
|-----------|-----------|-----------|-----------|-----------|-----------|-----------|-----------|-----------|-----------|
| LN238.931 |
| 210362.7  | 85482.1   | 147856    | 211573.3  | 158935.6  | 163782.7  | 164047.5  | 125914    | 164620.5  | 121142.4  |
| 210634.1  | 80034.74  | 160576.1  | 209140.9  | 151277.2  | 152655.6  | 158438.9  | 131225.3  | 149432.5  | 112922.1  |
| 304478    | 110941.8  | 123778    | 227037.4  | 165403.9  | 189237.4  | 131740.6  | 121779.6  | 206183.1  | 177234    |
| 195465    | 77917.42  | 147422.7  | 192862.5  | 185357.9  | 167729.4  | 161087.7  | 116468.3  | 142622.3  | 108197.8  |
| 209161.3  | 102512.6  | 133144.7  | 206911.5  | 170602.6  | 157164.2  | 211309.9  | 158903.9  | 175888.4  | 161729.3  |

|           |           |           |           |           |           |           |           |           |           |
|-----------|-----------|-----------|-----------|-----------|-----------|-----------|-----------|-----------|-----------|
| LN238.931 |
| 187234.9  | 110100.1  | 189719.8  | 205738.5  | 76859.37  | 151164.4  | 167425.2  | 183707.2  | 147423.7  | 262846.8  |
| 190102    | 105356.3  | 193303.5  | 165012.8  | 113957    | 145919.2  | 171110.6  | 206076.2  | 154294.6  | 224208.3  |
| 213457.2  | 104161.9  | 219224.8  | 196226.8  | 113056.4  | 185175.7  | 179162.3  | 188730.1  | 172176.5  | 167641.6  |
| 165564.4  | 121125.6  | 180884.6  | 158577.3  | 102936.7  | 149451.2  | 168385.7  | 188617.7  | 150090.3  | 207836.2  |
| 246669.1  | 128178.7  | 244742.3  | 183895.9  | 99490.52  | 170895.8  | 181613.3  | 178136.8  | 176378.5  | 233693.2  |

|           |           |           |           |           |           |           |           |           |           |
|-----------|-----------|-----------|-----------|-----------|-----------|-----------|-----------|-----------|-----------|
| LN238.931 |
| 206586.7  | 145255.8  | 180817.7  | 83178.95  | 164770.6  | 207961    | 179988    | 170772.8  | 187428.3  | 191645.5  |
| 168106.9  | 134684.7  | 182913.1  | 92718.02  | 164819.4  | 182699.9  | 182363    | 155692.6  | 214716.6  | 165475.5  |
| 182701.2  | 138713.5  | 185331.9  | 72563.7   | 169821.4  | 179018    | 174879.5  | 150690.9  | 231214.7  | 180779.6  |
| 158579.6  | 149001.1  | 170575.7  | 79935.02  | 168617.6  | 181700.2  | 176198.4  | 151578.5  | 206832.7  | 165732.5  |
| 162521.5  | 153292.2  | 174130.3  | 129997.4  | 227238    | 165427.2  | 185420.3  | 203418.5  | 213641.4  | 160177.3  |



|           |           |           |           |           |           |           |           |           |           |
|-----------|-----------|-----------|-----------|-----------|-----------|-----------|-----------|-----------|-----------|
| LN238.931 |
| 287335.6  | 134282.1  | 87353.97  | 132444.5  | 160062.1  | 109993.5  | 119285.8  | 164024.9  | 105636.4  | 131630.4  |
| 180134.5  | 136983.2  | 94117.59  | 127452.7  | 156781.2  | 112256.1  | 93527.6   | 164975.8  | 100453.4  | 123778    |
| 171561.7  | 166515.6  | 140633.2  | 157163.1  | 168230.9  | 108946.5  | 92986.65  | 147963.8  | 111431.1  | 134536.6  |
| 186338.2  | 134032    | 100992.4  | 123683.5  | 147171.2  | 112460.3  | 96663.26  | 172761.7  | 111397.3  | 116927.6  |
| 175770.3  | 129886.2  | 96290.63  | 117963.7  | 129659.3  | 112261.9  | 86214.15  | 150179.2  | 125988.3  | 119906.5  |

|           |           |           |           |           |           |           |           |           |           |
|-----------|-----------|-----------|-----------|-----------|-----------|-----------|-----------|-----------|-----------|
| LN238.931 |
| 167622.5  | 89167.66  | 137763.2  | 149103.5  | 86737.62  | 101003.7  | 151134.2  | 94737.37  | 206921.7  | 131442.1  |
| 106706.5  | 87223.17  | 137653.5  | 90741.99  | 140599.6  | 116414.2  | 153034.5  | 99240.05  | 203054.7  | 119779.5  |
| 110334    | 100237.1  | 139539.8  | 83043.15  | 89779.03  | 144136.5  | 194100.3  | 95439.36  | 189739    | 154460.4  |
| 101592.9  | 93070.7   | 128204.9  | 97602.46  | 89351.47  | 113932.8  | 143108.6  | 94749.91  | 210803.4  | 125039.1  |
| 104374.6  | 105401    | 152028.9  | 94968.22  | 76557.99  | 107015.9  | 162603.5  | 90383.22  | 205669    | 116813.8  |

|           |           |           |           |           |           |           |           |           |           |
|-----------|-----------|-----------|-----------|-----------|-----------|-----------|-----------|-----------|-----------|
| LN238.931 |
| 109840    | 103675.2  | 111976.1  | 105638.9  | 142304.3  | 91768.91  | 54243.17  | 56714.39  | 40652.05  | 28954.06  |
| 112221.8  | 105197.1  | 125307.3  | 106225.5  | 142904.7  | 95551.21  | 57570     | 55674.46  | 37004.35  | 30819.88  |
| 107060.4  | 131948.3  | 131794.4  | 104846.2  | 135814.8  | 91855.42  | 60339.27  | 52410.71  | 41506.72  | 29240.71  |
| 114983.7  | 98799.76  | 115420.4  | 109427.9  | 145907.6  | 87954.29  | 52439.2   | 50541.89  | 37129.48  | 27031.14  |
| 101540.3  | 79901.98  | 111603    | 99590.93  | 137088.3  | 90359.85  | 54154.12  | 49324.36  | 36925.13  | 39965.93  |

|           |           |           |           |           |           |           |           |           |           |
|-----------|-----------|-----------|-----------|-----------|-----------|-----------|-----------|-----------|-----------|
| LN238.931 | LN238.994 | LN238.994 | LN238.994 |
| 45824.82  | 49759.71  | 39682.05  | 25242.38  | 34036.43  | 53484.04  | 14187.8   | 42356.3   | 63406.09  | 42334.7   |
| 42291.55  | 48036.03  | 41320.1   | 25282.28  | 34489.04  | 54826.77  | 14633.11  | 48951.1   | 80090.36  | 40772.39  |
| 39252.09  | 58593.89  | 36490.93  | 27551.58  | 31000.55  | 53373.25  | 13794.33  | 44732.62  | 60138.4   | 41813.3   |
| 37858.38  | 49742.9   | 37230.92  | 24655.53  | 27555.39  | 47940.07  | 12313.06  | 48348.35  | 61510.78  | 43288.92  |
| 37000.59  | 41809.2   | 39924.82  | 23929.65  | 27255.98  | 49727.5   | 11239.16  | 46476.94  | 59635.74  | 40926.72  |

|           |           |           |           |           |           |           |           |           |           |
|-----------|-----------|-----------|-----------|-----------|-----------|-----------|-----------|-----------|-----------|
| LN238.994 | LN239.059 |
| 41583.18  | 36668.43  | 52486.49  | 50234.43  | 30279.39  | 46807.17  | 39534.74  | 41147.1   | 46405.9   | 25406.76  |
| 45840.31  | 41846.48  | 46435.73  | 48593.54  | 27134.21  | 44495.28  | 35045.07  | 38667.94  | 47759.59  | 29757.34  |
| 40017.42  | 39063.79  | 48520.1   | 46298.92  | 30400.89  | 44097.77  | 36387.47  | 46165.89  | 41278.79  | 42574.97  |
| 43030.2   | 35447.73  | 44125.49  | 48957.47  | 26867.7   | 46421.29  | 36490.44  | 37441.74  | 48294.62  | 47367.25  |
| 44707.25  | 36744.72  | 48285.3   | 51442.94  | 26226.53  | 43120.09  | 33488.75  | 41627.6   | 43010.14  | 47960.95  |

|           |           |           |           |           |           |           |           |           |           |
|-----------|-----------|-----------|-----------|-----------|-----------|-----------|-----------|-----------|-----------|
| LN239.059 |
| 21846.38  | 26833.77  | 17087.47  | 13217.97  | 12552.62  | 9140.011  | 16052.48  | 17848.85  | 11528.59  | 13051.24  |
| 26776.59  | 32185.01  | 17509.31  | 13786.43  | 12212.63  | 10407.41  | 17158.02  | 19125.36  | 12851.24  | 11860.02  |
| 38042.6   | 46975.28  | 21015.79  | 19006.69  | 16148.56  | 14880.59  | 20926.21  | 16794.25  | 12043.71  | 14073.57  |
| 43764.38  | 50705.06  | 23342.03  | 18946.6   | 19648.73  | 17062.79  | 23975.23  | 17341.43  | 11680.16  | 14601.89  |
| 45891.13  | 56024.6   | 24646.52  | 19957.21  | 19822.12  | 17403.84  | 23905.05  | 15086.68  | 12878.62  | 14609.38  |

|           |           |           |           |           |           |           |           |           |           |
|-----------|-----------|-----------|-----------|-----------|-----------|-----------|-----------|-----------|-----------|
| LN239.059 | LN239.059 | LN239.059 | LN239.059 | LN239.059 | LN239.059 | LN239.076 | LN239.076 | LN239.076 | LN239.076 |
| 14967.47  | 17234.67  | 17039.37  | 24386.66  | 16298.31  | 15198.89  | 17157.19  | 16587.32  | 23885.01  | 19867.93  |
| 15321.38  | 16152.57  | 15474.8   | 28240.97  | 16195.17  | 15946.33  | 19073.38  | 17152.64  | 18396.75  | 16919.62  |
| 16034.84  | 18093.93  | 17434.76  | 32039.33  | 20320.92  | 13774.24  | 19497.15  | 15997.39  | 19380.27  | 18272.16  |
| 16946.62  | 19596.33  | 17188.11  | 33613.98  | 24781.38  | 14542.21  | 20164.04  | 15181.59  | 19199.77  | 19263.61  |
| 16817.49  | 18425.62  | 15079.69  | 36721.26  | 26406.23  | 14236.21  | 19224.69  | 15416.03  | 19594.81  | 17890.57  |

|           |           |           |           |           |           |           |           |           |           |
|-----------|-----------|-----------|-----------|-----------|-----------|-----------|-----------|-----------|-----------|
| LN239.076 | LN239.076 | LN239.076 | LN239.902 | LN239.949 | LN240.910 | LN240.927 | LN240.928 | LN240.928 | LN240.928 |
| 18375.64  | 14584.98  | 16365.72  | 20281.42  | 18891.28  | 302903    | 57516.76  | 67246.69  | 79951.61  | 58757.24  |
| 17233.37  | 15704.67  | 15371.19  | 16483.66  | 19041.94  | 263888    | 59597.62  | 65602.04  | 68127.73  | 57561.57  |
| 18257.6   | 15884.47  | 14653.32  | 20028.92  | 18105.16  | 236748.8  | 61964.06  | 74398.36  | 74802.26  | 61709.78  |
| 18950.32  | 14592.29  | 14959.79  | 19575.9   | 20304.36  | 397606.5  | 58580.42  | 64205.62  | 70391.56  | 57214.78  |
| 18335.26  | 15289.12  | 14081.77  | 22415.25  | 21269.27  | 366994.3  | 55460.98  | 61673     | 71025.93  | 60324.52  |



|           |           |           |           |           |           |           |           |           |           |
|-----------|-----------|-----------|-----------|-----------|-----------|-----------|-----------|-----------|-----------|
| LN240.928 |
| 57348.44  | 49101.73  | 58938.75  | 58145.36  | 49651.8   | 47661.4   | 46104.01  | 32748.56  | 39799.88  | 57135.29  |
| 48683.58  | 45639.51  | 63725.03  | 62350     | 54325.35  | 40327.51  | 49756.51  | 31217.78  | 37329.82  | 57630.2   |
| 51536.85  | 46777.22  | 61176.28  | 57533.16  | 46474.29  | 48950.37  | 43836.28  | 32677.29  | 34969.51  | 55013.17  |
| 52746.43  | 48814.57  | 63360.43  | 61871.48  | 47784.49  | 41286.69  | 46097.63  | 33365.42  | 32661.81  | 52333.38  |
| 53683.55  | 43421.99  | 56576.28  | 58561.95  | 49333.95  | 47400.82  | 46130.88  | 29928.02  | 32911.48  | 55619.3   |

|           |           |           |           |           |           |           |           |           |           |
|-----------|-----------|-----------|-----------|-----------|-----------|-----------|-----------|-----------|-----------|
| LN240.928 | LN240.928 | LN240.929 | LN240.928 | LN240.928 | LN240.928 | LN240.928 | LN240.928 | LN240.928 | LN241.01_ |
| 68709.28  | 58139.58  | 64573.83  | 48796.15  | 61018.29  | 47215.31  | 47958.22  | 77879.29  | 42202.81  | 47115.25  |
| 65743.36  | 52479.05  | 64719.31  | 48219.28  | 67772.3   | 47222.94  | 45823.46  | 78365.68  | 47684.01  | 101090.2  |
| 66943.49  | 58644.46  | 65337.27  | 48212.5   | 61943.15  | 45275.87  | 49195.57  | 78437.96  | 45678.67  | 49120.92  |
| 61540.26  | 57789.17  | 64808.12  | 46524.69  | 61223.53  | 47306.25  | 45873.08  | 74087.06  | 41557.32  | 54693.98  |
| 67705.59  | 52048.43  | 60417.38  | 53241.72  | 58929.18  | 45630.94  | 46965.55  | 75143.16  | 41769.99  | 45098.68  |

| LN241.01_ | LN241.01_ | LN241.010 |
|-----------|-----------|-----------|-----------|-----------|-----------|-----------|-----------|-----------|-----------|
| 64651.97  | 37093.83  | 62650.08  | 67566.15  | 47580.94  | 54871     | 54584.9   | 42014.73  | 62912.6   | 48507.08  |
| 40961.95  | 41018.61  | 59408.84  | 63243.8   | 47489.4   | 61049.14  | 72312.54  | 42023.42  | 69159.71  | 53920.37  |
| 60322.88  | 31330.56  | 57029.55  | 74416.53  | 48047.97  | 62694.2   | 52712.38  | 47331.08  | 72574.34  | 54535.95  |
| 66734.89  | 32323.66  | 56830.7   | 60937.86  | 47121.55  | 62426.03  | 54920.83  | 43207.84  | 63485.29  | 52745.38  |
| 63156.67  | 37366.54  | 53013.09  | 71648.98  | 50849.54  | 53841.76  | 52745.99  | 47533.37  | 72737.01  | 53372.55  |

|           |           |           |           |           |           |           |           |           |           |
|-----------|-----------|-----------|-----------|-----------|-----------|-----------|-----------|-----------|-----------|
| LN241.009 | LN241.010 | LN241.010 | LN241.01_ | LN241.010 | LN241.010 | LN241.009 | LN241.010 | LN241.010 | LN241.01_ |
| 43599.28  | 46664.35  | 41687.56  | 50365.29  | 51048.78  | 36565.58  | 36445.88  | 29931.94  | 23018.96  | 39456.59  |
| 47707.94  | 57694.61  | 48703.04  | 35047.77  | 50926.04  | 34172.74  | 38088.11  | 34091.38  | 32369.97  | 39130.62  |
| 44858.21  | 55240.97  | 44616.59  | 53360.04  | 49172.84  | 35288.79  | 34790.39  | 31181.29  | 27069.13  | 40595.62  |
| 45738.34  | 57850.84  | 46739.53  | 49835.34  | 48643.63  | 36086.16  | 37257.33  | 30889.6   | 26304.68  | 41539.08  |
| 42569.68  | 51511.86  | 44757.28  | 47188.08  | 46085.95  | 35043.85  | 33108.54  | 31224.32  | 24193.38  | 42333.93  |

|           |           |           |           |           |           |           |           |           |           |
|-----------|-----------|-----------|-----------|-----------|-----------|-----------|-----------|-----------|-----------|
| LN241.010 | LN241.01_ | LN241.01_ | LN241.01_ | LN241.010 | LN241.010 | LN241.010 | LN241.010 | LN241.010 | LN241.009 |
| 40305.13  | 44259.12  | 40649.95  | 34854.53  | 38894.9   | 31420.56  | 28365.09  | 29923.63  | 36777.77  | 48909.49  |
| 45152.58  | 40566.58  | 37403.45  | 34413.99  | 38616.54  | 30364.4   | 32040.12  | 31108.35  | 36550.4   | 58294.6   |
| 41694.85  | 39320.53  | 37745.75  | 34091.89  | 35862.89  | 34517.88  | 30571.74  | 31313.55  | 39531.15  | 42831.77  |
| 38300.73  | 41173.42  | 39650.31  | 35730.39  | 38780.43  | 31820.93  | 32562.4   | 27377.19  | 37224.36  | 45613.11  |
| 38425.15  | 41783.96  | 42576.72  | 37071.23  | 39564.7   | 32513.13  | 29143.64  | 30494.64  | 35129.3   | 53962.8   |

|           |           |           |           |           |           |           |           |           |           |
|-----------|-----------|-----------|-----------|-----------|-----------|-----------|-----------|-----------|-----------|
| LN241.010 |
| 14836.47  | 22190.04  | 22660.79  | 15618.18  | 24943.66  | 28797.81  | 23733.09  | 32529.28  | 30081.19  | 15188.54  |
| 19050.68  | 20026.75  | 22978.86  | 15633.45  | 28621.67  | 26710.51  | 24944.91  | 33948.76  | 24969     | 15712.7   |
| 16388.93  | 20931.03  | 20022.87  | 12167.22  | 21599.67  | 24437.19  | 23053.41  | 31027.48  | 27945.73  | 16125.01  |
| 17474.08  | 20220.01  | 20802.58  | 13365.7   | 24798.49  | 29471.99  | 24084.89  | 34532.77  | 25944.13  | 16165.73  |
| 18221.43  | 18087.3   | 19899.78  | 14250.69  | 23169.56  | 27850.8   | 23560.16  | 27414.65  | 25892.08  | 14821.82  |

|           |           |           |           |           |           |           |           |           |           |
|-----------|-----------|-----------|-----------|-----------|-----------|-----------|-----------|-----------|-----------|
| LN241.010 |
| 16520.99  | 36145.2   | 35203.87  | 35809.77  | 19426.61  | 14037.08  | 24937.32  | 17976.59  | 24531.6   | 14076.98  |
| 17046.7   | 36650.59  | 38617.45  | 31816.1   | 22735.84  | 13430.71  | 26894.65  | 19547.04  | 28250.33  | 14003.06  |
| 17769.55  | 33819.08  | 37824.54  | 36533.38  | 19951.82  | 12601.28  | 24964.89  | 19337.96  | 24326.42  | 12493.02  |
| 17187.88  | 39052.79  | 35048.76  | 32400.61  | 19593.53  | 13532.13  | 21847.18  | 18491.34  | 27614.82  | 12420.1   |
| 18291.23  | 34277.05  | 35794.05  | 35151.32  | 18845.14  | 12890.74  | 24949.74  | 18123.11  | 25944.51  | 12420.22  |

|           |           |           |           |           |           |           |           |           |           |
|-----------|-----------|-----------|-----------|-----------|-----------|-----------|-----------|-----------|-----------|
| LN241.010 |
| 21293.97  | 30418.91  | 25159.93  | 12613.83  | 29875.67  | 17452.88  | 23226.06  | 24090.58  | 33672.64  | 23121.28  |
| 21535.72  | 31375.65  | 26808.31  | 13572.08  | 29682.44  | 16224.44  | 21661.27  | 23245.12  | 29974.19  | 25288.65  |
| 20455.33  | 31722.05  | 25472.9   | 12619.3   | 30475.81  | 13389.64  | 23264.35  | 23773.26  | 29106.62  | 24026.7   |
| 19696.26  | 31352.84  | 25455.09  | 12360.96  | 30709.94  | 13623.83  | 23002.72  | 21612.72  | 29280.6   | 23153.5   |
| 19342.36  | 30046.32  | 24874.36  | 12987.72  | 32123.02  | 14120.39  | 22914.4   | 22884.91  | 26176.23  | 24377.64  |



|           |           |           |           |           |           |           |           |           |           |
|-----------|-----------|-----------|-----------|-----------|-----------|-----------|-----------|-----------|-----------|
| LN241.010 | LN241.009 | LN241.010 |
| 26116.73  | 64138.22  | 28733.97  | 33866.67  | 16231.58  | 35023.92  | 13365.22  | 32011.82  | 19281.35  | 21420.41  |
| 27485.04  | 68150.41  | 31696.9   | 34206.99  | 15325.6   | 36671.83  | 15589.7   | 33197.75  | 17022.81  | 23538.96  |
| 26262.28  | 64881.99  | 29231.86  | 34286.25  | 15957.97  | 34768.91  | 14077.66  | 32523.54  | 19860.5   | 20681.46  |
| 26751.27  | 67116.5   | 28907.74  | 34114.25  | 15081.83  | 40340.83  | 14979.19  | 35862.3   | 19918.43  | 20810.05  |
| 24030.24  | 62443.5   | 28813.29  | 33697.84  | 16466.04  | 34137.04  | 12773.06  | 32962.06  | 21338.26  | 23319.1   |

|           |           |           |           |           |           |           |           |           |           |
|-----------|-----------|-----------|-----------|-----------|-----------|-----------|-----------|-----------|-----------|
| LN241.010 | LN241.009 | LN241.010 |
| 35142.44  | 26027.76  | 51445.02  | 20414.85  | 20417.67  | 22090.1   | 14427.6   | 15006.36  | 21152.04  | 12679.79  |
| 31553.55  | 24408.62  | 52383.3   | 21442.1   | 21850.65  | 21766.45  | 17862.16  | 15737.84  | 23843.6   | 12843.62  |
| 36085.71  | 22540.69  | 49980.26  | 17443.22  | 22366.79  | 20532.14  | 16394.68  | 15132.17  | 20518.43  | 13896.09  |
| 32391.77  | 25484.64  | 47328.78  | 18718.41  | 20310.38  | 21027.82  | 15864     | 13650.68  | 20868.07  | 10969.17  |
| 33810.92  | 24697.22  | 51482.31  | 20063.33  | 21370.35  | 22394.02  | 15269.56  | 15284.77  | 22159.97  | 11460.43  |

|           |           |           |           |           |           |           |           |           |           |
|-----------|-----------|-----------|-----------|-----------|-----------|-----------|-----------|-----------|-----------|
| LN241.010 | LN241.010 | LN241.056 | LN241.056 | LN241.056 | LN241.056 | LN241.056 | LN241.910 | LN242.887 | LN242.942 |
| 29483.93  | 27898.84  | 17033.29  | 18382.7   | 18905.19  | 16234.28  | 18322.86  | 19999.07  | 32642.17  | 365205.4  |
| 28377.68  | 24351.22  | 18986.8   | 18286.25  | 18428.2   | 14355.9   | 16487.76  | 20191.66  | 130268.4  | 370018.4  |
| 29523.53  | 28793.49  | 16453.96  | 19074.82  | 18034.61  | 16546.35  | 17438.13  | 20551.61  | 132663.2  | 372226.2  |
| 29015.96  | 27560.59  | 17196.21  | 18629.43  | 16456.18  | 14813.46  | 18180.39  | 14297.74  | 13697.18  | 354944.7  |
| 29955.76  | 27372.38  | 17560.7   | 17177.27  | 16658.56  | 15743.43  | 16554.21  | 31956.71  | 107193.9  | 361007.6  |

|           |           |           |           |           |           |           |           |           |           |
|-----------|-----------|-----------|-----------|-----------|-----------|-----------|-----------|-----------|-----------|
| LN242.943 |
| 481601    | 380847.7  | 509470.4  | 509267.6  | 267439.7  | 484429.5  | 309553.7  | 261600.5  | 267720.9  | 480771.6  |
| 455990.8  | 342526.5  | 602464.1  | 462436    | 260406.3  | 528830.5  | 307013.3  | 264331.1  | 249484.7  | 452317.1  |
| 602178.3  | 396437.1  | 470805.8  | 448845.3  | 294177.3  | 421919.3  | 545604.9  | 309642    | 256232.7  | 556012.1  |
| 432681.4  | 363263    | 408776.3  | 510232.8  | 234706    | 387849.2  | 420220.2  | 305097.1  | 272163.7  | 614852.9  |
| 502272.9  | 329942.4  | 543038.4  | 431767    | 240109    | 325572.6  | 320959    | 272147    | 266650    | 540491.6  |

|           |           |           |           |           |           |           |           |           |           |
|-----------|-----------|-----------|-----------|-----------|-----------|-----------|-----------|-----------|-----------|
| LN242.943 |
| 374207.7  | 371406.9  | 494922.3  | 374189.3  | 321687.4  | 371462.6  | 429114    | 516811.7  | 348626.2  | 361550.5  |
| 413749.3  | 422635.3  | 774448.2  | 212001    | 228607.6  | 382344.3  | 500402    | 576399.1  | 399800.6  | 386524.3  |
| 370935.2  | 408959.7  | 400568.5  | 217314.6  | 246369.6  | 470415.6  | 335826.4  | 322989.1  | 351050.6  | 550355.9  |
| 512291.3  | 524013.4  | 525281.7  | 290113.3  | 306747.8  | 380108.4  | 482952.2  | 622522.7  | 346516.3  | 326633.1  |
| 422777.2  | 432571.9  | 524925.1  | 226275.8  | 286652.7  | 554943.7  | 481180.1  | 566019.7  | 288648.3  | 447762.8  |

|           |           |           |           |           |           |           |           |           |           |
|-----------|-----------|-----------|-----------|-----------|-----------|-----------|-----------|-----------|-----------|
| LN242.943 |
| 221058.9  | 428418.3  | 365272.9  | 291356.8  | 462678.7  | 577404.7  | 414061.7  | 566075    | 294041.2  | 433557.1  |
| 377176.2  | 407145.4  | 337557.1  | 269305.5  | 412813.5  | 548263.5  | 288968.5  | 417386.1  | 481395.3  | 457454.3  |
| 274072.8  | 375924.6  | 360252.6  | 229638.8  | 475026.2  | 486737.3  | 326151.8  | 501476.3  | 395681.9  | 580369.2  |
| 177429.3  | 371473.5  | 406422.2  | 248664.8  | 507059    | 433927.4  | 470105    | 452633.5  | 460474.6  | 289813.6  |
| 202481.9  | 435254.5  | 379247.1  | 346138.2  | 342729.1  | 604995.7  | 457267.8  | 514144.2  | 429524.9  | 346673.6  |

|           |           |           |           |           |           |           |           |           |           |
|-----------|-----------|-----------|-----------|-----------|-----------|-----------|-----------|-----------|-----------|
| LN242.943 |
| 354598.6  | 365525.7  | 594579.5  | 70156.52  | 373333.8  | 387958.1  | 314544    | 510757.9  | 533716.8  | 449873.5  |
| 325949.5  | 340588.6  | 343111.8  | 94585.3   | 416651.8  | 499586.4  | 332104.8  | 361192.6  | 435814.1  | 456826    |
| 331353.3  | 372419.7  | 364096.5  | 99057.13  | 609407    | 662585.8  | 347730.4  | 462611.3  | 471279.4  | 341638.3  |
| 286068.5  | 363862.2  | 400496.2  | 93590.44  | 469237.6  | 452103.6  | 313056.4  | 425070.6  | 435832.3  | 505463.4  |
| 368785.7  | 355734.5  | 407819.9  | 108480.9  | 408221.8  | 423353.2  | 325973.8  | 399351.4  | 380622.6  | 445779.5  |

|           |           |           |           |           |           |           |           |           |           |
|-----------|-----------|-----------|-----------|-----------|-----------|-----------|-----------|-----------|-----------|
| LN242.943 |
| 336388.6  | 354925.7  | 590100.2  | 346176.5  | 311387.5  | 540553.2  | 280074.7  | 385637.2  | 349225.1  | 287400.3  |
| 419270.4  | 435375.6  | 423859.1  | 443277.8  | 352584    | 403932.6  | 474686.9  | 483208.7  | 382290.6  | 283892.6  |
| 172746.7  | 437057.9  | 646990.9  | 407912.2  | 328416.3  | 447651.5  | 247132.9  | 532454.4  | 422379.3  | 304373.7  |
| 213307.8  | 512219    | 460938.2  | 374707.6  | 303648.3  | 593842.4  | 256738    | 499138.2  | 427960.3  | 318425.9  |
| 249096.5  | 442521.8  | 392937.1  | 509368.1  | 299623.9  | 554587.8  | 293629.2  | 385311.3  | 342601.3  | 291786.5  |



|           |           |           |           |           |           |           |           |           |           |
|-----------|-----------|-----------|-----------|-----------|-----------|-----------|-----------|-----------|-----------|
| LN242.943 |
| 367498.6  | 428088    | 530601.3  | 112092.7  | 680052    | 469034.3  | 467208.6  | 401834.7  | 114200.3  | 356146.1  |
| 295380.7  | 476758.9  | 472574.3  | 157758.5  | 453415.9  | 392732.2  | 475143.5  | 377994.3  | 115142.5  | 318561.6  |
| 303588.9  | 311100.4  | 469536    | 108848.1  | 355117.2  | 479411.5  | 434358    | 396018.6  | 85960.74  | 273907.8  |
| 252237.1  | 321364.6  | 413117.5  | 146913.1  | 485396.9  | 535398.7  | 609324.9  | 467086.7  | 105843    | 245563.3  |
| 326346.6  | 323558.9  | 321524    | 93241.34  | 440652.5  | 316175.7  | 440245    | 587262.8  | 118704.2  | 317533.8  |

|           |           |           |           |           |           |           |           |           |           |
|-----------|-----------|-----------|-----------|-----------|-----------|-----------|-----------|-----------|-----------|
| LN242.943 |
| 469796.9  | 350478.1  | 365992.4  | 244728.9  | 234391.6  | 211338.9  | 136408.2  | 352035.8  | 142365.9  | 406849.1  |
| 442919.5  | 201267.9  | 369002.7  | 282787.6  | 402288.8  | 203466.8  | 65952.75  | 443729.8  | 101160.1  | 394848.6  |
| 393317.5  | 292957.7  | 438388.4  | 267435.3  | 343364    | 268035.2  | 70601.51  | 456724.4  | 110102.5  | 367402.8  |
| 612169    | 271352.1  | 497518.2  | 356838.8  | 234978.4  | 227615.7  | 124883.7  | 433780.5  | 121690.9  | 413892    |
| 459664.3  | 328018.2  | 334622.5  | 235512.3  | 264562.7  | 259289.1  | 80988.13  | 345926.9  | 93599.32  | 454390.4  |

|           |           |           |           |           |           |           |           |           |           |
|-----------|-----------|-----------|-----------|-----------|-----------|-----------|-----------|-----------|-----------|
| LN242.943 |
| 474685.7  | 306063.7  | 621750.7  | 410582.9  | 632186.2  | 450716.8  | 437624.6  | 402132.4  | 487828.1  | 414368.1  |
| 437475    | 324914.4  | 436866.1  | 419648.2  | 376833.1  | 360038    | 625118.4  | 532335.1  | 608897.9  | 349714.8  |
| 560491.3  | 461235.8  | 610685.8  | 331352.1  | 402053.4  | 494227    | 494553.2  | 472809.2  | 507755.7  | 449023.9  |
| 727808.8  | 306216.8  | 426820    | 416516.8  | 384573.1  | 585163.7  | 444988.5  | 466521.1  | 450523.7  | 470403.8  |
| 536801.5  | 294686.9  | 490266.8  | 389264.8  | 446269.1  | 397124.4  | 464951.6  | 367549.5  | 474044    | 480444.1  |

|           |           |           |           |           |           |           |           |           |           |
|-----------|-----------|-----------|-----------|-----------|-----------|-----------|-----------|-----------|-----------|
| LN242.943 | LN242.943 | LN242.943 | LN242.943 | LN242.985 | LN242.986 | LN242.986 | LN242.986 | LN242.985 | LN242.985 |
| 83277.61  | 327568.9  | 335885.7  | 495234.3  | 49479.2   | 25794.81  | 18168     | 19777.97  | 22399.69  | 25967.69  |
| 88533     | 292492.7  | 534904.3  | 613818.3  | 38414.6   | 26347.28  | 17817.9   | 19766.82  | 24639.82  | 25256.6   |
| 86490.53  | 304204.6  | 621600.9  | 488715.2  | 44522.36  | 24755.99  | 21145.91  | 18123.34  | 24192.01  | 28305.94  |
| 75145.75  | 327529.7  | 442674.3  | 445533.9  | 43752.34  | 26177.82  | 19262.57  | 19510.56  | 18807.72  | 27905.07  |
| 72322.27  | 356686.8  | 509835.7  | 688797.6  | 46383.63  | 22964.17  | 18273.45  | 18773.08  | 21660.01  | 26778.04  |

|           |           |           |           |           |           |           |           |           |           |
|-----------|-----------|-----------|-----------|-----------|-----------|-----------|-----------|-----------|-----------|
| LN242.985 | LN242.985 | LN242.985 | LN242.985 | LN242.986 | LN242.985 | LN244.984 | LN244.984 | LN244.984 | LN244.985 |
| 37161.29  | 28324.4   | 27558.53  | 37771.01  | 13079.41  | 73002.65  | 12338.59  | 33819.29  | 59617.28  | 42939.51  |
| 38740.98  | 27147.93  | 30211.77  | 39227.53  | 12768.92  | 73665.33  | 14527.12  | 55346.68  | 71538.13  | 53178.42  |
| 38859.05  | 25465.38  | 31987.15  | 35615.95  | 12540.69  | 72754.44  | 11875.83  | 33769.28  | 68619.22  | 44797.6   |
| 39374.65  | 28103.13  | 27709.93  | 37750.86  | 12374.4   | 71834.27  | 10339.62  | 35397.52  | 65674.04  | 36702.92  |
| 38567.47  | 23911.6   | 33339.92  | 33709.92  | 12599.3   | 75333.97  | 16239.54  | 48266.89  | 63602.65  | 55923.96  |

|           |           |           |           |           |           |           |           |           |           |
|-----------|-----------|-----------|-----------|-----------|-----------|-----------|-----------|-----------|-----------|
| LN244.984 | LN244.984 | LN244.985 | LN244.984 | LN244.985 | LN244.984 | LN244.985 | LN244.985 | LN244.985 | LN244.984 |
| 47817.04  | 54943.08  | 46134.55  | 51245.14  | 48582.06  | 86516.23  | 55973.81  | 15241.54  | 55547.56  | 98783.62  |
| 72067.2   | 42178.4   | 39697.45  | 63740.04  | 33243.23  | 65583.11  | 54466.35  | 19096.48  | 36541.91  | 70936.26  |
| 62545.64  | 38866.4   | 47239.32  | 61588.32  | 41012.08  | 53334.74  | 50236.52  | 19866.9   | 39325.16  | 64629.53  |
| 60517.61  | 29494.03  | 37906.38  | 67417.66  | 24629.1   | 44558.85  | 67396.38  | 16610.91  | 64428.11  | 68851.26  |
| 61573.72  | 45995.12  | 46874.14  | 68181.87  | 33010.27  | 66504.42  | 42311.44  | 22007.93  | 45676.88  | 64462.47  |

|           |           |           |           |           |           |           |           |           |           |
|-----------|-----------|-----------|-----------|-----------|-----------|-----------|-----------|-----------|-----------|
| LN244.985 | LN244.985 | LN244.985 | LN244.984 | LN244.984 | LN244.985 | LN244.984 | LN244.985 | LN244.984 | LN244.985 |
| 29076.98  | 47923.28  | 60710.7   | 86859.38  | 66308.26  | 23733.46  | 94210.06  | 70232.13  | 41959.61  | 39870.47  |
| 26837.2   | 50744.35  | 67582.87  | 71849.7   | 83006.11  | 24739.25  | 87024.79  | 71991.52  | 51023.3   | 47202.09  |
| 28360.36  | 43238.79  | 52812.22  | 67647.44  | 59323.21  | 26316.78  | 75567.75  | 60813.32  | 48948.66  | 63637.25  |
| 22365.16  | 35042.69  | 50114.65  | 104869.8  | 61268.04  | 20636.31  | 77718.84  | 51030.9   | 63144.82  | 45651.16  |
| 29714.01  | 39064.93  | 73549.21  | 66963.9   | 74183.85  | 24637.97  | 81322.36  | 69962.23  | 48978.39  | 42583.22  |

|           |           |           |           |           |           |           |           |           |           |
|-----------|-----------|-----------|-----------|-----------|-----------|-----------|-----------|-----------|-----------|
| LN244.985 | LN244.985 | LN244.984 | LN244.984 | LN244.984 | LN244.984 | LN244.984 | LN244.984 | LN244.985 | LN244.985 |
| 38495.08  | 17591.08  | 66812.61  | 77510.31  | 62682.37  | 39902.37  | 87097.61  | 50237.94  | 22662.86  | 44921.16  |
| 43201.01  | 25690.57  | 65634.08  | 119537.5  | 86434.23  | 48907.39  | 104695.6  | 51068.03  | 18526.75  | 55773.97  |
| 40934.76  | 20094.66  | 68071.81  | 64448.4   | 81327.98  | 36123.23  | 84869.11  | 58746.9   | 18959.09  | 45223.87  |
| 46071.55  | 31934.78  | 64844.37  | 79827.41  | 104620.9  | 40256.03  | 99574.11  | 53889.03  | 18222.34  | 51906.41  |
| 47154.75  | 18461.54  | 60237.38  | 84997.97  | 73940.07  | 39257.44  | 89191.21  | 43333.29  | 23585.45  | 46357.6   |



|           |           |           |           |           |           |           |           |           |           |
|-----------|-----------|-----------|-----------|-----------|-----------|-----------|-----------|-----------|-----------|
| LN244.984 | LN244.985 | LN244.984 | LN244.984 | LN244.985 | LN244.985 | LN244.985 | LN244.984 | LN244.985 | LN244.984 |
| 81472.69  | 82559.88  | 49314.71  | 70117.15  | 35072.38  | 37223.79  | 25346.27  | 50177.77  | 20971.5   | 97473.03  |
| 68689.56  | 56637.87  | 69326.69  | 71653.43  | 35661.17  | 43593.87  | 31390.05  | 70431.14  | 27117.29  | 110434.4  |
| 64604.01  | 60081.07  | 56761.05  | 75595.97  | 37117.81  | 39083.04  | 30881.67  | 56047.35  | 20440.09  | 97731.99  |
| 63364.29  | 65802.65  | 73299.13  | 105924.2  | 35309.71  | 47455.45  | 46351.21  | 82236.97  | 23346.23  | 96316.87  |
| 49304.67  | 46171.82  | 57745.82  | 58441.91  | 39208.67  | 33965.12  | 37863.88  | 53723.99  | 28303.94  | 84078.34  |

|           |           |           |           |           |           |           |           |           |           |
|-----------|-----------|-----------|-----------|-----------|-----------|-----------|-----------|-----------|-----------|
| LN244.985 | LN244.985 | LN244.984 | LN244.985 | LN244.985 | LN244.985 | LN244.985 | LN244.984 | LN244.984 | LN244.984 |
| 55545.41  | 41422.08  | 80363.93  | 48358.98  | 35341.77  | 22629.79  | 42985.54  | 61483.87  | 51122.71  | 49444.85  |
| 40302.74  | 42486.54  | 74448.66  | 47484.19  | 33531.98  | 25308.38  | 37183.82  | 37413.91  | 73036.1   | 48140.71  |
| 40763.14  | 49717.37  | 92039.21  | 47029.09  | 35574.01  | 21219.01  | 43365.72  | 38379.23  | 61368.99  | 52902.78  |
| 38219.69  | 48374.77  | 79741.69  | 61779.5   | 31593.34  | 21729.4   | 50231.54  | 40893.88  | 64787.5   | 43350.26  |
| 41333.48  | 52020.35  | 94029.44  | 76210.34  | 41523.92  | 28325.93  | 36135.55  | 39600.98  | 51466.55  | 57688.26  |

|           |           |           |           |           |           |           |           |           |           |
|-----------|-----------|-----------|-----------|-----------|-----------|-----------|-----------|-----------|-----------|
| LN244.985 | LN244.985 | LN244.985 | LN244.985 | LN244.985 | LN244.984 | LN244.985 | LN244.985 | LN244.985 | LN244.984 |
| 33717.99  | 50692.53  | 54773.54  | 18630.28  | 28923.99  | 58158.29  | 56845.17  | 35953.71  | 50655.24  | 59998.89  |
| 55302.96  | 55273.39  | 57477.99  | 27430.54  | 19048.91  | 51237.87  | 70142.15  | 31141.54  | 44918.26  | 68766.67  |
| 35228.1   | 58654.14  | 48658.89  | 21338.33  | 21708.47  | 46119.98  | 52375.55  | 30061.26  | 34058.31  | 67752.11  |
| 36076.54  | 45741.17  | 64767.27  | 17552.17  | 18848.55  | 48745.87  | 54737.24  | 27785.79  | 28186.52  | 115276.3  |
| 37951.41  | 55127.8   | 58379.13  | 18810.09  | 21814.15  | 43156.37  | 50095.57  | 36954.9   | 31760.69  | 74888.26  |

|           |           |           |           |           |           |           |           |           |           |
|-----------|-----------|-----------|-----------|-----------|-----------|-----------|-----------|-----------|-----------|
| LN244.985 | LN244.985 | LN244.985 | LN244.985 | LN244.984 | LN244.984 | LN244.985 | LN244.984 | LN244.984 | LN244.985 |
| 25097.94  | 61765.87  | 43255.3   | 33338.83  | 43519.61  | 43187.47  | 28372.43  | 88614.04  | 52241.13  | 47441.12  |
| 24774.53  | 44081.7   | 55635.13  | 40438.27  | 67666.57  | 54323.11  | 42005.58  | 83384.97  | 37481.13  | 64154.45  |
| 23405.58  | 60825.31  | 41495.56  | 36901.58  | 42349.68  | 44566.09  | 40398.11  | 74664.04  | 43521.69  | 50916.37  |
| 22022.61  | 48349.77  | 47073.13  | 34512.46  | 42482.46  | 32024.71  | 41448.58  | 84674.66  | 44060.8   | 55524.19  |
| 25706.51  | 60758.45  | 47124.72  | 30576.84  | 48560.74  | 60836.17  | 36820.31  | 76085.15  | 41114.35  | 47251.41  |

|           |           |           |           |           |           |           |           |           |           |
|-----------|-----------|-----------|-----------|-----------|-----------|-----------|-----------|-----------|-----------|
| LN244.985 | LN244.984 | LN244.984 | LN244.984 | LN244.984 | LN244.985 | LN244.985 | LN244.984 | LN244.984 | LN244.985 |
| 45317.11  | 43257.99  | 76475.6   | 97097.94  | 63612.95  | 39349.78  | 67816.46  | 83695.47  | 124878.7  | 18008.33  |
| 34730.48  | 53990.11  | 56124.25  | 53438.62  | 77249.87  | 28046.09  | 76030.96  | 98163.47  | 69284.22  | 13102.6   |
| 39111.12  | 36741.87  | 64032.09  | 58118.05  | 71156.47  | 39419.49  | 67846.45  | 81865.38  | 84706.49  | 15040.41  |
| 32443.33  | 37750.2   | 70317     | 58326.72  | 62589.26  | 54496.49  | 58949     | 82301.67  | 98756.63  | 15064.84  |
| 29908.73  | 49671.77  | 62218.9   | 54971.42  | 65557.06  | 38914.59  | 60998.68  | 98024.83  | 86659.89  | 15603.9   |

|           |           |           |           |           |           |           |           |           |           |
|-----------|-----------|-----------|-----------|-----------|-----------|-----------|-----------|-----------|-----------|
| LN244.985 | LN244.984 | LN245.983 | LN246.886 | LN246.965 | LN246.965 | LN247.000 | LN247.000 | LN247.000 | LN247.000 |
| 42549.88  | 74184.11  | 42126.52  | 10197.77  | 11951.04  | 20376.48  | 41685.77  | 15463.75  | 27379.6   | 19575.58  |
| 42434.83  | 74921.29  | 38224.07  | 10123.14  | 12445.08  | 18466.15  | 46208.06  | 19968.42  | 24837.5   | 29510.54  |
| 46256.22  | 70321.28  | 42735.61  | 10042.21  | 11876.8   | 18613.28  | 37283.24  | 18602.92  | 29183.49  | 26600.74  |
| 48244.75  | 82289.41  | 42401.72  | 13385.99  | 11387.31  | 16326.75  | 53843.41  | 19584.83  | 23185.43  | 26320.6   |
| 57861.02  | 62371.7   | 44653.62  | 12285.37  | 11298.93  | 18936.76  | 34778.5   | 21485.11  | 22062.72  | 25447.47  |

|           |           |           |           |           |           |           |           |           |           |           |
|-----------|-----------|-----------|-----------|-----------|-----------|-----------|-----------|-----------|-----------|-----------|
| LN247.000 | LN247.000 | LN246.999 | LN247.000 | LN247.000 | LN247.000 | LN247.000 | LN247.000 | LN247.000 | LN247_12. | LN247_12. |
| 36308     | 13836.76  | 50703.38  | 46514.2   | 33779.47  | 50828.53  | 24151.65  | 40706.63  | 65632.99  | 58649.51  |           |
| 43202.55  | 11202.93  | 44901.48  | 44295.33  | 20621.26  | 40696.87  | 25517.28  | 45803.82  | 67373.28  | 96352.14  |           |
| 35000.06  | 12816.28  | 49352.01  | 41131.14  | 28633.5   | 61640.34  | 24139.86  | 40439.89  | 65505.82  | 45182.72  |           |
| 33980.95  | 14804.39  | 59228.12  | 29643.33  | 22495.17  | 60016.08  | 24887.3   | 41583.52  | 69365.5   | 47962.17  |           |
| 46514.62  | 13835.33  | 89030.82  | 50689.72  | 29692.95  | 48783.18  | 22357.79  | 63227.51  | 54516.49  | 43010.5   |           |

|           |           |           |           |           |           |           |           |           |           |
|-----------|-----------|-----------|-----------|-----------|-----------|-----------|-----------|-----------|-----------|
| LN247.000 | LN247.000 | LN247.000 | LN246.999 | LN247.000 | LN247.000 | LN247.000 | LN247.000 | LN247_12. | LN247.000 |
| 34067.29  | 19900.35  | 49177.6   | 52165.06  | 34043.09  | 33664.48  | 45417.2   | 44045.24  | 56009.37  | 60456.68  |
| 34648.79  | 23842.23  | 47681.77  | 60724.61  | 22095.43  | 62008     | 35017.38  | 39738.82  | 45548.14  | 58144.96  |
| 31286.01  | 17508.9   | 53847.46  | 54057.1   | 27331.77  | 39019.51  | 35262.73  | 37984.27  | 69212.39  | 46871.02  |
| 35304.02  | 12873.59  | 52723.23  | 81826.99  | 25878.5   | 38388.93  | 31852.87  | 38401.31  | 51385.53  | 40816.71  |
| 26186.17  | 17510.43  | 36439.78  | 58191.63  | 27889.27  | 40190.37  | 39122.92  | 31439.34  | 72940.96  | 41120.97  |



|           |           |           |           |           |           |           |           |           |           |
|-----------|-----------|-----------|-----------|-----------|-----------|-----------|-----------|-----------|-----------|
| LN247.000 |
| 41759.27  | 35768.32  | 52430.12  | 29939.89  | 33588.81  | 22148.63  | 43867.37  | 43240.57  | 41330.47  | 16876.17  |
| 54374.46  | 26593.38  | 47213.1   | 16942.81  | 35182.57  | 30343.34  | 35766.47  | 44236.52  | 57602.37  | 21955.37  |
| 54225.11  | 30787.78  | 40562.84  | 18763.88  | 39728.7   | 24835.92  | 27204.11  | 43914.24  | 50251.29  | 18083.77  |
| 51116.14  | 29041.07  | 59122.69  | 17367.68  | 37428.89  | 26611.76  | 27244.64  | 40449.68  | 50577.29  | 16476.64  |
| 52408.78  | 26416     | 36927.75  | 17120.26  | 37188.87  | 28755.11  | 28179.26  | 38172.16  | 49454.89  | 14713.54  |

|           |           |           |           |           |           |           |           |           |           |
|-----------|-----------|-----------|-----------|-----------|-----------|-----------|-----------|-----------|-----------|
| LN247.000 | LN246.999 | LN247.000 |
| 38116.72  | 52960.29  | 38190.12  | 35898.13  | 38374.62  | 31632.54  | 52675.38  | 16167.24  | 67069.53  | 26685.34  |
| 53212.56  | 38893.21  | 33154.26  | 27478.17  | 34135.56  | 45383.31  | 74382     | 18626.93  | 43880.19  | 42597.21  |
| 48591.64  | 48532.34  | 39646.13  | 23716.62  | 45062.44  | 44051.36  | 67668.21  | 18162     | 36440.82  | 29362.26  |
| 39152.41  | 41854.77  | 51037.75  | 35393.05  | 47973.37  | 54672.84  | 46932.89  | 14537.09  | 43492.12  | 33828.34  |
| 55178.66  | 63492.98  | 31809.87  | 26351.43  | 54516.05  | 47485.06  | 45428.52  | 18607.72  | 52866.62  | 29275.92  |

|           |           |           |           |           |           |           |           |           |           |
|-----------|-----------|-----------|-----------|-----------|-----------|-----------|-----------|-----------|-----------|
| LN246.999 | LN247.000 |
| 143825.2  | 44225.61  | 32348.38  | 36967.7   | 17876.31  | 52185.15  | 30828.25  | 64615.94  | 30053.64  | 28098.17  |
| 59806.06  | 51230.19  | 31654.48  | 30066.93  | 25182.61  | 36245.8   | 23220.14  | 55506.05  | 38095.17  | 29653.45  |
| 53177.68  | 47780.19  | 25706.68  | 34996.57  | 23492.53  | 46699.64  | 29015.31  | 67510.38  | 44347.17  | 28611.42  |
| 76212.13  | 46391.22  | 27362.78  | 32975.61  | 21169.74  | 53139.01  | 31064.12  | 46475.88  | 33137.24  | 31368.39  |
| 57655.68  | 47937.98  | 24137.09  | 29252.96  | 24796.87  | 54406.72  | 30353.69  | 53352.08  | 36320.29  | 37964.95  |

|           |           |           |           |           |           |           |           |           |           |
|-----------|-----------|-----------|-----------|-----------|-----------|-----------|-----------|-----------|-----------|
| LN247.000 | LN247.000 | LN247.000 | LN247_12. | LN247.000 | LN247.000 | LN247.000 | LN247.000 | LN247.000 | LN247.000 |
| 16624.52  | 34371.74  | 37340.84  | 45289.35  | 51399.01  | 28292.79  | 26863.75  | 25222.12  | 42663.61  | 30814.62  |
| 22123.62  | 36327.83  | 39144.77  | 58860.42  | 53413.56  | 25446.55  | 23672.2   | 41577.81  | 41765.2   | 23169.26  |
| 18253.21  | 31130.49  | 44888.09  | 60432.04  | 51112.57  | 25958.19  | 23606.99  | 28644.28  | 44651.15  | 32798.41  |
| 14805.63  | 25553.71  | 31191.42  | 55238.1   | 59131.63  | 24423.29  | 27330.68  | 23720.64  | 55794.99  | 24998.16  |
| 15345.03  | 36035.99  | 40728.68  | 76588.92  | 44019.02  | 34605.18  | 31943.27  | 28425.57  | 38954.55  | 33449.29  |

|           |           |           |           |           |           |           |           |           |          |           |
|-----------|-----------|-----------|-----------|-----------|-----------|-----------|-----------|-----------|----------|-----------|
| LN247.000 | LN247_12 | LN247.000 |
| 16808.8   | 19217.08  | 37576.82  | 30914.75  | 51817.76  | 30589.02  | 23416.88  | 20537.47  | 55511.31  | 25996.3  |           |
| 16795.01  | 24315.76  | 51826.52  | 26694.51  | 47931.98  | 28866.82  | 19272.32  | 25014.06  | 81361.26  | 24199.77 |           |
| 19882.08  | 16843.27  | 44018.57  | 33615.4   | 44645.35  | 33635.04  | 30518.92  | 21263.44  | 53611.86  | 31311.31 |           |
| 20170.02  | 19989.05  | 32412.49  | 32086.19  | 55590.57  | 27477.63  | 27222.77  | 23314.83  | 59679.39  | 24598.4  |           |
| 13865.4   | 19465.02  | 43857.17  | 31053.66  | 46838.34  | 29754.01  | 22230.49  | 21745     | 51183.13  | 34493.67 |           |

|           |           |           |           |           |           |           |           |           |           |
|-----------|-----------|-----------|-----------|-----------|-----------|-----------|-----------|-----------|-----------|
| LN247.000 | LN248.886 | LN248.960 |
| 30055.55  | 31336.5   | 26329.09  | 40134.82  | 36535.94  | 36050.07  | 36047.51  | 57720.61  | 44526.53  | 725114.8  |
| 42303.61  | 29707.67  | 48322.99  | 38288.22  | 37757.67  | 24688.21  | 40233.36  | 50968.17  | 55872.99  | 1120123   |
| 34463.99  | 32589.07  | 30056.2   | 38727.45  | 37440.19  | 26310.4   | 38990.59  | 40297.37  | 58344.77  | 796463.6  |
| 33851.63  | 52096.35  | 47451.87  | 35780.55  | 22077.92  | 31758.48  | 25646.09  | 35219.65  | 68819.25  | 823114.7  |
| 31041.54  | 37642.85  | 30591.28  | 40200.55  | 42867.93  | 27756.49  | 33638.54  | 40668.25  | 61774.95  | 968793.4  |

|           |           |           |           |           |           |           |           |           |           |
|-----------|-----------|-----------|-----------|-----------|-----------|-----------|-----------|-----------|-----------|
| LN248.960 |
| 1073746   | 768045.7  | 1065655   | 369310.2  | 1110881   | 890549.7  | 570041.4  | 462561.8  | 1235020   | 1013215   |
| 650958.5  | 892132.9  | 936020.1  | 509873.8  | 898267.7  | 781112.4  | 565841.8  | 429508.8  | 1587222   | 1328751   |
| 817897.9  | 891590.8  | 910418.3  | 505987.1  | 951063.2  | 683321    | 639365.5  | 405135.8  | 1430627   | 1095627   |
| 753374.1  | 725903.3  | 1730491   | 563497.1  | 1184905   | 498710.2  | 569005.5  | 332715.9  | 1301986   | 921377.7  |
| 1058804   | 676137.1  | 1272617   | 578744.1  | 1290305   | 603523.9  | 561566.1  | 273505.3  | 1395350   | 806431.6  |

|           |           |           |           |           |           |           |           |           |           |
|-----------|-----------|-----------|-----------|-----------|-----------|-----------|-----------|-----------|-----------|
| LN248.960 |
| 421841.8  | 529524.1  | 844377.3  | 1460494   | 872558.6  | 1151757   | 1182656   | 1591796   | 1419921   | 276635    |
| 408839.8  | 606892.7  | 1025894   | 1002829   | 1189936   | 883390.2  | 1815165   | 1195811   | 1162467   | 300198.2  |
| 410365.6  | 579180.6  | 742207.1  | 1168371   | 1127333   | 748249.5  | 1159467   | 1292594   | 1268569   | 254641.1  |
| 340851.7  | 546770.1  | 575536.4  | 1181948   | 1211592   | 913789    | 1235767   | 1489456   | 1184946   | 248811    |
| 473179    | 658605.2  | 1252039   | 1411004   | 1062570   | 938777.9  | 761226    | 1430553   | 1439745   | 350286.2  |



|           |           |           |           |           |           |           |           |           |           |
|-----------|-----------|-----------|-----------|-----------|-----------|-----------|-----------|-----------|-----------|
| LN248.960 |
| 401477.2  | 1080724   | 716530.8  | 444755.5  | 1278559   | 255343.9  | 248995.1  | 1308401   | 1248385   | 1616305   |
| 411626.6  | 1446671   | 725061.4  | 598153.5  | 997357.1  | 208095.8  | 311869.5  | 1635707   | 964058.7  | 784654.6  |
| 494156.2  | 1195794   | 622099.7  | 446223.6  | 822366.1  | 156676.5  | 359791.4  | 1223254   | 1066641   | 900779.7  |
| 616620.4  | 814985    | 765138.1  | 462983.3  | 904896.6  | 167016.7  | 252509    | 1066301   | 1667331   | 979910.7  |
| 548889.4  | 1303256   | 590390.7  | 372318.6  | 1023701   | 163568.1  | 254472.5  | 1074559   | 1874636   | 754241.6  |

|           |           |           |           |           |           |           |           |           |           |
|-----------|-----------|-----------|-----------|-----------|-----------|-----------|-----------|-----------|-----------|
| LN248.960 |
| 894577.4  | 214318.2  | 961065.2  | 1338627   | 588329.3  | 1081499   | 644127.5  | 1318190   | 247727.1  | 569413.8  |
| 642366.2  | 208702.2  | 839401.4  | 1084543   | 751118.9  | 984796.2  | 873697.9  | 760898.2  | 272458.9  | 607311    |
| 573389.5  | 192197.9  | 841606.8  | 1223717   | 723933.6  | 1026653   | 790546.7  | 740278.5  | 237508.7  | 860842.3  |
| 540006.4  | 213790.3  | 638694.9  | 881392.9  | 836575.6  | 923110    | 677473    | 723451.6  | 242672.4  | 863863.7  |
| 841140.5  | 173210.2  | 656813.2  | 1255389   | 558554.6  | 913509.5  | 1035798   | 789165.7  | 441557.3  | 668551.4  |

|           |           |           |           |           |           |           |           |           |           |
|-----------|-----------|-----------|-----------|-----------|-----------|-----------|-----------|-----------|-----------|
| LN248.960 | LN248.96_ | LN248.960 |
| 884965.2  | 1506201   | 605959.6  | 1102250   | 331875.8  | 861156    | 1380304   | 804395.2  | 919112.4  | 694852.2  |
| 1507261   | 1079434   | 434958.6  | 1104454   | 332054    | 1010324   | 985923.8  | 732751.4  | 1375522   | 908187.7  |
| 1420830   | 1403716   | 629478.1  | 1463169   | 381453.5  | 650017.2  | 1181544   | 1316066   | 1409180   | 775278.3  |
| 1070780   | 1139855   | 772917.4  | 1339114   | 261864.9  | 766568.8  | 1005449   | 815083.3  | 1318049   | 1163737   |
| 1017378   | 1180810   | 655010.9  | 949224.1  | 310442    | 883392.1  | 980081    | 588862.3  | 867687.1  | 937721.2  |

|           |           |           |           |           |           |           |           |           |                     |
|-----------|-----------|-----------|-----------|-----------|-----------|-----------|-----------|-----------|---------------------|
| LN248.960 | LN248.96_ LN248.960 |
| 919355.3  | 1302812   | 961974.8  | 654973    | 1160325   | 1474332   | 1259470   | 971443.8  | 997636.6  | 718593.4            |
| 1374248   | 1372521   | 1101709   | 767879.3  | 1274465   | 1396469   | 827549.8  | 981421.8  | 1704651   | 656760.2            |
| 1289117   | 752902    | 831322.7  | 582075.7  | 1147932   | 1011370   | 1006462   | 907583.2  | 1320852   | 557564              |
| 907446.5  | 967524.4  | 906016.9  | 523404.1  | 1029729   | 1024526   | 1409975   | 1199226   | 1815677   | 786194.5            |
| 1103043   | 1216959   | 927980.1  | 997180    | 1083580   | 1157190   | 1370633   | 797065.2  | 1532228   | 503435.4            |

|           |           |           |           |           |           |           |           |           |           |
|-----------|-----------|-----------|-----------|-----------|-----------|-----------|-----------|-----------|-----------|
| LN248.960 |
| 552458.4  | 863516.4  | 526646.2  | 665358.8  | 763696.9  | 527053.7  | 945262    | 1004582   | 1103620   | 1327457   |
| 488170.1  | 1052773   | 615035.4  | 756925.9  | 629107.4  | 487049.4  | 868399.4  | 1152970   | 1327951   | 1109703   |
| 595696.9  | 714653.9  | 439148.4  | 766087.1  | 705163    | 955413    | 1484572   | 976668.4  | 1777667   | 1092761   |
| 679505.8  | 1164027   | 736301    | 634612.7  | 833146.9  | 744820.1  | 1017252   | 1006311   | 1238242   | 1416347   |
| 556689.9  | 894042.1  | 786162.4  | 686288.4  | 731975.9  | 827330.5  | 1129850   | 1111784   | 1668156   | 973294    |

|           |           |           |           |           |           |           |           |           |           |
|-----------|-----------|-----------|-----------|-----------|-----------|-----------|-----------|-----------|-----------|
| LN248.960 | LN248.959 |
| 644321.5  | 702554.2  | 884035.3  | 839978.4  | 708194.4  | 701901.3  | 638325    | 203351.7  | 768784.5  | 1002031   |
| 961539.9  | 956286.3  | 639088    | 657596.3  | 1011758   | 866725.5  | 595115.3  | 253639.7  | 818545.1  | 1256669   |
| 893122.2  | 741104.6  | 601635.3  | 591606.1  | 540157.3  | 687183.3  | 554591.7  | 131759.5  | 933454.1  | 1092508   |
| 1060035   | 558665.7  | 803782.1  | 629014.9  | 709488.1  | 733687.1  | 588866.8  | 160565    | 1059030   | 1329386   |
| 890508    | 721745.5  | 740869.2  | 710759.1  | 745284.9  | 683427.9  | 611485.9  | 141630    | 1782608   | 1065012   |

|           |           |           |           |           |           |           |           |           |           |
|-----------|-----------|-----------|-----------|-----------|-----------|-----------|-----------|-----------|-----------|
| LN248.960 | LN248.960 | LN248.960 | LN249.149 |
| 1117845   | 840482.4  | 1024795   | 73716.03  | 51683.02  | 30022.55  | 55535.53  | 41467.07  | 34217.33  | 31621.73  |
| 934973.8  | 830747.5  | 914351.6  | 38527.47  | 67125.36  | 26179.65  | 54243.81  | 44553.64  | 59499.74  | 39335.81  |
| 1148256   | 836948.8  | 1057359   | 44138.86  | 60234.28  | 24575.44  | 62393.07  | 41109.3   | 53886.18  | 41420.16  |
| 972275.2  | 876609.2  | 1119762   | 41018.17  | 50544.61  | 30722.13  | 54989.52  | 46805.33  | 44801.34  | 45969.01  |
| 994279.1  | 1033404   | 832758.1  | 42704.98  | 58786.66  | 27746.85  | 60272.1   | 43908.29  | 51821.06  | 49816.91  |

|           |           |           |           |           |           |           |           |           |           |
|-----------|-----------|-----------|-----------|-----------|-----------|-----------|-----------|-----------|-----------|
| LN249.149 |
| 50200.72  | 33000.1   | 48180.56  | 51417.08  | 66271.46  | 41213.38  | 44540.44  | 33140.54  | 34397.81  | 52384.2   |
| 49581.81  | 26458.96  | 48771.98  | 40212.51  | 47518.05  | 45087.47  | 46793.14  | 37306.98  | 26266.64  | 32617.4   |
| 40136.97  | 39039.69  | 44210.78  | 46889.7   | 47433.29  | 59073.04  | 56178.64  | 41413.9   | 27108.28  | 40303.94  |
| 32819.75  | 31419.2   | 84168.7   | 45733.39  | 58317.04  | 49206.85  | 44370.24  | 33890.28  | 26856.22  | 46186.47  |
| 41181.18  | 34274.38  | 75601.59  | 60425.94  | 78638.5   | 48512.6   | 54210.78  | 58759.15  | 36757.82  | 39632.62  |



|           |           |           |           |           |           |           |           |           |           |
|-----------|-----------|-----------|-----------|-----------|-----------|-----------|-----------|-----------|-----------|
| LN249.149 |
| 44823.81  | 50723.18  | 38235.79  | 52400.43  | 27103.67  | 47361.8   | 40555.88  | 38328.27  | 60195.93  | 30150.07  |
| 50705.76  | 43994.26  | 35357.12  | 43550.84  | 28680.8   | 38759     | 25683.33  | 55179.62  | 45617.87  | 38118.33  |
| 37091.16  | 46902.47  | 43227.51  | 38298.22  | 32244.92  | 52305.59  | 33773.61  | 57657.07  | 44118.68  | 44079.06  |
| 50161.62  | 46043.9   | 39288.94  | 58766.48  | 31810.18  | 49048.66  | 32307.13  | 64782.91  | 49630.53  | 29505.49  |
| 74310.81  | 54575.59  | 49328.71  | 52492.28  | 30295.07  | 53737.76  | 52410.43  | 61615.69  | 83334.82  | 45619.94  |

|           |           |           |           |           |           |           |           |           |           |
|-----------|-----------|-----------|-----------|-----------|-----------|-----------|-----------|-----------|-----------|
| LN249.149 |
| 39624.13  | 57683.55  | 34136.53  | 48932.88  | 37183.32  | 35726.06  | 43968.85  | 58265.8   | 50757.71  | 34571.21  |
| 40596.44  | 58166.79  | 44786.31  | 31519.2   | 45022.81  | 45012.26  | 40837.99  | 55403.23  | 40886.54  | 29263.15  |
| 42093.43  | 64226.1   | 45440.57  | 39565.33  | 55328.7   | 33975.18  | 48320.96  | 45501.59  | 33801.62  | 34148.09  |
| 38337.65  | 57007.56  | 35582.33  | 49621.06  | 51482.25  | 37998.5   | 54386.7   | 47751.46  | 41404.28  | 32668.71  |
| 75138.03  | 72329.52  | 57910.91  | 42485.52  | 51963.94  | 47230.4   | 51095.54  | 48450.97  | 56336.55  | 35971.36  |

|           |           |           |           |           |           |           |           |           |           |
|-----------|-----------|-----------|-----------|-----------|-----------|-----------|-----------|-----------|-----------|
| LN249.149 |
| 65938.83  | 51751.23  | 63747.29  | 79802.12  | 43940.59  | 48561.09  | 35489.12  | 40842.51  | 45843.81  | 40938.93  |
| 62002.23  | 47080.37  | 44067.22  | 51469.5   | 46686.14  | 48383.46  | 46793.13  | 32428.43  | 45019.71  | 40669.13  |
| 60044.8   | 50431.48  | 44873.71  | 50330.4   | 50242.31  | 43174.55  | 45600.51  | 37856.55  | 43610.19  | 53940.4   |
| 53835.85  | 56796.97  | 58176.05  | 65624.22  | 33186.65  | 40969.03  | 48689.99  | 52502.7   | 45001.78  | 55497.04  |
| 80297.3   | 57972.22  | 55257.76  | 67576.42  | 68453.6   | 60854.59  | 48834.45  | 59929.92  | 61143.2   | 53580.05  |

|           |           |           |           |           |           |           |           |           |           |
|-----------|-----------|-----------|-----------|-----------|-----------|-----------|-----------|-----------|-----------|
| LN249.149 |
| 42507.41  | 55360.49  | 40348.68  | 42078.62  | 47250.59  | 44998.39  | 37631.66  | 54996.95  | 49215.68  | 46582.45  |
| 34296.57  | 70707.74  | 37770.98  | 27887.56  | 28754.5   | 31496.43  | 29292.14  | 42187.13  | 32274.26  | 39584.72  |
| 39756.67  | 52005.58  | 43207.94  | 34081.54  | 41539.11  | 32610.58  | 28884.19  | 51158.13  | 35614.62  | 38762.23  |
| 35648.42  | 51033.52  | 44585.8   | 30112.14  | 39199.81  | 45508.1   | 36074.92  | 54684.35  | 34259.04  | 50220.02  |
| 46113.55  | 52426.96  | 63300.4   | 41996.59  | 48184.32  | 47421.02  | 41882.47  | 61934.37  | 46487     | 49685.22  |

|           |           |           |           |           |           |           |           |           |           |
|-----------|-----------|-----------|-----------|-----------|-----------|-----------|-----------|-----------|-----------|
| LN249.149 |
| 43950.78  | 43695.57  | 36256.92  | 41792.73  | 34915.11  | 48015.94  | 45222.33  | 61193.92  | 39877.88  | 34316.72  |
| 34153.92  | 47218.36  | 47634.43  | 40047.67  | 31605.68  | 53163.15  | 41260.4   | 51162.65  | 35517.37  | 25919.63  |
| 30286.54  | 30970.68  | 29207.74  | 49849.87  | 52265.65  | 40080.75  | 48365.96  | 50210.45  | 36568.49  | 33763.34  |
| 33826.89  | 30259.92  | 34853.12  | 47982.72  | 39658.65  | 43117.89  | 36084.24  | 51199.6   | 34444.62  | 27875.7   |
| 40998.85  | 42353.11  | 43284.98  | 62308.61  | 54060.43  | 49942.34  | 45371.18  | 66843.44  | 39045.37  | 40484.81  |

|           |           |           |           |           |           |           |           |           |           |
|-----------|-----------|-----------|-----------|-----------|-----------|-----------|-----------|-----------|-----------|
| LN249.149 |
| 49438.3   | 46068.86  | 47354.21  | 25687.84  | 59385.64  | 39287.24  | 33665.64  | 36402.94  | 46482.24  | 40188.26  |
| 46589.4   | 64776.91  | 49959.29  | 35532.49  | 48973.22  | 42465.94  | 32042.97  | 38267.44  | 41658.81  | 47698.59  |
| 51587.18  | 44956.6   | 44791.05  | 36806.16  | 44589.52  | 34913.93  | 27688.7   | 38120.59  | 50276.05  | 52248.01  |
| 54542.57  | 47147.41  | 44607.54  | 38722.91  | 60172.22  | 39804     | 35476.5   | 47674.85  | 45567.41  | 36099.46  |
| 88548.42  | 66968.57  | 60235.14  | 34787.63  | 66848.51  | 50496.08  | 37358.78  | 52988.21  | 56701.56  | 41116.5   |

|           |           |           |           |           |           |           |           |           |           |
|-----------|-----------|-----------|-----------|-----------|-----------|-----------|-----------|-----------|-----------|
| LN249.149 | LN249.149 | LN249.149 | LN249.149 | LN249.977 | LN249.977 | LN249.977 | LN249.977 | LN249.977 | LN249.977 |
| 32353.71  | 31795.34  | 57101.04  | 64974.76  | 92205.56  | 116516.9  | 160334.4  | 125455.8  | 119059.4  | 150010.3  |
| 36755.42  | 31775.66  | 33458.54  | 54881.49  | 89377.68  | 157378.7  | 133774    | 124350.9  | 147157.2  | 126598.8  |
| 37349.13  | 23351.39  | 36004.31  | 46342.72  | 77379.78  | 103127.4  | 167408.2  | 123624.1  | 107241.8  | 121223.3  |
| 39026.01  | 41064.41  | 48661.19  | 53267.21  | 142517.1  | 95504.06  | 148107.6  | 115191.7  | 111591.5  | 139709.1  |
| 41341.83  | 45046.16  | 43997.3   | 76411.91  | 128533.5  | 118496.1  | 134814.2  | 102855.5  | 128414.1  | 123045.7  |

|           |           |           |           |           |           |           |           |           |           |
|-----------|-----------|-----------|-----------|-----------|-----------|-----------|-----------|-----------|-----------|
| LN249.977 | LN249.977 | LN249.977 | LN249.977 | LN249.977 | LN249.977 | LN249.978 | LN249.977 | LN249.977 | LN249.978 |
| 122494.6  | 121956.2  | 148658.7  | 127640.7  | 118730    | 64274.1   | 56875.68  | 148096.8  | 118405.7  | 76175.73  |
| 111588.1  | 102628.6  | 134525    | 123666.3  | 118847.1  | 119973.7  | 34328.02  | 134248    | 89278     | 110576.8  |
| 103709.7  | 105089.7  | 102481.9  | 121232.8  | 141430.2  | 71777.24  | 56984.56  | 108699.6  | 90084.21  | 93244.67  |
| 132344.2  | 122983.7  | 119062.5  | 135024.3  | 131471.7  | 84412.01  | 38965.65  | 129163.4  | 72294.36  | 98419.96  |
| 72591.09  | 135411.7  | 144555.9  | 94477.53  | 105413.2  | 81906.72  | 32605.41  | 87705.24  | 89558.59  | 68054.61  |



|           |           |           |           |           |           |           |           |           |           |
|-----------|-----------|-----------|-----------|-----------|-----------|-----------|-----------|-----------|-----------|
| LN249.978 | LN249.977 | LN249.977 | LN249.978 | LN249.978 | LN249.977 | LN249.978 | LN249.977 | LN249.977 | LN249.978 |
| 83946.75  | 125243.3  | 143129.4  | 46752     | 76849.11  | 115719.5  | 60736.72  | 132383.6  | 138046.3  | 94497.32  |
| 80187.02  | 150821    | 152512.1  | 70424.94  | 56078.56  | 118526.8  | 67865.09  | 129850.8  | 159507    | 79493.36  |
| 100651.6  | 104449.6  | 143065    | 54416.38  | 42636.55  | 171578.8  | 54139.37  | 135370.4  | 160735.9  | 92749.19  |
| 79186.17  | 117906.4  | 128830.1  | 55689.84  | 50830.66  | 124534.9  | 40000.91  | 120367.3  | 181779.5  | 94485.59  |
| 80634.16  | 110884.9  | 212157.9  | 64054.79  | 38419.09  | 111669.7  | 51773.67  | 141737    | 199262.7  | 103835.7  |

|           |           |           |           |           |           |           |           |           |           |
|-----------|-----------|-----------|-----------|-----------|-----------|-----------|-----------|-----------|-----------|
| LN249.977 | LN249.978 |
| 111006.2  | 126179.4  | 108623.4  | 139459.9  | 108422.2  | 180694.3  | 82246.9   | 179243.6  | 88318.82  | 43604.85  |
| 140501.8  | 145434.1  | 127947.6  | 149280.9  | 97346.89  | 155887.8  | 70792.32  | 118448.2  | 125885.4  | 42569.65  |
| 126669.8  | 123970.5  | 100794.6  | 118718.3  | 94192.72  | 130805.5  | 76124.11  | 127912.7  | 98072.18  | 59159.4   |
| 134681.9  | 155934.8  | 115212.5  | 130562.4  | 86952.71  | 176833    | 73193.93  | 122047.5  | 72439.15  | 53594.38  |
| 107233.4  | 118564.4  | 113092.4  | 146866.1  | 62056.32  | 177279.1  | 68985.6   | 131348    | 123157.1  | 52770.02  |

|           |           |           |           |           |           |           |           |           |           |
|-----------|-----------|-----------|-----------|-----------|-----------|-----------|-----------|-----------|-----------|
| LN249.977 | LN249.977 | LN249.977 | LN249.977 | LN249.977 | LN249.978 | LN249.977 | LN249.977 | LN249.978 | LN249.977 |
| 140021.6  | 118602.5  | 113622.6  | 83127.83  | 94868.58  | 106264.9  | 187443.6  | 94831.23  | 63983.46  | 121434.2  |
| 154647.9  | 161587.4  | 128063.6  | 83829.83  | 93358.11  | 89639.31  | 166360.4  | 71626.95  | 65125.42  | 152213.7  |
| 106079.3  | 148169.5  | 98941.52  | 64266.07  | 104007.4  | 102622.2  | 161686.8  | 95535.16  | 56333.88  | 111537.5  |
| 105578.4  | 135712    | 89839.97  | 76737.96  | 83956.42  | 108479.4  | 163633.7  | 84765.67  | 62565.58  | 115258.8  |
| 116629.1  | 117768.4  | 146278.7  | 146647.7  | 112511.7  | 109418.3  | 151580    | 78204.14  | 68218.7   | 116389.4  |

|           |           |           |           |           |           |           |           |           |           |
|-----------|-----------|-----------|-----------|-----------|-----------|-----------|-----------|-----------|-----------|
| LN249.977 | LN249.978 | LN249.978 | LN249.977 | LN249.977 | LN249.978 | LN249.977 | LN249.977 | LN249.977 | LN249.978 |
| 157707.8  | 120599.3  | 68257.39  | 122207.3  | 156208.5  | 95632.28  | 64450.35  | 127621.4  | 173541.8  | 43451.04  |
| 94019.55  | 150771.5  | 46634.21  | 108248.7  | 150375    | 75463.94  | 72342.11  | 79632.41  | 145797.1  | 40149.5   |
| 106509.8  | 102550.4  | 55553.55  | 144613.1  | 118668.3  | 91010.29  | 80610     | 127849    | 112222.8  | 49776.24  |
| 79554.19  | 131567.5  | 51918.61  | 119820.8  | 159398.1  | 89695.34  | 82140.09  | 92237.91  | 143564.2  | 34477.13  |
| 79653.26  | 136674.8  | 42990.8   | 115969.6  | 124023.8  | 93291.13  | 77505.8   | 89225.41  | 140257.2  | 41761.66  |

|           |           |           |           |           |           |           |           |           |           |
|-----------|-----------|-----------|-----------|-----------|-----------|-----------|-----------|-----------|-----------|
| LN249.978 | LN249.977 | LN249.978 |
| 134618.4  | 108328.6  | 148058.6  | 86887.34  | 154045.4  | 105334.8  | 222345.2  | 90469.74  | 122218.4  | 167599.8  |
| 99053.16  | 81876.56  | 133727.5  | 86226.06  | 200521.8  | 121739.8  | 178810.1  | 100503    | 107565.8  | 149603    |
| 105824.4  | 112644.2  | 152988.9  | 86601.4   | 142980.5  | 138137.3  | 135480.3  | 103349.6  | 214979.5  | 205391.7  |
| 136890.9  | 126891.6  | 148970.5  | 90140.96  | 171345.2  | 96964.27  | 137563.2  | 97905.3   | 111612.1  | 133916.9  |
| 147172.8  | 96070.62  | 130206.8  | 112827.9  | 142313.8  | 109296.8  | 126611.6  | 101193.2  | 102977.6  | 115305.7  |

|           |           |           |           |           |           |           |           |           |           |
|-----------|-----------|-----------|-----------|-----------|-----------|-----------|-----------|-----------|-----------|
| LN249.977 | LN249.978 | LN249.978 | LN249.978 | LN249.977 | LN249.978 | LN249.978 | LN249.978 | LN249.977 | LN249.977 |
| 121124.4  | 112124.9  | 53701.13  | 120809.3  | 98962.96  | 39138.58  | 54482.88  | 134701.3  | 130114    | 93383.36  |
| 73016.41  | 90954.14  | 56122.07  | 108366.4  | 136218.2  | 61366.28  | 42116.61  | 83631.41  | 128002.9  | 88205.84  |
| 85180.34  | 86969.15  | 64377.38  | 169046.7  | 108143.2  | 42941.23  | 54684.15  | 75326.06  | 120634.3  | 91805.2   |
| 107281.2  | 104286.8  | 39834.5   | 113948.3  | 73321.88  | 45926.64  | 42227.06  | 81887.61  | 131617.3  | 80849.66  |
| 105964.7  | 85275.06  | 60959.46  | 102416.8  | 123391.3  | 46970.5   | 35472.85  | 79134.83  | 127489.7  | 98290.59  |

|           |           |           |           |           |           |           |           |           |           |
|-----------|-----------|-----------|-----------|-----------|-----------|-----------|-----------|-----------|-----------|
| LN249.977 | LN249.977 | LN249.977 | LN249.977 | LN249.977 | LN250.144 | LN250.144 | LN250.144 | LN250.144 | LN250.144 |
| 173264.2  | 98874.24  | 119848.7  | 87715.9   | 133115    | 26568.9   | 40158.01  | 75748.85  | 41650.57  | 47295.23  |
| 116705.2  | 106733    | 117751.2  | 77724.38  | 131228.7  | 20693.9   | 54592.76  | 79031.05  | 42443.08  | 39755.4   |
| 135177.9  | 120837.7  | 127765.5  | 84857.33  | 123613.4  | 32018.82  | 57938.92  | 84185.52  | 50843.59  | 54928.56  |
| 173136.5  | 100120.7  | 122180.2  | 109186.4  | 127868.4  | 28922.22  | 53734.43  | 83078.97  | 50562     | 52097.76  |
| 179642.4  | 112913.9  | 113170.3  | 73881.47  | 128640.3  | 24415.82  | 52901.55  | 66807.2   | 47412.42  | 59644.24  |

|           |           |           |           |           |           |           |           |           |           |
|-----------|-----------|-----------|-----------|-----------|-----------|-----------|-----------|-----------|-----------|
| LN250.144 |
| 66639.85  | 163436    | 38307.74  | 51527.12  | 79876.64  | 54794.79  | 84819.92  | 54227.87  | 92506.43  | 61081.39  |
| 59249.26  | 91458.57  | 49346.64  | 52954.72  | 71332.54  | 66509.51  | 59612.5   | 41556.37  | 99599.48  | 80139.94  |
| 58102.67  | 106728.2  | 43129.91  | 47564.57  | 88359.08  | 52118.8   | 96187.64  | 66600.4   | 81012.26  | 75819.14  |
| 98554.39  | 99849.69  | 50418.33  | 50477.47  | 121912.6  | 55917.85  | 85354.5   | 42875.12  | 81054.52  | 76641.78  |
| 57886.25  | 124111.7  | 37940.25  | 54511.09  | 76034.38  | 75120.13  | 76120.28  | 54676.81  | 91053.17  | 55928.71  |



|           |           |           |           |           |           |           |           |           |           |
|-----------|-----------|-----------|-----------|-----------|-----------|-----------|-----------|-----------|-----------|
| LN250.144 |
| 69798.2   | 91910.17  | 94387.02  | 77651.58  | 82710.19  | 95284.36  | 64675     | 60012.58  | 70590.2   | 45490.11  |
| 94706.1   | 99086.61  | 119236.5  | 70870.05  | 62865.26  | 87319.03  | 131675.4  | 79528.79  | 62879.72  | 66683.83  |
| 56869.53  | 82051.44  | 163376.4  | 88257.75  | 88712.74  | 101567.6  | 81618.04  | 77996.37  | 59892.23  | 42272.12  |
| 61118.04  | 95421.01  | 99050.94  | 119959.8  | 78425.6   | 91462.16  | 61710.97  | 87847.15  | 67351.67  | 58267.35  |
| 87945.06  | 109195.9  | 94140.62  | 72516.2   | 88161.93  | 84218.8   | 77382.33  | 74551.74  | 55531.01  | 41051.38  |

|           |           |           |           |           |           |           |           |           |           |
|-----------|-----------|-----------|-----------|-----------|-----------|-----------|-----------|-----------|-----------|
| LN250.144 |
| 51526.76  | 40518.52  | 36034.45  | 65049.16  | 72628.74  | 70415.01  | 94840.41  | 74985.02  | 74851.88  | 44705.86  |
| 55670.69  | 54973.34  | 48832.54  | 63985.34  | 76443.2   | 65829.21  | 99981.65  | 105631.8  | 66565.1   | 46033.75  |
| 48437.94  | 50390.43  | 41040.42  | 58691.18  | 67924.02  | 65975.7   | 68365.82  | 79503.62  | 64082     | 51716.6   |
| 77179.69  | 41453.5   | 38941.4   | 73117.43  | 71444.87  | 81267.56  | 103617.9  | 113090.4  | 86461.91  | 46294.17  |
| 60338.86  | 56875.55  | 39133.53  | 76498.82  | 82770.11  | 60397.52  | 102540    | 79017.15  | 64511.32  | 57595.22  |

|           |           |           |           |           |           |           |           |           |           |
|-----------|-----------|-----------|-----------|-----------|-----------|-----------|-----------|-----------|-----------|
| LN250.144 |
| 91955.13  | 57749.99  | 71526.47  | 95883.11  | 39326.82  | 51044.61  | 65014.77  | 75965.59  | 40254.46  | 60005.1   |
| 81985.98  | 97427.08  | 43903.54  | 80196.58  | 43726.31  | 60054.47  | 64742.38  | 128986    | 32970.5   | 58178.79  |
| 66212.26  | 46779.82  | 57034.38  | 72533     | 35452.94  | 60528.02  | 55433.55  | 75550.9   | 54425.7   | 78392.12  |
| 69913.88  | 63326.48  | 54556.14  | 72919.15  | 39198.27  | 70993.84  | 72484.1   | 62478.91  | 51556.19  | 66332.23  |
| 86472.09  | 54642.44  | 70359.88  | 70861.56  | 39726.65  | 46798.02  | 71761.08  | 63468.05  | 36586.01  | 72193.03  |

|           |           |           |           |           |           |           |           |           |           |
|-----------|-----------|-----------|-----------|-----------|-----------|-----------|-----------|-----------|-----------|
| LN250.144 |
| 114877.6  | 44522.83  | 103187.7  | 58614.17  | 38578.07  | 70155.97  | 88746.59  | 50426.73  | 46073.22  | 84861.86  |
| 102192    | 61742.75  | 67495.87  | 48836.31  | 62418.62  | 55955.42  | 93630.36  | 47312.67  | 52018.52  | 144919.5  |
| 103933.8  | 51124.62  | 61331.63  | 52407.1   | 60094.4   | 90926.78  | 82671.39  | 50805.45  | 56961.05  | 119526.1  |
| 89095.69  | 53318.38  | 77862.52  | 61892.27  | 47427.9   | 67863.03  | 81269.73  | 37594.83  | 86314.05  | 133473    |
| 107673.2  | 64275.88  | 66639.46  | 61771.61  | 50852.69  | 77851.73  | 135194.5  | 52304.71  | 42474.32  | 62047.88  |

|           |           |           |           |           |           |           |           |           |           |
|-----------|-----------|-----------|-----------|-----------|-----------|-----------|-----------|-----------|-----------|
| LN250.144 |
| 129646.9  | 55101.76  | 57570.73  | 45126.12  | 48386.76  | 143141.6  | 27464.24  | 94847.27  | 66851.52  | 100584.8  |
| 100815.9  | 57825.88  | 46887.88  | 41529.51  | 57554.95  | 142718.3  | 45250.07  | 66020.57  | 45682.26  | 101306.2  |
| 123378.8  | 47315.41  | 76624.9   | 51776.75  | 45535.52  | 145803.9  | 32685.09  | 96291.97  | 52335.03  | 94558.44  |
| 119561.8  | 43378.06  | 47487.49  | 54276.01  | 47845.44  | 135859.2  | 40962.85  | 57859.99  | 64349.66  | 96648.57  |
| 125906.9  | 51072.04  | 64436.99  | 60557.03  | 40530.89  | 124630.4  | 38986.19  | 88400.61  | 54863.8   | 101640.8  |

|           |           |           |           |           |           |           |           |           |           |
|-----------|-----------|-----------|-----------|-----------|-----------|-----------|-----------|-----------|-----------|
| LN250.144 |
| 67081.48  | 48542.53  | 32205.36  | 62130.04  | 123535.7  | 96418.67  | 43489.75  | 55197.23  | 47353.6   | 68209.71  |
| 57892.9   | 39969.42  | 41608.55  | 68370.25  | 136633.2  | 116527.2  | 45377.76  | 61616.94  | 48829.07  | 47498.03  |
| 64352.83  | 47455.18  | 40090.15  | 70974.87  | 121657.2  | 94576.93  | 55157.34  | 82980.14  | 67726.98  | 49542.23  |
| 47491.64  | 40584.41  | 29499.34  | 73019.57  | 179722.2  | 89893.85  | 43419.43  | 49982.14  | 40892.59  | 49879.92  |
| 62481.24  | 66140.85  | 43450.54  | 64544.37  | 117330.9  | 61325.21  | 50972.43  | 53498.79  | 67073.7   | 46717.36  |

|           |           |           |           |           |           |           |           |           |           |
|-----------|-----------|-----------|-----------|-----------|-----------|-----------|-----------|-----------|-----------|
| LN250.144 |
| 65565.99  | 52867.25  | 85283.47  | 86601.48  | 38793.71  | 51285.09  | 81874.43  | 39907.81  | 38469.52  | 38635.78  |
| 58390.6   | 59512.51  | 64458.99  | 76105.14  | 37259.34  | 50747.3   | 108467.9  | 49850.02  | 42983.76  | 38022.33  |
| 63274.84  | 64056.44  | 105921.5  | 71469.71  | 38855.8   | 51640.04  | 74565.22  | 37139.41  | 42156.69  | 31596.96  |
| 66516.72  | 45867     | 61882.85  | 69702.89  | 43122.95  | 53556.32  | 115015.5  | 32366.49  | 46735.79  | 39373.74  |
| 67515.82  | 47552.53  | 71712.93  | 77184.01  | 40556.06  | 45404.13  | 109079.2  | 36685.1   | 63686.64  | 39854.99  |

|           |           |           |           |           |           |           |           |           |           |
|-----------|-----------|-----------|-----------|-----------|-----------|-----------|-----------|-----------|-----------|
| LN250.883 | LN250.994 |
| 11008.13  | 36120.59  | 57100.77  | 35860.4   | 91371.31  | 34489.45  | 25185.9   | 53808.75  | 36331.52  | 59343.6   |
| 9755.734  | 46333.66  | 45378.93  | 26432.74  | 44803.45  | 37604.4   | 30746.29  | 51480.57  | 52218.85  | 60965.96  |
| 10301.69  | 43590.06  | 49968.94  | 25319.55  | 50151.91  | 35997.84  | 24311.17  | 38668.62  | 42968.78  | 66205.06  |
| 19169.59  | 39396.98  | 53177.46  | 25709.57  | 52922.27  | 40472.48  | 24384.93  | 41361.27  | 43313.24  | 66410.93  |
| 11597.06  | 49389.63  | 47870.74  | 28447.19  | 51525.18  | 39416.88  | 25944.35  | 45340.96  | 43921.49  | 73243.42  |



|           |           |           |           |           |           |           |           |           |           |
|-----------|-----------|-----------|-----------|-----------|-----------|-----------|-----------|-----------|-----------|
| LN250.994 |
| 25029.73  | 80787.58  | 56650.13  | 23022.91  | 35845.68  | 59905.5   | 30440.8   | 25867.76  | 22904.15  | 31774.95  |
| 28187.48  | 57768.69  | 78750.59  | 19304.74  | 34521.12  | 40219.69  | 31739.97  | 31150.47  | 29742.31  | 23537.37  |
| 26288.55  | 59795.54  | 59506.03  | 25077.48  | 34577.79  | 34393.52  | 25664.27  | 21872.67  | 26034.62  | 22224.51  |
| 25794.03  | 62292.46  | 66125.66  | 27212.21  | 32277.41  | 34533.25  | 20389.14  | 27379.53  | 23462.87  | 23826.44  |
| 23791.98  | 56564.72  | 64120.41  | 24001.33  | 31641.3   | 38259.05  | 24272.23  | 24030.44  | 26817.8   | 22282.81  |

|           |           |           |           |           |           |           |           |           |           |
|-----------|-----------|-----------|-----------|-----------|-----------|-----------|-----------|-----------|-----------|
| LN250.994 |
| 39488.97  | 49533.05  | 25075.82  | 25046.53  | 59010.88  | 18738.49  | 27909.92  | 34647.09  | 33389.07  | 40794.25  |
| 30471.79  | 57032.77  | 48679.38  | 23684.83  | 61104.49  | 11546.87  | 31223.37  | 22875.75  | 29605.75  | 23446.92  |
| 28306.94  | 50344.67  | 29331.8   | 25844.81  | 62547.23  | 11292.45  | 28015.82  | 24793.01  | 35236.37  | 33673.96  |
| 31503.78  | 46772.81  | 29134.37  | 23310.72  | 68804.3   | 10399.31  | 24413.92  | 26080.43  | 36292.54  | 32565.89  |
| 29821.06  | 45794.63  | 34184.12  | 26145.48  | 62422.55  | 13208.21  | 27515.75  | 28718.09  | 36742.22  | 30071.03  |

|           |           |           |           |           |           |           |           |           |           |
|-----------|-----------|-----------|-----------|-----------|-----------|-----------|-----------|-----------|-----------|
| LN250.994 |
| 29758.45  | 60926.62  | 43668.71  | 21993.5   | 23518.77  | 29327.9   | 65010.81  | 39015.53  | 53171.6   | 18230.57  |
| 41632.22  | 72888.71  | 42990.44  | 15692.22  | 42884.63  | 44886.55  | 53275.59  | 34950.49  | 31389.94  | 13147.13  |
| 40427.93  | 53285.04  | 26278.37  | 16735.54  | 33085.73  | 40877.19  | 60848.34  | 37523.9   | 50664.49  | 15266.98  |
| 35211.88  | 62343.79  | 27598.97  | 19194.39  | 30471.75  | 39442.74  | 54496.06  | 41879.75  | 46987.81  | 14645.67  |
| 36512.82  | 54853.42  | 29315.17  | 17985.88  | 33360.72  | 40928     | 56664.68  | 38264.86  | 46446.56  | 13449.06  |

|           |           |           |           |           |           |           |           |           |           |
|-----------|-----------|-----------|-----------|-----------|-----------|-----------|-----------|-----------|-----------|
| LN250.994 |
| 43517.65  | 60037.33  | 22773.68  | 16177.94  | 42883.68  | 15469.09  | 76454.3   | 34689.49  | 17700.3   | 35680.24  |
| 34563.59  | 63425.03  | 24030.67  | 18110.33  | 34822.4   | 16632.76  | 51075.88  | 35863.29  | 15540.21  | 25894.78  |
| 42416.62  | 45692.81  | 29718.36  | 19128.7   | 36064.63  | 16796.76  | 54938.99  | 29709.05  | 17411.38  | 29381.98  |
| 41511.37  | 51059.04  | 25946.14  | 15927.34  | 40344.3   | 19243.75  | 56820.13  | 29355.21  | 18383.56  | 34299.56  |
| 43397.9   | 53089.29  | 28719.36  | 14642     | 39683.84  | 19408.24  | 59572.32  | 29849.22  | 19118.4   | 30535.31  |

|           |           |           |           |           |           |           |           |           |           |
|-----------|-----------|-----------|-----------|-----------|-----------|-----------|-----------|-----------|-----------|
| LN250.994 |
| 49274.58  | 40753.11  | 52672.77  | 37390.15  | 51169.67  | 52808.8   | 31095.5   | 17502.42  | 39799.19  | 17104.19  |
| 65011.51  | 56156.24  | 36513.74  | 43111.78  | 27858.92  | 36330.97  | 30301.11  | 15041.89  | 47567.65  | 14776.19  |
| 50584.33  | 45747.6   | 43370.21  | 38068.72  | 29718.18  | 29521.18  | 31477.57  | 13773.29  | 40090.17  | 18263.24  |
| 50670.07  | 40223.57  | 43389.51  | 39028.7   | 28543.17  | 29059.72  | 25385.76  | 13507.37  | 41223.58  | 18866.24  |
| 54279.39  | 44794.35  | 40635.17  | 38344.31  | 25933.72  | 32310.41  | 23460.92  | 13764.43  | 38437.33  | 15212.33  |

|           |           |           |           |           |           |           |           |           |           |
|-----------|-----------|-----------|-----------|-----------|-----------|-----------|-----------|-----------|-----------|
| LN250.994 |
| 16132.07  | 35725.88  | 15549.19  | 21466.62  | 51595.65  | 39176.27  | 37056.11  | 12991.5   | 49739.82  | 26345.19  |
| 20161.55  | 43095.01  | 20833.39  | 30565.03  | 56640.53  | 19178.76  | 42192.38  | 15061.22  | 49316.35  | 27047.34  |
| 15067.36  | 33710.6   | 17205     | 25099.69  | 53019.53  | 27682.73  | 45518.88  | 14216.2   | 43772.06  | 27071.23  |
| 14707.82  | 34688.66  | 14372.38  | 23005.79  | 50662.25  | 26430.12  | 42448.09  | 13787.09  | 37020.33  | 26612.08  |
| 14514.64  | 32732.43  | 15202.33  | 24468.15  | 51522.44  | 26463.52  | 41992.33  | 14594.92  | 39037.99  | 27425.08  |

|           |           |           |           |           |           |           |           |           |           |
|-----------|-----------|-----------|-----------|-----------|-----------|-----------|-----------|-----------|-----------|
| LN250.994 |
| 40161.93  | 25103.14  | 36623.45  | 66923.28  | 47185.34  | 22651.21  | 27165.21  | 42923.87  | 12639.14  | 43409.26  |
| 30130.82  | 34860.59  | 33190.07  | 49125.94  | 47935.24  | 21367.98  | 29120.52  | 30193.49  | 14153.83  | 60445.72  |
| 39094.59  | 29288.84  | 38348.17  | 52306     | 44648     | 21970.76  | 27819.84  | 28777.99  | 11972.02  | 48446.99  |
| 40344.79  | 30308.06  | 39045.62  | 45445.91  | 43252.58  | 23345.43  | 32044.39  | 31924.84  | 11445.68  | 50091.25  |
| 39561.24  | 30808.79  | 36589.02  | 49146.93  | 42263.82  | 23693.49  | 26375.82  | 29778.27  | 13189.84  | 52660.22  |

|           |           |           |           |           |           |           |           |           |           |
|-----------|-----------|-----------|-----------|-----------|-----------|-----------|-----------|-----------|-----------|
| LN250.994 | LN250.994 | LN250.994 | LN250.994 | LN250.994 | LN250.994 | LN251.147 | LN251.147 | LN252.916 | LN252.973 |
| 25494.97  | 64338.51  | 29087.32  | 48646.26  | 17828.87  | 32960.84  | 19926.11  | 16282.09  | 27121.05  | 22833.33  |
| 19037.86  | 47563.97  | 26413.53  | 51364.91  | 13022.09  | 36186.58  | 23540.33  | 15911.86  | 25555.79  | 13864.36  |
| 22724.54  | 55615.03  | 26047.74  | 46196.38  | 16024.78  | 33567.57  | 21346.84  | 16348.89  | 20169.03  | 25061.87  |
| 24427.32  | 57504.72  | 26618.87  | 47367.89  | 13889.49  | 30548.09  | 22004.65  | 18388.41  | 24582.85  | 26641.81  |
| 21352.61  | 55275.42  | 25344.59  | 47828.7   | 14744.36  | 29993.02  | 22339.42  | 16035.47  | 28835.76  | 18118.45  |



|           |           |           |           |           |           |           |           |           |           |
|-----------|-----------|-----------|-----------|-----------|-----------|-----------|-----------|-----------|-----------|
| LN252.973 | LN254.100 | LN254.100 | LN254.100 | LN254.100 | LN254.985 | LN254.985 | LN254.985 | LN254.985 | LN254.985 |
| 20082.39  | 15064.92  | 13039.03  | 15772.63  | 20311.07  | 42391.81  | 37588.9   | 48902.69  | 56591.54  | 52362.02  |
| 17155.59  | 15896.67  | 12116.03  | 19493.15  | 17309.02  | 41268.16  | 34213.75  | 45069.38  | 61584.84  | 49429.86  |
| 20956.62  | 14688.99  | 15081.71  | 18632.09  | 20303.04  | 44219.36  | 41308.88  | 42503.86  | 60506.34  | 53088.43  |
| 20614.55  | 16653.91  | 13750.7   | 16157.92  | 17568.73  | 51651.36  | 35818.73  | 50100.08  | 62960.12  | 50823.57  |
| 13341.58  | 15687.18  | 11120.34  | 15307.3   | 17929.04  | 44247.14  | 39936.82  | 53723.34  | 56808.33  | 50676.36  |

|           |           |           |           |           |           |           |           |           |           |
|-----------|-----------|-----------|-----------|-----------|-----------|-----------|-----------|-----------|-----------|
| LN254.985 |
| 50351.33  | 30429.03  | 46724.64  | 49252.09  | 47898.6   | 38696.32  | 64553.51  | 38530.17  | 38520.11  | 37708.31  |
| 48271.56  | 31144.76  | 50488.8   | 49481.21  | 45850.88  | 37153.23  | 72552.89  | 41779.43  | 35584.52  | 39587.77  |
| 46861.7   | 31446.8   | 48593.65  | 44165.56  | 47769.48  | 37225.84  | 65196.03  | 36041.58  | 32046.7   | 39486.01  |
| 52993.84  | 26972.98  | 48357.56  | 50436.57  | 44926.04  | 41998.52  | 67564.36  | 37852.61  | 35610.22  | 42179.4   |
| 49883.08  | 32549.34  | 58805.74  | 46828.78  | 45446.01  | 40624.71  | 69458.88  | 42146.09  | 34600.4   | 41573.58  |

|           |           |           |           |           |           |           |           |           |           |
|-----------|-----------|-----------|-----------|-----------|-----------|-----------|-----------|-----------|-----------|
| LN254.985 |
| 36455.75  | 41985.31  | 38900.79  | 27671.04  | 33954.99  | 41681.84  | 32666.04  | 35849.42  | 40753.6   | 26011.83  |
| 33786.8   | 40609.31  | 37383.22  | 30030.37  | 35853.17  | 46819.01  | 33154.26  | 35833.91  | 37142.41  | 34056.92  |
| 32761.13  | 36106.14  | 40537.24  | 31706.28  | 34410.72  | 42314.19  | 31122.66  | 37219.85  | 42751.86  | 30346.91  |
| 31814.85  | 38331.85  | 39540.54  | 30929.03  | 32522.96  | 41686.65  | 32986.14  | 39716.29  | 39157.78  | 27426.4   |
| 30194.09  | 37593.5   | 41880.04  | 29127.36  | 40364.14  | 42814.44  | 30006.06  | 35279.64  | 41951.32  | 27435.62  |

|           |           |           |           |           |           |           |           |           |           |
|-----------|-----------|-----------|-----------|-----------|-----------|-----------|-----------|-----------|-----------|
| LN254.985 | LN254.985 | LN254.985 | LN254.985 | LN255.232 | LN255.232 | LN255.232 | LN255.232 | LN255.232 | LN255.232 |
| 36350.66  | 33709.43  | 24312.7   | 26172.97  | 58461.93  | 155961.6  | 416977.9  | 108029.1  | 96754.33  | 151079.6  |
| 40379.13  | 35477.65  | 22962.38  | 24580.25  | 80590.1   | 132784.6  | 437259.1  | 102380.8  | 137756.2  | 86741.19  |
| 36159.65  | 33746.74  | 23009.36  | 25566.2   | 82957.21  | 151980.7  | 454013.3  | 117958.8  | 112105.1  | 105122    |
| 36757.63  | 32080.41  | 21625.13  | 24878.97  | 80196.86  | 181691.1  | 409613.8  | 145118.9  | 144100.1  | 131502.6  |
| 36288.97  | 33846.84  | 25753.89  | 23249.69  | 94702.93  | 186296.7  | 417953.5  | 166696.5  | 143226.8  | 121854.7  |

|           |           |           |           |           |           |           |           |           |           |
|-----------|-----------|-----------|-----------|-----------|-----------|-----------|-----------|-----------|-----------|
| LN255.232 |
| 161146.9  | 95513.09  | 106533.6  | 101522    | 142863.7  | 121236.2  | 80246.64  | 120092.9  | 125958.5  | 91753.87  |
| 114267.3  | 99800.31  | 127716.9  | 97618.75  | 110101.2  | 106680.1  | 94092.9   | 106623    | 109386.5  | 91947.34  |
| 130846.8  | 112781    | 143317    | 118958.4  | 119565.2  | 130192.3  | 101626.4  | 117825.4  | 152708.1  | 132585.3  |
| 178518.8  | 125190.5  | 149125.8  | 112251.7  | 138561.1  | 155932.9  | 130699    | 135607.6  | 186769.1  | 107229.2  |
| 146863    | 123508.3  | 163723.6  | 121505.6  | 135382.8  | 153667.3  | 122240.7  | 128204    | 201383.4  | 134957.7  |

|           |           |           |           |           |           |           |           |           |           |
|-----------|-----------|-----------|-----------|-----------|-----------|-----------|-----------|-----------|-----------|
| LN255.232 |
| 124201.6  | 151970.6  | 126596.6  | 78756.75  | 70453.82  | 125755.6  | 127259.4  | 72748.64  | 93718.44  | 166196.1  |
| 113318.2  | 121156.1  | 89802.88  | 78487.07  | 72282.41  | 122903.9  | 127382.8  | 80455.23  | 111814.8  | 157070.3  |
| 133038.8  | 141669.1  | 134274.3  | 98818.76  | 79191.4   | 132983.3  | 135461.4  | 101080.9  | 106572.2  | 152897.8  |
| 178313.7  | 154635.2  | 138801.1  | 90577.22  | 93984.65  | 171868.3  | 146413.9  | 99243.06  | 121133.1  | 182033.2  |
| 151409.6  | 149152.4  | 139456.2  | 103361.1  | 103059.4  | 177940.4  | 164348    | 104998.3  | 127177.9  | 227608.2  |

|           |           |           |           |           |           |           |           |           |           |
|-----------|-----------|-----------|-----------|-----------|-----------|-----------|-----------|-----------|-----------|
| LN255.232 | LN255.233 |
| 89942.13  | 104462.9  | 129917.7  | 109743    | 139663.2  | 88647.66  | 78631.92  | 66522.91  | 165376.3  | 79223.91  |
| 91677.9   | 110436.7  | 127280.8  | 130556.1  | 148244.4  | 82641.92  | 96298.28  | 56840.08  | 131314.9  | 71925.09  |
| 94188.12  | 116720.7  | 130613.5  | 158412.1  | 157677.5  | 129289.9  | 121403.1  | 71346.9   | 181276.1  | 78138.54  |
| 135958.7  | 162108.4  | 137915.7  | 155723.3  | 178206.4  | 105944.8  | 123389.8  | 91047.67  | 194166.5  | 89230.08  |
| 128411.1  | 158253.2  | 150209.7  | 176662.9  | 195995.8  | 119454.3  | 139738.7  | 99942.08  | 190895.8  | 96737.34  |

|           |           |           |           |           |           |           |           |           |           |
|-----------|-----------|-----------|-----------|-----------|-----------|-----------|-----------|-----------|-----------|
| LN255.232 |
| 112588.1  | 93143.41  | 159586.6  | 119219    | 130130.3  | 120655.8  | 119474.6  | 118393    | 128782.9  | 79825.83  |
| 121284.3  | 120748.8  | 164592.9  | 101050.2  | 133057.7  | 121216    | 127181.9  | 123742.6  | 93148.55  | 112201.6  |
| 123846.5  | 158758.6  | 130873.2  | 123796.5  | 162409.5  | 148701.6  | 145065.9  | 140223.7  | 114956.3  | 104001.4  |
| 132906.9  | 134868.5  | 147885.9  | 139430.2  | 175102.3  | 177777.2  | 141285.5  | 138180.5  | 113216.3  | 115699.4  |
| 167494.2  | 149204.4  | 154890.6  | 164294.6  | 180071.2  | 173694    | 167938.9  | 146467.6  | 167838.7  | 114915.3  |



|           |           |           |           |           |           |           |           |           |           |
|-----------|-----------|-----------|-----------|-----------|-----------|-----------|-----------|-----------|-----------|
| LN255.232 |
| 93102.85  | 96330.74  | 106086    | 112159.4  | 100313.7  | 135928.2  | 87114.86  | 118197.9  | 88385.08  | 126945.6  |
| 98321.17  | 100614.6  | 99250.65  | 155671.4  | 112011.8  | 141394.6  | 100350.9  | 95391.89  | 91104.27  | 106513.9  |
| 125554.2  | 100280.6  | 103001.5  | 134693.7  | 118574.7  | 134510.2  | 109292.5  | 108955.3  | 104285.9  | 127364.7  |
| 143736.3  | 120616.2  | 126643.5  | 152463.7  | 142793.8  | 155905.1  | 133651.8  | 118624.9  | 111802.5  | 146849.4  |
| 141093.2  | 126301.7  | 117879.9  | 164092.6  | 124127.4  | 171645.5  | 144268.7  | 127770.5  | 114558.4  | 159521.8  |

|           |           |           |           |           |           |           |           |           |           |
|-----------|-----------|-----------|-----------|-----------|-----------|-----------|-----------|-----------|-----------|
| LN255.232 |
| 136576.2  | 177497.3  | 133785.7  | 97482.35  | 102480.8  | 140525.2  | 67749.28  | 136777    | 142632.8  | 101138.3  |
| 105649.3  | 158603.6  | 112174.7  | 102683.8  | 123036.5  | 122047.1  | 83325.26  | 153456.6  | 132640.6  | 132422.5  |
| 117622.1  | 134662    | 134553    | 117152.7  | 150024.6  | 129334.5  | 88843.81  | 197647.8  | 162291.6  | 108942.2  |
| 142446.3  | 193191.3  | 146377    | 125023.6  | 158194.5  | 166791.6  | 101025.2  | 149621.7  | 160987.3  | 122188.5  |
| 144192.3  | 166653.1  | 155198.4  | 134775.1  | 146364.8  | 155751.5  | 105198.2  | 166247    | 168157    | 124597.2  |

|           |           |           |           |           |           |           |           |           |           |
|-----------|-----------|-----------|-----------|-----------|-----------|-----------|-----------|-----------|-----------|
| LN255.232 | LN255.233 | LN255.232 |
| 197055.5  | 125541.7  | 100232.5  | 129279.1  | 106233.9  | 128962.4  | 152487.5  | 65792.28  | 71405.14  | 116006.9  |
| 131348.9  | 90030.96  | 124687.1  | 132877.2  | 120737.2  | 103881.4  | 149134.5  | 53356.41  | 75390.53  | 115554.1  |
| 163994.7  | 123406.5  | 114287.1  | 150135.9  | 110544.9  | 117294.9  | 155075.6  | 71330.03  | 88426.6   | 140830.6  |
| 177698.4  | 116793.4  | 146242    | 182352.3  | 131001.3  | 130362.8  | 182558.5  | 78610.32  | 98863.82  | 145032.1  |
| 185603.3  | 163651.9  | 127084.5  | 210053.2  | 142620    | 163248.7  | 199224.3  | 88836.68  | 100506.5  | 146074.5  |

|           |           |           |           |           |           |           |           |           |           |
|-----------|-----------|-----------|-----------|-----------|-----------|-----------|-----------|-----------|-----------|
| LN255.232 | LN255.232 | LN255.232 | LN255.822 | LN256.236 | LN256.236 | LN256.236 | LN256.236 | LN256.236 | LN256.236 |
| 128487.5  | 97244.85  | 126882.5  | 26843.11  | 71920.74  | 18439.54  | 16802.19  | 14967.83  | 17197.28  | 14567.76  |
| 112509.8  | 71021.92  | 111778.1  | 20803.94  | 75145.68  | 16224.7   | 17231.73  | 15937.9   | 16026.13  | 15362.99  |
| 148419    | 80761.92  | 146443.1  | 23759.42  | 64414.64  | 18626.5   | 19478.83  | 17018.94  | 16995.12  | 16182.17  |
| 172654.2  | 93533.59  | 143048.3  | 24407.09  | 65313.92  | 21045.72  | 20079.28  | 19707.44  | 18603.43  | 18153.54  |
| 187674    | 126406.1  | 142874.5  | 26750.09  | 67493.27  | 23119.06  | 20908.23  | 18599.52  | 21939.5   | 19255.59  |

|           |           |           |           |           |           |           |           |           |           |
|-----------|-----------|-----------|-----------|-----------|-----------|-----------|-----------|-----------|-----------|
| LN256.236 |
| 13192.32  | 16483.36  | 22111.93  | 14257.36  | 13545.51  | 23821.13  | 15693.43  | 25213.79  | 16844.95  | 17798.52  |
| 12241.62  | 13363.79  | 23434.92  | 11624.49  | 15026.79  | 23490.2   | 16914.73  | 24909.83  | 14934.77  | 19273.51  |
| 15203.44  | 15223.68  | 26262.92  | 15983.98  | 17658.3   | 24238.07  | 19832.27  | 27870.43  | 18490.3   | 20890.48  |
| 19063.92  | 19350.02  | 27246.37  | 14352.69  | 19284.74  | 29485.74  | 18836.47  | 31228.32  | 21766.22  | 27691.63  |
| 18377.02  | 21675.01  | 29332.09  | 16269.8   | 18000.11  | 27584.21  | 23536.16  | 30370.47  | 23167.97  | 26610.91  |

|           |           |           |           |           |           |           |           |           |           |
|-----------|-----------|-----------|-----------|-----------|-----------|-----------|-----------|-----------|-----------|
| LN256.236 | LN256.235 | LN256.236 | LN256.236 | LN256.236 | LN256.236 | LN256.236 | LN256.920 | LN256.954 | LN256.985 |
| 16516.14  | 24575.52  | 16284.63  | 19787.06  | 16728.69  | 15452.03  | 14905.16  | 59428.43  | 69065.28  | 52066.89  |
| 15974.15  | 24639.87  | 19200.3   | 18377.35  | 16881.01  | 15634.59  | 16243.91  | 56892.53  | 64905.25  | 52626.16  |
| 17504.12  | 25522.36  | 19996.18  | 25089.4   | 17595.37  | 17690.95  | 17120     | 61618.82  | 78644.31  | 51526.45  |
| 20160.4   | 28399.46  | 25086.51  | 23886.39  | 20894.82  | 20537.56  | 17645.23  | 55484.28  | 77856.76  | 53101.28  |
| 23000.27  | 29742.18  | 26205.44  | 24511.39  | 23071.91  | 22011.41  | 20797     | 70072.51  | 75306.81  | 55665.16  |

|           |           |           |           |           |           |           |           |           |           |
|-----------|-----------|-----------|-----------|-----------|-----------|-----------|-----------|-----------|-----------|
| LN256.985 |
| 51874.05  | 44422.1   | 44250.92  | 44787.22  | 41887.83  | 44024.18  | 50289.18  | 43291.08  | 42294.55  | 35260.99  |
| 54379.94  | 44500.12  | 45211.18  | 53593.48  | 40769.95  | 45238.36  | 51824.24  | 40060.71  | 43659.96  | 31777.23  |
| 50744.6   | 45835.43  | 50572.56  | 46978.35  | 42848.12  | 38771.77  | 46936.39  | 43927.71  | 41105.37  | 31556.14  |
| 54076.46  | 43476.32  | 46721.96  | 46767.38  | 45450.68  | 46907.84  | 49195.59  | 39006.18  | 42085.07  | 35079.54  |
| 54815.53  | 50309.72  | 49686.3   | 47209.56  | 36549.6   | 43872.99  | 51766.23  | 41556.57  | 39888.34  | 31259.58  |

|           |           |           |           |           |           |           |           |           |           |
|-----------|-----------|-----------|-----------|-----------|-----------|-----------|-----------|-----------|-----------|
| LN256.985 | LN256.985 | LN256.985 | LN256.985 | LN256.984 | LN256.985 | LN256.985 | LN256.985 | LN256.985 | LN256.985 |
| 36708.52  | 27671.65  | 39065.8   | 29317.13  | 28686.76  | 35190.63  | 36838.94  | 40545.28  | 29853.98  | 42459.06  |
| 29586.58  | 25490.44  | 45933.78  | 28827.19  | 30356.53  | 37373.87  | 35738.39  | 39282.56  | 30340.02  | 42767.21  |
| 30065.49  | 25086.97  | 38889.55  | 30260.06  | 29092.88  | 36703.8   | 33811.22  | 42107.25  | 28783.19  | 37219.61  |
| 33632.61  | 30400.6   | 39861.13  | 29045.93  | 28008.39  | 35698.54  | 34716.79  | 39704.97  | 28261.35  | 44839.76  |
| 34005.38  | 30729.45  | 40319.25  | 28265.34  | 31951.44  | 38036.86  | 35132.33  | 44018.76  | 31402.65  | 44704.21  |



|           |           |           |           |           |           |           |           |           |           |
|-----------|-----------|-----------|-----------|-----------|-----------|-----------|-----------|-----------|-----------|
| LN256.985 |
| 30633.18  | 46707.01  | 26038.74  | 34537.38  | 20996.37  | 29040.95  | 21855.95  | 23233.84  | 24869.77  | 35222.46  |
| 30273.42  | 51038.5   | 24179.7   | 32130.39  | 22531.88  | 27251.35  | 22085.08  | 23480.74  | 26484.45  | 35951.94  |
| 29257.28  | 46118.37  | 27433.15  | 32229.67  | 20852.94  | 30192.82  | 21164.85  | 24354.7   | 27508.23  | 35497.52  |
| 30808.01  | 48113.73  | 26820.55  | 31000.54  | 21892.61  | 24751.37  | 20569.58  | 20998.82  | 27883.33  | 32025.93  |
| 30019.56  | 45645.87  | 25276.99  | 31031.69  | 22649.34  | 29635.07  | 19130.3   | 22723.36  | 28612.67  | 34780.22  |

|           |           |           |           |           |           |           |           |           |           |
|-----------|-----------|-----------|-----------|-----------|-----------|-----------|-----------|-----------|-----------|
| LN256.985 |
| 39111.64  | 27149.08  | 24190.19  | 22127.46  | 26364.02  | 25627.9   | 26526.69  | 22839.56  | 46338.25  | 40647.09  |
| 37183.88  | 27538.97  | 28613.52  | 27171.25  | 25022.34  | 24808.19  | 29424.75  | 24268.27  | 47777.3   | 44808.93  |
| 34505.43  | 31575.3   | 24723.82  | 26846.18  | 26041.18  | 26285.79  | 25296.2   | 24962.17  | 41596.84  | 37463.51  |
| 35458.68  | 29273.88  | 22961.05  | 23305.52  | 22142.23  | 24479.5   | 25175.13  | 24020.09  | 39122.86  | 38819.29  |
| 36187.78  | 31000.1   | 23506.78  | 25453.94  | 22783.53  | 25217.76  | 27900.37  | 21822.32  | 42858.62  | 40524.54  |

|           |           |           |           |           |           |           |           |           |           |
|-----------|-----------|-----------|-----------|-----------|-----------|-----------|-----------|-----------|-----------|
| LN256.985 |
| 25240.19  | 37214.33  | 31959.71  | 32581.72  | 54205.34  | 24561.92  | 34953.08  | 33394.7   | 30789.63  | 42435.12  |
| 25327.39  | 34026.93  | 35154.19  | 36725.91  | 56580.3   | 27767.67  | 35161.16  | 29329.09  | 31520.54  | 45026.97  |
| 24085.58  | 36759.67  | 33073.2   | 32340.24  | 56889.36  | 26512.78  | 35010.16  | 30774     | 29752.39  | 43557.92  |
| 27741.19  | 36153.02  | 35565.71  | 33809.74  | 47602.91  | 26609.3   | 34886.19  | 33103.52  | 32367.98  | 42563.5   |
| 24405.5   | 31957.28  | 33037.61  | 36198.22  | 48161.16  | 25183.68  | 34892.58  | 30210.11  | 31656.82  | 40448.14  |

|           |           |           |           |           |           |           |           |           |           |
|-----------|-----------|-----------|-----------|-----------|-----------|-----------|-----------|-----------|-----------|
| LN256.985 |
| 26416.04  | 31227.86  | 33336.2   | 56623.7   | 43097.6   | 66598.18  | 24605.3   | 36042.37  | 24908.99  | 31460.61  |
| 28996.4   | 29165.72  | 39386.27  | 54550.76  | 40182.49  | 64995.32  | 26586.35  | 37642.31  | 25818.82  | 33851.59  |
| 27925.3   | 29514.39  | 37070.92  | 52729.9   | 40944.66  | 65464.34  | 28013.09  | 37291.41  | 25369.8   | 31255.43  |
| 27291.64  | 31017.26  | 34696.82  | 49733.82  | 41699.1   | 59459.49  | 28739.88  | 41343.98  | 25507.38  | 30688.58  |
| 25061.95  | 30293.81  | 31415.93  | 51339.18  | 41515.76  | 59453.02  | 24532.82  | 37172.12  | 24346.47  | 33991.07  |

|           |           |           |           |           |           |           |           |           |           |
|-----------|-----------|-----------|-----------|-----------|-----------|-----------|-----------|-----------|-----------|
| LN256.985 |
| 32345.4   | 35397.29  | 32891.03  | 23470.22  | 31945.82  | 25654.58  | 40219.27  | 20936.22  | 53258.8   | 30781.84  |
| 30331.19  | 32360.1   | 32484.37  | 25419.63  | 32998.31  | 26438.69  | 37615.81  | 21352.65  | 53893.52  | 28388.22  |
| 28135.02  | 33782.92  | 31879.56  | 26125     | 32100.27  | 29068.69  | 40031.48  | 18391.13  | 48083.99  | 31928.97  |
| 28879.18  | 34044.92  | 32156.04  | 28254.42  | 32680.7   | 29044.09  | 39930.68  | 20078.58  | 51712.71  | 29794.94  |
| 27824.48  | 32237.68  | 33767.62  | 23166.58  | 35974.28  | 23981.34  | 34309.2   | 19402.81  | 50871.75  | 30911.41  |

|           |           |           |           |           |           |           |           |           |           |
|-----------|-----------|-----------|-----------|-----------|-----------|-----------|-----------|-----------|-----------|
| LN256.985 | LN256.985 | LN256.985 | LN256.985 | LN256.985 | LN257.102 | LN257.102 | LN257.102 | LN257.102 | LN257.819 |
| 36635.05  | 33693.51  | 26612.74  | 65582.88  | 72107.3   | 15783.26  | 22327.07  | 15462.08  | 21601.9   | 27239.74  |
| 36380.2   | 34427.82  | 25444.01  | 60679.52  | 71935.73  | 14011.3   | 20562.12  | 14549.73  | 21097.9   | 21826.03  |
| 38964.58  | 35689.48  | 27192.95  | 59338.7   | 69354.36  | 16558.67  | 19819.84  | 15097.63  | 19397.78  | 21173.39  |
| 35969.37  | 33293.87  | 25059.75  | 58124.92  | 75147.73  | 16120.14  | 20644.18  | 13035.56  | 18262.9   | 25095.77  |
| 35662.66  | 31420.63  | 27997.43  | 60411.04  | 69128.67  | 15619.14  | 20241.8   | 16017.77  | 16912.43  | 23271.37  |

|           |           |           |           |           |           |           |           |           |           |
|-----------|-----------|-----------|-----------|-----------|-----------|-----------|-----------|-----------|-----------|
| LN257.856 | LN257.917 | LN258.915 | LN258.915 | LN258.916 | LN258.915 | LN258.915 | LN258.916 | LN258.915 | LN258.915 |
| 15651.23  | 42498.63  | 930422.3  | 228890.8  | 419712.4  | 228469.1  | 321580.3  | 414783.3  | 192075.8  | 241013.2  |
| 15605.74  | 32041.23  | 1349762   | 198106.5  | 329806.2  | 263450.1  | 315689.5  | 499350.1  | 213291.6  | 235325.2  |
| 12586.97  | 41607.85  | 1363880   | 237706.3  | 296015.6  | 217319.5  | 362493.4  | 495840.9  | 208645.2  | 327310.4  |
| 40516.7   | 38031.16  | 1171398   | 203638.1  | 292172.4  | 208721.3  | 305019.2  | 528429.9  | 228965.7  | 287891.8  |
| 36118.93  | 52431.16  | 1253491   | 189678.5  | 310342.1  | 195279.7  | 371949.6  | 576637.8  | 207420.1  | 215629.9  |

|           |           |           |           |           |           |           |           |           |           |
|-----------|-----------|-----------|-----------|-----------|-----------|-----------|-----------|-----------|-----------|
| LN258.916 | LN258.915 | LN258.915 | LN258.916 | LN258.915 | LN258.915 | LN258.915 | LN258.915 | LN258.915 | LN258.915 |
| 598852.6  | 133147.9  | 251665    | 438790.7  | 149962.4  | 335713.7  | 325832.6  | 242224.7  | 366805.3  | 213687.6  |
| 638593.2  | 129400.8  | 211889.4  | 409616    | 151371.4  | 307869.7  | 248173.5  | 249758.1  | 375281.6  | 232911.4  |
| 631039.6  | 146814    | 231401.9  | 371411.5  | 158571.2  | 328664.4  | 394269.9  | 246306.9  | 367241.4  | 248707.1  |
| 752733.1  | 138264.8  | 270416.7  | 321858.5  | 148636.6  | 310527.8  | 226527.8  | 256350.9  | 386830.8  | 258571.2  |
| 631523.2  | 113424.3  | 253021.8  | 449692.6  | 148135.7  | 282777.5  | 252791.3  | 271362.7  | 374658.7  | 240709.9  |



|           |           |           |           |           |           |           |           |           |           |
|-----------|-----------|-----------|-----------|-----------|-----------|-----------|-----------|-----------|-----------|
| LN258.915 | LN258.915 | LN258.915 | LN258.915 | LN258.915 | LN258.915 | LN258.916 | LN258.915 | LN258.915 | LN258.916 |
| 251648.2  | 390738    | 279443.7  | 282661    | 211025.5  | 165523    | 142981.4  | 239668    | 210874.4  | 146667.1  |
| 178365.6  | 383053.1  | 260285.6  | 269968.4  | 224618.9  | 164435.7  | 124599.1  | 232212.5  | 207438.9  | 156401.4  |
| 173398.9  | 280704.3  | 262494.3  | 289253.8  | 263555    | 181325.8  | 140451.5  | 235045.9  | 179088.2  | 187443.2  |
| 253874.7  | 400375.9  | 291644.2  | 298915.2  | 224322.5  | 160352.8  | 138425.4  | 289080.5  | 217388.5  | 159448.9  |
| 140448.2  | 410681.8  | 260779    | 285035.7  | 222144.5  | 165328.3  | 111779    | 216819    | 205058.2  | 151026.4  |

|           |           |           |           |           |           |           |           |           |           |
|-----------|-----------|-----------|-----------|-----------|-----------|-----------|-----------|-----------|-----------|
| LN258.915 | LN258.915 | LN258.916 | LN258.916 | LN258.980 | LN259.000 | LN259.000 | LN259.001 | LN259.000 | LN259.000 |
| 154871.4  | 125443.6  | 115072.7  | 233101.2  | 90262.73  | 67779.13  | 94480.18  | 109565.3  | 84506.4   | 99094.54  |
| 155875.9  | 129252    | 128185.7  | 236265.4  | 91119.04  | 184834.1  | 59361.83  | 73428.9   | 86471.32  | 76219.78  |
| 155908    | 134504.2  | 121617.1  | 239278.2  | 96687.58  | 141287    | 54113.03  | 80032.67  | 100777.3  | 103335.8  |
| 156171.4  | 136913.5  | 120780.3  | 231720.2  | 97535.51  | 110974.1  | 48048.46  | 58670.09  | 86571.62  | 81861.46  |
| 146509.3  | 119755.8  | 101608.2  | 211176.6  | 93127.97  | 134185.1  | 97788.22  | 65738.13  | 112703.5  | 74727.43  |

|           |           |           |           |           |           |           |           |           |           |
|-----------|-----------|-----------|-----------|-----------|-----------|-----------|-----------|-----------|-----------|
| LN259.000 | LN259.000 | LN259.000 | LN259.001 | LN259.000 | LN259.001 | LN259.000 | LN259.000 | LN259.000 | LN259.000 |
| 79952.99  | 64416.55  | 38481.44  | 49997.52  | 46429.71  | 71279.45  | 96729.7   | 96247.79  | 103975.1  | 114273    |
| 70910.51  | 59338.09  | 55248.67  | 52749.06  | 52109.31  | 46512.12  | 90015.37  | 91698.13  | 82988.75  | 112027.7  |
| 92346.5   | 69732.87  | 65803.27  | 82212.75  | 51668.44  | 53540.1   | 144114.7  | 69215.72  | 118427.3  | 148973.2  |
| 68758.6   | 56948.98  | 55431.4   | 48095.25  | 65567.88  | 58242.94  | 85352.25  | 80874.28  | 101113.5  | 102079.1  |
| 69709.78  | 90174.2   | 46494.06  | 50048.6   | 63202.75  | 66119.81  | 89211.63  | 64801.67  | 109943.2  | 85478     |

|           |           |           |           |           |           |           |           |           |           |
|-----------|-----------|-----------|-----------|-----------|-----------|-----------|-----------|-----------|-----------|
| LN259.000 | LN259.000 | LN259.000 | LN259.000 | LN259.000 | LN259.000 | LN259.001 | LN259.000 | LN259.000 | LN259.000 |
| 97026.53  | 64293.45  | 75083.01  | 91762.62  | 99640.36  | 103123.8  | 72022.12  | 78177.71  | 82368.76  | 114846.2  |
| 109227.9  | 54004.39  | 67530.28  | 87132.66  | 125880.3  | 112845.2  | 54933.06  | 71180.83  | 97483.33  | 147640.5  |
| 124020.6  | 66417.09  | 59081.9   | 75779.21  | 95937.93  | 202474.5  | 57578.41  | 67204.3   | 90399.45  | 81531.63  |
| 116294.8  | 65041.33  | 58430.59  | 67710.5   | 102174.6  | 117568.5  | 41805.39  | 78167.58  | 87473.18  | 114053.7  |
| 99309.98  | 64185.33  | 55831.76  | 98678.24  | 95580.16  | 121991    | 51307.91  | 65586.66  | 106722.9  | 138910.2  |

|           |           |           |           |           |           |           |           |           |           |
|-----------|-----------|-----------|-----------|-----------|-----------|-----------|-----------|-----------|-----------|
| LN259.001 | LN259.000 | LN259.001 | LN259.000 |
| 51902.16  | 18383.34  | 92140.81  | 40802.34  | 109827.5  | 77098.08  | 110017.1  | 111575.2  | 44478.66  | 46154.52  |
| 66851.32  | 26281.66  | 64693.45  | 26555.73  | 123573.8  | 60441.24  | 86675.45  | 117153.5  | 34628.72  | 46218.11  |
| 66464.6   | 25346.68  | 76995.09  | 31116.94  | 111517.9  | 51584.66  | 94944.67  | 191543.2  | 33282.03  | 60776.05  |
| 59231.83  | 17244.89  | 77334.77  | 31975.03  | 139136.1  | 61348.81  | 95512.62  | 133693.2  | 26559.66  | 54562.79  |
| 60550.88  | 15748.46  | 77629.02  | 39848.64  | 234875.7  | 59068.64  | 138176.7  | 124092.3  | 48055.54  | 58588.54  |

|           |           |           |           |           |           |           |           |           |           |
|-----------|-----------|-----------|-----------|-----------|-----------|-----------|-----------|-----------|-----------|
| LN259.000 | LN259.000 | LN259.001 | LN259.000 | LN259.000 | LN259.000 | LN259.000 | LN259.000 | LN259.000 | LN259.001 |
| 45363.99  | 93568.46  | 45342.49  | 93232.19  | 101824.9  | 115629.6  | 76483.64  | 46108.08  | 48243.82  | 20112.11  |
| 54450.83  | 95279.2   | 24189.26  | 126595.9  | 113432.4  | 114542.4  | 95002.05  | 34494.6   | 39779.67  | 30254.15  |
| 51746.11  | 67370.33  | 32733.78  | 91655.71  | 114911.3  | 101935.7  | 72552.2   | 38151.15  | 51554.9   | 24577.3   |
| 56088.16  | 75332.14  | 28550.11  | 80035.79  | 109323.8  | 89559.88  | 82226.27  | 38025.96  | 53965.75  | 26030.44  |
| 60049.05  | 74095.44  | 35612.26  | 110611.7  | 91013.36  | 75919.99  | 90284.24  | 64422.33  | 55675.01  | 39084.48  |

|           |           |           |           |           |           |           |           |           |           |
|-----------|-----------|-----------|-----------|-----------|-----------|-----------|-----------|-----------|-----------|
| LN259.000 | LN259.000 | LN259.000 | LN259.000 | LN259.000 | LN259.000 | LN259.001 | LN259.000 | LN259.000 | LN259.000 |
| 107702.4  | 67571.54  | 42736.69  | 152337.2  | 68080.24  | 131268.9  | 37100.42  | 70379.16  | 53823.4   | 63056.73  |
| 69724.93  | 61962.66  | 48165.02  | 115506.9  | 73359.18  | 126324.4  | 42734.29  | 65222.65  | 71877.45  | 49851.82  |
| 125588.4  | 75032.02  | 48575.62  | 94253.17  | 100694.9  | 120045.6  | 48038.61  | 91948.36  | 42679.58  | 86564.72  |
| 79082.8   | 86598.03  | 50605.72  | 134464.9  | 66266.67  | 114118.2  | 40918.96  | 64190.74  | 45280.9   | 62150.51  |
| 73685.66  | 80886.55  | 64684.3   | 86556.32  | 91686.15  | 100994    | 52175.94  | 61243.26  | 41044.35  | 56903.71  |

|           |           |           |           |           |           |           |           |           |           |
|-----------|-----------|-----------|-----------|-----------|-----------|-----------|-----------|-----------|-----------|
| LN259.000 | LN259.000 | LN259.000 | LN259.000 | LN259.000 | LN259.001 | LN259.001 | LN259.000 | LN259.000 | LN259.000 |
| 137562.3  | 49389.33  | 80746.98  | 111407.5  | 110852.9  | 22007.15  | 23901.12  | 72678.17  | 54983.76  | 61979.55  |
| 148770.2  | 47226.28  | 103607.7  | 119244.3  | 112748.2  | 28068.79  | 19626.63  | 70509.1   | 62383.69  | 52350.57  |
| 120446.9  | 43814.64  | 97887.35  | 120396.7  | 115759.7  | 27896.52  | 20275.61  | 65345.03  | 85387.14  | 68404.8   |
| 111392.1  | 54528.79  | 64658.86  | 136651.9  | 83026.64  | 23850.96  | 23139.45  | 69669.98  | 57871.37  | 60240.27  |
| 99032.95  | 50961.75  | 96994.63  | 104880.5  | 74809.12  | 27481.79  | 22849.62  | 115858.1  | 54939.33  | 57871.02  |



|           |           |           |           |           |           |           |           |           |           |
|-----------|-----------|-----------|-----------|-----------|-----------|-----------|-----------|-----------|-----------|
| LN259.001 | LN259.001 | LN259.001 | LN259.000 | LN259.000 | LN259.001 | LN259.001 | LN259.000 | LN259.000 | LN259.000 |
| 84201.13  | 34100.63  | 63176.16  | 113966.4  | 76502.31  | 51032.5   | 31204.47  | 97262.67  | 161940    | 47843.93  |
| 70030.86  | 42830.38  | 56859.72  | 108154.2  | 76204.02  | 55499.38  | 30836.17  | 87535.81  | 130873.4  | 96165.02  |
| 66397.41  | 35037.22  | 70426.55  | 87464.44  | 74606.41  | 69640.27  | 30691.59  | 94911.11  | 120588.9  | 44112.53  |
| 59175.38  | 40243.56  | 49003.33  | 100977.1  | 74567.07  | 52247.35  | 32148.89  | 81183.36  | 106205.8  | 73125.13  |
| 59318.08  | 38668.72  | 52561.62  | 98413.85  | 78666.24  | 48700.44  | 29364.21  | 131618.7  | 95846.16  | 73900.82  |

|           |           |           |           |           |           |           |           |           |           |
|-----------|-----------|-----------|-----------|-----------|-----------|-----------|-----------|-----------|-----------|
| LN259.000 | LN259.001 | LN259.001 | LN259.001 | LN259.000 | LN259.000 | LN259.000 | LN259.000 | LN259.918 | LN260.915 |
| 38178.53  | 55236.75  | 31538     | 51641.89  | 82084.58  | 74623.25  | 63083.36  | 108270.7  | 31815.11  | 127144.5  |
| 32912.95  | 50812.05  | 53797.25  | 80396.29  | 105378.5  | 108084.4  | 71590.16  | 116195    | 29482.89  | 111567.1  |
| 33464.56  | 57625.72  | 27396.69  | 54022.92  | 84102.55  | 115936.6  | 82288.91  | 83259.85  | 37761.37  | 108964.7  |
| 34817.93  | 55621.18  | 35320.61  | 50395.52  | 104449.6  | 94726.67  | 69400.27  | 76660.25  | 22816.6   | 105695.4  |
| 39010.74  | 62062.4   | 28897.98  | 62717.38  | 138010.2  | 88233.8   | 77817.04  | 78626.44  | 32933.39  | 92814.97  |

|           |           |           |           |           |           |           |           |           |           |
|-----------|-----------|-----------|-----------|-----------|-----------|-----------|-----------|-----------|-----------|
| LN261.134 | LN261.134 | LN261.134 | LN261.134 | LN261.134 | LN262.857 | LN262.911 | LN262.992 | LN262.992 | LN262.992 |
| 15300.17  | 15160.63  | 15853.7   | 14992.59  | 16016.24  | 51784.08  | 42055.26  | 43367.61  | 44561.85  | 38341.08  |
| 15210.08  | 15225.98  | 13076.46  | 16740.97  | 15412.98  | 48226.55  | 52274.12  | 45198.25  | 42074.12  | 39625.11  |
| 14464.55  | 12157.74  | 15232.87  | 15438.11  | 17801.14  | 49162.65  | 44369.09  | 47606.21  | 46107.11  | 42302.5   |
| 15661.75  | 14683.2   | 16963.56  | 14219.83  | 13613.8   | 16276.96  | 39726.22  | 46845.97  | 44115.78  | 42771.42  |
| 16395     | 12882.92  | 15133.88  | 15663.7   | 16242.59  | 18851.41  | 42503.68  | 45122.95  | 42544.78  | 43096.89  |

|           |           |           |           |           |           |           |           |           |           |
|-----------|-----------|-----------|-----------|-----------|-----------|-----------|-----------|-----------|-----------|
| LN262.992 | LN262.992 | LN262.992 | LN262.992 | LN262.992 | LN262.993 | LN262.993 | LN264.934 | LN264.934 | LN264.934 |
| 40744.76  | 26335.97  | 46482.6   | 30614.7   | 50852.98  | 26203.74  | 44129.35  | 22244.69  | 36451.69  | 33399.09  |
| 37313     | 32677.22  | 46091.54  | 28388.69  | 51239.91  | 24232.73  | 46402.22  | 23226.22  | 38173.41  | 31697.36  |
| 38166.41  | 29329.23  | 45157.07  | 31275.13  | 51349.87  | 26509.38  | 49405.04  | 33015.4   | 42924.7   | 35699.11  |
| 39236.19  | 24378.33  | 47890.13  | 30281.39  | 51563.59  | 25385.54  | 45752.28  | 24156.28  | 46041.63  | 49303.07  |
| 40326.75  | 34193.87  | 45875.59  | 31884.94  | 53133.79  | 26085.78  | 47420.4   | 22986.15  | 38993.93  | 31030.02  |

|           |           |           |           |           |           |           |           |           |           |
|-----------|-----------|-----------|-----------|-----------|-----------|-----------|-----------|-----------|-----------|
| LN264.934 |
| 35779.37  | 35095     | 40419.59  | 23520.87  | 38066.81  | 27427.32  | 40293.29  | 55938.6   | 50887.59  | 47735.48  |
| 33536.49  | 35998.05  | 39054.12  | 26528.38  | 39238.61  | 28186.53  | 40288.29  | 53145.64  | 51773.31  | 48014.63  |
| 36753.88  | 53985.03  | 45737.08  | 25946.55  | 34817.13  | 26002.25  | 43374.27  | 37066.24  | 57441.79  | 48796.44  |
| 38950.33  | 32022.01  | 48296.9   | 28173.76  | 50428.63  | 39313.48  | 41310.94  | 53528.75  | 51887.96  | 45331.27  |
| 37461.82  | 32537.72  | 35054.07  | 24805.86  | 37411.09  | 26015.12  | 41213.11  | 56732.11  | 48652.14  | 49280.2   |

|           |           |           |           |           |           |           |           |           |           |
|-----------|-----------|-----------|-----------|-----------|-----------|-----------|-----------|-----------|-----------|
| LN264.934 |
| 54484.96  | 48637.28  | 55879.82  | 31272.4   | 33898.88  | 43900.45  | 38738.82  | 40253.29  | 63865.34  | 43194.37  |
| 54932.26  | 45198.22  | 56784.4   | 31709.64  | 33367.02  | 44091.12  | 43182.29  | 43324.22  | 63761.42  | 42169.39  |
| 48444.75  | 51807.56  | 57237.61  | 33141.42  | 34968.25  | 42749.22  | 38303     | 40941.44  | 61678.46  | 44306.23  |
| 55724.95  | 47215.3   | 54714.39  | 35185.26  | 32530.45  | 41207.02  | 43937.11  | 41677.05  | 60320.69  | 45010.82  |
| 53399.2   | 50545.31  | 55128.85  | 36165.43  | 35291.32  | 41413.5   | 44946.31  | 39892.96  | 62356.51  | 47709.61  |

|           |           |           |           |           |           |           |           |           |           |
|-----------|-----------|-----------|-----------|-----------|-----------|-----------|-----------|-----------|-----------|
| LN264.991 | LN264.990 | LN264.991 |
| 33706.07  | 80137.06  | 87490.55  | 41713.02  | 83653.98  | 73563.32  | 66682.41  | 78408.48  | 156208.9  | 68146.56  |
| 27293.7   | 118117    | 59175.43  | 36798.1   | 83924.95  | 104827.8  | 117570.5  | 85200.13  | 146622.1  | 92210.3   |
| 22063.26  | 80520.71  | 61402.22  | 41028.32  | 80413.05  | 83294.42  | 106015.9  | 77522.72  | 127086    | 97460.3   |
| 20613.8   | 113277    | 81355.69  | 58728.44  | 132311.2  | 109705.4  | 65625.08  | 81560.14  | 123742.8  | 114167.7  |
| 27650.96  | 73732.19  | 70002.49  | 45698.39  | 61328.13  | 108544.8  | 61394.05  | 83562.11  | 106334    | 79530.38  |

|           |           |           |           |           |           |           |           |           |           |
|-----------|-----------|-----------|-----------|-----------|-----------|-----------|-----------|-----------|-----------|
| LN264.991 |
| 64785.08  | 38603.54  | 72055.49  | 55786.43  | 58251.36  | 102125.7  | 39180.58  | 52507.93  | 37760     | 63077.56  |
| 71131.35  | 35058.13  | 74013.82  | 54217.39  | 55101.67  | 91208.06  | 37714.72  | 50260.36  | 56247.17  | 62730.59  |
| 55728.96  | 47994.99  | 100212.3  | 48689.07  | 54112.78  | 103502.6  | 56465.91  | 43055.9   | 41338.7   | 40462.75  |
| 50895.46  | 38459.72  | 88615.11  | 49422.99  | 51106.73  | 124719.7  | 52495.32  | 61035.68  | 44603.34  | 53801.39  |
| 78367.58  | 40330.01  | 76998.16  | 66367.65  | 86933.19  | 134387.7  | 46424.83  | 55654.12  | 45455.8   | 62425.5   |



|           |           |           |           |           |           |           |           |           |           |
|-----------|-----------|-----------|-----------|-----------|-----------|-----------|-----------|-----------|-----------|
| LN264.991 | LN264.991 | LN264.991 | LN264.991 | LN264.991 | LN264.991 | LN264.990 | LN264.991 | LN264.991 | LN264.991 |
| 85508.9   | 44749.98  | 88479.81  | 106586.5  | 57247.16  | 74036.39  | 130043    | 50658.24  | 71884.03  | 43634.13  |
| 88396.71  | 42940.56  | 60705.57  | 84780.14  | 47584.56  | 69094.6   | 113719.2  | 66370.72  | 67668.73  | 51070.34  |
| 70293.78  | 45392.95  | 102070.8  | 102963.4  | 60300.94  | 80975.2   | 169373    | 61296.38  | 78336.73  | 46392.35  |
| 115929.8  | 60120.34  | 57523.59  | 75963.85  | 49696.24  | 77063.33  | 112488    | 55718.17  | 90449.07  | 59692.36  |
| 104286    | 54231.38  | 88953.57  | 90334.64  | 72670.18  | 74464.23  | 108812    | 66648.46  | 75519.65  | 51740.99  |

|           |           |           |           |           |           |           |           |           |           |
|-----------|-----------|-----------|-----------|-----------|-----------|-----------|-----------|-----------|-----------|
| LN264.991 | LN264.990 | LN264.991 |
| 48214.88  | 67208.39  | 81859.82  | 76010.86  | 99541.94  | 153152.5  | 85555.65  | 113649.4  | 156746.5  | 72934.59  |
| 50588.01  | 110872.8  | 96183.92  | 105336.5  | 83755.12  | 103328    | 112095.7  | 130291.6  | 105610.5  | 112037.2  |
| 56356.76  | 85891.11  | 100893.7  | 140987.3  | 98886.34  | 131067.1  | 95440.06  | 119380.2  | 118223.1  | 77943.14  |
| 56797.28  | 79073.9   | 111049.4  | 128153.6  | 91997.09  | 95878.52  | 104903.4  | 96986.18  | 160073.1  | 104261.2  |
| 49078.31  | 80774.6   | 88949.76  | 91472.66  | 82155.4   | 87047.53  | 106754    | 114503.3  | 106797.5  | 119058    |

|           |           |           |           |           |           |           |           |           |           |
|-----------|-----------|-----------|-----------|-----------|-----------|-----------|-----------|-----------|-----------|
| LN264.991 | LN264.990 | LN264.991 |
| 114523.1  | 158082.3  | 132185.8  | 68647.13  | 99707.11  | 56449.06  | 31932.69  | 64534.26  | 172273.6  | 102479.7  |
| 92615.8   | 121740.6  | 129002.5  | 62737.84  | 72016.38  | 74648.94  | 29241.95  | 51198.92  | 85659.95  | 104199.3  |
| 88811.24  | 144753    | 105183.6  | 50232.15  | 93256.83  | 69956.5   | 26082.84  | 47341.81  | 112670    | 82792.32  |
| 104798.9  | 92933.35  | 157380.4  | 49114.24  | 102393.3  | 65955.83  | 31689.31  | 69698.16  | 143858    | 100079    |
| 111156.9  | 151067.4  | 145299.2  | 59765.47  | 106485    | 49274.06  | 33354.22  | 77616.83  | 120973.8  | 113629.7  |

|           |           |           |           |           |           |           |           |           |           |
|-----------|-----------|-----------|-----------|-----------|-----------|-----------|-----------|-----------|-----------|
| LN264.991 |
| 68543.69  | 94149.16  | 61941.52  | 103444.5  | 91883.76  | 58626.83  | 88230.86  | 59141.87  | 136649.3  | 130661.9  |
| 70639.12  | 85553.31  | 86319.37  | 55819.89  | 85760.52  | 53276.03  | 111472.5  | 74547.51  | 77062.87  | 98398.14  |
| 77651.93  | 71384.72  | 46682.74  | 65231.41  | 80705.75  | 51920.83  | 88764.07  | 53291.6   | 89310.21  | 144317.6  |
| 70913.16  | 80530.85  | 48385.68  | 77271.6   | 74150.03  | 65480.52  | 74341.85  | 64225.1   | 129102.7  | 105068    |
| 74536.85  | 80261.57  | 42228.56  | 74803.97  | 126419.1  | 75227.03  | 124159.9  | 75795.79  | 119963.1  | 92156.99  |

|           |           |           |           |           |           |           |           |           |           |
|-----------|-----------|-----------|-----------|-----------|-----------|-----------|-----------|-----------|-----------|
| LN264.991 |
| 40449.42  | 60789.63  | 93339.34  | 55830.92  | 46096.86  | 48074.85  | 48319.66  | 50964.9   | 34765.74  | 42465.45  |
| 33500.25  | 48406.87  | 71320.86  | 48118.59  | 39891.18  | 67594.65  | 35562.63  | 53017.82  | 42146.86  | 27504.95  |
| 35033.67  | 67180.99  | 63555.72  | 46138.87  | 38890.43  | 41564.87  | 45302.7   | 59855.26  | 35638.26  | 31796.96  |
| 33665.68  | 54412.73  | 71663.64  | 52943.18  | 45935.17  | 48022.91  | 43728.78  | 86561.35  | 28002.81  | 31277.91  |
| 48700.33  | 47145.35  | 74951.49  | 63630.36  | 39733.81  | 51432.5   | 44827.68  | 65884.34  | 40619.56  | 31641.47  |

|           |           |           |           |           |           |           |           |           |           |
|-----------|-----------|-----------|-----------|-----------|-----------|-----------|-----------|-----------|-----------|
| LN264.991 |
| 37236.24  | 72716.54  | 42203.25  | 43363.61  | 82541.85  | 54183.79  | 73064.91  | 45413.15  | 29483.51  | 32585.82  |
| 37071.29  | 59344.98  | 32040.42  | 49255.97  | 87657.26  | 64829.39  | 86687.1   | 29834.44  | 34897.86  | 31438.31  |
| 30234.19  | 75572.15  | 33110.92  | 56407.96  | 75538.2   | 68589.35  | 86483.56  | 50763.83  | 37014.51  | 32904.94  |
| 28433.1   | 76372.87  | 37813.87  | 38470.84  | 79480.09  | 52910.06  | 75208.74  | 64039.69  | 28228.83  | 25433.99  |
| 28906.28  | 79874.44  | 39297.14  | 43805.66  | 75975.6   | 52904.81  | 62120.55  | 30328.93  | 27989.09  | 29634.58  |

|           |           |           |           |           |           |           |           |           |           |
|-----------|-----------|-----------|-----------|-----------|-----------|-----------|-----------|-----------|-----------|
| LN264.991 | LN264.991 | LN264.991 | LN265.851 | LN265.851 | LN265.851 | LN265.851 | LN265.875 | LN265.950 | LN265.950 |
| 78443.83  | 86980.57  | 35220.81  | 29581.46  | 11009.7   | 27274.99  | 12702.54  | 32429.45  | 44957.23  | 56344.45  |
| 78412.7   | 82777.83  | 37190.91  | 29101.49  | 10947.93  | 30074.9   | 10270.14  | 40600.37  | 79265.25  | 61293.92  |
| 74461.41  | 86217.45  | 32455.21  | 25458.73  | 12506.26  | 32128.12  | 12205.9   | 39212.03  | 48864.84  | 60178.72  |
| 74759.76  | 95252.11  | 32112.95  | 27648.37  | 9704.504  | 20850.08  | 13439.01  | 31251.38  | 44365.89  | 54441.1   |
| 73109.4   | 86851.21  | 30458.51  | 29316.25  | 13254.39  | 23309.08  | 11757.43  | 36322.93  | 37037.19  | 55043.15  |

|           |           |           |           |           |           |           |           |           |           |
|-----------|-----------|-----------|-----------|-----------|-----------|-----------|-----------|-----------|-----------|
| LN265.950 | LN265.949 |
| 85598.09  | 69475.53  | 90945.65  | 67165.62  | 56655.26  | 72949.15  | 73544.45  | 73557.75  | 61639.96  | 38845.92  |
| 82862.89  | 69274.85  | 94223.43  | 77451.71  | 58206     | 70727.1   | 66641.54  | 66797.84  | 70914.6   | 41369.36  |
| 81214.01  | 67165.23  | 91976.52  | 69458.25  | 54042.3   | 67921.6   | 71007     | 64390.16  | 62253.76  | 39582.17  |
| 74810.86  | 68185.5   | 93961.36  | 76784.87  | 56053.7   | 67705.47  | 64445.15  | 56316.68  | 59532.65  | 35790.51  |
| 71796     | 60392.6   | 86125.17  | 67836.41  | 51166.71  | 64811.54  | 63544.68  | 59055.98  | 51907.22  | 36155.28  |



|           |           |           |           |           |           |           |           |           |           |
|-----------|-----------|-----------|-----------|-----------|-----------|-----------|-----------|-----------|-----------|
| LN265.950 | LN265.950 | LN265.950 | LN265.950 | LN265.950 | LN265.950 | LN265.951 | LN265.950 | LN265.950 | LN266.985 |
| 65910.64  | 59215.49  | 87526.24  | 61316.79  | 46357.03  | 63639.83  | 55973.09  | 56954.45  | 68759.22  | 26381.92  |
| 67343.79  | 55949.04  | 97127.01  | 62176.83  | 46913.59  | 60782.22  | 62679.13  | 61377.61  | 62164.41  | 27704.28  |
| 71239.83  | 59271.38  | 87038.02  | 59965.05  | 42288.53  | 58986.47  | 58413.04  | 56810.46  | 63938.26  | 26386.55  |
| 68383.36  | 54260.93  | 88481.9   | 55323.22  | 41747.04  | 62110     | 51362.23  | 61654.44  | 63656.5   | 24602.38  |
| 62626.91  | 51242.42  | 80032.49  | 49675.66  | 46720.42  | 55722.84  | 54832.57  | 55379.14  | 60052.01  | 23459.54  |

|           |           |           |           |           |           |           |           |           |           |
|-----------|-----------|-----------|-----------|-----------|-----------|-----------|-----------|-----------|-----------|
| LN266.985 | LN266.985 | LN267.005 | LN267.005 | LN267.005 | LN267.005 | LN267.005 | LN267.847 | LN268.984 | LN268.985 |
| 37889.07  | 49962.09  | 49243.68  | 44415.9   | 37088.07  | 35961.1   | 35200.28  | 15162.87  | 47749.15  | 59687.75  |
| 44044.59  | 50949.85  | 53637.35  | 50410.62  | 38345.75  | 34436.44  | 33533.31  | 11826.59  | 58250.34  | 45132.64  |
| 34737.85  | 53145.09  | 54670.2   | 49639.54  | 40633.33  | 38520.43  | 35249.36  | 11080.36  | 53225.09  | 60588.73  |
| 40010.16  | 52225.15  | 53691.75  | 51944.33  | 46545.78  | 38321.28  | 38154.2   | 14068.19  | 46418.89  | 71881.12  |
| 38588.9   | 52095.34  | 31066.6   | 28801.63  | 15968.25  | 18243.68  | 35409.04  | 15476.23  | 47497.88  | 52414.59  |

|           |           |           |           |           |           |           |           |           |           |
|-----------|-----------|-----------|-----------|-----------|-----------|-----------|-----------|-----------|-----------|
| LN268.985 |
| 24210.09  | 42113.23  | 38222.41  | 30563.04  | 42035.23  | 55015.38  | 46216.66  | 68885.9   | 52070.4   | 33568.84  |
| 25120.29  | 34745.45  | 35535.8   | 24092.74  | 46983.62  | 38613.37  | 55240.42  | 67654.52  | 52105.67  | 42444.18  |
| 32707.64  | 36055.41  | 45728.78  | 22228.47  | 58617.95  | 29592.39  | 63280.5   | 65754.63  | 51067.17  | 43663.53  |
| 31484.85  | 40671.82  | 29078.39  | 18723.56  | 60252.59  | 62576     | 52308.88  | 65607.18  | 52908.18  | 42413.6   |
| 31308.94  | 35734.26  | 35227.71  | 23689.34  | 48872.65  | 38475.58  | 65016.79  | 56264.76  | 43991.36  | 40333.9   |

|           |           |           |           |           |           |           |           |           |           |
|-----------|-----------|-----------|-----------|-----------|-----------|-----------|-----------|-----------|-----------|
| LN268.985 |
| 86909.94  | 102485.5  | 80288.27  | 79227.94  | 43855.58  | 20962.3   | 51503.32  | 25090.36  | 55685.41  | 75153.36  |
| 84487.48  | 82094.94  | 53116.76  | 53863.76  | 40818.9   | 28418.15  | 50227.5   | 19042.33  | 60989.91  | 63931.64  |
| 102880.7  | 77636.22  | 51471.52  | 56848.83  | 44681.55  | 22269.36  | 62312.29  | 12819.06  | 86941.72  | 58034.34  |
| 77960.38  | 84291.18  | 39631.77  | 52535.93  | 25654.59  | 32291.1   | 73587.18  | 20297.02  | 47673.27  | 65769.48  |
| 110696    | 90678.15  | 47345.76  | 54792.14  | 36574.45  | 32531.91  | 45237.46  | 19693.07  | 73220.75  | 104184.2  |

|           |           |           |           |           |           |           |           |           |           |
|-----------|-----------|-----------|-----------|-----------|-----------|-----------|-----------|-----------|-----------|
| LN268.985 |
| 63953.39  | 59967.89  | 68498.66  | 35858.85  | 42354.19  | 89675.13  | 30287.43  | 64278.46  | 19698.24  | 49289.71  |
| 47958.19  | 53216.53  | 53272.77  | 26987.18  | 43200.37  | 83528.29  | 38538.19  | 58183.33  | 22957.44  | 39912.09  |
| 48065.69  | 50209.68  | 51759.61  | 33610.51  | 43932.87  | 64413.56  | 47350.68  | 75293.38  | 21145.64  | 36319.25  |
| 69113.28  | 68315.42  | 56960.24  | 23469.82  | 37183.51  | 91930.92  | 42811.24  | 45073.36  | 28143.03  | 31051.71  |
| 49125.12  | 55398.04  | 56848.93  | 23882.22  | 38281.82  | 108588.8  | 48793.24  | 62830.82  | 18690.01  | 35105.32  |

|           |           |           |           |           |           |           |           |           |           |
|-----------|-----------|-----------|-----------|-----------|-----------|-----------|-----------|-----------|-----------|
| LN268.985 |
| 66925.26  | 89824.7   | 16779.12  | 37663.66  | 42580.04  | 41307.86  | 56834.19  | 23024.39  | 70547.41  | 21501.95  |
| 75545.84  | 65919.65  | 19609.7   | 37734.89  | 35854.02  | 41436.73  | 50804.61  | 16854.1   | 58497.79  | 30703.21  |
| 120125.3  | 60221.62  | 17980.78  | 39518.51  | 32901.54  | 41659.27  | 71195.12  | 15314.67  | 89667.29  | 37701     |
| 80097.64  | 76175.54  | 18801.62  | 26624.01  | 31081.05  | 26033.86  | 52997.45  | 19605.79  | 70044.69  | 32254.81  |
| 68118.95  | 61907.72  | 14185.63  | 37598.86  | 29300.25  | 43697.39  | 52463.71  | 18204.78  | 65094.45  | 27181.72  |

|           |           |           |           |           |           |           |           |           |           |
|-----------|-----------|-----------|-----------|-----------|-----------|-----------|-----------|-----------|-----------|
| LN268.985 |
| 33692.6   | 45386.65  | 39816.27  | 24579.94  | 49941.59  | 36217.32  | 73149.85  | 39219.03  | 70482.77  | 27847.31  |
| 37284.6   | 36905.93  | 44126.13  | 23371.96  | 60941.6   | 27645.99  | 85869.06  | 36093.01  | 65295.34  | 30013     |
| 34118.34  | 51031.11  | 38378.8   | 27277     | 64336.24  | 38742.58  | 103478.8  | 52716.52  | 82450.98  | 27642.1   |
| 23385.22  | 38475.16  | 45158.77  | 19075.29  | 51487.39  | 25609.74  | 145524.6  | 33789.63  | 77544.32  | 32894.78  |
| 41743.79  | 34369.85  | 48664.44  | 21413.72  | 49815     | 35288.03  | 80555.87  | 37773.48  | 57265.83  | 61101.62  |

|           |           |           |           |           |           |           |           |           |           |
|-----------|-----------|-----------|-----------|-----------|-----------|-----------|-----------|-----------|-----------|
| LN268.985 |
| 68768.18  | 68543.25  | 20135.84  | 85879.95  | 42919.94  | 42738.89  | 46976.56  | 48700.99  | 40924.45  | 55654.59  |
| 64410.13  | 81610.5   | 21364.57  | 75361.22  | 42239.91  | 45872.07  | 48467.19  | 55981.39  | 53121.16  | 66836.33  |
| 74102.93  | 86480.17  | 20266.63  | 61327.35  | 47825.41  | 48041.03  | 44695.51  | 55953.42  | 47668.46  | 65945.62  |
| 73703.64  | 86482.03  | 23481.95  | 69921.05  | 47418.66  | 38260.36  | 36581.49  | 71563.52  | 46910.11  | 59129.22  |
| 76611.42  | 98534.27  | 19202.42  | 92038.15  | 53446.02  | 45841     | 46803.73  | 64719.55  | 58459.47  | 68617.26  |



|           |           |           |           |           |           |           |           |           |           |
|-----------|-----------|-----------|-----------|-----------|-----------|-----------|-----------|-----------|-----------|
| LN268.985 |
| 53559.92  | 37253.1   | 23021.77  | 19058.18  | 39934.77  | 63975.74  | 46685.31  | 35753.6   | 33718.88  | 25852.64  |
| 41370.72  | 36913.99  | 21902.47  | 18106.6   | 34760.39  | 60646.38  | 28905.72  | 43620.49  | 34274.43  | 22261.54  |
| 35728.67  | 35862.64  | 23281.79  | 17144.33  | 39084.81  | 56000.76  | 33330.7   | 44360.4   | 33114.3   | 21277.38  |
| 52114.97  | 27997.5   | 20451.04  | 20757.23  | 34268.9   | 59048.74  | 35884.84  | 35734.62  | 45797.11  | 21946.2   |
| 56611.38  | 29549.16  | 18435.27  | 14674.42  | 32149.98  | 56060.98  | 50426.25  | 52496.69  | 36334.89  | 18679.77  |

| LN268.985 | LN269.212 | LN269.211 | LN269.212 |
|-----------|-----------|-----------|-----------|-----------|-----------|-----------|-----------|-----------|-----------|-----------|
| 16517.61  | 32298.24  | 53896.34  | 17422.46  | 19848.03  | 27386.76  | 76252.31  | 15932.81  | 53912.23  | 38093.58  |           |
| 24534.7   | 34693.25  | 59426.2   | 21630.07  | 21015.37  | 37538     | 66393.66  | 12572.05  | 46994.58  | 37033.49  |           |
| 22604.74  | 29205.42  | 48419.71  | 24556.91  | 21480.97  | 37910.32  | 69198.29  | 13387.96  | 50463.81  | 33518.8   |           |
| 16691.7   | 37047.33  | 52381.6   | 18291.98  | 19497.77  | 39620.14  | 59290.78  | 15734.63  | 54597.75  | 38794.38  |           |
| 17914.83  | 34521.39  | 66229.07  | 20489.06  | 17337.14  | 35924.31  | 95822.69  | 14744.87  | 55479.08  | 40721.57  |           |

|           |           |           |           |           |           |           |           |           |           |
|-----------|-----------|-----------|-----------|-----------|-----------|-----------|-----------|-----------|-----------|
| LN269.212 |
| 39100.7   | 35394.33  | 38664.64  | 34899.77  | 25784.43  | 33935.62  | 28239.98  | 32872.44  | 38206.04  | 22133.93  |
| 30688.34  | 37524.25  | 39381.97  | 34079.33  | 41122.34  | 30840.38  | 46408.06  | 38944.45  | 31275.17  | 21181.66  |
| 36439.44  | 35826.43  | 31099.51  | 32737.19  | 34430.66  | 33337.21  | 39583.13  | 42001.23  | 31333.47  | 20542.87  |
| 37567.37  | 38903.62  | 33118.89  | 34393.59  | 37743.12  | 35792.92  | 44143.09  | 41069.39  | 33262.73  | 22374.12  |
| 36524.28  | 40879.66  | 35001.09  | 36024.58  | 38427.06  | 36811.18  | 46937.29  | 41514.57  | 33610.28  | 23531.23  |

|           |           |           |           |           |           |           |           |           |           |
|-----------|-----------|-----------|-----------|-----------|-----------|-----------|-----------|-----------|-----------|
| LN269.212 |
| 47337     | 34917.65  | 40879.67  | 28130.01  | 31597.25  | 22693.81  | 25417.63  | 38931.05  | 44913.78  | 28181.45  |
| 35495.14  | 41132.54  | 42544.62  | 32853.11  | 29122.34  | 25731.36  | 27448.06  | 32207.08  | 27914.28  | 29891.6   |
| 34397.32  | 30888.69  | 38025.48  | 29337.02  | 35727.16  | 24361.7   | 34270.66  | 34930.9   | 27849.65  | 30893.13  |
| 36619.98  | 34262.2   | 42875.95  | 32168.44  | 34587.89  | 27494.09  | 36455.66  | 38974.56  | 31969.01  | 32571.27  |
| 38335.08  | 35789.55  | 43353.84  | 33091.25  | 36395.12  | 24672.77  | 38978.43  | 39292.71  | 33754.21  | 38929.58  |

|           |           |           |           |           |           |           |           |           |           |
|-----------|-----------|-----------|-----------|-----------|-----------|-----------|-----------|-----------|-----------|
| LN269.212 |
| 39665.81  | 30974.21  | 33923     | 35689.54  | 30691.37  | 25051.45  | 38787.57  | 35869.56  | 28173.88  | 31053.18  |
| 30624.4   | 34896.78  | 40410.73  | 36869.86  | 37748.49  | 30411.41  | 33340.78  | 32632.67  | 31974.17  | 33960.56  |
| 35464.34  | 39763.9   | 37699.95  | 34130.39  | 38927.84  | 27766.92  | 37738.31  | 34490.82  | 33259.37  | 38608.94  |
| 40006.41  | 45782.49  | 40978.17  | 33767.44  | 40223.63  | 30031.27  | 43673.07  | 34152.08  | 30719.56  | 36928.65  |
| 40741.87  | 47853.74  | 42845.48  | 36771.91  | 41126.88  | 29822.67  | 43837.41  | 35970.62  | 31735.58  | 39268.7   |

|           |           |           |           |           |           |           |           |           |           |
|-----------|-----------|-----------|-----------|-----------|-----------|-----------|-----------|-----------|-----------|
| LN269.212 |
| 35906.41  | 36881.12  | 27874.53  | 31891.74  | 47217.23  | 35800.56  | 33298.84  | 33161.8   | 35744.72  | 33908.09  |
| 26197.38  | 39126.01  | 35196.49  | 26289.29  | 29686.07  | 50754.58  | 39508.44  | 33907.28  | 35652.8   | 30071.99  |
| 31644.14  | 31346.59  | 36722.17  | 30775.96  | 33580.28  | 39237.3   | 36091.25  | 35923.97  | 36781.87  | 30055.21  |
| 33621.14  | 32950.68  | 38123.38  | 34674.75  | 36821.69  | 43262.1   | 35666.46  | 35969.7   | 39381.8   | 35358.65  |
| 35541.1   | 32867.56  | 38920.09  | 34211.55  | 34554.97  | 46676.18  | 39562.38  | 36972.63  | 38019.84  | 35867.06  |

|           |           |           |           |           |           |           |           |           |           |
|-----------|-----------|-----------|-----------|-----------|-----------|-----------|-----------|-----------|-----------|
| LN269.212 |
| 22634.18  | 32310.93  | 34097.41  | 27522.21  | 40132.43  | 38933.8   | 33823.59  | 34857.7   | 17226.09  | 28155.85  |
| 18837.02  | 37485.14  | 16715.88  | 31399.73  | 27589.09  | 40553.56  | 30383.6   | 35415.59  | 22151.33  | 29873.83  |
| 20527.41  | 35635.39  | 20903.96  | 34830.5   | 32565.36  | 39407.93  | 36730.85  | 36246.35  | 18588.13  | 33136     |
| 18603.4   | 41160.77  | 23237.89  | 37231.86  | 32390.42  | 43613.1   | 39415.87  | 37488.22  | 20370.86  | 32883.86  |
| 20601.65  | 38078.55  | 25340.74  | 39558.81  | 34954.51  | 41249.27  | 42089.71  | 40612.16  | 21084.26  | 36086.88  |

|           |           |           |           |           |           |           |           |           |           |
|-----------|-----------|-----------|-----------|-----------|-----------|-----------|-----------|-----------|-----------|
| LN269.212 |
| 36493.81  | 29629.38  | 32405.24  | 26308.12  | 37388.54  | 15490.36  | 32634.38  | 31896.69  | 17393.44  | 26523.7   |
| 40060.64  | 26836.76  | 29206.8   | 33483.36  | 30397.8   | 23603.32  | 38100.85  | 33363.98  | 14175.67  | 24537.38  |
| 44706.27  | 32490.35  | 36976.27  | 30055.57  | 40663.22  | 20414.55  | 45951.53  | 34464.51  | 18395.99  | 24940.79  |
| 44337.73  | 37546.36  | 38704.57  | 32536.51  | 42301.32  | 22615.48  | 48243.04  | 35127.71  | 19235.84  | 27728.07  |
| 47944.19  | 38501.29  | 39618.79  | 33241.47  | 44479.79  | 20392.69  | 49310.29  | 37149.06  | 18910.26  | 25978.83  |



|           |           |           |           |           |           |           |           |           |           |
|-----------|-----------|-----------|-----------|-----------|-----------|-----------|-----------|-----------|-----------|
| LN269.212 |
| 33644.3   | 31932.48  | 37670.31  | 30365.66  | 40037.13  | 32599.33  | 40122.98  | 37490.48  | 33499.1   | 37505.17  |
| 31249.41  | 16937.95  | 47248.49  | 40924.35  | 45381.89  | 34519.82  | 33152.24  | 32547.87  | 31034.6   | 31560.4   |
| 34366.62  | 21353.98  | 41063.49  | 41172.47  | 40474.61  | 36550.71  | 32958.9   | 39689.11  | 30971.98  | 33349.32  |
| 36079.39  | 20562.18  | 44273.53  | 45573.68  | 42995.26  | 38429.4   | 35643.74  | 39936.45  | 36045.97  | 36898.8   |
| 36971.84  | 21578.48  | 47278.1   | 41074.02  | 47977.41  | 37723.08  | 36818.89  | 43195.32  | 40821.49  | 36818.39  |

|           |           |           |           |           |           |           |           |           |           |           |
|-----------|-----------|-----------|-----------|-----------|-----------|-----------|-----------|-----------|-----------|-----------|
| LN269.212 | LN270.980 | LN270.980 | LN270.980 |
| 56315.19  | 28838.35  | 28885.94  | 31530.15  | 29971.61  | 27248.91  | 34750.69  | 32585.69  | 32753.48  | 27634.12  |           |
| 42789.26  | 35387.07  | 38486.07  | 32180.02  | 28103.19  | 26834.57  | 32408.93  | 30543.23  | 30469.42  | 28784.02  |           |
| 50210.7   | 38076.37  | 33655.56  | 35069.34  | 33362.34  | 33464.64  | 34170.36  | 34491.15  | 31161.13  | 27909.08  |           |
| 54384.22  | 39724.53  | 35623.54  | 37594.93  | 37254.18  | 36062.14  | 37225.23  | 33389.61  | 32600.73  | 27902.04  |           |
| 56311.77  | 43906.93  | 39914.07  | 38719.21  | 36462.17  | 35371.14  | 40065.97  | 31786.31  | 29758.98  | 29129.36  |           |

|           |           |           |           |           |           |           |           |           |           |
|-----------|-----------|-----------|-----------|-----------|-----------|-----------|-----------|-----------|-----------|
| LN270.980 | LN271.923 | LN272.98_ | LN272.98_ |
| 37537.69  | 27950.76  | 17612.14  | 35466.31  | 29494.13  | 26227.95  | 25851.92  | 17597.8   | 33876.59  | 50942.25  |
| 39591.16  | 28480.81  | 19378.09  | 35195.91  | 33040.35  | 24824.19  | 24582.85  | 15220.2   | 16681.76  | 25973.94  |
| 38031.2   | 28402.56  | 19000.87  | 38434.4   | 35401.61  | 25935.37  | 28733.75  | 15707.51  | 36857.93  | 49115.86  |
| 41080.79  | 28612.28  | 19929.65  | 37588.69  | 37688.98  | 28445.19  | 28201.4   | 12458.39  | 36540.54  | 53707.64  |
| 37232.09  | 30579.18  | 18836.21  | 39251.85  | 33094.56  | 28527.88  | 26378.76  | 11466.93  | 34656.72  | 49912.13  |

|           |           |           |           |           |           |           |           |           |           |           |
|-----------|-----------|-----------|-----------|-----------|-----------|-----------|-----------|-----------|-----------|-----------|
| LN272.98_ | LN273.016 | LN274.858 | LN274.889 |
| 39897.47  | 29925.83  | 37576.21  | 66592.95  | 41789.86  | 29182.92  | 41895.47  | 27432.48  | 14121.43  | 14036.46  |           |
| 15788.88  | 30783.33  | 34299.28  | 67709.42  | 43513.62  | 34888.49  | 41474.55  | 29744.48  | 9999.08   | 15694.16  |           |
| 39377.19  | 29082.25  | 35608.95  | 68935.6   | 46339.5   | 27695.56  | 41223.49  | 28610.63  | 15959.24  | 18039.1   |           |
| 37060.49  | 33256.46  | 36139.52  | 65642.75  | 44958.43  | 31977.77  | 45452.53  | 27900.81  | 19507.58  | 17791.63  |           |
| 36266.59  | 33782.8   | 33754.91  | 68316.44  | 42721.92  | 27942.81  | 44573.49  | 29037.93  | 14907.65  | 19481.66  |           |

|           |           |           |           |           |           |           |           |           |           |
|-----------|-----------|-----------|-----------|-----------|-----------|-----------|-----------|-----------|-----------|
| LN274.960 | LN274.975 |
| 12513.13  | 26160.68  | 15192.34  | 25891.07  | 23835.78  | 19893.05  | 33019.46  | 28798.1   | 27560.02  | 24149.35  |
| 11286.87  | 24752.71  | 16756.09  | 23668.31  | 25415.41  | 20484.76  | 35759.54  | 30216.68  | 29654.99  | 23821.45  |
| 9615.634  | 27981.48  | 18433.27  | 22521.65  | 22089.36  | 18457.55  | 33909.68  | 26673.7   | 26585.11  | 21686.99  |
| 10967.32  | 24547.91  | 14672.14  | 24051.23  | 24468.03  | 18822.48  | 33260.71  | 32312.7   | 24784.05  | 25303.04  |
| 11810.47  | 26330.96  | 14977.77  | 24843.57  | 22228.52  | 16833.94  | 36485.32  | 28419.7   | 28891.96  | 21563.84  |

|           |           |           |           |           |           |           |           |           |           |
|-----------|-----------|-----------|-----------|-----------|-----------|-----------|-----------|-----------|-----------|
| LN274.975 | LN275.113 | LN275.113 |
| 24315.75  | 26722.04  | 17404.67  | 33339.69  | 36390.85  | 20757.85  | 25002.28  | 30039.15  | 16570.16  | 20895.91  |
| 25084.09  | 26429.47  | 16762.4   | 36994.02  | 37707.93  | 20227.41  | 24156.7   | 30204.08  | 16250.7   | 18174.96  |
| 25408.86  | 28757.36  | 18420.52  | 31602.03  | 37104.48  | 18978.95  | 22900.45  | 27648.3   | 18527.22  | 19381.82  |
| 27949.07  | 28632.18  | 16599.29  | 33322.62  | 38464.58  | 21308.22  | 26671.16  | 28403.97  | 16059.94  | 18337.7   |
| 25461.06  | 26614.91  | 18181.97  | 31668.44  | 36172.07  | 21411.41  | 25894.89  | 25776.27  | 15501     | 17464.14  |

|           |           |           |           |           |           |           |           |           |           |
|-----------|-----------|-----------|-----------|-----------|-----------|-----------|-----------|-----------|-----------|
| LN275.149 | LN275.149 | LN275.879 | LN275.905 | LN276.990 | LN276.991 | LN276.991 | LN276.991 | LN276.991 | LN276.991 |
| 23102.43  | 16288.42  | 85129.04  | 60276.6   | 76037.6   | 70918.17  | 41353.73  | 63323.94  | 55649.22  | 19500.4   |
| 25466.92  | 17745.79  | 87278.71  | 60969.11  | 98067.05  | 70340.63  | 56453.12  | 52442.96  | 47520.02  | 14752.82  |
| 22980.05  | 15926.05  | 93858.29  | 45930.5   | 82291.31  | 49122.78  | 42478.05  | 61010.98  | 50506.92  | 18322.82  |
| 23716.36  | 14462.26  | 58361.31  | 65835.36  | 128214.2  | 66388.63  | 45155.51  | 70361.34  | 60716.6   | 14639.73  |
| 21638.99  | 14795.83  | 50610.22  | 69114.65  | 130647.2  | 57822.3   | 44384.08  | 66858.12  | 56647.91  | 17557.31  |

|           |           |           |           |           |           |           |           |           |           |
|-----------|-----------|-----------|-----------|-----------|-----------|-----------|-----------|-----------|-----------|
| LN276.991 |
| 87208.61  | 99865.34  | 25362.87  | 72237.58  | 171043.8  | 103146.6  | 90433.04  | 50434.26  | 63247.79  | 118727.6  |
| 80212.27  | 77196.67  | 49126.46  | 50754.34  | 112482.7  | 86084.24  | 58549.44  | 40250.04  | 60041.81  | 111198.3  |
| 89248.46  | 95276.9   | 25304.26  | 66095.78  | 91989.44  | 60120.74  | 77434.09  | 62259.21  | 88587.89  | 115590.2  |
| 79724.1   | 84127.46  | 25035.07  | 50503.47  | 89759.24  | 50662.06  | 78546.32  | 39153.18  | 62595.66  | 166678.4  |
| 79938.06  | 95569.51  | 33532.41  | 62206.83  | 95064.91  | 70590.53  | 78096.34  | 52781.17  | 53944.12  | 154686.8  |



|           |           |           |           |           |           |           |           |           |           |
|-----------|-----------|-----------|-----------|-----------|-----------|-----------|-----------|-----------|-----------|
| LN276.991 |
| 73061.06  | 37355.04  | 49357.81  | 48576.8   | 131635.5  | 89155.62  | 101507.3  | 71277.24  | 18657.29  | 63271.15  |
| 93792.05  | 36234.02  | 36619.04  | 32466.98  | 77270.17  | 62284.74  | 100200.1  | 107230.9  | 25670.85  | 59655.13  |
| 87875.35  | 29701.74  | 33583.81  | 36964.48  | 83293.65  | 82826.97  | 106282.8  | 68884.63  | 25233.78  | 68638.34  |
| 134505.2  | 34923.96  | 34574.9   | 37954.42  | 115457.8  | 65948.35  | 108983.3  | 92526.23  | 26253.05  | 59658.92  |
| 87143.5   | 26786.61  | 42278.2   | 31698.68  | 109798.4  | 97678.48  | 95975.67  | 77219.03  | 31794.32  | 59672.56  |

|           |           |           |           |           |           |           |           |           |           |
|-----------|-----------|-----------|-----------|-----------|-----------|-----------|-----------|-----------|-----------|
| LN276.991 |
| 88864.87  | 98809.07  | 66116.86  | 72838.49  | 58105.14  | 47951.09  | 93779.66  | 150258.8  | 40331.22  | 31462.21  |
| 119713    | 135992    | 63604.46  | 73075.77  | 50948.03  | 50503.82  | 71254.9   | 114142.7  | 30410.39  | 26735.12  |
| 102521    | 82943.03  | 87030.2   | 118398.9  | 70085.61  | 62776.22  | 63435.14  | 100201.2  | 25351.76  | 31774.19  |
| 101881.8  | 131132.6  | 57206.87  | 63131.97  | 45784.62  | 72735.38  | 101139.5  | 139161.7  | 36159.24  | 30024.67  |
| 136861    | 107346.3  | 64422.22  | 86754.05  | 76782.78  | 59875.06  | 81303.61  | 173067.2  | 28147.84  | 20525.17  |

|           |           |           |           |           |           |           |           |           |           |
|-----------|-----------|-----------|-----------|-----------|-----------|-----------|-----------|-----------|-----------|
| LN276.991 |
| 189438.3  | 34660.02  | 179325.9  | 55394.22  | 124031.5  | 45134.33  | 142939    | 125334.7  | 82958.26  | 44116.64  |
| 127718.2  | 30796.58  | 105214.5  | 48149.62  | 115613.1  | 46539.26  | 103502.5  | 80145.76  | 95392.68  | 58192.79  |
| 122721.9  | 42873.15  | 134249.3  | 51980.02  | 117071.5  | 52814.78  | 99016.47  | 148026.4  | 110308    | 51485.57  |
| 110615.8  | 35690.39  | 197061.3  | 80644.72  | 73985.48  | 45884.09  | 141648.3  | 78583.41  | 96851     | 63053.35  |
| 218137.2  | 32892.61  | 97807.84  | 47541.02  | 131231.4  | 40665.11  | 134117    | 69827.82  | 74672.2   | 75510.68  |

|           |           |           |           |           |           |           |           |           |           |
|-----------|-----------|-----------|-----------|-----------|-----------|-----------|-----------|-----------|-----------|
| LN276.991 |
| 105517.8  | 89093.02  | 71069.09  | 89278.27  | 79018.16  | 56685.8   | 53590.08  | 129552.7  | 46762.54  | 80736.39  |
| 89683.53  | 71211.49  | 75685.41  | 116561.4  | 52828.31  | 52999.27  | 51853.57  | 168856.3  | 46885.56  | 92273.66  |
| 112708.7  | 115987.4  | 62482.38  | 87707.14  | 66044.01  | 62739.37  | 54910.33  | 158878.4  | 49602.95  | 74127     |
| 144910.6  | 76701.58  | 63086.53  | 85974.89  | 83051.16  | 43373.41  | 55510.82  | 168497    | 60164.56  | 49867.47  |
| 79690.58  | 76661.08  | 44657.42  | 131043.2  | 70846.69  | 53027.27  | 60877.33  | 116109.7  | 62292.6   | 49719.83  |

|           |           |           |           |           |           |           |           |           |           |
|-----------|-----------|-----------|-----------|-----------|-----------|-----------|-----------|-----------|-----------|
| LN276.991 |
| 54432.01  | 39640.24  | 150129.9  | 58819.94  | 42899.41  | 109417.8  | 105871.9  | 76315.75  | 25474.87  | 37696.11  |
| 58904.05  | 21231.19  | 152940    | 73140.47  | 57047.82  | 81567.2   | 116882.2  | 82050.64  | 35518.47  | 37600.95  |
| 51608.08  | 20306.4   | 125269.6  | 63916.56  | 61924.3   | 90206.12  | 138937    | 86280.85  | 21146.32  | 49219.52  |
| 38391.63  | 19975.98  | 138976.3  | 43818.64  | 62606.81  | 102854.8  | 115705.8  | 95828.25  | 23835.01  | 46299.77  |
| 45774.97  | 28673.34  | 152843    | 80499.12  | 42956.29  | 68606.36  | 89972.68  | 61448.49  | 28464.44  | 44060.49  |

|           |           |           |           |           |           |           |           |           |           |
|-----------|-----------|-----------|-----------|-----------|-----------|-----------|-----------|-----------|-----------|
| LN276.991 |
| 63603.98  | 78596.56  | 48969.78  | 132472.8  | 87821.09  | 125661.8  | 70985.98  | 56025.31  | 101170.9  | 94939.13  |
| 65514.05  | 98782.1   | 60670.58  | 107489.4  | 111747.3  | 79310.92  | 60105.91  | 59148.55  | 85546.75  | 110141.3  |
| 53708.19  | 55961.36  | 48352.55  | 93655.82  | 93388.77  | 66239.39  | 55747     | 47106.78  | 109610.7  | 84645.73  |
| 64094.24  | 95265.52  | 55199.75  | 95167.18  | 91340.81  | 90760.85  | 68512.35  | 53998.89  | 76019.08  | 119526.7  |
| 70963.27  | 80951.04  | 56313.74  | 85297.25  | 83419.47  | 60700.59  | 73995.29  | 66846.32  | 98046.5   | 66655.08  |

|           |           |           |           |           |           |           |           |           |           |
|-----------|-----------|-----------|-----------|-----------|-----------|-----------|-----------|-----------|-----------|
| LN276.991 | LN277.128 | LN277.128 | LN277.128 |
| 91754.79  | 45715.42  | 87031.45  | 142625.6  | 83303.47  | 55597.04  | 74880.88  | 26113.48  | 17564.6   | 20125.19  |
| 89288.97  | 58000.62  | 73945.54  | 131528    | 61444.52  | 65011.84  | 68959.11  | 23435.1   | 18013.45  | 20861.9   |
| 133431    | 42340.11  | 136484.8  | 136918.6  | 76555.99  | 63938.13  | 58273.13  | 24235.62  | 16504.79  | 20473.78  |
| 109161    | 58540.86  | 102346.4  | 173091.8  | 70128.93  | 76572.19  | 74675.11  | 24552.56  | 15306.75  | 17924.56  |
| 108449.1  | 45306.5   | 73695.89  | 139830    | 88699.88  | 56155.78  | 95455.7   | 25246.48  | 15749.99  | 19515.21  |

|           |           |           |           |           |           |           |           |           |           |
|-----------|-----------|-----------|-----------|-----------|-----------|-----------|-----------|-----------|-----------|
| LN277.128 | LN277.876 | LN278.902 | LN278.909 | LN280.966 | LN280.966 | LN280.966 | LN280.966 | LN280.966 | LN280.966 |
| 16488.78  | 11080.11  | 13639.65  | 13155.65  | 44840.17  | 61355.07  | 52680.63  | 39829.69  | 35585.99  | 42789.58  |
| 14960.67  | 10684.57  | 12706.87  | 14549.48  | 49559.06  | 59420.34  | 52783.56  | 36480.55  | 37910.97  | 43997.18  |
| 15593.86  | 11238.52  | 15284.78  | 14405.58  | 46025.75  | 55400.23  | 56160.61  | 39999.83  | 38198.14  | 45450.8   |
| 16427.31  | 14037.55  | 16562.09  | 13488.72  | 50712.72  | 54889.34  | 52557.29  | 36570     | 38745.27  | 45298.32  |
| 16885.15  | 16400.88  | 18691.03  | 12559.55  | 44462.37  | 58537     | 54946.89  | 39032.31  | 36181.01  | 48566.45  |



|           |           |           |           |           |           |           |           |           |           |
|-----------|-----------|-----------|-----------|-----------|-----------|-----------|-----------|-----------|-----------|
| LN280.966 | LN280.966 | LN280.966 | LN280.966 | LN280.966 | LN280.984 | LN280.984 | LN280.984 | LN280.984 | LN280.985 |
| 41145.26  | 48264.7   | 58332.77  | 37529.53  | 36970.28  | 37246.3   | 15293.08  | 17194.98  | 11416.32  | 12458.1   |
| 41264     | 49154.86  | 64353.27  | 33002.58  | 32831.1   | 36133.78  | 14094.04  | 18959.75  | 13771.74  | 11514.51  |
| 40106.14  | 50903.64  | 62608.38  | 33352.98  | 37430.69  | 41701.44  | 15200.48  | 18932.09  | 12309.84  | 13272.33  |
| 46594.61  | 50236.4   | 61273.87  | 37681.32  | 38557.81  | 34395.01  | 14830.68  | 20848.8   | 13052.42  | 11678.44  |
| 41623.83  | 52326     | 61712.4   | 37872.44  | 38724.76  | 36381.91  | 13720.38  | 18014.32  | 11455.84  | 11471.68  |

|           |           |           |           |           |           |           |           |           |           |
|-----------|-----------|-----------|-----------|-----------|-----------|-----------|-----------|-----------|-----------|
| LN280.984 | LN280.985 | LN280.984 | LN280.984 | LN280.985 | LN280.984 | LN280.985 | LN280.984 | LN280.985 | LN280.984 |
| 30296     | 17149.29  | 19306.85  | 20420.76  | 16728.23  | 25161.31  | 26514.8   | 15333.92  | 23799.04  | 34179.87  |
| 32789.91  | 18273.7   | 22993.55  | 23254.43  | 18299.59  | 24143.1   | 28851.44  | 14804.11  | 23951.45  | 37431.15  |
| 30993.47  | 16608.7   | 20981.37  | 21609.46  | 17168.09  | 25199.86  | 27088.58  | 17714.64  | 23901.61  | 34444.29  |
| 30591.39  | 16047.72  | 20081.68  | 22565.29  | 16913.88  | 25474.52  | 27872.14  | 16576.18  | 25283.13  | 33614.57  |
| 34553.91  | 16669.1   | 21530.99  | 17712.54  | 17629.7   | 25222.91  | 27383.22  | 15833.34  | 22299.58  | 36233.46  |

|           |           |           |           |           |           |           |           |           |           |
|-----------|-----------|-----------|-----------|-----------|-----------|-----------|-----------|-----------|-----------|
| LN280.984 | LN280.984 | LN280.984 | LN280.985 | LN280.984 | LN280.984 | LN280.984 | LN280.984 | LN280.984 | LN280.984 |
| 28723.29  | 25739.91  | 41131.03  | 11450.3   | 15219.22  | 20660.94  | 20103.76  | 13796.41  | 33411.7   | 19049.44  |
| 29283.12  | 25277.28  | 45343.92  | 11962.62  | 14650.47  | 21720.57  | 18737.3   | 13560.89  | 37252.95  | 17543.34  |
| 33716.49  | 25964.07  | 40572.59  | 13402.33  | 15132.41  | 20310.58  | 18461.23  | 14155.48  | 37615.42  | 17466.74  |
| 28322.98  | 25894.28  | 46850.28  | 11865.49  | 13497.21  | 22552.3   | 18133.44  | 13315.06  | 37418.6   | 15061.47  |
| 30818.41  | 26173.47  | 40477.44  | 12395.47  | 13884.49  | 20388.68  | 16262.52  | 13138.02  | 35293.29  | 19153.22  |

|           |           |           |           |           |           |           |           |           |           |
|-----------|-----------|-----------|-----------|-----------|-----------|-----------|-----------|-----------|-----------|
| LN280.985 | LN280.984 |
| 25261.27  | 40473.08  | 33213.79  | 42662.28  | 26267.33  | 17923.89  | 25186.21  | 25452.3   | 25134.55  | 37580.46  |
| 25703.34  | 40863.75  | 34767.29  | 46583.82  | 25637.5   | 19622.76  | 23966.85  | 24876.02  | 25015.29  | 34515.7   |
| 23974.9   | 39718.93  | 33824.51  | 39215.41  | 27196.08  | 20434.68  | 25585.56  | 26684.88  | 24675.64  | 34493.03  |
| 26236.97  | 42141.22  | 35173.49  | 43211.59  | 29951.09  | 21712.49  | 27585.82  | 27379.12  | 23548.59  | 32104.27  |
| 25534.71  | 39262.61  | 36634     | 47578.08  | 28041.52  | 21145.92  | 26987.14  | 26768.79  | 24560.86  | 36950.75  |

|           |           |           |           |           |           |           |           |           |           |
|-----------|-----------|-----------|-----------|-----------|-----------|-----------|-----------|-----------|-----------|
| LN280.985 | LN280.984 | LN280.984 | LN280.984 | LN280.985 | LN280.984 | LN280.984 | LN280.984 | LN280.984 | LN280.984 |
| 13947.62  | 23417.96  | 13841.89  | 27820.56  | 24675.32  | 38735.5   | 20106.22  | 33628.19  | 18354.97  | 33099.55  |
| 15167.57  | 25581.52  | 14120.72  | 25732.91  | 23049.97  | 39949.29  | 19203.71  | 30579.83  | 20231.75  | 32024.86  |
| 16918.69  | 23357.15  | 14354.02  | 25489.54  | 27693.7   | 40602.47  | 19312.19  | 31424.33  | 19342.2   | 40179.92  |
| 16847.42  | 26186.65  | 13149.86  | 23058.26  | 25377.54  | 44202.67  | 16280.49  | 29389.92  | 20719     | 33666.92  |
| 18002.39  | 22623.27  | 14410.47  | 24975.21  | 20644.26  | 40090.25  | 16476.57  | 32783.53  | 18108.08  | 34361.06  |

|           |           |           |           |           |           |           |           |           |           |
|-----------|-----------|-----------|-----------|-----------|-----------|-----------|-----------|-----------|-----------|
| LN280.984 | LN280.984 | LN280.985 | LN280.984 |
| 38697.85  | 34711.51  | 12929.47  | 29153.49  | 28266.81  | 15632.72  | 33371.91  | 19782.03  | 34930.21  | 17708.13  |
| 36653     | 33594.34  | 13251.1   | 34180.91  | 27360.31  | 16847.33  | 31723.36  | 17986.56  | 36035.67  | 19672.88  |
| 34269.68  | 32160.41  | 15002.98  | 29475.63  | 26684.97  | 15328.04  | 31353.54  | 19029.46  | 37695.33  | 17215.78  |
| 37879.21  | 28685.57  | 12987.81  | 29104.39  | 30552.45  | 16105.74  | 31866.52  | 19841.59  | 38493.71  | 16944.8   |
| 36942.64  | 34127.62  | 11699.41  | 31167.43  | 27833     | 14262.27  | 32482.06  | 18578.08  | 37621.89  | 16678.47  |

|           |           |           |           |           |           |           |           |           |           |
|-----------|-----------|-----------|-----------|-----------|-----------|-----------|-----------|-----------|-----------|
| LN280.984 |
| 22405.73  | 20751.44  | 42251.54  | 21184.33  | 27417.07  | 31023.9   | 40542.76  | 36927.75  | 18775.19  | 32316.62  |
| 22530.39  | 23053.22  | 39885.98  | 19505.42  | 25481.88  | 32939.19  | 43198.01  | 38835.61  | 17339.69  | 32999.05  |
| 23481.7   | 22435.85  | 43081.9   | 18816.87  | 26348.83  | 29087.62  | 42973.78  | 38594.45  | 17925.79  | 35513.59  |
| 25028.95  | 22154.04  | 41133.61  | 19890.34  | 28180.29  | 31702.81  | 43097.91  | 34662.35  | 17249.58  | 35063.22  |
| 23620.58  | 23495.04  | 41833.23  | 18790.84  | 27418.88  | 29732.8   | 40141.13  | 42228.46  | 17505.31  | 33427.96  |

|           |           |           |           |           |           |           |           |           |           |           |
|-----------|-----------|-----------|-----------|-----------|-----------|-----------|-----------|-----------|-----------|-----------|
| LN280.984 | LN280.985 | LN280.985 | LN280.984 |
| 21903.68  | 26238.04  | 21749.19  | 37194.65  | 25489.69  | 35971.83  | 34306.88  | 20375.24  | 23150.79  | 40103.78  |           |
| 21654.92  | 27127.16  | 19299.86  | 34630.85  | 26906.7   | 31400.02  | 34347.79  | 19968.44  | 21375.32  | 40406.59  |           |
| 21938.24  | 26814.25  | 20093.24  | 34674.04  | 26699.27  | 34844.97  | 32200.49  | 21065.19  | 22697.88  | 40105.67  |           |
| 22506.63  | 28406.31  | 20878.76  | 36081.7   | 25106.94  | 33413.21  | 36218.91  | 19819.47  | 21037.8   | 41219.71  |           |
| 21464.47  | 25204.85  | 21760.03  | 34039.64  | 25719.51  | 37317.51  | 35399.32  | 21438.18  | 17872.26  | 44131.7   |           |



|           |           |           |           |           |           |           |           |           |           |
|-----------|-----------|-----------|-----------|-----------|-----------|-----------|-----------|-----------|-----------|
| LN280.984 | LN281.248 | LN281.248 | LN281.248 |
| 16383.97  | 46001.19  | 34940.74  | 36772.49  | 23196.66  | 28568.6   | 39188.41  | 45215.08  | 20885.67  | 16388.94  |
| 13655.15  | 46851.64  | 32790.28  | 36073.79  | 23326.01  | 27980.56  | 36597.58  | 50209.46  | 18332.31  | 14144.59  |
| 15039.44  | 43566.99  | 31843.1   | 33570.95  | 21053.14  | 27947.4   | 37376.58  | 58554.16  | 26181.51  | 18352.32  |
| 16428.12  | 48763.12  | 32576.82  | 38035.86  | 21270.83  | 26720.16  | 37726.24  | 56690.16  | 29311.92  | 24048.62  |
| 13495.39  | 47007.34  | 31457.25  | 35736.37  | 21711.41  | 30373.57  | 37523.66  | 57125.19  | 31477.27  | 24386.17  |

|           |           |           |           |           |           |           |           |           |           |
|-----------|-----------|-----------|-----------|-----------|-----------|-----------|-----------|-----------|-----------|
| LN281.248 | LN281.248 | LN281.248 | LN281.249 | LN281.248 | LN281.249 | LN281.248 | LN281.248 | LN281.248 | LN281.248 |
| 27675.2   | 40918.45  | 30441.43  | 20280.87  | 31348.14  | 18106.95  | 27503.93  | 25349.11  | 31519.6   | 27572.71  |
| 28738.97  | 40887.45  | 32845.82  | 18275.53  | 27988.45  | 18104.34  | 29010.67  | 25168.64  | 29862.31  | 27884.19  |
| 34530.45  | 47241.99  | 37384.97  | 20244.51  | 38349.65  | 24315.72  | 34018.96  | 31650.26  | 38235.09  | 30787.68  |
| 38470.53  | 53832.65  | 41703.8   | 25556.69  | 41471.69  | 27620.64  | 38893.98  | 34922.51  | 44100.81  | 34544.07  |
| 40408.8   | 59527.95  | 46886.86  | 26131.27  | 42752.87  | 30715.66  | 42481.45  | 37978.67  | 47042.08  | 37285.91  |

|           |           |           |           |           |           |           |           |           |           |
|-----------|-----------|-----------|-----------|-----------|-----------|-----------|-----------|-----------|-----------|
| LN281.248 | LN281.249 | LN281.248 | LN281.248 | LN281.248 | LN281.249 | LN281.248 | LN281.248 | LN281.249 | LN281.249 |
| 36353.76  | 31201.68  | 15664.64  | 31741.1   | 23103.4   | 23444.26  | 28099.92  | 30746.59  | 22959.87  | 25367.44  |
| 34175.1   | 32492.79  | 15163.15  | 28000.47  | 23792.01  | 24355.41  | 26165.48  | 33252.5   | 22482.62  | 25343.8   |
| 40474.22  | 37492.72  | 19542.32  | 30745.68  | 28520.18  | 27343.7   | 31925.43  | 38012.55  | 24667.72  | 28315.63  |
| 44271.3   | 40383.83  | 25011.79  | 35280.22  | 31925.58  | 32069.41  | 37825.57  | 44122.51  | 30228.42  | 31738.27  |
| 48229.25  | 44700.21  | 28664     | 40679.12  | 32561.62  | 32932.09  | 37787.46  | 46345.33  | 31057.63  | 33859     |

|           |           |           |           |           |           |           |           |           |           |
|-----------|-----------|-----------|-----------|-----------|-----------|-----------|-----------|-----------|-----------|
| LN281.249 | LN281.248 | LN281.248 | LN281.248 | LN281.248 | LN281.249 | LN281.248 | LN281.248 | LN281.248 | LN281.249 |
| 24821.86  | 35690.05  | 34011.38  | 43034.26  | 33987.76  | 28062.63  | 31720.38  | 27977.44  | 25055.65  | 26700.05  |
| 22673.78  | 33464.7   | 31273.98  | 38901.86  | 34076.05  | 28473.06  | 30436.01  | 26358.51  | 28755.04  | 27958.8   |
| 27813.64  | 42566.31  | 36672.4   | 47028.27  | 38780.58  | 32484.21  | 35235.79  | 31608.9   | 34981.03  | 33209.9   |
| 32460.37  | 49856.05  | 43806.66  | 55176.25  | 47821.38  | 35221.88  | 41782.45  | 34591.73  | 37236.98  | 38359.34  |
| 34051.22  | 51319.78  | 48415.17  | 60945.19  | 46838.37  | 40487.42  | 43970.84  | 38549.67  | 42250.3   | 42013.85  |

|           |           |           |           |           |           |           |           |           |           |
|-----------|-----------|-----------|-----------|-----------|-----------|-----------|-----------|-----------|-----------|
| LN281.249 | LN281.248 | LN281.248 | LN281.249 | LN281.249 | LN281.248 | LN281.248 | LN281.248 | LN281.248 | LN281.248 |
| 31877.01  | 43772.15  | 28038.83  | 14736.59  | 24079.42  | 27102.39  | 27139.66  | 38478.28  | 29624.76  | 34410.02  |
| 33327.25  | 37450.81  | 27470.14  | 14184.02  | 24850.85  | 26693.5   | 25512.96  | 38342.73  | 26368.87  | 34944.62  |
| 33758.26  | 47722.5   | 35341.3   | 15726.78  | 29416.76  | 35241.38  | 30048.29  | 47478.84  | 35073.95  | 39820.48  |
| 40350.23  | 55112.96  | 39524.55  | 22773.24  | 34526.28  | 38338.9   | 33173.13  | 51220.61  | 39129.7   | 47199.69  |
| 41163.06  | 58918.11  | 41292.8   | 23749.35  | 37818.68  | 38463.05  | 36187     | 56065.24  | 42241.96  | 51446.69  |

|           |           |           |           |           |           |           |           |           |           |
|-----------|-----------|-----------|-----------|-----------|-----------|-----------|-----------|-----------|-----------|
| LN281.248 | LN281.249 | LN281.248 | LN281.248 | LN281.249 | LN283.264 | LN283.264 | LN283.264 | LN283.263 | LN283.264 |
| 44098.5   | 23748.02  | 33931.07  | 39652.61  | 33479.81  | 691858.1  | 80089.81  | 43292.16  | 101221.8  | 261442.9  |
| 45151.19  | 22488.59  | 35124.05  | 40821.08  | 31596.78  | 633683.3  | 84946.54  | 42958.36  | 143833.6  | 239943.2  |
| 51489.7   | 28038.19  | 38070.03  | 48419.28  | 35691.11  | 764543.3  | 98894.63  | 58009.1   | 133086.7  | 191287.9  |
| 60437.56  | 30957.09  | 45981.43  | 51722.05  | 39686.92  | 645431.7  | 101267.5  | 60656.99  | 141734.2  | 206733.8  |
| 61945.12  | 34728.91  | 48525.52  | 51633.21  | 42986.97  | 756550.9  | 118625.5  | 66725.87  | 146212.2  | 209071.9  |

|           |           |           |           |           |           |           |           |           |           |
|-----------|-----------|-----------|-----------|-----------|-----------|-----------|-----------|-----------|-----------|
| LN283.264 |
| 113934.8  | 170431.7  | 87791.19  | 109348    | 152368.4  | 99112.44  | 157466    | 138223.1  | 113665    | 81392.86  |
| 121358.2  | 136585.2  | 146710.1  | 90144.5   | 152736.2  | 117831.3  | 157633.6  | 119120.2  | 141118.1  | 100478.4  |
| 110863.9  | 136713.5  | 102110.5  | 133413.2  | 150112.8  | 117018.8  | 118504.2  | 91541.16  | 149679    | 107455.8  |
| 129658.1  | 161432.5  | 115086.5  | 125116.6  | 146370.3  | 128938.1  | 152871.4  | 125899.7  | 122053.5  | 115678.4  |
| 136066.3  | 193283    | 118707.7  | 120273.6  | 159230.6  | 129523.8  | 166773.8  | 119289.8  | 122995.3  | 133232.2  |

|           |           |           |           |           |           |           |           |           |           |
|-----------|-----------|-----------|-----------|-----------|-----------|-----------|-----------|-----------|-----------|
| LN283.264 |
| 50096.24  | 107120.2  | 92165.66  | 112733.9  | 76220.11  | 169779.9  | 134724.4  | 68228.94  | 127831.4  | 52719.27  |
| 61377.1   | 120996.7  | 105077.5  | 142111.8  | 71609.58  | 136875.4  | 114096.6  | 75503.79  | 131675.8  | 50484.65  |
| 67882.97  | 105280.6  | 94648.05  | 168413.4  | 101359.7  | 163036.4  | 121779.7  | 79820.03  | 120760.8  | 55143.95  |
| 75570.03  | 122516.7  | 93643     | 151163.9  | 95045.17  | 167989    | 117845.5  | 83219.81  | 146390.6  | 61403.98  |
| 76050.19  | 126683.2  | 103828.2  | 157669.7  | 111662.7  | 196549    | 135318.3  | 93119.77  | 179002.6  | 62978.69  |



|           |           |           |           |           |           |           |           |           |           |
|-----------|-----------|-----------|-----------|-----------|-----------|-----------|-----------|-----------|-----------|
| LN283.264 |
| 142014.6  | 119352.4  | 67219.83  | 99767.09  | 96640.74  | 76694.3   | 62033.94  | 92187.17  | 96653.93  | 88816.45  |
| 112781.8  | 101395    | 59936.02  | 108208.2  | 95559.49  | 93503.55  | 54456.07  | 165293.1  | 107309.4  | 114671.4  |
| 120563.6  | 133470.5  | 71605.92  | 115975.3  | 122804.9  | 90452.87  | 64888.31  | 118924.1  | 123359.5  | 107000.3  |
| 120135.4  | 116662.5  | 84484.81  | 134533    | 139196    | 105855.8  | 68412.7   | 124658.7  | 136060.5  | 113576.8  |
| 154041.5  | 116390.7  | 87208.89  | 133366.4  | 146884.2  | 159172.4  | 69820.47  | 138155.8  | 138762.7  | 135618.6  |

|           |           |           |           |           |           |           |           |           |           |
|-----------|-----------|-----------|-----------|-----------|-----------|-----------|-----------|-----------|-----------|
| LN283.264 |
| 80672.69  | 106311.2  | 105533.6  | 81251.75  | 126639    | 96465.86  | 51693.58  | 110535.4  | 100147.5  | 98708.33  |
| 99102.37  | 98792.52  | 116406.6  | 73945.79  | 105456.7  | 108227.2  | 61547.02  | 106303.9  | 117006.2  | 104860.8  |
| 100337.1  | 133733    | 139090.7  | 89969.67  | 121418.4  | 100434.1  | 67533.82  | 127148.2  | 142281.4  | 117200.6  |
| 121329.4  | 134541.1  | 163765.9  | 100685    | 142141.2  | 124690.3  | 81838.15  | 132933.1  | 138041.5  | 115207.1  |
| 140337.9  | 171873.1  | 179712.3  | 115290    | 170494.9  | 120859.5  | 88923.24  | 134278    | 169878.3  | 152612.7  |

|           |           |           |           |           |           |           |           |           |           |
|-----------|-----------|-----------|-----------|-----------|-----------|-----------|-----------|-----------|-----------|
| LN283.264 |
| 73123.79  | 108881    | 130876.1  | 112159.6  | 48817.84  | 93468.14  | 118524.5  | 87495.53  | 101683.4  | 171137.2  |
| 57637.9   | 106200.9  | 143431.2  | 92458.25  | 54845.97  | 97435.52  | 159445.6  | 101400.6  | 83026.15  | 160163.9  |
| 55784.99  | 123789.8  | 197825.5  | 121252.2  | 59651.34  | 107594.9  | 137717.8  | 97018.91  | 130260.6  | 187168.2  |
| 68319.1   | 121434    | 165648.7  | 103960.9  | 71655.25  | 105904    | 159928.4  | 119123.1  | 116277    | 188481.8  |
| 74692.64  | 144767    | 161410.6  | 117070.1  | 73178.97  | 115438.1  | 155993.4  | 134204.2  | 116033.9  | 161242    |

|           |           |           |           |           |           |           |           |           |           |
|-----------|-----------|-----------|-----------|-----------|-----------|-----------|-----------|-----------|-----------|
| LN283.264 |
| 107727.8  | 112184.5  | 79954.67  | 78800.71  | 85904.39  | 89581.37  | 100153.1  | 113651.3  | 105877.1  | 108740.2  |
| 94967.89  | 94524.89  | 97996.82  | 72497.49  | 96161.16  | 79765.09  | 84894.32  | 135597.7  | 105334    | 105971.7  |
| 117592.1  | 116738.5  | 94092.43  | 85054.54  | 119302    | 88282.59  | 95511.57  | 102461.7  | 111723.9  | 113695.5  |
| 119765.4  | 130024.6  | 104736    | 92831.18  | 122374.6  | 103520.9  | 109874    | 126638.8  | 121536.4  | 122462.9  |
| 132007.6  | 129142.7  | 145388.7  | 97941.36  | 127925.6  | 111794.1  | 112349.4  | 129643.5  | 130153.9  | 140536    |

|           |           |           |           |           |           |           |           |           |           |
|-----------|-----------|-----------|-----------|-----------|-----------|-----------|-----------|-----------|-----------|
| LN283.264 | LN283.263 |
| 83637.76  | 52448.25  | 109996.4  | 71263.59  | 220127.6  | 126776.3  | 155062.7  | 90269.48  | 54648.53  | 135842.8  |
| 91268.15  | 42573.27  | 113516.4  | 74937.55  | 152985.3  | 108288.4  | 176258.9  | 93517.67  | 48235.7   | 132536.5  |
| 93107.82  | 57685.31  | 100953    | 78569.42  | 178970.5  | 113310.5  | 156969.5  | 103030.7  | 62525.59  | 138467.3  |
| 104225.4  | 68901.34  | 104660    | 90411.11  | 198504.4  | 124733.7  | 166376.3  | 112488.8  | 65131.26  | 152344    |
| 108670.2  | 71429.45  | 124684.6  | 89521.38  | 189165    | 166945.1  | 172534.3  | 126176.5  | 70006.38  | 176055.5  |

|           |           |           |           |           |           |           |           |           |           |
|-----------|-----------|-----------|-----------|-----------|-----------|-----------|-----------|-----------|-----------|
| LN283.264 | LN284.267 |
| 70408.87  | 19818.8   | 16595.87  | 14988.61  | 16755.81  | 24595.49  | 21069.34  | 18013.06  | 19410.76  | 19426.18  |
| 68293.77  | 24361.86  | 15412.83  | 11918.59  | 16603     | 24997.02  | 21240.63  | 21045.49  | 19588.34  | 17674.71  |
| 71038.77  | 25053.93  | 20056.26  | 17381.81  | 17267.58  | 29173.57  | 26688.84  | 20641.29  | 22121.43  | 19553.52  |
| 76972.29  | 26086.26  | 22061.98  | 19565.65  | 22375.37  | 29832.09  | 24366.84  | 23200.01  | 21391.69  | 22843.43  |
| 94310.43  | 29795.11  | 23604.54  | 19881.29  | 21857.29  | 33721.3   | 27880.9   | 24442.75  | 23441.93  | 23894.17  |

|           |           |           |           |           |           |           |           |           |           |
|-----------|-----------|-----------|-----------|-----------|-----------|-----------|-----------|-----------|-----------|
| LN284.267 |
| 16112.14  | 22297.39  | 14554.9   | 13800.75  | 38415.01  | 16548.39  | 13479.79  | 16576.9   | 16502.93  | 126433.7  |
| 14599.63  | 19149.15  | 15483.08  | 12659.77  | 39049.54  | 15470.93  | 12646.34  | 17570.25  | 18584.4   | 124353    |
| 16475.2   | 21664.47  | 16646.64  | 14309.69  | 41268.67  | 17810.75  | 13923.77  | 19220.81  | 20600.92  | 135601.1  |
| 16725.49  | 25853.99  | 18818.96  | 15574.93  | 41011.72  | 19805.1   | 17042.37  | 20762.38  | 23038.91  | 130461.2  |
| 19117.7   | 24016.77  | 19460.1   | 16448.74  | 45307.27  | 22316.84  | 16060.13  | 22560.97  | 25178.16  | 121368    |

|           |           |           |           |           |           |           |           |           |           |
|-----------|-----------|-----------|-----------|-----------|-----------|-----------|-----------|-----------|-----------|
| LN284.267 | LN284.267 | LN284.267 | LN284.268 | LN284.267 | LN284.267 | LN284.267 | LN284.267 | LN284.267 | LN284.267 |
| 16778.14  | 15110.31  | 15015.25  | 12972.27  | 20998.67  | 17437.95  | 16865.91  | 19535.86  | 21354.4   | 16803.16  |
| 11996.62  | 12980.49  | 14388.39  | 16026.27  | 17983.89  | 12596.06  | 17885.11  | 16670.28  | 21696.66  | 14375.13  |
| 15378.52  | 17145.7   | 15819.76  | 14951.86  | 19106.41  | 17953.3   | 20709.57  | 20883.26  | 23053.15  | 17021.03  |
| 15412.62  | 18899.55  | 19135.58  | 18258     | 23324.98  | 19135.98  | 23840.09  | 25442.01  | 25128.2   | 20585.78  |
| 20316.97  | 20570.67  | 18540.3   | 19101.13  | 20716.1   | 21366.69  | 21476.48  | 26173.58  | 26980.41  | 20117     |



|           |           |           |           |           |           |           |           |           |           |
|-----------|-----------|-----------|-----------|-----------|-----------|-----------|-----------|-----------|-----------|
| LN284.267 | LN284.268 | LN284.267 | LN284.268 | LN284.980 | LN284.996 | LN284.996 | LN284.996 | LN284.996 | LN285.206 |
| 19037.66  | 36266.93  | 34330.56  | 16346.54  | 36541.89  | 35213.95  | 41040.06  | 37551.31  | 57587.73  | 15314.86  |
| 20732.94  | 34160.48  | 30917.16  | 14978.15  | 39732.44  | 37123.47  | 40095.46  | 41262.81  | 51585.01  | 14527.42  |
| 23012.46  | 37891.57  | 36426.9   | 20698.46  | 38387.7   | 31044.49  | 35363.78  | 38670.43  | 51010.79  | 13158.55  |
| 24698.86  | 38991.66  | 37141.87  | 21970.96  | 40038.8   | 34133.86  | 39289.1   | 33526.2   | 51883.74  | 15024.19  |
| 22486.78  | 38452.14  | 38511.67  | 21328.87  | 37280.08  | 36881.07  | 40231.84  | 39283     | 48973.46  | 14504.11  |

|           |           |           |           |           |           |           |           |           |           |
|-----------|-----------|-----------|-----------|-----------|-----------|-----------|-----------|-----------|-----------|
| LN285.206 | LN285.206 | LN285.206 | LN285.206 | LN285.206 | LN285.908 | LN285.908 | LN285.908 | LN285.909 | LN286.992 |
| 12029.01  | 22024.27  | 17992.5   | 23537.27  | 13404.63  | 88527.05  | 19869.08  | 20511.56  | 17335.81  | 56568.99  |
| 11522.5   | 20852.38  | 16799.48  | 25318.26  | 15277.82  | 48703.58  | 20583.04  | 21222.5   | 16896.74  | 60522.34  |
| 13174.7   | 19256.13  | 17374.58  | 22457.76  | 11894.9   | 54246.56  | 18923.08  | 22747.58  | 17611.92  | 56954.66  |
| 14098.11  | 20965.43  | 16476.73  | 23570.56  | 11737.06  | 46425.01  | 18844.7   | 18694.1   | 17355.03  | 62656.67  |
| 13239.91  | 20599.49  | 19540.42  | 23220.52  | 12268.11  | 71107.71  | 21662.34  | 22839.9   | 18162.6   | 58995.91  |

|           |           |           |           |           |           |           |           |           |           |           |
|-----------|-----------|-----------|-----------|-----------|-----------|-----------|-----------|-----------|-----------|-----------|
| LN286.992 | LN287.15_ | LN287.150 | LN287.150 | LN287.150 | LN287.150 | LN287.150 | LN287.150 | LN288.859 | LN288.934 | LN288.952 |
| 30401.15  | 21371.22  | 21360.32  | 17535.35  | 23958.37  | 28376.46  | 14969.08  | 23524.38  | 30136.76  | 34200.38  |           |
| 32650.23  | 21108.26  | 20897.3   | 15509.37  | 23139.41  | 29743.57  | 14277.54  | 17943.05  | 26097.17  | 33309.33  |           |
| 34285.07  | 18804.08  | 22016.13  | 16957.46  | 22552.36  | 28894.47  | 13072.28  | 19890.59  | 30206.77  | 36522.69  |           |
| 34758.05  | 19591.5   | 20749.82  | 19735.55  | 25471.22  | 29930.16  | 12878.18  | 22161.72  | 29674.34  | 31698.52  |           |
| 34049.33  | 16270.1   | 22201.38  | 16836.65  | 24624.72  | 29281.02  | 16253.8   | 24099.03  | 34071.46  | 28997.55  |           |

|           |           |           |           |           |           |           |           |           |           |
|-----------|-----------|-----------|-----------|-----------|-----------|-----------|-----------|-----------|-----------|
| LN288.952 |
| 34063.56  | 41239.63  | 40384.91  | 26705.51  | 20272.21  | 51948.57  | 38535.77  | 32414.49  | 30033.1   | 45011.74  |
| 31218.54  | 45921.29  | 39797.7   | 22965.11  | 19978.54  | 52742.49  | 35725.24  | 34896.25  | 32234.52  | 46972.96  |
| 32736.04  | 42451.19  | 39937.62  | 24765.98  | 20106.78  | 51255.37  | 39285.82  | 32838.15  | 32260.82  | 46335.64  |
| 34457.69  | 44280.62  | 40179.56  | 23714.56  | 16776.03  | 56765.76  | 38104.4   | 32288.15  | 35080.49  | 46799.95  |
| 33596.3   | 38373.36  | 39409.25  | 25221.04  | 17503.53  | 52856.22  | 38091.28  | 33775.58  | 33190.15  | 42253.17  |

|           |           |           |           |           |           |           |           |           |           |
|-----------|-----------|-----------|-----------|-----------|-----------|-----------|-----------|-----------|-----------|
| LN288.952 |
| 34814.66  | 27410.85  | 26732.7   | 46786.57  | 44942.55  | 37905     | 47032.16  | 42369.64  | 35017.68  | 36358     |
| 33978.21  | 27773.34  | 27698.68  | 44049.44  | 42666.51  | 35298.19  | 43239.91  | 40038.89  | 38118.84  | 37282.3   |
| 34161.06  | 30977.05  | 29544.8   | 45301.67  | 44193.49  | 36655.42  | 44114.19  | 41331.64  | 37593.5   | 35933.55  |
| 34436.54  | 31706.63  | 27635.96  | 44175.73  | 45268.42  | 37521.17  | 43317.85  | 37789.99  | 35296.27  | 36920.7   |
| 33126.22  | 28964.51  | 26776.4   | 45917.55  | 47231.69  | 36620.97  | 43352.45  | 41925.58  | 32906.49  | 39475.03  |

|           |           |           |           |           |           |           |           |           |           |
|-----------|-----------|-----------|-----------|-----------|-----------|-----------|-----------|-----------|-----------|
| LN288.952 |
| 32715.66  | 33871.43  | 44630.62  | 44585.21  | 41659.32  | 50326.55  | 32439.78  | 43862.67  | 42241.01  | 30865.9   |
| 35589.78  | 29447.71  | 47113.02  | 46518.35  | 44301.88  | 52447.15  | 34513.66  | 43249.91  | 43685.72  | 30010.3   |
| 32848.4   | 27450.08  | 47455.19  | 51590.34  | 43479.97  | 50933.42  | 35202.97  | 40914.46  | 40730.97  | 30445.08  |
| 38822.47  | 30884.71  | 47020.53  | 48088.8   | 43046.48  | 51429.88  | 34546.14  | 44824.81  | 46568.69  | 32085.72  |
| 35597.22  | 29889.89  | 46547.27  | 43753.29  | 41299.23  | 50267.22  | 36657.72  | 40331.63  | 36027.19  | 31182.41  |

|           |           |           |           |           |           |           |           |           |           |
|-----------|-----------|-----------|-----------|-----------|-----------|-----------|-----------|-----------|-----------|
| LN288.952 |
| 57126.94  | 26728.54  | 31881.05  | 32329.51  | 35307.6   | 49761.94  | 54411.33  | 39440.31  | 23383.64  | 32654.46  |
| 60639.2   | 27758.37  | 31210.8   | 30415.02  | 35603.43  | 51725.02  | 55389.9   | 42481.08  | 27383.99  | 34237.01  |
| 58409.52  | 24594.65  | 30317.1   | 30447.61  | 31835.02  | 47486.96  | 57179.75  | 42337.31  | 24485     | 32208.49  |
| 61006.05  | 24548.43  | 34056.77  | 29904.48  | 34659.5   | 49167.49  | 53336.76  | 41956.65  | 24133.05  | 33045.5   |
| 57429.64  | 26994.76  | 33297.72  | 29681.79  | 34427.86  | 46927.23  | 55278.95  | 39864.02  | 23152.63  | 32522.94  |

|           |           |           |           |           |           |           |           |           |           |
|-----------|-----------|-----------|-----------|-----------|-----------|-----------|-----------|-----------|-----------|
| LN288.952 | LN289.129 |
| 25755.54  | 23032.65  | 28158.66  | 42970.77  | 51791.09  | 30925.37  | 43203.74  | 44319.94  | 24077.47  | 24969.35  |
| 22934.42  | 23495.11  | 24525.96  | 43299.16  | 47282.29  | 31724.2   | 42389.48  | 46484.85  | 23951.18  | 25261.77  |
| 25252.77  | 24365.31  | 24712.63  | 43804.81  | 50449.17  | 29684.12  | 42969.06  | 39229.38  | 25485.19  | 25720.43  |
| 24781.94  | 24109.99  | 23312.95  | 43777.88  | 55270.44  | 34481.2   | 43501.88  | 48861.09  | 22439.25  | 26051.27  |
| 24589.93  | 22329.84  | 23820.19  | 44950.16  | 49267.93  | 31257.87  | 42106.12  | 45689.59  | 25683.02  | 22143.64  |



|           |           |           |           |           |           |           |           |           |           |
|-----------|-----------|-----------|-----------|-----------|-----------|-----------|-----------|-----------|-----------|
| LN289.129 |
| 25991.95  | 27921.2   | 32219.5   | 30415.89  | 27069.24  | 28138.55  | 37682.07  | 19387.64  | 40213.82  | 29487.11  |
| 27655.52  | 31622.07  | 31913.69  | 31297.91  | 25366.52  | 26788.53  | 37469.75  | 23070.95  | 38883.9   | 29739.38  |
| 22691.11  | 31462.41  | 34054.09  | 32879.08  | 28665.26  | 27215.17  | 37283.01  | 21538.06  | 41333.28  | 29191.74  |
| 22458.71  | 29663.28  | 31536.86  | 34699.89  | 27731.53  | 27205.87  | 36860.85  | 18587.73  | 42008.27  | 26740.85  |
| 25381.73  | 28285.81  | 28973.08  | 33780.5   | 27874.16  | 24486.96  | 38185.38  | 21344.4   | 38336.63  | 26263.21  |

|           |           |           |           |           |           |           |           |           |           |
|-----------|-----------|-----------|-----------|-----------|-----------|-----------|-----------|-----------|-----------|
| LN289.129 |
| 25380.11  | 21847.75  | 37476.85  | 25614.96  | 18334.87  | 25229.98  | 29180.87  | 52780     | 26371.99  | 24845.56  |
| 21905.62  | 24845.72  | 35161.48  | 29166.31  | 17950.88  | 23675.36  | 30054.95  | 51878.61  | 27448.24  | 28186.92  |
| 23185.68  | 19178.66  | 33927.94  | 26743.95  | 20270.55  | 22287.8   | 26079.51  | 48986.42  | 29612.61  | 23067.13  |
| 23983.77  | 23664.17  | 34214.97  | 26448.48  | 19196.74  | 22730.01  | 31755.19  | 49349.2   | 27149.93  | 27597.43  |
| 23111.01  | 22644.04  | 34756.37  | 28846.87  | 19366.65  | 22875.88  | 29543.76  | 51236.95  | 27086.38  | 27292.84  |

|           |           |           |           |           |           |           |           |           |           |
|-----------|-----------|-----------|-----------|-----------|-----------|-----------|-----------|-----------|-----------|
| LN289.129 |
| 41621.36  | 33021.94  | 21589.24  | 31926.09  | 28466.63  | 20851.77  | 31528.01  | 21339     | 20520.49  | 13054.15  |
| 39669.98  | 34185.32  | 24316.27  | 31690.8   | 26220.7   | 20104.68  | 30105.29  | 22384.85  | 19893.5   | 13212.92  |
| 37010.4   | 33098.12  | 20808.35  | 32972.39  | 31730.97  | 19305.14  | 28842.17  | 23219.48  | 22428.31  | 14781.13  |
| 36957.13  | 38382.21  | 23458.74  | 31086.52  | 29901.33  | 22548.96  | 34142.07  | 20786.73  | 21642.86  | 15607.6   |
| 39187.01  | 32312.78  | 23623.18  | 30741.72  | 25798.39  | 18920.69  | 30865.55  | 21478.17  | 22344.45  | 13267.98  |

|           |           |           |           |           |           |           |           |           |           |
|-----------|-----------|-----------|-----------|-----------|-----------|-----------|-----------|-----------|-----------|
| LN289.129 |
| 24607.77  | 15396.25  | 31198.93  | 37948.76  | 34763.48  | 21079.43  | 33801.69  | 28951.02  | 50209.78  | 25347.4   |
| 23034     | 15215.25  | 29792.16  | 36534.98  | 32637.57  | 25517.1   | 32947.81  | 29582.49  | 50066.78  | 26480.12  |
| 22786.71  | 15360.02  | 30590.56  | 40129.95  | 34205.37  | 24192.14  | 34818.76  | 28114.1   | 46768.46  | 25783.09  |
| 26838.61  | 18706.44  | 29152.69  | 38435.28  | 33685.72  | 24000.06  | 35477.13  | 27612.41  | 49013.35  | 26369.74  |
| 26492.86  | 17679.3   | 30583.38  | 37745.74  | 34904.32  | 27168.68  | 34262.7   | 27860.03  | 50052.88  | 27405.08  |

|           |           |           |           |           |           |           |           |           |           |
|-----------|-----------|-----------|-----------|-----------|-----------|-----------|-----------|-----------|-----------|
| LN289.129 |
| 26703     | 30733.05  | 36106.93  | 24032.11  | 23873.55  | 41868.15  | 26276.95  | 23227.88  | 38457.39  | 13670.92  |
| 27639.5   | 32186.04  | 33682.33  | 25467.58  | 29623.23  | 39792.8   | 25059     | 24590.11  | 41774.94  | 14377.62  |
| 29556.02  | 33059.41  | 31764.84  | 23426.51  | 26432.54  | 43677.37  | 25199.26  | 22569.68  | 42154.83  | 16230.41  |
| 30840.84  | 34643.77  | 34875.89  | 28215.03  | 27863.32  | 41872.93  | 26085.11  | 23979.89  | 37283.42  | 15968.02  |
| 31526.56  | 30610.83  | 33563.63  | 25740.52  | 28084.17  | 40879.62  | 23322.15  | 19383.72  | 38332.79  | 16579.8   |

|           |           |           |           |           |           |           |           |           |           |
|-----------|-----------|-----------|-----------|-----------|-----------|-----------|-----------|-----------|-----------|
| LN289.129 |
| 40997.39  | 16223.79  | 23140.66  | 25090.55  | 31821.8   | 14179.77  | 29176.07  | 33760.31  | 26772.33  | 22078.13  |
| 40295.92  | 16707.77  | 24213.25  | 24069.07  | 30936.59  | 15178.44  | 30098.03  | 36523.79  | 27694.75  | 23165.63  |
| 41390.81  | 14079.39  | 27588.94  | 24949.01  | 31455.36  | 15453.29  | 29471.19  | 33488.15  | 29634.35  | 20625.93  |
| 41693.71  | 15643.72  | 25031.08  | 24126.79  | 34561.96  | 12657.19  | 28733.63  | 35588.51  | 27220.7   | 21482.58  |
| 39015.57  | 13504.27  | 23379.79  | 21302.86  | 29315.03  | 13680.46  | 28739.91  | 37325.74  | 27928.38  | 21876.7   |

|           |           |           |           |           |           |           |           |           |           |
|-----------|-----------|-----------|-----------|-----------|-----------|-----------|-----------|-----------|-----------|
| LN289.129 |
| 18822.97  | 21842.79  | 17401.39  | 26331.71  | 48837.03  | 36789.47  | 28529.8   | 25407.32  | 24383.41  | 20574.38  |
| 21446.35  | 23112.34  | 19388.26  | 26701.2   | 45183.57  | 39706.15  | 30805.65  | 25460.58  | 25084.33  | 22872.86  |
| 21287.69  | 25876.11  | 16878.94  | 25505.13  | 45771.6   | 34495.13  | 30267.38  | 27996.68  | 21307.94  | 22203.37  |
| 22671.47  | 22671.25  | 18326.13  | 25991.1   | 46076.77  | 38584.52  | 26905.53  | 24880.15  | 22917.05  | 22591.22  |
| 22306.74  | 24152.44  | 17260.17  | 28344.58  | 42519.43  | 36043.94  | 30570.03  | 28210.34  | 22980.67  | 18915.24  |

|           |           |           |           |           |           |           |           |           |           |
|-----------|-----------|-----------|-----------|-----------|-----------|-----------|-----------|-----------|-----------|
| LN289.129 |
| 20844.45  | 44573.52  | 20129.04  | 27733.81  | 45056.94  | 37731.38  | 21692.35  | 30127.77  | 32112.21  | 20561.4   |
| 19903.93  | 44838.85  | 20856.1   | 30656.07  | 40787.54  | 32267.14  | 20987.94  | 28135.59  | 31082     | 18957.71  |
| 23036.3   | 48260.58  | 21252.81  | 30290.08  | 40933.8   | 36772.64  | 19142.11  | 24627.43  | 32434.12  | 21159.24  |
| 19855.73  | 50180.36  | 19583.24  | 29253.21  | 45907.33  | 36734.45  | 22756.48  | 28153.1   | 35940.81  | 22333.06  |
| 21814.62  | 45812.93  | 18930.26  | 30926.74  | 43947.26  | 39401.67  | 22125.33  | 24687.26  | 29125.4   | 22121.72  |



|           |           |           |           |           |           |           |           |           |           |
|-----------|-----------|-----------|-----------|-----------|-----------|-----------|-----------|-----------|-----------|
| LN289.129 | LN289.129 | LN290.853 | LN291.006 | LN291.007 | LN291.007 | LN291.007 | LN291.007 | LN291.007 | LN291.007 |
| 31534.37  | 13552.38  | 116564.4  | 68113.67  | 56620.86  | 53614.69  | 61800.28  | 69045.85  | 49607.72  | 71956.51  |
| 33875.87  | 12556.9   | 91144.15  | 94364.36  | 58785.43  | 45803.14  | 57519.73  | 81749.62  | 71232.61  | 55306.23  |
| 29849.53  | 12859     | 92493.73  | 69822.13  | 53516.76  | 57053.83  | 61557.77  | 70505.05  | 65087.33  | 58878.58  |
| 33039.3   | 12568.98  | 110912    | 95242.54  | 52331.32  | 51093.5   | 63452.58  | 73060.13  | 57605.14  | 74532.3   |
| 30016.27  | 12664.08  | 159030.7  | 94601.45  | 42396.07  | 35508.68  | 59207.72  | 51163.73  | 64700.5   | 101284.7  |

|           |           |           |           |           |           |           |           |           |           |
|-----------|-----------|-----------|-----------|-----------|-----------|-----------|-----------|-----------|-----------|
| LN291.007 |
| 19114.19  | 36693.84  | 85633.35  | 70907.68  | 73161.01  | 62317.28  | 40657.73  | 71257.3   | 48668.53  | 28143.46  |
| 17151.61  | 51089.42  | 144784.9  | 76596.39  | 108871    | 87410.53  | 50096.45  | 63104.94  | 51757.49  | 31708.97  |
| 25284.85  | 50243.35  | 106818.8  | 54847.92  | 78282.81  | 88158.73  | 46629.99  | 83739.56  | 49071.01  | 33602.73  |
| 14876.34  | 45879.66  | 111900.7  | 70126.7   | 68526.67  | 72919.3   | 43760.73  | 64631.16  | 50050.21  | 31145.24  |
| 16982.23  | 49699.36  | 91565.66  | 103696.5  | 74962.22  | 50496.72  | 55061.36  | 91664.46  | 37997.99  | 32485.25  |

|           |           |           |           |           |           |           |           |           |           |
|-----------|-----------|-----------|-----------|-----------|-----------|-----------|-----------|-----------|-----------|
| LN291.007 |
| 112253    | 75002.93  | 96054.27  | 68434.73  | 53980.92  | 84906.42  | 65965.29  | 77408.68  | 93518.43  | 118978.5  |
| 74209.21  | 44870.43  | 91004.82  | 70580.69  | 48636.43  | 79488.47  | 28944.61  | 60833.11  | 70597.07  | 99770.82  |
| 120745.9  | 48553.38  | 65708.8   | 46065.66  | 71446.41  | 88348.39  | 46058.35  | 55350.46  | 102042.7  | 73935.83  |
| 75397.83  | 48930.97  | 60233.38  | 55205.23  | 55648.62  | 78828.68  | 33629     | 56894.43  | 79461.16  | 81673.83  |
| 73629.1   | 54500.03  | 84563.69  | 36359.85  | 56089.11  | 104997    | 43649.03  | 61934.18  | 74006.49  | 111171.3  |

|           |           |           |           |           |           |           |           |           |           |
|-----------|-----------|-----------|-----------|-----------|-----------|-----------|-----------|-----------|-----------|
| LN291.007 |
| 26425.97  | 64684.45  | 55884.89  | 94249.52  | 112534.9  | 76304.2   | 111650.2  | 104367.2  | 83408.59  | 53951.5   |
| 31587.77  | 83678.64  | 51057.68  | 91888.59  | 97486.04  | 81098.27  | 77670.49  | 75338.4   | 58154.03  | 80977.35  |
| 33139.18  | 103652.6  | 42169.43  | 89633.21  | 81384.09  | 55289.45  | 90480.2   | 73144.44  | 83612.89  | 56016.59  |
| 31533.3   | 82988.88  | 54211.72  | 74349.44  | 81887.69  | 70288.95  | 79953.84  | 89138.52  | 70709.45  | 60074.45  |
| 31500.15  | 90982.91  | 63691.89  | 61956.4   | 59836.13  | 68554.63  | 99188.04  | 75621.24  | 85885.05  | 58866.95  |

|           |           |           |           |           |           |           |           |           |           |
|-----------|-----------|-----------|-----------|-----------|-----------|-----------|-----------|-----------|-----------|
| LN291.007 |
| 76757.1   | 58640.21  | 43124.12  | 111404.9  | 112305.1  | 134083.8  | 21506.31  | 65466.55  | 62583.09  | 45149.94  |
| 87802.48  | 60844.34  | 69106.72  | 99905.11  | 98754.03  | 102689.9  | 34513.43  | 56528.29  | 54051.37  | 52542.25  |
| 121338.9  | 49189.37  | 82167.06  | 155328.5  | 83425.91  | 101958.7  | 20305.78  | 45709.95  | 62714.33  | 41339.86  |
| 80317.65  | 55935.05  | 53258.7   | 95895.06  | 114719    | 113130.7  | 23094.49  | 41466.8   | 31427.54  | 40839.57  |
| 88201.11  | 69919.51  | 55324.46  | 96754.96  | 126149.9  | 171600.8  | 27918.08  | 62299.99  | 45822.04  | 35294.48  |

|           |           |           |           |           |           |           |           |           |           |
|-----------|-----------|-----------|-----------|-----------|-----------|-----------|-----------|-----------|-----------|
| LN291.007 |
| 44609.4   | 71093.88  | 54469.98  | 117973.3  | 44918.42  | 90943.6   | 78338.32  | 62898.46  | 53932.65  | 76412.33  |
| 45576.68  | 99650.83  | 57617.68  | 124914.4  | 63196.58  | 114136.9  | 81838.65  | 40547.81  | 71058.18  | 106279    |
| 43913.91  | 106331.8  | 40650.97  | 113736.2  | 45548     | 87574.95  | 63835.54  | 64758.69  | 46514.4   | 102964.9  |
| 44154.3   | 71060.92  | 40532.01  | 101952.9  | 44439.84  | 84326.43  | 82094.03  | 55174.63  | 54600.35  | 106619.8  |
| 36919.64  | 72244.95  | 56991.39  | 131449.5  | 44558.33  | 77314.14  | 80379.64  | 46937.66  | 65703.2   | 159417.8  |

|           |           |           |           |           |           |           |           |           |           |
|-----------|-----------|-----------|-----------|-----------|-----------|-----------|-----------|-----------|-----------|
| LN291.007 |
| 64304.3   | 23324.54  | 68289.43  | 70958.41  | 31117.24  | 41046.21  | 49093.82  | 25591.28  | 39393.04  | 31905.02  |
| 80490.81  | 18673.73  | 58712.51  | 69154.3   | 32993.61  | 42551.58  | 56749.89  | 22856.28  | 49182.39  | 29484.39  |
| 73952.8   | 30471.71  | 71846.6   | 104662.1  | 43240.52  | 47360.34  | 47168.56  | 23724.4   | 33364.56  | 32102.96  |
| 58762.34  | 22319.74  | 68498.31  | 73417.59  | 36257.3   | 40164.6   | 45124.09  | 23530.35  | 40614.92  | 31065.03  |
| 57834.91  | 25915.36  | 67232.04  | 78459.99  | 37171.46  | 44076.83  | 45910.91  | 25304.77  | 46401.98  | 29593.68  |

|           |           |           |           |           |           |           |           |           |           |
|-----------|-----------|-----------|-----------|-----------|-----------|-----------|-----------|-----------|-----------|
| LN291.007 |
| 37885.59  | 59066.88  | 61278.71  | 39781.06  | 41916.91  | 21678.73  | 42621.93  | 59873.65  | 53646.45  | 16427.48  |
| 47905.95  | 56005.67  | 52977.78  | 51475.71  | 43425     | 33257.24  | 45589.21  | 46720.11  | 75735.97  | 20349     |
| 40792.57  | 56889.01  | 60165.91  | 53020.01  | 73665.13  | 29912.13  | 56228.84  | 45357.16  | 81937.47  | 27660.73  |
| 39957.93  | 61580.13  | 53429.37  | 48438.04  | 50378.52  | 22172.76  | 47390.69  | 66096.59  | 54771.49  | 23577.31  |
| 39931.94  | 62458.14  | 54927.32  | 44349.04  | 38412.63  | 27227.78  | 58988.51  | 83028.57  | 68532.6   | 19198.31  |



|           |           |           |           |           |           |           |           |           |           |
|-----------|-----------|-----------|-----------|-----------|-----------|-----------|-----------|-----------|-----------|
| LN291.007 | LN291.007 | LN291.007 | LN291.008 | LN291.007 | LN291.008 | LN291.008 | LN291.008 | LN291.008 | LN292.868 |
| 32393.79  | 21072.63  | 38039.94  | 15294.25  | 15604.48  | 23600.15  | 14464.17  | 79931.14  | 33190.08  | 19596.14  |
| 18520.17  | 33741.35  | 38086.04  | 15790     | 17454.04  | 22236.19  | 16497.17  | 76861     | 35362.45  | 14169.94  |
| 24792.55  | 37651.69  | 40008.52  | 17052.06  | 18159.89  | 19758.25  | 17212.08  | 79764.92  | 33036.5   | 16752.64  |
| 21277.59  | 28413.95  | 41228.43  | 14504.37  | 15882.24  | 22207.94  | 15761.32  | 81976.7   | 34555.5   | 21560.42  |
| 27051.04  | 28105.23  | 41403.25  | 17290.23  | 17762.7   | 21202.18  | 18021.34  | 80842.97  | 32203.4   | 24524.5   |

|           |           |           |           |           |           |           |           |           |           |
|-----------|-----------|-----------|-----------|-----------|-----------|-----------|-----------|-----------|-----------|
| LN292.986 | LN292.986 | LN292.986 | LN292.986 | LN292.985 | LN292.986 | LN292.986 | LN293.884 | LN294.830 | LN294.953 |
| 62378.32  | 52843.38  | 41882.23  | 38654.79  | 53967.56  | 43616.83  | 44270.7   | 12656.08  | 21435.23  | 70005.55  |
| 61345.6   | 50288.55  | 47890.38  | 43080.79  | 52873.85  | 38615.98  | 39768.59  | 9252.056  | 17862.13  | 73189.97  |
| 65558.18  | 47135.16  | 43865.68  | 39543.92  | 57130.9   | 42743.89  | 38757.47  | 6690.652  | 16043.86  | 72898.49  |
| 64276.56  | 52592.42  | 41118.55  | 40411.63  | 55938.35  | 43056.82  | 41070.16  | 10622.1   | 22329.14  | 70690.94  |
| 64059.53  | 47861.09  | 44525.91  | 38581.01  | 57374.34  | 42217.39  | 43344.43  | 14449.72  | 26917.63  | 66725.57  |

|           |           |           |           |           |           |           |           |           |           |
|-----------|-----------|-----------|-----------|-----------|-----------|-----------|-----------|-----------|-----------|
| LN294.982 | LN294.981 | LN294.981 | LN294.981 | LN294.982 | LN294.982 | LN294.981 | LN294.982 | LN294.981 | LN294.982 |
| 62584.35  | 47599.96  | 50457.43  | 61001.33  | 71816.33  | 65531.74  | 56214.63  | 68385.14  | 46831.5   | 45304.98  |
| 83282.26  | 50390.42  | 69265.79  | 53439.51  | 47216.85  | 38688.66  | 34919.08  | 33684.8   | 34320.4   | 22644.21  |
| 61158.59  | 49914.19  | 42834.6   | 61418.83  | 69830.73  | 59852.09  | 55589.99  | 71906.65  | 48558.72  | 54104.18  |
| 62230.47  | 52647.21  | 43333.48  | 58767.99  | 75633.01  | 64073.93  | 56454.35  | 72634.18  | 42823.85  | 50454.64  |
| 61384.56  | 50474.98  | 44440.12  | 64794.81  | 72062.54  | 64725.06  | 49976.3   | 69341.87  | 41943.51  | 52636.29  |

|           |           |           |           |           |           |           |           |           |           |
|-----------|-----------|-----------|-----------|-----------|-----------|-----------|-----------|-----------|-----------|
| LN294.982 |
| 66181.25  | 54466.04  | 27776.84  | 52240.94  | 57072.37  | 38833.48  | 20906.53  | 56828.81  | 38630.76  | 71525.59  |
| 54545.94  | 30256.81  | 13645.4   | 37405.31  | 47196.1   | 28325.6   | 12317.18  | 33621.08  | 28001.53  | 33842.97  |
| 67744.09  | 55865.11  | 28284.3   | 57913.96  | 56542.2   | 41807.98  | 24017.74  | 60572.87  | 38745.47  | 79907.79  |
| 61058.85  | 61028.85  | 29418.85  | 64579.87  | 55332.56  | 39624.28  | 25889.1   | 56915.58  | 41538.6   | 78010.81  |
| 67898.49  | 55422.62  | 27371.64  | 57135.71  | 52388.23  | 41611.32  | 23941.53  | 61561.25  | 40570.38  | 74071.52  |

|           |           |           |           |           |           |           |           |           |           |
|-----------|-----------|-----------|-----------|-----------|-----------|-----------|-----------|-----------|-----------|
| LN294.981 | LN294.982 | LN294.982 | LN294.982 | LN294.982 | LN294.981 | LN294.982 | LN294.982 | LN294.982 | LN294.982 |
| 76705.3   | 20311.44  | 27651.79  | 56379.44  | 85725.81  | 57461.52  | 48407.54  | 45504.26  | 45325.34  | 32404.49  |
| 67612.69  | 15370.95  | 18690.54  | 25885.52  | 53141.49  | 41001.91  | 21434.01  | 28744.87  | 16839.32  | 17192.21  |
| 78203.55  | 22276.05  | 31004.38  | 51629.21  | 91586.31  | 59491.08  | 61500.64  | 46571.7   | 42497.34  | 30545.74  |
| 83911.83  | 19916.4   | 31471.58  | 52166.63  | 91559.59  | 60113.95  | 58733.44  | 52987.43  | 47584.58  | 31065.67  |
| 82442.47  | 20798.9   | 28630.37  | 51023.7   | 88115.07  | 62838.02  | 64212.98  | 48929.09  | 41010.78  | 29264.89  |

|           |           |           |           |           |           |           |           |           |           |
|-----------|-----------|-----------|-----------|-----------|-----------|-----------|-----------|-----------|-----------|
| LN294.982 | LN294.982 | LN294.982 | LN294.982 | LN294.982 | LN294.982 | LN294.981 | LN294.982 | LN294.982 | LN294.981 |
| 63636.63  | 80259.29  | 54285.82  | 17095.09  | 33658.14  | 65354.23  | 58114.82  | 52755.47  | 27458.65  | 54391.42  |
| 36968.04  | 46509.89  | 32361.33  | 14863.2   | 15278.39  | 31946.06  | 67314.32  | 31746.37  | 14798.14  | 36446.38  |
| 68602.43  | 80909.11  | 60681.09  | 14706.26  | 36551.59  | 62809.42  | 54073.23  | 45030.79  | 23354.5   | 53411.04  |
| 68952.79  | 86088.22  | 53324.12  | 16172.76  | 32407.34  | 65670.25  | 56167.84  | 53589.48  | 21179.14  | 56275.25  |
| 63055.29  | 86533.21  | 57660.11  | 14810.55  | 35650.07  | 63466.25  | 54785.84  | 44026.3   | 22658.07  | 58751.19  |

|           |           |           |           |           |           |           |           |           |           |
|-----------|-----------|-----------|-----------|-----------|-----------|-----------|-----------|-----------|-----------|
| LN294.981 | LN294.981 | LN294.981 | LN294.981 | LN294.982 | LN294.982 | LN294.982 | LN294.982 | LN294.982 | LN294.982 |
| 62048.9   | 62332.11  | 44430.04  | 72750.88  | 69932.75  | 61081.63  | 57762.93  | 60927.28  | 65253.59  | 58763.25  |
| 74940.93  | 45445.77  | 52084.91  | 44503.06  | 38899.41  | 29541.06  | 26471.76  | 30778.23  | 35337.18  | 35250.2   |
| 66866.5   | 64243.7   | 53703.57  | 79112.44  | 71284.9   | 57049.24  | 56712.85  | 59858.89  | 69877.47  | 63070.96  |
| 64884.93  | 61085.04  | 47003.6   | 75410.81  | 72952.71  | 57306.7   | 52357.05  | 66297.41  | 65248.81  | 62738.99  |
| 66290.2   | 69104.96  | 48770.51  | 72657.52  | 66107.39  | 57028.26  | 55110.76  | 69459.94  | 66392.53  | 68268.51  |

|           |           |           |           |           |           |           |           |           |           |
|-----------|-----------|-----------|-----------|-----------|-----------|-----------|-----------|-----------|-----------|
| LN294.982 |
| 59597.19  | 24356.77  | 54189.46  | 32155.07  | 37615.83  | 51476.57  | 58536.67  | 43858.01  | 66050.28  | 50221.46  |
| 32685.36  | 10085.25  | 38123.91  | 19038.25  | 21342.02  | 26541.44  | 27002.94  | 23948.85  | 41060.31  | 52052.63  |
| 62275.4   | 25402.32  | 57935.44  | 31346.47  | 37973.14  | 51842.2   | 64899.71  | 46326.21  | 73067.66  | 53591     |
| 68905.84  | 21472.22  | 59621.29  | 29255.42  | 37606.57  | 53163.46  | 69698.58  | 45164.19  | 65707.78  | 57926.62  |
| 63600.28  | 24360.37  | 53873.76  | 30651.64  | 38618.89  | 50876.4   | 64589.48  | 46239.26  | 69094.95  | 50218.03  |



| LN294.982 | LN294.981 | LN294.982 | LN294.982 | LN294.982 | LN294.982 | LN296.890 | LN296.890 | LN296.890 | LN296.890 |
|-----------|-----------|-----------|-----------|-----------|-----------|-----------|-----------|-----------|-----------|
| 69138.67  | 36957.6   | 70943.51  | 82255.05  | 49977.85  | 35035.07  | 38858.93  | 39341.54  | 32628.09  | 34798.41  |
| 69044.27  | 37453.4   | 45202.11  | 61694.61  | 30664.31  | 20642.14  | 33167.86  | 35279.11  | 37127.88  | 35223.26  |
| 72382.44  | 37617.91  | 71318.92  | 82843.61  | 53812.92  | 34181.78  | 36133.21  | 38047.35  | 34223.19  | 35637.1   |
| 71549.11  | 39891.52  | 68004.41  | 72925     | 52360.07  | 33812.88  | 39805.06  | 38775     | 34938.32  | 38338.2   |
| 71671.46  | 38170.51  | 70154.57  | 82376.85  | 52669.7   | 33025.96  | 36646.7   | 41805.17  | 34004.18  | 34949.03  |

|           |           |           |           |           |           |           |           |           |           |
|-----------|-----------|-----------|-----------|-----------|-----------|-----------|-----------|-----------|-----------|
| LN296.890 |
| 39345.35  | 33372.15  | 32800.46  | 37668.52  | 24991.44  | 31710     | 18479.79  | 15851.67  | 37912.94  | 26658.94  |
| 37312.02  | 36986.98  | 33700.43  | 35739.94  | 26008.4   | 31976.86  | 18923.78  | 16565.42  | 32810.4   | 26306.1   |
| 40143.41  | 30726.26  | 30368.66  | 39631.5   | 25083.5   | 30925.02  | 16978.38  | 18547.82  | 38628.03  | 25679.31  |
| 36714.89  | 36370.51  | 32051.19  | 39832.92  | 26806.44  | 32627.64  | 21111.04  | 14762.02  | 37850.5   | 24739.08  |
| 39284.65  | 33823.69  | 29936.43  | 39089.03  | 25810.21  | 30356.46  | 18268.46  | 17483.45  | 33867.15  | 29620.86  |

|           |           |           |           |           |           |           |           |           |           |
|-----------|-----------|-----------|-----------|-----------|-----------|-----------|-----------|-----------|-----------|
| LN296.890 |
| 32794.35  | 33637.99  | 42245.31  | 23086.73  | 13806.76  | 33971.46  | 24560.18  | 19538.33  | 27136.35  | 23746.1   |
| 32088.88  | 35361.94  | 44217.64  | 24167.05  | 16027.56  | 37064.57  | 26440.53  | 19983.3   | 24817.83  | 24141.35  |
| 34217.37  | 30249.82  | 42936.6   | 26825.62  | 14583     | 31631.14  | 27694.03  | 18158.62  | 26234.28  | 24359.93  |
| 34233.48  | 33477.14  | 41577.33  | 22989.01  | 14447.51  | 36044.76  | 25946.04  | 16802.33  | 25107     | 22637.56  |
| 31899.9   | 32486.59  | 42070.3   | 22286.54  | 13473.71  | 38926.32  | 28889.14  | 19363.8   | 24339.82  | 25461.26  |

|           |           |           |           |           |           |           |           |           |           |
|-----------|-----------|-----------|-----------|-----------|-----------|-----------|-----------|-----------|-----------|
| LN296.890 |
| 31186.6   | 27558.02  | 24593.62  | 40730.94  | 46100.74  | 41324.08  | 28595.94  | 16767.08  | 26547.41  | 13872.49  |
| 28086.36  | 30839.11  | 29065.54  | 39348.82  | 44552.5   | 37955.21  | 25427.34  | 18757.17  | 34247.15  | 18664.13  |
| 28700.02  | 29983.16  | 23349.92  | 37991.45  | 42547.46  | 34717.76  | 27564.51  | 17749.17  | 32822.79  | 18375.91  |
| 27120.85  | 26301.06  | 26532.72  | 37898.41  | 41628.45  | 36488.66  | 29265.84  | 19316.72  | 34954.8   | 18568.34  |
| 30241.36  | 29474.49  | 28272.01  | 39019.37  | 41289.21  | 40812.92  | 26643.22  | 20399.89  | 33287.87  | 17300.27  |

|           |           |           |           |           |           |           |           |           |           |
|-----------|-----------|-----------|-----------|-----------|-----------|-----------|-----------|-----------|-----------|
| LN296.890 |
| 49174.34  | 23506.49  | 38976.64  | 39626.66  | 28814.28  | 24698.85  | 29763.09  | 31393.32  | 24044.61  | 27101.25  |
| 49165.51  | 25199.91  | 39071.26  | 42204.65  | 27001.21  | 26007.11  | 31602.28  | 31929.7   | 24156.61  | 27110.7   |
| 50266.01  | 26486.43  | 36872.69  | 40188.35  | 30283.63  | 28031.49  | 29772.36  | 30946.99  | 22685.13  | 28376.51  |
| 48920.41  | 26451.79  | 40539.39  | 45193.23  | 24849.88  | 25692.66  | 32128.88  | 31088.55  | 24499.75  | 26669.12  |
| 50727.29  | 26242.94  | 36958.46  | 42467.52  | 25986.72  | 21887.53  | 32603.51  | 27733.67  | 23261.63  | 25332.69  |

|           |           |           |           |           |           |           |           |           |           |
|-----------|-----------|-----------|-----------|-----------|-----------|-----------|-----------|-----------|-----------|
| LN296.890 | LN296.890 | LN296.890 | LN296.979 | LN296.996 | LN296.997 | LN296.997 | LN296.997 | LN296.997 | LN296.997 |
| 25243.97  | 28663.82  | 31256.3   | 55291.24  | 36085.85  | 48263.19  | 45817.53  | 44920.19  | 37072.16  | 36834.61  |
| 25097.38  | 27260.38  | 30815.85  | 52417.94  | 45803.88  | 38383.09  | 44107.72  | 30835.16  | 49083.74  | 26784.83  |
| 23330.56  | 25318.82  | 33483.37  | 55276     | 41257.22  | 59326.85  | 50457.64  | 50968.85  | 37884.98  | 39560.2   |
| 24507.3   | 25951.59  | 34871.58  | 57115.68  | 49360.43  | 53225.93  | 42829.87  | 45126.55  | 43289.65  | 40204.75  |
| 24627.77  | 26185.53  | 36272.92  | 54713.69  | 45050.77  | 48993.95  | 50000.55  | 39499.6   | 42156.6   | 35453.1   |

|           |           |           |           |           |           |           |           |           |           |
|-----------|-----------|-----------|-----------|-----------|-----------|-----------|-----------|-----------|-----------|
| LN296.997 |
| 31819.75  | 49288.31  | 35454.48  | 47369.57  | 42094.43  | 41521.66  | 59126.86  | 50283.84  | 31019.84  | 54586.46  |
| 26387.66  | 52787.99  | 43781.63  | 38391.58  | 78096.92  | 53679.6   | 47901.89  | 48673.85  | 33199.31  | 67350.65  |
| 43604.83  | 46619.47  | 35959.43  | 44555.03  | 57108.94  | 42118.3   | 50960.23  | 61203.48  | 38714.52  | 75116.62  |
| 35339.16  | 41225.07  | 26969.34  | 39010.56  | 49781.06  | 41477.94  | 46601.41  | 44535.68  | 27996.95  | 56652.35  |
| 31549.83  | 43245.57  | 31380.47  | 67425.14  | 59133.67  | 35256.78  | 76317.94  | 41737.4   | 31140.15  | 66800.35  |

|           |           |           |           |           |           |           |           |           |           |
|-----------|-----------|-----------|-----------|-----------|-----------|-----------|-----------|-----------|-----------|
| LN296.997 |
| 49049.77  | 23141.5   | 40225.54  | 67633.15  | 27177.1   | 39917.22  | 40684.86  | 52079.39  | 40089.61  | 39829.05  |
| 39803.35  | 23301.9   | 32089.33  | 74505.08  | 21056.83  | 52406.15  | 52203.56  | 40261.28  | 65886.39  | 54959.14  |
| 41664.75  | 39941.47  | 38264.97  | 64534.72  | 25630.47  | 46547.97  | 38809.14  | 51910.71  | 32277.03  | 40309.7   |
| 42100.6   | 21348.04  | 45505.75  | 61649.28  | 28538.19  | 33568.05  | 44591.97  | 39689.66  | 44035.41  | 41292.91  |
| 37896.03  | 34910.05  | 37073.65  | 58983.06  | 21305.02  | 38698.07  | 56487.63  | 57445.89  | 44625.12  | 44838.17  |



|           |           |           |           |           |           |           |           |           |           |
|-----------|-----------|-----------|-----------|-----------|-----------|-----------|-----------|-----------|-----------|
| LN296.997 | LN296.996 |
| 55535.87  | 23664.1   | 42083.21  | 65554.76  | 51727.21  | 33687.6   | 40280.46  | 37803.2   | 25667.08  | 63950.25  |
| 37426.94  | 31978.91  | 27326.6   | 74949.57  | 52252.74  | 34964.08  | 33034.4   | 39171.55  | 32129.01  | 57812.39  |
| 42845.03  | 26467.12  | 30513.21  | 42669.86  | 65447.61  | 39687.08  | 40086.25  | 29877.08  | 32577.27  | 66812.54  |
| 47665.79  | 29744.79  | 26956.65  | 51594.26  | 53311.71  | 46264.64  | 39350.65  | 31864.19  | 32128.54  | 52447.74  |
| 50524.3   | 35400.76  | 25127.6   | 85985.2   | 55258.3   | 48757.31  | 33559.13  | 39385.2   | 30735.26  | 54892.49  |

|           |           |           |           |           |           |           |           |           |           |
|-----------|-----------|-----------|-----------|-----------|-----------|-----------|-----------|-----------|-----------|
| LN296.997 |
| 29961.34  | 43215.12  | 65667.87  | 52473.66  | 26673.62  | 41061.57  | 27460.03  | 51032.85  | 102152.6  | 37748.82  |
| 34826.73  | 55366.4   | 51688.31  | 45126.8   | 25875.1   | 39461.2   | 35885.62  | 59811.94  | 61487.29  | 28586.8   |
| 39854.05  | 41552.26  | 60807.52  | 73681.89  | 32225.81  | 37892.73  | 32551.92  | 50009.23  | 62239.1   | 37336.43  |
| 30250.57  | 46352.87  | 63448.99  | 49204.03  | 29541.26  | 39749.78  | 34495.13  | 47601.01  | 57825.48  | 36569.73  |
| 41511.85  | 36933.56  | 87905.33  | 53593.61  | 39218.68  | 32479.45  | 33081.53  | 33711.56  | 68894.54  | 31599.48  |

|           |           |           |           |           |           |           |           |           |           |
|-----------|-----------|-----------|-----------|-----------|-----------|-----------|-----------|-----------|-----------|
| LN296.997 |
| 46055.26  | 28255.14  | 40106.48  | 44212.86  | 29944.76  | 39543.4   | 29775.9   | 49643.79  | 40094.19  | 34967.57  |
| 44311.52  | 47559.48  | 46133.38  | 51119.64  | 35730.43  | 29029.8   | 23775.13  | 31948.24  | 27178.3   | 30023.42  |
| 46776.03  | 22997.14  | 53601.27  | 42919.73  | 24586.6   | 45357.38  | 26270.22  | 31181.39  | 28798.93  | 29856.57  |
| 47297.24  | 30244.43  | 50814.22  | 42992.15  | 28174.78  | 28280.87  | 24648.81  | 33438.87  | 27163.01  | 20735.17  |
| 53474.48  | 32467.97  | 56114.23  | 46302.89  | 28388.07  | 33347.41  | 43842.39  | 35635.47  | 29914.81  | 32346.86  |

|           |           |           |           |           |           |           |           |           |           |
|-----------|-----------|-----------|-----------|-----------|-----------|-----------|-----------|-----------|-----------|
| LN296.997 |
| 11465.15  | 33840.63  | 15039.25  | 33642.6   | 25801.88  | 19348.85  | 52224.75  | 19309.47  | 17639.97  | 22686.88  |
| 10874.31  | 19195.2   | 17463.05  | 33074.95  | 25965.2   | 16500.21  | 26779.44  | 14891.75  | 20654.24  | 17843.59  |
| 11702.83  | 23013.87  | 22097.82  | 29236.68  | 26275.98  | 23450     | 38869.18  | 14488.81  | 13293.84  | 15974.82  |
| 10493.85  | 28776.91  | 15973.04  | 28002.57  | 23600.4   | 20540.51  | 35944.79  | 13771.55  | 14897.43  | 16644.49  |
| 11249.26  | 32481.14  | 19534.59  | 28008.67  | 17411.54  | 18724.63  | 52703.32  | 21274.42  | 13680.59  | 20393.92  |

|           |           |           |           |           |           |           |           |           |           |
|-----------|-----------|-----------|-----------|-----------|-----------|-----------|-----------|-----------|-----------|
| LN296.997 |
| 46082.18  | 12919.03  | 26781.32  | 29385.37  | 27615.86  | 33830.63  | 39193.28  | 24174.26  | 16812.04  | 14592.99  |
| 39106.59  | 16735.98  | 47899.76  | 35776.4   | 42145.06  | 34542.6   | 41840.51  | 26191.39  | 17043.63  | 17219.66  |
| 32609.76  | 13214.42  | 44957     | 26078.54  | 23788.95  | 42099.86  | 37764.89  | 26808.78  | 22315.35  | 20094.98  |
| 35881.76  | 14747.95  | 32668.09  | 24972.08  | 29540.44  | 36051.11  | 36933.04  | 28180.48  | 17589.42  | 16362.54  |
| 36290.98  | 15030.52  | 30622.99  | 27316.96  | 32531.5   | 41533.7   | 36663.59  | 29794.73  | 18218.4   | 16748.25  |

|           |           |           |           |           |           |           |           |           |           |           |
|-----------|-----------|-----------|-----------|-----------|-----------|-----------|-----------|-----------|-----------|-----------|
| LN296.997 | LN296.998 | LN296.998 | LN296.998 | LN296.998 |
| 18047.23  | 30177.83  | 28435.57  | 25606.98  | 19433.86  | 32943.77  | 17969.28  | 17563.79  | 34620.8   | 45391.35  |           |
| 13930.9   | 25761.7   | 28834.74  | 33691.98  | 16242.94  | 31750.96  | 19791.72  | 15119.2   | 34577.97  | 42819.02  |           |
| 16293.4   | 22704.38  | 27767.88  | 39429.41  | 21720.8   | 34413.43  | 20380.27  | 18553.2   | 31248.93  | 38857.44  |           |
| 16915.83  | 28641.46  | 26190.35  | 27641.02  | 17485.34  | 33991.83  | 19823.16  | 18512.17  | 30328.59  | 43003.49  |           |
| 20494.12  | 31148.62  | 28935.22  | 35811.4   | 15803.95  | 32269.49  | 19593.93  | 16443.44  | 33150.76  | 41057.36  |           |

|           |           |           |           |           |           |           |           |           |           |
|-----------|-----------|-----------|-----------|-----------|-----------|-----------|-----------|-----------|-----------|
| LN296.998 | LN297.047 | LN297.047 | LN297.047 | LN297.242 | LN297.243 | LN297.243 | LN297.243 | LN297.243 | LN297.243 |
| 20464.95  | 22270.78  | 26974.29  | 21426.22  | 36187.82  | 16104.96  | 42973.81  | 56028.35  | 67534.6   | 59783.28  |
| 19836.68  | 21375.64  | 26025.14  | 24181.34  | 36425.21  | 25408.22  | 41183.39  | 55548.11  | 69122.01  | 87328.9   |
| 21919.31  | 22472.41  | 23792.03  | 19402.66  | 38378.28  | 20886.1   | 66007.85  | 65858.98  | 77275.79  | 68803.85  |
| 17445.82  | 17316.49  | 26689.31  | 21107.72  | 38388.52  | 22629.47  | 47024.82  | 68012.14  | 68517.25  | 83301.49  |
| 20821.53  | 22169.77  | 26716.87  | 19373.49  | 42802.17  | 24925.12  | 71473.14  | 68850.7   | 72527.97  | 82612.5   |

|           |           |           |           |           |           |           |           |           |           |
|-----------|-----------|-----------|-----------|-----------|-----------|-----------|-----------|-----------|-----------|
| LN297.243 |
| 44749.94  | 54667.79  | 49702.93  | 59674.9   | 35814.59  | 57548.78  | 54615.68  | 48145.26  | 65930.88  | 42402.07  |
| 52997.38  | 55174.41  | 64417.25  | 41012.27  | 41090.66  | 49635.08  | 65035.59  | 56671.45  | 79162.03  | 32019.75  |
| 58715.91  | 64609.2   | 55038.24  | 54483.71  | 40092.84  | 65986.48  | 56583.29  | 74984.79  | 78399.73  | 35132.08  |
| 56821.74  | 60687.38  | 49348.07  | 54317.85  | 44611.44  | 62338.88  | 53726.2   | 61614.55  | 78274.03  | 37650.45  |
| 69658.39  | 62374.49  | 72387.12  | 56792.25  | 45589.22  | 62747.89  | 57880.02  | 68571.01  | 77796.91  | 39692.7   |



|           |           |           |           |           |           |           |           |           |           |
|-----------|-----------|-----------|-----------|-----------|-----------|-----------|-----------|-----------|-----------|
| LN297.243 |
| 55259.35  | 64756.53  | 53477.81  | 53188.24  | 55758.13  | 38204.17  | 60431.81  | 65829.89  | 50313.51  | 55805.29  |
| 64099.56  | 51022.22  | 43366.77  | 51847.9   | 45334.55  | 39681.02  | 51141.27  | 63528.17  | 43467.99  | 55093.58  |
| 58534.29  | 68943.46  | 73557.67  | 81746.69  | 51909.74  | 52366.66  | 53444.63  | 73921.6   | 43453.71  | 55202.77  |
| 60788.57  | 57512.75  | 55760.56  | 66790.64  | 64093.93  | 51274.73  | 56073.62  | 64007.26  | 55380.75  | 61193.4   |
| 65349.34  | 62329.05  | 54238.9   | 74335.01  | 63649.77  | 52293.76  | 67885.5   | 75946.47  | 53198.09  | 63760.61  |

|           |           |           |           |           |           |           |           |           |           |
|-----------|-----------|-----------|-----------|-----------|-----------|-----------|-----------|-----------|-----------|
| LN297.243 |
| 52934.67  | 80819.53  | 59206.66  | 29802.13  | 39533.92  | 69566.92  | 44658.93  | 34927.97  | 55936.75  | 53536.91  |
| 65966.21  | 55961.53  | 54130.83  | 32671.74  | 30332.63  | 53629.2   | 51020.84  | 32296.37  | 63758.84  | 65269.41  |
| 68037.25  | 79562.74  | 61042.08  | 40835.88  | 39566.6   | 64171.91  | 61379.24  | 40050.91  | 69898.22  | 54531.27  |
| 67595.94  | 65785.28  | 72626.69  | 35970.13  | 41771.29  | 82487.02  | 53957.83  | 37094.17  | 65611.24  | 61278.83  |
| 76908.22  | 81652.28  | 61079.88  | 37205.9   | 47713.79  | 90373.38  | 58302.16  | 38315.26  | 59946.17  | 53694.13  |

|           |           |           |           |           |           |           |           |           |           |
|-----------|-----------|-----------|-----------|-----------|-----------|-----------|-----------|-----------|-----------|
| LN297.243 |
| 74850.13  | 66301.23  | 31851.39  | 62139.56  | 43469.64  | 54655.77  | 83770.03  | 57217.18  | 44162.96  | 64012.65  |
| 60353.59  | 61078.76  | 41734.33  | 75138.08  | 49382.77  | 44011.27  | 56135.74  | 64939.68  | 51883.33  | 38423.27  |
| 55912.42  | 54243.12  | 48398.97  | 63249.21  | 69169     | 50959.45  | 52722.94  | 89431.51  | 49577.63  | 51296.43  |
| 59335.24  | 74308.95  | 42642.4   | 67500.16  | 59141.8   | 44174.18  | 62402.79  | 60706.49  | 60138.82  | 47823.65  |
| 73753.16  | 90111.78  | 44615.77  | 82613.29  | 55875.3   | 48063.54  | 68630.35  | 75361.8   | 67461.99  | 65722.73  |

|           |           |           |           |           |           |           |           |           |           |
|-----------|-----------|-----------|-----------|-----------|-----------|-----------|-----------|-----------|-----------|
| LN297.243 |
| 41529.22  | 60102.3   | 64820.12  | 48489.82  | 60117.75  | 54275.5   | 47895.25  | 64807.01  | 32672.56  | 42607.35  |
| 48992.37  | 43704.54  | 42384.33  | 47432.15  | 50878.1   | 59559.9   | 47056.24  | 39614.83  | 34492.94  | 48939.69  |
| 52345.98  | 52431.81  | 53952.75  | 54387.29  | 48014.32  | 49062.64  | 66831.91  | 50375.33  | 49095.04  | 48565.73  |
| 48934.49  | 65628.19  | 52913.6   | 57038.32  | 56032.89  | 51141.27  | 60821.44  | 55408.79  | 42472.38  | 57849.94  |
| 48750.91  | 59894.05  | 46749.83  | 80138.22  | 54274.61  | 69835.62  | 66099.88  | 54904     | 42036.69  | 64718.91  |

|           |           |           |           |           |           |           |           |           |           |
|-----------|-----------|-----------|-----------|-----------|-----------|-----------|-----------|-----------|-----------|
| LN297.243 |
| 54925.45  | 64375.96  | 50535.88  | 60576.54  | 54910.59  | 61649.58  | 65095.87  | 38121.55  | 35666.52  | 49042.69  |
| 56279.79  | 71426.96  | 46382.79  | 52396.56  | 57215.69  | 75576.78  | 61764.24  | 43645.92  | 40838.47  | 45444.31  |
| 56810.14  | 71110.67  | 61126.19  | 66945.41  | 53722.67  | 71023.76  | 61079.72  | 39839.39  | 55513.18  | 56474.02  |
| 72340.17  | 73935.08  | 60383.29  | 66136.89  | 59145     | 73514.55  | 70644.8   | 46807.53  | 50075.52  | 59210.2   |
| 70817.53  | 77463.46  | 67915.08  | 61451.05  | 66963.9   | 64147.17  | 75672.41  | 51070.49  | 47894.08  | 57832.19  |

|           |           |           |           |           |           |           |           |           |           |
|-----------|-----------|-----------|-----------|-----------|-----------|-----------|-----------|-----------|-----------|
| LN297.243 |
| 46477.19  | 76218.85  | 32468.73  | 49617.25  | 63504.93  | 51483.92  | 50553.93  | 66291.54  | 43276.51  | 71046.59  |
| 48405.65  | 46488.37  | 22708.78  | 52328.37  | 50656.21  | 43839.78  | 57614.32  | 61242.22  | 54695.21  | 58410.78  |
| 57089.77  | 61874.38  | 36373.12  | 53410.32  | 72540.99  | 60408.32  | 58359.46  | 54197.59  | 48998.7   | 76213.3   |
| 50621.8   | 62076.01  | 39234.77  | 59644.7   | 67814.98  | 46647.07  | 55317.39  | 57417.59  | 54821.39  | 81379.98  |
| 74486.32  | 59479.38  | 38071     | 57881.18  | 64835.55  | 61114.32  | 57867.51  | 65751.2   | 64870.91  | 81480.79  |

|           |           |           |           |           |           |           |           |           |           |
|-----------|-----------|-----------|-----------|-----------|-----------|-----------|-----------|-----------|-----------|
| LN297.243 |
| 42191.24  | 61917.4   | 50831.1   | 69731.78  | 45088.96  | 45442.05  | 54216     | 52638.04  | 28261.47  | 38081.71  |
| 51021.76  | 40221.22  | 40025.88  | 60528     | 54594.33  | 41273.75  | 48640.23  | 49025.27  | 32501.53  | 62742.8   |
| 54917.21  | 51635.33  | 51498.88  | 59531.13  | 50617.91  | 45844.48  | 52124.88  | 72484.84  | 31911.98  | 50211.81  |
| 52671     | 50184.61  | 54686.24  | 60861.78  | 59401.12  | 45356.34  | 54360.48  | 64770.01  | 36012.58  | 52965.12  |
| 63392.44  | 52589.76  | 51890.01  | 67815.08  | 77335.12  | 47648.88  | 57019.74  | 64722.99  | 34049.97  | 60414.31  |

|           |           |           |           |           |           |           |           |           |           |
|-----------|-----------|-----------|-----------|-----------|-----------|-----------|-----------|-----------|-----------|
| LN297.243 | LN297.243 | LN297.826 | LN298.855 | LN298.994 | LN298.994 | LN298.995 | LN299.919 | LN299.919 | LN299.919 |
| 52135     | 27024.07  | 32859.63  | 20011.36  | 26627.58  | 28193.29  | 29478.5   | 85149.96  | 56789.76  | 82676.32  |
| 39760.3   | 28607.59  | 25658.19  | 14891.22  | 23142.94  | 29934.6   | 30805.92  | 80914.75  | 71072.17  | 76139.34  |
| 52382.66  | 31121.97  | 29190.29  | 17488.92  | 26164.26  | 27146.33  | 31560.5   | 68675.94  | 89310.83  | 59792.17  |
| 47654.76  | 32584.12  | 30030.48  | 15785.41  | 24087.25  | 29419.38  | 27473.09  | 135749.7  | 65461.93  | 73799.84  |
| 56302.57  | 33723.74  | 38631.47  | 14709.03  | 25489.84  | 32371.43  | 28952.65  | 81482.15  | 61439.3   | 95194.99  |



|           |           |           |           |           |           |           |           |           |           |
|-----------|-----------|-----------|-----------|-----------|-----------|-----------|-----------|-----------|-----------|
| LN299.918 | LN299.919 | LN299.918 | LN299.919 |
| 46460.71  | 78227.6   | 97833.02  | 74285.64  | 58741.23  | 51012.59  | 51544.24  | 102447.5  | 47071.26  | 91739.76  |
| 53744.16  | 76910.64  | 66619.1   | 62044.16  | 53222.47  | 52806.95  | 84421.15  | 48517.53  | 41838.84  | 88424.12  |
| 64941.53  | 99472.2   | 63478.94  | 69033.27  | 64659.05  | 65258.95  | 68499.72  | 65011.09  | 50665.14  | 74964.37  |
| 62271.96  | 78095.98  | 48884.74  | 51136.86  | 64230.28  | 54822.21  | 78957.32  | 73029.54  | 38976.36  | 67524.88  |
| 57839.56  | 90914.13  | 61045.75  | 66764.53  | 72393.4   | 84332.91  | 69359.49  | 48454.13  | 44234.13  | 62739.74  |

|           |           |           |           |           |           |           |           |           |           |
|-----------|-----------|-----------|-----------|-----------|-----------|-----------|-----------|-----------|-----------|
| LN299.918 | LN299.919 | LN299.919 | LN299.919 | LN299.919 | LN299.919 | LN299.919 | LN299.918 | LN299.919 | LN299.919 |
| 47391.88  | 79559.34  | 127990.3  | 114650.2  | 59544.74  | 83342.14  | 59778.08  | 61366.27  | 64241.07  | 73551.52  |
| 70083.28  | 66364.76  | 69245.4   | 112722.6  | 87879.91  | 83235.25  | 61206.78  | 53096.65  | 65200.36  | 64753.47  |
| 58560.55  | 54842.76  | 75769.29  | 62128.5   | 78109.84  | 47425.53  | 68613.25  | 55825.6   | 76106.31  | 53665.93  |
| 68681.42  | 51828.82  | 66897.56  | 76589.76  | 58883.18  | 57420.48  | 65870.79  | 72152.71  | 72834.33  | 66456.17  |
| 69241.05  | 63907.26  | 117134.2  | 81077.21  | 100442.8  | 75593.55  | 57263.39  | 51726.8   | 58374.28  | 70075.13  |

|           |           |           |           |           |           |           |           |           |           |
|-----------|-----------|-----------|-----------|-----------|-----------|-----------|-----------|-----------|-----------|
| LN299.918 | LN299.919 | LN299.919 | LN299.919 | LN299.919 | LN299.918 | LN299.919 | LN299.919 | LN299.919 | LN299.919 |
| 90783.77  | 89925.95  | 90976.88  | 57743.82  | 52370.01  | 56806.36  | 87230.85  | 63591.3   | 70340.71  | 69414.11  |
| 76641.35  | 74533.98  | 79771.95  | 49015.42  | 68499.34  | 62603.41  | 69971.92  | 63211.11  | 53942.75  | 97331.44  |
| 91755.78  | 67750.79  | 79615.46  | 77236.91  | 40160.27  | 68232.66  | 56570.21  | 68547.82  | 63323.55  | 102608.3  |
| 59529.65  | 75238.59  | 83480.81  | 60907.67  | 67780.19  | 90386.92  | 61419.63  | 47750.18  | 58771.82  | 70129.07  |
| 63845.51  | 57323.57  | 71460.23  | 51227.39  | 57848.8   | 75679.85  | 75435.65  | 52872.13  | 58158.97  | 119498.1  |

|           |           |           |           |           |           |           |           |           |           |
|-----------|-----------|-----------|-----------|-----------|-----------|-----------|-----------|-----------|-----------|
| LN299.919 | LN299.918 | LN299.919 | LN299.919 | LN299.919 | LN299.918 | LN299.918 | LN299.919 | LN299.919 | LN299.919 |
| 56194.92  | 70738.47  | 59434.93  | 68872.71  | 66481     | 64476.79  | 56518.48  | 60844.41  | 59545.11  | 63358.04  |
| 56699.31  | 51891.35  | 89973.08  | 59706.94  | 69350.68  | 66191.64  | 58266.13  | 79343.69  | 58259.63  | 71751.2   |
| 56702.88  | 76279.53  | 46057.93  | 68215.13  | 49880.18  | 57702.76  | 52665.08  | 54936.1   | 53232     | 53930.3   |
| 63191.98  | 53250.29  | 69661.34  | 51585.67  | 84295.52  | 96324.18  | 68114.97  | 49498.24  | 82432.24  | 76576.29  |
| 61053.17  | 53062.21  | 63824.71  | 56043.98  | 66004.04  | 64914.49  | 50166.06  | 82536.19  | 65889.22  | 60991.56  |

|           |           |           |           |           |           |           |           |           |           |
|-----------|-----------|-----------|-----------|-----------|-----------|-----------|-----------|-----------|-----------|
| LN299.919 | LN299.919 | LN299.919 | LN299.919 | LN299.919 | LN299.919 | LN299.918 | LN299.919 | LN299.918 | LN299.919 |
| 82775.1   | 54826.05  | 84958.91  | 79071.76  | 85134.48  | 70361.47  | 50123     | 61268.95  | 61236.66  | 69495.91  |
| 55380.47  | 63436.48  | 62563.85  | 76636.2   | 57819.28  | 48906.73  | 59672.76  | 58463.17  | 54628.34  | 59472.07  |
| 63208.31  | 72672.52  | 63192.72  | 72592.79  | 64897.28  | 55860.56  | 51371.03  | 52537.61  | 83452.96  | 52300.79  |
| 65598.01  | 59601.37  | 79839.07  | 55843.96  | 62954.15  | 59871.92  | 48360.83  | 66264.48  | 54111.51  | 60844.32  |
| 89655.16  | 66270.28  | 68283.76  | 52317.44  | 59897.77  | 74302.64  | 63246.58  | 84934.21  | 71874.33  | 65273.54  |

|           |           |           |           |           |           |           |           |           |           |
|-----------|-----------|-----------|-----------|-----------|-----------|-----------|-----------|-----------|-----------|
| LN299.919 |
| 64133.3   | 85638.55  | 94923.34  | 61132.18  | 80595.5   | 110389.5  | 81448.96  | 77367.18  | 85056.96  | 40994.25  |
| 73753.08  | 75992.34  | 75505.75  | 45886.83  | 58406.57  | 78384.66  | 95074.99  | 99344.48  | 67169.16  | 51082.98  |
| 47480.63  | 82992.1   | 59303.56  | 61915.52  | 58804.26  | 71013.79  | 73447.03  | 42039.15  | 55999.16  | 73614.46  |
| 49186.71  | 102271.7  | 78496.31  | 43916.38  | 44163.01  | 82030.94  | 71987.18  | 56113.99  | 82430.16  | 54986.34  |
| 82354.12  | 55777.73  | 84233.93  | 107659    | 48419.25  | 95508.54  | 110113.3  | 67916.38  | 72780.18  | 44926.3   |

|           |           |           |           |           |           |           |           |           |           |
|-----------|-----------|-----------|-----------|-----------|-----------|-----------|-----------|-----------|-----------|
| LN299.919 |
| 56954.71  | 73838.36  | 45117.84  | 72057.52  | 60692.28  | 65601.85  | 49915.31  | 80588.3   | 51704.08  | 78840.59  |
| 73815.51  | 69556.3   | 62610.55  | 76219.3   | 70381.13  | 72729.43  | 61455.79  | 70120.29  | 59693.48  | 63543.53  |
| 77196.17  | 89825.92  | 77881.69  | 53271.77  | 51492.17  | 56480.68  | 60520.28  | 48970.99  | 72371.83  | 57081.98  |
| 71788.83  | 67285.38  | 55002.48  | 84539.75  | 57048.97  | 55688.92  | 60578.44  | 55040.82  | 64762.46  | 54732.88  |
| 53493.4   | 98828.83  | 57913.18  | 77664.39  | 56931.24  | 78919.52  | 52121.49  | 61397.6   | 68744.43  | 69387.66  |

|           |           |           |           |           |           |           |           |           |           |
|-----------|-----------|-----------|-----------|-----------|-----------|-----------|-----------|-----------|-----------|
| LN299.919 | LN299.919 | LN299.918 | LN299.919 |
| 64107.55  | 69010.72  | 70890.87  | 80568.66  | 61980.8   | 72128.59  | 99657.34  | 43055.37  | 86477.59  | 56868.55  |
| 72137.83  | 61796.12  | 48249.69  | 61249.78  | 68092.47  | 69259.36  | 66722.61  | 49056.16  | 72273.56  | 59187.83  |
| 78150.57  | 66337.09  | 85151.2   | 61404.43  | 58613.6   | 53483.92  | 57861.65  | 41344.11  | 62247.72  | 56796.98  |
| 79286.35  | 69975.86  | 53022.55  | 92632.36  | 59691.9   | 68146.51  | 58786.37  | 49399.75  | 61103.95  | 61645.55  |
| 76120.54  | 46597.16  | 67112.14  | 69864.24  | 53125.52  | 57457.81  | 52316.17  | 43465.71  | 67379.62  | 71961.22  |



|           |           |           |           |           |           |           |           |           |           |
|-----------|-----------|-----------|-----------|-----------|-----------|-----------|-----------|-----------|-----------|
| LN299.918 | LN299.919 | LN299.919 | LN299.919 | LN300.830 | LN300.902 | LN300.903 | LN300.991 | LN300.991 | LN300.991 |
| 52586.49  | 109730.6  | 93305.11  | 65622.07  | 15651.74  | 56277.41  | 53310.16  | 12384.71  | 77750.94  | 44369.22  |
| 52632.41  | 59146.18  | 95305.98  | 69633.03  | 17587.7   | 56584.15  | 51806.84  | 19099.03  | 88769.35  | 44487.38  |
| 50406.93  | 68600.92  | 61056.27  | 70170.5   | 15107.91  | 52651.13  | 50488.26  | 13454.4   | 90733.01  | 46928.61  |
| 51750.7   | 63974.41  | 39242.4   | 74707.58  | 15564.07  | 54274.22  | 51765.55  | 14674.27  | 61070.12  | 38942.25  |
| 60220.02  | 69069.1   | 64449.5   | 68440.61  | 17288.34  | 56102.94  | 54390.32  | 22388.27  | 42166.62  | 45049.59  |

|           |           |           |           |           |           |           |           |           |           |
|-----------|-----------|-----------|-----------|-----------|-----------|-----------|-----------|-----------|-----------|
| LN300.991 |
| 37312.81  | 32178.92  | 28682.51  | 25015.51  | 64431.82  | 50514.76  | 52608.35  | 58697.98  | 35024.09  | 44624.2   |
| 44901.3   | 29465.41  | 21251.55  | 20094.02  | 71138.19  | 44574.35  | 44337.21  | 63282.89  | 39350.58  | 38708.68  |
| 61307.72  | 19207.88  | 21606.95  | 33297.87  | 105690.4  | 42163.44  | 53614.92  | 57997.04  | 46797.67  | 48765.38  |
| 46848.43  | 20005.94  | 24612.25  | 27864.68  | 72952.31  | 37096.95  | 43546.16  | 58137.95  | 39688.3   | 44224.37  |
| 36984.04  | 18761.81  | 26153.08  | 22048.43  | 92166.08  | 35007.55  | 48050.67  | 53034.55  | 37862.91  | 38162.24  |

|           |           |           |           |           |           |           |           |           |           |
|-----------|-----------|-----------|-----------|-----------|-----------|-----------|-----------|-----------|-----------|
| LN300.991 |
| 65589.71  | 33264.72  | 51283.4   | 38133.79  | 43658.96  | 50901.24  | 69641.94  | 61160.2   | 49368.36  | 49928.93  |
| 55139.64  | 26583.22  | 43380.58  | 61260.47  | 57518.34  | 38658.19  | 65168.86  | 41613.34  | 57887.45  | 39190.8   |
| 54276.27  | 45051.97  | 53093.16  | 76770.34  | 35833.01  | 50718.47  | 63434.53  | 33287.23  | 73636.62  | 29670.35  |
| 53696.74  | 38551.45  | 52917.13  | 50511.58  | 39163.7   | 47177.96  | 56033.64  | 39469.61  | 51546.29  | 44326.26  |
| 55373.38  | 35895.03  | 43580.05  | 52205.68  | 43295.41  | 46057.66  | 77228.49  | 47444.14  | 51353.46  | 41888.95  |

|           |           |           |           |           |           |           |           |           |           |
|-----------|-----------|-----------|-----------|-----------|-----------|-----------|-----------|-----------|-----------|
| LN300.991 |
| 39180.61  | 50504.86  | 74721.69  | 77774.22  | 35322.46  | 29156.5   | 39654.18  | 73254.6   | 37304.93  | 58013.64  |
| 42038.41  | 50910.43  | 67041.37  | 66094.4   | 38568.56  | 33628.18  | 50840.9   | 63799.99  | 31666.49  | 57531.04  |
| 42355.44  | 64380.35  | 82883.33  | 67882.88  | 36135.24  | 28226.66  | 58788.43  | 57924.81  | 49304.39  | 49763.07  |
| 43368.4   | 43777.05  | 62073.12  | 68360.02  | 44534.26  | 24973.97  | 44026.24  | 61138.94  | 38496.44  | 44216.77  |
| 28886.68  | 59621.16  | 65727.92  | 65806.19  | 37784.5   | 35306.6   | 48542.4   | 93337.05  | 50209.84  | 51652.85  |

|           |           |           |           |           |           |           |           |           |           |
|-----------|-----------|-----------|-----------|-----------|-----------|-----------|-----------|-----------|-----------|
| LN300.991 |
| 42032.31  | 24850.24  | 65725.66  | 40112.78  | 46526.67  | 63165.89  | 54515.5   | 56249.87  | 52364.91  | 32269.82  |
| 25819.7   | 26600.58  | 67144.93  | 55517.62  | 42511.03  | 75421.22  | 64517.14  | 58514.89  | 56659.47  | 30298.21  |
| 28381.05  | 29870.51  | 46761.96  | 38962.56  | 63347.81  | 57535.49  | 50262.16  | 51418.69  | 51058.72  | 50285.65  |
| 31842.39  | 26487.12  | 59230.08  | 47517.41  | 39796.02  | 50101.1   | 55386.93  | 50836.33  | 65928.94  | 33798.53  |
| 44043.98  | 31868.1   | 67001.48  | 35972.03  | 47389.38  | 93790.51  | 56972.73  | 47799.19  | 53720.36  | 46947.17  |

|           |           |           |           |           |           |           |           |           |           |
|-----------|-----------|-----------|-----------|-----------|-----------|-----------|-----------|-----------|-----------|
| LN300.991 |
| 85167.23  | 67556.11  | 32555.55  | 87937.12  | 34942.11  | 44506     | 47615.88  | 43137.22  | 51040.04  | 53653.3   |
| 97463.18  | 46531.06  | 29669.49  | 91489.7   | 35875.93  | 48960.64  | 66004.11  | 40652.4   | 49866.14  | 55152.81  |
| 79781.38  | 41653.98  | 18714.88  | 106306    | 28761.75  | 34263.73  | 44306.81  | 40996     | 41006.19  | 62672.2   |
| 104526.7  | 49636.09  | 20736.16  | 77043.2   | 32261.31  | 41886.58  | 69258.65  | 46953.51  | 39233.53  | 61461.59  |
| 101960    | 57554.34  | 21451.1   | 84332.84  | 35238.75  | 39176.7   | 67683.26  | 39444.35  | 56472.76  | 70424.68  |

|           |           |           |           |           |           |           |           |           |           |
|-----------|-----------|-----------|-----------|-----------|-----------|-----------|-----------|-----------|-----------|
| LN300.991 |
| 93147.54  | 65699.69  | 38081.92  | 58116.41  | 30253.71  | 91521.21  | 32661.58  | 83888.67  | 94061.86  | 93045.81  |
| 50452.94  | 49849.43  | 33060.79  | 47945.6   | 23537.98  | 77771.14  | 28771.71  | 82512.56  | 66069.2   | 72239.93  |
| 86014.51  | 44339.19  | 30342.28  | 47816.16  | 20411.28  | 87209.14  | 39585.34  | 84545.84  | 108932.2  | 82994.28  |
| 54836     | 55814.35  | 36207.07  | 46620.96  | 28302.72  | 83967.4   | 31532.84  | 83464.17  | 73075.39  | 60844.74  |
| 71517.83  | 50951.84  | 44850.4   | 51960.07  | 24656.73  | 103234.2  | 41711.27  | 70645.12  | 62459.57  | 81014.9   |

|           |           |           |           |           |           |           |           |           |           |
|-----------|-----------|-----------|-----------|-----------|-----------|-----------|-----------|-----------|-----------|
| LN300.991 |
| 33390.33  | 79540.47  | 62152.3   | 35959.78  | 40765.69  | 59166.19  | 28821.17  | 34331.73  | 71803.89  | 73292.59  |
| 32360.1   | 70206.57  | 102434.6  | 39828.99  | 34748.74  | 56550.06  | 32084.02  | 52693.51  | 60211.54  | 84333.2   |
| 34213.63  | 74668.36  | 84580.84  | 41033.41  | 38179.91  | 73439.04  | 40342.76  | 37652.42  | 106632.9  | 87594.64  |
| 33277.07  | 68920.23  | 79272.66  | 30656.01  | 38429.73  | 64639.86  | 42798.33  | 37436.47  | 59827.11  | 74243.58  |
| 32259.25  | 60484.61  | 72579.86  | 42729.25  | 30916.24  | 49687.04  | 30319.4   | 37011.11  | 61310.02  | 85198.85  |



|           |           |           |           |           |           |           |           |           |           |
|-----------|-----------|-----------|-----------|-----------|-----------|-----------|-----------|-----------|-----------|
| LN300.991 | LN301.166 |
| 23329.31  | 79079.05  | 71347.65  | 43755.69  | 48987.28  | 90615.8   | 21702.5   | 20072.71  | 63025.81  | 28959.69  |
| 20813.8   | 59197.48  | 52153.75  | 41361.55  | 46680.9   | 56173.78  | 25875.18  | 26780.76  | 44775.82  | 30075.51  |
| 18376.44  | 73551.48  | 82574.71  | 32705.97  | 53518.33  | 70449.27  | 32859.57  | 25012.65  | 69024.76  | 35485.18  |
| 22704.68  | 67309.85  | 57152.33  | 36764.73  | 56125.69  | 62717.88  | 27564.89  | 23223.13  | 65703.3   | 35802.33  |
| 16075.9   | 66209.61  | 60248.69  | 43234.75  | 54595.64  | 62342.89  | 19221.53  | 26274.05  | 68276.26  | 38687.63  |

|           |           |           |           |           |           |           |           |           |           |
|-----------|-----------|-----------|-----------|-----------|-----------|-----------|-----------|-----------|-----------|
| LN301.166 | LN301.165 | LN301.165 | LN301.238 |
| 11960.46  | 19126.69  | 21711.95  | 73299.71  | 12906.37  | 19762.06  | 22630.59  | 9900.409  | 24152.31  | 18663.8   |
| 12405.17  | 19019.07  | 20775.87  | 61420.87  | 11672.91  | 19833.94  | 23905.27  | 14513.56  | 22525.06  | 20103.28  |
| 13614.5   | 23856.41  | 25179.74  | 66042.12  | 15172.72  | 23549.03  | 28326.63  | 13114.42  | 26924.61  | 25241.04  |
| 17511.56  | 24952.34  | 27865.1   | 74701.7   | 19299.15  | 24732.91  | 30418.24  | 15721.27  | 30920.79  | 26584.25  |
| 16690.74  | 26419.76  | 26364.26  | 74162.46  | 18237.95  | 26870.94  | 31911.53  | 16196.42  | 32527.4   | 29520.63  |

|           |           |           |           |           |           |           |           |           |           |
|-----------|-----------|-----------|-----------|-----------|-----------|-----------|-----------|-----------|-----------|
| LN301.238 |
| 11308.47  | 21424     | 12239.6   | 23705.11  | 22977.52  | 24917.67  | 19923.16  | 22066.27  | 21888.12  | 17858.99  |
| 10851.17  | 22906.49  | 11977.16  | 23918.39  | 24460.84  | 25600.65  | 19955.78  | 22844.76  | 25273.11  | 18088.82  |
| 13119.51  | 26779.21  | 15739.87  | 29593.6   | 30545.5   | 30970.35  | 27403.19  | 25887.21  | 27361.11  | 21795.02  |
| 18042.56  | 30568.3   | 17628.07  | 31610.65  | 32993.35  | 34214.44  | 29915.38  | 30227.65  | 30318.92  | 25251.92  |
| 17452.66  | 32327.2   | 17795.48  | 34169.47  | 35184.79  | 36028.22  | 30081.93  | 33926.55  | 32526.24  | 27278.9   |

|           |           |           |           |           |           |           |           |           |           |
|-----------|-----------|-----------|-----------|-----------|-----------|-----------|-----------|-----------|-----------|
| LN301.238 |
| 18677.54  | 22420.39  | 17672.25  | 20714.55  | 18978.41  | 24686.86  | 20499.66  | 23658.39  | 21958.17  | 19344.05  |
| 21137.83  | 24991.2   | 17464.22  | 21989.8   | 17471.5   | 25530.21  | 19295.69  | 26754.02  | 22451.33  | 21293.03  |
| 23754.52  | 29778.52  | 22097.96  | 26976.43  | 22379.18  | 31834.91  | 25540.81  | 31968.35  | 29067.2   | 26355.77  |
| 28350.69  | 31658.9   | 26766.4   | 31394.51  | 25309.86  | 35790.74  | 27538.67  | 33581.96  | 31389.05  | 26221.53  |
| 29351.17  | 34278.77  | 29191.68  | 32342.68  | 27494.62  | 38067.81  | 30350.84  | 36576.21  | 31954.29  | 30112.44  |

|           |           |           |           |           |           |           |           |           |           |           |
|-----------|-----------|-----------|-----------|-----------|-----------|-----------|-----------|-----------|-----------|-----------|
| LN301.238 | LN302.942 | LN302.987 | LN303.913 |
| 19957.43  | 31232.33  | 20258.47  | 20060.29  | 36259.94  | 21869.41  | 22428.65  | 9746.93   | 41300.2   | 68413.73  |           |
| 18690.99  | 31164.22  | 21695.59  | 20754.3   | 33014.39  | 22467.87  | 23886.73  | 9620.428  | 38293     | 63557.46  |           |
| 24810.52  | 35508.25  | 26721.63  | 24219.08  | 40705.29  | 25572.62  | 27606.82  | 11333.17  | 41237.62  | 68150.32  |           |
| 28605.68  | 40294.35  | 29718     | 27464.08  | 42948.23  | 28986.44  | 31515.5   | 12342.01  | 40938.84  | 59402.95  |           |
| 29495.57  | 38288.44  | 33014.6   | 28879.48  | 46514.65  | 30751.05  | 34406.91  | 12933.4   | 42592.9   | 84758.45  |           |

| LN304.869 | LN304.908 | LN304.913 | LN304.914 | LN304.914 | LN305.002 | LN305.002 | LN305.002 | LN305.002 | LN305.002 |
|-----------|-----------|-----------|-----------|-----------|-----------|-----------|-----------|-----------|-----------|
| 100448.1  | 70875.89  | 67122.73  | 92496.9   | 99677.08  | 61533.49  | 46524.24  | 35593.77  | 62251.39  | 34304     |
| 18680.73  | 88339.6   | 65642.22  | 91870.34  | 99615.35  | 57851.88  | 49228.14  | 38124.29  | 61346.66  | 35564.09  |
| 98654.13  | 92301.3   | 68966.59  | 89889.19  | 93707.17  | 56142.69  | 48043.53  | 35029.3   | 60006.76  | 35371.39  |
| 86425.36  | 143142.3  | 62199.53  | 87046.56  | 95709.36  | 58474.88  | 48342.9   | 41623.05  | 60995.59  | 35938.74  |
| 103081.5  | 121482.6  | 62271.16  | 91788.69  | 94496.88  | 56261.29  | 46010.86  | 42233     | 58125.47  | 35497.38  |

|           |           |           |           |           |           |           |           |           |           |
|-----------|-----------|-----------|-----------|-----------|-----------|-----------|-----------|-----------|-----------|
| LN305.002 |
| 52273.14  | 34236.15  | 29154.95  | 57707.85  | 29400.79  | 32274.75  | 25788.02  | 29099.45  | 35905.87  | 36749.03  |
| 49715.2   | 30350.68  | 31495.02  | 57038.85  | 28122.05  | 31868.53  | 26435.06  | 29687.58  | 35511.45  | 34153.23  |
| 46374.06  | 32746.01  | 26571.44  | 58668.89  | 29788.77  | 33407.25  | 24866.24  | 27751.35  | 37535.17  | 34556.76  |
| 51488.66  | 31510.09  | 27925.92  | 58391.57  | 29598.85  | 32401.86  | 27910.14  | 28096.23  | 37271.49  | 38771.03  |
| 51012.1   | 35505.72  | 27417.2   | 59193.81  | 31648.27  | 31603.55  | 23243.71  | 27827.34  | 35221.23  | 34700.15  |

|           |           |           |           |           |           |           |           |           |           |
|-----------|-----------|-----------|-----------|-----------|-----------|-----------|-----------|-----------|-----------|
| LN305.002 |
| 49794.41  | 32814.53  | 27546.2   | 32578.91  | 38004.06  | 32837.9   | 30221.12  | 32291.1   | 30840.65  | 36920.19  |
| 51028.34  | 33804.37  | 28009.58  | 34681.36  | 39650.1   | 33467.74  | 30010.52  | 34346.21  | 30689.69  | 35502.09  |
| 49628.88  | 35357.93  | 24498.22  | 35322.86  | 40341.83  | 34131.01  | 30015.5   | 31280.42  | 32652.54  | 38120.47  |
| 54044.8   | 33131.76  | 27245.68  | 36341.73  | 37622.91  | 30014.51  | 29262.99  | 32981.79  | 30293.96  | 38015.02  |
| 46505.74  | 30354.56  | 25995.1   | 33353.25  | 35677.18  | 30407.34  | 31031.9   | 32669.97  | 28330.67  | 37332.21  |



|           |           |           |           |           |           |           |           |           |           |
|-----------|-----------|-----------|-----------|-----------|-----------|-----------|-----------|-----------|-----------|
| LN305.002 |
| 41983.95  | 27358.87  | 33873.19  | 26800.3   | 35721.74  | 48797     | 47544     | 33257.49  | 27153.39  | 37889.04  |
| 40834.71  | 30181.11  | 33976.84  | 27395.78  | 36406.74  | 47614.51  | 46220.79  | 34670.88  | 27591.17  | 42556.03  |
| 42157.05  | 29406.45  | 30949.58  | 28032.59  | 38885.77  | 49930.9   | 47251.11  | 34987.93  | 32190.88  | 35295.58  |
| 40956.61  | 28497.79  | 31395.42  | 27356.69  | 37028.99  | 47864.13  | 50260.78  | 35346.19  | 28438.07  | 38443.35  |
| 38583.81  | 29767.8   | 29619.97  | 25869.44  | 40337.61  | 49523.71  | 44775.61  | 31006.9   | 30371.36  | 36717.33  |

|           |           |           |           |           |           |           |           |           |           |
|-----------|-----------|-----------|-----------|-----------|-----------|-----------|-----------|-----------|-----------|
| LN305.003 | LN305.003 | LN305.002 | LN305.003 |
| 35437.64  | 13488.53  | 25881.61  | 21476.49  | 17322.36  | 13054.32  | 33408.99  | 33474.25  | 28324.81  | 31326.29  |
| 37174.11  | 11829.36  | 25207.76  | 24589.02  | 17581.24  | 12812.91  | 37790.37  | 32634.9   | 27363.6   | 28667.66  |
| 34602.54  | 12547.52  | 21749.1   | 23124.64  | 16469.4   | 14776.78  | 32022.33  | 34951.62  | 26705.71  | 30517.82  |
| 34369.82  | 13631.63  | 21611.82  | 20549.43  | 14925.58  | 14383.84  | 33167.45  | 32317.11  | 27406.66  | 29731.5   |
| 34324.62  | 11606.65  | 22136.85  | 21976.46  | 16145.23  | 13840.88  | 33296.12  | 38435.33  | 27176.96  | 30277.75  |

|           |           |           |           |           |           |           |           |           |           |
|-----------|-----------|-----------|-----------|-----------|-----------|-----------|-----------|-----------|-----------|
| LN305.003 |
| 23645.9   | 18329.25  | 18388.1   | 19429.08  | 14806.42  | 14494.38  | 22922.19  | 18633.57  | 20804.97  | 28652.7   |
| 23335.71  | 17153.32  | 21626.93  | 19747.02  | 14413.33  | 12409.85  | 21483.21  | 17826.43  | 19338.78  | 28892.21  |
| 25838.75  | 17379.79  | 20117.89  | 19940.07  | 13166.86  | 10457.76  | 21784.83  | 17955.47  | 21519.49  | 28997.54  |
| 24754.36  | 15267.74  | 19757.45  | 19689.21  | 14457.12  | 14497.97  | 21257.73  | 15310.77  | 17832.51  | 29210.71  |
| 27112.9   | 18421.76  | 20458.32  | 21050.39  | 11859.63  | 10961.1   | 20744.78  | 15740.19  | 18956.87  | 27310.13  |

|           |           |           |           |           |           |           |           |           |           |
|-----------|-----------|-----------|-----------|-----------|-----------|-----------|-----------|-----------|-----------|
| LN305.003 |
| 23388.68  | 26222.51  | 19193.46  | 21858.68  | 19644.28  | 16306.05  | 36299.33  | 30965.05  | 13705.21  | 28154.27  |
| 21121.64  | 28808.01  | 19837.38  | 20965.38  | 19258.29  | 14045.25  | 38438.78  | 31680.9   | 14940.88  | 30252.16  |
| 23413.42  | 26283.36  | 19980.07  | 22186.11  | 20381.16  | 16840.32  | 40209.88  | 30772.89  | 13909.31  | 29510.41  |
| 21026.74  | 24175.85  | 17753.59  | 21497.06  | 17010.94  | 15962.53  | 38330.74  | 30577.22  | 13941.18  | 27010.26  |
| 22602.51  | 26929.08  | 18215.39  | 19742.32  | 18907.64  | 14559.17  | 34997.13  | 31290.28  | 12334.25  | 28575.69  |

|           |           |           |           |           |           |           |           |           |           |
|-----------|-----------|-----------|-----------|-----------|-----------|-----------|-----------|-----------|-----------|
| LN305.003 |
| 19408.01  | 21323.89  | 20469.62  | 19509.2   | 24931.49  | 15523.44  | 16866.25  | 24977.32  | 24330.49  | 25464.3   |
| 17753.03  | 18233.31  | 24412.78  | 20583.14  | 30006.88  | 15559.84  | 17862.65  | 23861.65  | 24566.89  | 23930.94  |
| 19931.46  | 21641.9   | 21544.21  | 20231.45  | 28614.67  | 16771.67  | 15422.57  | 22682.87  | 21939.26  | 25529.68  |
| 19031.78  | 20408.11  | 21954.61  | 20253.65  | 25126.54  | 13489.74  | 17929.71  | 23161.74  | 24269.37  | 25077.39  |
| 16454.19  | 19987.53  | 23699.85  | 18682.82  | 27143.19  | 15352.63  | 17379.89  | 22550.14  | 22082.16  | 25072.47  |

|           |           |           |           |           |           |           |           |           |           |
|-----------|-----------|-----------|-----------|-----------|-----------|-----------|-----------|-----------|-----------|
| LN305.002 | LN305.003 |
| 24569.59  | 32744.18  | 24820.93  | 19495.74  | 19768.09  | 22458.72  | 19235.2   | 36797.25  | 17895.51  | 28965.35  |
| 26198.43  | 30197.18  | 24665.27  | 20495.13  | 19086.2   | 23305.76  | 19732.19  | 30187.79  | 19109.54  | 29597.98  |
| 23859.87  | 28136.39  | 22845.24  | 20600.64  | 19397.38  | 22355.21  | 19155.3   | 31415.31  | 16851.32  | 30567.26  |
| 27851.81  | 33210.04  | 23904.9   | 18907.07  | 18767.8   | 20229.07  | 18211.87  | 31989.41  | 16695.48  | 29950.83  |
| 26151.2   | 27359.2   | 26219.7   | 21764.92  | 19699.46  | 21983.33  | 18650.86  | 34999.78  | 17130     | 26286.56  |

|           |           |           |           |           |           |           |           |           |           |
|-----------|-----------|-----------|-----------|-----------|-----------|-----------|-----------|-----------|-----------|
| LN305.003 | LN305.003 | LN305.023 | LN305.860 |
| 23121.37  | 28885.23  | 36344.23  | 36051.99  | 40475.97  | 31984.62  | 35639.39  | 37031.41  | 36135.54  | 35082.12  |
| 21117.54  | 27571.99  | 36452.32  | 35475.87  | 43965.18  | 31557.75  | 34066.54  | 33056.09  | 38941.74  | 31638.22  |
| 21029.13  | 27619.87  | 34112.98  | 34966.5   | 44736.03  | 28337.61  | 35822.2   | 32702.16  | 35186.6   | 33952.02  |
| 20377.3   | 23317.87  | 34510.53  | 33105.99  | 37376.13  | 30902.01  | 32386.37  | 35241.28  | 37363.95  | 43841.77  |
| 20963.2   | 24669.12  | 35313.48  | 33477.3   | 41104.22  | 28544.03  | 29790.67  | 32496.32  | 34785.09  | 54465.43  |

|           |           |           |           |           |           |           |           |           |           |
|-----------|-----------|-----------|-----------|-----------|-----------|-----------|-----------|-----------|-----------|
| LN306.056 | LN306.057 | LN306.906 | LN306.919 | LN306.919 | LN306.919 | LN306.918 | LN306.919 | LN306.919 | LN306.919 |
| 17579.41  | 18468.01  | 65988.09  | 92020.8   | 149202    | 75024.67  | 232041    | 150454.1  | 215982.4  | 217125.6  |
| 18914.46  | 17017.87  | 31793.5   | 94125.37  | 150972.7  | 63927.48  | 213877.4  | 175395.9  | 218672.6  | 213354.7  |
| 19285.63  | 19376.33  | 42570.19  | 115473.1  | 170169.6  | 63733.24  | 183984.4  | 127240.2  | 217015    | 176187.3  |
| 18349.58  | 19214.71  | 44185.68  | 136090.3  | 124962.2  | 91512.97  | 190646    | 141476.8  | 233827.8  | 221415.7  |
| 16134.66  | 18148.98  | 57936.71  | 114411.1  | 133343.7  | 76183.53  | 190693.2  | 187664    | 194775.4  | 210717.2  |



|           |           |           |           |           |           |           |           |           |           |
|-----------|-----------|-----------|-----------|-----------|-----------|-----------|-----------|-----------|-----------|
| LN306.919 | LN306.919 | LN306.919 | LN306.919 | LN306.919 | LN306.918 | LN306.918 | LN306.919 | LN306.919 | LN306.919 |
| 298087    | 196268.9  | 110549.5  | 70872.26  | 201078.9  | 207347.3  | 232898.9  | 163932.3  | 92393.9   | 79941.97  |
| 214956.3  | 213726.5  | 95735.25  | 72820.25  | 184653    | 181953.9  | 164982.3  | 158679.2  | 93660.82  | 80087.28  |
| 214289    | 255285.7  | 64470.09  | 71853.13  | 152179.3  | 196292.1  | 180668.4  | 144245.6  | 92875.45  | 84393.18  |
| 230427.8  | 174890    | 126678.5  | 66792.1   | 168258.4  | 185240    | 228970.7  | 147266.1  | 84835.66  | 82526.75  |
| 227378.4  | 300269.7  | 84987.71  | 68657.3   | 154168.6  | 175611.6  | 224918.6  | 169601.1  | 87473.03  | 94432.65  |

|           |           |           |           |           |           |           |           |           |           |
|-----------|-----------|-----------|-----------|-----------|-----------|-----------|-----------|-----------|-----------|
| LN306.919 | LN306.918 | LN306.918 |
| 176668.6  | 146155.4  | 189957.9  | 176515    | 196483    | 210785    | 142339.8  | 174990.2  | 207951.8  | 151501.6  |
| 182498.9  | 175770    | 215489.2  | 200212.7  | 132143.3  | 278944.2  | 196335.1  | 210479    | 201627.8  | 151480.8  |
| 224011    | 173091.6  | 181170.6  | 191407.6  | 182570.5  | 220615    | 140118.2  | 145097.6  | 163581.5  | 142159.7  |
| 181611.9  | 155877.1  | 221792.7  | 190057    | 188156.1  | 146936.5  | 181384.2  | 186523.3  | 253816.6  | 149441.3  |
| 170690.7  | 132420.5  | 208328.9  | 150835.3  | 189936.2  | 193863.7  | 151845.4  | 229450.8  | 159840    | 144150.3  |

|           |           |           |           |           |           |           |           |           |           |
|-----------|-----------|-----------|-----------|-----------|-----------|-----------|-----------|-----------|-----------|
| LN306.919 | LN306.919 | LN306.919 | LN306.919 | LN306.919 | LN306.919 | LN306.918 | LN306.918 | LN306.919 | LN306.919 |
| 164375.2  | 233939.2  | 208519.3  | 167331.5  | 213720.2  | 112830.8  | 143362.2  | 245343.4  | 98425.39  | 202266.9  |
| 137187.8  | 222770.2  | 189423.1  | 159700.5  | 218157.5  | 161752.5  | 134736.3  | 194397    | 117852.2  | 196924.9  |
| 131356.8  | 253489.8  | 202134.2  | 212484.2  | 227526.8  | 122389.6  | 146138.3  | 196317.8  | 104431.9  | 251186.6  |
| 133095.3  | 243314.1  | 199668.3  | 112804.7  | 226780.8  | 110669.2  | 152642.7  | 267229.1  | 91814.18  | 181235.7  |
| 141866.3  | 188432    | 217911.5  | 145482.3  | 193882.7  | 162229.9  | 134985.6  | 187006.3  | 101368.1  | 175721.9  |

|           |           |           |           |           |           |           |           |           |           |
|-----------|-----------|-----------|-----------|-----------|-----------|-----------|-----------|-----------|-----------|
| LN306.919 | LN306.919 | LN306.919 | LN306.919 | LN306.918 | LN306.919 | LN306.919 | LN306.919 | LN306.919 | LN306.919 |
| 150389.6  | 113502.7  | 154963.8  | 125230.2  | 151514.9  | 142278.8  | 108573.8  | 108014    | 122245.3  | 148913.5  |
| 134159.3  | 160068.1  | 98488.8   | 151341.6  | 241816.6  | 158852    | 149920.6  | 122337.7  | 136176.2  | 137900.9  |
| 145494.7  | 157594.3  | 147967.5  | 122374.1  | 184764.3  | 133017.9  | 114832.3  | 129465.4  | 126057.6  | 135219    |
| 154239.4  | 157963.9  | 154778.1  | 139186.6  | 160363.8  | 144687.6  | 114926.3  | 109383.7  | 123291.2  | 163063.6  |
| 150543.8  | 157792.3  | 144003.9  | 88407.06  | 148725.4  | 139117.7  | 104662.2  | 115015.7  | 121735.9  | 128031.1  |

|           |           |           |           |           |           |           |           |           |           |
|-----------|-----------|-----------|-----------|-----------|-----------|-----------|-----------|-----------|-----------|
| LN306.919 | LN306.919 | LN306.919 | LN306.918 | LN306.919 | LN306.919 | LN306.919 | LN306.919 | LN306.919 | LN306.919 |
| 122834.2  | 110617.7  | 142337.3  | 108520.2  | 110203.8  | 101630.5  | 127068.2  | 86510.07  | 99297.73  | 120139.2  |
| 115615.2  | 115085.7  | 166541.5  | 120164.3  | 132369.8  | 100564.2  | 135754.1  | 79590.87  | 100611.7  | 126954.9  |
| 122570.9  | 111300.5  | 144168.9  | 105522.9  | 114030.3  | 115579.5  | 128723.1  | 84265.27  | 101720.4  | 121537.6  |
| 122197.3  | 107869.1  | 145839.7  | 101804.2  | 119419.5  | 99601.72  | 140870.7  | 88779.01  | 104383.3  | 122647.4  |
| 115136.6  | 104877.4  | 101663.5  | 96762.17  | 115556.2  | 95556.42  | 128168.3  | 80618.56  | 91707.78  | 127591.2  |

|           |           |           |           |           |           |           |           |           |           |
|-----------|-----------|-----------|-----------|-----------|-----------|-----------|-----------|-----------|-----------|
| LN306.919 | LN306.918 | LN306.919 | LN306.919 | LN306.999 | LN306.999 | LN307.14_ | LN307.140 | LN307.14_ | LN307.14_ |
| 55378.54  | 87819.64  | 66649.85  | 137935.5  | 33725.2   | 28878.15  | 26596.84  | 20231.07  | 20455.79  | 15869.56  |
| 60355.62  | 91262.57  | 73343.22  | 135979.9  | 29857.04  | 26024.38  | 23972.19  | 19344.07  | 19574.82  | 16227.1   |
| 65791.02  | 89684.65  | 68566.14  | 130071.3  | 35800.77  | 26151.47  | 30154.91  | 18627.12  | 20957.37  | 15677.52  |
| 59845.67  | 84349.29  | 60065.77  | 142576.8  | 29932.18  | 24979.37  | 24811.8   | 17530.38  | 18860.82  | 14676.21  |
| 54212.84  | 88448.4   | 64331.03  | 141468.2  | 32536.11  | 26258.46  | 27446.98  | 17924.78  | 19206.02  | 15376.55  |

|           |           |           |           |           |           |           |           |           |           |           |
|-----------|-----------|-----------|-----------|-----------|-----------|-----------|-----------|-----------|-----------|-----------|
| LN307.140 | LN307.855 | LN308.863 | LN308.917 |
| 23480.77  | 16132.85  | 23555.32  | 14039.86  | 14354.85  | 13418.68  | 20132.79  | 395710.7  | 120523.2  | 41346.58  |           |
| 26546.39  | 15237.23  | 26138.73  | 14357.05  | 14043.23  | 15074.08  | 22187.04  | 283827    | 108585.5  | 43842.42  |           |
| 22595.64  | 18090.94  | 26784.99  | 11768.84  | 14440.39  | 14339.13  | 19262.28  | 413488.3  | 137421.1  | 45072.15  |           |
| 26745.89  | 15674.33  | 25840.84  | 10637.47  | 12193.1   | 10237.95  | 20013.3   | 464904    | 148137.5  | 42520.28  |           |
| 21484.21  | 16057.39  | 23013.86  | 13444.26  | 12906.58  | 12185.41  | 19183.49  | 422139.6  | 181930.5  | 45057.6   |           |

|           |           |           |           |           |           |           |           |           |           |
|-----------|-----------|-----------|-----------|-----------|-----------|-----------|-----------|-----------|-----------|
| LN308.997 | LN308.997 | LN308.997 | LN308.997 | LN308.997 | LN308.998 | LN308.998 | LN308.997 | LN308.997 | LN308.997 |
| 99342.61  | 79907.63  | 62646.9   | 109662.5  | 128433.4  | 79600.7   | 40222.52  | 103228.2  | 87454.41  | 92895.36  |
| 193939.5  | 89727.84  | 56422.74  | 83422.86  | 99879.57  | 72077.03  | 38086.27  | 94199.21  | 83933.67  | 95035.9   |
| 167321.9  | 69888.61  | 69714.64  | 112895.8  | 96250     | 51850.93  | 29002.52  | 91810.49  | 86432.77  | 99244.16  |
| 126783    | 64285.13  | 65435.39  | 69664.94  | 123673.8  | 77618.91  | 33830.93  | 102159.5  | 60322.71  | 121523.8  |
| 117185.6  | 59847.45  | 49646.79  | 67408.54  | 113499.5  | 72194.96  | 36729.7   | 82961.51  | 80859.49  | 105192    |



|           |           |           |           |           |           |           |           |           |           |
|-----------|-----------|-----------|-----------|-----------|-----------|-----------|-----------|-----------|-----------|
| LN308.997 | LN308.997 | LN308.997 | LN308.997 | LN308.998 | LN308.998 | LN308.997 | LN308.997 | LN308.998 | LN308.998 |
| 118867.9  | 113932    | 72541.55  | 124369.5  | 53066.33  | 60919.16  | 19841.31  | 108830.8  | 27108.42  | 46473.02  |
| 84975.81  | 133240.1  | 54560.7   | 134515.3  | 47309.63  | 42118.4   | 24961.61  | 71029.51  | 34918.24  | 46009.78  |
| 69033.42  | 71059.91  | 99435.46  | 136905.7  | 62388.74  | 61146.39  | 22302.63  | 111009.5  | 33802.23  | 43811     |
| 73866.8   | 80607.53  | 70233.99  | 159480.7  | 43220.63  | 38947.42  | 25125.32  | 109944.7  | 33551.2   | 37941.2   |
| 89004.26  | 62076.86  | 77079.06  | 137686.6  | 60961.57  | 45358.89  | 25344.53  | 84827.68  | 22165.99  | 45175.33  |

|           |           |           |           |           |           |           |           |           |           |
|-----------|-----------|-----------|-----------|-----------|-----------|-----------|-----------|-----------|-----------|
| LN308.998 | LN308.997 |
| 44785.16  | 116715.7  | 173532.1  | 118792.6  | 105934.8  | 92488.1   | 103414.8  | 128993.3  | 78732.08  | 131795.5  |
| 34887.66  | 122745.8  | 126136.4  | 92937.05  | 125236.1  | 107855.8  | 124305.1  | 99860.36  | 108505.5  | 126523.9  |
| 37966.75  | 124873.5  | 123789.5  | 119493.8  | 113176.4  | 101820.1  | 191807.7  | 113911.1  | 71645.26  | 80993.32  |
| 47068.1   | 123081.7  | 177629.4  | 129416.2  | 84160.88  | 137055.9  | 123077.3  | 99257.67  | 94091.04  | 117771.8  |
| 50581.16  | 115180.8  | 155299.7  | 105789.9  | 99149.86  | 61434.64  | 87099.14  | 139188.7  | 84234.59  | 103650    |

|           |           |           |           |           |           |           |           |           |           |
|-----------|-----------|-----------|-----------|-----------|-----------|-----------|-----------|-----------|-----------|
| LN308.997 | LN308.998 | LN308.997 | LN308.998 |
| 97335.1   | 104879.9  | 56696.52  | 78710.41  | 124190.9  | 50368.14  | 133727.8  | 57233.77  | 54651.91  | 69622.46  |
| 122082.1  | 121467.3  | 74491     | 60475.37  | 112406.3  | 82885.09  | 80693.58  | 44990.71  | 42650.91  | 63007.87  |
| 112308.8  | 90607.82  | 72303.54  | 88023.59  | 130125.5  | 73836.66  | 104052.6  | 58811.77  | 100905.2  | 49596.57  |
| 75016.45  | 93591.82  | 90078.98  | 83582.43  | 112475.6  | 48198.35  | 101262.7  | 47443.89  | 60616.21  | 74480.09  |
| 141302.3  | 84130.15  | 52678.87  | 66467.43  | 95821.48  | 62184.08  | 89559.81  | 64296.61  | 53530.91  | 48524.32  |

|           |           |           |           |           |           |           |           |           |           |
|-----------|-----------|-----------|-----------|-----------|-----------|-----------|-----------|-----------|-----------|
| LN308.997 | LN308.997 | LN308.997 | LN308.997 | LN308.998 | LN308.998 | LN308.998 | LN308.997 | LN308.997 | LN308.997 |
| 97279.95  | 161731.3  | 109124.7  | 113657.8  | 97387.9   | 63124.2   | 35368.52  | 129773.8  | 127771.4  | 64224.68  |
| 93578.22  | 83027.93  | 81808.53  | 87055.75  | 103169.4  | 67583.43  | 36196.17  | 130490.1  | 111375.3  | 77107.2   |
| 111117.3  | 96146.2   | 97945.14  | 89962.07  | 94751.6   | 61967.41  | 23426.03  | 114968.2  | 142119.7  | 64653.05  |
| 102804.2  | 91130.58  | 83526.11  | 93698.25  | 60320.96  | 89880.42  | 38520.29  | 100151.3  | 123742.1  | 53862.19  |
| 115447.8  | 97737.04  | 99563.96  | 63145.52  | 95799.76  | 64193.28  | 35993.68  | 81027.44  | 86709.47  | 68995.9   |

|           |           |           |           |           |           |           |           |           |           |
|-----------|-----------|-----------|-----------|-----------|-----------|-----------|-----------|-----------|-----------|
| LN308.998 | LN308.997 | LN308.997 | LN308.997 | LN308.997 | LN308.997 | LN308.998 | LN308.997 | LN308.997 | LN308.998 |
| 27144.42  | 164764    | 80819.24  | 80581.67  | 106905.2  | 93404.09  | 64657.49  | 156101.5  | 98466.13  | 49057.57  |
| 33709.42  | 164658    | 73440.24  | 56180.86  | 86751.6   | 47220.34  | 81774.49  | 162499.1  | 148509    | 69467     |
| 20760.59  | 139114.8  | 71679.48  | 86642.37  | 81361.14  | 59962.4   | 91609.22  | 129879.5  | 189401.6  | 65952.21  |
| 35344.88  | 131482.3  | 69528.27  | 54056.27  | 119229.6  | 59639.64  | 67696.35  | 135380.7  | 136642.4  | 71367.22  |
| 31480.23  | 181636.9  | 58135.56  | 89961.7   | 105850.6  | 87626.26  | 57842.34  | 107903    | 124079.3  | 56668.4   |

|           |           |           |           |           |           |           |           |           |           |
|-----------|-----------|-----------|-----------|-----------|-----------|-----------|-----------|-----------|-----------|
| LN308.998 | LN308.998 | LN308.998 | LN308.997 | LN308.998 | LN308.997 | LN308.997 | LN308.998 | LN308.997 | LN308.997 |
| 31388.02  | 33617.72  | 41914.19  | 109843.7  | 58072.99  | 163036.3  | 86959.52  | 33919.74  | 114184.5  | 160191.8  |
| 37137.84  | 31771.47  | 41314.69  | 132685.9  | 70636.45  | 123939.4  | 95210.79  | 24075.35  | 112645.5  | 132799.5  |
| 30845.83  | 28699.66  | 36596.65  | 112674    | 70829.74  | 154358.5  | 118649.6  | 44364.51  | 104615.7  | 146632.2  |
| 28274.79  | 34071.62  | 32864.62  | 113523.1  | 70426.51  | 112397.5  | 136375.2  | 57163.25  | 109515.6  | 188011.8  |
| 44653.21  | 30044.17  | 34701.66  | 131710.9  | 60863.49  | 137958.2  | 106736.7  | 23747.03  | 132734.8  | 133739.8  |

|           |           |           |           |           |           |           |           |           |           |
|-----------|-----------|-----------|-----------|-----------|-----------|-----------|-----------|-----------|-----------|
| LN308.998 | LN308.997 | LN308.997 | LN308.997 | LN308.997 | LN308.998 | LN308.997 | LN308.997 | LN308.997 | LN308.997 |
| 61226.65  | 74228.24  | 88729.99  | 126033.1  | 172326.3  | 33103.75  | 88437.27  | 82054.89  | 155975.6  | 142632.9  |
| 58961.01  | 80382.59  | 57671.29  | 131432.8  | 107737.7  | 36941.37  | 61684.97  | 89448.53  | 119058    | 110372.7  |
| 63159.05  | 47088.42  | 73416.09  | 141929.7  | 133076.9  | 43899.59  | 62125.54  | 72119.27  | 92818.83  | 99844.99  |
| 55475.56  | 58606.26  | 69569.55  | 109413.4  | 128350.3  | 35487.82  | 78245.99  | 79165.85  | 94000.45  | 115420.2  |
| 63832.65  | 52339.99  | 125774.9  | 100309.1  | 112965.6  | 38728.04  | 76275.15  | 67953.83  | 101926.5  | 103524.6  |

|           |           |           |           |           |           |           |           |           |           |
|-----------|-----------|-----------|-----------|-----------|-----------|-----------|-----------|-----------|-----------|
| LN308.997 | LN308.997 | LN309.855 | LN310.858 | LN310.931 | LN310.930 | LN310.931 | LN310.931 | LN310.931 | LN310.930 |
| 72186.35  | 105357.3  | 33637.81  | 142347.9  | 232760.2  | 293426.8  | 289829    | 145418.2  | 157910.3  | 384605.4  |
| 84985.81  | 118784.8  | 26539.96  | 143335.8  | 185981.5  | 256100.2  | 188744.8  | 133152.4  | 204882.8  | 361408    |
| 72521.08  | 136389.4  | 27333.33  | 148812.5  | 211489.6  | 349221.4  | 205780.3  | 161895.3  | 261023.5  | 316955.6  |
| 73026.6   | 135340.1  | 35175.14  | 153645.8  | 184195.8  | 389648.5  | 243919.7  | 195326.1  | 173576.8  | 356426.5  |
| 61039.25  | 92194.17  | 32850.38  | 189150.1  | 243801.1  | 231621    | 244534    | 194186.4  | 210173.2  | 214864.8  |



|           |           |           |           |           |           |           |           |           |           |
|-----------|-----------|-----------|-----------|-----------|-----------|-----------|-----------|-----------|-----------|
| LN310.930 | LN310.931 | LN310.930 | LN310.930 | LN310.931 | LN310.931 | LN310.930 | LN310.930 | LN310.931 | LN310.931 |
| 357448.6  | 248223.1  | 263513.8  | 300201.3  | 300560.3  | 195279.2  | 214318.3  | 437370.2  | 204218.2  | 135582.9  |
| 415285.7  | 236783.6  | 354673.4  | 248542.5  | 350464.3  | 176032.5  | 187874    | 324210.6  | 298006.8  | 194114.9  |
| 339762.6  | 286933.9  | 239237.9  | 205524.4  | 628630.2  | 247620.2  | 207322.3  | 357910.4  | 312119.9  | 132416.1  |
| 436147.7  | 225955    | 273046.4  | 456272.9  | 389477.8  | 196817.4  | 327993.3  | 247793.2  | 346799    | 195049.8  |
| 257313.4  | 219180.1  | 292411    | 369759.1  | 390465.3  | 207435.3  | 239342    | 301665.1  | 227907.2  | 171994.4  |

|           |           |           |           |           |           |           |           |           |           |
|-----------|-----------|-----------|-----------|-----------|-----------|-----------|-----------|-----------|-----------|
| LN310.930 | LN310.931 |
| 284965.4  | 150502.5  | 258967.9  | 372284.9  | 270864.4  | 301743.8  | 350164.8  | 148701.2  | 256688.9  | 144588.9  |
| 200069.2  | 154782.5  | 273436.5  | 249437.4  | 267602.6  | 241837.1  | 351414.4  | 164158.9  | 397049.6  | 175391.2  |
| 285255.4  | 144506.8  | 376623.8  | 286825.9  | 319399.6  | 355055.2  | 245702    | 119973.2  | 290329    | 178939.6  |
| 256188.6  | 120645.6  | 323162.6  | 218734.6  | 300029.3  | 368525.8  | 267978.6  | 194986.9  | 296702.6  | 117232.2  |
| 305091.4  | 116653.9  | 282205.5  | 220847.1  | 221297.6  | 296913.7  | 217408.7  | 125160.4  | 283808.2  | 134486.8  |

|           |           |           |           |           |           |           |           |           |           |
|-----------|-----------|-----------|-----------|-----------|-----------|-----------|-----------|-----------|-----------|
| LN310.931 | LN310.931 | LN310.931 | LN310.931 | LN310.931 | LN310.931 | LN310.930 | LN310.930 | LN310.931 | LN310.931 |
| 289980.5  | 256172.5  | 239133.1  | 188216    | 231365.3  | 288110.4  | 255063.1  | 82693.84  | 349560.2  | 271354.1  |
| 286305.9  | 291424.8  | 188093.5  | 108230.1  | 234262.2  | 412647.5  | 281976.7  | 88521.21  | 275831.6  | 249952.4  |
| 329273.4  | 288669    | 244246.2  | 159442.5  | 195489.1  | 383562.6  | 374118.2  | 121799.3  | 326888    | 459096.4  |
| 245276.6  | 346840.2  | 190087.8  | 141941.4  | 182564.1  | 320661.2  | 321322.2  | 96769.93  | 334846.6  | 328730.3  |
| 295843.1  | 284243.9  | 163773.7  | 172107.6  | 211995.5  | 386271.6  | 257691.4  | 56278.52  | 326381.1  | 393755.3  |

|           |           |           |           |           |           |           |           |           |           |
|-----------|-----------|-----------|-----------|-----------|-----------|-----------|-----------|-----------|-----------|
| LN310.931 | LN310.931 | LN310.931 | LN310.930 | LN310.931 | LN310.931 | LN310.931 | LN310.931 | LN310.931 | LN310.931 |
| 414809    | 338875.9  | 291287.4  | 324210.9  | 312366.7  | 293370.8  | 428182.2  | 175180.7  | 342783.4  | 420349.3  |
| 344918.7  | 264740    | 303330.7  | 355553    | 272294.2  | 238689    | 329366.4  | 175825.6  | 350039.1  | 257581.5  |
| 392442.9  | 291068.1  | 255293.3  | 212780.8  | 297725.3  | 396520.8  | 379490    | 129106.6  | 296226.5  | 389750.9  |
| 273357.1  | 282782.8  | 306575.1  | 222216.5  | 318584.9  | 221951.9  | 302034.5  | 156655.8  | 345056.7  | 301091.4  |
| 362484.1  | 309826.8  | 321185.7  | 190538    | 293075.4  | 241642.7  | 338801.6  | 194626.6  | 333494.8  | 253052.9  |

|           |           |           |           |           |           |           |           |           |           |
|-----------|-----------|-----------|-----------|-----------|-----------|-----------|-----------|-----------|-----------|
| LN310.930 | LN310.931 | LN310.931 | LN310.930 | LN310.931 | LN310.930 | LN310.930 | LN310.931 | LN310.930 | LN310.931 |
| 66763.24  | 299472    | 338300.9  | 361269.7  | 277838.2  | 150686.1  | 169082.8  | 261729.6  | 352617.9  | 142620.2  |
| 67627.14  | 355988.6  | 285844.3  | 197973.8  | 390947.8  | 174098.4  | 257596.4  | 191701.4  | 301400.8  | 78920.14  |
| 62592.25  | 268691.2  | 184611.4  | 187384.7  | 275678.4  | 143064.5  | 169808.5  | 137228.9  | 306830.1  | 93989.63  |
| 45859.9   | 285281.9  | 329218    | 215365.3  | 300367.1  | 141263.9  | 153665.9  | 187827.1  | 430352.1  | 75954.85  |
| 98386.7   | 355325.2  | 327282.1  | 220218.4  | 384955.4  | 146702.9  | 319156.8  | 167608.5  | 331289.8  | 68589.17  |

|           |           |           |           |           |           |           |           |           |           |
|-----------|-----------|-----------|-----------|-----------|-----------|-----------|-----------|-----------|-----------|
| LN310.930 | LN310.931 | LN310.931 | LN310.931 | LN310.931 | LN310.931 | LN310.931 | LN310.930 | LN310.931 | LN310.931 |
| 71055.64  | 427207.9  | 199718.1  | 313375.5  | 160239.4  | 215282.9  | 352263.9  | 298750.4  | 155694.7  | 150917.4  |
| 48928.64  | 274258.7  | 421996.9  | 287794.3  | 192460.3  | 275703.1  | 301831.6  | 274091.8  | 129614.6  | 136639.8  |
| 71881.35  | 406336.5  | 293867.5  | 346748.6  | 157540.7  | 259192.2  | 299658.8  | 328887    | 176631.1  | 145576.7  |
| 57555.72  | 316151.9  | 283789.2  | 241733.4  | 212065.4  | 262248.4  | 544186.9  | 239312.4  | 210126.7  | 82812.16  |
| 60262.57  | 259900.7  | 288572.8  | 333265.9  | 149853    | 254382.8  | 230552.2  | 308969    | 140564.1  | 102716.6  |

|           |           |           |           |           |           |           |           |           |           |
|-----------|-----------|-----------|-----------|-----------|-----------|-----------|-----------|-----------|-----------|
| LN310.931 | LN310.931 | LN310.930 | LN310.931 | LN310.931 | LN310.931 | LN310.930 | LN310.931 | LN310.931 | LN310.931 |
| 303792.1  | 329466    | 78519.43  | 254701.1  | 450484.6  | 172262.5  | 98533.35  | 381560.1  | 292869.9  | 318905.3  |
| 331845    | 223600.7  | 67337.15  | 301876.7  | 276190.9  | 147016.5  | 110658.2  | 324086    | 306956.2  | 341442.5  |
| 393432.1  | 191360.1  | 65115.44  | 238310.9  | 288920.1  | 163237.5  | 99498     | 322749.3  | 311662.6  | 278651.4  |
| 277362.8  | 368653.1  | 58944.79  | 248071.6  | 291089.6  | 193550.6  | 107328.5  | 281742.1  | 302652.9  | 406639.6  |
| 356723.4  | 261867.4  | 62182.35  | 236448.3  | 259117.1  | 118659    | 74147.54  | 273285.3  | 299868.6  | 288328.2  |

|           |           |           |           |           |           |           |           |           |           |
|-----------|-----------|-----------|-----------|-----------|-----------|-----------|-----------|-----------|-----------|
| LN310.931 | LN310.931 | LN310.931 | LN310.930 | LN310.931 | LN310.931 | LN311.012 | LN311.013 | LN311.013 | LN311.013 |
| 229593.8  | 281998.2  | 280179.3  | 81313.53  | 149647.1  | 368924.1  | 42003.58  | 33220.33  | 22513.05  | 31771.63  |
| 294806.9  | 262061.9  | 317096.3  | 60143.95  | 189868    | 300612    | 45139.37  | 29866.35  | 26353.84  | 34650.34  |
| 310008.9  | 424184.2  | 279016.1  | 100268    | 196941.2  | 366195.9  | 38988.13  | 27663.5   | 25401.18  | 36982.87  |
| 294529.1  | 347250.6  | 242017.6  | 54059.84  | 197446.8  | 390740    | 46913.6   | 29502.05  | 23300.55  | 34405.31  |
| 257112.5  | 340649.3  | 339124.5  | 76918.84  | 189042.4  | 352996.6  | 40797.62  | 28737.61  | 25501.51  | 38003.02  |



|           |           |           |           |           |           |           |           |           |           |
|-----------|-----------|-----------|-----------|-----------|-----------|-----------|-----------|-----------|-----------|
| LN311.013 | LN311.295 | LN311.851 | LN311.861 | LN312.859 | LN312.991 | LN313.01_ | LN313.009 | LN313.009 | LN313.009 |
| 34321.65  | 13116.71  | 12416.4   | 13788.27  | 14718.32  | 43482.1   | 45065.04  | 45202.84  | 38975.06  | 52337.66  |
| 33302.17  | 15262.92  | 13400.34  | 10787.15  | 15043.36  | 45081.77  | 48198.5   | 43000.43  | 34786.34  | 50596.27  |
| 29613.88  | 15610.98  | 13260.7   | 10034.57  | 13549.45  | 40423.02  | 43720.55  | 41206.73  | 38879.98  | 51335.65  |
| 34059.99  | 13552.01  | 11994.27  | 14689.86  | 14458.42  | 43711.39  | 45949.75  | 47806.26  | 37162.76  | 54677.36  |
| 34327.12  | 13806.76  | 10844.36  | 17682.04  | 15944.23  | 44114.51  | 47959.64  | 46604     | 43000.96  | 57656.23  |

|           |           |           |           |           |           |           |           |           |           |
|-----------|-----------|-----------|-----------|-----------|-----------|-----------|-----------|-----------|-----------|
| LN313.010 | LN313.010 | LN313.009 | LN313.009 | LN313.010 | LN313.078 | LN313.078 | LN313.078 | LN313.078 | LN313.078 |
| 30508.57  | 37984.64  | 38080.16  | 44954.97  | 26188.14  | 35601.56  | 17103.75  | 18091.4   | 13566.96  | 12566.91  |
| 27378.66  | 37255.99  | 40600.79  | 42021.45  | 25393.53  | 46711.92  | 21992.53  | 23161.38  | 13066.34  | 12063.76  |
| 29571.01  | 35041.01  | 39829.62  | 47909.07  | 25766.04  | 65319.37  | 32814.81  | 29586.78  | 18623.44  | 12346.63  |
| 30237.3   | 34980.76  | 41256.6   | 45915.35  | 24906.64  | 75061.66  | 37852.72  | 35258.13  | 22337.51  | 14245.85  |
| 30831.79  | 40021.89  | 42046.08  | 47868.01  | 26526.25  | 76254.85  | 39277.09  | 38270.17  | 23379.15  | 16664.68  |

|           |           |           |           |           |           |           |           |           |           |
|-----------|-----------|-----------|-----------|-----------|-----------|-----------|-----------|-----------|-----------|
| LN313.078 | LN313.078 | LN313.191 | LN314.987 | LN314.987 | LN314.987 | LN314.987 | LN314.987 | LN314.987 | LN314.988 |
| 8874.382  | 20163.3   | 23805.29  | 24124.89  | 35281.96  | 40955.24  | 19805.89  | 31358.46  | 52077.37  | 43121.4   |
| 11142.22  | 24327.49  | 21789.43  | 26318.86  | 38717.74  | 42267.34  | 20930.89  | 32404.64  | 59742.02  | 49369.73  |
| 10143.28  | 33918.29  | 27095.03  | 25266.91  | 29895.65  | 43713.18  | 22717.41  | 33288.04  | 55322.55  | 48726.37  |
| 11120.86  | 38708.97  | 17694.42  | 25626.62  | 31473.92  | 42111.26  | 23995.74  | 31062.69  | 56540.3   | 41739.14  |
| 12773.2   | 38428.73  | 19582.52  | 23666.35  | 32692.79  | 41524.7   | 24944.36  | 27367.73  | 64306.49  | 41256.94  |

|           |           |           |           |           |           |           |           |           |           |
|-----------|-----------|-----------|-----------|-----------|-----------|-----------|-----------|-----------|-----------|
| LN314.988 | LN314.987 | LN314.988 | LN314.988 | LN314.988 | LN314.988 | LN314.988 | LN314.988 | LN314.987 | LN314.988 |
| 35956.23  | 57773.33  | 38924.04  | 35739.6   | 33198.64  | 33698.1   | 40540.68  | 31202.9   | 53168.83  | 29624.03  |
| 53326.96  | 47671.06  | 41392.85  | 32427.32  | 26894.99  | 41659.12  | 51661.39  | 38645.95  | 83358.4   | 26670.18  |
| 33978.81  | 46010.51  | 34124.7   | 33237.76  | 34104.13  | 39550.63  | 41367.09  | 34273.41  | 60101.92  | 27318.26  |
| 38778.76  | 48829.24  | 32430.23  | 37292.39  | 34455.73  | 35656.15  | 42224.64  | 36730.35  | 54425.61  | 27004.97  |
| 39337.29  | 55907.33  | 37926.2   | 49380.55  | 30392.08  | 49364.36  | 46869.08  | 29120.64  | 57983.8   | 28081.19  |

|           |           |           |           |           |           |           |           |           |           |
|-----------|-----------|-----------|-----------|-----------|-----------|-----------|-----------|-----------|-----------|
| LN314.988 | LN314.988 | LN314.988 | LN314.988 | LN314.988 | LN314.987 | LN314.988 | LN314.988 | LN314.988 | LN314.988 |
| 28540.18  | 26526.1   | 18454.47  | 30331.65  | 31573.02  | 48458.84  | 50527.55  | 32447.86  | 35124.96  | 27973.17  |
| 23191.62  | 33889.56  | 18616.7   | 41961.56  | 31915.18  | 55882.76  | 78134.34  | 26363.59  | 23076.43  | 40603.35  |
| 29400.77  | 24527.48  | 18574.92  | 35570.05  | 27488.29  | 52188.21  | 49858.62  | 29361.83  | 37036.28  | 27694.79  |
| 31879.01  | 24275.32  | 20662.39  | 34646.14  | 26271.69  | 50162.94  | 49155.38  | 29778.55  | 32863.44  | 26379.21  |
| 28183.81  | 22164.19  | 13203.64  | 40183.79  | 24318.63  | 52285.6   | 57033.64  | 31866.66  | 24784.75  | 20943.54  |

|           |           |           |           |           |           |           |           |           |           |
|-----------|-----------|-----------|-----------|-----------|-----------|-----------|-----------|-----------|-----------|
| LN314.988 | LN314.987 | LN314.988 |
| 31072.31  | 46988.46  | 32715.71  | 39431.11  | 22252.37  | 20668.9   | 27743.61  | 13640.37  | 17484.58  | 36518.03  |
| 27554.01  | 44851.36  | 28900.78  | 44036.32  | 23409.61  | 21686.3   | 27558.34  | 25797.56  | 19757.9   | 46144.92  |
| 26047.29  | 44749.98  | 32001.7   | 38875.61  | 23913.02  | 21136.15  | 28667.04  | 15901.17  | 15680.12  | 35327.08  |
| 31326.1   | 45066.19  | 31974.85  | 35692.01  | 23353.02  | 20806.23  | 25431.18  | 12241.63  | 15959.43  | 37295.74  |
| 26413.07  | 48025.87  | 50887.74  | 43813.24  | 29933.58  | 21598.91  | 31688.6   | 12933.99  | 13944.86  | 40535     |

|           |           |           |           |           |           |           |           |           |           |
|-----------|-----------|-----------|-----------|-----------|-----------|-----------|-----------|-----------|-----------|
| LN314.988 | LN314.988 | LN314.988 | LN314.987 | LN314.988 | LN314.988 | LN314.988 | LN314.987 | LN314.988 | LN314.988 |
| 13118.01  | 50867.47  | 27462.95  | 55809.74  | 22229.84  | 24941.06  | 31556.18  | 51255.4   | 33378.26  | 14079.63  |
| 12793.99  | 34113.11  | 23924.01  | 67633.08  | 12488.22  | 40082.94  | 35855.66  | 52058.19  | 53724.23  | 15044.23  |
| 16112.63  | 46019.9   | 30746.53  | 63455.57  | 22177.75  | 23382.36  | 31923.53  | 52520.96  | 36772.42  | 15205.91  |
| 13818.17  | 56096.7   | 29263.56  | 54454.24  | 21825.05  | 22636.75  | 27278.61  | 52262.53  | 31782.36  | 13978.65  |
| 12094.57  | 51902.07  | 25668.38  | 59989.6   | 16700.14  | 25353.08  | 35029.4   | 68723.43  | 53532.84  | 13782.56  |

|           |           |           |           |           |           |           |           |           |           |
|-----------|-----------|-----------|-----------|-----------|-----------|-----------|-----------|-----------|-----------|
| LN314.988 | LN314.988 | LN314.987 | LN314.988 | LN314.988 | LN314.987 | LN314.987 | LN314.988 | LN314.988 | LN314.988 |
| 19662.25  | 39187.16  | 39037.9   | 44163.57  | 35650.25  | 70687.12  | 57185.76  | 19203.7   | 14609.57  | 19366.26  |
| 14341.83  | 38577.18  | 54469.61  | 37369.77  | 44705.88  | 40088.71  | 92292.35  | 20746.62  | 15840     | 28165.25  |
| 16253.66  | 42779.48  | 42218.21  | 40644.36  | 34782.29  | 64381.08  | 55054.01  | 20386.82  | 13330.34  | 19701.23  |
| 17071.71  | 37697.77  | 35343.95  | 45084.16  | 33654.1   | 62556.36  | 52403.12  | 18305.04  | 12234.67  | 17409.71  |
| 12869.59  | 48656.02  | 32362.72  | 51131.46  | 38535.72  | 65649.15  | 53658.49  | 18676.98  | 12788.52  | 20218.04  |



|           |           |           |           |           |           |           |           |           |           |
|-----------|-----------|-----------|-----------|-----------|-----------|-----------|-----------|-----------|-----------|
| LN314.988 | LN314.988 | LN314.988 | LN314.988 | LN314.988 | LN314.988 | LN314.987 | LN314.988 | LN314.988 | LN314.988 |
| 22395.48  | 40839.04  | 45779.01  | 31046.24  | 32812.36  | 43013.69  | 41812.26  | 14658.95  | 30368.56  | 17698.28  |
| 19750.91  | 37719.9   | 62082.96  | 31920.56  | 42040.23  | 37635.17  | 61397.73  | 14553.91  | 30193.32  | 17638.04  |
| 17848.93  | 39578.42  | 44627.78  | 30653.46  | 37447.86  | 38629.69  | 44906.57  | 14478.57  | 29622.66  | 19150.58  |
| 19116.13  | 41777.04  | 46248.24  | 32568.49  | 36029.42  | 36867.92  | 44017.79  | 14397.99  | 31798.61  | 19189.48  |
| 26279.34  | 31692.65  | 43688.55  | 29340.03  | 37154.42  | 47576.16  | 46159.35  | 13963.21  | 38748.16  | 23988.67  |

|           |           |           |           |           |           |           |           |           |           |
|-----------|-----------|-----------|-----------|-----------|-----------|-----------|-----------|-----------|-----------|
| LN314.988 |
| 33099.32  | 50938.64  | 36153.28  | 34991.98  | 16908.05  | 36119.89  | 14240.39  | 31044.24  | 36643.46  | 20662.12  |
| 35928.06  | 44848.76  | 33905.29  | 29811.17  | 25996.36  | 48383.3   | 11927.18  | 42231.35  | 36835.63  | 16598.66  |
| 36249.24  | 45510.14  | 38588.47  | 32308.17  | 13494.44  | 36097.88  | 11135.05  | 29604.89  | 35469.38  | 17147.87  |
| 36107.93  | 47859.05  | 40948.07  | 30931.14  | 14147.85  | 31324.99  | 12492.68  | 32849.01  | 38054.33  | 16936.33  |
| 30990.1   | 36063.45  | 39973.55  | 31668.71  | 14755.91  | 41854.39  | 11925.11  | 35473.32  | 24887.83  | 17574.97  |

|           |           |           |           |           |           |           |           |           |           |
|-----------|-----------|-----------|-----------|-----------|-----------|-----------|-----------|-----------|-----------|
| LN314.988 | LN315.075 | LN315.075 |
| 32554.14  | 31563.9   | 37643.35  | 39098.88  | 35216.14  | 21979.35  | 32142.72  | 24305.99  | 20313.47  | 13957.57  |
| 47770.89  | 28512.89  | 35491.59  | 34246.69  | 43957.01  | 25327.44  | 25108.49  | 42438.8   | 19423.07  | 16897.89  |
| 31166.6   | 29559.56  | 35852.87  | 37550.49  | 38661.57  | 22865.4   | 32577.98  | 24473.06  | 19416.88  | 17237.17  |
| 29086.87  | 27882.54  | 36273.05  | 34842.48  | 32694.85  | 23717.61  | 33646.82  | 23183.64  | 19161.51  | 19063.32  |
| 30165.1   | 28013.59  | 30647.23  | 35043     | 38502.63  | 21177.58  | 28907.16  | 25652.58  | 20945.8   | 17813.34  |

|           |           |           |           |           |           |           |           |           |           |
|-----------|-----------|-----------|-----------|-----------|-----------|-----------|-----------|-----------|-----------|
| LN315.075 | LN315.180 | LN316.800 | LN316.869 | LN316.874 | LN316.874 | LN316.875 | LN316.875 | LN316.875 | LN316.874 |
| 16232.98  | 18379.18  | 35860.56  | 41803.89  | 246659    | 361689.2  | 91839.63  | 62445.61  | 85517.36  | 177394.4  |
| 17767.9   | 18090.39  | 35915.59  | 47321.84  | 245948.4  | 348397    | 80485.53  | 69285.19  | 78233.64  | 185122.4  |
| 15354.99  | 18838.95  | 39499.46  | 46647.18  | 251517.9  | 375687.9  | 83619.36  | 64830.67  | 86139.97  | 179622.3  |
| 16955.83  | 18673.39  | 41080.8   | 30773.63  | 306711.1  | 386013.6  | 85754.22  | 60859.56  | 73154.33  | 191979.3  |
| 17226.53  | 15980.46  | 49156.94  | 45921.24  | 42708.41  | 57205.67  | 75072.87  | 54011.56  | 74925.35  | 184179.5  |

|           |           |           |           |           |           |           |           |           |           |
|-----------|-----------|-----------|-----------|-----------|-----------|-----------|-----------|-----------|-----------|
| LN316.874 | LN316.875 | LN316.874 |
| 433401.3  | 274933    | 129618.1  | 130772    | 411832.8  | 383614    | 279774.2  | 348870.9  | 117729.6  | 285580.1  |
| 406892.9  | 253453    | 125479.2  | 122761.9  | 409025.8  | 409542.3  | 294054    | 329266.2  | 115816.6  | 267114.5  |
| 417009.2  | 264689.2  | 129668.4  | 124042.6  | 414667.5  | 404766.8  | 302914.3  | 362629.4  | 113357.7  | 292729.5  |
| 395745.4  | 261627.5  | 125890.4  | 110396.1  | 461023.7  | 404781.3  | 284680    | 360722.1  | 110798.8  | 271611.6  |
| 419462.1  | 265344.7  | 110283.3  | 117054.8  | 402811.6  | 399836    | 308600.8  | 361808.5  | 97405.1   | 274614    |

|           |           |           |           |           |           |           |           |           |           |
|-----------|-----------|-----------|-----------|-----------|-----------|-----------|-----------|-----------|-----------|
| LN316.874 | LN316.874 | LN316.874 | LN316.947 |
| 213632.6  | 86911.13  | 192376.1  | 707875.5  | 715649.3  | 820594.6  | 496284.4  | 250377    | 292606.1  | 265377.3  |
| 217215.7  | 87313.18  | 192750    | 1115238   | 668441.9  | 799881.1  | 440909.6  | 359064.3  | 299125    | 304966.3  |
| 216754.3  | 84074.23  | 181109    | 787489.8  | 705747    | 888985.6  | 460761.3  | 303635    | 270544    | 316774    |
| 220313.6  | 83713.08  | 200613.5  | 914531.6  | 675311.7  | 797997.9  | 442708.5  | 312704.5  | 385247.2  | 280444.4  |
| 213270.4  | 68565.19  | 200760.5  | 744954.5  | 660917.8  | 736849.8  | 544902.7  | 337777.5  | 386858.4  | 253134.9  |

|           |           |           |           |           |           |           |           |           |           |
|-----------|-----------|-----------|-----------|-----------|-----------|-----------|-----------|-----------|-----------|
| LN316.947 |
| 649183.3  | 563612.2  | 686708.2  | 349345.2  | 485028.2  | 674915.3  | 600705.9  | 508072.3  | 833197.5  | 850660.2  |
| 484874    | 495548.6  | 472458    | 318474.3  | 747193.6  | 583371.9  | 726014.3  | 373172.4  | 686391.1  | 576476.8  |
| 633750.8  | 585665.9  | 437125.6  | 314423    | 830235.5  | 625036.8  | 569223    | 375581.2  | 866601.2  | 512824.4  |
| 408364.3  | 473663.7  | 427617.9  | 375908.1  | 597348.7  | 806121.8  | 459397.7  | 422555.7  | 938983.3  | 670648.2  |
| 526410.2  | 435608.3  | 1039221   | 418283.4  | 507960.4  | 470000.4  | 833108.5  | 462550.5  | 681467.5  | 476063.6  |

|           |           |           |           |           |           |           |           |           |           |
|-----------|-----------|-----------|-----------|-----------|-----------|-----------|-----------|-----------|-----------|
| LN316.948 | LN316.947 |
| 357456.1  | 333785.9  | 814029    | 385684.9  | 808864    | 710778.1  | 748465.6  | 533954.3  | 698993.9  | 300359.6  |
| 446010.5  | 544233.3  | 833532.3  | 497201.7  | 741954.7  | 913235.9  | 578482.3  | 664712.3  | 660160.8  | 325841.7  |
| 294944.6  | 393578.7  | 747997.4  | 328695.4  | 818855.2  | 871850.6  | 560451.9  | 646273.4  | 607453.6  | 455081    |
| 255874.4  | 316223.3  | 857363.1  | 355323    | 671963.9  | 512299.6  | 601965.5  | 762161.3  | 573042.6  | 379245    |
| 427152.8  | 500548.9  | 908592.4  | 468130.2  | 572596.3  | 565450.1  | 428872.9  | 699635.6  | 706222.2  | 261575.6  |



|           |           |           |           |           |           |           |           |           |           |
|-----------|-----------|-----------|-----------|-----------|-----------|-----------|-----------|-----------|-----------|
| LN316.947 |
| 604354    | 541139.7  | 636650.5  | 337090.8  | 807170.6  | 464314.3  | 745931.3  | 382760.8  | 606034.7  | 183533.4  |
| 513258.1  | 353691    | 524263.1  | 464021    | 769651.4  | 371535.6  | 629715.3  | 459441.8  | 570398.8  | 150746    |
| 885439.7  | 542402.9  | 680667.4  | 385011.8  | 1034829   | 432743    | 502817.9  | 379559.6  | 587948.4  | 214416.2  |
| 664055.2  | 558685    | 562976.9  | 425919.6  | 539674.8  | 531195.9  | 834993.6  | 406429.9  | 852310.7  | 291765.3  |
| 614360.6  | 559596.8  | 656567.6  | 315128.8  | 825901.8  | 391843.3  | 821968.9  | 449093.4  | 809649.5  | 206549.6  |

|           |           |           |           |           |           |           |           |           |           |
|-----------|-----------|-----------|-----------|-----------|-----------|-----------|-----------|-----------|-----------|
| LN316.947 |
| 414516.7  | 302888.3  | 349053.1  | 621530.3  | 636631.8  | 270616    | 558262.4  | 725866.5  | 566555.4  | 209108.1  |
| 429743.3  | 524917.2  | 400802.6  | 534623.3  | 418574.5  | 386030.7  | 499879.8  | 880978.4  | 546021.8  | 133096.1  |
| 420840.5  | 406009    | 298633.4  | 554707.1  | 457095.2  | 272493.3  | 515751.5  | 809594.6  | 437721.2  | 134351.4  |
| 524883.1  | 512088.7  | 472803.9  | 570091.2  | 481693.1  | 242682.8  | 422824.1  | 705841.4  | 547918.7  | 172465.1  |
| 550096.4  | 397153.5  | 328898.8  | 592453.2  | 394319.6  | 276253.3  | 564450.1  | 754331.4  | 504739    | 142233.7  |

|           |           |           |           |           |           |           |           |           |           |
|-----------|-----------|-----------|-----------|-----------|-----------|-----------|-----------|-----------|-----------|
| LN316.947 | LN316.947 | LN316.947 | LN316.948 | LN316.947 | LN316.947 | LN316.947 | LN316.947 | LN316.947 | LN316.947 |
| 425775.4  | 399942.2  | 790904.2  | 397285.2  | 604378.3  | 665336    | 525283.8  | 497551.6  | 579520.4  | 545958.5  |
| 467554.4  | 451857.5  | 515664.5  | 393313.9  | 737320.3  | 708607.4  | 575909.8  | 709907.1  | 692492.4  | 554189.9  |
| 433785.7  | 663861.4  | 501672.3  | 375347.7  | 682240.3  | 667292.7  | 595373.8  | 644130.1  | 557113.7  | 501283    |
| 483727    | 391531.1  | 544018.3  | 359422.8  | 705917.1  | 1042618   | 612163.4  | 512921.8  | 633266.6  | 577008.2  |
| 417186.4  | 479953.5  | 507290.4  | 328407.1  | 701485.3  | 469072    | 639651.8  | 789802.7  | 536858.3  | 904870.4  |

|           |           |           |           |           |           |           |           |           |           |
|-----------|-----------|-----------|-----------|-----------|-----------|-----------|-----------|-----------|-----------|
| LN316.947 | LN316.947 | LN316.947 | LN316.948 | LN316.948 | LN316.948 | LN316.947 | LN316.947 | LN316.948 | LN316.947 |
| 637097    | 656667.4  | 282192.7  | 149452.8  | 121196.1  | 78637.33  | 285615.6  | 250455.5  | 119615.2  | 862630.2  |
| 616284.7  | 635031.1  | 290441.7  | 179102.2  | 84627.69  | 79807.76  | 430506.4  | 377401.8  | 121428.1  | 670146    |
| 697285.7  | 675681.6  | 322423.4  | 114234.8  | 103133.4  | 87498.7   | 344652.1  | 331469.6  | 87768.09  | 656957.6  |
| 786913.8  | 589314.8  | 293252.4  | 175121.1  | 126419.3  | 56047.17  | 370866    | 344958.2  | 83129.29  | 690485.1  |
| 764583.2  | 703924.9  | 327628.3  | 95951.16  | 86834.62  | 40085.98  | 404149.1  | 283497    | 107425.1  | 625892.2  |

|           |           |           |           |           |           |           |           |           |           |
|-----------|-----------|-----------|-----------|-----------|-----------|-----------|-----------|-----------|-----------|
| LN316.947 | LN316.947 | LN316.948 | LN316.948 | LN316.947 | LN316.947 | LN316.947 | LN316.947 | LN316.947 | LN316.947 |
| 431937.2  | 714333.5  | 117197.9  | 102586.5  | 246551.3  | 442386.6  | 301832.9  | 511727.4  | 418740.5  | 402094.7  |
| 439319.6  | 734690.9  | 195141.2  | 144295    | 324396.2  | 503037.7  | 223337.2  | 340826.3  | 555355.1  | 330379.5  |
| 342969.3  | 775186.6  | 87157.89  | 104806.9  | 221827.9  | 398794    | 211648.8  | 433556.9  | 441416.1  | 309594.3  |
| 366184.4  | 615276.4  | 158411.9  | 137383    | 323754    | 368055.9  | 199420.1  | 414689.3  | 568416.1  | 326269.7  |
| 341400.6  | 778498.3  | 144335.2  | 110335.1  | 234868.3  | 383763.1  | 172282.7  | 451582.7  | 772666.4  | 504355.9  |

|           |           |           |           |           |           |           |           |           |           |
|-----------|-----------|-----------|-----------|-----------|-----------|-----------|-----------|-----------|-----------|
| LN316.948 | LN316.947 | LN316.948 | LN316.948 | LN316.985 | LN317.160 | LN317.160 | LN317.160 | LN317.160 | LN317.160 |
| 65615.88  | 431176.8  | 497134.5  | 594684.8  | 35331.75  | 33553.62  | 25708.27  | 34298.07  | 28883.39  | 35272.45  |
| 90133.19  | 365243.5  | 555453.8  | 578796.8  | 31652.42  | 28619.9   | 29569.96  | 32676.85  | 29726.82  | 27954.5   |
| 102412.4  | 545652.8  | 488759    | 599626.5  | 33713.2   | 38486.47  | 34109.72  | 48949.92  | 36684.81  | 31256.91  |
| 80526.86  | 476760.3  | 498883.7  | 580063    | 31191.55  | 28609.13  | 26835.59  | 29911.65  | 34608.56  | 28405.63  |
| 83305.98  | 419462.1  | 577671.9  | 585637.1  | 34294.35  | 27140.86  | 27483.74  | 30615.8   | 31750.17  | 27033.99  |

|           |           |           |           |           |           |           |           |           |           |
|-----------|-----------|-----------|-----------|-----------|-----------|-----------|-----------|-----------|-----------|
| LN317.160 |
| 34875.61  | 29334.88  | 34276.13  | 53599.99  | 16409.84  | 18419.04  | 21303.94  | 29113.22  | 28120.09  | 37109.65  |
| 39917.2   | 30612.28  | 25530.79  | 46889.17  | 20613.9   | 12640.13  | 27179.61  | 37650.79  | 24137.64  | 41291.39  |
| 43722.59  | 23740.15  | 38353.43  | 48741.69  | 18871.92  | 17403.26  | 31233.93  | 37634.47  | 32302.94  | 34281.79  |
| 38171.29  | 30725.35  | 22985.48  | 48267.6   | 15713.94  | 17726.77  | 23478.09  | 36342.35  | 27644.96  | 40444.81  |
| 39612.06  | 32505.04  | 21535.72  | 52591.16  | 15390.66  | 13741.06  | 22902.01  | 36820.94  | 25421.61  | 40537.53  |

|           |           |           |           |           |           |           |           |           |           |
|-----------|-----------|-----------|-----------|-----------|-----------|-----------|-----------|-----------|-----------|
| LN317.160 |
| 15742.79  | 42639.93  | 45168.02  | 41608.99  | 47726.63  | 40940.9   | 51626.99  | 43972.52  | 45523.64  | 37518.1   |
| 20035.97  | 39406.16  | 41395.25  | 32609.76  | 35448.59  | 21687.18  | 45224.2   | 51983.57  | 41587.76  | 42977.18  |
| 23169.78  | 42188.01  | 33658.92  | 39085.77  | 32226.07  | 28875.07  | 42221.35  | 48778.94  | 45937.28  | 58875.58  |
| 17661.2   | 38529.63  | 43484.59  | 32101.69  | 34295.42  | 28213.84  | 48298.64  | 51986.58  | 40659.61  | 42496.32  |
| 17281.61  | 40115.85  | 43497.72  | 38958.36  | 37518.96  | 23194.14  | 49553.92  | 50309.82  | 40947.41  | 36496.69  |



|           |           |           |           |           |           |           |           |           |           |
|-----------|-----------|-----------|-----------|-----------|-----------|-----------|-----------|-----------|-----------|
| LN317.160 |
| 41177.65  | 36232.64  | 39998.97  | 30005.26  | 23124.58  | 30803.77  | 30234.05  | 27594.58  | 29586.09  | 26868.43  |
| 44106.14  | 24427.88  | 31586.28  | 25492.28  | 27433.83  | 40069.31  | 31436.82  | 30024.13  | 36698.87  | 28741.51  |
| 51170.6   | 19427.61  | 31567.28  | 32164.06  | 26493.34  | 49025.77  | 34382.12  | 30355.8   | 40042.29  | 34660.38  |
| 39546.01  | 20189.85  | 35144.38  | 22266.32  | 24917.82  | 32457.32  | 29200.4   | 31487.25  | 32772.13  | 24498.3   |
| 36317.18  | 22031.28  | 33028.37  | 24435.37  | 27659.68  | 30782.68  | 34193.34  | 27579.64  | 34528.79  | 26116.86  |

|           |           |           |           |           |           |           |           |           |           |
|-----------|-----------|-----------|-----------|-----------|-----------|-----------|-----------|-----------|-----------|
| LN317.160 |
| 33386.03  | 71786.22  | 43776.88  | 33245.63  | 19491.76  | 15573.98  | 33791.84  | 52497.71  | 18066.8   | 22806.17  |
| 34906.04  | 59264.79  | 26697.88  | 37239.19  | 18349.61  | 13309.68  | 37641.42  | 36461.85  | 23317.57  | 21928.28  |
| 41084.94  | 49742.74  | 35234.46  | 37594.16  | 18419.59  | 14260.63  | 48047.58  | 43205.91  | 29243.43  | 17940.93  |
| 29345.4   | 54421     | 27005.1   | 34624.86  | 18088.08  | 14156.89  | 37878.26  | 35432.18  | 20782.85  | 17561.94  |
| 31634.14  | 57238.63  | 28780.33  | 35910.54  | 16764.34  | 14888.63  | 38077.44  | 34073.61  | 21113.02  | 17486.56  |

|           |           |           |           |           |           |           |           |           |           |
|-----------|-----------|-----------|-----------|-----------|-----------|-----------|-----------|-----------|-----------|
| LN317.160 |
| 55865.22  | 43018.41  | 31856.01  | 19480.4   | 40298.43  | 41114.3   | 45821.1   | 29277.28  | 34204.23  | 30198.82  |
| 56759.85  | 49915.37  | 30606.6   | 20093.72  | 35894.72  | 46655.12  | 45950.89  | 30088.04  | 43576.6   | 27404.01  |
| 52989.65  | 48666.39  | 28331.02  | 24134.09  | 40089.51  | 38706.03  | 49822.47  | 26226.44  | 67962.61  | 26857.6   |
| 57435.04  | 49840.28  | 24922.98  | 20324.29  | 34351.59  | 44247.95  | 43242.23  | 31206.25  | 38009.32  | 25991.76  |
| 53966.35  | 45378.04  | 25975     | 17547.99  | 32784.45  | 43298.69  | 39059.26  | 26250.44  | 40577.68  | 28233.19  |

|           |           |           |           |           |           |           |           |           |           |
|-----------|-----------|-----------|-----------|-----------|-----------|-----------|-----------|-----------|-----------|
| LN317.160 |
| 20633.42  | 36952.43  | 43753.88  | 33106.33  | 62191.09  | 22215.16  | 28316.26  | 22456.26  | 39305.14  | 44638.66  |
| 15912.2   | 31260.87  | 36137.13  | 32254.68  | 46529.06  | 23450.95  | 30121.96  | 22968.83  | 34531.89  | 43275.46  |
| 15359.62  | 22256.73  | 31801.37  | 27805.77  | 43876.86  | 30013.9   | 47561.96  | 22720.66  | 38248.46  | 45572.45  |
| 19337.01  | 27704.69  | 32546.96  | 31591.64  | 42762.1   | 25064.59  | 30067.29  | 22644.49  | 36086.78  | 47065.94  |
| 16087.57  | 30087.35  | 34013.81  | 31733.39  | 49473.11  | 25533.94  | 26736.85  | 24489.27  | 33010.92  | 43746.94  |

|           |           |           |           |           |           |           |           |           |           |
|-----------|-----------|-----------|-----------|-----------|-----------|-----------|-----------|-----------|-----------|
| LN317.160 |
| 39488.24  | 45207.6   | 29004.74  | 39904.93  | 27785.92  | 30780.86  | 41392.16  | 18281.96  | 32081.14  | 43014.6   |
| 61652.28  | 47310.98  | 42645.38  | 44012.36  | 28461.86  | 32831.06  | 35312.13  | 18493.23  | 32225.97  | 40151.24  |
| 68189.34  | 53504.85  | 51830.2   | 40003.49  | 44486.87  | 38032.18  | 36924.18  | 14111.43  | 27822.04  | 40191.62  |
| 57812.22  | 45129.37  | 40024.33  | 41505.33  | 26866.37  | 33336.88  | 36097.32  | 16352.36  | 30433.14  | 39722.09  |
| 64198.56  | 47095.72  | 39189.7   | 42112.81  | 26370.19  | 32617.18  | 32610.07  | 19009.62  | 29571.53  | 38340.68  |

|           |           |           |           |           |           |           |           |           |           |
|-----------|-----------|-----------|-----------|-----------|-----------|-----------|-----------|-----------|-----------|
| LN317.160 |
| 42143.3   | 34089.19  | 50506.39  | 41706.43  | 23720.04  | 43867.82  | 49652.83  | 24396.11  | 40777.56  | 25144.24  |
| 48978.14  | 36180.89  | 31637.34  | 39821.62  | 23302.55  | 41239.6   | 48091.75  | 26417.67  | 31342.79  | 26380.01  |
| 35515.25  | 47098.74  | 36245.68  | 57083.37  | 25818.89  | 41877.68  | 47127.41  | 25304.35  | 35091.53  | 28692.64  |
| 42175.07  | 36345.36  | 33444.41  | 39392.05  | 22885.72  | 42518.74  | 42633     | 24650.32  | 30795.54  | 30084.43  |
| 45976.72  | 33928.45  | 34525.47  | 40499.47  | 24093.06  | 38810.98  | 44241.07  | 24067.11  | 31059.93  | 25962.85  |

|           |           |           |           |           |           |           |           |           |           |
|-----------|-----------|-----------|-----------|-----------|-----------|-----------|-----------|-----------|-----------|
| LN317.951 |
| 21567.73  | 35903.81  | 28654.87  | 35153.27  | 32133.64  | 27206.59  | 18756.23  | 42138.35  | 32530.05  | 31151.51  |
| 19918.47  | 39481.47  | 30658.96  | 33765.02  | 30812.57  | 29451.47  | 17731.05  | 41538.59  | 32033.96  | 26991.61  |
| 23412.44  | 37446.91  | 30292.06  | 33296.43  | 30249.14  | 24918.31  | 16365.53  | 40184.31  | 33053.13  | 27661.35  |
| 20480.8   | 35599.16  | 28890.61  | 33410.62  | 26452.55  | 25592.66  | 19123.87  | 45286.2   | 31863.17  | 30028.06  |
| 20087.6   | 36580.02  | 31377.56  | 33913.78  | 28539.29  | 26810.62  | 16064.06  | 43928.51  | 30382.87  | 25678.45  |

|           |           |           |           |           |           |           |           |           |           |
|-----------|-----------|-----------|-----------|-----------|-----------|-----------|-----------|-----------|-----------|
| LN317.951 |
| 37904.94  | 31242.04  | 23122.34  | 41573.74  | 36773.47  | 24885.01  | 21772.68  | 36173.66  | 24333.7   | 40474.68  |
| 39433.3   | 30445.09  | 25120.44  | 43363.24  | 37508.03  | 26352.26  | 22411.62  | 35227.52  | 28793.45  | 40208.73  |
| 38484.46  | 33249.74  | 21799.57  | 41935.02  | 39169.09  | 26756.04  | 20929.26  | 40618.29  | 29053.33  | 40029.53  |
| 36010.23  | 31015.71  | 20500.79  | 38696.11  | 40223.83  | 29804.79  | 23478.76  | 38639.15  | 25087.85  | 41117.64  |
| 37984.53  | 31841.89  | 20193.72  | 40839.84  | 40642.97  | 27871.24  | 22288.72  | 35834.72  | 25377.22  | 43377.53  |



|           |           |           |           |           |           |           |           |           |           |
|-----------|-----------|-----------|-----------|-----------|-----------|-----------|-----------|-----------|-----------|
| LN317.951 |
| 39024.36  | 44462.23  | 26014.31  | 41698.47  | 32581.56  | 36554.6   | 33960.87  | 50163.52  | 42241.33  | 27831.24  |
| 35750.16  | 50268.74  | 27951.2   | 42776.03  | 33526.71  | 40456.6   | 34627.38  | 47082.66  | 41739.54  | 29661.26  |
| 37370.68  | 46944.66  | 27855.83  | 39752.21  | 31886.94  | 36744.96  | 31855.27  | 49511.39  | 42390.63  | 31074.13  |
| 35791.63  | 46154.21  | 24963.24  | 42182.8   | 35700.25  | 35766.08  | 30499.55  | 48702.84  | 41537.51  | 26453.63  |
| 31814.09  | 40649.72  | 26056.39  | 35844.23  | 33513.77  | 35351.53  | 31569.21  | 47837     | 42096.06  | 27083.27  |

|           |           |           |           |           |           |           |           |           |           |
|-----------|-----------|-----------|-----------|-----------|-----------|-----------|-----------|-----------|-----------|
| LN317.951 |
| 32652.17  | 33990.61  | 42719.74  | 35849.91  | 37237.97  | 34329.16  | 46329.66  | 55163.73  | 42552.51  | 36356.96  |
| 37392.28  | 34437.1   | 46063.77  | 35501.44  | 41650.68  | 37791.24  | 50304.83  | 58147.06  | 46468.24  | 33081.33  |
| 35033.18  | 33942.6   | 41196.58  | 36503.01  | 38340.89  | 33676.33  | 49003.53  | 53341.93  | 43277.93  | 37158.04  |
| 36084.7   | 35993.79  | 40871.75  | 33478.07  | 38413.54  | 35166.73  | 46583.7   | 53781.55  | 44777.81  | 35528.4   |
| 33962.97  | 30438.51  | 43968.92  | 32552.24  | 36856.73  | 33768.11  | 48884.15  | 49178.93  | 42387.17  | 37271.31  |

|           |           |           |           |           |           |           |           |           |           |
|-----------|-----------|-----------|-----------|-----------|-----------|-----------|-----------|-----------|-----------|
| LN317.951 | LN318.483 | LN318.797 | LN318.872 | LN318.872 | LN318.873 | LN318.890 | LN318.891 | LN318.891 | LN318.981 |
| 38613.49  | 374746.3  | 18526.97  | 11842.78  | 12380.14  | 15930.84  | 21056.3   | 17028.56  | 13361.06  | 53032.98  |
| 38410.32  | 383401.6  | 18562.36  | 13529.63  | 10837.5   | 17023.45  | 17779.21  | 17273.64  | 13458.74  | 71925.98  |
| 40835.78  | 366825.2  | 23655.44  | 10455.8   | 13770.96  | 17026.61  | 21211.62  | 15401.15  | 12388.08  | 41745.74  |
| 40218.81  | 327889    | 25956.97  | 12639.98  | 12248.55  | 15623.15  | 23125.03  | 14931.24  | 13111.2   | 68860.74  |
| 35632.38  | 323438.2  | 30601.01  | 13299.53  | 12262.83  | 16816.25  | 22971.34  | 16202.35  | 12841.68  | 61172.67  |

|           |           |           |           |           |           |           |           |           |           |
|-----------|-----------|-----------|-----------|-----------|-----------|-----------|-----------|-----------|-----------|
| LN318.982 |
| 17714.67  | 47886.54  | 42218.2   | 23577.03  | 55787.56  | 58268.32  | 86039.75  | 36083.94  | 55617.83  | 27318.25  |
| 17040.65  | 59206.91  | 44599.38  | 28913.14  | 44203.55  | 78814.44  | 73691.67  | 48630.09  | 61022.49  | 38812.55  |
| 15549.59  | 81456.7   | 40942.61  | 24500.97  | 39000.15  | 64995.44  | 66707.43  | 30719.82  | 65344.16  | 49371.23  |
| 25567.94  | 53588.46  | 57251.58  | 40966.3   | 58978.22  | 64699.39  | 81682.35  | 34371.85  | 51681.31  | 39662.67  |
| 14509.49  | 37638.62  | 53730.8   | 20912.39  | 40152.73  | 69140.97  | 71884.81  | 46004.53  | 71294.08  | 28877.32  |

|           |           |           |           |           |           |           |           |           |           |
|-----------|-----------|-----------|-----------|-----------|-----------|-----------|-----------|-----------|-----------|
| LN318.982 |
| 59322.4   | 28648.06  | 60646.23  | 46060.6   | 61731.28  | 16664.44  | 60869.26  | 60317.35  | 41150.91  | 41868.8   |
| 87922.56  | 29991.95  | 67538.78  | 35343.15  | 64871.2   | 20932.92  | 39185.34  | 47533.03  | 61540.25  | 25304.56  |
| 51282.23  | 29679.11  | 66339.49  | 28080.72  | 59294.64  | 19769.83  | 42674.53  | 43887.89  | 47827.76  | 32330.14  |
| 77707.21  | 35372.37  | 68424.1   | 27614.9   | 121003.1  | 15572.29  | 52144.75  | 54846.08  | 34303.33  | 30566.22  |
| 56381.87  | 31702.87  | 58557.52  | 27435.44  | 64314     | 20690.9   | 54400.01  | 55051.71  | 30536.95  | 45312.46  |

|           |           |           |           |           |           |           |           |           |           |
|-----------|-----------|-----------|-----------|-----------|-----------|-----------|-----------|-----------|-----------|
| LN318.982 | LN318.981 | LN318.982 |
| 27920.28  | 89185.56  | 63866.98  | 38367.96  | 78225.45  | 81967.64  | 72126.24  | 62465.75  | 54770.54  | 39393.92  |
| 46644.65  | 111167.3  | 39306.72  | 31365.79  | 65187.27  | 63498.31  | 77993.9   | 57523.05  | 46962.62  | 35392.68  |
| 49079.51  | 104308.6  | 42188.63  | 47112.63  | 69730.6   | 77271.66  | 94343.84  | 54245.1   | 55689.22  | 31802.39  |
| 40285.18  | 102267.6  | 61885.57  | 33879.61  | 69297.77  | 83952.35  | 91944.12  | 62600.56  | 62842.47  | 43918.26  |
| 27763     | 78321.35  | 47742.15  | 43056.18  | 70456.31  | 71224.2   | 97378.67  | 55744.31  | 55048.52  | 40612.6   |

|           |           |           |           |           |           |           |           |           |           |
|-----------|-----------|-----------|-----------|-----------|-----------|-----------|-----------|-----------|-----------|
| LN318.982 |
| 37428.11  | 54415.38  | 70456.05  | 31831.02  | 46740.42  | 55222.47  | 51111.87  | 16556.73  | 40397.06  | 22168.21  |
| 32661.88  | 50643.32  | 77483.7   | 37840.8   | 62507.46  | 49590.15  | 54818.21  | 17756.55  | 26833.51  | 19484.55  |
| 45857.32  | 51792.24  | 72526.45  | 38129.5   | 48448     | 94877.87  | 55777.39  | 20931     | 26167.03  | 16711.96  |
| 37086.2   | 47727.91  | 76171.24  | 28942.37  | 48825.28  | 45271.93  | 68528.43  | 21160.2   | 26190.69  | 20297.13  |
| 47410.21  | 53822.29  | 63707.09  | 28651.11  | 30666.28  | 70411.48  | 59692.05  | 18260.75  | 30440.57  | 18494.06  |

|           |           |           |           |           |           |           |           |           |           |
|-----------|-----------|-----------|-----------|-----------|-----------|-----------|-----------|-----------|-----------|
| LN318.982 |
| 32107.51  | 58879.59  | 35112.88  | 86744.58  | 59218.52  | 24699.75  | 68455.35  | 49888.51  | 85747.53  | 22562.06  |
| 36430.33  | 88962.42  | 34784.81  | 52755.69  | 51335.4   | 53590.94  | 70795.95  | 41550.42  | 62608.27  | 20257.49  |
| 39345.63  | 71394.33  | 38589.11  | 64021.42  | 64219.33  | 25196.91  | 92689     | 48825.23  | 56477.23  | 19465.94  |
| 39002.57  | 63363.55  | 41144.61  | 60244.02  | 54829.88  | 24749.63  | 62319.74  | 40814.2   | 68890.6   | 26837.03  |
| 37244.26  | 59367.87  | 37450.4   | 58041.98  | 74522.02  | 27373.99  | 75786.97  | 42323.24  | 58666.08  | 23382.73  |



|           |           |           |           |           |           |           |           |           |           |
|-----------|-----------|-----------|-----------|-----------|-----------|-----------|-----------|-----------|-----------|
| LN318.982 |
| 38448.92  | 40796.04  | 21723.44  | 38888.45  | 53073.56  | 51302.7   | 39173.48  | 55531.37  | 42549.74  | 55693.57  |
| 58155.69  | 35663.32  | 17809.28  | 29503.06  | 40213.83  | 33461.51  | 32944.35  | 39264.46  | 38971.79  | 83452.46  |
| 56101.4   | 34369.55  | 16131.21  | 38271.18  | 51961.39  | 39014.9   | 30425.21  | 50581.46  | 51467.09  | 63599.28  |
| 63124.45  | 27404.87  | 14505.19  | 37879.28  | 56398.63  | 45135.35  | 34955.73  | 36678.19  | 41896.26  | 58579.36  |
| 48936.24  | 42195.7   | 21219.34  | 38744.77  | 68855.29  | 42996.71  | 31402.81  | 38793.55  | 45769.03  | 82854.54  |

|           |           |           |           |           |           |           |           |           |           |
|-----------|-----------|-----------|-----------|-----------|-----------|-----------|-----------|-----------|-----------|
| LN318.982 |
| 51208.32  | 65111.89  | 36009.38  | 33286.5   | 36796.64  | 74503.9   | 53940.29  | 40891.18  | 48708.01  | 90390.81  |
| 51765.99  | 53408.74  | 41648.83  | 28437.07  | 35206.45  | 88704.06  | 38781.4   | 43978.22  | 57493.79  | 115016.8  |
| 41886.25  | 57359.13  | 36845.31  | 34095.65  | 32798.39  | 81318.64  | 39642.04  | 50377.25  | 37021.89  | 106822.4  |
| 70964.73  | 59808.95  | 37536.66  | 32288.03  | 43106.11  | 79820.17  | 43408.43  | 39244.96  | 47516     | 101590.9  |
| 38140.75  | 75987.6   | 34535.06  | 30758.59  | 33045.94  | 105825    | 45917.76  | 45090.71  | 54325.78  | 97966.11  |

|           |           |           |           |           |           |           |           |           |           |
|-----------|-----------|-----------|-----------|-----------|-----------|-----------|-----------|-----------|-----------|
| LN318.982 |
| 45545.03  | 34086.66  | 36647.83  | 71215.11  | 53953.3   | 24414.96  | 46573.78  | 47952.52  | 55369.11  | 59523.07  |
| 36493.21  | 37987.42  | 49005.22  | 47903.28  | 56896.74  | 23462.19  | 55001.09  | 43191.53  | 36839.16  | 64761.43  |
| 43084.67  | 36661.03  | 49302.16  | 57125.88  | 56330.31  | 21729.94  | 58288.7   | 48937.59  | 51947.62  | 64556.27  |
| 39003.12  | 43648.47  | 35387.08  | 66703.04  | 64078.03  | 25043.04  | 51530.08  | 47844     | 71979.09  | 49588.4   |
| 41224.88  | 30183.89  | 37298.27  | 68645.64  | 58922.34  | 25977.47  | 60115.76  | 57630.53  | 46808.61  | 66461.59  |

|           |           |           |           |           |           |           |           |           |           |
|-----------|-----------|-----------|-----------|-----------|-----------|-----------|-----------|-----------|-----------|
| LN318.982 | LN318.982 | LN318.982 | LN318.982 | LN319.175 | LN319.175 | LN319.175 | LN319.856 | LN319.876 | LN319.889 |
| 23644.35  | 32125.5   | 22532.91  | 34227.38  | 17189.02  | 21866.2   | 24655.38  | 23758.62  | 26112.49  | 19888.86  |
| 24358.68  | 33725.65  | 23381.16  | 53131.24  | 16142.71  | 18776.07  | 21662.83  | 25202.78  | 15136.52  | 15252.13  |
| 24663.81  | 19128.81  | 27325.96  | 44124.7   | 17169.98  | 21106.09  | 24901.63  | 22491.99  | 16678.79  | 15604.8   |
| 23216.69  | 20169.99  | 21153.31  | 36475.67  | 13533.2   | 23465.85  | 23085     | 21428.79  | 23467.97  | 18931.22  |
| 27164.68  | 21062.44  | 21797.98  | 34111.24  | 13979.54  | 20997.49  | 24985.89  | 18337.98  | 21771.94  | 17517.9   |

|           |           |           |           |           |           |           |           |           |           |
|-----------|-----------|-----------|-----------|-----------|-----------|-----------|-----------|-----------|-----------|
| LN320.885 | LN320.977 | LN320.978 | LN320.997 |
| 541459.7  | 84158.43  | 38560.34  | 53420.95  | 34845.58  | 74063.22  | 68349.58  | 61099.58  | 43289.21  | 36135.34  |
| 352647.6  | 83160.95  | 40472.65  | 51526.77  | 33885.25  | 72899     | 65711.58  | 54753.73  | 52503.8   | 34612.54  |
| 583650.4  | 88730.65  | 41274.92  | 57401.78  | 39604.52  | 80124.95  | 64836.53  | 62832.3   | 51054.1   | 40009.49  |
| 401673.4  | 89265.08  | 47243.95  | 51821.46  | 37432.47  | 68687.17  | 70988.1   | 57694.92  | 57485.08  | 34056.39  |
| 611502.6  | 89578.3   | 39781.97  | 57787     | 41314.69  | 72020.55  | 74461.87  | 64742.99  | 53681.3   | 38355.73  |

|           |           |           |           |           |           |           |           |           |           |
|-----------|-----------|-----------|-----------|-----------|-----------|-----------|-----------|-----------|-----------|
| LN320.998 | LN320.997 | LN320.997 |
| 47408.36  | 25837.97  | 33161.26  | 40491.34  | 41180.9   | 41653.62  | 28472.73  | 27723.84  | 53084.25  | 66861.06  |
| 51085.33  | 27555.99  | 26599.37  | 41331.36  | 43167.96  | 40690.76  | 28378.3   | 24549.75  | 53653.1   | 69607.85  |
| 50509.81  | 27716.27  | 31142.16  | 47351.53  | 44824.53  | 42812.49  | 28748.86  | 28722.03  | 51948.96  | 60412.93  |
| 52213.26  | 30393.92  | 29485.22  | 42871.32  | 43989.62  | 43669.64  | 26279.86  | 29466.42  | 52937.9   | 61728.32  |
| 43855.96  | 29465.76  | 25912.64  | 45606.26  | 40888.79  | 38983.75  | 25630.51  | 26006.18  | 51216.49  | 66403.1   |

|           |           |           |           |           |           |           |           |           |           |
|-----------|-----------|-----------|-----------|-----------|-----------|-----------|-----------|-----------|-----------|
| LN320.998 |
| 31226.26  | 29711.48  | 38822.23  | 11355.37  | 34238.72  | 30864.41  | 34169.25  | 34908.5   | 26148.99  | 43527.84  |
| 32414.77  | 29597.83  | 41243.88  | 13711.37  | 31119.5   | 28365.66  | 36494.04  | 32831.44  | 25709.01  | 42682.24  |
| 32210.31  | 30569.06  | 42299.44  | 13457.18  | 32723.57  | 31951.37  | 33567.5   | 37326.04  | 27739.19  | 41602.17  |
| 33004.66  | 30844.52  | 42244.85  | 13594.29  | 33321.67  | 28443.11  | 37195.01  | 35246.99  | 26255.95  | 42070.49  |
| 32641.58  | 32459.39  | 45286.54  | 12825.04  | 29723.71  | 32430.62  | 35914.61  | 33182.63  | 31735.37  | 41558.98  |

|           |           |           |           |           |           |           |           |           |           |
|-----------|-----------|-----------|-----------|-----------|-----------|-----------|-----------|-----------|-----------|
| LN320.998 | LN320.997 | LN320.998 |
| 26853.49  | 37118.58  | 23049.08  | 33627.76  | 20120.88  | 26391.12  | 27997.81  | 23486.44  | 29223.52  | 61499.24  |
| 25932.69  | 40787.89  | 24897.51  | 37010.5   | 20992.48  | 25086.23  | 31458.79  | 22847.93  | 26229.71  | 67711.93  |
| 27576.45  | 36340.13  | 24502.23  | 35497.46  | 19971.09  | 27310.98  | 27663.2   | 24179.22  | 29388.21  | 67495.23  |
| 25315.25  | 37872.06  | 21071.75  | 38911.83  | 20271.76  | 24668.34  | 28120.04  | 24121.53  | 28300.85  | 70858.55  |
| 28625.12  | 41516.64  | 26876.96  | 33260.12  | 21970.8   | 26490.48  | 29581.96  | 21539.22  | 26824.92  | 63497.88  |



|           |           |           |           |           |           |           |           |           |           |
|-----------|-----------|-----------|-----------|-----------|-----------|-----------|-----------|-----------|-----------|
| LN320.998 | LN320.997 | LN320.998 | LN320.998 |
| 30296.99  | 37739.21  | 38660.42  | 42022.07  | 28317.02  | 33445.05  | 21898.12  | 37196.03  | 20069.36  | 32429.14  |
| 27503.67  | 38922.12  | 34874.68  | 43005.34  | 27956.6   | 36868.04  | 19328.68  | 38613.14  | 17257.13  | 29480.98  |
| 27367.45  | 38369.46  | 35618.14  | 44153.15  | 28775.58  | 35442.05  | 24341.48  | 40948.44  | 16243.5   | 28879.92  |
| 32460.36  | 37100.21  | 35326.95  | 43358.43  | 25630.05  | 37548.05  | 27567.73  | 40237.57  | 18816.36  | 29443.65  |
| 26509.22  | 40585.82  | 34917.28  | 41831.69  | 25542.61  | 40838.99  | 22128.09  | 41279.84  | 13635.15  | 29060.06  |

|           |           |           |           |           |           |           |           |           |           |
|-----------|-----------|-----------|-----------|-----------|-----------|-----------|-----------|-----------|-----------|
| LN320.997 | LN320.998 | LN320.998 | LN320.998 | LN320.998 | LN320.997 | LN320.997 | LN320.998 | LN320.998 | LN320.997 |
| 50842.12  | 57035.92  | 28701.43  | 46464.27  | 47013.78  | 61649.68  | 47639.79  | 27881.73  | 35560.54  | 44836.98  |
| 49435.95  | 54790.01  | 28840.41  | 45275.61  | 43069.24  | 55051.6   | 47423.46  | 29228.3   | 32798.66  | 45387.14  |
| 50404.31  | 57763.24  | 32178.94  | 50253.45  | 50687.34  | 58958.92  | 54372.84  | 30493.34  | 34641.63  | 48855.71  |
| 46198.51  | 60728.04  | 30304.51  | 47697.93  | 47282.57  | 61627.86  | 53599.92  | 30651.29  | 37287.85  | 48685.36  |
| 40750.3   | 56011.7   | 30608.57  | 46721.9   | 48981.7   | 60428.73  | 48246.21  | 28498.25  | 34484.45  | 51292.54  |

|           |           |           |           |           |           |           |           |           |           |
|-----------|-----------|-----------|-----------|-----------|-----------|-----------|-----------|-----------|-----------|
| LN320.998 | LN320.998 | LN320.998 | LN320.998 | LN320.998 | LN320.997 | LN320.998 | LN320.998 | LN320.998 | LN320.998 |
| 27220.18  | 33289.73  | 32731.84  | 19636.62  | 29409.74  | 40101.83  | 26961.12  | 22901.39  | 33192.84  | 15422.33  |
| 27802.79  | 30713.55  | 34485.42  | 18231.05  | 34489.72  | 37530.52  | 27726.93  | 26088.99  | 35957.44  | 14622.3   |
| 28931.57  | 35579.01  | 32619.63  | 17915.68  | 31027.22  | 37256.82  | 29729.23  | 25563.67  | 34190.1   | 15249.76  |
| 27307.86  | 38875.36  | 33486.54  | 17692.58  | 31921.25  | 39810.81  | 26875.92  | 26885.81  | 36103.7   | 14635.56  |
| 27558.68  | 34753.52  | 31817.33  | 15935.42  | 32300.93  | 38391.91  | 29778.38  | 25633.81  | 36385.33  | 11162.95  |

|           |           |           |           |           |           |           |           |           |           |
|-----------|-----------|-----------|-----------|-----------|-----------|-----------|-----------|-----------|-----------|
| LN320.997 | LN320.998 | LN320.998 | LN320.998 | LN320.998 | LN320.998 | LN320.998 | LN320.997 | LN320.998 | LN320.998 |
| 47597.76  | 48913.06  | 12939.23  | 32042.61  | 14000.01  | 47182.62  | 20487.51  | 40136.68  | 34734.96  | 18675.96  |
| 43999.14  | 47027.16  | 14200.29  | 31057.89  | 17186.5   | 45982.37  | 22980.23  | 37786.07  | 34017.52  | 15718.82  |
| 42364.19  | 49720.46  | 13852.03  | 30824.69  | 15596.59  | 47564     | 22917.32  | 37693.94  | 31215.32  | 14727.28  |
| 43984.03  | 54060.8   | 13393.2   | 31194.03  | 14720.99  | 46795.64  | 21503.64  | 35811.72  | 36201.92  | 17502.63  |
| 43043.25  | 50844.9   | 12345.67  | 29525.16  | 17340.02  | 44088.86  | 22328.65  | 39159.74  | 31875.33  | 14534.91  |

|           |           |           |           |           |           |           |           |           |           |
|-----------|-----------|-----------|-----------|-----------|-----------|-----------|-----------|-----------|-----------|
| LN320.998 |
| 23855.02  | 30329.08  | 32145.92  | 30418.43  | 44072.06  | 17382.36  | 40640.93  | 30813.38  | 28045.97  | 44698.96  |
| 23832.09  | 31178.66  | 29875.28  | 29596.76  | 40468.68  | 17330.19  | 36820     | 35375.46  | 27969.87  | 41276.62  |
| 27274.01  | 26410.03  | 33677.75  | 28847.27  | 40927.02  | 18351.24  | 40921.86  | 33352.04  | 28629.45  | 37408.86  |
| 27325.36  | 30400.54  | 28991.74  | 28629.36  | 38881.17  | 19198.6   | 40913.31  | 34838.12  | 23242.57  | 40216.21  |
| 29418.34  | 28494.81  | 26840.79  | 27464.09  | 39846.07  | 17912.41  | 37489.1   | 34543.51  | 24722.09  | 41982.81  |

|           |           |           |           |           |           |           |           |           |           |
|-----------|-----------|-----------|-----------|-----------|-----------|-----------|-----------|-----------|-----------|
| LN320.998 | LN320.998 | LN321.210 | LN321.871 | LN322.872 | LN322.886 | LN322.992 | LN322.992 | LN322.992 | LN322.994 |
| 14069.17  | 20850.53  | 12231.35  | 279200.7  | 65313.2   | 50113.28  | 30841.64  | 57133.63  | 57168.3   | 21494.22  |
| 16643.03  | 22978.82  | 14565.67  | 263064.2  | 59912.34  | 54248.4   | 32230.56  | 59133.79  | 58467.15  | 22996.88  |
| 15434.11  | 21518.36  | 11322.42  | 225899.1  | 57020.28  | 47688.29  | 29331.23  | 57209.95  | 58605.1   | 18378.01  |
| 13150.98  | 20696.85  | 11789.68  | 258858.2  | 55639.34  | 34517.78  | 31825.99  | 57072.96  | 62464.08  | 16255.48  |
| 14027.06  | 22968.41  | 12105.35  | 319980.6  | 65084.3   | 82877.02  | 30474.33  | 59209     | 63906.72  | 24894.68  |

|           |           |           |           |           |           |           |           |           |           |
|-----------|-----------|-----------|-----------|-----------|-----------|-----------|-----------|-----------|-----------|
| LN322.993 | LN322.993 | LN322.993 | LN322.994 | LN322.994 | LN322.993 | LN322.993 | LN322.993 | LN322.993 | LN322.993 |
| 39292.51  | 34250.22  | 34588.43  | 20510.67  | 20365.84  | 42259.04  | 72275.75  | 38320     | 48686.6   | 47794.9   |
| 48745.39  | 37362.42  | 26511.01  | 30751.94  | 16619.19  | 51594.78  | 62697.31  | 32868.49  | 60516.98  | 35478.8   |
| 38842.36  | 36323.16  | 21245.77  | 21857.62  | 18695.56  | 33336.96  | 71758.98  | 30064.79  | 46585.84  | 26545.16  |
| 43350.01  | 28358.15  | 24501.37  | 18050.5   | 13190.01  | 48700.41  | 54782.51  | 34583.15  | 68655.69  | 42281.94  |
| 47580.33  | 38517.81  | 27747.17  | 22104.52  | 16909.98  | 47334.78  | 55970.54  | 35252.33  | 59929.05  | 38294.38  |

|           |           |           |           |           |           |           |           |           |           |
|-----------|-----------|-----------|-----------|-----------|-----------|-----------|-----------|-----------|-----------|
| LN322.993 | LN322.993 | LN322.993 | LN322.993 | LN322.994 | LN322.993 | LN322.993 | LN322.993 | LN322.993 | LN322.993 |
| 22186.88  | 27069.47  | 51119.96  | 29881.21  | 17525.07  | 41113.65  | 58874.51  | 43569.69  | 37083.81  | 61614.26  |
| 27668.48  | 31238.03  | 58169.47  | 30231.52  | 20860.49  | 55171.16  | 68282.5   | 42547.9   | 41118.85  | 72023.69  |
| 20760.03  | 25661.34  | 59231.74  | 29865.16  | 20284.3   | 35560.88  | 40313.76  | 56266.79  | 47966.29  | 55149.59  |
| 32852.69  | 28252.99  | 52772.67  | 31702.43  | 24897.36  | 48204.35  | 75595.88  | 39899.49  | 53075.35  | 52884.39  |
| 29197.07  | 28912.87  | 59472.44  | 31985.33  | 20114.37  | 54018.68  | 69920.05  | 48024     | 43160.17  | 78385.29  |



|           |           |           |           |           |           |           |           |           |           |
|-----------|-----------|-----------|-----------|-----------|-----------|-----------|-----------|-----------|-----------|
| LN322.993 | LN322.994 | LN322.994 | LN322.993 |
| 49621.12  | 15855.28  | 24825.85  | 35676.41  | 39495.39  | 37253.08  | 39528.91  | 28180.47  | 28703.77  | 28184.89  |
| 42389.06  | 20953.37  | 26357.38  | 36475.22  | 52908.61  | 35093.45  | 41573.85  | 33701.88  | 36200.09  | 29168.89  |
| 47761.4   | 13888.4   | 39527.06  | 30163.55  | 57335.38  | 39724.96  | 38831.95  | 21852.56  | 35740.8   | 19819.39  |
| 36389.77  | 18991.4   | 28780.64  | 29837.09  | 48306.61  | 25803.04  | 39275.39  | 29317.73  | 45719.71  | 35059.96  |
| 39236.6   | 18823.22  | 25745.02  | 38739.95  | 46454.61  | 39381.59  | 43356.27  | 34967.19  | 34523.36  | 30754.13  |

|           |           |           |           |           |           |           |           |           |           |
|-----------|-----------|-----------|-----------|-----------|-----------|-----------|-----------|-----------|-----------|
| LN322.993 |
| 48187.44  | 46523.27  | 47142.06  | 59971.69  | 34088.68  | 69745.31  | 40271.67  | 39858.49  | 37464.25  | 61680.56  |
| 49200.09  | 49822.32  | 55404.46  | 47333.81  | 37135.21  | 85770     | 39659.57  | 35099.62  | 41723.09  | 52473.21  |
| 51751.94  | 42705.94  | 62615.94  | 40954.1   | 31064.69  | 69293.04  | 34685.79  | 27592.42  | 26644.93  | 54823.09  |
| 37770.6   | 42945.43  | 47361.11  | 42455.94  | 37390.74  | 60933.16  | 33247.56  | 50057.88  | 26125.53  | 29313.62  |
| 48023.44  | 53457.34  | 63317.78  | 42638.5   | 34372.07  | 91235.05  | 41173.63  | 35550     | 43942.53  | 47553.17  |

|           |           |           |           |           |           |           |           |           |           |
|-----------|-----------|-----------|-----------|-----------|-----------|-----------|-----------|-----------|-----------|
| LN322.993 | LN322.994 | LN322.993 |
| 23433.64  | 30335.62  | 49219.59  | 40643.42  | 72397.78  | 45367.39  | 23884.96  | 43425.16  | 34069.16  | 86277.03  |
| 28216.57  | 35717.76  | 55274.38  | 63679     | 71343.67  | 47339.92  | 29003.66  | 54177.3   | 33236.59  | 74028.06  |
| 21833.72  | 42836.11  | 39495.91  | 37366.16  | 65832.3   | 50796.64  | 29979.66  | 48449.3   | 26034.95  | 70363.19  |
| 30954.63  | 31967.07  | 57693.05  | 54365.65  | 72884.38  | 46656.6   | 27979.23  | 80071.58  | 22918.64  | 66014.01  |
| 29799.97  | 32275.99  | 57147.54  | 57899.07  | 65516.03  | 46647.69  | 30011.76  | 54073.16  | 33342.5   | 71427.42  |

|           |           |           |           |           |           |           |           |           |           |
|-----------|-----------|-----------|-----------|-----------|-----------|-----------|-----------|-----------|-----------|
| LN322.993 | LN322.993 | LN322.994 | LN322.993 | LN322.993 | LN322.993 | LN322.993 | LN322.993 | LN322.993 | LN322.994 |
| 43235.38  | 37525.77  | 17206.24  | 63312.12  | 36862.17  | 35502.76  | 35618.9   | 41488.95  | 38638.26  | 16309.63  |
| 60857.54  | 45484.35  | 16807.78  | 62455.84  | 26498.97  | 40799.22  | 42939.49  | 43767.64  | 37830.45  | 19455.1   |
| 34020.2   | 43188.31  | 16046.06  | 43605.74  | 32900.11  | 38216.28  | 31364.08  | 29808.37  | 28114.4   | 23859.33  |
| 46744.89  | 36279.87  | 17927.25  | 69764.27  | 26347.64  | 41983.87  | 59621.9   | 57416.32  | 28291.45  | 14929.87  |
| 60568.78  | 44110.96  | 17868.27  | 59446.41  | 29460.5   | 39911.69  | 46764.81  | 48187.3   | 35860.76  | 18237.62  |

|           |           |           |           |           |           |           |           |           |           |
|-----------|-----------|-----------|-----------|-----------|-----------|-----------|-----------|-----------|-----------|
| LN322.993 | LN322.994 | LN322.993 |
| 49559.4   | 25748.6   | 34281.74  | 47032.47  | 79748.69  | 57582.4   | 43641.32  | 31957.33  | 18396.61  | 67776.36  |
| 56763     | 29525.6   | 25524.49  | 47809.76  | 80256.6   | 57906.96  | 42802.16  | 41698.68  | 23202.17  | 52121.41  |
| 49958.83  | 21228.53  | 32172.42  | 43598.03  | 42882.07  | 64623.91  | 35211.61  | 41482.33  | 15199.38  | 37304.89  |
| 51864.69  | 26227.84  | 38352.67  | 49217.73  | 66793.98  | 51806.21  | 42845.66  | 37763.27  | 14625.91  | 55039.55  |
| 54235.17  | 30753.11  | 23800.75  | 43336.73  | 86382.49  | 56685.95  | 40619.7   | 43450.91  | 24421.4   | 53172.52  |

|           |           |           |           |           |           |           |           |           |           |
|-----------|-----------|-----------|-----------|-----------|-----------|-----------|-----------|-----------|-----------|
| LN322.993 | LN322.993 | LN322.994 | LN322.993 | LN322.993 | LN322.994 | LN323.012 | LN323.012 | LN323.013 | LN323.013 |
| 14285.21  | 42836.55  | 21721.17  | 54641.63  | 75999.94  | 22407.57  | 63106.2   | 55616.34  | 56802.13  | 43155.11  |
| 11779.21  | 40643.39  | 19289.26  | 67535.86  | 72198.71  | 25339.03  | 61911.96  | 96231.52  | 70434.71  | 38133.42  |
| 13747.84  | 39670.09  | 16523.43  | 38566.52  | 61838.43  | 35536.28  | 62943.15  | 65747.05  | 51139.58  | 41712.81  |
| 18087.72  | 29037.81  | 17434.78  | 52574.09  | 65062.97  | 22810.44  | 66748.37  | 70002.55  | 59206.48  | 39601.82  |
| 16614.94  | 45357.1   | 19116.2   | 67908.62  | 69756.47  | 24759.76  | 70858.83  | 56104.51  | 49349.98  | 48103.66  |

|           |           |           |           |           |           |           |           |           |           |
|-----------|-----------|-----------|-----------|-----------|-----------|-----------|-----------|-----------|-----------|
| LN323.013 |
| 44436.91  | 19681.63  | 37363.54  | 69534.44  | 36057.22  | 47509.03  | 45776.11  | 17491.56  | 43558.41  | 64304.72  |
| 35299.97  | 20214.89  | 30172.35  | 76924.28  | 42933.88  | 76690.94  | 35027.98  | 12035.43  | 39083.27  | 89491.6   |
| 38013.86  | 19992.87  | 33724.49  | 71721.94  | 36611.56  | 44467.11  | 45549.87  | 16101.13  | 43401.92  | 68285.32  |
| 37976.72  | 18092.52  | 37595.71  | 63468.13  | 35923.62  | 47312.88  | 43880.61  | 14116.93  | 36792.79  | 60110.96  |
| 33594.74  | 19457.99  | 28485.98  | 91314.82  | 28153.89  | 48910.21  | 41417.51  | 9718.862  | 29710.61  | 74651.37  |

|           |           |           |           |           |           |           |           |           |           |
|-----------|-----------|-----------|-----------|-----------|-----------|-----------|-----------|-----------|-----------|
| LN323.013 |
| 53164.94  | 29571.88  | 59625.52  | 41024.43  | 48750.91  | 49551.07  | 41319.11  | 37208.22  | 52122.52  | 37931.64  |
| 40495.81  | 22847.13  | 65686.96  | 38595.6   | 52206.18  | 47459.15  | 59761.23  | 24545.35  | 45210.38  | 45272.88  |
| 48212.04  | 28331.23  | 84525.94  | 44489.57  | 52595.92  | 56087.49  | 41959.79  | 29114.6   | 46693.92  | 48084.48  |
| 47639.28  | 31485.56  | 83794.93  | 46906.59  | 55715.72  | 50564.44  | 45561.67  | 30574.36  | 56272.06  | 43843.23  |
| 56252.79  | 27564.01  | 67875.19  | 42827.92  | 56155.21  | 37971.21  | 36422.03  | 31300.21  | 44261.15  | 37060.36  |



|           |           |           |           |           |           |           |           |           |           |
|-----------|-----------|-----------|-----------|-----------|-----------|-----------|-----------|-----------|-----------|
| LN323.013 |
| 38592.48  | 55122.59  | 48022.35  | 33556.32  | 35837.19  | 63579.85  | 50080.74  | 73934.56  | 52500.87  | 42582.35  |
| 39388.43  | 65167.76  | 50617.5   | 29070.86  | 40294.04  | 63636.85  | 44210.11  | 75608.67  | 51756.12  | 37042.85  |
| 38941.75  | 53429.81  | 44125.08  | 37228.19  | 34811.97  | 58838.11  | 47945.84  | 67627.23  | 52317.38  | 40870.8   |
| 39759.44  | 49002.14  | 47053.38  | 35413.78  | 35466.46  | 62157.87  | 48084.28  | 67678     | 52832.18  | 42334.46  |
| 29484.28  | 57288.56  | 43619.87  | 31713.11  | 29603.68  | 62256.64  | 38454.22  | 101435.4  | 61461.71  | 58588.99  |

|           |           |           |           |           |           |           |           |           |           |
|-----------|-----------|-----------|-----------|-----------|-----------|-----------|-----------|-----------|-----------|
| LN323.013 |
| 36884.98  | 55360.23  | 73094.04  | 40653.55  | 24040.28  | 33516.78  | 44001.24  | 27199.99  | 47396.43  | 37906.44  |
| 44350.98  | 56115.28  | 106813.9  | 29615.46  | 20478.32  | 23577.75  | 56445.42  | 22824.27  | 79118.82  | 30915.75  |
| 40762.61  | 59804.02  | 73023.61  | 37471.51  | 21387.16  | 37291.06  | 48681.91  | 25443.22  | 45935.33  | 33875.15  |
| 35015.39  | 54740.43  | 75260.98  | 42060.56  | 23114.66  | 36507.64  | 43527.83  | 22290.84  | 49641.26  | 33820.73  |
| 42594.7   | 52064.15  | 75892.35  | 32870.79  | 20539.94  | 29572.8   | 44183.19  | 26982.72  | 110207.9  | 35315.99  |

|           |           |           |           |           |           |           |           |           |           |
|-----------|-----------|-----------|-----------|-----------|-----------|-----------|-----------|-----------|-----------|
| LN323.013 |
| 15165.67  | 76090.03  | 42589.54  | 49453.26  | 46074.3   | 68507.56  | 37225.72  | 26294.91  | 50470.23  | 22856.68  |
| 17925.11  | 71214.51  | 62817.78  | 47823.2   | 32886.17  | 52894.51  | 56474.96  | 25914.6   | 66846.51  | 15667.63  |
| 15622.1   | 73587.79  | 40763.7   | 46437.44  | 46281.69  | 48788.78  | 36462.2   | 29933.95  | 57805.59  | 21079.55  |
| 16812.92  | 76032.23  | 44380.38  | 49425.39  | 45900.77  | 45758.54  | 36430.18  | 28841.78  | 59089.12  | 23584.82  |
| 15257.39  | 83087.14  | 46992.63  | 54506.15  | 37765.18  | 57717.44  | 29792.62  | 44255.37  | 46117.96  | 18165.22  |

|           |           |           |           |           |           |           |           |           |           |
|-----------|-----------|-----------|-----------|-----------|-----------|-----------|-----------|-----------|-----------|
| LN323.013 |
| 36839.38  | 35791.32  | 37307.2   | 53380.11  | 35526.21  | 52063.32  | 51408.09  | 41637.83  | 64582.59  | 67110.56  |
| 29344.01  | 46097.84  | 38252.17  | 36902.17  | 54661.22  | 56030.74  | 32545.81  | 37074.8   | 77917.63  | 64466.17  |
| 34456.82  | 39384.9   | 32524.8   | 53329.87  | 34216.99  | 63128.49  | 52235.66  | 41941.25  | 63630.15  | 60015.76  |
| 34575.52  | 36741.89  | 34647.26  | 48447.35  | 30820.25  | 55370.5   | 48801.97  | 43254.86  | 63069.36  | 59718.41  |
| 28952.39  | 35435.59  | 39663.67  | 33420.18  | 49510.51  | 48256.56  | 28258.86  | 45887.87  | 64030.76  | 91151.66  |

|           |           |           |           |           |           |           |           |           |           |
|-----------|-----------|-----------|-----------|-----------|-----------|-----------|-----------|-----------|-----------|
| LN323.013 |
| 27809.08  | 21650.75  | 58446.53  | 52191.9   | 21129.24  | 55137.43  | 70575.52  | 28670.18  | 36032.06  | 29121.52  |
| 28016.43  | 21035.81  | 65802.04  | 53692.47  | 17340.21  | 78942.45  | 78821.91  | 31123.79  | 19934.31  | 38624.72  |
| 32892.94  | 18479.22  | 63443.17  | 55910.98  | 19805.53  | 54337.61  | 71107.85  | 27874.7   | 30673.13  | 31806.82  |
| 33721.84  | 19633.44  | 57357.77  | 55519.95  | 20656.91  | 52273.52  | 75021.77  | 31913.41  | 31977.58  | 30477.15  |
| 35533.63  | 31624.51  | 67047.53  | 40968.35  | 16933.37  | 49590.16  | 80158.74  | 26757.88  | 30548.1   | 34898.55  |

|           |           |           |           |           |           |           |           |           |           |
|-----------|-----------|-----------|-----------|-----------|-----------|-----------|-----------|-----------|-----------|
| LN323.013 | LN323.013 | LN323.013 | LN323.013 | LN323.013 | LN323.014 | LN323.013 | LN323.013 | LN323.220 | LN323.220 |
| 37534.59  | 48380.11  | 19681.24  | 35484.1   | 54925.43  | 23171.43  | 38759.24  | 58110.54  | 167791.7  | 23912.66  |
| 30476.43  | 45688.79  | 26710.31  | 44244.28  | 61607.77  | 17243.92  | 38785.4   | 75403.5   | 176494.2  | 24488.51  |
| 37234.58  | 44856.85  | 21416.21  | 35514.82  | 54577     | 24206.1   | 42862.53  | 58585.36  | 209999.2  | 24800.25  |
| 35582.84  | 45067.89  | 19775.08  | 36930.23  | 48510.28  | 19807.64  | 39218.95  | 64344.18  | 146061    | 24961.44  |
| 51237.96  | 48991.23  | 20227.66  | 29127.71  | 90657.25  | 22943.16  | 40630.65  | 60703.35  | 148064.6  | 28001.67  |

|           |           |           |           |           |           |           |           |           |           |
|-----------|-----------|-----------|-----------|-----------|-----------|-----------|-----------|-----------|-----------|
| LN323.872 | LN323.908 |
| 30137.27  | 35318.71  | 22888.22  | 21973     | 22716.37  | 40920.8   | 27828.13  | 17717.59  | 24352.51  | 31799.05  |
| 22458.67  | 34725.3   | 18667.01  | 22956.1   | 22606.99  | 38887.71  | 30277.24  | 17383.19  | 22488.11  | 28972.15  |
| 33321.98  | 35530.71  | 21384.1   | 22014.85  | 24173.72  | 42392.93  | 29642.35  | 15654.76  | 18906.89  | 29271.62  |
| 29910.19  | 32598.64  | 19530.46  | 18793.55  | 22454.06  | 36960.12  | 28308.01  | 16655.38  | 19169.52  | 28555.5   |
| 25443.42  | 46141.33  | 19517.75  | 21496.16  | 24447.65  | 47883.16  | 31033.96  | 18052.8   | 17204.55  | 27949.64  |

|           |           |           |           |           |           |           |           |           |           |
|-----------|-----------|-----------|-----------|-----------|-----------|-----------|-----------|-----------|-----------|
| LN323.909 | LN323.908 | LN323.909 | LN323.909 | LN323.909 | LN323.908 | LN323.908 | LN323.909 | LN323.909 | LN323.908 |
| 29325.69  | 31603.22  | 24186.06  | 19312.96  | 27384.9   | 30047.36  | 41251.36  | 24628.79  | 23706.73  | 23353.73  |
| 30972.69  | 29401.35  | 24669.74  | 18744.09  | 24697.85  | 25486.98  | 34659.83  | 24878.83  | 24600.32  | 21960.36  |
| 27366.36  | 23862.71  | 25136.74  | 19710.92  | 27411.29  | 31412.91  | 42019.95  | 23115.4   | 22829.02  | 24969.43  |
| 24991.61  | 24417.81  | 24820.96  | 19160.3   | 26497.19  | 27148.96  | 37949.09  | 23277.38  | 25857.9   | 21729.3   |
| 26954.06  | 30453.55  | 25456.32  | 19904.18  | 27410.24  | 27472.89  | 41634.76  | 24078.37  | 22687.42  | 22859.08  |



|           |           |           |           |           |           |           |           |           |           |
|-----------|-----------|-----------|-----------|-----------|-----------|-----------|-----------|-----------|-----------|
| LN323.909 | LN323.909 | LN323.908 |
| 23121.64  | 30224.86  | 29254.73  | 34779.74  | 21690.94  | 21728.73  | 31263.11  | 18962.58  | 29255.81  | 29225.46  |
| 25678.56  | 32234.88  | 30545.64  | 31909.11  | 20821.11  | 24856.29  | 31032.65  | 20939.2   | 28155.28  | 29362.33  |
| 24922.25  | 26474.51  | 28899.85  | 33106.59  | 20087.42  | 22287.28  | 27811.88  | 18629.84  | 26648.44  | 29167.71  |
| 21605.52  | 28524.58  | 29179.41  | 33135.39  | 20469.39  | 20486.16  | 25691.6   | 17764.11  | 26596.89  | 25119.47  |
| 25335.28  | 28468.28  | 29783.45  | 32090.01  | 21323.21  | 23701.77  | 31452.81  | 18596.14  | 28491.05  | 27059.75  |

|           |           |           |           |           |           |           |           |           |           |
|-----------|-----------|-----------|-----------|-----------|-----------|-----------|-----------|-----------|-----------|
| LN323.908 | LN323.908 | LN323.908 | LN323.909 | LN323.908 | LN323.909 | LN323.908 | LN323.909 | LN323.908 | LN323.909 |
| 27697.22  | 17961.47  | 26268.7   | 22193.71  | 28293.5   | 18308.72  | 21907.42  | 21670.49  | 37076.12  | 26588.7   |
| 26595.18  | 17780.45  | 19661.49  | 24924.63  | 25353.44  | 18516.78  | 22160.58  | 24295.86  | 32507.33  | 23643.31  |
| 24575.92  | 16724.31  | 20639.95  | 18876.47  | 24713.55  | 16966.41  | 20740.59  | 19225.11  | 36625.77  | 23500.68  |
| 24115.2   | 17502.18  | 23303.09  | 19869.66  | 25918.14  | 17802.35  | 21001.16  | 19791.29  | 32669.74  | 26322.54  |
| 25903.51  | 17249.79  | 26137.62  | 21520.55  | 26686.51  | 17022.24  | 21157.87  | 21525.16  | 32644.99  | 24208.55  |

|           |           |           |           |           |           |           |           |           |           |           |
|-----------|-----------|-----------|-----------|-----------|-----------|-----------|-----------|-----------|-----------|-----------|
| LN323.909 | LN323.909 | LN323.908 | LN323.909 | LN324.223 |
| 16597.36  | 20189.75  | 28776.99  | 43361.03  | 19927.75  | 28476.8   | 30957.48  | 40561.75  | 31031.41  | 25376.47  |           |
| 17077.06  | 25440.94  | 26812.3   | 43941.62  | 21606.15  | 26448.25  | 33314.4   | 39894.77  | 31647.92  | 24808.11  |           |
| 15217.03  | 23187.98  | 27378.37  | 42778.3   | 18654.07  | 26990.09  | 34527.54  | 39406.59  | 29229     | 30402.91  |           |
| 16172.8   | 22117.72  | 25415.43  | 38310.35  | 15617.02  | 27561.92  | 30520.91  | 40623.97  | 30009.88  | 20952.13  |           |
| 17331.52  | 22772.2   | 28854.5   | 40679.03  | 19423.74  | 26102.41  | 30450.69  | 40105.5   | 32909.46  | 24139.05  |           |

|           |           |           |           |           |           |           |           |           |           |
|-----------|-----------|-----------|-----------|-----------|-----------|-----------|-----------|-----------|-----------|
| LN324.834 | LN324.881 | LN324.882 | LN324.882 | LN324.882 | LN324.907 | LN324.989 | LN324.990 | LN324.989 | LN324.990 |
| 39533.39  | 46748.05  | 21231.89  | 22355.39  | 29045.75  | 25960.65  | 29721.25  | 24435.66  | 56871.57  | 48582.73  |
| 32967.73  | 44489.63  | 23479.8   | 20491.84  | 31912.09  | 32242.85  | 47491.74  | 29295.94  | 61386.84  | 41720.66  |
| 36134.62  | 47134.58  | 22175.92  | 18836.01  | 31190.61  | 43251.96  | 29252.01  | 25171.39  | 46389.27  | 35579.03  |
| 40299.59  | 49599.4   | 19728.96  | 18468.59  | 30333.35  | 29164.99  | 30404.75  | 25243.35  | 41356.57  | 32535.09  |
| 51692.79  | 51772.2   | 22821.07  | 19781.29  | 31629.08  | 42779.13  | 30801.82  | 26605.15  | 44617.16  | 31593.25  |

|           |           |           |           |           |           |           |           |           |           |
|-----------|-----------|-----------|-----------|-----------|-----------|-----------|-----------|-----------|-----------|
| LN324.990 | LN324.989 | LN324.990 |
| 25541.91  | 57944.51  | 55472.36  | 33049.94  | 29935.1   | 38384.18  | 37708.4   | 27441.01  | 22105.75  | 50226.49  |
| 38533.26  | 45301.05  | 43333.29  | 30425.75  | 34629.94  | 39008.93  | 30242.75  | 19165.01  | 32502.87  | 43574.52  |
| 35150.57  | 45116.71  | 41778.64  | 30759.42  | 32433.08  | 35950.78  | 28128.13  | 24472.95  | 26147.68  | 42115     |
| 31916.12  | 48461.3   | 44625.23  | 30227.96  | 26596.81  | 38074.41  | 25851.09  | 26139.09  | 23817.66  | 42646.52  |
| 33430.56  | 47820.94  | 45557.8   | 29828.95  | 28873.15  | 34181.83  | 27976.49  | 24545.82  | 27806.47  | 39585.55  |

|           |           |           |           |           |           |           |           |           |           |
|-----------|-----------|-----------|-----------|-----------|-----------|-----------|-----------|-----------|-----------|
| LN324.990 | LN324.990 | LN324.990 | LN324.990 | LN324.990 | LN324.991 | LN324.991 | LN324.990 | LN324.990 | LN324.989 |
| 33320.09  | 32011.66  | 47149.97  | 66802.1   | 18964.19  | 14583     | 18519.74  | 30952.16  | 33157.33  | 66824.32  |
| 29453.2   | 22834.98  | 51411.35  | 35211.35  | 24990.03  | 14545.16  | 36471.39  | 26913.95  | 33374.17  | 72016.3   |
| 28586.92  | 22438.03  | 48913.33  | 38621.51  | 20477.74  | 12133.26  | 19472.99  | 30617.12  | 23748     | 53811.37  |
| 29147.17  | 24924.44  | 43982.96  | 42557.57  | 21525.59  | 10545     | 16554.85  | 28070.83  | 28454.89  | 59822.07  |
| 28991.37  | 23890.57  | 47824.31  | 37125.68  | 18176.77  | 10700.56  | 18520.81  | 27667.39  | 25256.69  | 59441.83  |

|           |           |           |           |           |           |           |           |           |           |
|-----------|-----------|-----------|-----------|-----------|-----------|-----------|-----------|-----------|-----------|
| LN324.991 | LN324.991 | LN324.990 | LN324.990 | LN324.990 | LN324.990 | LN324.990 | LN324.990 | LN324.991 | LN324.990 |
| 13187.69  | 17087.24  | 23807.74  | 43357.87  | 49718.22  | 46898.31  | 25035.83  | 29711.95  | 14538.78  | 36571.18  |
| 16766.73  | 28667.92  | 23497.64  | 47082.73  | 33867.81  | 37360.81  | 25674.62  | 27623.36  | 14898.49  | 44727.99  |
| 12610.27  | 17257.05  | 29037.9   | 36742.13  | 51306.56  | 39338.04  | 25933.46  | 31333.46  | 11682.73  | 35864.61  |
| 14795.49  | 17910.19  | 27962.48  | 38435.69  | 49880.24  | 42424.58  | 24249.4   | 28078.5   | 14127.39  | 33565.78  |
| 12865.51  | 16432.76  | 29238.47  | 41206.67  | 42857.95  | 39422.38  | 23173.96  | 28509.25  | 11258.69  | 29360.31  |

|           |           |           |           |           |           |           |           |           |           |
|-----------|-----------|-----------|-----------|-----------|-----------|-----------|-----------|-----------|-----------|
| LN324.990 | LN324.990 | LN324.991 | LN324.990 | LN324.990 | LN324.990 | LN324.990 | LN324.991 | LN324.990 | LN324.990 |
| 25393.06  | 85167.02  | 10082.92  | 21635.65  | 30409.01  | 30778.15  | 44280.51  | 18195.52  | 34034.5   | 34904.87  |
| 23097.77  | 67859.29  | 12516.4   | 30083.36  | 25565.65  | 27221.17  | 40629.99  | 16466.88  | 56308.64  | 27195.01  |
| 21400.92  | 65436.97  | 14026.46  | 25426.24  | 30455.8   | 25810.87  | 37411.33  | 13836.9   | 37990.93  | 44014.5   |
| 21020.15  | 62096.36  | 12463.25  | 24559.71  | 26238.69  | 24853.94  | 38993.41  | 14564.34  | 39784.84  | 36975.03  |
| 21959.46  | 67656.44  | 13477.76  | 24143.64  | 33893.13  | 23611.49  | 35592.33  | 17836.42  | 40866.92  | 37716.21  |



|           |           |           |           |           |           |           |           |           |           |
|-----------|-----------|-----------|-----------|-----------|-----------|-----------|-----------|-----------|-----------|
| LN324.990 | LN324.991 | LN324.990 |
| 25180.6   | 36935.44  | 35067.47  | 38490.94  | 36108.51  | 27025.06  | 26129.88  | 15708.58  | 17389.05  | 41957.72  |
| 31411.99  | 56316.79  | 43415.58  | 27809.08  | 43305.67  | 23855.21  | 36354.76  | 11279.46  | 18797.22  | 50230.26  |
| 28417.71  | 35057.02  | 48316.91  | 28011.69  | 33698.97  | 22991.29  | 25671.57  | 10571.71  | 15022.63  | 53281.71  |
| 31592.23  | 34727.4   | 41229.81  | 30575.66  | 36167.34  | 21432.15  | 25748.31  | 12307.61  | 16455.9   | 49495.82  |
| 30621.81  | 34538.1   | 44167.8   | 27005.26  | 35886.44  | 24341.76  | 27195.12  | 10768.41  | 15206.16  | 47300.33  |

|           |           |           |           |           |           |           |           |           |           |
|-----------|-----------|-----------|-----------|-----------|-----------|-----------|-----------|-----------|-----------|
| LN324.990 | LN324.990 | LN324.990 | LN324.990 | LN324.990 | LN324.989 | LN324.990 | LN324.990 | LN324.990 | LN324.990 |
| 33611.31  | 31207.94  | 21050.88  | 40975.62  | 47860.64  | 49098.93  | 50491.47  | 14869.1   | 37658.61  | 41450.97  |
| 31246.39  | 43460.39  | 16191.38  | 37827.48  | 31859.89  | 81251.8   | 28713.65  | 12786.99  | 31346.81  | 33587.49  |
| 26666.05  | 30291.05  | 18092.38  | 41364.96  | 35738.35  | 67053.69  | 27908     | 15178.97  | 29345.43  | 44266.58  |
| 29075.52  | 33513.27  | 18686.97  | 38264.72  | 38202.34  | 61927.32  | 32238.53  | 13709.74  | 32874.44  | 46809.98  |
| 29281.89  | 29860.04  | 18134.19  | 38621.57  | 35233.7   | 65324.11  | 30973.72  | 13250.62  | 31933.33  | 48845.94  |

|           |           |           |           |           |           |           |           |           |           |
|-----------|-----------|-----------|-----------|-----------|-----------|-----------|-----------|-----------|-----------|
| LN324.991 | LN324.990 | LN324.991 | LN324.990 | LN324.991 | LN324.990 | LN324.990 | LN324.990 | LN324.990 | LN324.990 |
| 31380.74  | 53721.69  | 13012.7   | 33588.61  | 27214.34  | 50786.14  | 31746.28  | 32763.13  | 27772.14  | 29506.24  |
| 19686.62  | 36230.21  | 16629.66  | 39577.28  | 18531.32  | 56041.43  | 37209.11  | 39923.65  | 43135.69  | 28141.57  |
| 25403.83  | 38410.12  | 12503.23  | 32264.41  | 24960.15  | 43285.04  | 32843.42  | 39361.89  | 34881.94  | 27165.18  |
| 22890.31  | 44558.87  | 13941.47  | 30896.79  | 21221.55  | 44037.28  | 29160.39  | 41526.69  | 36357.1   | 25752.69  |
| 27139.94  | 45846.87  | 13342.79  | 32122.05  | 25232.55  | 45379.56  | 28316.81  | 36682.05  | 31937.07  | 27344.92  |

|           |           |           |           |           |           |           |           |           |           |
|-----------|-----------|-----------|-----------|-----------|-----------|-----------|-----------|-----------|-----------|
| LN324.991 | LN324.990 | LN324.990 | LN324.990 | LN324.990 | LN324.991 | LN324.990 | LN324.990 | LN324.991 | LN325.004 |
| 30451.13  | 24378.77  | 14658.2   | 45139.32  | 34242.28  | 25676.25  | 54429.25  | 27820.75  | 16458.61  | 14962.84  |
| 21990.17  | 30156.45  | 23174.76  | 35213.16  | 33594.38  | 19315.64  | 55231.61  | 31609.39  | 22548.24  | 11399.85  |
| 22788.65  | 30615.31  | 14051.26  | 36752.57  | 29658.29  | 15606.28  | 53591.34  | 28381.64  | 18171.15  | 11893.76  |
| 20444.24  | 26111.92  | 14481.62  | 37585.17  | 27000.38  | 19907.38  | 51006.89  | 28646.91  | 20069.47  | 14663.57  |
| 22808.27  | 27282.45  | 10668.84  | 38775.15  | 26155.18  | 16398.04  | 47202.87  | 26694.03  | 17016.47  | 13177.07  |

|           |           |           |           |           |           |           |           |           |           |
|-----------|-----------|-----------|-----------|-----------|-----------|-----------|-----------|-----------|-----------|
| LN325.832 | LN326.829 | LN326.903 |
| 32072.36  | 364954.6  | 144326    | 164878.8  | 106963.3  | 142284.6  | 157410.8  | 192216    | 130283.5  | 146580    |
| 30392.6   | 307334.1  | 168105.8  | 199070.2  | 101439.7  | 145805.2  | 162833.4  | 189344.8  | 130311.5  | 165122.9  |
| 36302.51  | 366007.9  | 216615.3  | 127811.1  | 134846.6  | 143990.4  | 197690.4  | 134395.3  | 180928.9  | 125781.2  |
| 38071.87  | 427629.4  | 152504.1  | 148312.4  | 104270.1  | 144681.2  | 150992.5  | 178483.7  | 138970.5  | 160087    |
| 39812.66  | 519407.8  | 217136.8  | 144218.7  | 61199.09  | 132509.5  | 195212    | 174821    | 113466.3  | 170031.4  |

|           |           |           |           |           |           |           |           |           |           |
|-----------|-----------|-----------|-----------|-----------|-----------|-----------|-----------|-----------|-----------|
| LN326.903 |
| 209886.1  | 213534.7  | 132363.1  | 189571.4  | 179878.7  | 150498.3  | 186503.3  | 154327.9  | 116011.2  | 131321.5  |
| 223716.4  | 236305.3  | 125513    | 190881.3  | 181254.2  | 153159.6  | 196020.5  | 137266.9  | 105643.2  | 137799    |
| 261484.4  | 234879.7  | 119839.1  | 194766.5  | 199321.4  | 154728.5  | 185710.9  | 147275.7  | 131488.7  | 136443.2  |
| 232580    | 239612.5  | 123874.6  | 187982.8  | 184750.1  | 163784.3  | 198049    | 140443.8  | 97043.34  | 143252.2  |
| 180892.1  | 235254.2  | 117646.7  | 191458.1  | 176029.5  | 159850.7  | 201296.5  | 147228.1  | 93084.73  | 126260.4  |

|           |           |           |           |           |           |           |           |           |           |
|-----------|-----------|-----------|-----------|-----------|-----------|-----------|-----------|-----------|-----------|
| LN326.903 | LN326.987 | LN326.987 |
| 170446.8  | 187982.5  | 154552.9  | 178369.3  | 138919.6  | 134541.4  | 57088.91  | 64359.33  | 73174.23  | 108562    |
| 174110.3  | 189069.1  | 154374.5  | 173962.4  | 143403    | 126274.2  | 60472.29  | 61552.01  | 79026.38  | 107928.3  |
| 175858.1  | 195208.4  | 173028.7  | 174911.4  | 137341.7  | 133145.6  | 63125.82  | 67671.84  | 75435.93  | 104038.6  |
| 170934.1  | 199497.9  | 174330    | 175409.7  | 136859.3  | 119449.9  | 53109.52  | 57321.61  | 71614.93  | 104586.8  |
| 151208.7  | 185793    | 166907.5  | 168390.5  | 126567.9  | 116968.8  | 52403.65  | 59331.89  | 79559.41  | 107450.6  |

|           |           |           |           |           |           |           |           |           |           |
|-----------|-----------|-----------|-----------|-----------|-----------|-----------|-----------|-----------|-----------|
| LN326.988 |
| 108230.1  | 64514.79  | 55197.35  | 79396.5   | 64743.91  | 59749.13  | 35219.72  | 92485.81  | 80436.92  | 68846.59  |
| 96372.41  | 55543.01  | 42569.89  | 99902.51  | 58021.85  | 53790.08  | 43250.56  | 97609.58  | 52690.64  | 66027.07  |
| 69436.44  | 34702.39  | 62949.28  | 109094.1  | 88585.93  | 63587.61  | 51912.53  | 58796.92  | 54917.81  | 58518.34  |
| 78533.58  | 45811.65  | 54062.67  | 81580.24  | 58617.57  | 50392.11  | 46433.13  | 80948.69  | 62778.03  | 69109.71  |
| 85051.33  | 32487.98  | 31775.66  | 101146.7  | 73854.95  | 48203.37  | 31767.69  | 94024.09  | 84729.24  | 65450.66  |



|           |           |           |           |           |           |           |           |           |           |
|-----------|-----------|-----------|-----------|-----------|-----------|-----------|-----------|-----------|-----------|
| LN326.988 |
| 57721.72  | 46608.04  | 47759.43  | 105491.2  | 90462.47  | 66680.46  | 74734.9   | 57801.86  | 91155.98  | 85664.06  |
| 70339.46  | 29974     | 74448.37  | 72288.76  | 48716.58  | 104420    | 62812.27  | 64882.98  | 87672.66  | 85955.73  |
| 72531.27  | 46300.07  | 63453.36  | 59254.16  | 54813.55  | 112326.2  | 61538.92  | 55993.65  | 80317.61  | 101691.4  |
| 53665.49  | 41308.06  | 51778.69  | 76426.37  | 76508.06  | 93703.91  | 61146.65  | 47201.01  | 85833.28  | 76700.92  |
| 67197.32  | 38352.55  | 61362.56  | 94060.68  | 56127.2   | 57972.17  | 90480.29  | 60944.2   | 117725.8  | 71919.56  |

|           |           |           |           |           |           |           |           |           |           |
|-----------|-----------|-----------|-----------|-----------|-----------|-----------|-----------|-----------|-----------|
| LN326.988 |
| 32307.86  | 68796.1   | 75110.63  | 66745.39  | 16694.26  | 93582.01  | 55650     | 80467.32  | 47746.08  | 67211.49  |
| 30860.95  | 63691.79  | 94840.55  | 79387.58  | 17913.88  | 68034.54  | 55957.93  | 87123.63  | 40268.14  | 96187.6   |
| 28373.64  | 75774.99  | 79994.02  | 73201.44  | 16562.45  | 82146.4   | 50682.54  | 110040.8  | 44599.46  | 86486.59  |
| 22909.69  | 82903.63  | 88945.31  | 59161.87  | 18056.44  | 105532.6  | 79165.27  | 132744    | 35945.52  | 69869.05  |
| 25850.49  | 62990.54  | 92988.51  | 56678.9   | 22938.55  | 80912.8   | 45870.03  | 126787.7  | 44065.34  | 88064.06  |

|           |           |           |           |           |           |           |           |           |           |
|-----------|-----------|-----------|-----------|-----------|-----------|-----------|-----------|-----------|-----------|
| LN326.988 |
| 114818.5  | 60021.91  | 31353.01  | 30448.42  | 38624.4   | 92609.53  | 76547.1   | 58193.71  | 42531.03  | 85314.56  |
| 108188.8  | 72612.93  | 36433.5   | 39434.77  | 48749.34  | 61865.28  | 91883.12  | 66588.32  | 55091.97  | 97552.82  |
| 99415.28  | 70706.11  | 32792.16  | 38378.72  | 31320.37  | 86739.38  | 62566.03  | 75376.51  | 54587.96  | 83075.32  |
| 94552.9   | 56741.29  | 29029.96  | 71049.62  | 48304.98  | 64859.61  | 71318.88  | 46973.01  | 61098.95  | 127171.6  |
| 142780.1  | 57104.42  | 24790.25  | 48768.23  | 48434.09  | 75689.76  | 70041.46  | 57533.78  | 44747.8   | 77341.18  |

|           |           |           |           |           |           |           |           |           |           |
|-----------|-----------|-----------|-----------|-----------|-----------|-----------|-----------|-----------|-----------|
| LN326.988 |
| 60985.8   | 30564.23  | 48660.9   | 57958.5   | 54676.66  | 62872.45  | 64618.82  | 113988.5  | 54965.04  | 72464.99  |
| 66949.01  | 22672.7   | 44325.24  | 82216.45  | 57299.7   | 38605.18  | 40988.44  | 61480.37  | 51500.57  | 57667.63  |
| 64720.24  | 21664.62  | 41585.93  | 81787.81  | 53321.07  | 35205.93  | 43950.72  | 83484.9   | 42121.13  | 61615.38  |
| 60961.62  | 30937.18  | 52730.54  | 99097.88  | 38544.29  | 59064.11  | 42938.95  | 72255.12  | 55396.55  | 70525.18  |
| 67409.33  | 33012.69  | 37053.37  | 87556.48  | 46567.71  | 59439.5   | 47932.77  | 97023.98  | 42617.56  | 67609.99  |

|           |           |           |           |           |           |           |           |           |           |
|-----------|-----------|-----------|-----------|-----------|-----------|-----------|-----------|-----------|-----------|
| LN326.988 |
| 31849.99  | 41735.09  | 110594.9  | 55940.81  | 75304.66  | 73988.37  | 142133    | 29952.41  | 54795.08  | 44109.8   |
| 31554.04  | 59858.61  | 119623.2  | 60352.03  | 89345.27  | 74718.33  | 130966.2  | 28045.07  | 39981.73  | 48853.75  |
| 42893.39  | 47090.02  | 82878.15  | 61185.78  | 109701.2  | 84861.16  | 113976.3  | 28726.09  | 67611.34  | 46915.43  |
| 33677.56  | 36073.95  | 86896.06  | 73351.49  | 74908.49  | 82538.46  | 95318.31  | 28426.95  | 34354.52  | 43650.48  |
| 30412.93  | 48999.91  | 66351.44  | 116484.8  | 65427.36  | 93552.11  | 85887.68  | 23354.41  | 37393.53  | 41376.46  |

|           |           |           |           |           |           |           |           |           |           |
|-----------|-----------|-----------|-----------|-----------|-----------|-----------|-----------|-----------|-----------|
| LN326.988 |
| 49205.24  | 69230.43  | 53566.16  | 63681.35  | 148383.4  | 129254.8  | 46628.37  | 71335.58  | 28258.05  | 79664.1   |
| 51896.79  | 71586.27  | 48776.84  | 59688.12  | 96409.76  | 106842.9  | 41209.77  | 46053.18  | 30135.21  | 81376.11  |
| 58852.14  | 64962.75  | 66959.85  | 41102.46  | 128172.4  | 117426.8  | 58739.44  | 60088.53  | 34104.12  | 83846.63  |
| 36266.99  | 79619.02  | 57623.2   | 60365.97  | 118706.4  | 122418.6  | 57059.16  | 40573.57  | 30383.15  | 86024.59  |
| 43253.72  | 68847.14  | 57985.21  | 61170.74  | 112946.8  | 105133.4  | 46752.03  | 38848.08  | 22198.44  | 89976.15  |

|           |           |           |           |           |           |           |           |           |           |
|-----------|-----------|-----------|-----------|-----------|-----------|-----------|-----------|-----------|-----------|
| LN326.988 |
| 63562.45  | 106957.6  | 23300.17  | 27792.78  | 82212.35  | 64682.07  | 88724.45  | 20544.78  | 60581.9   | 45651.65  |
| 97359.1   | 122283.7  | 21811.75  | 25825.22  | 110741.5  | 57411.94  | 76156.17  | 21869.8   | 43629.07  | 34737.63  |
| 79586.88  | 114121.2  | 22147.97  | 27981.43  | 91273.07  | 62474.71  | 85390.7   | 32154.93  | 71217.03  | 45927.54  |
| 55309.47  | 126050.8  | 26772.73  | 28184.4   | 101353.1  | 43308.88  | 92038.91  | 27126.34  | 46892.37  | 38735.38  |
| 70392.09  | 113056.9  | 28800.67  | 30866.16  | 87941.71  | 61630.46  | 114011.9  | 21135.02  | 43301.35  | 44724.22  |

|           |           |           |           |           |           |           |           |           |           |
|-----------|-----------|-----------|-----------|-----------|-----------|-----------|-----------|-----------|-----------|
| LN326.988 | LN327.830 | LN328.826 | LN328.903 |
| 35840.77  | 23902.84  | 24676.8   | 74582.8   | 90592.38  | 38036.52  | 39930.96  | 32315.94  | 104791.6  | 55968.26  |
| 24892.06  | 21986.43  | 24001.59  | 72474.67  | 146386.7  | 49628.09  | 40914.14  | 26922.4   | 110579.8  | 45753.61  |
| 25522.83  | 25129.06  | 24770.88  | 99267.13  | 89234.74  | 43759.05  | 44464.75  | 29838.74  | 127509.3  | 43997.47  |
| 16962.41  | 17760.1   | 22291.09  | 85616.23  | 89507.89  | 49171.99  | 33704.59  | 36745.27  | 141456.5  | 43252.33  |
| 21290.12  | 20404.37  | 20246.62  | 72837.07  | 115489.5  | 51505.82  | 40931.11  | 37985.32  | 159196.1  | 45402.38  |



|           |           |           |           |           |           |           |           |           |           |
|-----------|-----------|-----------|-----------|-----------|-----------|-----------|-----------|-----------|-----------|
| LN329.269 | LN329.270 | LN329.27_ | LN329.27_ | LN329.828 | LN330.273 | LN330.806 | LN330.826 | LN330.899 | LN330.899 |
| 88110.8   | 14326.42  | 18615.65  | 14362.48  | 8702.878  | 12807.4   | 24338.26  | 31008.37  | 21858.53  | 26013.88  |
| 75069.92  | 14263.85  | 15626.83  | 14453.5   | 6499.677  | 11872.92  | 21807.07  | 24790.38  | 20568.23  | 24929.24  |
| 76385.92  | 15949.04  | 19732.36  | 15948.75  | 7650.121  | 11801.47  | 19561.54  | 26166.09  | 21529.33  | 20333.12  |
| 86614.59  | 18120.43  | 24037.61  | 21652.44  | 11334.63  | 11371.42  | 24470.14  | 25658.73  | 20044.84  | 25771.86  |
| 87610.44  | 19373.48  | 27193.56  | 17817.4   | 10816.53  | 13383.46  | 26464.64  | 40228.67  | 19345     | 26026.36  |

|           |           |           |           |           |           |           |           |           |           |
|-----------|-----------|-----------|-----------|-----------|-----------|-----------|-----------|-----------|-----------|
| LN330.899 |
| 23521.17  | 22676.07  | 18812.01  | 15083.21  | 19752.78  | 19184.31  | 16959.87  | 31784.06  | 24757.21  | 29414.87  |
| 25239.62  | 23445.3   | 17996.5   | 13225.97  | 20461.48  | 18007.38  | 18924.28  | 30719.4   | 24538.05  | 26305.51  |
| 24967.72  | 21364.87  | 17002.11  | 13992.2   | 17380.8   | 17613.27  | 15270.06  | 29537.76  | 22119.37  | 26010.48  |
| 22784.31  | 21513.36  | 16532.91  | 13723.42  | 17575.77  | 15020.95  | 18472.61  | 31246.53  | 20794.35  | 26810     |
| 24872.91  | 21210.81  | 16299.14  | 15146.22  | 20940.53  | 17737.41  | 13639.48  | 29607.21  | 22661.25  | 28224.33  |

|           |           |           |           |           |           |           |           |           |           |
|-----------|-----------|-----------|-----------|-----------|-----------|-----------|-----------|-----------|-----------|
| LN330.899 | LN330.899 | LN330.899 | LN330.899 | LN331.176 | LN331.176 | LN331.176 | LN331.176 | LN331.175 | LN331.176 |
| 14632.65  | 14877.07  | 17937.16  | 14237.81  | 19281.6   | 24234.08  | 18548.35  | 29943.87  | 12714.71  | 28129.44  |
| 13999.36  | 13064.41  | 15629.86  | 14666.82  | 16928.76  | 24768.3   | 16753.42  | 26482.55  | 15386.15  | 27180.01  |
| 12865.79  | 13846.69  | 16958.89  | 14685.18  | 18220.8   | 24163.97  | 17801.9   | 30004.53  | 16196.95  | 28505.08  |
| 12794.25  | 12988.58  | 14362.57  | 14072.39  | 17073.53  | 26329.38  | 18160.71  | 30246.4   | 11740.95  | 25916.69  |
| 12967.43  | 14799.99  | 15994.14  | 14670.92  | 15530.19  | 25090.48  | 19478.59  | 33008.43  | 15594.98  | 26353.93  |

|           |           |           |           |           |           |           |           |           |           |
|-----------|-----------|-----------|-----------|-----------|-----------|-----------|-----------|-----------|-----------|
| LN331.176 | LN331.176 | LN332.868 | LN332.997 | LN332.997 | LN332.997 | LN332.997 | LN332.997 | LN332.998 | LN332.997 |
| 21910.77  | 24075.64  | 15961.81  | 14990.13  | 44501.3   | 36807.1   | 61090.99  | 77996.57  | 25929.94  | 91933.42  |
| 24268.81  | 25598.75  | 13756.27  | 13170.22  | 59423.03  | 42491.15  | 66822.99  | 63855.11  | 17620.68  | 69141.86  |
| 21060.95  | 21771.15  | 13272.81  | 13798.91  | 59584.97  | 34826.45  | 100110.1  | 58570.29  | 21836.17  | 92898.37  |
| 21682.37  | 25076.51  | 15767.87  | 10943.78  | 44474.42  | 39132.21  | 69634.59  | 50724.14  | 22922.9   | 67034.08  |
| 24564.52  | 29017.16  | 19287     | 15189.93  | 54656.32  | 39111     | 71188.8   | 57774.2   | 20512.79  | 67298.51  |

|           |           |           |           |           |           |           |           |           |           |
|-----------|-----------|-----------|-----------|-----------|-----------|-----------|-----------|-----------|-----------|
| LN332.998 | LN332.998 | LN332.998 | LN332.997 | LN332.998 | LN332.997 | LN332.997 | LN332.997 | LN332.998 | LN332.997 |
| 16909.92  | 18949.26  | 37485.61  | 64355.6   | 24787.24  | 43756.99  | 54165.32  | 124251.4  | 33924.61  | 89848.62  |
| 11227.29  | 15829.55  | 37875.24  | 57691.7   | 21435.75  | 68007.44  | 54243.69  | 75996.27  | 29078.92  | 95643.9   |
| 10155.92  | 16527.82  | 52652.07  | 58640.05  | 33276.16  | 41844.88  | 42047.49  | 86424.28  | 44029.81  | 109856.9  |
| 13349.68  | 18391.57  | 41929.7   | 49247.25  | 21114.8   | 52889.18  | 51944.96  | 89050.02  | 24766.47  | 86377.67  |
| 11720.98  | 18042.12  | 43365.48  | 53457.46  | 23026.56  | 51937.25  | 48490.3   | 90736.31  | 27620.54  | 87758.67  |

|           |           |           |           |           |           |           |           |           |           |
|-----------|-----------|-----------|-----------|-----------|-----------|-----------|-----------|-----------|-----------|
| LN332.997 | LN332.997 | LN332.997 | LN332.998 | LN332.998 | LN332.998 | LN332.997 | LN332.998 | LN332.997 | LN332.997 |
| 70602.05  | 47400.45  | 67512.22  | 39689.12  | 30414.93  | 42462.63  | 86611.37  | 28951.44  | 85574.87  | 50108.84  |
| 37789.15  | 41099.55  | 73994.18  | 49319.12  | 36099.04  | 53963.63  | 58708.28  | 48349.88  | 60567.79  | 43301.35  |
| 54271.3   | 31439.85  | 90692.2   | 43667.72  | 30309.79  | 34297.44  | 91748.57  | 47568.81  | 71463.18  | 52261.93  |
| 52967.73  | 51606.73  | 90136.14  | 43069.71  | 33175.91  | 44275.28  | 62867.03  | 38930.83  | 66961.74  | 48161.25  |
| 51430.78  | 48886.23  | 82313.78  | 42212.27  | 32284.46  | 43543.21  | 61087.35  | 39212.72  | 60205.11  | 52736.45  |

|           |           |           |           |           |           |           |           |           |           |
|-----------|-----------|-----------|-----------|-----------|-----------|-----------|-----------|-----------|-----------|
| LN332.998 | LN332.997 | LN332.998 | LN332.997 | LN332.997 | LN332.998 | LN332.997 | LN332.998 | LN332.998 | LN332.998 |
| 42731.79  | 45846.17  | 39494.71  | 60421.74  | 79834.77  | 38516.79  | 52335.81  | 51715.29  | 27307.4   | 24586.51  |
| 29100.21  | 42464.84  | 40080.24  | 76276.97  | 91297.74  | 36929.56  | 40764.28  | 45273.61  | 31902.55  | 23257.74  |
| 43888.75  | 44846.7   | 51276.35  | 41633.23  | 55366     | 45804.71  | 58086.91  | 46101.91  | 43539.07  | 17744.24  |
| 29375.05  | 34772.24  | 42023.64  | 54603.87  | 60687.28  | 48488.81  | 55627.04  | 35327.53  | 37667.18  | 22423.04  |
| 30998.39  | 34709.12  | 39168.91  | 52083.23  | 57918.95  | 45843.81  | 58509.87  | 34668.81  | 33918.98  | 20831.79  |

|           |           |           |           |           |           |           |           |           |           |
|-----------|-----------|-----------|-----------|-----------|-----------|-----------|-----------|-----------|-----------|
| LN332.997 | LN332.998 | LN332.998 | LN332.997 | LN332.998 | LN332.998 | LN332.998 | LN332.998 | LN332.997 | LN332.998 |
| 64296.52  | 37289.27  | 25899.17  | 50067.25  | 23459.53  | 31348.63  | 22323.18  | 25139.17  | 68160.12  | 28804.46  |
| 70925.87  | 49101.28  | 32690.73  | 47155.56  | 25879.28  | 24352.89  | 26571.46  | 47333.76  | 58755.58  | 25021.15  |
| 64402.56  | 42086.45  | 44609.69  | 46002.67  | 16244.26  | 25778.25  | 17877.68  | 22409.68  | 61836.81  | 32153.92  |
| 70534.78  | 36074.9   | 30292.55  | 48297.39  | 19439.04  | 24221.16  | 20448.15  | 33190.61  | 51549.94  | 27842.75  |
| 68021.05  | 41242.63  | 29355.56  | 46174.42  | 17004.56  | 22072.01  | 20161.36  | 31985.97  | 41538.15  | 27023.59  |



|           |           |           |           |           |           |           |           |           |           |
|-----------|-----------|-----------|-----------|-----------|-----------|-----------|-----------|-----------|-----------|
| LN332.997 | LN332.997 | LN332.997 | LN332.997 | LN332.997 | LN332.998 | LN332.997 | LN332.997 | LN332.997 | LN332.998 |
| 55651.23  | 48192.13  | 42832.97  | 56859.82  | 51854.85  | 47488.95  | 47561.25  | 77780.45  | 54054.45  | 19801.03  |
| 47842.96  | 47707.29  | 63681.56  | 73361.49  | 61116.77  | 55802.26  | 45533.43  | 61430.08  | 51005.08  | 17781.36  |
| 65130.61  | 37921.78  | 74867.35  | 66709.43  | 87236.97  | 60854.72  | 35837.08  | 69962.78  | 56804.12  | 23603.2   |
| 43456.18  | 49950.51  | 56157.76  | 62643.11  | 55248.02  | 50198.22  | 39643.75  | 79551.34  | 61959.66  | 17993.07  |
| 45522.97  | 47856.67  | 56318.84  | 66535.25  | 53645.6   | 38267.74  | 37829.46  | 75968.71  | 56001.01  | 19136.08  |

|           |           |           |           |           |           |           |           |           |           |
|-----------|-----------|-----------|-----------|-----------|-----------|-----------|-----------|-----------|-----------|
| LN332.998 | LN332.998 | LN332.997 | LN332.998 | LN332.998 | LN332.997 | LN332.998 | LN332.998 | LN332.998 | LN332.998 |
| 70328.04  | 64051.33  | 76695.31  | 53500.49  | 31633.53  | 54505.12  | 46569.56  | 40561.16  | 19899.77  | 50132.7   |
| 48839.15  | 38690.09  | 73864.63  | 54183     | 60099.55  | 64878.75  | 64201.6   | 34703.36  | 19723.5   | 54784.24  |
| 58471.12  | 51585.43  | 54987.35  | 75125.73  | 41734.18  | 62841.7   | 50295.49  | 44918.95  | 15321.51  | 53966.81  |
| 49005.91  | 48761.35  | 65908.06  | 59737.06  | 39846.41  | 58270.1   | 55560.81  | 38352.49  | 15894.64  | 54760.42  |
| 48665.68  | 44991.28  | 67735.51  | 52539.24  | 40069.52  | 54088.82  | 57420.22  | 42805.45  | 16281.79  | 48358.67  |

|           |           |           |           |           |           |           |           |           |           |
|-----------|-----------|-----------|-----------|-----------|-----------|-----------|-----------|-----------|-----------|
| LN332.998 | LN332.997 | LN332.998 | LN332.998 |
| 42006.91  | 37760.31  | 43484.22  | 24161.05  | 44288.48  | 32047.91  | 61581.21  | 71591.74  | 39612.16  | 27633.84  |
| 35197.53  | 34676.78  | 43685.78  | 18229.9   | 50832.93  | 28833.88  | 54201.91  | 76837.82  | 31901.69  | 30731.69  |
| 29571.52  | 38679.08  | 27270     | 17074.77  | 41378.85  | 47727.03  | 68125.39  | 49745.02  | 45643.35  | 27870.13  |
| 33859.92  | 27501.38  | 36782.68  | 20720.07  | 38606.34  | 32392.03  | 60502.09  | 74978.79  | 32012.37  | 32181.91  |
| 38265.93  | 30397.11  | 36165.65  | 18673.61  | 32819.08  | 33135.41  | 65148.74  | 78532.44  | 30724.83  | 32671.74  |

|           |           |           |           |           |           |           |           |           |           |
|-----------|-----------|-----------|-----------|-----------|-----------|-----------|-----------|-----------|-----------|
| LN332.998 | LN332.998 | LN332.998 | LN332.998 | LN332.997 | LN332.998 | LN332.998 | LN332.998 | LN333.155 | LN333.155 |
| 31476.53  | 38625.7   | 38508.55  | 37046.14  | 58367.38  | 27904.92  | 22648.41  | 18036.17  | 62887.77  | 40924.41  |
| 31013.68  | 36100.61  | 38055.91  | 73102.4   | 61512.57  | 33931.61  | 21137.6   | 21097.05  | 58091.59  | 42633.98  |
| 40739.22  | 40239.98  | 31228.24  | 65595.48  | 63713.16  | 28003.65  | 20820.36  | 15980.93  | 65077.74  | 45062.84  |
| 33418.47  | 39401.63  | 35472.71  | 46164     | 65167.3   | 31286.24  | 18832.48  | 20831.73  | 58609.11  | 51476.75  |
| 31994.26  | 35424.55  | 31423.57  | 47866.91  | 60225.13  | 30241.31  | 22422.5   | 19742.02  | 57980.47  | 45625.92  |

|           |           |           |           |           |           |           |           |           |           |
|-----------|-----------|-----------|-----------|-----------|-----------|-----------|-----------|-----------|-----------|
| LN333.155 |
| 30195.99  | 70120.22  | 14854.41  | 49091.65  | 43396.63  | 55684.24  | 73794.66  | 49831.88  | 41892.59  | 45120.92  |
| 30695.26  | 32165.66  | 14362.05  | 60871.39  | 31274.08  | 52528.2   | 74474.2   | 52996.49  | 45777.01  | 46249.72  |
| 34518.83  | 40807.97  | 12516.3   | 59430.65  | 39430.61  | 44194.51  | 81743.47  | 62245.04  | 31990.46  | 45851.68  |
| 27808.56  | 35797.41  | 14638.43  | 69408.68  | 29374.6   | 68104.22  | 59676.28  | 48350.76  | 50186.11  | 42622.98  |
| 30056.15  | 40914.77  | 17085.82  | 53656.72  | 31406.48  | 57500.74  | 55266.65  | 41840.05  | 41013.26  | 43041.73  |

|           |           |           |           |           |           |           |           |           |           |
|-----------|-----------|-----------|-----------|-----------|-----------|-----------|-----------|-----------|-----------|
| LN333.155 |
| 61284.76  | 43624.36  | 63696.92  | 48054.1   | 105366.8  | 72454.87  | 66000.8   | 105530.5  | 42327.46  | 41381.63  |
| 54438.02  | 55674.73  | 70095.71  | 84168.36  | 89815.65  | 47299.1   | 57819.17  | 70737.33  | 36510     | 35610.53  |
| 56005.02  | 33863.3   | 79116.95  | 52160.87  | 80214.43  | 65679.72  | 45990.41  | 78261.13  | 32205.46  | 38234.23  |
| 44877.94  | 37118.63  | 60217.56  | 42256.33  | 104298.6  | 66531.74  | 52614.23  | 83564.54  | 45563.73  | 53739.98  |
| 48723.56  | 35070.72  | 60447.1   | 58928.55  | 71195.91  | 51152.85  | 54084.61  | 66853.55  | 42680.37  | 29556.02  |

|           |           |           |           |           |           |           |           |           |           |
|-----------|-----------|-----------|-----------|-----------|-----------|-----------|-----------|-----------|-----------|
| LN333.155 |
| 54624.55  | 51015.34  | 47656.21  | 139355.1  | 27804.83  | 27721.32  | 41500.19  | 29924.63  | 36796.16  | 91219.41  |
| 68451.89  | 68678.5   | 71965.07  | 57205.14  | 28213.69  | 32190.28  | 47828.02  | 25918.81  | 54579.62  | 76593.69  |
| 77554.95  | 72014.98  | 77671.73  | 67992.89  | 27755.5   | 40467.46  | 54651.62  | 18814.57  | 42400.12  | 59508.76  |
| 59203.31  | 71243.23  | 49071.04  | 78684.18  | 34798.43  | 34792.62  | 50549.49  | 28114.67  | 50430.5   | 95100.86  |
| 53703.69  | 54627.78  | 59538.26  | 71824.13  | 25549.42  | 35605.55  | 42540.88  | 29988.22  | 52960.47  | 83470.2   |

|           |           |           |           |           |           |           |           |           |           |
|-----------|-----------|-----------|-----------|-----------|-----------|-----------|-----------|-----------|-----------|
| LN333.155 |
| 64106.86  | 62121.25  | 45766.87  | 33884.49  | 98502.54  | 43595.87  | 57828.16  | 36456.32  | 32480.72  | 47322.45  |
| 38605.26  | 85841.62  | 38193.44  | 41808.7   | 88873.18  | 59002.36  | 51611.6   | 42538.93  | 43715.35  | 50878.26  |
| 49376.25  | 75820.28  | 50107.1   | 45243.05  | 101436.1  | 62980.31  | 61859.96  | 31138.29  | 41230.65  | 47685.17  |
| 53648.64  | 52899.96  | 60880.57  | 55810.74  | 72646.33  | 69184.06  | 68118.87  | 45344.85  | 45953.36  | 42847.43  |
| 41062.58  | 53383.77  | 42025.07  | 34260.37  | 96941.71  | 50820.81  | 57311.27  | 35870.77  | 36843.24  | 53143.78  |



|           |           |           |           |           |           |           |           |           |           |
|-----------|-----------|-----------|-----------|-----------|-----------|-----------|-----------|-----------|-----------|
| LN333.155 |
| 63975.5   | 103057.4  | 94308     | 38738.05  | 93706.21  | 53321.49  | 54226.87  | 71418.64  | 20947.22  | 66115.42  |
| 74434.81  | 78483.96  | 91885     | 61753.59  | 85884.27  | 56439.46  | 46377.19  | 49332.54  | 30662.43  | 78022.72  |
| 50210.35  | 56718.51  | 75095.29  | 43788.51  | 72170.09  | 39705.78  | 42527.29  | 45732.39  | 25530.93  | 41805.62  |
| 84779.55  | 88983.73  | 102010.9  | 39026.81  | 62937.23  | 60760.22  | 45882.04  | 47902.16  | 25306.44  | 51803     |
| 62897.65  | 86061.21  | 83682.67  | 49020.06  | 69991.75  | 52944.56  | 39419.72  | 55410.09  | 21855.89  | 47491.82  |

|           |           |           |           |           |           |           |           |           |           |
|-----------|-----------|-----------|-----------|-----------|-----------|-----------|-----------|-----------|-----------|
| LN333.155 |
| 27826.73  | 47635.79  | 44527.1   | 60110.59  | 42708.56  | 73303.45  | 66356.34  | 56313.52  | 48336.76  | 63592.15  |
| 24990.64  | 42880.81  | 45103.21  | 56698.14  | 49904.24  | 66833.5   | 61880.44  | 59266.64  | 59447.01  | 60585.49  |
| 35283.47  | 38153.81  | 39577.92  | 49040.37  | 35795.86  | 62199.16  | 72071.51  | 40076.52  | 68413     | 54399.29  |
| 25306.14  | 43550.34  | 49384.45  | 52730.81  | 55221.26  | 56831.56  | 71597.88  | 38445.55  | 68928.37  | 69630.19  |
| 25635.76  | 40941.06  | 41383.72  | 44763.6   | 39245.74  | 64169.86  | 58978.58  | 40933.82  | 46424.14  | 58970.69  |

|           |           |           |           |           |           |           |           |           |           |
|-----------|-----------|-----------|-----------|-----------|-----------|-----------|-----------|-----------|-----------|
| LN333.155 |
| 42272.23  | 51464.07  | 36353.28  | 31642.67  | 70366.21  | 22044.43  | 30100.52  | 42286.71  | 45592.35  | 57128.23  |
| 28142.86  | 71720.74  | 35307.96  | 28668.16  | 68326.38  | 20310.41  | 36604.82  | 47406.48  | 43725.4   | 56704.92  |
| 51582.15  | 64417.92  | 40194.97  | 33648.18  | 56766.45  | 21265.03  | 34899.15  | 33849.92  | 30235.22  | 52429.13  |
| 33997.61  | 48376.59  | 40804.18  | 28668.81  | 56232.06  | 20826.39  | 27742.38  | 37457.75  | 42839.82  | 55935.34  |
| 31516.88  | 48862.58  | 37775.77  | 29170.87  | 71536.23  | 25084.77  | 31668.66  | 39876.67  | 39791.05  | 57357.74  |

|           |           |           |           |           |           |           |           |           |           |
|-----------|-----------|-----------|-----------|-----------|-----------|-----------|-----------|-----------|-----------|
| LN333.155 | LN333.866 | LN333.894 | LN333.895 |
| 38672.8   | 58916.78  | 77135.09  | 20279.32  | 40606.44  | 56193.21  | 29029.12  | 19346.92  | 23802.36  | 16054.88  |
| 45825.11  | 51200.93  | 51256.09  | 32547.85  | 44876.15  | 45494.5   | 24480.73  | 17697.85  | 25193.3   | 15049.38  |
| 47872.93  | 54491.95  | 63824.01  | 27850.44  | 36028.95  | 69889.89  | 32800.89  | 18062.61  | 24886.91  | 13937.04  |
| 42092.01  | 69869.03  | 58860.29  | 21038.29  | 51411.7   | 38218.02  | 25851.95  | 22493.09  | 23451.99  | 15565.31  |
| 43636.06  | 56203.32  | 63177.9   | 25480.8   | 43323.04  | 41068.36  | 23165.17  | 26086.58  | 18440.24  | 15022.64  |

|           |           |           |           |           |           |           |           |           |           |
|-----------|-----------|-----------|-----------|-----------|-----------|-----------|-----------|-----------|-----------|
| LN333.937 | LN333.937 | LN333.938 | LN333.938 | LN334.863 | LN335.134 | LN335.134 | LN335.134 | LN335.170 | LN335.170 |
| 65629.39  | 66601.04  | 63985.15  | 53248.81  | 452499.1  | 23210.11  | 25831.04  | 16708.86  | 18740.74  | 19956.27  |
| 76594.39  | 69021.31  | 53865.54  | 57160.44  | 418500.4  | 18238.99  | 28888.51  | 18156.23  | 22152.54  | 21523.85  |
| 72780.63  | 66562.87  | 55327.52  | 49324.13  | 470331    | 22135.44  | 26631.17  | 17414.49  | 18933.72  | 19696.05  |
| 68622.64  | 65526.3   | 51058.3   | 47253.88  | 528269.4  | 21090.33  | 27499.12  | 16486.32  | 15560.29  | 21207.74  |
| 65527.83  | 79876.86  | 49842.09  | 49888.7   | 644497.1  | 21703.28  | 26672.7   | 14371.94  | 18600.21  | 19731.24  |

|           |           |           |           |           |           |           |           |           |           |
|-----------|-----------|-----------|-----------|-----------|-----------|-----------|-----------|-----------|-----------|
| LN335.170 |
| 18646.61  | 17218.43  | 19540.49  | 15538.17  | 17034.98  | 20117.64  | 14242.43  | 25136.26  | 17924.25  | 16305.51  |
| 17893.56  | 16620.16  | 19785.62  | 17288.58  | 15847.12  | 21163.99  | 14859.37  | 24757.59  | 19186.49  | 17132.74  |
| 17062.68  | 18206.72  | 19328.54  | 19457.44  | 16699.88  | 18321.06  | 13106.62  | 23032.39  | 17910.69  | 13561.35  |
| 19565.35  | 19034     | 15544.71  | 16186.83  | 15794.84  | 17961.25  | 15425.21  | 24602.92  | 16637.74  | 15760.83  |
| 24336.72  | 14840.22  | 18943.47  | 17619.27  | 15516.44  | 18121.23  | 13508.71  | 22777.26  | 15165.32  | 14549.52  |

|           |           |           |           |           |           |           |           |           |           |
|-----------|-----------|-----------|-----------|-----------|-----------|-----------|-----------|-----------|-----------|
| LN335.170 | LN335.170 | LN335.170 | LN335.861 | LN336.858 | LN336.931 | LN336.972 | LN336.972 | LN336.972 | LN336.972 |
| 23352.64  | 20642.73  | 11948.31  | 394509.1  | 4195595   | 26767.22  | 33852.05  | 60640.01  | 70471.76  | 50995.02  |
| 22394.65  | 20944.66  | 14817.16  | 363314.4  | 3447392   | 26503.34  | 33902.69  | 61644.41  | 73431.31  | 53069.26  |
| 24742.16  | 18933.04  | 12131.06  | 350237.9  | 3742906   | 26526.29  | 34397.21  | 56344.81  | 71804.62  | 49686.44  |
| 24632.95  | 19348.83  | 12176.8   | 422603.1  | 4467628   | 26648.75  | 16610.47  | 54203.27  | 75847.28  | 50382.33  |
| 20834.34  | 20766.78  | 11357.85  | 512083.7  | 5340806   | 27008.18  | 35821.85  | 62645.21  | 71279.83  | 47099.31  |

|           |           |           |           |           |           |           |           |           |           |
|-----------|-----------|-----------|-----------|-----------|-----------|-----------|-----------|-----------|-----------|
| LN336.973 | LN336.992 |
| 26894.09  | 36768.31  | 29775.25  | 35226.53  | 38569.02  | 35524.91  | 72803.3   | 34034.75  | 34748.02  | 38197.88  |
| 25202.57  | 42078.83  | 29719.31  | 36508.3   | 37297.89  | 40189.42  | 76561.2   | 32935.7   | 35520.67  | 34411.25  |
| 26823.84  | 36555.88  | 26402.43  | 35195.88  | 33060.78  | 41433.31  | 72790.55  | 31059.11  | 34969.46  | 35886.14  |
| 27569.24  | 38369.42  | 27097.61  | 32321.72  | 37727.09  | 41747.98  | 70846.18  | 33646.66  | 33763.73  | 35716.69  |
| 22975.3   | 38785.72  | 27152.92  | 31171.69  | 36911.06  | 34015.89  | 68695.86  | 34297.37  | 37655.19  | 39881.13  |



|           |           |           |           |           |           |           |           |           |           |
|-----------|-----------|-----------|-----------|-----------|-----------|-----------|-----------|-----------|-----------|
| LN336.992 |
| 18938.76  | 23144.4   | 19129.22  | 23524.23  | 38392.89  | 21533.34  | 32006.05  | 21993.13  | 25120.07  | 18766.71  |
| 21117.79  | 23317.58  | 15900.28  | 25337.26  | 33025.64  | 20651.7   | 31453.65  | 21410.27  | 22525.93  | 20972.43  |
| 19761.22  | 23699.15  | 17403.9   | 24510.58  | 35228.3   | 21521.97  | 31731.8   | 18549.15  | 24878.01  | 21295.44  |
| 20882.8   | 23285.31  | 17696.02  | 24271.14  | 34732.8   | 21113.67  | 30460.3   | 18270.31  | 23322.28  | 19686.84  |
| 21557.35  | 23896.11  | 16348     | 22316.15  | 35260.26  | 20958.05  | 27315.07  | 19096.21  | 19218.99  | 22309.75  |

|           |           |           |           |           |           |           |           |           |           |
|-----------|-----------|-----------|-----------|-----------|-----------|-----------|-----------|-----------|-----------|
| LN336.992 |
| 27794.04  | 48495.37  | 35284.8   | 17459.77  | 40964.09  | 12248.78  | 37904.57  | 42206.1   | 56833.86  | 13290.28  |
| 28402.52  | 56308.68  | 36535.58  | 16166.94  | 41657.85  | 14179.69  | 36917.13  | 45558.78  | 57949.02  | 12653.14  |
| 28462.03  | 50740.84  | 33920.11  | 16290.92  | 39416.19  | 12419.9   | 33963.3   | 41602.12  | 63094.1   | 11089.98  |
| 27423.14  | 51991.2   | 40354.67  | 14776.77  | 40250.85  | 12788.39  | 40542.81  | 49232.8   | 58776.94  | 11696.63  |
| 29032.87  | 53366.97  | 32940.38  | 15394.87  | 37386.69  | 12305.61  | 34179.38  | 42716.84  | 63171.01  | 12991.86  |

|           |           |           |           |           |           |           |           |           |           |
|-----------|-----------|-----------|-----------|-----------|-----------|-----------|-----------|-----------|-----------|
| LN336.992 |
| 38720.95  | 32118.42  | 15923.52  | 44601.67  | 24918.76  | 33039.72  | 19750.95  | 14729.52  | 17288.82  | 20849.69  |
| 41065.84  | 31830.38  | 14440.44  | 39765.7   | 26474.45  | 34951.36  | 18371.12  | 18194.34  | 20080.73  | 22684.1   |
| 41013.8   | 30268.99  | 16232.38  | 43000.76  | 23699.76  | 29417.8   | 17967.22  | 13179.13  | 19231.23  | 20073.09  |
| 40785.98  | 31917     | 15012.62  | 44950.84  | 22681.03  | 33607.1   | 20092.04  | 16882.11  | 20265.49  | 19739.95  |
| 36651.56  | 34374.77  | 15197.83  | 43033.02  | 28153.45  | 29625.98  | 20448.88  | 15680.78  | 17452.4   | 20904.42  |

|           |           |           |           |           |           |           |           |           |           |
|-----------|-----------|-----------|-----------|-----------|-----------|-----------|-----------|-----------|-----------|
| LN336.992 |
| 28760.17  | 32635.63  | 33738.03  | 34560.54  | 26112.88  | 24511.1   | 29975.53  | 41001.55  | 17070.88  | 37104.44  |
| 31633.32  | 32585.84  | 31770.6   | 32025.36  | 25774.86  | 25475.16  | 28404.77  | 42214.13  | 17786.61  | 35237.57  |
| 27713.01  | 30509.51  | 31832.95  | 33994.13  | 25270.44  | 21545.18  | 31989.9   | 39536.22  | 15539.77  | 37280.24  |
| 27542.37  | 28394.97  | 32604.57  | 32967.3   | 24415.84  | 24822.95  | 30517.97  | 41744.15  | 17033.29  | 34012.31  |
| 26203.04  | 29973.82  | 31014.5   | 31710.4   | 24363.15  | 21363.63  | 26454.55  | 39331.93  | 17697.24  | 35788.31  |

|           |           |           |           |           |           |           |           |           |           |
|-----------|-----------|-----------|-----------|-----------|-----------|-----------|-----------|-----------|-----------|
| LN336.992 |
| 57004.5   | 22940.48  | 43165.92  | 25699.89  | 24060.58  | 50180.65  | 20215.19  | 28852.32  | 25374.77  | 47265.12  |
| 65392.76  | 24680.56  | 41306.95  | 23887.36  | 21601.09  | 46113.81  | 18125.04  | 28130.76  | 24425.41  | 45349.55  |
| 53014.23  | 21483.75  | 39661.73  | 24395.72  | 26562.24  | 46986.61  | 20003.13  | 27650.05  | 25771.86  | 40266.39  |
| 58745.67  | 23453.1   | 36622.79  | 22342.85  | 24416.24  | 46507.82  | 18349.24  | 26212.47  | 24454.19  | 42259.77  |
| 56805.74  | 24384.15  | 46584.72  | 23731.59  | 23859.14  | 50486.62  | 15182.98  | 33552.13  | 26208.63  | 47953.87  |

|           |           |           |           |           |           |           |           |           |           |
|-----------|-----------|-----------|-----------|-----------|-----------|-----------|-----------|-----------|-----------|
| LN336.992 |
| 36385.18  | 14259.75  | 14728.31  | 26456.9   | 33487.88  | 29927.5   | 23771.21  | 11776.74  | 33326.11  | 25577.78  |
| 37796.38  | 12363.62  | 11937.39  | 26582.97  | 34512.5   | 30665.99  | 24593.26  | 17084.82  | 35725.09  | 27210.45  |
| 33993.74  | 13316.11  | 13537.23  | 25265     | 36503.1   | 29809.05  | 24083.44  | 13239.92  | 35346.73  | 28782.66  |
| 33284.5   | 12677.15  | 10311     | 30551.84  | 34954.72  | 30261.42  | 26266.09  | 12966.72  | 33626.59  | 27563.22  |
| 37211.46  | 12937.25  | 12316.75  | 25628.33  | 35988.05  | 28494.84  | 25722.95  | 14164.22  | 30122.84  | 27012.56  |

|           |           |           |           |           |           |           |           |           |           |
|-----------|-----------|-----------|-----------|-----------|-----------|-----------|-----------|-----------|-----------|
| LN336.992 |
| 34634.06  | 36727.25  | 46689.46  | 18316.06  | 24899.13  | 25516.45  | 16486.83  | 35881.14  | 28124.96  | 32952.89  |
| 32443.97  | 34736.79  | 45232.98  | 18809.47  | 23596.54  | 27795.38  | 14555.35  | 32997.2   | 27206.85  | 33365.68  |
| 33372.6   | 36108.68  | 44990.17  | 19380.58  | 22506.02  | 25556.75  | 13735.79  | 31851.22  | 28926.99  | 36927.71  |
| 31210.24  | 38436.65  | 47834.31  | 18575.13  | 20999.26  | 25202.8   | 17282     | 33483.2   | 26722.3   | 35371.04  |
| 32626.73  | 34466.76  | 42806.78  | 16736.91  | 21916.93  | 25621.45  | 13970.76  | 35743.06  | 27712.8   | 33431.21  |

|           |           |           |           |           |           |           |           |           |           |
|-----------|-----------|-----------|-----------|-----------|-----------|-----------|-----------|-----------|-----------|
| LN336.992 |
| 28705.34  | 25516.29  | 23222.61  | 29837.25  | 38966.1   | 43916.36  | 46027.8   | 38249.37  | 33097.5   | 21901.45  |
| 27842.88  | 23990.52  | 22007.5   | 29814.62  | 39262.82  | 51341.61  | 47148.67  | 39762.25  | 37430.7   | 19849.38  |
| 27442.98  | 24260.89  | 23410.03  | 28307.82  | 41822.71  | 50441.36  | 41580.1   | 39381.2   | 35092.3   | 20733.02  |
| 26838.21  | 24917.81  | 20619.23  | 32209.88  | 40505.94  | 46822.9   | 42698.61  | 39490.58  | 33981.57  | 21380.8   |
| 28106.72  | 25083.21  | 19567     | 28308.54  | 39599.64  | 44898.35  | 40254.61  | 43603.48  | 34489.73  | 21423.56  |



|           |           |           |           |           |           |           |           |           |           |
|-----------|-----------|-----------|-----------|-----------|-----------|-----------|-----------|-----------|-----------|
| LN336.992 | LN336.993 | LN336.992 | LN336.993 | LN336.993 | LN336.993 | LN336.993 | LN336.992 | LN338.858 | LN338.988 |
| 25101.02  | 19503.19  | 42298.06  | 31325.18  | 32794.14  | 25699.42  | 29581     | 31458.93  | 1153118   | 39925.45  |
| 20648.9   | 20436.43  | 43093.12  | 32492.71  | 30100.79  | 27138.61  | 27531.89  | 31251.74  | 984595.9  | 39120.9   |
| 23996.84  | 19134.22  | 39755.07  | 31297.27  | 32701.34  | 25409.64  | 30225.9   | 31733.99  | 1079448   | 43375.15  |
| 24869.5   | 18451.38  | 44330.96  | 35026.21  | 34253.45  | 26710.95  | 29893.82  | 27942.57  | 1094117   | 41597.67  |
| 22881.92  | 19679.16  | 39375.14  | 29078.66  | 31520.63  | 26313.19  | 29004.49  | 31001.37  | 1292062   | 39290.15  |

|           |           |           |           |           |           |           |           |           |           |
|-----------|-----------|-----------|-----------|-----------|-----------|-----------|-----------|-----------|-----------|
| LN338.988 | LN338.989 |
| 24407.36  | 23624.06  | 56179.4   | 53178.45  | 34559.84  | 15012.69  | 36131.76  | 20873.84  | 22659.04  | 21131.32  |
| 26352.87  | 25291.38  | 55042.91  | 56930.38  | 34680.65  | 11953.66  | 41138.17  | 22424.55  | 23752.74  | 17778.9   |
| 20173.11  | 23666.18  | 49497.46  | 29088.31  | 33230.28  | 12191.75  | 38188.77  | 24181.17  | 21473.28  | 23584.43  |
| 26137.36  | 23038.11  | 58925.71  | 52696.3   | 31882.05  | 14292.56  | 41667.5   | 25166.98  | 23018.73  | 17894.63  |
| 25226.21  | 26253.89  | 57547.91  | 56217.11  | 36244.94  | 13021.24  | 43738.9   | 22490.49  | 24748.52  | 18718.18  |

|           |           |           |           |           |           |           |           |           |           |
|-----------|-----------|-----------|-----------|-----------|-----------|-----------|-----------|-----------|-----------|
| LN338.988 |
| 44092.83  | 29374.4   | 47333.55  | 60001.41  | 35740.97  | 45247.65  | 34235.85  | 15058.09  | 28105.68  | 20696.68  |
| 47774.67  | 29162.44  | 46463.4   | 53612.63  | 38671.37  | 46269.06  | 35395.18  | 16243.42  | 29850.76  | 19999.48  |
| 43793.99  | 43125.2   | 53329.32  | 64989.54  | 50183.06  | 39997.8   | 36932.27  | 16214.5   | 34105.94  | 18241.62  |
| 45814.12  | 29332.17  | 52318.55  | 52469.77  | 33503.95  | 44520.35  | 34224.54  | 14549.55  | 29402.67  | 19352.45  |
| 47060.34  | 30813.36  | 47033.42  | 55162.9   | 32619.49  | 49854.48  | 33634.14  | 14818.2   | 31289.21  | 19331.59  |

|           |           |           |           |           |           |           |           |           |           |
|-----------|-----------|-----------|-----------|-----------|-----------|-----------|-----------|-----------|-----------|
| LN338.988 | LN338.989 | LN338.988 | LN338.988 |
| 43996.87  | 42510.13  | 41237.01  | 44519.51  | 44050.18  | 23817.52  | 39806.88  | 16053.51  | 41662.65  | 25293.24  |
| 41441.07  | 39851.22  | 45274.76  | 44176.05  | 47534.08  | 23281.08  | 41527.46  | 15339.16  | 40464.6   | 23905.41  |
| 43635.32  | 44086.71  | 59083.47  | 48778.91  | 45766.91  | 20853.6   | 33502.79  | 11818.08  | 41337.49  | 36884.96  |
| 41918.66  | 42656.57  | 43483.17  | 47998.85  | 40782.5   | 24827.29  | 42414.81  | 16685.61  | 44046.21  | 26676.32  |
| 42139.03  | 37279.26  | 43218.36  | 44027.02  | 42060.89  | 25823.89  | 43766.08  | 14592.09  | 45705.52  | 30428.24  |

|           |           |           |           |           |           |           |           |           |           |
|-----------|-----------|-----------|-----------|-----------|-----------|-----------|-----------|-----------|-----------|
| LN338.988 | LN338.989 | LN338.988 |
| 14880.85  | 19121.59  | 48656.93  | 36912.85  | 45669.99  | 19742.55  | 38122.35  | 23652.27  | 20897.75  | 43326.87  |
| 12121.95  | 20226.65  | 49473.04  | 41018.37  | 40888.76  | 19055.21  | 39170.94  | 23316.45  | 22456.15  | 39769.42  |
| 11538.83  | 16178.19  | 45079.09  | 51539.62  | 37104.31  | 26740.93  | 37052.88  | 22940.91  | 12932.96  | 40066.56  |
| 15238.83  | 17739.14  | 47602.04  | 40925.12  | 41873.01  | 18798.53  | 41945.64  | 21373.9   | 24389.41  | 40684.37  |
| 11557.92  | 17612.78  | 52102.64  | 38253.09  | 39242.06  | 18764.49  | 43558.32  | 23575.63  | 19307     | 42427.71  |

|           |           |           |           |           |           |           |           |           |           |
|-----------|-----------|-----------|-----------|-----------|-----------|-----------|-----------|-----------|-----------|
| LN338.988 |
| 68106.3   | 40292.2   | 33197.42  | 24195.62  | 38588.54  | 43704.74  | 53095.7   | 56309.47  | 53180.84  | 57253.73  |
| 59454.48  | 38497.59  | 30883.85  | 23361.98  | 38530.53  | 47799.69  | 50344.64  | 57799     | 53695.06  | 55731.02  |
| 68707.11  | 44136.97  | 36759.55  | 25720.72  | 25980.64  | 36426.54  | 51285.81  | 57441.19  | 41112.47  | 53702.09  |
| 62512.16  | 44126.44  | 29848.5   | 24540     | 37829.44  | 43192.52  | 57710.54  | 60826     | 53025.66  | 55730.17  |
| 62994.76  | 41874.47  | 29993.66  | 23834.82  | 34628.66  | 40084.3   | 58279.63  | 56201.66  | 57705.72  | 54255.82  |

|           |           |           |           |           |           |           |           |           |           |
|-----------|-----------|-----------|-----------|-----------|-----------|-----------|-----------|-----------|-----------|
| LN338.988 |
| 41015.17  | 65219.33  | 29767.73  | 36282.39  | 35449.95  | 31948.59  | 17125.05  | 33865.32  | 27223.66  | 52775     |
| 42635.91  | 67243.97  | 35600.71  | 37631.7   | 32271.47  | 32734.26  | 19238.62  | 31250.64  | 25414.48  | 56774.91  |
| 38055     | 80958.48  | 36892.07  | 35904.16  | 32750.35  | 32492.6   | 19853.05  | 35049.81  | 24803.55  | 84902.94  |
| 45462.12  | 68435.44  | 35317.08  | 35829.64  | 33046.76  | 32864.77  | 18690.85  | 32867.05  | 23682.13  | 54221.47  |
| 44038.62  | 65205.79  | 36910.2   | 37247.88  | 32427.1   | 32722.25  | 17293.89  | 31795.52  | 25429.98  | 59390.13  |

|           |           |           |           |           |           |           |           |           |           |
|-----------|-----------|-----------|-----------|-----------|-----------|-----------|-----------|-----------|-----------|
| LN338.988 |
| 18142.04  | 47397.17  | 51874.85  | 31064.49  | 25309.57  | 26817.76  | 47191.9   | 24894.13  | 27434.56  | 82000.93  |
| 19312.7   | 46978.82  | 49100.88  | 31251.06  | 31659.17  | 25903.91  | 50591.78  | 24278.45  | 31989.54  | 80924.84  |
| 21073.59  | 45673.46  | 45365.36  | 35217.27  | 27071.38  | 24834.88  | 44342.4   | 19581.29  | 26178.45  | 66565.05  |
| 20673.23  | 47927.56  | 45379.41  | 34728.71  | 28092.02  | 24252.47  | 45614.38  | 24084.03  | 28932.11  | 75756.13  |
| 18262.95  | 46692.88  | 47599.06  | 34158.61  | 28456.46  | 26325.86  | 43595.32  | 21129.61  | 25281.69  | 73956.99  |



|           |           |           |           |           |           |           |           |           |           |
|-----------|-----------|-----------|-----------|-----------|-----------|-----------|-----------|-----------|-----------|
| LN338.988 | LN338.988 | LN338.988 | LN338.988 | LN338.989 | LN338.988 | LN338.988 | LN338.988 | LN338.988 | LN338.988 |
| 39364.04  | 38800.31  | 28438.08  | 27592.14  | 18209.13  | 70346.4   | 28471.59  | 28712.78  | 26877.71  | 69004.03  |
| 39450.57  | 38313.92  | 28339.9   | 33365.77  | 17658.76  | 67035.42  | 26106.63  | 29602.98  | 26490.33  | 65185.36  |
| 29857.62  | 42167.88  | 47962.13  | 29202.5   | 16220.18  | 65302.48  | 25225.7   | 30390.49  | 27283.6   | 69842.08  |
| 43783.7   | 38666.86  | 29985.98  | 32151.18  | 17327.3   | 65665.36  | 28707.78  | 32246.02  | 26107.32  | 67863.09  |
| 43355.62  | 36693.31  | 26550.26  | 32302.21  | 16739.74  | 64820.79  | 26287.67  | 33263.26  | 28783.01  | 72232.08  |

|           |           |           |           |           |           |           |           |           |           |
|-----------|-----------|-----------|-----------|-----------|-----------|-----------|-----------|-----------|-----------|
| LN338.988 | LN338.988 | LN338.988 | LN338.988 | LN339.199 | LN339.232 | LN339.232 | LN339.232 | LN339.232 | LN339.232 |
| 63988.38  | 31466.61  | 46547.3   | 45721.41  | 64066.9   | 21047.21  | 20547.31  | 17807.64  | 18269.35  | 20652.93  |
| 58630.31  | 28474.82  | 48508.26  | 47074.51  | 58024.51  | 18580.4   | 16895.62  | 19989.58  | 18923.05  | 17095.25  |
| 53193.93  | 31862.87  | 51674.98  | 72157.55  | 68501.27  | 19099.24  | 17886.31  | 18923.84  | 19588.58  | 18750.05  |
| 66736.95  | 29115.69  | 50524.82  | 44699.69  | 73065.43  | 18835.52  | 19503.2   | 17103.22  | 17937.05  | 20485.46  |
| 66938.98  | 31541.87  | 43033.27  | 44322.49  | 77911.14  | 18712.58  | 18409.14  | 16462.74  | 17571.35  | 18069.28  |

|           |           |           |           |           |           |           |           |           |           |
|-----------|-----------|-----------|-----------|-----------|-----------|-----------|-----------|-----------|-----------|
| LN339.233 | LN339.233 | LN339.326 | LN339.858 | LN339.912 | LN339.912 | LN339.912 | LN339.912 | LN339.912 | LN339.912 |
| 15139.72  | 17651.23  | 10332.25  | 68261.77  | 26104.05  | 22974.31  | 22446.48  | 28304.68  | 18008.92  | 21701.75  |
| 15850.33  | 17907.32  | 12044.8   | 67725.4   | 22360.86  | 20753.52  | 26386.47  | 30828.7   | 20458.98  | 27353.54  |
| 15866     | 14775.08  | 12579.14  | 60512.86  | 22029.47  | 25439.75  | 20725.55  | 28202.77  | 19283.21  | 23913.17  |
| 14373.84  | 15490.08  | 14652.95  | 55894.59  | 26580.96  | 22202.73  | 23942.7   | 29611.81  | 18133.54  | 22601.86  |
| 12553.43  | 16293.34  | 14284.13  | 82823.16  | 27437.88  | 22748.17  | 22515.21  | 27702.32  | 20260.51  | 26364.05  |

|           |           |           |           |           |           |           |           |           |           |           |
|-----------|-----------|-----------|-----------|-----------|-----------|-----------|-----------|-----------|-----------|-----------|
| LN339.912 | LN339.911 | LN339.911 | LN339.912 | LN339.912 | LN339.912 | LN339.912 | LN339.912 | LN339.912 | LN340.210 | LN340.853 |
| 40281.64  | 14363.06  | 17194.86  | 22117.86  | 19284.37  | 28115.7   | 22321.68  | 31787.11  | 21363.23  | 419333.9  |           |
| 41448.82  | 13554.65  | 15890.53  | 25838.39  | 20398.95  | 26615.21  | 24063.84  | 29957.55  | 21619.11  | 338826.6  |           |
| 39881.76  | 16354.59  | 14127.38  | 21080.74  | 17191.63  | 27900.61  | 22711.72  | 28830.73  | 22770.81  | 347673.2  |           |
| 34680.77  | 14051.24  | 17581.87  | 25107.44  | 19189.76  | 24365.1   | 23113.05  | 29105.93  | 17250.58  | 350268.7  |           |
| 36053.61  | 12505.07  | 13899.54  | 25177.12  | 18452.64  | 28514.32  | 23547.07  | 27052.84  | 19338.26  | 468165.2  |           |

|           |           |           |           |           |           |           |           |           |           |
|-----------|-----------|-----------|-----------|-----------|-----------|-----------|-----------|-----------|-----------|
| LN340.941 | LN341.004 | LN341.003 | LN341.003 | LN341.004 | LN341.003 | LN341.003 | LN341.003 | LN341.003 | LN341.003 |
| 32800.26  | 91025.36  | 93858.64  | 75305.42  | 47428.74  | 98723.44  | 70593.18  | 75656.48  | 97038.86  | 92356.46  |
| 143000.2  | 59388.55  | 97870.2   | 68793.59  | 62768.51  | 121561.5  | 53866.38  | 85201.08  | 83384.42  | 123247.9  |
| 148956.7  | 68501.85  | 133562.2  | 73117.5   | 72491.08  | 118475    | 80154.49  | 66674.29  | 93622.77  | 116091.3  |
| 151727.1  | 60357.03  | 86961.42  | 64297.19  | 59432.34  | 95776.31  | 66110.87  | 73058.03  | 126544.6  | 98160.02  |
| 11390.57  | 53082.63  | 87536.88  | 109269.5  | 39427.47  | 101658.1  | 71719.53  | 69216.65  | 77346.09  | 69630.04  |

|           |           |           |           |           |           |           |           |           |           |
|-----------|-----------|-----------|-----------|-----------|-----------|-----------|-----------|-----------|-----------|
| LN341.003 | LN341.003 | LN341.003 | LN341.004 | LN341.003 | LN341.004 | LN341.004 | LN341.003 | LN341.004 | LN341.003 |
| 148495.2  | 112528    | 48449.38  | 91233.69  | 24452.77  | 75483.74  | 34514.13  | 126187.3  | 60581.96  | 105779.7  |
| 113983.6  | 152216.1  | 60458.21  | 103854.2  | 19065.44  | 79202.09  | 39339.97  | 131343.8  | 44115.28  | 78969.67  |
| 110011.5  | 99511.56  | 65979.56  | 91146.34  | 14681.09  | 98454.56  | 27208.94  | 126233.6  | 65068.2   | 64102.91  |
| 87793.03  | 117752    | 78124.33  | 109897.2  | 20410.25  | 79332.27  | 30605.11  | 102370.1  | 40408.18  | 83338.31  |
| 104348.6  | 131984.4  | 62240.73  | 102289.5  | 22419.21  | 86998.41  | 30507.92  | 124508    | 52632.35  | 104123.4  |

|           |           |           |           |           |           |           |           |           |           |
|-----------|-----------|-----------|-----------|-----------|-----------|-----------|-----------|-----------|-----------|
| LN341.004 | LN341.004 | LN341.003 | LN341.004 | LN341.004 | LN341.003 | LN341.003 | LN341.003 | LN341.004 | LN341.004 |
| 76994.78  | 109931.5  | 146973.5  | 56539.32  | 61294.44  | 95911.48  | 90035.68  | 117720.6  | 39527.52  | 70541.68  |
| 79550.27  | 108969.5  | 111606.8  | 77133.46  | 60574.75  | 109781.4  | 127749.9  | 92263.82  | 31059.67  | 70102.32  |
| 48348.9   | 88547.41  | 109048.9  | 71882.05  | 52811.32  | 74205.47  | 106637.1  | 91810.64  | 30266.17  | 48093.22  |
| 72296.55  | 80924.07  | 150127.8  | 48035.94  | 55765.11  | 131160.7  | 99178.87  | 103642.3  | 30913.6   | 61299.15  |
| 69592.53  | 85717.89  | 130440.4  | 43872.96  | 76239.87  | 125281.9  | 78656.58  | 86801.63  | 29243.55  | 64426.18  |

| LN341.003 | LN341.004 | LN341.003 | LN341.004 | LN341.004 | LN341.004 | LN341.003 | LN341.004 | LN341.004 | LN341.003 |
|-----------|-----------|-----------|-----------|-----------|-----------|-----------|-----------|-----------|-----------|
| 128422.6  | 92540.06  | 102436.6  | 88805.7   | 49312.92  | 78149.44  | 123483.9  | 57644.56  | 65925.05  | 148382.3  |
| 98288.35  | 60832.44  | 114193.1  | 101321.1  | 46999.42  | 63545.2   | 106591.5  | 53637.45  | 49573.31  | 109357.5  |
| 120208.9  | 61906.31  | 89238.48  | 82470.1   | 53165.56  | 55403.2   | 113326.8  | 88666.43  | 110876.4  | 134137.4  |
| 99437.94  | 75234.71  | 92798.34  | 73446.24  | 40163.97  | 65646.82  | 236678.6  | 84974.24  | 83574.84  | 186403.3  |
| 123453    | 75502.74  | 140079.8  | 76197.23  | 67327.06  | 93685.73  | 158070.7  | 58683.79  | 83112.42  | 131658.6  |



|           |           |           |           |           |           |           |           |           |           |
|-----------|-----------|-----------|-----------|-----------|-----------|-----------|-----------|-----------|-----------|
| LN341.003 | LN341.003 | LN341.004 | LN341.003 | LN341.003 | LN341.004 | LN341.004 | LN341.004 | LN341.004 | LN341.004 |
| 78878.13  | 76697.7   | 33822.01  | 81150.56  | 76987.16  | 33213.85  | 56175.72  | 55159.34  | 57471.33  | 65219.3   |
| 79093.76  | 95646.13  | 53310.92  | 134771.3  | 80726.49  | 28110.28  | 36150.77  | 45674.62  | 42648.16  | 69888.89  |
| 83609.88  | 83285.8   | 42361.7   | 146580.8  | 75120.95  | 29511.64  | 47973.93  | 54449.09  | 46174.57  | 61243.25  |
| 142194.6  | 127847.9  | 47603.47  | 124417.7  | 89736.59  | 21617.02  | 47469.33  | 62825.83  | 71023.27  | 42264.58  |
| 108334.7  | 97566.81  | 44289.14  | 89177.61  | 98071.73  | 32944.61  | 55115.33  | 59512.63  | 56841.71  | 83402.28  |

|           |           |           |           |           |           |           |           |           |           |
|-----------|-----------|-----------|-----------|-----------|-----------|-----------|-----------|-----------|-----------|
| LN341.004 | LN341.004 | LN341.003 | LN341.003 | LN341.003 | LN341.004 | LN341.004 | LN341.003 | LN341.004 | LN341.004 |
| 96848.2   | 64323.98  | 131792.7  | 101143.9  | 97840.34  | 73260.5   | 87206.33  | 121747    | 90252.47  | 29928.47  |
| 115212.3  | 67629.42  | 137009    | 99993.95  | 137475.6  | 73270.71  | 94098.29  | 112765.6  | 73154.54  | 39873.47  |
| 125168.1  | 94441.47  | 132755.5  | 105852.6  | 136790.9  | 80792.89  | 89479.66  | 121612.7  | 89389     | 23442.65  |
| 97098.42  | 71817.59  | 97137.4   | 83248.5   | 97369.53  | 77641.25  | 81014.92  | 135512.1  | 83490.48  | 43506.26  |
| 74673.27  | 79797.9   | 148890.6  | 95414.63  | 95111.84  | 62741.03  | 119279.5  | 89515.07  | 107074.6  | 25633.37  |

|           |           |           |           |           |           |           |           |           |           |
|-----------|-----------|-----------|-----------|-----------|-----------|-----------|-----------|-----------|-----------|
| LN341.004 |
| 66381.09  | 66146.96  | 43586.47  | 33771.82  | 74236.1   | 60866.89  | 88672.92  | 65998.46  | 61875.81  | 66545.84  |
| 90940.42  | 62064.79  | 56697.08  | 30690.59  | 58123.54  | 60817.03  | 66166.27  | 83089.54  | 50162.87  | 49011.9   |
| 72257.95  | 64987.18  | 43991.27  | 42292.78  | 80415.64  | 88663.85  | 76988.91  | 88222.75  | 48047.07  | 59532.53  |
| 64201.84  | 69926.07  | 39358.41  | 34811     | 72903.5   | 54404.05  | 82234     | 63012.73  | 62077.59  | 53651.8   |
| 70513.35  | 61808.02  | 50640.07  | 24957.54  | 50751.25  | 72792.98  | 89233.16  | 72483.53  | 99678.57  | 52096.19  |

|           |           |           |           |           |           |           |           |           |           |
|-----------|-----------|-----------|-----------|-----------|-----------|-----------|-----------|-----------|-----------|
| LN341.004 | LN341.003 | LN341.003 | LN341.004 | LN341.004 | LN341.003 | LN341.003 | LN341.004 | LN341.004 | LN341.004 |
| 47795.07  | 139808.1  | 128826.7  | 32543.95  | 26602.47  | 100317.3  | 57936.54  | 57958.23  | 48968.6   | 42879.7   |
| 40054.03  | 151947.2  | 86102.25  | 29392.43  | 42451.82  | 97557.52  | 52822.86  | 63951.6   | 60308.94  | 34697.76  |
| 66666.36  | 154282.9  | 100462    | 23762.75  | 36902.31  | 116800.3  | 67982.68  | 87452.43  | 44493.93  | 27974.62  |
| 59064.47  | 168378.6  | 86330.7   | 24279.99  | 31484.96  | 110680.6  | 64206.7   | 70163.12  | 51313.4   | 36581.28  |
| 42583.1   | 164384    | 88135.48  | 27333.93  | 38383.91  | 96476.54  | 47904.38  | 69364.13  | 51090.45  | 35634.58  |

|           |           |           |           |           |           |           |           |           |           |
|-----------|-----------|-----------|-----------|-----------|-----------|-----------|-----------|-----------|-----------|
| LN341.004 | LN341.004 | LN341.003 | LN341.004 | LN341.145 | LN341.145 | LN341.145 | LN341.145 | LN341.145 | LN341.145 |
| 37279.3   | 50463.8   | 69088.18  | 37998.99  | 56000.56  | 188619.4  | 182867.9  | 124614.4  | 100131.3  | 151645.1  |
| 33972.59  | 60121.65  | 85525     | 31724.54  | 86899.71  | 193734.7  | 184883.3  | 128088    | 104437.6  | 126631.8  |
| 33368.38  | 58863.14  | 68047.79  | 31989.32  | 61892.55  | 166575.8  | 158831.3  | 122274.4  | 100752.8  | 143019.1  |
| 54886.53  | 76089.27  | 71185.61  | 31637.93  | 72709.94  | 184587.8  | 188412.9  | 127755.8  | 98510.23  | 126125.8  |
| 34472.5   | 54882.19  | 71763.65  | 45998.22  | 68448.82  | 176128.6  | 180193.4  | 109516.9  | 96864.41  | 121964    |

|           |           |           |           |           |           |           |           |           |           |
|-----------|-----------|-----------|-----------|-----------|-----------|-----------|-----------|-----------|-----------|
| LN341.222 | LN341.269 | LN341.269 | LN341.269 | LN341.269 | LN341.270 | LN341.855 | LN342.852 | LN342.890 | LN342.890 |
| 28622.65  | 162651.3  | 207634.1  | 141462.7  | 92246.85  | 159846.4  | 35420     | 102255.6  | 17545.28  | 32191.09  |
| 27240.69  | 265538.9  | 253020    | 140050.4  | 89501.88  | 158609.2  | 28298.78  | 79739.15  | 19919.5   | 29093.64  |
| 34037.73  | 208690.2  | 184840.4  | 143057.8  | 96429.12  | 164881.1  | 27515.38  | 56366.79  | 18559.55  | 25630.75  |
| 27543.57  | 189537.9  | 184852.5  | 133228.7  | 96309.66  | 156479    | 36919.61  | 101986.6  | 15177.4   | 26274.22  |
| 28399.27  | 208522.6  | 199512.8  | 137500.1  | 87834.06  | 160131.7  | 30367.51  | 67881     | 16783.51  | 24433.43  |

|           |           |           |           |           |           |           |           |           |           |
|-----------|-----------|-----------|-----------|-----------|-----------|-----------|-----------|-----------|-----------|
| LN342.890 | LN342.890 | LN342.890 | LN342.890 | LN342.890 | LN343.819 | LN343.893 | LN343.893 | LN343.893 | LN343.893 |
| 20335.92  | 18802.07  | 30745.48  | 33059.57  | 29332.99  | 36633.01  | 20243.53  | 20499.09  | 23429.63  | 17185.18  |
| 20852.67  | 17972.68  | 32291.13  | 28335     | 27496.79  | 32193.31  | 19365.41  | 22277.62  | 19276.86  | 13388.56  |
| 20475.14  | 17632.36  | 33015.17  | 27595.28  | 32076.54  | 37874.9   | 18066.85  | 23845.32  | 19642.21  | 14799.51  |
| 17630.62  | 19684.33  | 34787.18  | 27325.25  | 30070.66  | 44049.91  | 16911.03  | 17716.02  | 18656.5   | 13241.5   |
| 21138.15  | 18621.35  | 32608.04  | 28818.66  | 29062.66  | 46329.33  | 16485.57  | 20133.71  | 20059.84  | 14487.11  |

|           |           |           |           |           |           |           |           |           |           |
|-----------|-----------|-----------|-----------|-----------|-----------|-----------|-----------|-----------|-----------|
| LN343.893 | LN343.893 | LN343.893 | LN343.893 | LN344.851 | LN345.015 | LN345.817 | LN346.177 | LN346.849 | LN346.864 |
| 16491.3   | 22961.97  | 18053.22  | 15127.39  | 38650.19  | 50582.47  | 10973.18  | 20938.54  | 14949.78  | 18556.6   |
| 20433.85  | 20593.84  | 19035.24  | 14145.34  | 44984.57  | 45751.48  | 5952.362  | 20100.67  | 16019.57  | 18060.88  |
| 16462.35  | 20995.26  | 17970.24  | 13945.08  | 43961.39  | 21518.68  | 11795.37  | 18356.01  | 13428.38  | 17317.31  |
| 16444.47  | 20012.47  | 17713.44  | 14606.37  | 35860.43  | 51523.92  | 11079.36  | 18178.03  | 15790.12  | 10620.49  |
| 14424.77  | 19340.79  | 16592.28  | 12792.83  | 34515.27  | 46755.8   | 12153.51  | 18841.72  | 17797.1   | 13975.86  |



|           |           |           |           |           |           |           |           |           |           |
|-----------|-----------|-----------|-----------|-----------|-----------|-----------|-----------|-----------|-----------|
| LN347.013 | LN347.013 | LN347.013 | LN347.013 | LN347.013 | LN347.171 | LN348.859 | LN349.186 | LN349.186 | LN349.186 |
| 40584.83  | 36995.45  | 36197.43  | 31296.51  | 37195.6   | 36324.78  | 139699.1  | 19510.6   | 24708.23  | 25849.38  |
| 40610.74  | 31702.41  | 39486.02  | 32340.19  | 40015.88  | 37044.56  | 90915.93  | 18839.76  | 25727.68  | 23484.15  |
| 43743.02  | 33673.45  | 33411.39  | 31211.47  | 35933.56  | 46568.93  | 130817.7  | 19815.9   | 27257.7   | 25412.44  |
| 36525.46  | 37721.28  | 37239.31  | 31308.07  | 35285.03  | 51082.53  | 162842    | 22211.96  | 29024.25  | 25389.45  |
| 39544.05  | 30919.79  | 38523.65  | 28408.88  | 35103.41  | 53831.52  | 189579.7  | 18978.03  | 26405.35  | 22170.72  |

|           |           |           |           |           |           |           |           |           |           |
|-----------|-----------|-----------|-----------|-----------|-----------|-----------|-----------|-----------|-----------|
| LN349.187 | LN349.187 | LN349.186 | LN349.186 | LN349.186 | LN349.187 | LN349.186 | LN349.186 | LN349.186 | LN349.187 |
| 24152.45  | 25548.69  | 30650.18  | 23012.92  | 21318.72  | 24697.9   | 23353.99  | 24583.37  | 24013.92  | 19417.42  |
| 24280.7   | 24041.78  | 31594.89  | 25928.54  | 21588.33  | 25287.32  | 27555.89  | 25694.32  | 25150.18  | 18981.38  |
| 22201.72  | 23106.74  | 32317.64  | 23419.18  | 23316.72  | 24443.97  | 25997     | 29186.88  | 24151.42  | 20408.26  |
| 22670.04  | 23986.7   | 28093.33  | 24687.17  | 23359.07  | 29050.98  | 25682.04  | 26940.7   | 23975.1   | 19486.37  |
| 21466.06  | 22663.61  | 28532.09  | 23973.28  | 22211.93  | 23659.72  | 24371.49  | 23830.81  | 23709.64  | 19606.87  |

|           |           |           |           |           |           |           |           |           |           |
|-----------|-----------|-----------|-----------|-----------|-----------|-----------|-----------|-----------|-----------|
| LN349.866 | LN349.903 | LN349.945 | LN350.857 | LN350.910 | LN350.987 | LN350.987 | LN350.987 | LN350.987 | LN350.988 |
| 122294.3  | 61681.99  | 18027.75  | 29400.65  | 26936.37  | 118461.8  | 126659.5  | 55241.06  | 86427.19  | 49627.3   |
| 102872    | 51332.67  | 71089.45  | 23900.42  | 27248.12  | 120953.3  | 122096.2  | 56372.72  | 80687.07  | 89153.94  |
| 94820.58  | 52598.68  | 59823.11  | 25645.35  | 30365.6   | 123767.6  | 122806.9  | 59397.35  | 82947.6   | 51760.78  |
| 123325.4  | 61807.42  | 63196.03  | 32514.86  | 33729.81  | 114607.3  | 123670.3  | 58656.4   | 79161.52  | 57863.78  |
| 141061.6  | 54735.7   | 63561.98  | 40725.83  | 47391.01  | 115531.1  | 120014.3  | 63488.73  | 80748.78  | 60013.88  |

|           |           |           |           |           |           |           |           |           |           |
|-----------|-----------|-----------|-----------|-----------|-----------|-----------|-----------|-----------|-----------|
| LN350.988 |
| 19380.42  | 31655.98  | 53340.09  | 137251.4  | 47480.99  | 43679.01  | 54088.51  | 38465.55  | 85883.68  | 35351.76  |
| 19873.64  | 34438.17  | 52142.67  | 96563.31  | 82989.68  | 39380.55  | 40631.65  | 42528.79  | 78333.09  | 39761.77  |
| 19866.18  | 47553.15  | 29414.41  | 104620.5  | 68382.36  | 46880.99  | 42140.8   | 29586.8   | 65131.95  | 45134.63  |
| 20812.57  | 31332.66  | 56127.34  | 108065.2  | 83809.16  | 53420.41  | 43819.36  | 42178.88  | 119294.3  | 41219.52  |
| 24539.84  | 26017.72  | 51977.47  | 121853.3  | 63973.33  | 79702.28  | 40395.79  | 33293.71  | 78961.56  | 45311.19  |

|           |           |           |           |           |           |           |           |           |           |
|-----------|-----------|-----------|-----------|-----------|-----------|-----------|-----------|-----------|-----------|
| LN350.988 |
| 39386.01  | 61644.4   | 49552.06  | 55170.82  | 81208.21  | 79998.44  | 48391.89  | 48410.5   | 40445.67  | 70866.23  |
| 49383.69  | 90317.74  | 34397.28  | 50300.37  | 92552.92  | 75789.97  | 42980.88  | 46172.84  | 48707.63  | 49868.87  |
| 40219.14  | 76868.67  | 63714.22  | 53443.05  | 70660.4   | 57831.89  | 43166.68  | 27863.52  | 48638.86  | 65950.54  |
| 51496.36  | 108933.3  | 37896.8   | 54239.74  | 104891.3  | 68872.81  | 35296.36  | 29145.53  | 44888.59  | 79201.96  |
| 47027.06  | 65832.28  | 72439.91  | 37912.2   | 59105.61  | 58035.72  | 51769.13  | 34107.11  | 36888.2   | 45423.22  |

|           |           |           |           |           |           |           |           |           |           |
|-----------|-----------|-----------|-----------|-----------|-----------|-----------|-----------|-----------|-----------|
| LN350.988 |
| 63660.61  | 57354.22  | 86974.58  | 60598.3   | 66251.88  | 48547.96  | 104284.2  | 69354.8   | 85051.75  | 30086.71  |
| 88972.67  | 59688.06  | 62326.83  | 47253.45  | 97073.8   | 32588.74  | 55826.93  | 70975.22  | 75380.24  | 20610.46  |
| 61508.22  | 48370.48  | 85077.13  | 78422.19  | 81888.08  | 39526.06  | 63660.57  | 79620.58  | 70142.83  | 24339.41  |
| 70130.05  | 61660.64  | 83723.17  | 58373.95  | 105033.8  | 44222.04  | 77524.79  | 77486.82  | 82634.69  | 24286.15  |
| 72315.79  | 53340.47  | 51661.92  | 59740.3   | 86048.34  | 48429.6   | 53277.93  | 59216.62  | 78263.65  | 24380.9   |

|           |           |           |           |           |           |           |           |           |           |
|-----------|-----------|-----------|-----------|-----------|-----------|-----------|-----------|-----------|-----------|
| LN350.988 |
| 24435.82  | 58066.4   | 55293.11  | 49696.06  | 40086.92  | 53654.2   | 25398.84  | 40956.81  | 30419.63  | 72912.1   |
| 23847.2   | 48605.23  | 60961.09  | 64126.38  | 43758.63  | 59368.89  | 43720.23  | 42688.45  | 38400.62  | 107697.4  |
| 29808.91  | 57020.22  | 50874.31  | 65251.05  | 50516.99  | 45885.85  | 25925.32  | 39160.91  | 39242.41  | 47011.28  |
| 32301.9   | 41169.21  | 70890.89  | 49081.91  | 46213.74  | 50527.12  | 34798.84  | 37395.5   | 42099.09  | 72302.88  |
| 29857.08  | 46293.23  | 58029.91  | 58259.47  | 43371.28  | 51519.68  | 26232.01  | 43163.85  | 32239.65  | 78566.57  |

|           |           |           |           |           |           |           |           |           |           |
|-----------|-----------|-----------|-----------|-----------|-----------|-----------|-----------|-----------|-----------|
| LN350.988 |
| 110441.5  | 55009.86  | 65971.25  | 25260.54  | 46010.07  | 45203.6   | 139368    | 25069.95  | 19042.77  | 33812.48  |
| 66546.85  | 84357.5   | 51919.99  | 23672.5   | 50038.17  | 60578.05  | 84431.25  | 22675.36  | 25593.83  | 37032.12  |
| 59440.52  | 92570.44  | 46372.74  | 23762.16  | 45644.23  | 42534.62  | 110471.6  | 25052.52  | 21315.17  | 35307.81  |
| 74090.92  | 72405.32  | 53071.19  | 28769.56  | 54148.85  | 44742.41  | 120007.8  | 28482.63  | 24863.5   | 42106.09  |
| 56001.92  | 57158.58  | 72550.44  | 24108.23  | 35525.3   | 48985.87  | 84812.71  | 21607.84  | 23698.22  | 36127.42  |



|           |           |           |           |           |           |           |           |           |           |
|-----------|-----------|-----------|-----------|-----------|-----------|-----------|-----------|-----------|-----------|
| LN350.988 |
| 54454.02  | 36148.13  | 51389.83  | 35708.56  | 63771.82  | 48186.26  | 60447.89  | 38739.87  | 97147.23  | 56814.52  |
| 59297.15  | 36006.69  | 41211.7   | 41336.37  | 79703.23  | 44974.53  | 97231.5   | 35905.99  | 122954    | 56812.7   |
| 44005.37  | 26360.61  | 40453.64  | 42803.89  | 71310.3   | 92068.36  | 70094.71  | 48502.27  | 95083.09  | 42587.48  |
| 55165.7   | 33981.94  | 37941.11  | 43167.62  | 45708.13  | 43961.92  | 87779.47  | 36818.44  | 119974.5  | 47981.33  |
| 51052.02  | 52051.6   | 49758.65  | 31557.92  | 73427.18  | 54777.17  | 78953.28  | 38668.53  | 107263.6  | 36975.85  |

|           |           |           |           |           |           |           |           |           |           |
|-----------|-----------|-----------|-----------|-----------|-----------|-----------|-----------|-----------|-----------|
| LN350.988 |
| 50681.99  | 48124.61  | 23712     | 36874.76  | 35083.57  | 46254.77  | 74784.68  | 49673.07  | 24474.02  | 37422.51  |
| 83391.37  | 51083.96  | 20333.2   | 36045.02  | 41907.63  | 56216.78  | 70580.74  | 61389.09  | 23849.62  | 34800.51  |
| 70462.23  | 59141.26  | 25529.56  | 32268.9   | 44957.32  | 50367.22  | 78994.5   | 54266.91  | 18107.73  | 32817.67  |
| 63504.22  | 48715.34  | 29645.76  | 47937.36  | 37640.6   | 80912.29  | 62761.98  | 55194.94  | 20038.47  | 33356.18  |
| 69730.3   | 55155.79  | 22561.44  | 36374.85  | 67270.32  | 60204.42  | 73122.22  | 48304.39  | 27536.71  | 38548.33  |

|           |           |           |           |           |           |           |           |           |           |
|-----------|-----------|-----------|-----------|-----------|-----------|-----------|-----------|-----------|-----------|
| LN350.988 |
| 18013.57  | 55138.8   | 30460.97  | 73835.04  | 63401.66  | 89380.4   | 79250.67  | 87981.72  | 85856.02  | 129126    |
| 23589.24  | 65546.02  | 38615.59  | 71943.47  | 82226.45  | 78158.46  | 95572.93  | 95709.82  | 64998.11  | 106404.2  |
| 20457.81  | 64649.91  | 51376.92  | 76107.69  | 56646.7   | 77938.7   | 98428.2   | 78350.57  | 84083.31  | 104360.1  |
| 29654.12  | 55916.85  | 38223.53  | 57383.03  | 66191.11  | 87684.26  | 110979    | 105013.8  | 69610.21  | 129762.2  |
| 25996.22  | 88429.25  | 36677.86  | 94339.85  | 77062.97  | 88679.98  | 133799.9  | 84560.97  | 83778.07  | 105258.1  |

|           |           |           |           |           |           |           |           |           |           |
|-----------|-----------|-----------|-----------|-----------|-----------|-----------|-----------|-----------|-----------|
| LN351.251 | LN351.853 | LN351.866 | LN352.852 | LN353.182 | LN353.181 | LN353.182 | LN353.848 | LN354.851 | LN355.000 |
| 251544.6  | 36064.28  | 42332.02  | 81480.2   | 17950.27  | 17802.4   | 14163.38  | 282115.7  | 22818.05  | 33217.53  |
| 274444.1  | 28518.98  | 33692.45  | 92314.98  | 17391.19  | 15815.59  | 11533.5   | 242352.1  | 15567.39  | 36226.08  |
| 242834.9  | 30381.61  | 37356.48  | 80700.13  | 15577.12  | 18685.02  | 12713.28  | 252397.8  | 19016.54  | 26483.01  |
| 248669.3  | 32958.85  | 42605.25  | 88254.87  | 19768.1   | 17492.59  | 14275.62  | 314036.9  | 22670.58  | 35781.26  |
| 221910.9  | 47266.46  | 32401.25  | 53886.58  | 17700.01  | 16728.15  | 12582.21  | 376507.7  | 28540.11  | 29417.39  |

|           |           |           |           |           |           |           |           |           |           |
|-----------|-----------|-----------|-----------|-----------|-----------|-----------|-----------|-----------|-----------|
| LN355.000 | LN355.000 | LN355.000 | LN355.000 | LN355.000 | LN355.000 | LN355.001 | LN355.000 | LN355.000 | LN355.000 |
| 42795.24  | 37415.71  | 42700.76  | 17801.89  | 41665.62  | 45183.15  | 31214.47  | 42079.73  | 36463.29  | 36571.79  |
| 38975.21  | 36786.11  | 49943.67  | 15882.84  | 42813.27  | 57168.79  | 25827.64  | 50813.58  | 49055.11  | 33543.94  |
| 34416.36  | 34917.61  | 36101.51  | 13102.69  | 36187.21  | 55991.08  | 25409.61  | 41939.22  | 45286.97  | 40069.1   |
| 44920.63  | 40347.87  | 47473.41  | 14849.06  | 44280.93  | 58316.34  | 25112.81  | 55918.84  | 48163.97  | 32294.02  |
| 34162.19  | 36063.01  | 38326.6   | 11599.74  | 45607.69  | 50514.33  | 19610.62  | 36040.77  | 37075.63  | 31318.36  |

|           |           |           |           |           |           |           |           |           |           |
|-----------|-----------|-----------|-----------|-----------|-----------|-----------|-----------|-----------|-----------|
| LN355.000 |
| 30456.42  | 69593.47  | 26340.39  | 41315.37  | 57556.15  | 51823.91  | 25851.13  | 41438.63  | 31644.34  | 57913.39  |
| 39427.94  | 88049.88  | 26687.2   | 43525.48  | 64346.48  | 74132.63  | 30625.58  | 36825.66  | 33022.41  | 60966     |
| 39227.16  | 73604.34  | 42594.98  | 40277.01  | 50524.97  | 57540.68  | 37428.55  | 35286.12  | 28271.82  | 41382.01  |
| 36965.16  | 77508.47  | 29035.88  | 41931.57  | 62756.26  | 72047.37  | 30717.43  | 35245.94  | 31543.25  | 56313.38  |
| 51502.35  | 69882.94  | 26318.13  | 47423.86  | 45102.56  | 52463.47  | 26914.77  | 30312.15  | 38553.01  | 32214.68  |

|           |           |           |           |           |           |           |           |           |           |
|-----------|-----------|-----------|-----------|-----------|-----------|-----------|-----------|-----------|-----------|
| LN355.001 | LN355.000 | LN355.001 | LN355.000 |
| 30131.39  | 60866.57  | 51457.23  | 67059.69  | 49048.1   | 39205.78  | 41423.63  | 63065.9   | 24924.41  | 45948.89  |
| 35036.76  | 45967.21  | 53775.76  | 57873.06  | 53444.81  | 44116.22  | 48004.25  | 59472.75  | 18967.39  | 29724.9   |
| 38037.16  | 39332.52  | 32365.15  | 44542.41  | 28774.09  | 42494.49  | 34685.85  | 50110.62  | 30194.69  | 30392.35  |
| 37415.36  | 42422.92  | 53293.76  | 59621.51  | 52337.52  | 42692.18  | 49262.01  | 64170.71  | 18881.96  | 35155.93  |
| 25701.32  | 43472.39  | 42090.6   | 50846.22  | 31662.16  | 36568.56  | 42441.25  | 66137.15  | 18113.32  | 31763.18  |

|           |           |           |           |           |           |           |           |           |           |
|-----------|-----------|-----------|-----------|-----------|-----------|-----------|-----------|-----------|-----------|
| LN355.000 | LN355.000 | LN355.000 | LN355.000 | LN355.001 | LN355_12. | LN355.001 | LN355.000 | LN355_12. | LN355.000 |
| 21627.75  | 19662.89  | 24870.1   | 36393.16  | 29556.82  | 54436.28  | 22128.83  | 29152.18  | 73037.52  | 77497.43  |
| 23248.48  | 31702.97  | 35455.58  | 38558.04  | 25060.66  | 59799.45  | 20795.47  | 37364.61  | 60118.72  | 66318.97  |
| 24567.76  | 32764.19  | 36210.78  | 37038.02  | 26556.52  | 59159.43  | 19984.45  | 26520.96  | 59932.8   | 70751.6   |
| 20822.19  | 29923.22  | 37149.75  | 41958.39  | 30131.76  | 56181.35  | 19449.85  | 36157.09  | 65046.19  | 67891.87  |
| 20436.38  | 22073.16  | 29826.4   | 29782.69  | 23425.38  | 55272.4   | 18872.29  | 39097.45  | 100080.5  | 71206.37  |



|           |           |           |           |           |           |           |           |           |           |           |
|-----------|-----------|-----------|-----------|-----------|-----------|-----------|-----------|-----------|-----------|-----------|
| LN355.000 | LN355_12. | LN355.001 | LN355.000 |
| 46950.63  | 64490.01  | 21148.46  | 40903.75  | 40897.15  | 19387.41  | 36768.62  | 49619.08  | 40210.82  | 47568.97  |           |
| 54645.46  | 71878.37  | 18398.81  | 58430.13  | 49045.25  | 27101.34  | 31082.85  | 65138.54  | 29200.61  | 57765.09  |           |
| 64413.59  | 57594.87  | 17710.17  | 59220.82  | 32723.91  | 28993.67  | 28326.64  | 47465.7   | 28849.1   | 50472.13  |           |
| 55190.33  | 61152.91  | 19436.78  | 52514.14  | 54340.9   | 26072.93  | 33104.64  | 64882.57  | 30523.74  | 47371.61  |           |
| 59162.36  | 63792.38  | 21768.97  | 35354     | 46175.61  | 27767.21  | 30864.64  | 72915.37  | 25570.25  | 59797.5   |           |

|           |           |           |           |           |           |           |           |           |           |
|-----------|-----------|-----------|-----------|-----------|-----------|-----------|-----------|-----------|-----------|
| LN355.000 | LN355.001 | LN355.000 | LN355.001 | LN355.000 | LN355.001 | LN355.001 | LN355.000 | LN355.000 | LN355.000 |
| 37068.37  | 17123.33  | 42067.87  | 18503.67  | 27793.04  | 17864.71  | 15156.97  | 49981.81  | 38139.89  | 30383.45  |
| 37572.45  | 19968.06  | 38144.9   | 17219.82  | 22055.02  | 22022.53  | 15333.99  | 55971.07  | 45856.31  | 32480.61  |
| 29514.74  | 16858.46  | 36491.09  | 18339.46  | 25823.77  | 17876.23  | 18674.45  | 56091.42  | 46499.14  | 36550.33  |
| 34705.27  | 16895.23  | 39802.79  | 17118.84  | 23104.11  | 19208.71  | 15180.98  | 54428.86  | 41135.32  | 31479.17  |
| 30307.14  | 14247.49  | 36349.94  | 14992.32  | 27544.11  | 15504.17  | 19714.48  | 58351     | 40718.64  | 38822.61  |

|           |           |           |           |           |           |           |           |           |           |
|-----------|-----------|-----------|-----------|-----------|-----------|-----------|-----------|-----------|-----------|
| LN355.000 | LN355.000 | LN355.000 | LN355.000 | LN355.000 | LN355.000 | LN355.001 | LN355.000 | LN355.000 | LN355.000 |
| 36520.41  | 41021.08  | 44676.17  | 27626.78  | 32681.82  | 42045.63  | 15756.74  | 32698.14  | 43500.01  | 33273.1   |
| 40686.03  | 52426.22  | 47534.4   | 28555.64  | 34092.46  | 32878.67  | 17382.18  | 33108.2   | 54766.77  | 27383.72  |
| 39669.64  | 43037.92  | 44907.9   | 23164.67  | 39388.72  | 34118.31  | 15974.22  | 24905.23  | 51552.46  | 26140.78  |
| 39638.12  | 48758.81  | 44799.06  | 30197.37  | 34176.32  | 36006.66  | 17443.46  | 31096.36  | 60835.5   | 30625.33  |
| 30662.76  | 46918.98  | 39278.53  | 26839.72  | 29437.09  | 26235.66  | 14037.79  | 30701.56  | 59080.96  | 30262.78  |

|           |           |           |           |           |           |           |           |           |           |
|-----------|-----------|-----------|-----------|-----------|-----------|-----------|-----------|-----------|-----------|
| LN355.000 | LN355.001 | LN355.000 | LN355.000 | LN355.000 | LN355.000 | LN355.019 | LN355.019 | LN355.019 | LN355.02_ |
| 28257.52  | 28462.6   | 45700.24  | 41736.11  | 32585.94  | 36021.94  | 60272.39  | 55139.46  | 63077.55  | 41433.05  |
| 28967.56  | 31171.84  | 39611.95  | 41082.57  | 33298.81  | 36087.41  | 63519.37  | 62095.55  | 60530.12  | 49169.08  |
| 33062.7   | 30020.58  | 37648.54  | 64079.96  | 25823.63  | 36985.56  | 62486.52  | 51096.64  | 67143.8   | 47339.67  |
| 27844.91  | 27656.25  | 35354.57  | 42482.56  | 35149.88  | 35694.76  | 63102.47  | 50392.88  | 67305.42  | 42904.8   |
| 23903.3   | 27408.19  | 26389.57  | 26874.1   | 33356.04  | 40297.57  | 61957.3   | 50714.94  | 65641.4   | 44199.82  |

|           |           |           |           |           |           |           |           |           |           |
|-----------|-----------|-----------|-----------|-----------|-----------|-----------|-----------|-----------|-----------|
| LN355.019 | LN355.019 | LN355.020 | LN355.019 | LN355.02_ | LN355.02_ | LN355.019 | LN355.020 | LN355.020 | LN355.019 |
| 43786.04  | 32399.47  | 22784.29  | 28857.45  | 72193.11  | 39976.13  | 61875.4   | 64432.03  | 36298.87  | 38492.23  |
| 40430.88  | 23659.03  | 27399.65  | 25632.55  | 75172.92  | 40948.44  | 48532.1   | 63981.38  | 42304.13  | 43364.21  |
| 40840.11  | 32139.48  | 22422.61  | 30468.51  | 70386.65  | 44051.79  | 65447.82  | 65521.97  | 35788.56  | 38119.07  |
| 39579.39  | 34066.56  | 22161.25  | 26755.3   | 73204.89  | 42692.84  | 64575.69  | 67730.52  | 35719.87  | 43515.19  |
| 39369.28  | 33990.03  | 21580.6   | 27115.37  | 77439.47  | 38066.96  | 62618.78  | 64711.34  | 34664.7   | 36605.62  |

|           |           |           |           |           |           |           |           |           |           |
|-----------|-----------|-----------|-----------|-----------|-----------|-----------|-----------|-----------|-----------|
| LN355.02_ | LN355.020 | LN355.019 | LN355.020 | LN355.019 | LN355.019 | LN355.020 | LN355.019 | LN355.019 | LN355.019 |
| 30638.16  | 23772.36  | 32680.67  | 38227.63  | 60878.26  | 59242.17  | 42950.57  | 88406.11  | 58069.09  | 30241.27  |
| 23320.21  | 20022.68  | 33568.57  | 37587.59  | 58712.67  | 61494.41  | 38904.25  | 108847.9  | 60583.97  | 27560.75  |
| 32188.6   | 20362.23  | 35525     | 41123.41  | 64547.27  | 58792.42  | 46919.85  | 90119.75  | 59521.69  | 33305.57  |
| 34265.13  | 20793.83  | 36842.3   | 40067.35  | 67772.95  | 57750.34  | 44102.87  | 97034.81  | 57962.43  | 30333     |
| 30961.08  | 20782.22  | 35538.92  | 41897.62  | 69690.1   | 52764.73  | 42222.49  | 89141.49  | 52368.5   | 31539.55  |

|           |           |           |           |           |           |           |           |           |           |
|-----------|-----------|-----------|-----------|-----------|-----------|-----------|-----------|-----------|-----------|
| LN355.019 | LN355.019 | LN355.020 | LN355.020 | LN355.019 | LN355.019 | LN355.020 | LN355.020 | LN355.019 | LN355.020 |
| 85686.2   | 29161.68  | 20680.56  | 31931.62  | 55741.95  | 80981.86  | 59402.04  | 22633.57  | 49905.35  | 17105.59  |
| 82908.69  | 29411.28  | 14624.07  | 30498.09  | 52172.84  | 101167    | 65452.22  | 21149.24  | 57161.17  | 16827.46  |
| 86537.42  | 28877.06  | 17082.23  | 31810.15  | 57840.4   | 83160.03  | 56669.4   | 22477.53  | 61221.92  | 14878.16  |
| 85486.13  | 28669.92  | 18598.26  | 31148.87  | 59168.52  | 81005.03  | 59604.66  | 22873.96  | 50837.58  | 14640.34  |
| 81000.22  | 31753.22  | 16650.72  | 31880.79  | 59498.86  | 79352.99  | 54768.66  | 23488.71  | 55557.33  | 17405.85  |

|           |           |           |           |           |           |           |           |           |           |
|-----------|-----------|-----------|-----------|-----------|-----------|-----------|-----------|-----------|-----------|
| LN355.020 | LN355.019 | LN355.020 | LN355.020 | LN355.019 | LN355.019 | LN355.019 | LN355.019 | LN355.020 | LN355.020 |
| 46965.52  | 40289.99  | 22200.01  | 31508.79  | 51898.14  | 36426.33  | 60165.7   | 43341.98  | 32463.84  | 26402.75  |
| 33940.22  | 35901.13  | 26155.18  | 26295.15  | 58812.49  | 29250.73  | 62784.12  | 54020.9   | 36620.65  | 20176.14  |
| 49430.59  | 41544.34  | 25051.74  | 34095.15  | 61780.12  | 36389.92  | 61150.91  | 46425.36  | 33347.47  | 28822.8   |
| 43359.47  | 40089.59  | 23556.13  | 31687.93  | 56894.07  | 36740.21  | 64818.28  | 40377.67  | 34146.55  | 27085.94  |
| 49243.48  | 39128.8   | 22527.26  | 30160.17  | 59786.45  | 39631.11  | 59010.73  | 44342.85  | 34226.64  | 29239.63  |



|           |           |           |           |           |           |           |           |           |           |
|-----------|-----------|-----------|-----------|-----------|-----------|-----------|-----------|-----------|-----------|
| LN355.020 | LN355.019 | LN355.019 | LN355.019 | LN355.019 | LN355.02_ | LN355.02_ | LN355.019 | LN355.019 | LN355.019 |
| 18370.88  | 51558.27  | 63255.26  | 55831.87  | 61437.59  | 41567.12  | 25407.59  | 25551.76  | 25938.53  | 35786.84  |
| 20026.02  | 38771.77  | 49468.1   | 66501.11  | 62201.33  | 45029.7   | 25033.01  | 24338.32  | 19810.58  | 32160.77  |
| 17550.56  | 53646.08  | 70103.05  | 58202.13  | 62874.27  | 37971.08  | 26395.68  | 25205.57  | 27095.41  | 40688.41  |
| 16999.83  | 56301     | 67857.82  | 57601.21  | 62225.19  | 40012.57  | 26300.62  | 21992.23  | 23937.45  | 38632.11  |
| 18380.79  | 54288.47  | 65609.72  | 57339.06  | 63683.63  | 39233.04  | 25092.5   | 25329.87  | 25748.77  | 35548.13  |

|           |           |           |           |           |           |           |           |           |           |
|-----------|-----------|-----------|-----------|-----------|-----------|-----------|-----------|-----------|-----------|
| LN355.019 | LN355.02_ | LN355.019 | LN355.019 |
| 26508.89  | 31816.25  | 33581.19  | 39292.84  | 30594.97  | 40466.27  | 48682.82  | 32741.15  | 38741.23  | 43883.77  |
| 26542.97  | 33560.8   | 33090.13  | 35501.3   | 34250.62  | 37308.94  | 43606.99  | 30754.19  | 32384.72  | 47927.13  |
| 24038.93  | 28300.92  | 38409.91  | 38832.31  | 32728.39  | 39480.62  | 44994.61  | 33944.87  | 35113.4   | 46496.77  |
| 24943.37  | 30379.46  | 33971.64  | 38414.55  | 32737.25  | 40516.88  | 44525.96  | 34445.09  | 36779.72  | 47141.23  |
| 26667.71  | 32129.68  | 33622.2   | 38612.93  | 32223.09  | 40145.51  | 46097.23  | 31563.57  | 33788.14  | 45341.7   |

|           |           |           |           |           |           |           |           |           |           |
|-----------|-----------|-----------|-----------|-----------|-----------|-----------|-----------|-----------|-----------|
| LN355.019 | LN355.019 | LN355.019 | LN355.020 | LN355.019 | LN355.020 | LN355.020 | LN355.019 | LN355.019 | LN355.019 |
| 26362.24  | 39322.49  | 42345.3   | 21775.25  | 18631.71  | 42126.61  | 20150.66  | 46859.48  | 38684.38  | 40844.97  |
| 26435.28  | 37849.51  | 47622.64  | 22685.02  | 13554.47  | 39926.89  | 18404.71  | 49735.31  | 37249.76  | 42990.87  |
| 26097.54  | 43097.81  | 44735.19  | 21238.59  | 16146.68  | 39090.59  | 21613.35  | 48662.58  | 38895.69  | 40206.69  |
| 28319.07  | 40357.6   | 44828.13  | 24645.03  | 17717.99  | 45285.75  | 23909.11  | 48545.76  | 37720.42  | 41857.38  |
| 23934.97  | 41147.08  | 42289.28  | 22097.45  | 16922.94  | 39984.72  | 21468.59  | 48258.35  | 38880.97  | 42188.67  |

|           |           |           |           |           |           |           |           |           |           |
|-----------|-----------|-----------|-----------|-----------|-----------|-----------|-----------|-----------|-----------|
| LN355.019 | LN355.019 | LN355.02_ | LN355.019 | LN355.848 | LN356.997 | LN356.997 | LN356.997 | LN356.997 | LN356.997 |
| 34319.72  | 41110.17  | 18478.27  | 38304.36  | 63716.95  | 80510.86  | 61677.75  | 60047.64  | 32104.8   | 29354.84  |
| 35914.8   | 43287.78  | 14743.88  | 39565.05  | 53030.27  | 76755.56  | 63425.82  | 57521.65  | 32053.99  | 27722.19  |
| 35143.72  | 43179.27  | 16159.58  | 42601.18  | 64682.92  | 57062.82  | 62709.32  | 92645.43  | 28596.86  | 27654.48  |
| 33120.59  | 39777.05  | 15267.69  | 41936.79  | 60034.39  | 68236.67  | 66995.8   | 58916.39  | 33665.67  | 27850.79  |
| 35262.88  | 42204.57  | 15550.28  | 41686.35  | 65164.15  | 74863.56  | 58408.39  | 69502.16  | 35931.1   | 28942.45  |

|           |           |           |           |           |           |           |           |           |           |           |
|-----------|-----------|-----------|-----------|-----------|-----------|-----------|-----------|-----------|-----------|-----------|
| LN356.997 | LN356.997 | LN356.998 | LN356.997 | LN356.997 | LN356.998 | LN356.998 | LN356.998 | LN356.998 | LN356.998 | LN356.998 |
| 21382.6   | 22616.98  | 15911.7   | 49000.57  | 38576.12  | 57457.93  | 47915.79  | 33723.28  | 35348.47  | 52141.48  |           |
| 21616.64  | 23212.28  | 12387.09  | 45074.72  | 93297.35  | 59089.59  | 41528.15  | 34665.31  | 37977.84  | 56868.78  |           |
| 23514.85  | 22187.55  | 12650.56  | 60410.93  | 74539.83  | 50846.09  | 42222.91  | 42328.39  | 31084.54  | 67107.31  |           |
| 20563.05  | 23766.85  | 15261.98  | 54540.96  | 40140.26  | 53092.02  | 46015.85  | 32111.22  | 33557.23  | 47687.37  |           |
| 21169.45  | 22303.85  | 14572.56  | 52745     | 46776.38  | 52972.75  | 47945.3   | 33168.86  | 29628.42  | 44895.5   |           |

|           |           |           |           |           |           |           |           |           |           |
|-----------|-----------|-----------|-----------|-----------|-----------|-----------|-----------|-----------|-----------|
| LN356.998 | LN356.998 | LN356.998 | LN356.997 | LN356.998 | LN356.998 | LN356.998 | LN356.997 | LN356.998 | LN356.997 |
| 39179.08  | 45444.47  | 32543.95  | 52076.49  | 35191.9   | 30147.79  | 22008.39  | 48039.38  | 27484.23  | 47097.63  |
| 46795.1   | 50403.45  | 23223.93  | 58034.88  | 31912.12  | 27027.69  | 25332.23  | 69075.59  | 32771.37  | 68333.3   |
| 42101.04  | 49740.79  | 38997.56  | 70698.67  | 35042.85  | 36529.79  | 21199.64  | 38481.68  | 38553.36  | 51391.3   |
| 39678.49  | 45269.71  | 33329.62  | 53133.15  | 29007.28  | 29676.15  | 21478.36  | 49805.95  | 27117.69  | 50333.58  |
| 43330.64  | 43805.98  | 34133.78  | 50776.49  | 31137.64  | 28440.92  | 19172.42  | 57840.21  | 25458.19  | 48314.82  |

|           |           |           |           |           |           |           |           |           |           |
|-----------|-----------|-----------|-----------|-----------|-----------|-----------|-----------|-----------|-----------|
| LN356.997 | LN356.997 | LN356.998 | LN356.997 | LN356.998 | LN356.998 | LN356.997 | LN356.998 | LN356.997 | LN356.998 |
| 45750.9   | 43340.24  | 42729.68  | 67501.21  | 48049.57  | 55914.55  | 51773.94  | 39426.26  | 52223.74  | 24755.24  |
| 81494.45  | 44111.91  | 51719.8   | 72700.55  | 37564.45  | 49682.31  | 47749.01  | 47682.67  | 58522.23  | 42121.35  |
| 58356.49  | 51214.95  | 58225.71  | 55625.84  | 35284.4   | 44027.24  | 72898.61  | 38735.17  | 63062.33  | 32330.28  |
| 42198.51  | 44291.23  | 44028.84  | 57310.44  | 40894.7   | 53331.02  | 56271.39  | 39000.85  | 58006.05  | 28145.14  |
| 42431.23  | 46010.17  | 48332.76  | 60155.18  | 42804.65  | 56397.71  | 63593.09  | 44322.27  | 54331.21  | 28729.29  |

|           |           |           |           |           |           |           |           |           |           |
|-----------|-----------|-----------|-----------|-----------|-----------|-----------|-----------|-----------|-----------|
| LN356.997 | LN356.998 | LN356.997 | LN356.998 | LN356.998 | LN356.998 | LN356.998 | LN356.998 | LN356.997 | LN356.998 |
| 53291.93  | 43993.05  | 44516.55  | 37380.49  | 18029.41  | 35154.88  | 39959.98  | 17612.47  | 77525.88  | 42525.4   |
| 53622.34  | 56131.53  | 52597.46  | 32920.8   | 22625.31  | 30919.22  | 42432.39  | 28906.43  | 88564.71  | 43121.14  |
| 62913.04  | 61033.28  | 64587.83  | 46326.05  | 30614.99  | 36601.97  | 56088.9   | 22404.76  | 88547.02  | 56615.38  |
| 49496.45  | 40151.41  | 47110.53  | 36365.3   | 17774.16  | 35616.99  | 39073.07  | 19657.04  | 78846.37  | 43542.33  |
| 46541.21  | 42109.55  | 40616.57  | 39518.94  | 16828.17  | 39617.55  | 39222.22  | 17238.47  | 88816.76  | 42293.06  |



|           |           |           |           |           |           |           |           |           |           |
|-----------|-----------|-----------|-----------|-----------|-----------|-----------|-----------|-----------|-----------|
| LN356.998 | LN356.997 | LN356.998 | LN356.998 | LN356.998 | LN356.997 | LN356.998 | LN356.997 | LN356.998 | LN356.997 |
| 55332.89  | 60227.66  | 27251.9   | 40685.88  | 40283.83  | 57404.26  | 32621.68  | 59178.68  | 28041.26  | 57159.08  |
| 51038.95  | 66572.46  | 32971.22  | 41207.88  | 40501.14  | 92183.18  | 36215.2   | 69477.3   | 31378.14  | 61934.31  |
| 69535.18  | 63362.13  | 28158.78  | 34478.41  | 40102.84  | 53870.86  | 44562.23  | 83293.44  | 30258.15  | 49018.63  |
| 54864.68  | 66220.26  | 29539.42  | 38726.57  | 43655.85  | 61235.03  | 32844.2   | 71466.93  | 25817.39  | 58241.48  |
| 47748.61  | 62496.08  | 26365.85  | 42782.76  | 41451.46  | 62987.09  | 35397.09  | 66572.11  | 30961.76  | 57342.96  |

|           |           |           |           |           |           |           |           |           |           |
|-----------|-----------|-----------|-----------|-----------|-----------|-----------|-----------|-----------|-----------|
| LN356.998 | LN356.998 | LN356.998 | LN356.998 | LN356.998 | LN356.998 | LN356.997 | LN356.998 | LN356.998 | LN356.998 |
| 39091.31  | 57181.35  | 33872.27  | 30623.41  | 38668.69  | 33513.09  | 62735.11  | 40429.62  | 48796.19  | 22723.2   |
| 46056.2   | 58416.68  | 40186.42  | 27747.62  | 41173.34  | 36172.38  | 58836.98  | 51005.28  | 52807.11  | 38080.71  |
| 53564.5   | 65218.8   | 51054.2   | 37678.72  | 51534.19  | 36718.77  | 65835.16  | 37793.54  | 47484.88  | 28914.69  |
| 47742.71  | 59529.28  | 35580.56  | 27189.69  | 37938.79  | 27407.3   | 64438.48  | 46492.79  | 50796.67  | 21787.72  |
| 45329.6   | 52775.59  | 35612.58  | 29551.93  | 36244.93  | 29069.15  | 65484.09  | 45656.36  | 54006.66  | 22002.28  |

|           |           |           |           |           |           |           |           |           |           |
|-----------|-----------|-----------|-----------|-----------|-----------|-----------|-----------|-----------|-----------|
| LN356.998 | LN356.997 | LN356.998 |
| 35419.42  | 54184.65  | 31554.01  | 31058.86  | 37700.74  | 43801.96  | 19297.18  | 32381.1   | 33770.53  | 38194.74  |
| 25970.3   | 61017.55  | 27506.18  | 45827.07  | 46729.54  | 37793.07  | 17942.68  | 33699.91  | 24918.01  | 37283.09  |
| 32859.38  | 62726.31  | 42260.69  | 35252.16  | 26777.33  | 41782.05  | 18680.97  | 31644.01  | 33650.16  | 36248.01  |
| 30129.62  | 55305.16  | 29994.01  | 34660.47  | 33397.81  | 42703.22  | 20312.99  | 33056.45  | 33963.28  | 36291.91  |
| 35124.88  | 54794.16  | 29384.54  | 32321.49  | 31626.45  | 41308.73  | 19589.33  | 31251.61  | 27209.16  | 35045.2   |

|           |           |           |           |           |           |           |           |           |           |
|-----------|-----------|-----------|-----------|-----------|-----------|-----------|-----------|-----------|-----------|
| LN356.998 | LN356.998 | LN356.998 | LN356.997 | LN356.998 | LN356.998 | LN356.998 | LN356.998 | LN356.998 | LN356.998 |
| 53785.8   | 43777.06  | 24443     | 52612.72  | 19859.49  | 36175.89  | 26217.1   | 25776.93  | 20826.8   | 32422.83  |
| 65151.04  | 48570.29  | 23589.71  | 38603.6   | 22247.39  | 54790.19  | 32977.85  | 24157.96  | 18677.55  | 33540.71  |
| 51616.91  | 35904.53  | 20740.25  | 53032.84  | 21685.3   | 33656.25  | 29949.13  | 19712.18  | 23591.5   | 28681.24  |
| 52780.72  | 43028.05  | 21178.34  | 46881.48  | 19746.38  | 36044.69  | 30527.51  | 24353.92  | 24270.12  | 30228.08  |
| 50909.56  | 45063.26  | 18361.19  | 47726.79  | 21160.91  | 35136.14  | 29989.6   | 21029.34  | 20316.39  | 33052.1   |

|           |           |           |           |           |           |           |           |           |           |
|-----------|-----------|-----------|-----------|-----------|-----------|-----------|-----------|-----------|-----------|
| LN356.998 | LN356.998 | LN356.998 | LN356.998 | LN357.015 | LN357.191 | LN357.191 | LN357.191 | LN357.191 | LN357.191 |
| 39653.2   | 17427.04  | 77597.35  | 94553.68  | 72794.92  | 17289.63  | 20692.74  | 29177.47  | 19410.96  | 34213.06  |
| 37477.34  | 18853.07  | 84321.53  | 85167.58  | 23763.73  | 23716.39  | 20415.24  | 27941.6   | 20035.36  | 32502.05  |
| 33885.75  | 18252.97  | 82714.77  | 94878.73  | 73571.86  | 17929.81  | 18913.45  | 27797.38  | 20592.12  | 31744.53  |
| 36788.93  | 15995.4   | 75803.01  | 87357.35  | 70516.13  | 22335.66  | 21422.42  | 27238.95  | 18725.42  | 34052.99  |
| 36311.99  | 18372.08  | 85181.42  | 98891.63  | 75188     | 21181.31  | 21367.25  | 26191.26  | 19663.59  | 28720.19  |

|           |           |           |           |           |           |           |           |           |           |
|-----------|-----------|-----------|-----------|-----------|-----------|-----------|-----------|-----------|-----------|
| LN357.844 | LN358.843 | LN358.994 |
| 17704.74  | 41556.8   | 96060.96  | 72905.75  | 54700.25  | 98950.33  | 85241.77  | 115175.6  | 127707    | 80602.72  |
| 14393.37  | 36155.75  | 78476.83  | 60561.76  | 66788.14  | 109087    | 86407.97  | 90209.78  | 152196.8  | 68233.57  |
| 15077.51  | 40613.82  | 133784.8  | 79347.7   | 68334.44  | 100929.9  | 76969.15  | 71767.13  | 94297.5   | 87126.35  |
| 21951.04  | 28206.66  | 86809.48  | 59475.08  | 85289.14  | 107055.6  | 111818.3  | 121985.3  | 118088.8  | 64041.98  |
| 21636.17  | 58490.44  | 110942.3  | 74682.45  | 44062.43  | 113279.2  | 79506.47  | 83758.67  | 135001.7  | 64101.67  |

|           |           |           |           |           |           |           |           |           |           |
|-----------|-----------|-----------|-----------|-----------|-----------|-----------|-----------|-----------|-----------|
| LN358.994 |
| 74589.7   | 97542.1   | 62341.31  | 63432.44  | 122158.9  | 68218.39  | 77743.42  | 58628.57  | 102349.7  | 54775.21  |
| 86706.13  | 83464.73  | 43691.92  | 67355.67  | 90774.5   | 90990.66  | 119264.1  | 100785.8  | 75813.32  | 60773.86  |
| 126894.6  | 112410.7  | 54966.43  | 70474.59  | 79237.22  | 78584.22  | 61506.94  | 75816.16  | 109354.5  | 60268.5   |
| 75170.67  | 72061.87  | 53641.55  | 61080.01  | 104433.8  | 62589.52  | 88672.84  | 65464.6   | 104021.5  | 46597.57  |
| 131901.5  | 97644.6   | 80968.05  | 69981.58  | 107368    | 68192.37  | 114209.6  | 92292.42  | 111191.4  | 76600.85  |

|           |           |           |           |           |           |           |           |           |           |
|-----------|-----------|-----------|-----------|-----------|-----------|-----------|-----------|-----------|-----------|
| LN358.994 | LN358.995 | LN358.994 |
| 76960.29  | 56880.3   | 82426.36  | 126845.9  | 66161.76  | 68472.89  | 26831.04  | 90215.8   | 82997.91  | 102735.3  |
| 50046.11  | 55277.12  | 63607.4   | 138687.1  | 67906.68  | 75806.67  | 26193.36  | 99658.92  | 89990.42  | 84110.88  |
| 61140.07  | 61804.65  | 62506.12  | 118996.4  | 61754.07  | 112867.9  | 16371.77  | 56193.93  | 77876.1   | 162405.3  |
| 104124    | 39153.62  | 81723.96  | 125855    | 64534.85  | 72518.46  | 20754.52  | 113063.5  | 132312.5  | 122262.8  |
| 73404.87  | 48817.99  | 64391.71  | 97157.15  | 92550.08  | 69039.62  | 39754.68  | 79035.13  | 90499.79  | 131563.8  |



|           |           |           |           |           |           |           |           |           |           |
|-----------|-----------|-----------|-----------|-----------|-----------|-----------|-----------|-----------|-----------|
| LN358.994 | LN358.995 |
| 153368.1  | 101332    | 74645.02  | 110955.2  | 80973.67  | 111034.7  | 79409.62  | 90692.16  | 71730.73  | 27408.51  |
| 96296.1   | 116456.2  | 54543.83  | 175856.6  | 67010.02  | 133531    | 86501.63  | 98864.86  | 58970.61  | 39989.6   |
| 96767.84  | 93977.19  | 51167.86  | 112033.4  | 61413.16  | 79151.91  | 75575.52  | 92737.98  | 62871.79  | 28363.06  |
| 127113.6  | 93791.7   | 79914.58  | 109367.5  | 57772.3   | 121939.3  | 72023.03  | 123752.7  | 86485.23  | 37733.52  |
| 100880.8  | 84058.04  | 57636.56  | 139669.2  | 83973.56  | 99706.32  | 108356.6  | 91806.59  | 60830.11  | 45030.76  |

|           |           |           |           |           |           |           |           |           |           |
|-----------|-----------|-----------|-----------|-----------|-----------|-----------|-----------|-----------|-----------|
| LN358.994 |
| 105907.1  | 52953.87  | 95793.56  | 54243.81  | 130020.9  | 64792.27  | 84324.79  | 79233.89  | 104104    | 64597.63  |
| 82075.18  | 48244.29  | 86619.5   | 52787.7   | 105042.7  | 62882.99  | 94934.79  | 80953.09  | 88983.37  | 67640.08  |
| 134926.4  | 48372.75  | 110807.9  | 74731.15  | 76212.8   | 66897.9   | 83794.18  | 94087.12  | 168833.7  | 73743.27  |
| 101412    | 57407.86  | 113528.9  | 46903.87  | 115559.8  | 90436.99  | 116100.2  | 90848.98  | 137714.4  | 70942.71  |
| 101092.5  | 43080.72  | 71897.65  | 59940.01  | 111748.6  | 76382.89  | 87618.55  | 83366.37  | 81695.26  | 77538.91  |

|           |           |           |           |           |           |           |           |           |           |
|-----------|-----------|-----------|-----------|-----------|-----------|-----------|-----------|-----------|-----------|
| LN358.994 | LN358.994 | LN358.994 | LN358.994 | LN358.995 | LN358.994 | LN358.994 | LN358.994 | LN358.995 | LN358.995 |
| 156820.6  | 140726.5  | 115539.9  | 83790.77  | 33745.1   | 86183.16  | 74934.62  | 90229.62  | 35347.05  | 34513.79  |
| 99550.88  | 106098.2  | 155159.8  | 56336.52  | 34958.57  | 99423.27  | 98646.66  | 76964.82  | 38790     | 43820.07  |
| 123909.5  | 141937.3  | 150863.8  | 49380.07  | 28597.23  | 64428.64  | 78314.63  | 95404.08  | 52418.69  | 31048.84  |
| 110538.8  | 138733.4  | 119400.6  | 46578.14  | 36972.99  | 68839.45  | 79179.08  | 54129.61  | 35339.33  | 31083.84  |
| 116458.6  | 258006.8  | 140020.8  | 58764.44  | 32960.29  | 74330.99  | 115940.4  | 55845.51  | 39734.02  | 41535.54  |

|           |           |           |           |           |           |           |           |           |           |
|-----------|-----------|-----------|-----------|-----------|-----------|-----------|-----------|-----------|-----------|
| LN358.994 | LN358.994 | LN358.994 | LN358.994 | LN358.994 | LN358.995 | LN358.994 | LN358.994 | LN358.995 | LN358.994 |
| 127393.9  | 135139.8  | 64063.46  | 148516.3  | 100177.7  | 34083.83  | 153092    | 88483.37  | 44891.76  | 37581.98  |
| 87934.45  | 97397.58  | 99083.2   | 118668.9  | 110931.6  | 28711.73  | 164166.5  | 120546.5  | 36689.74  | 36238.36  |
| 111169    | 118520.5  | 97446.12  | 126033.5  | 123818.4  | 50173.17  | 164763.9  | 111392.2  | 29661.16  | 39918.65  |
| 86753.51  | 100245.2  | 88032.9   | 171922.6  | 139126    | 38539.1   | 162107.7  | 132159.3  | 28802.99  | 34999.8   |
| 108713    | 98540.37  | 90118.77  | 137093.7  | 100464.1  | 38306.03  | 182697.5  | 104398.4  | 36954.39  | 37176.86  |

|           |           |           |           |           |           |           |           |           |           |
|-----------|-----------|-----------|-----------|-----------|-----------|-----------|-----------|-----------|-----------|
| LN358.994 | LN358.995 | LN358.995 | LN358.994 | LN358.994 | LN358.995 | LN358.994 | LN358.995 | LN358.994 | LN358.994 |
| 74352.73  | 41798.28  | 33552.94  | 151783.6  | 138764.3  | 31623.61  | 62676.84  | 28512.36  | 51339.85  | 194509.6  |
| 62909.52  | 33380.92  | 42185.04  | 183119.9  | 105980.2  | 33606.57  | 54750.96  | 29881.98  | 60015.43  | 144153.6  |
| 85391.67  | 43600.62  | 34337.36  | 152020.3  | 81026.84  | 25325.79  | 68323.89  | 33207.6   | 57665.56  | 166437.5  |
| 69398.79  | 35528.48  | 30964.53  | 140986.4  | 123847.4  | 36651.17  | 57724.72  | 36992.62  | 53817.02  | 165470.4  |
| 66018.22  | 33370.46  | 32650.21  | 124561.1  | 99494.58  | 40104.58  | 57260.88  | 30304.33  | 68144.49  | 166001.4  |

|           |           |           |           |           |           |           |           |           |           |
|-----------|-----------|-----------|-----------|-----------|-----------|-----------|-----------|-----------|-----------|
| LN358.994 | LN358.994 | LN358.994 | LN358.994 | LN358.994 | LN359.154 | LN359.152 | LN359.974 | LN362.875 | LN362.969 |
| 76857.43  | 133559.8  | 73021.01  | 92364.58  | 51976.42  | 12485.52  | 13892.04  | 16816.63  | 188119.9  | 42981.68  |
| 103254.8  | 177542.1  | 52131.06  | 81989.01  | 79887.96  | 14191.5   | 12681.09  | 12722.74  | 226812.7  | 43456.72  |
| 78866     | 129525.7  | 62197.87  | 115666.8  | 86679.77  | 13411.89  | 15027.79  | 14221.33  | 154305.4  | 44962.64  |
| 89124.55  | 146736.2  | 55479.41  | 87587.81  | 55281.66  | 12958.13  | 13200.44  | 16682.84  | 147166.5  | 38579.17  |
| 120146.7  | 120943.7  | 54470.89  | 86244.55  | 61013.4   | 12027.96  | 15363.71  | 19246.38  | 175787.5  | 43292.65  |

|           |           |           |           |           |           |           |           |           |           |
|-----------|-----------|-----------|-----------|-----------|-----------|-----------|-----------|-----------|-----------|
| LN362.969 | LN362.97_ | LN362.969 | LN362.969 | LN363.875 | LN364.489 | LN365.022 | LN365.246 | LN365.884 | LN366.869 |
| 48356.19  | 38439.57  | 39716.13  | 45947.77  | 28686.34  | 67855.1   | 46664.76  | 16163.91  | 36747.36  | 11454.15  |
| 48147.7   | 37273.11  | 40930.16  | 45213.82  | 28643.36  | 76443.65  | 47074.31  | 14138.31  | 31316.33  | 12322.22  |
| 43518.81  | 38420.54  | 41969.89  | 44697.4   | 26748.36  | 72371.22  | 46957.74  | 17438.4   | 30280.28  | 13373.25  |
| 49427.76  | 38018.29  | 34809.63  | 45753.9   | 27023.81  | 62794.44  | 52360.65  | 18736.36  | 31624.7   | 12987.3   |
| 46006.47  | 37110.24  | 45025.22  | 47163.11  | 37816.17  | 66691.52  | 50191.82  | 18181.54  | 32736.88  | 15044.96  |

|           |           |           |           |           |           |           |           |           |           |
|-----------|-----------|-----------|-----------|-----------|-----------|-----------|-----------|-----------|-----------|
| LN367.019 |
| 41265.6   | 25932.83  | 42570.2   | 25939.02  | 59909.98  | 48217.75  | 32573.29  | 45218.17  | 26078.27  | 55930.63  |
| 42415.71  | 24997.88  | 44851.96  | 27566.35  | 52587.88  | 50519.95  | 32019.23  | 47014.97  | 28404.63  | 55089.21  |
| 45925.93  | 27511.28  | 40364.62  | 24302.67  | 56668.01  | 48789.98  | 30440.45  | 44534.65  | 25609.14  | 56938.81  |
| 44296.22  | 26291.91  | 43101.54  | 25927.6   | 57662.76  | 53024.08  | 31978.19  | 47477.99  | 23742.56  | 59409.53  |
| 40306.24  | 27324     | 44406.65  | 28216.34  | 56553.86  | 51801.56  | 31151.46  | 46357.25  | 24994.98  | 55744.64  |



|           |           |           |           |           |           |           |           |           |           |
|-----------|-----------|-----------|-----------|-----------|-----------|-----------|-----------|-----------|-----------|
| LN367.02_ | LN367.019 | LN367.243 | LN367.357 | LN368.241 | LN368.889 | LN368.997 | LN368.997 | LN368.997 | LN368.997 |
| 24972.36  | 40832.44  | 73900.06  | 16225.69  | 29531.6   | 52859.24  | 38908.72  | 26505.33  | 51893.75  | 31575.61  |
| 25606.29  | 41781.55  | 68579.66  | 13772.96  | 25785.85  | 51743.03  | 36522.79  | 26028.14  | 52754.26  | 33216.42  |
| 24868.59  | 39980.54  | 75672.93  | 16051.29  | 22102.81  | 57217.39  | 33468.17  | 26433.64  | 52414.69  | 31890.51  |
| 28696.77  | 42585.21  | 75638.94  | 15354.98  | 26868.92  | 53417.64  | 37252.33  | 26000.48  | 47184.32  | 31267.14  |
| 23942.8   | 40502.66  | 81917.76  | 12915.5   | 22293.8   | 48891.15  | 36244.85  | 27266.91  | 45127.87  | 33296.46  |

|           |           |           |           |           |           |           |           |           |           |
|-----------|-----------|-----------|-----------|-----------|-----------|-----------|-----------|-----------|-----------|
| LN368.997 | LN368.998 | LN368.998 | LN368.998 | LN368.998 | LN368.999 | LN368.998 | LN368.998 | LN368.998 | LN368.998 |
| 22575.08  | 50534.49  | 16991.08  | 44639.65  | 55308.52  | 17291.65  | 26394.72  | 38365.81  | 56394.24  | 13577.06  |
| 24454.09  | 46420.06  | 15300.74  | 44537.04  | 51792.2   | 17189.84  | 25793.58  | 39086.02  | 54215.93  | 13867.53  |
| 24396.07  | 49794.97  | 14794.27  | 39957.2   | 50066.99  | 17196.23  | 27062.8   | 34600.98  | 57963.56  | 14769.47  |
| 21375.59  | 48289.31  | 13287.75  | 40937.24  | 53969.95  | 18309.6   | 28620.03  | 37562.48  | 57684.07  | 15345.11  |
| 24157.89  | 50828.7   | 13121.54  | 44012.21  | 53714.2   | 15636.66  | 29238.28  | 35461.52  | 55263.14  | 10915.82  |

|           |           |           |           |           |           |           |           |           |           |
|-----------|-----------|-----------|-----------|-----------|-----------|-----------|-----------|-----------|-----------|
| LN368.998 |
| 26361.17  | 35153.88  | 43220.41  | 42531.55  | 25712.29  | 22951.62  | 35737.98  | 28021.65  | 19222.58  | 37578.93  |
| 26351.67  | 32635.85  | 44841.46  | 41073.53  | 29331.66  | 25237.86  | 33971.23  | 28657.04  | 16803.67  | 35766.48  |
| 29536.7   | 30856.24  | 48544.31  | 42806.87  | 28203.02  | 23960.6   | 33619.94  | 29232.07  | 15008.01  | 32608.85  |
| 28184.07  | 30710.88  | 44015.01  | 39027.36  | 27213.05  | 25977.28  | 34379.88  | 28898.39  | 17466.91  | 35122.93  |
| 28010.59  | 33318.41  | 46970.23  | 40808.45  | 25448.75  | 26800.56  | 35229.39  | 35049.52  | 17443.74  | 33276.8   |

|           |           |           |           |           |           |           |           |           |           |
|-----------|-----------|-----------|-----------|-----------|-----------|-----------|-----------|-----------|-----------|
| LN368.998 |
| 20277.44  | 45650.37  | 28278.6   | 66133.36  | 45233.26  | 28139.69  | 58619.79  | 26356.68  | 27764.23  | 43654.43  |
| 17089.06  | 46047.68  | 30140.38  | 68227.57  | 48330.85  | 32479.55  | 55342.47  | 26116.82  | 28484.36  | 44720.07  |
| 18812.93  | 43255.44  | 28000.23  | 65183.72  | 49063.87  | 29906.29  | 57170.22  | 25902.48  | 28866.89  | 42701.8   |
| 18801.89  | 41579.63  | 31868.01  | 61950.79  | 49147.39  | 28028.5   | 47912.36  | 28875.8   | 27964.82  | 46304.51  |
| 19006.59  | 39620.01  | 29728.02  | 65597.62  | 44005.11  | 28516.88  | 53598.5   | 28003.05  | 26980.35  | 43591.5   |

|           |           |           |           |           |           |           |           |           |           |
|-----------|-----------|-----------|-----------|-----------|-----------|-----------|-----------|-----------|-----------|
| LN368.998 |
| 40785.35  | 45605.82  | 32161.1   | 33217.83  | 43583.74  | 39928.59  | 49061.88  | 12967.13  | 23673.33  | 51642.64  |
| 48123.11  | 43792.25  | 32182.36  | 31949.98  | 38479.56  | 40461.29  | 46138.88  | 13490.78  | 23678.96  | 49221.7   |
| 43008.71  | 44791.64  | 33317.66  | 33867.47  | 42347.43  | 38586.82  | 50499.94  | 12784.99  | 25117.57  | 48243.07  |
| 47189.12  | 46049.49  | 32198.98  | 32613.28  | 41544.6   | 39832.15  | 50240.36  | 11614.65  | 24121.95  | 49483.65  |
| 39675.33  | 45245.17  | 31848.88  | 31876.56  | 37845.33  | 35153.91  | 50987.4   | 13405.68  | 23967.6   | 43125.01  |

|           |           |           |           |           |           |           |           |           |           |
|-----------|-----------|-----------|-----------|-----------|-----------|-----------|-----------|-----------|-----------|
| LN368.998 |
| 30428.69  | 37885.26  | 38161.98  | 44045.61  | 41852.16  | 42589.37  | 56572.41  | 38667.55  | 17610.33  | 37827.06  |
| 29112.49  | 38030.46  | 40003.22  | 41487.67  | 38997.24  | 43130.98  | 54630.55  | 35802.67  | 20299.13  | 38037.89  |
| 28456.49  | 37703.01  | 39177.45  | 41576.56  | 34648.83  | 42822.37  | 61252.66  | 41609.84  | 19510.47  | 35121.9   |
| 26136.2   | 35910.76  | 41789.9   | 44189.7   | 36990.7   | 44389.31  | 54627.03  | 39271.2   | 18544.67  | 40988.42  |
| 29046.44  | 40506.8   | 41033     | 44387     | 39685.25  | 45603.72  | 61227.83  | 36458.54  | 19571.04  | 36023.58  |

|           |           |           |           |           |           |           |           |           |           |
|-----------|-----------|-----------|-----------|-----------|-----------|-----------|-----------|-----------|-----------|
| LN368.998 | LN368.998 | LN368.998 | LN368.998 | LN368.998 | LN368.998 | LN368.999 | LN368.998 | LN368.998 | LN368.998 |
| 34132.38  | 32839.51  | 66779.98  | 38753.39  | 24361.44  | 37388.2   | 19232.38  | 34975.42  | 47465.83  | 26505.51  |
| 32583.88  | 31260.72  | 64241.69  | 37141.72  | 25283.56  | 37844.71  | 15016.21  | 32547.71  | 51054.91  | 27120.18  |
| 38627.17  | 33904.97  | 67636.3   | 35524.56  | 22699.35  | 40099.23  | 16969.62  | 34656.26  | 47124.08  | 28958.62  |
| 36963     | 30560.83  | 68379.8   | 34436.17  | 22837.71  | 39134.51  | 18076.1   | 35391.38  | 51322.68  | 27689.95  |
| 35834.37  | 29114.48  | 68150.29  | 35881.04  | 22989.1   | 36462.05  | 15853.9   | 33146.56  | 46188     | 23952     |

|           |           |           |           |           |           |           |           |           |           |
|-----------|-----------|-----------|-----------|-----------|-----------|-----------|-----------|-----------|-----------|
| LN368.998 | LN368.998 | LN368.998 | LN368.998 | LN368.998 | LN368.999 | LN368.998 | LN368.998 | LN368.998 | LN368.999 |
| 42195.85  | 49586.82  | 20951.13  | 31017.76  | 38294.02  | 30764.95  | 16403.89  | 51220.05  | 27605.96  | 19348.56  |
| 42060.05  | 46959.2   | 21020.94  | 33719.13  | 38303.88  | 34696.69  | 17066.49  | 48599.16  | 27627.16  | 19417.61  |
| 38703.78  | 47397.86  | 22504.65  | 33757.01  | 39870.4   | 31313.92  | 17991.37  | 45522.59  | 26879.83  | 18806.58  |
| 39700.85  | 49281.45  | 23170.56  | 32158.26  | 38155.15  | 32687.15  | 16547.96  | 51298.62  | 29791.1   | 19471.33  |
| 38878.14  | 46498.22  | 22028.49  | 31103.99  | 39737.66  | 30688.47  | 16946.83  | 43439.72  | 29378.83  | 20396.67  |



|           |           |           |           |           |           |           |           |           |           |
|-----------|-----------|-----------|-----------|-----------|-----------|-----------|-----------|-----------|-----------|
| LN368.998 |
| 21591.86  | 22960.18  | 43019.33  | 37876.99  | 53568.76  | 27742.84  | 27599.18  | 37620.14  | 16981.47  | 62833.66  |
| 22362.42  | 21584.44  | 42351.57  | 37527.33  | 49755.04  | 27265.12  | 28543.69  | 38053.91  | 19082.29  | 65720.96  |
| 18993.07  | 22542.33  | 39381.85  | 37800.52  | 49125.16  | 24850.13  | 26689.21  | 37564.2   | 16948.93  | 60169.84  |
| 19559.65  | 21157.56  | 40973.47  | 45118.81  | 52469.36  | 20935.39  | 29571.1   | 38750.16  | 15745.96  | 63126.26  |
| 18645.74  | 22051.5   | 38665.21  | 38437.91  | 52249.24  | 24179.86  | 25464.09  | 40552.15  | 16138.51  | 62092.62  |

|           |           |           |           |           |           |           |           |           |           |
|-----------|-----------|-----------|-----------|-----------|-----------|-----------|-----------|-----------|-----------|
| LN368.998 | LN368.998 | LN368.998 | LN368.998 | LN368.998 | LN368.998 | LN369.016 | LN369.016 | LN369.016 | LN369.016 |
| 29590.47  | 59065.65  | 24861.24  | 30454.95  | 65560.95  | 48640.3   | 37959.82  | 37015.24  | 58173.13  | 44123.28  |
| 28959.51  | 58297.53  | 28911.5   | 29172.18  | 62077.56  | 46878.82  | 38721.96  | 34971.02  | 58940.44  | 44665.52  |
| 30439.29  | 63863.9   | 27686.15  | 29609     | 60730.36  | 44737.2   | 38600.68  | 39898.86  | 58182.84  | 43859.36  |
| 28697.35  | 57546.83  | 25235.43  | 27292.44  | 61371.74  | 41496.59  | 39694.09  | 38110.88  | 60737.55  | 48319.87  |
| 30296.34  | 60095.59  | 27363.54  | 30403.36  | 64749.92  | 41859.19  | 41178.97  | 38904.44  | 60128.34  | 47386.5   |

|           |           |           |           |           |           |           |           |           |           |
|-----------|-----------|-----------|-----------|-----------|-----------|-----------|-----------|-----------|-----------|
| LN369.213 | LN370.002 | LN370.838 | LN370.869 | LN370.868 | LN370.994 | LN370.994 | LN370.994 | LN370.994 | LN370.995 |
| 32863.09  | 14899.45  | 38447.73  | 18980.34  | 14769.97  | 46634.98  | 57502.93  | 61021.45  | 35342.03  | 16420.27  |
| 33061.42  | 18358.74  | 21201.88  | 20477.54  | 13102.42  | 37675.81  | 50199.41  | 64018.01  | 33022.53  | 17821.51  |
| 33591.41  | 20233     | 25996.64  | 21887.17  | 12865.14  | 44552.8   | 53112.13  | 51539.84  | 32151.67  | 15066.88  |
| 30474.16  | 22479.76  | 36693.29  | 20547.03  | 15356.98  | 43841.96  | 53928.57  | 62910.91  | 32084.68  | 11304.67  |
| 27042.42  | 26068.49  | 43020.4   | 18701.19  | 13668.69  | 44169.89  | 52953.02  | 61513.62  | 29418.78  | 9270.321  |

|           |           |           |           |           |           |           |           |           |           |
|-----------|-----------|-----------|-----------|-----------|-----------|-----------|-----------|-----------|-----------|
| LN370.994 | LN370.994 | LN370.995 | LN370.994 | LN370.995 | LN370.994 | LN370.994 | LN370.994 | LN370.994 | LN370.994 |
| 52848.33  | 49957.06  | 25908.41  | 34470.24  | 24208.92  | 83352.02  | 79164.29  | 60128.36  | 48347.61  | 22058.1   |
| 43677.76  | 48579.58  | 25443.35  | 32031.96  | 26707.67  | 67945.47  | 51800.51  | 59193.46  | 42840.79  | 25591.13  |
| 56967.8   | 46372.75  | 22418.25  | 42108.86  | 22836.28  | 74699.9   | 43983.36  | 72655.37  | 51547.11  | 29179.58  |
| 55625.89  | 52641.79  | 29596.91  | 53328.5   | 24931.05  | 82682.51  | 58669.93  | 82554.81  | 55191.88  | 27956.76  |
| 62792.41  | 32472.92  | 22821.19  | 34542.45  | 29391.99  | 65715.53  | 77310.57  | 82017.99  | 63218.95  | 31215.92  |

|           |           |           |           |           |           |           |           |           |           |
|-----------|-----------|-----------|-----------|-----------|-----------|-----------|-----------|-----------|-----------|
| LN370.994 | LN370.995 | LN370.995 | LN370.994 | LN370.994 | LN370.995 | LN370.994 | LN370.995 | LN370.994 | LN370.995 |
| 64109.44  | 32622.82  | 22719.76  | 45386.08  | 52663.11  | 30356.43  | 59422.97  | 18319.92  | 35757.62  | 16652.36  |
| 37938.25  | 29100.93  | 27437.71  | 31876.85  | 45775.14  | 24860.39  | 62067.37  | 17784.64  | 34742.04  | 25609.81  |
| 37663     | 28896.95  | 22226.26  | 38477.36  | 44475.98  | 34212.39  | 46499.05  | 16077.12  | 36166     | 18532.29  |
| 40623.66  | 31358.07  | 24557.53  | 34052.55  | 59315.25  | 39172.75  | 83016.74  | 22347.96  | 40749.76  | 16712.46  |
| 38171.51  | 27508.43  | 24280.34  | 46982.33  | 50067.06  | 42171.43  | 48627.4   | 18611.05  | 33186.59  | 16593.64  |

|           |           |           |           |           |           |           |           |           |           |
|-----------|-----------|-----------|-----------|-----------|-----------|-----------|-----------|-----------|-----------|
| LN370.995 | LN370.994 | LN370.995 |
| 38105.48  | 59442.64  | 51144.43  | 56469.43  | 74560.43  | 37063.58  | 37423.78  | 29537.98  | 35564.76  | 23056.2   |
| 30983.7   | 67063.65  | 53993.87  | 46555.83  | 58216.88  | 29917.93  | 39198.65  | 35932.04  | 41867.22  | 20849.88  |
| 27752.22  | 83762.27  | 46843.18  | 54734.28  | 55515.63  | 35203.18  | 41717.49  | 25910.83  | 39646.52  | 19033.41  |
| 40998.14  | 102161.4  | 65825.84  | 57658.74  | 76476.07  | 41153.63  | 40832.29  | 37606.72  | 55251.64  | 18075.35  |
| 26575.74  | 120789.5  | 52220.78  | 63450.52  | 72701     | 36916.31  | 43240.31  | 29519.99  | 41656.29  | 15274     |

|           |           |           |           |           |           |           |           |           |           |
|-----------|-----------|-----------|-----------|-----------|-----------|-----------|-----------|-----------|-----------|
| LN370.994 |
| 37665.32  | 56876.9   | 40559.54  | 37100.62  | 43216.34  | 51741.31  | 24697.87  | 48161.36  | 35260.51  | 37171.31  |
| 59154.16  | 40679.13  | 36167.04  | 34303.64  | 37061.04  | 58083.26  | 46398.03  | 30590.04  | 35005.93  | 50769.58  |
| 38368.6   | 43939.74  | 40944.3   | 38519.22  | 45934.2   | 51642.15  | 30482.96  | 32776.85  | 29939.64  | 33455.04  |
| 35146.46  | 59052.96  | 39267.37  | 36272.24  | 67992.53  | 57436.99  | 28303.69  | 31551.85  | 34269.33  | 47449.76  |
| 32452.38  | 40559.71  | 45760.54  | 46474.51  | 36591.07  | 44207.04  | 30337.47  | 36840.36  | 44030.31  | 27910.62  |

|           |           |           |           |           |           |           |           |           |           |
|-----------|-----------|-----------|-----------|-----------|-----------|-----------|-----------|-----------|-----------|
| LN370.995 | LN370.995 | LN370.994 |
| 18506.61  | 20750.16  | 43237     | 36234.84  | 27251.89  | 50508.21  | 63919.15  | 41590.04  | 69098.54  | 55485.13  |
| 15297.79  | 20746.08  | 46234.02  | 44627.68  | 29669.18  | 47961.47  | 80253.35  | 50252.29  | 66042.28  | 54505.26  |
| 20795.65  | 13686.77  | 40688.32  | 43033.07  | 29700.28  | 49048.69  | 76635.87  | 40993.66  | 67229.28  | 52810.59  |
| 14592.87  | 15240.35  | 45566.92  | 39683.12  | 30983.32  | 47642.07  | 52732.55  | 41926.85  | 89837.47  | 64711.71  |
| 15746.68  | 14375.43  | 42519.2   | 40927.25  | 38408.73  | 46223.28  | 96970.69  | 43064.06  | 66084.93  | 41961.7   |



|           |           |           |           |           |           |           |           |           |           |
|-----------|-----------|-----------|-----------|-----------|-----------|-----------|-----------|-----------|-----------|
| LN370.994 | LN370.995 | LN370.994 | LN370.994 | LN370.995 | LN370.994 | LN370.994 | LN370.995 | LN370.995 | LN370.995 |
| 72066.75  | 32567.8   | 48864.67  | 67675.96  | 37954.17  | 45161.32  | 43879.4   | 25443.54  | 16523.95  | 29806.27  |
| 54073.92  | 30729.54  | 64703.64  | 56231.18  | 34899.58  | 30875.3   | 78908.39  | 24996.93  | 14521.04  | 40372.22  |
| 66666.92  | 28379.82  | 49033.13  | 60986.78  | 31056.91  | 36239     | 61424.77  | 20954.19  | 19081     | 40176.3   |
| 59244.75  | 30712.91  | 51705.59  | 58156.91  | 34077.85  | 31101.99  | 76583.3   | 19346.89  | 27661.28  | 46516.28  |
| 80232.68  | 30885.43  | 57198.48  | 56811.98  | 33018.25  | 37952.29  | 52149.19  | 21754.68  | 19119.88  | 29158.66  |

|           |           |           |           |           |           |           |           |           |           |
|-----------|-----------|-----------|-----------|-----------|-----------|-----------|-----------|-----------|-----------|
| LN370.995 | LN370.994 | LN370.994 | LN370.995 | LN370.994 | LN370.994 | LN370.995 | LN370.994 | LN370.994 | LN370.994 |
| 30354.13  | 42519.2   | 68781.31  | 39010.35  | 64990.6   | 37182.76  | 27000.64  | 50670.47  | 32124.14  | 29715     |
| 27343.68  | 60027.39  | 95044.55  | 55108.94  | 45798.36  | 38285.89  | 36044.5   | 41246.68  | 37016.24  | 37789.86  |
| 34569.64  | 40515.3   | 68797.41  | 40875.78  | 34299.12  | 36604.67  | 29378.45  | 43965.22  | 32787.02  | 30609.2   |
| 32793.04  | 38330.63  | 88863.29  | 38490.91  | 50555.98  | 39918.89  | 38397.13  | 33690.04  | 35512.39  | 32117.62  |
| 50926.73  | 67943.79  | 74865.66  | 37920.88  | 40430.99  | 31878.14  | 26633.05  | 38700.15  | 43473.09  | 29099.24  |

|           |           |           |           |           |           |           |           |           |           |
|-----------|-----------|-----------|-----------|-----------|-----------|-----------|-----------|-----------|-----------|
| LN370.994 | LN370.994 | LN370.994 | LN370.994 | LN370.995 | LN371.848 | LN371.900 | LN371.901 | LN371.900 | LN371.900 |
| 32923.33  | 63293.96  | 89933.88  | 63798.45  | 19815.08  | 40817.99  | 43114.88  | 27610.1   | 38261.13  | 15832.78  |
| 40094.13  | 61109.07  | 54799.69  | 49580.86  | 17387.34  | 49555.51  | 47022.05  | 32787.13  | 37303.94  | 16201.46  |
| 38332.13  | 56952.75  | 50192.14  | 51289.09  | 17834.47  | 56686.93  | 39321.48  | 30753.35  | 35149.93  | 17161.85  |
| 31273.91  | 77468.82  | 50211.98  | 42751.8   | 17243.78  | 32828.77  | 45648.43  | 29365.26  | 34735.67  | 15515.64  |
| 32194.73  | 54801.58  | 60047.7   | 44509.48  | 17906.2   | 42239.83  | 44672.44  | 30828.89  | 35481.4   | 13878.93  |

|           |           |           |           |           |           |           |           |           |           |
|-----------|-----------|-----------|-----------|-----------|-----------|-----------|-----------|-----------|-----------|
| LN371.901 | LN371.900 | LN371.900 | LN371.900 | LN371.901 | LN371.901 | LN371.900 | LN371.900 | LN371.901 | LN371.900 |
| 34654.33  | 32233.24  | 35647.85  | 45971.39  | 36766.03  | 44194.47  | 40596.66  | 39131.23  | 17428.78  | 29496.42  |
| 33965.95  | 34483.41  | 34005.45  | 46444.23  | 43213.88  | 47254.32  | 37553.3   | 41854.06  | 17557.79  | 36955.49  |
| 27180.4   | 32142.02  | 30648     | 47563.54  | 39950.76  | 43632.76  | 35999.37  | 37688.23  | 15616.99  | 35717.37  |
| 29674.26  | 32535.48  | 30501.67  | 45727.85  | 38590.71  | 41458.99  | 39413.57  | 41793.69  | 12824.4   | 30784.65  |
| 30006.77  | 33568.79  | 35572.28  | 45717.72  | 39702.41  | 43599.06  | 37220     | 32297.87  | 15013.11  | 31728.66  |

|           |           |           |           |           |           |           |           |           |           |
|-----------|-----------|-----------|-----------|-----------|-----------|-----------|-----------|-----------|-----------|
| LN371.901 | LN371.900 | LN371.901 | LN371.901 | LN371.901 | LN371.900 | LN371.901 | LN371.900 | LN371.901 | LN371.901 |
| 29745.72  | 29033.04  | 54200.6   | 39332.63  | 31033.92  | 57109.58  | 27095.98  | 32334.78  | 44193.31  | 35429.78  |
| 31031.47  | 33082.1   | 57540.65  | 44927.93  | 31387.73  | 60867.64  | 30598.86  | 32524.47  | 40275.39  | 37068.88  |
| 30480.52  | 25384.42  | 55715.33  | 40862.72  | 34821.29  | 59213.31  | 26041.47  | 31147.11  | 39361.71  | 34869.61  |
| 29452.55  | 25752.98  | 51952.62  | 42456.16  | 30454.16  | 54972.61  | 26880.35  | 28831.04  | 39133.7   | 39023.92  |
| 29336.52  | 29001.99  | 51809.59  | 39547.77  | 30936.7   | 56977.75  | 24749.38  | 28235.81  | 39333.53  | 37578.34  |

|           |           |           |           |           |           |           |           |           |           |
|-----------|-----------|-----------|-----------|-----------|-----------|-----------|-----------|-----------|-----------|
| LN371.901 | LN371.901 | LN371.901 | LN371.901 | LN371.901 | LN371.901 | LN371.900 | LN371.900 | LN371.901 | LN371.901 |
| 35564.37  | 41000.04  | 20271.8   | 26092.68  | 39016.5   | 27749.02  | 43067.14  | 40664.47  | 36973.21  | 20967.12  |
| 38473.17  | 44329.51  | 21946.52  | 26833.81  | 41686.24  | 31789.12  | 42027.97  | 43143.25  | 40459.34  | 21659.16  |
| 31617.64  | 43441.22  | 20727.83  | 24137.71  | 39646.22  | 29354.48  | 43243.75  | 39649.11  | 34389.4   | 21867.43  |
| 35254.11  | 45806.46  | 19698.11  | 22612.08  | 42445.12  | 28395.34  | 44930.7   | 41019.16  | 33132.73  | 21199.2   |
| 33187.06  | 38487.57  | 21873.43  | 23572.97  | 38802.84  | 25803.48  | 38321.37  | 39772.97  | 35366.38  | 23108.14  |

|           |           |           |           |           |           |           |           |           |           |
|-----------|-----------|-----------|-----------|-----------|-----------|-----------|-----------|-----------|-----------|
| LN371.900 | LN371.900 | LN371.901 | LN371.900 | LN371.900 | LN371.900 | LN371.901 | LN371.901 | LN371.901 | LN371.901 |
| 27215.27  | 58251.92  | 40677.62  | 37556.63  | 55299.71  | 35026.05  | 27799.09  | 28667.89  | 30846.61  | 37142.48  |
| 25309.68  | 57452.3   | 38901.69  | 39985.1   | 54881.01  | 38260.64  | 30397.77  | 26959.48  | 35472.65  | 41890.35  |
| 23268.73  | 58115.09  | 38805.08  | 38005.62  | 52324.13  | 38019.22  | 26943.24  | 24508     | 35132.25  | 39076.7   |
| 24359.42  | 56397.8   | 36926.42  | 39339.04  | 52274.33  | 36122.92  | 24924.85  | 21913.39  | 34348.97  | 39157.78  |
| 21848.13  | 58008.77  | 34715.48  | 40310.64  | 53999.15  | 38031.96  | 23992.68  | 26134.39  | 32148.03  | 40737.66  |

|           |           |           |           |           |           |           |           |           |           |
|-----------|-----------|-----------|-----------|-----------|-----------|-----------|-----------|-----------|-----------|
| LN371.901 | LN371.901 | LN371.901 | LN371.901 | LN371.901 | LN371.900 | LN371.900 | LN371.900 | LN371.901 | LN371.901 |
| 48914.04  | 36176.05  | 21474.57  | 27199.9   | 34530.28  | 38858.45  | 27611.2   | 43934.63  | 45612.63  | 23223.04  |
| 48444.92  | 39689.66  | 28723.64  | 27896.76  | 39418.59  | 41083.48  | 31927.62  | 43298.21  | 42843.52  | 25297.49  |
| 47713.27  | 36587.87  | 23931.61  | 29561.25  | 34364.53  | 35870.99  | 27341.95  | 44469.29  | 39180.65  | 23861.22  |
| 53544.88  | 33751.52  | 20638.08  | 23813.06  | 31962.68  | 36030.18  | 32120.25  | 41929.03  | 39312.67  | 20695.6   |
| 45808.24  | 36528.43  | 23405.93  | 28141.7   | 36224.52  | 36891.38  | 33505.55  | 39165.87  | 41939.96  | 23455.05  |



|           |           |           |           |           |           |           |           |           |           |
|-----------|-----------|-----------|-----------|-----------|-----------|-----------|-----------|-----------|-----------|
| LN371.900 | LN371.901 | LN371.900 | LN371.901 | LN371.900 | LN371.900 | LN371.900 | LN371.901 | LN371.900 | LN371.901 |
| 31728     | 49305.62  | 35466.67  | 32371.98  | 50474.93  | 21891.74  | 41586.91  | 42511.45  | 28348.67  | 39966.01  |
| 30366.91  | 48003.4   | 38171.74  | 37230.47  | 52577.62  | 24409.56  | 46306.67  | 44238.92  | 27663.3   | 43645.77  |
| 33313.17  | 50209.97  | 35709.74  | 35854.98  | 50320.7   | 22601.91  | 44239.51  | 42629.87  | 25194.22  | 37204.78  |
| 31592.82  | 48730     | 35545.99  | 38993.12  | 45853.12  | 23924.23  | 41230.78  | 41029.55  | 25964.39  | 42089.02  |
| 30785.1   | 47993     | 35248.2   | 33676.78  | 44662.25  | 22514.11  | 42702.5   | 43935.79  | 25165.92  | 36917.87  |

|           |           |           |           |           |           |           |           |           |           |
|-----------|-----------|-----------|-----------|-----------|-----------|-----------|-----------|-----------|-----------|
| LN371.900 | LN371.900 | LN371.900 | LN371.900 | LN371.901 | LN371.901 | LN371.901 | LN371.900 | LN371.900 | LN371.901 |
| 39348.03  | 18191.85  | 36930.23  | 48943.85  | 26190.41  | 30168.49  | 42008.38  | 18307.63  | 49129.33  | 44002.78  |
| 43076.53  | 18633.47  | 34544.94  | 50817.88  | 28456.55  | 31607.27  | 46013.64  | 22858.47  | 49818.19  | 49405.29  |
| 38430.96  | 17372.42  | 36046.05  | 47339.62  | 26410.23  | 33187.08  | 46782.78  | 20851.18  | 42715.97  | 46629.27  |
| 41654.11  | 18211.52  | 34736.18  | 49856.29  | 26195.01  | 29956.28  | 42860.18  | 18465.68  | 43751.94  | 47234.34  |
| 42297.42  | 14050.46  | 39550.8   | 48232.02  | 24860.09  | 27223.19  | 45657.75  | 20477.92  | 47384.76  | 45738.69  |

|           |           |           |           |           |           |           |           |           |           |
|-----------|-----------|-----------|-----------|-----------|-----------|-----------|-----------|-----------|-----------|
| LN371.901 | LN371.901 | LN371.900 | LN371.901 | LN371.901 | LN371.900 | LN371.901 | LN371.900 | LN371.901 | LN371.901 |
| 28715.84  | 31083.29  | 36567.29  | 29413.22  | 52772.83  | 52097.75  | 25345.94  | 24713.97  | 27514.48  | 46474.13  |
| 30643.01  | 35440.24  | 37993.73  | 35115.55  | 53263.16  | 52062.85  | 24952.77  | 26981.94  | 29309.27  | 52623.35  |
| 29705.71  | 30735.5   | 35125.45  | 29745.61  | 50220.93  | 51351.86  | 26021.16  | 26906.49  | 24970.35  | 44869.35  |
| 27679.93  | 29561.06  | 39566.98  | 31533.5   | 50865.58  | 50678.23  | 24440.52  | 25461.13  | 24388.13  | 42004.82  |
| 28421.56  | 30867.63  | 31705.31  | 29141.03  | 43487.06  | 49195.59  | 25770.61  | 25642.94  | 23729.08  | 45005.38  |

|           |           |           |           |           |           |           |           |           |           |
|-----------|-----------|-----------|-----------|-----------|-----------|-----------|-----------|-----------|-----------|
| LN371.901 | LN372.895 | LN372.991 | LN372.991 | LN372.991 | LN372.992 | LN372.991 | LN372.991 | LN372.991 | LN372.991 |
| 59388.68  | 20085.94  | 47894.34  | 58550.26  | 79949.75  | 68194.08  | 74908.09  | 82382.36  | 34645.83  | 46750.68  |
| 58482.46  | 17661.24  | 50539.08  | 56371.48  | 76652.54  | 70727.92  | 71608.09  | 83990.87  | 33761.49  | 45250.58  |
| 62421.02  | 17630.97  | 49025.5   | 55198.54  | 76783.23  | 66160.2   | 72097.07  | 88995.96  | 32511.1   | 50808.21  |
| 56677.27  | 16199.21  | 51998.12  | 57895.6   | 75495.47  | 59576.22  | 76085.16  | 88035.87  | 35277.18  | 38601.9   |
| 61666.81  | 18800.53  | 28724.83  | 56937.25  | 84972.39  | 67418.82  | 35944.74  | 85141.47  | 18646.07  | 41393.74  |

|           |           |           |           |           |           |           |           |           |           |
|-----------|-----------|-----------|-----------|-----------|-----------|-----------|-----------|-----------|-----------|
| LN372.991 | LN372.991 | LN372.991 | LN372.991 | LN372.992 | LN372.991 | LN372.991 | LN372.991 | LN372.991 | LN372.991 |
| 38915.29  | 63980.12  | 51261.62  | 108613.5  | 48135.28  | 94155.22  | 57837.46  | 109981.9  | 49751.37  | 89479.84  |
| 37690.17  | 61293.9   | 80898.63  | 110162    | 44583.07  | 88481.5   | 64280.06  | 100513.2  | 46887.96  | 97422.55  |
| 35253.04  | 62679.66  | 91114.45  | 106303.8  | 43909.66  | 85085.03  | 55330.06  | 103019.4  | 48150.86  | 89910.2   |
| 36673.93  | 62218.33  | 88426.57  | 105138.9  | 44093.27  | 82944.27  | 60346.8   | 96766.05  | 51759.87  | 88854.69  |
| 21541.09  | 65132.38  | 75299.39  | 105556.1  | 44966.5   | 93842.4   | 65105.26  | 92609.78  | 57504.88  | 86873.04  |

|           |           |           |           |           |           |           |           |           |           |
|-----------|-----------|-----------|-----------|-----------|-----------|-----------|-----------|-----------|-----------|
| LN372.992 | LN372.991 | LN372.991 | LN372.992 | LN372.991 | LN372.991 | LN372.991 | LN372.991 | LN372.991 | LN372.992 |
| 35954.09  | 40373.97  | 57681.36  | 89097.88  | 78015.58  | 63951.54  | 49367.26  | 52017.79  | 85728.95  | 69068.28  |
| 38790.84  | 43616.84  | 62120.36  | 98581.45  | 77526.31  | 63657.24  | 53701.13  | 51209.8   | 81269.25  | 68525.48  |
| 41629.35  | 44314.38  | 56321.7   | 83454.23  | 82976.86  | 58905.41  | 51346.71  | 50918.71  | 82223.35  | 65036.45  |
| 41640.04  | 48006.32  | 57773.65  | 89314.72  | 70251.25  | 66694.16  | 49671.45  | 52501.86  | 84670.99  | 63015.5   |
| 36252.52  | 47676.56  | 55984.25  | 75237.24  | 69468.88  | 58779.2   | 43951.13  | 49628     | 85701.2   | 65815     |

|           |           |           |           |           |           |           |           |           |           |
|-----------|-----------|-----------|-----------|-----------|-----------|-----------|-----------|-----------|-----------|
| LN372.991 | LN372.991 | LN372.991 | LN372.991 | LN372.991 | LN372.992 | LN372.991 | LN372.991 | LN372.991 | LN372.991 |
| 96840.87  | 44651.35  | 104395.8  | 92094.17  | 108660.6  | 66721.25  | 24618.65  | 51931.39  | 35454.08  | 74103.12  |
| 96434.93  | 42054.46  | 106739.3  | 87719.21  | 110809.5  | 68863.39  | 25360.31  | 50724.07  | 37599.1   | 83859.35  |
| 96075.22  | 43000.2   | 100991.5  | 87230.08  | 112721.4  | 66415.13  | 24589.55  | 49117.45  | 34736.82  | 82880.28  |
| 101927.5  | 39835.11  | 99813.41  | 91465.53  | 112989.3  | 75318.88  | 22599.43  | 50933.92  | 38229.52  | 80473.09  |
| 88167.37  | 36793.22  | 104575.5  | 87182.28  | 109446.5  | 68250.12  | 21566.23  | 53292.96  | 39991.92  | 71480.86  |

|           |           |           |           |           |           |           |           |           |           |
|-----------|-----------|-----------|-----------|-----------|-----------|-----------|-----------|-----------|-----------|
| LN372.992 | LN372.991 | LN372.991 | LN372.992 | LN372.991 | LN372.992 | LN372.991 | LN372.991 | LN372.991 | LN372.991 |
| 78150.02  | 77600.84  | 81243.42  | 51140.48  | 51199.9   | 63692.05  | 60461.3   | 87827.28  | 63065.29  | 31225.18  |
| 77579.96  | 78710.99  | 77826.42  | 50949.75  | 52206.78  | 56754.23  | 61035.5   | 101972.9  | 62586.96  | 31964.02  |
| 81387.72  | 83796.91  | 81402.34  | 48263.82  | 54478.44  | 61840.75  | 61061.84  | 82613.04  | 62116.51  | 25458.65  |
| 80611.49  | 78699.94  | 80123.19  | 52167.91  | 50631.71  | 62026.85  | 59974.17  | 92406.36  | 61767.84  | 29932.62  |
| 80647.92  | 72879.99  | 79202.5   | 47480.83  | 50829.86  | 58713.07  | 65305.65  | 88697.35  | 61034.08  | 25084.23  |



|           |           |           |           |           |           |           |           |           |           |
|-----------|-----------|-----------|-----------|-----------|-----------|-----------|-----------|-----------|-----------|
| LN372.991 | LN372.992 | LN372.992 | LN372.991 | LN372.991 | LN372.992 | LN372.992 | LN372.991 | LN372.991 | LN372.991 |
| 43451.39  | 26776.28  | 65568.05  | 61027.43  | 75672.15  | 42673.88  | 67807.36  | 47283.98  | 84898.2   | 92145.91  |
| 42683.04  | 24010.58  | 69316.85  | 61226.31  | 76529.16  | 41253.48  | 64790.31  | 44973.49  | 85860.68  | 90700.05  |
| 47184.28  | 31031.7   | 65694.5   | 53205.83  | 76401.86  | 48017.1   | 76421.8   | 44410.33  | 84876.28  | 89083.81  |
| 44343.56  | 26474.29  | 70714.98  | 57207.14  | 78333.42  | 44792.47  | 68530.39  | 38416.19  | 85261.12  | 85940.12  |
| 47305     | 30346.64  | 66755.84  | 58798.21  | 77652.9   | 44489.21  | 62921.82  | 43984.73  | 76958.91  | 79150.1   |

|           |           |           |           |           |           |           |           |           |           |
|-----------|-----------|-----------|-----------|-----------|-----------|-----------|-----------|-----------|-----------|
| LN372.992 | LN372.991 | LN372.991 | LN372.991 | LN372.992 | LN372.992 | LN372.991 | LN372.991 | LN372.991 | LN372.991 |
| 21141.01  | 102701.3  | 149934.3  | 59661.76  | 56506.84  | 30986.7   | 83609.44  | 97828.55  | 34195.71  | 69091.18  |
| 21852.99  | 104585.3  | 144664.1  | 62790.62  | 56820.26  | 32814.53  | 81662.6   | 99818.96  | 36105.72  | 70671.41  |
| 22917.14  | 103678.3  | 148493.4  | 59277.48  | 56822.71  | 37825.34  | 80309.89  | 99480.71  | 35853.8   | 73583.66  |
| 20861.34  | 107735.4  | 146614.7  | 64685.9   | 57296.45  | 31419.66  | 84961.34  | 101208    | 36458.5   | 70106.43  |
| 24072.61  | 98174.13  | 136555.9  | 58303.2   | 56854.84  | 32539.9   | 81516.12  | 91011.16  | 37665.41  | 73142.81  |

|           |           |           |           |           |           |           |           |           |           |
|-----------|-----------|-----------|-----------|-----------|-----------|-----------|-----------|-----------|-----------|
| LN372.991 | LN372.992 | LN372.992 | LN372.991 | LN372.991 | LN372.992 | LN372.991 | LN372.991 | LN372.991 | LN372.991 |
| 46749.15  | 48659.41  | 32462.41  | 83832.23  | 141573    | 52064.05  | 71654.13  | 50819.77  | 114700.3  | 23785.41  |
| 45440.98  | 41943.98  | 34828.33  | 85770.51  | 148064.5  | 55093.48  | 74605.38  | 57311.37  | 117167.4  | 20159.89  |
| 48992.35  | 43994.98  | 34383.39  | 86935.79  | 138213.1  | 58436.85  | 73479.63  | 54394.14  | 117304    | 16638.34  |
| 42375.99  | 43856.47  | 35315.08  | 75197.63  | 131830    | 53546.41  | 75767.62  | 59444.52  | 116405.6  | 20679.49  |
| 48313.53  | 41758.3   | 34866.08  | 75153.07  | 139742.3  | 55642.13  | 73639.99  | 52038.25  | 121514.1  | 19041.76  |

|           |           |           |           |           |           |           |           |           |           |
|-----------|-----------|-----------|-----------|-----------|-----------|-----------|-----------|-----------|-----------|
| LN372.991 | LN372.991 | LN372.991 | LN373.009 | LN373.010 | LN373.010 | LN373.010 | LN373.010 | LN373.010 | LN373.010 |
| 57963.75  | 68236.19  | 18650.62  | 128847.1  | 88768.44  | 62048.96  | 96316.84  | 108980.2  | 50146.66  | 138314.4  |
| 60581.55  | 70355.09  | 21818.66  | 164985.9  | 75816.5   | 103666.5  | 105095.9  | 78993.65  | 61349.91  | 148131.7  |
| 55366.65  | 82157.53  | 18721.06  | 132251    | 51040.68  | 170050.1  | 121801.6  | 77199.92  | 44545.09  | 77319.45  |
| 55779.26  | 71888.9   | 16547.92  | 90706.01  | 59968.55  | 86158.37  | 71546.68  | 87864.89  | 97680.64  | 118486.5  |
| 63740.97  | 77256.68  | 20254.61  | 177040.3  | 70885.07  | 91459.05  | 96593     | 108329    | 51043.16  | 62785.06  |

|           |           |           |           |           |           |           |           |           |           |
|-----------|-----------|-----------|-----------|-----------|-----------|-----------|-----------|-----------|-----------|
| LN373.010 | LN373.010 | LN373.010 | LN373.010 | LN373.010 | LN373.01_ | LN373.010 | LN373.010 | LN373.010 | LN373.010 |
| 71146.13  | 94367.12  | 25586.31  | 97316.14  | 151802.5  | 136145.2  | 75638.52  | 51305.44  | 34414.59  | 176518.5  |
| 88112.78  | 125658.8  | 22028.95  | 94796.26  | 103649.3  | 177572.6  | 64458.95  | 61730.85  | 67782.17  | 150417.3  |
| 76369.47  | 79503.84  | 15020.3   | 99251     | 114122.5  | 137605.1  | 47693.89  | 58495.34  | 46575.24  | 154561.4  |
| 77380.52  | 72696.43  | 14154.31  | 69211.35  | 112610    | 126584.3  | 55784.67  | 72921.67  | 40558.01  | 143729.5  |
| 91352.13  | 95265.06  | 16980.19  | 82865.89  | 113587.7  | 103397.3  | 87990.03  | 50170.32  | 52507.31  | 154969.5  |

|           |           |           |           |           |           |           |           |           |           |
|-----------|-----------|-----------|-----------|-----------|-----------|-----------|-----------|-----------|-----------|
| LN373.009 | LN373.010 | LN373.010 | LN373.01_ | LN373.010 | LN373.010 | LN373.010 | LN373.01_ | LN373.010 | LN373.010 |
| 115887    | 60174.54  | 67710.13  | 165766.1  | 65918.68  | 123163.1  | 69022.92  | 107378.8  | 74224.51  | 107014.4  |
| 192731.5  | 47829.35  | 71013.07  | 120136.3  | 63352.44  | 160206.1  | 70074.76  | 107418.4  | 51963.22  | 110686.1  |
| 119671.1  | 63373.25  | 70049.14  | 126921.4  | 55661.69  | 159516.7  | 79871.6   | 170450    | 76469.94  | 78661.43  |
| 130376.5  | 57435.26  | 74088.59  | 168218.5  | 53607.99  | 95973.49  | 83301.31  | 117845.6  | 58194.29  | 100155.3  |
| 173974.5  | 51570.44  | 73729.55  | 100164.1  | 45746.48  | 73099.76  | 85294.39  | 129707.2  | 59274.01  | 125408.8  |

|           |           |           |           |           |           |           |           |           |           |
|-----------|-----------|-----------|-----------|-----------|-----------|-----------|-----------|-----------|-----------|
| LN373.010 |
| 59283.52  | 110402.9  | 164032.8  | 80585.56  | 71917.26  | 112888    | 77287.06  | 58983.92  | 40663.68  | 92302.8   |
| 64276.03  | 84248.55  | 117637.5  | 68124.39  | 72817.14  | 120014.1  | 86649.29  | 66611.22  | 51087.6   | 88412.14  |
| 44080     | 116230.6  | 107557.9  | 65048.98  | 72745.73  | 93275.3   | 75258.09  | 53472.38  | 43701.16  | 98116.14  |
| 50252.54  | 110032.3  | 114584    | 90497.26  | 65777.7   | 74093.11  | 99682.54  | 83815.65  | 59684.96  | 98066.18  |
| 47915.83  | 67351.38  | 121597.2  | 130788.6  | 59878.68  | 94679.97  | 82636.73  | 56987.74  | 59642.16  | 88257.5   |

|           |           |           |           |           |           |           |           |           |           |
|-----------|-----------|-----------|-----------|-----------|-----------|-----------|-----------|-----------|-----------|
| LN373.010 |
| 84929.16  | 53541.27  | 70460.98  | 71893.14  | 32216.74  | 106861.7  | 73293.18  | 22966.82  | 158781.3  | 46749.41  |
| 112143.4  | 67662.59  | 56565.19  | 59196.57  | 25653.47  | 103513    | 51921.05  | 29960.32  | 97068.07  | 67769.91  |
| 107197.3  | 53552.97  | 105347.1  | 81288.1   | 37136.06  | 85060.75  | 68629.56  | 38757.33  | 103469.3  | 64217.37  |
| 155051.8  | 57608.27  | 49579.48  | 62235.48  | 23610.97  | 129279.7  | 61970.55  | 39602.5   | 112113.5  | 58655.37  |
| 80409.09  | 66137.15  | 87575.38  | 55947.85  | 30513.22  | 95177.52  | 51984.93  | 29711.73  | 106916.4  | 39015.61  |



|           |           |           |           |           |           |           |           |           |           |
|-----------|-----------|-----------|-----------|-----------|-----------|-----------|-----------|-----------|-----------|
| LN373.010 | LN373.010 | LN373.010 | LN373.010 | LN373.010 | LN373.01_ | LN373.010 | LN373.010 | LN373.010 | LN373.010 |
| 65316.78  | 129902.2  | 78911.97  | 37666.45  | 67114.2   | 129622.2  | 53905.98  | 77677.76  | 102423    | 49258.17  |
| 71646.84  | 120678.2  | 110215.8  | 29558.81  | 56555.86  | 164409.2  | 76011.97  | 90810.22  | 87307.97  | 64366.45  |
| 47531.11  | 91508.43  | 123210.2  | 38232.75  | 91206.2   | 132708.4  | 59088.5   | 71046.61  | 71557.29  | 49865.42  |
| 66159.07  | 87847.65  | 126660.5  | 50404.6   | 76477.36  | 128966.9  | 50677.76  | 107896.6  | 76510.96  | 60760.31  |
| 75673.78  | 108575.9  | 96807.42  | 37474.28  | 78994.09  | 134816.7  | 57766.03  | 99094.44  | 73225.73  | 47367     |

|           |           |           |           |           |           |           |           |           |           |
|-----------|-----------|-----------|-----------|-----------|-----------|-----------|-----------|-----------|-----------|
| LN373.010 |
| 100136.1  | 53155.1   | 93457.18  | 65765.09  | 22697.03  | 73842.02  | 73631.91  | 38901.98  | 77773.33  | 64012.23  |
| 120553.1  | 55307.17  | 97464.18  | 102022.7  | 22373.86  | 73862.36  | 76806.65  | 43559.56  | 105711.5  | 53437.5   |
| 93607.84  | 51359.67  | 101695    | 91648.4   | 22452.86  | 59103.93  | 66002.93  | 44151.23  | 141830.1  | 50155.62  |
| 69441.57  | 56663.46  | 90476.77  | 59301.61  | 28243.86  | 144278.2  | 82340.15  | 33075.02  | 98880.09  | 45480.67  |
| 103063.6  | 86638.98  | 107712.2  | 73982.57  | 21836.17  | 82972.64  | 67309.02  | 31272.17  | 83774.38  | 61728.7   |

|           |           |           |           |           |           |           |           |           |           |
|-----------|-----------|-----------|-----------|-----------|-----------|-----------|-----------|-----------|-----------|
| LN373.010 | LN373.010 | LN373.010 | LN373.010 | LN373.01_ | LN373.010 | LN373.010 | LN373.010 | LN373.010 | LN373.010 |
| 26285.23  | 82241.93  | 53449.03  | 33465.62  | 121004.5  | 130585.1  | 70364.87  | 30957.95  | 75971.17  | 27400.4   |
| 40385.6   | 69114.06  | 54316.11  | 34689.57  | 156857.4  | 86642.63  | 100648.4  | 42333.05  | 52706.31  | 26862.74  |
| 39258.61  | 61982.57  | 65428.54  | 25533.57  | 158798    | 78370.84  | 90763.18  | 42915.88  | 45926.2   | 32494.36  |
| 29963.93  | 51365.58  | 50635.62  | 24605.92  | 135195.6  | 98122.29  | 90278.58  | 35468.2   | 65337.93  | 33052.92  |
| 31301.06  | 58841.65  | 50022.58  | 26652.53  | 170595.5  | 119013.9  | 67097.96  | 36494.28  | 56153.51  | 27342.31  |

|           |           |           |           |           |           |           |           |           |           |
|-----------|-----------|-----------|-----------|-----------|-----------|-----------|-----------|-----------|-----------|
| LN373.010 | LN374.893 | LN374.906 |
| 43944.86  | 86860.49  | 33248.65  | 98017.5   | 66068.66  | 39745.58  | 123937.8  | 61640.22  | 35099.75  | 82899.84  |
| 34430.9   | 64271.13  | 34284.13  | 110996.6  | 58628.39  | 46683.91  | 73623.81  | 46929.87  | 36284.31  | 77988.28  |
| 33927.36  | 59212.29  | 43950     | 81348.74  | 64426.66  | 40963.59  | 121063.3  | 47204.12  | 19526.59  | 82356.2   |
| 27689.03  | 72685.46  | 36510.03  | 135460.5  | 107061.9  | 35669.11  | 97884.73  | 63172.41  | 26325.22  | 77687.36  |
| 36355.35  | 66080.93  | 39940.26  | 118983.4  | 83728.46  | 46904.37  | 83622.73  | 50394.02  | 51121.86  | 85214.41  |

|           |           |           |           |           |           |           |           |           |           |
|-----------|-----------|-----------|-----------|-----------|-----------|-----------|-----------|-----------|-----------|
| LN374.906 | LN374.906 | LN374.906 | LN374.988 | LN374.989 | LN374.989 | LN374.989 | LN374.989 | LN374.988 | LN374.989 |
| 59761.87  | 165460.6  | 175471.8  | 55250.2   | 39084.94  | 32887.75  | 37585.52  | 32428.34  | 46439.98  | 30314.86  |
| 58211.32  | 186623.6  | 178912    | 36289.32  | 29562.18  | 31433.02  | 39284.23  | 27199.46  | 42802.54  | 26799.66  |
| 65574.42  | 171050    | 171654.2  | 36247.94  | 33193.6   | 37702.4   | 33965.19  | 29711.19  | 32534.9   | 29670.58  |
| 70502.62  | 174412    | 173835.2  | 43941.66  | 32884.77  | 39988.54  | 34341.75  | 25710.66  | 27025.97  | 37941.2   |
| 65765.05  | 183358.1  | 149458.2  | 44646.01  | 36984.65  | 39793.55  | 29082.04  | 39530.2   | 27413.69  | 33302.92  |

|           |           |           |           |           |           |           |           |           |           |
|-----------|-----------|-----------|-----------|-----------|-----------|-----------|-----------|-----------|-----------|
| LN374.989 |
| 42854.32  | 23642.18  | 18398.95  | 64041.28  | 37761.75  | 40376.36  | 48721.48  | 22714.97  | 41841.69  | 46293.74  |
| 59364.7   | 34004.15  | 13680.62  | 46409.14  | 40993.99  | 46717.19  | 46591.1   | 30443.6   | 38935.04  | 40168.93  |
| 44098.17  | 28420.91  | 16965.54  | 34860.7   | 36259.63  | 36740.71  | 38832.86  | 26441.03  | 44462.51  | 35598.98  |
| 34194.21  | 25356.93  | 23384.86  | 52659.54  | 36496.16  | 40825.25  | 54534.71  | 24801.92  | 36517.87  | 31429.56  |
| 46509.48  | 29170.04  | 19505.16  | 50133.25  | 30309.08  | 34488.26  | 47861.78  | 20111.43  | 62436.81  | 46497.02  |

|           |           |           |           |           |           |           |           |           |           |
|-----------|-----------|-----------|-----------|-----------|-----------|-----------|-----------|-----------|-----------|
| LN374.988 | LN374.989 | LN374.988 | LN374.988 |
| 13439.08  | 33716.35  | 34813.55  | 16063.86  | 21359.78  | 26696.75  | 25338.4   | 30556.07  | 50825.63  | 57907.05  |
| 20823.72  | 38341.9   | 30886.7   | 19659.95  | 15701.12  | 36135.4   | 23654.41  | 24521.16  | 57048.87  | 46777.37  |
| 17657.36  | 32098.53  | 45053.97  | 13577.8   | 16982.47  | 27958.07  | 21618.68  | 28686.91  | 58234.1   | 45721.72  |
| 16447.32  | 27100.73  | 46722.6   | 15112.57  | 15886.5   | 26971.56  | 24871.25  | 29138.34  | 58857.99  | 60034.3   |
| 18341.17  | 24342.93  | 52125.21  | 16915.15  | 18173.55  | 21318.31  | 20569.08  | 25918.44  | 50644.79  | 60803.83  |

|           |           |           |           |           |           |           |           |           |           |
|-----------|-----------|-----------|-----------|-----------|-----------|-----------|-----------|-----------|-----------|
| LN374.989 | LN374.989 | LN374.989 | LN374.988 | LN374.988 | LN374.988 | LN374.989 | LN374.989 | LN374.989 | LN374.988 |
| 50114.64  | 18994.16  | 24609.55  | 51901.24  | 41845.48  | 61009.9   | 32024.61  | 28942.88  | 30335.42  | 51832.25  |
| 53004.99  | 16592.59  | 35090.5   | 49050.79  | 58640.93  | 48013.74  | 48552.44  | 34793.89  | 20125.64  | 55832.45  |
| 44369.09  | 16470.81  | 31992.77  | 50627.89  | 42808.82  | 48568.62  | 28792.92  | 30040.12  | 22178.09  | 51814.48  |
| 56446.58  | 21107.34  | 31454.93  | 45503.31  | 56067.26  | 51783.61  | 32820.31  | 45071.34  | 23319.59  | 49240.72  |
| 59397.62  | 16538.75  | 41249.96  | 49153.29  | 47008.31  | 48028.31  | 30464.86  | 25603.11  | 22643.31  | 55081.94  |



|           |           |           |           |           |           |           |           |           |           |
|-----------|-----------|-----------|-----------|-----------|-----------|-----------|-----------|-----------|-----------|
| LN374.989 | LN374.989 | LN374.989 | LN374.988 | LN374.988 | LN374.988 | LN374.988 | LN374.989 | LN374.989 | LN374.989 |
| 52776.67  | 37037.81  | 32975.46  | 33551.14  | 69388.66  | 34947.73  | 69580.52  | 32731.89  | 14672.51  | 42490.38  |
| 37880.77  | 43128.8   | 37396.21  | 39756.71  | 74031.83  | 59733.7   | 67724.6   | 47162.26  | 17185.79  | 38790.92  |
| 42524.48  | 43346.77  | 31837.82  | 37127.25  | 59277.57  | 44993.3   | 55833.41  | 36891.81  | 16120.29  | 40302.44  |
| 30584.81  | 36751.85  | 21277.74  | 42516.9   | 58127.75  | 35782.16  | 73744.43  | 36693     | 17223.3   | 52748.63  |
| 34768.67  | 37372.43  | 29801.78  | 39094.52  | 46222.35  | 46651.33  | 54715.2   | 53857.13  | 13224.23  | 39299.46  |

|           |           |           |           |           |           |           |           |           |           |
|-----------|-----------|-----------|-----------|-----------|-----------|-----------|-----------|-----------|-----------|
| LN374.989 | LN374.988 | LN374.989 | LN374.989 | LN374.989 | LN374.989 | LN374.989 | LN374.988 | LN374.989 | LN374.989 |
| 52660.25  | 68961.2   | 33208.91  | 41759.28  | 32870.01  | 29915.66  | 20729.64  | 39091.44  | 35545.83  | 24375.94  |
| 31852.15  | 93858.19  | 43647.32  | 29891.48  | 36212.52  | 33758.25  | 14883.85  | 34658.06  | 31888.56  | 18818.73  |
| 45166.17  | 58620.92  | 44615.06  | 37233.01  | 26334.95  | 22576.99  | 16910.26  | 42530.16  | 24688.72  | 19404.95  |
| 43201.43  | 45119.42  | 58062.46  | 33291.72  | 24930.39  | 30685.08  | 20863     | 29423.83  | 24607.4   | 18994.49  |
| 51543.22  | 88372.55  | 41167.12  | 27765.75  | 24674.17  | 30613.52  | 15909.91  | 42418.12  | 45229.86  | 19102.25  |

|           |           |           |           |           |           |           |           |           |           |
|-----------|-----------|-----------|-----------|-----------|-----------|-----------|-----------|-----------|-----------|
| LN374.989 | LN374.989 | LN374.988 | LN374.989 | LN374.989 | LN374.989 | LN374.988 | LN374.989 | LN374.988 | LN374.989 |
| 24090.06  | 21267.94  | 58897.94  | 28114.26  | 24357.03  | 55150.88  | 33602.37  | 31835.53  | 43805.49  | 42327.46  |
| 42430.73  | 27635.38  | 52489.7   | 29630.47  | 20950.51  | 49946.11  | 59723.99  | 41427.68  | 45822.04  | 29150.41  |
| 30747.11  | 21147.49  | 56201.7   | 28596.29  | 18543.36  | 41548.78  | 52588.1   | 27801.38  | 43741.42  | 30688.96  |
| 41230.92  | 20677.48  | 42725.81  | 30019.17  | 12820.45  | 41966.95  | 39648.07  | 30962.32  | 48728.1   | 26313.72  |
| 30847.74  | 31426.28  | 70954.01  | 29177.48  | 22707.3   | 42099.9   | 42811.67  | 36480.84  | 40434.35  | 35136.95  |

|           |           |           |           |           |           |           |           |           |           |
|-----------|-----------|-----------|-----------|-----------|-----------|-----------|-----------|-----------|-----------|
| LN374.989 | LN374.989 | LN374.989 | LN374.989 | LN374.989 | LN374.988 | LN374.989 | LN374.989 | LN374.988 | LN374.988 |
| 45620.82  | 41380.49  | 44935.36  | 47588.14  | 31688.21  | 45674.37  | 42149.26  | 17010.87  | 62754     | 56000.6   |
| 29427.64  | 26471.46  | 48127.63  | 47241.97  | 28816.7   | 57948.1   | 66284.34  | 18116.74  | 73858.15  | 81316.74  |
| 37358.68  | 28860.39  | 43552.67  | 54953.99  | 34220.63  | 53549.89  | 40667.84  | 20680.71  | 49971.34  | 64288.3   |
| 50069.66  | 27397.61  | 47424.8   | 61736.28  | 30693.59  | 43243.67  | 58638.56  | 19551.6   | 53994.23  | 68948.38  |
| 37503.1   | 29842.97  | 39024.9   | 43638.67  | 37032.93  | 46914.41  | 57001.41  | 26517.38  | 58408.56  | 82667.27  |

|           |           |           |           |           |           |           |           |           |           |
|-----------|-----------|-----------|-----------|-----------|-----------|-----------|-----------|-----------|-----------|
| LN374.989 | LN374.989 | LN374.989 | LN374.989 | LN375.275 | LN375.843 | LN376.442 | LN376.851 | LN376.902 | LN376.902 |
| 53068.82  | 35456.54  | 18893.03  | 28264     | 15194.79  | 45130.15  | 17556.49  | 36149.25  | 40264.58  | 58612.93  |
| 50034.2   | 37977.55  | 20913.3   | 45862.06  | 22877.95  | 52985.6   | 20977.33  | 27952.62  | 43083.46  | 63783.85  |
| 46372.06  | 27936.52  | 18835.43  | 25966.4   | 24425.39  | 51183.52  | 18330.24  | 41863.47  | 45599.21  | 56642.74  |
| 59093.42  | 25931.63  | 24239.61  | 38417.04  | 26265.12  | 42175.94  | 15696.77  | 35157.78  | 40503.87  | 57198.53  |
| 39566.04  | 24802.36  | 17126.15  | 28177.09  | 26683.49  | 53451.48  | 13263.9   | 59564.45  | 39359.84  | 54826.31  |

|           |           |           |           |           |           |           |           |           |           |
|-----------|-----------|-----------|-----------|-----------|-----------|-----------|-----------|-----------|-----------|
| LN376.903 |
| 33786.8   | 42343.29  | 27579.23  | 56423.83  | 44760.14  | 40761.15  | 37738.12  | 26085.25  | 28726.11  | 46736.18  |
| 37317.15  | 45012.22  | 27053.54  | 53220.52  | 44338.73  | 40408.03  | 37704.77  | 23774.32  | 33470.78  | 44214.5   |
| 31742.04  | 45343.93  | 30933.35  | 55699.55  | 38366.99  | 37972.35  | 39888.09  | 26100.31  | 27563.09  | 45092.59  |
| 35422.91  | 40535.22  | 25138.21  | 55473.94  | 40535.87  | 37053.77  | 36057.68  | 24873.89  | 28374.35  | 44548.49  |
| 34802.72  | 41077.88  | 26470.43  | 59595.28  | 41154.59  | 37667.73  | 35967.55  | 23634.26  | 30167.1   | 43238.63  |

|           |           |           |           |           |           |           |           |           |           |
|-----------|-----------|-----------|-----------|-----------|-----------|-----------|-----------|-----------|-----------|
| LN376.903 |
| 35951.65  | 42586.19  | 35207.52  | 40259.8   | 35045.1   | 39272.6   | 27574.11  | 32383.49  | 39520.88  | 34580.96  |
| 36894.63  | 44329.38  | 35406.47  | 39460.5   | 36094.34  | 33109.08  | 30780.61  | 32874.34  | 41154.48  | 39775.79  |
| 32998.34  | 46898.46  | 32453.51  | 40600.79  | 37631.76  | 40094.12  | 26930.77  | 32417.07  | 39751.34  | 32103.23  |
| 33369.14  | 42447.82  | 31077.29  | 44145.29  | 34694.31  | 37234.35  | 27898.17  | 29138.32  | 42694.19  | 37211.67  |
| 33252.33  | 45380.75  | 38419.81  | 35660.72  | 35557.86  | 35563.72  | 30025.39  | 33115.7   | 39256.37  | 36433.81  |

|           |           |           |           |           |           |           |           |           |           |
|-----------|-----------|-----------|-----------|-----------|-----------|-----------|-----------|-----------|-----------|
| LN376.903 |
| 31657.88  | 26933.14  | 19167.94  | 55328.78  | 55308.66  | 38617.16  | 45542.01  | 43137.67  | 25206.9   | 31107.34  |
| 32005.2   | 26635.93  | 23095.95  | 62056.58  | 49771.15  | 37754.6   | 41401.49  | 42406.66  | 28395.2   | 29445.42  |
| 33068.05  | 27580.48  | 19536.64  | 56877.41  | 51591.89  | 36244.55  | 45487.27  | 46749.6   | 27296.98  | 26903.83  |
| 34484.04  | 26998     | 22215.07  | 57766.99  | 48493.09  | 41577.39  | 47956.94  | 51229.71  | 28619.02  | 30419.96  |
| 34115.57  | 27057.57  | 20913.37  | 59872.64  | 48339.13  | 37883.05  | 42050.51  | 48290.23  | 27305.18  | 28099.25  |



|           |           |           |           |           |           |           |           |           |           |
|-----------|-----------|-----------|-----------|-----------|-----------|-----------|-----------|-----------|-----------|
| LN376.903 |
| 26982.02  | 45190.06  | 38569.64  | 40589     | 29328.96  | 25697.25  | 42892.14  | 54494.77  | 42448.6   | 31360.69  |
| 32343.52  | 43269.34  | 34989.3   | 38423.23  | 28408.33  | 25252.09  | 40703.55  | 56226.76  | 42569.66  | 31095.64  |
| 28874.72  | 43453.45  | 35859.67  | 37118.71  | 26281.02  | 27470.39  | 35736.48  | 49356.05  | 40866.78  | 29418.35  |
| 29974.39  | 43198.62  | 33717.65  | 40931.82  | 31369.96  | 25437.86  | 37205.7   | 48406.32  | 46751.61  | 30952.58  |
| 26147.42  | 41337.16  | 31449.35  | 40386.91  | 29352.85  | 23638.02  | 35800.7   | 48281.3   | 38369.96  | 28158.42  |

|           |           |           |           |           |           |           |           |           |           |
|-----------|-----------|-----------|-----------|-----------|-----------|-----------|-----------|-----------|-----------|
| LN376.903 |
| 30174.44  | 26590.75  | 22534.64  | 31620.81  | 22617.46  | 32936.32  | 48424.25  | 60416.85  | 27717.51  | 23470.07  |
| 30089.43  | 29182.05  | 19820.12  | 31909.23  | 23234.02  | 37300.76  | 51169.67  | 57277.6   | 25458.79  | 22309.43  |
| 33075.51  | 23435.97  | 21096.19  | 30190.1   | 21741.76  | 34805.19  | 46826.62  | 55302.59  | 27488.09  | 22135.3   |
| 30535.49  | 26680.54  | 20903.09  | 30670.85  | 21904.13  | 33707.32  | 47184.36  | 57312.05  | 26339.22  | 22238.05  |
| 27503.48  | 25387.88  | 20787.97  | 28059.17  | 24948.31  | 35874.28  | 50839.93  | 58079.71  | 27796.32  | 23496.78  |

|           |           |           |           |           |           |           |           |           |           |
|-----------|-----------|-----------|-----------|-----------|-----------|-----------|-----------|-----------|-----------|
| LN376.903 | LN376.903 | LN376.985 | LN376.985 | LN376.985 | LN376.984 | LN376.985 | LN376.985 | LN376.985 | LN376.985 |
| 22442.26  | 25062.36  | 11417.96  | 35872.4   | 105772.5  | 64924.37  | 41579.2   | 75030.4   | 85824.05  | 47102.57  |
| 24900.25  | 24527.06  | 16198.68  | 55287.78  | 66162.08  | 49657.73  | 43489.25  | 97547.05  | 60261.71  | 49639.47  |
| 25554.59  | 22660.61  | 19902.9   | 53026.53  | 77719.15  | 57328.76  | 33867.52  | 77180.68  | 58235.77  | 56363.73  |
| 23558.59  | 25837.5   | 16827.01  | 36579.42  | 70071.42  | 51364.68  | 32861.8   | 91749.87  | 62505.07  | 47146.59  |
| 20693.37  | 24269.44  | 10489.11  | 56353.9   | 56714.58  | 68744.15  | 35400.22  | 80826.09  | 52833.82  | 60198.19  |

|           |           |           |           |           |           |           |           |           |           |
|-----------|-----------|-----------|-----------|-----------|-----------|-----------|-----------|-----------|-----------|
| LN376.985 |
| 32059.4   | 25538.82  | 82309.24  | 48115.64  | 58633.86  | 64547.14  | 58843.6   | 57621.82  | 35801.88  | 97400.14  |
| 25183.64  | 39585.8   | 87922.08  | 37124.31  | 52318.78  | 85194.27  | 52324.66  | 61220.82  | 56269     | 104156.4  |
| 20707.17  | 40954.09  | 74219.84  | 51552.63  | 58360.13  | 84327.11  | 68613.96  | 47317.5   | 67663.34  | 125262.9  |
| 19275.24  | 30451.63  | 50900.71  | 60390.72  | 54568.26  | 81594.38  | 71216.71  | 57030.58  | 51084.27  | 93314.81  |
| 29264.55  | 31715.41  | 71335.49  | 40372.71  | 48802.88  | 89549.12  | 79457.24  | 71756.87  | 47348.86  | 93003.16  |

|           |           |           |           |           |           |           |           |           |           |
|-----------|-----------|-----------|-----------|-----------|-----------|-----------|-----------|-----------|-----------|
| LN376.985 |
| 42431.69  | 63480.55  | 43216.88  | 86455.14  | 28173.9   | 45340.35  | 31533.55  | 44773.7   | 19865.1   | 23897.93  |
| 29547.5   | 60082.96  | 55611.73  | 115052.3  | 22837.12  | 40291.93  | 57238.36  | 34447.47  | 14077.46  | 33189.91  |
| 55811.28  | 61208.35  | 50907.02  | 100458.7  | 20927.69  | 62496.7   | 30069.8   | 31970.86  | 21719.17  | 58925.4   |
| 25311.06  | 55166.14  | 55452.37  | 117982.4  | 33474.03  | 41371.43  | 43173.6   | 36595.92  | 21653.04  | 34173.22  |
| 49341.95  | 77535.99  | 40245     | 78819.01  | 25851.77  | 36098.5   | 38410.59  | 31831.41  | 19781.36  | 40690.82  |

|           |           |           |           |           |           |           |           |           |           |
|-----------|-----------|-----------|-----------|-----------|-----------|-----------|-----------|-----------|-----------|
| LN376.985 |
| 16475.39  | 59830.29  | 65309.23  | 50838.37  | 79275.26  | 65469.12  | 68650.78  | 31216.29  | 56875.74  | 60181.76  |
| 22187.17  | 59653.47  | 67521.21  | 40110.99  | 49808.43  | 72879.41  | 74720.17  | 30257.33  | 45692.74  | 47732.62  |
| 17842.13  | 39051.45  | 68190.19  | 33855.99  | 65484.73  | 76849.63  | 48656.88  | 20822.21  | 66471.33  | 52607.1   |
| 23888.03  | 42338.86  | 69421.44  | 32224.55  | 73255.56  | 60768.94  | 68826.32  | 26907.76  | 49922.23  | 61248.94  |
| 27571.26  | 39967.98  | 51346.78  | 40315     | 102998.7  | 70174.86  | 59560.36  | 21803.96  | 64119.18  | 44358.58  |

|           |           |           |           |           |           |           |           |           |           |
|-----------|-----------|-----------|-----------|-----------|-----------|-----------|-----------|-----------|-----------|
| LN376.985 |
| 96143.62  | 85636.56  | 46547.41  | 70577.99  | 58781.43  | 36876.01  | 54071.03  | 90786.36  | 45025     | 72740.3   |
| 56044.08  | 86528     | 44817.64  | 57215.51  | 49229.96  | 33301.35  | 65485.65  | 87935.81  | 27283.62  | 73488.88  |
| 74163.21  | 86344.8   | 57532.76  | 72147.19  | 43770.93  | 33657.83  | 56098.37  | 115179.8  | 44967.49  | 85778.15  |
| 105156.6  | 90576.24  | 58363.09  | 46912.99  | 68376.11  | 28796.27  | 78649.11  | 115112    | 43694.04  | 65232.86  |
| 55851.06  | 87724.51  | 46930.75  | 69297.22  | 59418.36  | 35253.98  | 73512.62  | 97043.97  | 34112.87  | 56239.68  |

|           |           |           |           |           |           |           |           |           |           |
|-----------|-----------|-----------|-----------|-----------|-----------|-----------|-----------|-----------|-----------|
| LN376.985 |
| 43155.7   | 59300.58  | 34310.33  | 15292.23  | 48313.98  | 64340.04  | 64327.31  | 36035.35  | 24108.99  | 28518.81  |
| 46389.74  | 84802.76  | 62796.65  | 13323.02  | 41564.08  | 47947.46  | 41064.72  | 37148.91  | 28606.8   | 42127.3   |
| 57528.72  | 58282.69  | 34936.53  | 18745.69  | 64200.75  | 46308.59  | 61483.65  | 31698.01  | 27407.25  | 38240.4   |
| 55461.02  | 74526.14  | 42057.69  | 16569.58  | 36789.06  | 37211.94  | 45651.83  | 48565.98  | 23609.76  | 27762.8   |
| 42409.08  | 77125.11  | 42236.44  | 20050.04  | 44478.23  | 37689.79  | 51391.57  | 45471.75  | 17356.09  | 42344.12  |



|           |           |           |           |           |           |           |           |           |           |
|-----------|-----------|-----------|-----------|-----------|-----------|-----------|-----------|-----------|-----------|
| LN376.985 |
| 28242.15  | 83735.59  | 53660.88  | 81034.19  | 43157.96  | 77476.94  | 51053.64  | 30709.29  | 69973.77  | 54339.14  |
| 27296.79  | 45552.32  | 123290.1  | 61760.81  | 44165.43  | 54225.13  | 49269.79  | 43825.49  | 63375.34  | 46026.41  |
| 33092.69  | 49299.88  | 48923.54  | 59828.04  | 32159.35  | 44531.36  | 59406.22  | 36189.14  | 49745.94  | 50162.01  |
| 31146.38  | 67280.19  | 56483.85  | 67397.92  | 31263.48  | 53695.45  | 51855.21  | 24578.64  | 100983.3  | 47875.2   |
| 36325.83  | 82294.6   | 56403.28  | 80592.08  | 43739.49  | 65539.98  | 54901.03  | 42300.27  | 60682.82  | 39719.52  |

|           |           |           |           |           |           |           |           |           |           |
|-----------|-----------|-----------|-----------|-----------|-----------|-----------|-----------|-----------|-----------|
| LN376.985 |
| 32459.97  | 63443.52  | 42486.37  | 58746.65  | 58536.52  | 65393.56  | 46664.81  | 94862.74  | 27236.39  | 29285.66  |
| 41218.98  | 74166.66  | 36392.13  | 56680.68  | 52886.87  | 46540.72  | 78825.44  | 53641.67  | 29221.24  | 25552.88  |
| 35730.18  | 55482.07  | 41506.67  | 53659.08  | 65599.64  | 42135.28  | 45276.17  | 75707.52  | 27129.96  | 28971.74  |
| 39201.36  | 51056.45  | 66814.5   | 56427.63  | 66074.62  | 51033     | 33810.9   | 68331.45  | 28129.98  | 27458.72  |
| 42474.06  | 69867.21  | 47690.14  | 49036.14  | 38964.03  | 60100.92  | 53467.81  | 64634.36  | 37418.62  | 27389.34  |

| LN376.985 | LN376.985 | LN376.985 | LN376.985 | LN377.004 | LN377.005 | LN377.004 | LN377.005 | LN377.005 | LN377.004 |
|-----------|-----------|-----------|-----------|-----------|-----------|-----------|-----------|-----------|-----------|
| 85581.29  | 73645.21  | 28186.1   | 18430.72  | 26746.42  | 23653.69  | 49913.47  | 24772.25  | 26319.2   | 55607.77  |
| 139173.9  | 102278.4  | 15628.39  | 15236.57  | 32913.1   | 24275.77  | 50261.78  | 21540.19  | 28179.92  | 49915.75  |
| 90311.08  | 79052.37  | 21149.26  | 13732.21  | 33529.08  | 26894.7   | 47368.19  | 23055.04  | 26759.79  | 50843.79  |
| 101166    | 76705.74  | 19599.58  | 18025.31  | 31245.5   | 20326.55  | 46109.64  | 22000.75  | 24419.64  | 51982.92  |
| 92213.9   | 89641.08  | 24300.21  | 24410.68  | 29918.56  | 23952.24  | 43184.16  | 24755.39  | 22405.3   | 47276.02  |

|           |           |           |           |           |           |           |           |           |           |
|-----------|-----------|-----------|-----------|-----------|-----------|-----------|-----------|-----------|-----------|
| LN377.004 | LN377.005 | LN377.004 |
| 12140.67  | 53617.94  | 50912.99  | 43502.82  | 54777.87  | 42356.31  | 33186.17  | 32892.79  | 82421.5   | 44887.78  |
| 10946.82  | 51779.19  | 54861.47  | 48945.44  | 57478.84  | 37583.19  | 35255.94  | 27829.98  | 76759.86  | 48230.21  |
| 11148.73  | 52217.62  | 47982.08  | 45443.2   | 57034.76  | 33223.35  | 35704.53  | 28645.07  | 89962.61  | 41962.95  |
| 14216.7   | 50514.51  | 52750.7   | 43546.3   | 55823.83  | 34633.1   | 32442.27  | 26293.33  | 74108.27  | 42597.69  |
| 13441.39  | 46046.04  | 54160.64  | 39489.59  | 55795.19  | 38808.69  | 30860.77  | 29999.21  | 72142.9   | 44157.54  |

|           |           |           |           |           |           |           |           |           |           |
|-----------|-----------|-----------|-----------|-----------|-----------|-----------|-----------|-----------|-----------|
| LN377.004 | LN377.004 | LN377.005 | LN377.004 | LN377.005 | LN377.004 | LN377.004 | LN377.004 | LN377.004 | LN377.005 |
| 74405.16  | 38710.81  | 39150.91  | 34815.06  | 30827.39  | 39536.24  | 46616.25  | 33554.13  | 34304.95  | 23532.14  |
| 80737.39  | 38688.11  | 40696.81  | 35931.48  | 32585.43  | 42332.17  | 44849.11  | 34670.27  | 56034.44  | 23038.86  |
| 66228.09  | 34308.65  | 37634.59  | 36470.9   | 26477.32  | 40093.49  | 46190.55  | 31722.83  | 54563.41  | 24942.08  |
| 68924.15  | 38337.64  | 36704.27  | 30503.98  | 30703.94  | 39896.52  | 45724.95  | 34959.22  | 55421.44  | 22031.77  |
| 66601.07  | 37265.28  | 33801.63  | 34147.75  | 31588.46  | 35723     | 38850.57  | 32936.87  | 56555     | 23089.65  |

|           |           |           |           |           |           |           |           |           |           |
|-----------|-----------|-----------|-----------|-----------|-----------|-----------|-----------|-----------|-----------|
| LN377.004 | LN377.004 | LN377.005 | LN377.003 | LN377.003 | LN377.004 | LN377.004 | LN377.004 | LN377.004 | LN377.004 |
| 36300.9   | 37207.14  | 49141.43  | 88720.04  | 64820.43  | 41137.86  | 41067.92  | 32688.01  | 44896.92  | 35651.26  |
| 41495.22  | 37590.77  | 47194.83  | 90230.96  | 74489.36  | 39753.88  | 44858.24  | 31930.32  | 41793.61  | 36635.38  |
| 37044.23  | 35260.98  | 48201.34  | 89337.14  | 68203.99  | 37001.18  | 43515.71  | 30637.41  | 36899.04  | 31166.49  |
| 36960.67  | 36701.05  | 43948.51  | 91965.22  | 67540.62  | 40361.54  | 46488.25  | 31384.03  | 39881.13  | 31623.6   |
| 36207.8   | 36302.74  | 44466.08  | 81627.94  | 63332.35  | 42725.14  | 42786.02  | 30127.99  | 38249.38  | 34275.69  |

|           |           |           |           |           |           |           |           |           |           |
|-----------|-----------|-----------|-----------|-----------|-----------|-----------|-----------|-----------|-----------|
| LN377.004 |
| 61103.83  | 30409.73  | 48512.72  | 27500.31  | 64279.51  | 76409.81  | 98042.57  | 75401.84  | 51501.98  | 72155.48  |
| 60243.65  | 30368.02  | 47670.8   | 32403.77  | 70746.12  | 75738.78  | 97576.06  | 72169.4   | 45456.67  | 68577.5   |
| 62270.87  | 30097.11  | 47308.54  | 30366.29  | 64673.35  | 80560.22  | 87346.24  | 68999.24  | 49957.68  | 64683.01  |
| 60682.4   | 28085.33  | 46723.08  | 29051.1   | 65336.56  | 76149.1   | 89994.4   | 76804.78  | 47370.32  | 65289.76  |
| 58893.78  | 27533.41  | 44785.63  | 30191.91  | 60020.33  | 76638.25  | 86582.7   | 68703.89  | 49129.55  | 63640.93  |

|           |           |           |           |           |           |           |           |           |           |
|-----------|-----------|-----------|-----------|-----------|-----------|-----------|-----------|-----------|-----------|
| LN377.005 | LN377.004 | LN377.005 | LN377.004 | LN377.004 | LN377.005 | LN377.004 | LN377.004 | LN377.003 | LN377.003 |
| 16719.31  | 63885.89  | 23512.3   | 41298.28  | 49005.16  | 18535.45  | 30582.58  | 64125.95  | 75536.42  | 100400.7  |
| 19520.19  | 59522.21  | 26427.06  | 44180.61  | 51340.25  | 18572.28  | 31388.5   | 65348.49  | 76161.35  | 90418.09  |
| 18865.55  | 60677.18  | 23549.03  | 42495.83  | 45884.77  | 18586.41  | 26726.1   | 63998.17  | 71926.07  | 92972.16  |
| 17390.29  | 60506.19  | 24084.84  | 43839.28  | 48169.09  | 17963.42  | 27390.27  | 63394.06  | 78712.6   | 93645.03  |
| 15513.96  | 58619.86  | 24660.83  | 42030.74  | 49070.07  | 17588.87  | 26533.77  | 62162.65  | 74059.33  | 89769.33  |



|           |           |           |           |           |           |           |           |           |           |
|-----------|-----------|-----------|-----------|-----------|-----------|-----------|-----------|-----------|-----------|
| LN377.004 | LN377.005 | LN377.004 | LN377.005 | LN377.003 | LN377.004 | LN377.003 | LN377.005 | LN377.004 | LN377.004 |
| 61854.63  | 23037.41  | 43325.07  | 37723.12  | 78901.91  | 84230.19  | 65104.27  | 26772.18  | 97129.34  | 54858.02  |
| 61032.34  | 22991.02  | 45725.49  | 35781.11  | 77555.25  | 80817.85  | 65780.09  | 26079.26  | 99610.88  | 48273.47  |
| 59049.2   | 20943.62  | 44280.8   | 37007.4   | 79406.26  | 82943.37  | 62699.34  | 26934.23  | 101281.8  | 50600.54  |
| 54841.4   | 22581.75  | 41581.61  | 36566.18  | 76904.69  | 85175.04  | 58908.18  | 25361.94  | 101191.9  | 53065.12  |
| 59084.97  | 22961.88  | 40556.48  | 38692.69  | 80056.56  | 81401.68  | 60270.24  | 27125.7   | 97626.27  | 47957.86  |

|           |           |           |           |           |           |           |           |           |           |
|-----------|-----------|-----------|-----------|-----------|-----------|-----------|-----------|-----------|-----------|
| LN377.003 | LN377.004 | LN377.004 | LN377.004 | LN377.003 | LN377.004 | LN377.004 | LN377.003 | LN377.004 | LN377.005 |
| 104557.2  | 66047.59  | 81714.46  | 44701.17  | 59150.06  | 53322.84  | 92382.17  | 73718.55  | 37446.97  | 20078.74  |
| 92387.88  | 66598.67  | 77544.81  | 46856.27  | 60990.63  | 52311.45  | 81923.46  | 75746.54  | 38840.5   | 21969.36  |
| 89627.95  | 64515.14  | 74514.68  | 47937.23  | 60040.73  | 52656.5   | 79672.12  | 73128.35  | 39015.32  | 19938.5   |
| 99845.66  | 61914.38  | 71127.79  | 41962.56  | 59586.6   | 53496.19  | 80861.5   | 71171.43  | 34005.38  | 19224.5   |
| 95759.69  | 65935.72  | 77813.83  | 44969.71  | 57148.11  | 51202.11  | 72392.06  | 71079.92  | 38575.23  | 18860.24  |

|           |           |           |           |           |           |           |           |           |           |
|-----------|-----------|-----------|-----------|-----------|-----------|-----------|-----------|-----------|-----------|
| LN377.004 | LN377.004 | LN377.004 | LN377.004 | LN377.003 | LN377.004 | LN377.005 | LN377.218 | LN377.218 | LN377.218 |
| 77606.14  | 68793.27  | 110720    | 68779.81  | 106432.1  | 84800.47  | 24997.02  | 16572.81  | 18508.7   | 17837.07  |
| 77567.97  | 63273.13  | 106205    | 66568.52  | 108851.2  | 86405.27  | 24680.07  | 26368.46  | 29071.48  | 24803.08  |
| 79115.14  | 67247.01  | 111647    | 68395.63  | 101486.2  | 83482.97  | 25478.49  | 25959.44  | 30203.07  | 26105.24  |
| 76111.87  | 62691.87  | 104538    | 69831.47  | 106803.1  | 83656.21  | 24868.8   | 25426.56  | 29432.4   | 25626.14  |
| 73829.88  | 64225.65  | 107519.8  | 62196.73  | 98127.08  | 80633.03  | 24630.32  | 26908.11  | 29146.7   | 26386.86  |

|           |           |           |           |           |           |           |           |           |           |
|-----------|-----------|-----------|-----------|-----------|-----------|-----------|-----------|-----------|-----------|
| LN377.272 | LN377.272 | LN377.272 | LN377.273 | LN377.272 | LN377.272 | LN377.272 | LN377.273 | LN377.272 | LN377.272 |
| 605875.8  | 1058288   | 490727.4  | 496048.4  | 574520.9  | 170350.9  | 736612.5  | 376538    | 402811.8  | 507547.8  |
| 538531.8  | 1749214   | 372846.8  | 536403.7  | 719312.3  | 152149.8  | 850344.6  | 407750.8  | 365800.1  | 510905.5  |
| 551334.9  | 1262125   | 699344.5  | 544864.3  | 597502.5  | 193182.5  | 803968    | 420207    | 523348.6  | 575868.5  |
| 456263.4  | 1371418   | 522204.6  | 583424.4  | 613885.4  | 190493.9  | 581264.9  | 471094    | 652063.1  | 647950.5  |
| 590921.7  | 2007894   | 562926.6  | 357404.4  | 846605.2  | 118112.7  | 635737.6  | 341541.7  | 594050.6  | 495667.8  |

|           |           |           |           |           |           |           |           |           |           |           |
|-----------|-----------|-----------|-----------|-----------|-----------|-----------|-----------|-----------|-----------|-----------|
| LN377.272 | LN377.272 | LN377.273 | LN377.272 | LN377.272 | LN377.272 | LN377.272 | LN377.272 | LN377.273 | LN377.273 | LN377.273 |
| 535613.6  | 610476.7  | 317953.5  | 682650    | 786877    | 756416.5  | 409758.9  | 604639.1  | 281492.5  | 450527.1  |           |
| 589894.9  | 834553.4  | 469319.3  | 535325.7  | 644135.3  | 1237239   | 632494.7  | 614133.2  | 368334.8  | 500621.4  |           |
| 570025.6  | 725693.4  | 368526.2  | 906395.6  | 645048.5  | 1049825   | 469639    | 480389.6  | 595794.3  | 420523.7  |           |
| 627750.7  | 852425.4  | 418081.8  | 694651.9  | 737714.9  | 769282.2  | 515363.2  | 406800.2  | 509561.8  | 653540.7  |           |
| 576661.1  | 866436.8  | 358140.7  | 695854.7  | 1195794   | 659153    | 478495.1  | 547539.6  | 375251.1  | 347146.4  |           |

|           |           |           |           |           |           |           |           |           |           |
|-----------|-----------|-----------|-----------|-----------|-----------|-----------|-----------|-----------|-----------|
| LN377.273 | LN377.272 | LN377.272 | LN377.273 | LN377.273 | LN377.272 | LN377.272 | LN377.273 | LN377.273 | LN377.273 |
| 299025.4  | 529963.6  | 818299.9  | 966044.6  | 387610.4  | 738859.7  | 618345.1  | 498252.8  | 374046.4  | 363271.2  |
| 438971.8  | 737109.7  | 614319.9  | 1111220   | 431234.7  | 634284.7  | 504808    | 509325.2  | 531472.9  | 658488    |
| 293666.5  | 548196.1  | 697675.9  | 1276306   | 327718.5  | 737817.7  | 392389.2  | 390235    | 543647.2  | 632529.9  |
| 434033.4  | 613158.5  | 551760.5  | 1208710   | 398570.9  | 700412.2  | 557247.3  | 451754.7  | 444186.6  | 376506.9  |
| 376233.2  | 623424.3  | 780932.5  | 1555599   | 416575.4  | 660238    | 420764.2  | 562285.8  | 511851.7  | 444658    |

|           |           |           |           |           |           |           |           |           |           |
|-----------|-----------|-----------|-----------|-----------|-----------|-----------|-----------|-----------|-----------|
| LN377.272 | LN377.272 | LN377.272 | LN377.272 | LN377.272 | LN377.273 | LN377.272 | LN377.273 | LN377.272 | LN377.272 |
| 604345.9  | 783385.7  | 473013.2  | 888669.5  | 375863.4  | 367578.1  | 651098.5  | 313645.2  | 697334.1  | 395923.7  |
| 542123.2  | 732955.8  | 714090.6  | 588076.1  | 384314.9  | 439355.9  | 656909.4  | 280481.9  | 346159.9  | 634110.8  |
| 918235.6  | 804291.8  | 761945.6  | 718266.2  | 418496.4  | 400970.6  | 839444.2  | 348249    | 497938.8  | 453263.3  |
| 836605.6  | 852345    | 891458    | 713334.3  | 391039    | 389436.4  | 700491.3  | 356686.3  | 361034.5  | 523318.4  |
| 613592.6  | 675597.2  | 747203.7  | 617238.3  | 329737.7  | 448828.1  | 626222.5  | 438939.9  | 558940.7  | 452740.8  |

|           |           |           |           |           |           |           |           |           |           |
|-----------|-----------|-----------|-----------|-----------|-----------|-----------|-----------|-----------|-----------|
| LN377.273 | LN377.273 | LN377.272 | LN377.272 | LN377.273 | LN377.272 | LN377.272 | LN377.273 | LN377.273 | LN377.273 |
| 346047.1  | 410672.9  | 565098.6  | 559698.6  | 211956.2  | 652781.8  | 800552.3  | 1114764   | 265363.6  | 332849.4  |
| 543086.4  | 409695.4  | 759026.1  | 383792.8  | 159123.1  | 672240    | 793540    | 909912.1  | 237399.4  | 533767.9  |
| 507461.3  | 391513.4  | 813609.9  | 556148.8  | 230148.1  | 749281.4  | 622992    | 1536481   | 262265.2  | 472589.8  |
| 408399.4  | 410162.1  | 875908.2  | 433186.3  | 237693.6  | 692277.8  | 814464.6  | 918710.1  | 378746.3  | 404208.4  |
| 358847.2  | 447102    | 970554    | 559889.6  | 193120.8  | 860070.7  | 1302006   | 870167.5  | 281658.5  | 321559.5  |



|           |           |           |           |           |           |           |           |           |           |
|-----------|-----------|-----------|-----------|-----------|-----------|-----------|-----------|-----------|-----------|
| LN377.273 | LN377.272 | LN377.272 | LN377.272 | LN377.273 | LN377.272 | LN377.272 | LN377.273 | LN377.272 | LN377.273 |
| 395328.4  | 454280.2  | 522155.3  | 459202.1  | 398358.3  | 820731    | 812693.7  | 278411.9  | 698475.3  | 459083.8  |
| 314612.9  | 336418.7  | 567494.2  | 436484.1  | 423758.8  | 899957.6  | 592683    | 254624    | 613962.4  | 605152.9  |
| 379008    | 464339.9  | 814813    | 444805.8  | 495847.9  | 1280778   | 721237.1  | 228589.7  | 570964.4  | 422562.6  |
| 303616.9  | 347101.4  | 1067569   | 404979.1  | 473048.3  | 1370079   | 735297.1  | 232046.2  | 584794.8  | 354866.9  |
| 426652.9  | 375516.4  | 423875.7  | 376153.2  | 467122.5  | 816473.7  | 539292    | 396558.9  | 732931.9  | 611707.6  |

|           |           |           |           |           |           |           |           |           |           |
|-----------|-----------|-----------|-----------|-----------|-----------|-----------|-----------|-----------|-----------|
| LN377.273 | LN377.273 | LN377.273 | LN377.272 | LN377.272 | LN377.272 | LN377.273 | LN377.272 | LN377.273 | LN377.273 |
| 701960.7  | 492525    | 383507.5  | 520547    | 1293325   | 739966.8  | 593590.8  | 531483.1  | 1399294   | 395533.4  |
| 889678    | 432135.9  | 387613.8  | 694445.4  | 694789.4  | 988457.7  | 509431.1  | 615437.5  | 575517.8  | 457857.2  |
| 670721    | 386629.8  | 488420.9  | 590148.9  | 1066750   | 1057381   | 350725.5  | 918853.6  | 602952.1  | 368671.7  |
| 1360246   | 417063.2  | 340028.2  | 505600.7  | 1125046   | 798910.9  | 467266.1  | 528110.1  | 633510.6  | 366156.2  |
| 1089060   | 339718    | 429318.1  | 625269.2  | 784064.7  | 1171775   | 671992.6  | 512868.4  | 629433.5  | 338634    |

|           |           |           |           |           |           |           |           |           |           |
|-----------|-----------|-----------|-----------|-----------|-----------|-----------|-----------|-----------|-----------|
| LN377.273 | LN377.273 | LN377.273 | LN377.272 | LN377.273 | LN377.273 | LN377.272 | LN377.273 | LN377.273 | LN377.273 |
| 423414.1  | 333257.7  | 416982.6  | 696475.6  | 589860.9  | 417903.2  | 625203.3  | 451333.3  | 512880.1  | 828601.9  |
| 387702.8  | 314398.7  | 333505.6  | 461925.4  | 815066.2  | 418186.8  | 771670.6  | 419106.7  | 635409.6  | 821759.6  |
| 577719.7  | 444923.7  | 441477.5  | 560771.6  | 599012.7  | 416310.9  | 651531.9  | 488006    | 459335.8  | 873680.5  |
| 413173    | 350269.1  | 408069.7  | 612098.1  | 642733.4  | 353492.4  | 623127.5  | 433115.7  | 354336.6  | 836049.4  |
| 595500.7  | 487208.2  | 641752.6  | 443875.2  | 524014.2  | 422537.4  | 639557    | 473851.7  | 296297    | 863607.6  |

|           |           |           |           |           |           |           |           |           |           |
|-----------|-----------|-----------|-----------|-----------|-----------|-----------|-----------|-----------|-----------|
| LN378.275 | LN378.276 |
| 97041.07  | 23427.09  | 134541.2  | 161595.6  | 90798.18  | 125437.4  | 173706.1  | 60698.08  | 69298.07  | 64998.39  |
| 90262.63  | 38391.18  | 135205.6  | 277202.1  | 91694.12  | 129176.6  | 104038.7  | 52546.4   | 80429.84  | 100451.4  |
| 93342.02  | 29385.1   | 95474.31  | 365251.3  | 72423.97  | 204354.7  | 134318.4  | 68193.25  | 107702    | 86914.15  |
| 96845.66  | 30055.8   | 133778.8  | 236598.3  | 81929.99  | 122923.1  | 180531.3  | 75603.65  | 69099.77  | 68838.39  |
| 107799.4  | 40704.78  | 125825.9  | 228634.4  | 111008.7  | 102548    | 152588.5  | 93849.91  | 103757.2  | 75132.33  |

|           |           |           |           |           |           |           |           |           |           |
|-----------|-----------|-----------|-----------|-----------|-----------|-----------|-----------|-----------|-----------|
| LN378.276 | LN378.276 | LN378.276 | LN378.276 | LN378.275 | LN378.276 | LN378.276 | LN378.276 | LN378.276 | LN378.276 |
| 76950.75  | 111939.5  | 115865.5  | 100886.6  | 187451.7  | 124519.4  | 105038.2  | 100725.5  | 190320.4  | 216029    |
| 97953.36  | 92397.7   | 88800.51  | 87195.47  | 335263.4  | 102049.6  | 156703.5  | 156232.1  | 191223.6  | 156547.6  |
| 99640.57  | 109976.8  | 104320.9  | 87504.44  | 241253.5  | 103716    | 155137.1  | 143044.5  | 187633.8  | 138581.4  |
| 117382    | 82869.72  | 76034.41  | 76428.01  | 163070.7  | 111526.8  | 127661.2  | 128528.8  | 245036.3  | 144581.9  |
| 118590.8  | 82031.06  | 69449.06  | 83442.68  | 207086.1  | 117517.1  | 119635.7  | 127669.9  | 319292.8  | 165780.7  |

|           |           |           |           |           |           |           |           |           |           |
|-----------|-----------|-----------|-----------|-----------|-----------|-----------|-----------|-----------|-----------|
| LN378.276 |
| 132086.9  | 122107    | 116240.1  | 179135.6  | 95745.12  | 214902.7  | 163610.6  | 117960.8  | 143542.3  | 91304.77  |
| 142031.3  | 112642.6  | 128805.1  | 140451.6  | 94158.15  | 160769.4  | 93375.2   | 144655.1  | 107766.1  | 65732.68  |
| 114833.7  | 164670.9  | 141552.7  | 129024.1  | 76704.2   | 122076.6  | 111883.7  | 130114.3  | 93383.87  | 121509    |
| 107370.6  | 162319.1  | 105689.9  | 172482.4  | 98428.41  | 154229.3  | 123796.8  | 100924.5  | 101156.9  | 78717.28  |
| 133961.4  | 225338.9  | 143020.5  | 114079    | 101540.6  | 155046.6  | 128774.6  | 111488.5  | 119108.5  | 73304.95  |

|           |           |           |           |           |           |           |           |           |           |
|-----------|-----------|-----------|-----------|-----------|-----------|-----------|-----------|-----------|-----------|
| LN378.276 |
| 120667.1  | 130286.1  | 68646.78  | 112430.5  | 129555.3  | 211446.8  | 84534.27  | 79969.21  | 126028.2  | 55397.15  |
| 137849.7  | 101343.2  | 87605.94  | 65752.42  | 138422.5  | 187432.9  | 97193.54  | 116826    | 71530.56  | 77793.77  |
| 87171.9   | 100951.5  | 74380.38  | 107765.8  | 116457.7  | 180874.1  | 80531.77  | 101544    | 82769.81  | 63687.39  |
| 91780.12  | 89315.37  | 62371.41  | 69446.78  | 116407.9  | 187135.9  | 112777.9  | 83527.75  | 80088.94  | 90721.47  |
| 81672.58  | 113473.3  | 108388.4  | 92059.59  | 110578.7  | 172806.4  | 74741.46  | 117890.5  | 63863.44  | 75149.06  |

|           |           |           |           |           |           |           |           |           |           |
|-----------|-----------|-----------|-----------|-----------|-----------|-----------|-----------|-----------|-----------|
| LN378.276 | LN378.276 | LN378.276 | LN378.275 | LN378.276 | LN378.276 | LN378.276 | LN378.276 | LN378.276 | LN378.276 |
| 85962.18  | 175058.4  | 124187    | 202204.5  | 129015.4  | 60101.84  | 98483.85  | 91564.86  | 75104.04  | 83217.32  |
| 76950.65  | 121765.4  | 107584.5  | 188129.9  | 180070.4  | 112424.7  | 120098.7  | 99462.06  | 94147.12  | 90201.52  |
| 98284.15  | 124184.8  | 82957.49  | 211560.1  | 100454.3  | 72633.1   | 138917.9  | 103768.7  | 101243.8  | 95439.56  |
| 80755.12  | 148654.1  | 80739.9   | 225062.7  | 159320.8  | 73086.34  | 94029.76  | 88822.91  | 73657.38  | 108866.7  |
| 91076.65  | 165745.9  | 82863.33  | 215068.6  | 113671.4  | 76772.8   | 110851.6  | 95858.41  | 81935.97  | 112465.1  |



|           |           |           |           |           |           |           |           |           |           |
|-----------|-----------|-----------|-----------|-----------|-----------|-----------|-----------|-----------|-----------|
| LN378.276 | LN378.275 | LN378.276 |
| 133352.4  | 162333.4  | 113624.2  | 115315.9  | 217901.1  | 190513.8  | 97322     | 113810.8  | 99558.35  | 50485.54  |
| 80808.15  | 152134.8  | 70749.63  | 140231.3  | 143962.9  | 212405.2  | 91055.08  | 131289.1  | 86144.81  | 42651.84  |
| 127126.3  | 144229.9  | 97391.47  | 114036.4  | 159653.8  | 237153.8  | 149814.5  | 122171.8  | 83585.07  | 43060.51  |
| 104904.4  | 219601    | 95305.72  | 116716.5  | 213007.8  | 227338.5  | 92098.19  | 120866.7  | 86051.15  | 44820.5   |
| 78579.73  | 144655.5  | 84621.4   | 111994.7  | 190458.4  | 213064.6  | 90672.05  | 134861.5  | 82312.65  | 60856.57  |

|           |           |           |           |           |           |           |           |           |           |
|-----------|-----------|-----------|-----------|-----------|-----------|-----------|-----------|-----------|-----------|
| LN378.276 |
| 131685.9  | 97772.62  | 99886.26  | 137895.5  | 162443.8  | 97339.38  | 94642.7   | 165780.7  | 220544    | 211984.4  |
| 125827.6  | 125676.7  | 118914.4  | 97859.18  | 186807.6  | 73482.08  | 83762.83  | 245110.8  | 179919.6  | 131653.5  |
| 156034.8  | 96002.02  | 103989.6  | 118099.5  | 170316.9  | 87363.5   | 108614.6  | 163641.5  | 200490.8  | 145631.3  |
| 139522.6  | 92814.04  | 163103.7  | 124988.5  | 201351    | 98102.69  | 125240.9  | 196274.3  | 286189    | 152091.5  |
| 136608.4  | 93585.27  | 112857.6  | 115623.5  | 184894.6  | 87177.58  | 94131.88  | 183249.5  | 155390.9  | 201035    |

|           |           |           |           |           |           |           |           |           |           |
|-----------|-----------|-----------|-----------|-----------|-----------|-----------|-----------|-----------|-----------|
| LN378.276 |
| 79532.24  | 103068.8  | 169254    | 57336.65  | 84227.73  | 184007.2  | 127999.9  | 96277.76  | 122406.5  | 65727.04  |
| 65738.3   | 97974.03  | 104920.5  | 70759.35  | 87038.61  | 223467.2  | 119190.7  | 83096.57  | 114154.1  | 68271.33  |
| 64861.14  | 92493.54  | 139267.4  | 55876.57  | 72774.39  | 269406    | 129904.2  | 68471.39  | 92741.43  | 76520.66  |
| 89090.64  | 69000.67  | 95905.76  | 68720.04  | 96375.04  | 196289.2  | 115227.8  | 98455.39  | 121420.2  | 67864.34  |
| 76986.16  | 127235.9  | 101121.2  | 68039.69  | 87115.29  | 175178.3  | 129781.9  | 101017.9  | 120313.7  | 57247.4   |

|           |           |           |           |           |           |           |           |           |           |
|-----------|-----------|-----------|-----------|-----------|-----------|-----------|-----------|-----------|-----------|
| LN378.276 | LN378.276 | LN378.276 | LN378.276 | LN378.276 | LN378.846 | LN378.918 | LN378.918 | LN378.918 | LN378.918 |
| 78513.88  | 99547.14  | 44880.8   | 93768.16  | 63483.92  | 56541.14  | 151852.5  | 236779.2  | 98958.17  | 294393.3  |
| 78682.83  | 115600.8  | 50105.75  | 102535.1  | 86428.53  | 52786.3   | 125013.8  | 229678.1  | 162107.2  | 219045.2  |
| 76749.11  | 81161.77  | 54327.37  | 105424.6  | 59905.89  | 80139.48  | 140681.9  | 281456.4  | 115686.8  | 194843.6  |
| 82064.73  | 99873.06  | 51377.68  | 125326    | 56384.4   | 77905.57  | 132212.9  | 228493.2  | 110547.4  | 233110.2  |
| 86641.59  | 106152.6  | 51962.31  | 85985.02  | 70326.92  | 73440.32  | 134822.3  | 237941.6  | 98657.15  | 206783.9  |

|           |           |           |           |           |           |           |           |           |           |
|-----------|-----------|-----------|-----------|-----------|-----------|-----------|-----------|-----------|-----------|
| LN378.918 |
| 161544.3  | 139776.9  | 153609.5  | 281086.7  | 257991.3  | 322576.7  | 275544.8  | 251320    | 228682.7  | 247113    |
| 141760.3  | 113480.5  | 143902.7  | 295813    | 148391    | 241499.1  | 184152.5  | 295701.6  | 244036.2  | 192074    |
| 221166.9  | 155415.4  | 129690    | 200473.1  | 200547.6  | 249568.3  | 186393.2  | 230949    | 237915.6  | 204963.8  |
| 183968.1  | 144615    | 149844.3  | 266662.9  | 211524    | 227953.9  | 202400.4  | 235631.1  | 206074    | 180029.2  |
| 171387.8  | 120934.5  | 210335.9  | 351179.5  | 223294    | 215812.9  | 248716.4  | 273685.3  | 272923.7  | 246067.8  |

|           |           |           |           |           |           |           |           |           |           |
|-----------|-----------|-----------|-----------|-----------|-----------|-----------|-----------|-----------|-----------|
| LN378.918 |
| 294813.2  | 229453.5  | 162354.5  | 217668.4  | 219559.4  | 206418.5  | 158098.3  | 243751.3  | 236540.3  | 316995.7  |
| 168210.1  | 191767.4  | 242623.8  | 251917.9  | 263287.4  | 236221.9  | 248261    | 204774.5  | 226830.5  | 247966.6  |
| 198896.1  | 255746.4  | 218377.8  | 161813.9  | 221998.4  | 208415.3  | 219405.4  | 227440.4  | 279913.9  | 224204.9  |
| 283396.6  | 207956.7  | 190062    | 365702.4  | 284305.9  | 242189.3  | 194231.8  | 255012.8  | 275661.3  | 196735    |
| 234643.5  | 199642.5  | 254122.2  | 156454.3  | 149929.6  | 229010.5  | 207633.7  | 164325.1  | 280428.2  | 232069.7  |

|           |           |           |           |           |           |           |           |           |           |
|-----------|-----------|-----------|-----------|-----------|-----------|-----------|-----------|-----------|-----------|
| LN378.918 |
| 216660.8  | 197472.2  | 218591.9  | 231466.6  | 218410.8  | 273719.5  | 304105.7  | 222193.5  | 164590.1  | 302875.8  |
| 217137    | 243675.2  | 179016    | 342167.4  | 242138.6  | 293898.9  | 262832    | 224451.4  | 154827.8  | 260684.6  |
| 194896    | 221453.6  | 191537.5  | 244660.6  | 273267.3  | 228077.7  | 291326    | 175513.7  | 131057.4  | 247207.2  |
| 192851.8  | 258926.9  | 184169.5  | 232162.1  | 315228.7  | 273319.9  | 214605.2  | 202541.8  | 129293.6  | 183454.6  |
| 258207.1  | 201972.2  | 186087.5  | 313179.6  | 189611.4  | 185956.4  | 148656.4  | 280663.1  | 237286.5  | 174384.7  |

|           |           |           |           |           |           |           |           |           |           |
|-----------|-----------|-----------|-----------|-----------|-----------|-----------|-----------|-----------|-----------|
| LN378.918 |
| 185989.4  | 97485.13  | 130466.7  | 97860.84  | 307772.7  | 69288.39  | 82926.75  | 122095.5  | 221035.1  | 89704.86  |
| 231053.6  | 124669.3  | 127652.7  | 119066.9  | 219895.5  | 71419.74  | 46062.52  | 152583.7  | 270080.6  | 146245.9  |
| 183769.6  | 84840.56  | 130220.6  | 78382.73  | 297546.5  | 70645.89  | 49033.72  | 106900.7  | 207203.8  | 121273    |
| 196564.3  | 101370.5  | 152192.5  | 83274.73  | 230140.4  | 73912.23  | 58899.46  | 122424.6  | 298016.3  | 120983.4  |
| 189256.9  | 105585.8  | 124890.8  | 71064.56  | 332894.8  | 51311.7   | 46108.81  | 159327.3  | 188431.5  | 85814.31  |



|           |           |           |           |           |           |           |           |           |           |
|-----------|-----------|-----------|-----------|-----------|-----------|-----------|-----------|-----------|-----------|
| LN378.918 |
| 194953.8  | 286780.5  | 160158.5  | 182071.6  | 256050.3  | 162101.1  | 207363.4  | 289736.7  | 201135.8  | 112454.8  |
| 230228.6  | 231339.9  | 97089.72  | 176795.5  | 177582.2  | 176648.4  | 221704    | 188056.4  | 234196.4  | 97224.27  |
| 257180.7  | 172420.1  | 82541.09  | 168474.5  | 258892.2  | 236269.6  | 187445.3  | 168957.2  | 196707    | 107828.8  |
| 218795    | 201888.3  | 116080.4  | 174315.1  | 237126.7  | 214216.2  | 290388.8  | 170394    | 323234.5  | 127083    |
| 218917.9  | 196112.9  | 104152.1  | 179049.1  | 259488.4  | 260919.4  | 184300    | 208187.5  | 243250.9  | 109647.4  |

|           |           |           |           |           |           |           |           |           |           |
|-----------|-----------|-----------|-----------|-----------|-----------|-----------|-----------|-----------|-----------|
| LN378.918 |
| 152330.6  | 174327.3  | 193039.1  | 73946.73  | 254874.7  | 212345.1  | 107223.1  | 230484.7  | 239560.9  | 87680.25  |
| 112787.4  | 178309.8  | 244001.4  | 100087.7  | 222645.4  | 233007.7  | 102329.6  | 197405.3  | 210214.5  | 69785.1   |
| 101632.8  | 215190.1  | 218214.9  | 67905.11  | 244492.4  | 281214.6  | 126222.5  | 210182    | 269229.5  | 68487.92  |
| 99321.89  | 162122.7  | 231967    | 81220.68  | 252022.1  | 207040.8  | 119544.8  | 232152.9  | 208043.9  | 88630.66  |
| 166716.2  | 158594.4  | 185711.8  | 74306.88  | 296513.6  | 201628.2  | 86690.68  | 183003.1  | 197011    | 55352.53  |

|           |           |           |           |           |           |           |           |           |           |
|-----------|-----------|-----------|-----------|-----------|-----------|-----------|-----------|-----------|-----------|
| LN378.918 |
| 151032.4  | 79388.51  | 57665.89  | 183907    | 53452.51  | 118545.1  | 91588.83  | 85476.68  | 188631.3  | 46364.02  |
| 235573.9  | 50599.16  | 46838.67  | 299265.7  | 51503     | 124259.3  | 79857.42  | 57291.05  | 584873    | 60542.73  |
| 272114.8  | 44955.01  | 48349.73  | 203026    | 104049.9  | 87466.31  | 124938.7  | 49194.1   | 184382.5  | 58191.75  |
| 191222.7  | 76482.71  | 47687.09  | 188554.1  | 71866.13  | 95904.22  | 97053.04  | 62376.09  | 243107.5  | 30916.68  |
| 181028.6  | 31909.71  | 53573.63  | 188798.8  | 53095.33  | 111940.7  | 85635.9   | 65395.15  | 220449.4  | 20733.46  |

|           |           |           |           |           |           |           |           |           |           |
|-----------|-----------|-----------|-----------|-----------|-----------|-----------|-----------|-----------|-----------|
| LN378.918 | LN378.918 | LN378.918 | LN379.001 | LN379.000 | LN379.000 | LN379.000 | LN379.000 | LN379.001 | LN379.000 |
| 230313.4  | 322629.5  | 234261.4  | 15195.65  | 31679.73  | 44026.07  | 28056.47  | 38619.91  | 18777.62  | 44904.62  |
| 297760.5  | 208396.3  | 255222.8  | 13908.86  | 27931.58  | 44300.09  | 30086.68  | 37658.75  | 18047.28  | 48991.26  |
| 278926.8  | 272047.6  | 244036.3  | 13501.49  | 31468.41  | 39302.21  | 30089.38  | 44174.49  | 20663.7   | 39508.03  |
| 230851    | 217721.3  | 283269.8  | 12990.07  | 30127.28  | 45372.03  | 27970.03  | 40849.6   | 18472.1   | 45453.07  |
| 242885.2  | 284612.3  | 245494.7  | 15265.62  | 29869.81  | 38286.27  | 37661.55  | 30261.3   | 20730.11  | 29559.41  |

|           |           |           |           |           |           |           |           |           |           |
|-----------|-----------|-----------|-----------|-----------|-----------|-----------|-----------|-----------|-----------|
| LN379.000 | LN379.000 | LN379.000 | LN379.000 | LN379.000 | LN379.000 | LN379.001 | LN379.000 | LN379.000 | LN379.000 |
| 29254.58  | 36661.34  | 29330.87  | 39289.82  | 53282.53  | 48309.96  | 27326.65  | 51753.58  | 22497.13  | 42853.72  |
| 26572.09  | 35234.55  | 31022.18  | 36563.71  | 45731.34  | 54832.05  | 26914.96  | 55832.13  | 23799.53  | 41413.8   |
| 38670.08  | 26241.83  | 38881.96  | 36954.8   | 40386.79  | 44586.01  | 23663.56  | 48569.35  | 29090.03  | 48165.85  |
| 27996.01  | 31721.6   | 34706.15  | 43116.03  | 48216.13  | 54144.48  | 25568.48  | 55636.16  | 25245.16  | 40520.76  |
| 36408.96  | 38765.06  | 34057.71  | 51379.04  | 40134.98  | 54791.96  | 28365.65  | 50204.15  | 29367.92  | 35640.99  |

|           |           |           |           |           |           |           |           |           |           |
|-----------|-----------|-----------|-----------|-----------|-----------|-----------|-----------|-----------|-----------|
| LN379.000 | LN379.000 | LN379.000 | LN379.001 | LN379.000 | LN379.000 | LN379.000 | LN379.000 | LN379.000 | LN379.000 |
| 38416.61  | 40411.04  | 34456.13  | 23442     | 30902.68  | 22269.33  | 48126.7   | 31226.54  | 46726.66  | 29140.15  |
| 35772.64  | 41140.35  | 31740.73  | 25944.62  | 26810.1   | 23621.68  | 50303.22  | 32780.6   | 42382.23  | 28700.58  |
| 37533.82  | 40100.87  | 39402.84  | 21054.92  | 28176.98  | 24821.94  | 59057.94  | 38382.29  | 53938.93  | 35336.66  |
| 37604.72  | 41491.37  | 35781.72  | 23176.47  | 27776.8   | 26843.96  | 49771.45  | 29403.58  | 41488.69  | 32084.93  |
| 47789.95  | 39316.1   | 32876.31  | 21472.71  | 25404.63  | 28706.26  | 43121.96  | 25430.14  | 51686.25  | 23557.03  |

|           |           |           |           |           |           |           |           |           |           |
|-----------|-----------|-----------|-----------|-----------|-----------|-----------|-----------|-----------|-----------|
| LN379.000 |
| 45616.35  | 52346.61  | 29812.81  | 35618.1   | 38879.01  | 26693.94  | 28125.5   | 29328.67  | 35357.02  | 53955.45  |
| 49756.4   | 52227.25  | 27155.79  | 34271.68  | 38024.13  | 30732.65  | 23384.47  | 25625.11  | 34704.32  | 55050.5   |
| 47528.24  | 58300.53  | 25489.86  | 40641.86  | 33128     | 28522.99  | 38350.14  | 32080.28  | 44662.14  | 50883.9   |
| 49568.42  | 53521.04  | 28093.39  | 33064.26  | 42984     | 26671.86  | 23414.1   | 30004.56  | 37514.85  | 51926.49  |
| 34721.85  | 56617.02  | 28895.04  | 34151.08  | 41714.16  | 29182.09  | 28541.19  | 40187.23  | 31915.97  | 80788.15  |

|           |           |           |           |           |           |           |           |           |           |
|-----------|-----------|-----------|-----------|-----------|-----------|-----------|-----------|-----------|-----------|
| LN379.000 | LN379.001 |
| 42776.15  | 44063.91  | 53923.36  | 25836.61  | 59267.9   | 22098.75  | 25795.7   | 38496.24  | 37307.02  | 24263.31  |
| 46802.34  | 48562.97  | 55363.38  | 27263.28  | 60403.33  | 27999.99  | 25926.13  | 41516.12  | 38542.02  | 19345.36  |
| 38409.24  | 55752.97  | 41684.15  | 26150.84  | 68126.35  | 23651.6   | 23467.99  | 46400.04  | 35550.86  | 17981.83  |
| 45132.09  | 46551.4   | 54265.31  | 27028.35  | 58991.22  | 24391.8   | 20594.05  | 40650.05  | 36083.56  | 19403.33  |
| 46101.32  | 46366.28  | 47428.39  | 26959.63  | 51920.78  | 23052.42  | 31740.55  | 44843.2   | 51937.13  | 14466.86  |



|           |           |           |           |           |           |           |           |           |           |
|-----------|-----------|-----------|-----------|-----------|-----------|-----------|-----------|-----------|-----------|
| LN379.000 | LN379.001 | LN379.000 | LN379.000 | LN379.000 | LN379.000 | LN379.001 | LN379.000 | LN379.000 | LN379.000 |
| 32090.95  | 23478.9   | 30524.31  | 65586.46  | 36164.5   | 42208.36  | 35630.81  | 23976.05  | 22542.63  | 41690.41  |
| 26980.21  | 21780.52  | 35102.08  | 62412.02  | 34927.05  | 49644.94  | 41244.78  | 22622.87  | 22300.8   | 37244.26  |
| 26046.4   | 23211.72  | 35333.76  | 58749.16  | 51334.71  | 64234.19  | 36485.71  | 34067.88  | 20964.38  | 35208.35  |
| 28700.77  | 21077.38  | 30830.08  | 59975.58  | 37896.77  | 43557.46  | 34586.29  | 22851.32  | 20801.12  | 40364.29  |
| 35669.55  | 21259.64  | 32207.26  | 80294.3   | 44997.46  | 36536.92  | 32921     | 20572.92  | 26555.45  | 47919.84  |

|           |           |           |           |           |           |           |           |           |           |
|-----------|-----------|-----------|-----------|-----------|-----------|-----------|-----------|-----------|-----------|
| LN379.000 | LN379.000 | LN379.000 | LN379.001 | LN379.001 | LN379.000 | LN379.000 | LN379.001 | LN379.000 | LN379.001 |
| 39536.6   | 45625.93  | 46068.62  | 14161.62  | 21447.28  | 22864.97  | 37496.34  | 27416.93  | 49659.42  | 17128.26  |
| 38358.36  | 50211.8   | 41534.82  | 11026.68  | 19096.19  | 21370.74  | 35035.86  | 28806.91  | 50569.04  | 17864.04  |
| 50684.59  | 46943.89  | 44608.77  | 15749.21  | 20392.36  | 26514.68  | 35518.9   | 29476.56  | 58862.79  | 18545.67  |
| 39223.07  | 50092.59  | 40726.73  | 13541.22  | 21247.78  | 20307.43  | 41899.54  | 27950.19  | 46996.08  | 15537.8   |
| 36347.1   | 51006.07  | 52419.82  | 13932.41  | 18724.13  | 26029.35  | 34440.71  | 21394.58  | 43567.84  | 14624.76  |

|           |           |           |           |           |           |           |           |           |           |
|-----------|-----------|-----------|-----------|-----------|-----------|-----------|-----------|-----------|-----------|
| LN379.000 | LN379.000 | LN379.001 | LN379.000 |
| 54357.19  | 24466.36  | 18515.07  | 29389.28  | 44235.56  | 32638.28  | 27933.4   | 23362.84  | 35036.59  | 37309.97  |
| 61201.94  | 19260.88  | 18623.42  | 30923.74  | 49097.75  | 28628.25  | 28710.68  | 24951.18  | 30616.45  | 40090.66  |
| 86541.06  | 22478.83  | 22337.76  | 36806.26  | 60033.38  | 18086.39  | 33909.22  | 31859.82  | 40817.57  | 49966.98  |
| 54553.74  | 23512.22  | 18036.89  | 25625.63  | 43839.65  | 31753.95  | 29182.84  | 24441.6   | 35425.34  | 37110.9   |
| 58906.08  | 20934     | 21403.19  | 26727.76  | 36082.8   | 22758.46  | 27699.79  | 27783.54  | 31226.89  | 38454.55  |

|           |           |           |           |           |           |           |           |           |           |
|-----------|-----------|-----------|-----------|-----------|-----------|-----------|-----------|-----------|-----------|
| LN379.000 | LN379.001 | LN379.000 | LN379.001 | LN379.000 | LN379.000 | LN379.000 | LN379.020 | LN379.020 | LN379.020 |
| 58679.03  | 17764.21  | 48183.33  | 16174.82  | 48637.42  | 37259.27  | 31249.07  | 44812.02  | 51029.49  | 52109.41  |
| 51758.25  | 16091.88  | 50238.47  | 17193.14  | 41433.49  | 35991.2   | 31861.89  | 39133.91  | 50460.91  | 51542.12  |
| 56780.69  | 18805.3   | 54433.07  | 18763.05  | 39752.34  | 34877.13  | 29314.9   | 40293.29  | 47211.63  | 51196.45  |
| 51995.27  | 16828.07  | 53280.37  | 16168.31  | 45091.38  | 37262.43  | 35915.95  | 41792.35  | 44263.91  | 48788.61  |
| 61145.64  | 13996.44  | 61892.65  | 15114.24  | 57594.34  | 41389.65  | 31638.01  | 37301.31  | 47126.56  | 53129.82  |

|           |           |           |           |           |           |           |           |           |           |
|-----------|-----------|-----------|-----------|-----------|-----------|-----------|-----------|-----------|-----------|
| LN379.197 |
| 57402.2   | 52982.74  | 35801.54  | 32363.71  | 61192.76  | 52440.37  | 42046.55  | 92356.87  | 35260.99  | 44277.17  |
| 57928.31  | 54580.79  | 32004.95  | 42780.19  | 64915.61  | 50196.05  | 45181.81  | 92529.76  | 32385.68  | 44571.2   |
| 56194.76  | 54752.54  | 31494.23  | 31930.41  | 60890.38  | 48250.2   | 47812.95  | 95350.31  | 32336.28  | 39531.37  |
| 62009.45  | 52499.22  | 30667.25  | 37292.52  | 61921.83  | 50902.87  | 42811.59  | 87567.31  | 37738.05  | 40913.81  |
| 60376.74  | 55532.33  | 33987.48  | 35616.52  | 65679.72  | 48241.99  | 48149.31  | 96142.65  | 38297     | 38832.99  |

|           |           |           |           |           |           |           |           |           |           |
|-----------|-----------|-----------|-----------|-----------|-----------|-----------|-----------|-----------|-----------|
| LN379.196 | LN379.197 | LN379.197 | LN379.197 | LN379.197 | LN379.198 | LN379.198 | LN379.198 | LN379.198 | LN379.198 |
| 39859.94  | 34264.29  | 44787.25  | 44637.51  | 50197.07  | 24427.47  | 35564.51  | 31771.41  | 21520.38  | 25688.78  |
| 35938.67  | 33586.08  | 46724.68  | 43759.18  | 49073.54  | 19221.34  | 35525.46  | 34601.02  | 27327.7   | 25189.45  |
| 33100.12  | 31768.33  | 49391.45  | 47376.3   | 48808.78  | 25021.06  | 39596.93  | 31206.5   | 24102.57  | 27067.74  |
| 33522.03  | 32894.68  | 44946.07  | 43645.59  | 52346.36  | 23198.74  | 38785.32  | 30544.64  | 21772.29  | 24935.24  |
| 31130.48  | 33310.77  | 47047.24  | 42797.12  | 50047.61  | 24749.09  | 41128.33  | 30634.32  | 25294.4   | 28744.8   |

|           |           |           |           |           |           |           |           |           |           |
|-----------|-----------|-----------|-----------|-----------|-----------|-----------|-----------|-----------|-----------|
| LN379.198 | LN379.198 | LN379.198 | LN379.197 | LN379.198 | LN379.198 | LN379.198 | LN379.198 | LN379.198 | LN379.198 |
| 33035.88  | 29795.1   | 56785.84  | 17848.45  | 28019.84  | 17735.02  | 30612.59  | 17785.77  | 26474.46  | 27854.07  |
| 33861.55  | 33280.16  | 47439.9   | 14623.9   | 29804.9   | 16305     | 28914.04  | 18610.55  | 28723.3   | 25519.26  |
| 32260.87  | 29064.72  | 54748.23  | 18936.49  | 30356.32  | 16395.52  | 28818.66  | 17698.99  | 26595.36  | 25536.22  |
| 35311.03  | 31852.73  | 56131.69  | 21539.38  | 28520.81  | 13919.06  | 26784.67  | 17502.23  | 28745.74  | 25430.27  |
| 33320.92  | 36071.82  | 49588.26  | 17709.6   | 30552.84  | 17214.52  | 28866.16  | 16337.44  | 27773.7   | 29697.62  |

|           |           |           |           |           |           |           |           |           |           |
|-----------|-----------|-----------|-----------|-----------|-----------|-----------|-----------|-----------|-----------|
| LN379.198 |
| 11122.16  | 42529.15  | 45975.75  | 15834.64  | 25958.46  | 26797.58  | 31220.76  | 25629.55  | 25999.8   | 20490.85  |
| 11075.54  | 43410.42  | 45452.62  | 18097.2   | 23621.92  | 28914.23  | 35446.64  | 25713.22  | 27716.72  | 19186.21  |
| 12580.19  | 40540.65  | 46535.12  | 16118.26  | 25796.83  | 30552.42  | 34989.12  | 28546.91  | 25616.33  | 19136.27  |
| 12942.5   | 39796.84  | 46583.25  | 14208.53  | 24001.7   | 30121.82  | 34174.7   | 29409.97  | 24174.42  | 18829.47  |
| 11409.09  | 39397.4   | 51865.37  | 16442.02  | 24855.45  | 28930.94  | 33529.29  | 26829.43  | 22941.19  | 20975.25  |



|           |           |           |           |           |           |           |           |           |           |
|-----------|-----------|-----------|-----------|-----------|-----------|-----------|-----------|-----------|-----------|
| LN379.198 |
| 29648.8   | 35134.81  | 25052.3   | 26200.05  | 45976.52  | 27300.38  | 34488.2   | 16127.8   | 42436.65  | 28694.46  |
| 31899.52  | 33674.22  | 26421.17  | 27044.85  | 42572.29  | 26566.33  | 32905.14  | 14141.8   | 44897.58  | 28120.76  |
| 30016.9   | 32424.72  | 23659.1   | 24639.08  | 46535.19  | 25429.74  | 36544.96  | 13619.18  | 48103.64  | 28882.99  |
| 32208.2   | 32627.07  | 24884.84  | 24152.3   | 47482.92  | 28091.4   | 34154.78  | 14917.1   | 43323.75  | 30921.64  |
| 33257.43  | 34311.52  | 21117.28  | 26252.65  | 40744.33  | 25905.67  | 32533.56  | 14524.83  | 45698.25  | 29565.76  |

|           |           |           |           |           |           |           |           |           |           |
|-----------|-----------|-----------|-----------|-----------|-----------|-----------|-----------|-----------|-----------|
| LN379.198 |
| 20635.01  | 21816.63  | 34446.88  | 14844.79  | 34446.62  | 76841.14  | 16985.06  | 36713.56  | 46584.38  | 35401.77  |
| 22014.6   | 20127.55  | 40099.77  | 16123.32  | 31554.26  | 73001.11  | 17159.33  | 37267.54  | 48456.12  | 34658.77  |
| 20454.35  | 21241.49  | 40080.97  | 14585.22  | 33602.04  | 74450.32  | 19031.4   | 36772.85  | 52205.97  | 32369.33  |
| 23968.14  | 19914.03  | 41610.76  | 13767.2   | 32706.65  | 76876.8   | 19798.36  | 39685.95  | 45125.9   | 39339.85  |
| 23741.25  | 19993.78  | 35855.58  | 14724.09  | 32508.36  | 70071.05  | 19537.59  | 36334.49  | 45385.82  | 38705.39  |

|           |           |           |           |           |           |           |           |           |           |
|-----------|-----------|-----------|-----------|-----------|-----------|-----------|-----------|-----------|-----------|
| LN379.198 |
| 49025.2   | 29956.25  | 24545.6   | 29603.5   | 24473.43  | 16975.63  | 46861.59  | 39293.22  | 23838.34  | 40732.11  |
| 48911.95  | 29257     | 24426.02  | 25733.05  | 26832.19  | 15067.83  | 47926.18  | 41302.11  | 22821.95  | 39942.23  |
| 50550.94  | 29059.1   | 24609.76  | 27855.32  | 25846.5   | 18285.63  | 46165.49  | 39850.38  | 23919.89  | 46808.78  |
| 46748.15  | 29999.85  | 27125.17  | 25136.99  | 25932.78  | 16281.18  | 48757.21  | 38211.68  | 27657.58  | 48376.36  |
| 51393.83  | 27493.67  | 25163.3   | 26757.25  | 27279.01  | 17924.28  | 47488.74  | 38399.92  | 22713.76  | 43832.55  |

|           |           |           |           |           |           |           |           |           |           |
|-----------|-----------|-----------|-----------|-----------|-----------|-----------|-----------|-----------|-----------|
| LN379.198 | LN379.198 | LN379.198 | LN379.198 | LN379.198 | LN379.198 | LN379.197 | LN379.198 | LN379.198 | LN379.198 |
| 37269.69  | 18267.8   | 36657.05  | 19952.62  | 45158.3   | 14179.27  | 76705.43  | 23130.48  | 40240.95  | 14973.9   |
| 37507.79  | 20759.17  | 34916.99  | 21199.6   | 44652.47  | 13278.1   | 74283.94  | 26504.43  | 40147.65  | 14537.54  |
| 37275.58  | 17373.2   | 36173.16  | 20965.42  | 44464     | 14879.17  | 76488.47  | 25488.31  | 39251.08  | 15022     |
| 37121.97  | 17240.32  | 39119.41  | 25912.49  | 45354.17  | 14544.73  | 77990.14  | 23703.09  | 38195.7   | 14240.87  |
| 37954.3   | 19468.23  | 37169.39  | 23712.1   | 47252.46  | 14254.61  | 79586.72  | 24222.92  | 39288.63  | 13775.8   |

|           |           |           |           |           |           |           |           |           |           |
|-----------|-----------|-----------|-----------|-----------|-----------|-----------|-----------|-----------|-----------|
| LN379.198 |
| 15568.67  | 36646.17  | 23714.19  | 59690.28  | 64880.56  | 35906.77  | 28402.27  | 46375.1   | 37670.68  | 46623.64  |
| 16697.24  | 41579.56  | 23869.71  | 57372.42  | 65447.65  | 39031.48  | 28768.36  | 50538.64  | 36383.95  | 46415.76  |
| 16667.86  | 37663.95  | 25664.87  | 63547.7   | 71473.85  | 41271.93  | 30583.19  | 61254.31  | 41758.79  | 51629.1   |
| 14877.33  | 40041.93  | 27340.07  | 56885.39  | 71295.81  | 37818.42  | 29747.56  | 52818.44  | 37286.69  | 49529.66  |
| 17186.95  | 36662.4   | 21518.21  | 55702.45  | 72367.87  | 40703     | 30977.14  | 48439.12  | 35123.55  | 47686.69  |

|           |           |           |           |           |           |           |           |           |           |
|-----------|-----------|-----------|-----------|-----------|-----------|-----------|-----------|-----------|-----------|
| LN379.198 | LN379.197 | LN379.267 | LN379.268 |
| 38142.35  | 35668.81  | 67080.64  | 263451.2  | 243301.9  | 372222.3  | 280965    | 278519.2  | 191271.7  | 315226.3  |
| 42368.48  | 37058.79  | 73799.41  | 254030.3  | 422010.7  | 296178.4  | 255819.9  | 287265.4  | 207681.2  | 266251.1  |
| 41617.1   | 33461.85  | 69125.09  | 248109.5  | 231046.6  | 485901.7  | 297306.7  | 329524.9  | 211872.3  | 332379.8  |
| 36006.05  | 33156.65  | 68255.03  | 263526.7  | 249269    | 299573    | 291469.5  | 323509.7  | 208755    | 314681.9  |
| 40440.29  | 35682.76  | 77619.09  | 302326.7  | 252362.8  | 374875.8  | 288335.5  | 339191.3  | 212876    | 324243.2  |

|           |           |           |           |           |           |           |           |           |           |
|-----------|-----------|-----------|-----------|-----------|-----------|-----------|-----------|-----------|-----------|
| LN379.268 | LN380.978 | LN380.978 |
| 153782.6  | 159880.4  | 148786.2  | 183307.3  | 91703.31  | 126278.8  | 124522.1  | 135886.6  | 42293.44  | 70058.12  |
| 151584.6  | 181158.8  | 147679.9  | 168976.9  | 96346.2   | 135781.9  | 130520.5  | 124724.8  | 49959.75  | 68834.1   |
| 152217    | 185409.9  | 154897.9  | 158189.9  | 94364.86  | 118950.8  | 136112.3  | 134129.7  | 45192.37  | 73029.34  |
| 164381.1  | 183740.4  | 153703.7  | 171932.3  | 95472.96  | 137590.4  | 129420.2  | 133163.8  | 49344.26  | 76867.16  |
| 159659.3  | 188552.5  | 149291.6  | 160606    | 88983.93  | 132221.5  | 128774.1  | 146210.9  | 49960.93  | 80546.24  |

|           |           |           |           |           |           |           |           |           |           |
|-----------|-----------|-----------|-----------|-----------|-----------|-----------|-----------|-----------|-----------|
| LN380.978 | LN380.978 | LN380.997 | LN381.035 | LN381.035 | LN381.105 | LN381.178 | LN381.232 | LN382.994 | LN382.995 |
| 42941.81  | 73898.39  | 22398.85  | 39381.58  | 51149.97  | 16106.52  | 55131.1   | 15967.85  | 46159.85  | 43746.56  |
| 43230.87  | 73069.12  | 22719.77  | 38540.09  | 47720.25  | 13689.84  | 46815.3   | 15106.98  | 55829.22  | 39032.52  |
| 43878.57  | 76179.4   | 22263.68  | 16789.29  | 17218.93  | 13993.6   | 43763.54  | 16641.23  | 46920.97  | 45921.83  |
| 42992.32  | 76435.9   | 22086     | 39555.16  | 52967.61  | 13502.27  | 46840     | 11502.73  | 63940.18  | 29265.85  |
| 41564.02  | 74649.63  | 22462.25  | 44491.5   | 49050.72  | 13927.62  | 45287.13  | 10347.2   | 47214.32  | 41085.84  |



|           |           |           |           |           |           |           |           |           |           |
|-----------|-----------|-----------|-----------|-----------|-----------|-----------|-----------|-----------|-----------|
| LN382.995 | LN382.994 | LN382.994 | LN382.994 | LN382.995 | LN382.995 | LN382.994 | LN382.995 | LN382.995 | LN382.995 |
| 41625.3   | 46640.91  | 62670.51  | 50353.87  | 33465.88  | 30682.35  | 59775.23  | 44352     | 45149.1   | 28791.59  |
| 50156.9   | 48386.99  | 62676.41  | 37231.23  | 34637.72  | 26866.57  | 67466.77  | 35004.35  | 53701.75  | 38951.45  |
| 43096.52  | 42344.71  | 58392.96  | 48652.08  | 35618.3   | 33123.91  | 59719.5   | 38684.17  | 47584.52  | 30902.56  |
| 50285.84  | 67908.03  | 66160.25  | 40078.27  | 39486.87  | 33881.84  | 61187.33  | 41955.74  | 47382.43  | 32996.23  |
| 36557.84  | 47658.63  | 57809.01  | 50295.23  | 37216.95  | 33083.43  | 62401.79  | 39454.26  | 42986.97  | 29982.7   |

|           |           |           |           |           |           |           |           |           |           |
|-----------|-----------|-----------|-----------|-----------|-----------|-----------|-----------|-----------|-----------|
| LN382.995 | LN382.994 |
| 19383.29  | 50910.65  | 54291.62  | 24029.07  | 17836.61  | 19744.48  | 52581.89  | 38123.31  | 31717.87  | 50762.95  |
| 17050.25  | 52071.06  | 59217.39  | 22665.03  | 19507.42  | 19654.37  | 50810.53  | 45406.53  | 27784.11  | 60127.88  |
| 17346.94  | 49750.03  | 50682.36  | 23427.05  | 15284.06  | 20085.32  | 45224.68  | 40397.33  | 28640.28  | 44159.35  |
| 20828.02  | 51641.35  | 65753.94  | 26321.97  | 15092.34  | 18565.47  | 75144.76  | 43108.4   | 31414.21  | 45862.6   |
| 17963.03  | 52148.93  | 48704.45  | 21662.92  | 13415.46  | 16800.23  | 44105.52  | 40400.9   | 28388.09  | 45847.78  |

|           |           |           |           |           |           |           |           |           |           |
|-----------|-----------|-----------|-----------|-----------|-----------|-----------|-----------|-----------|-----------|
| LN382.995 | LN382.995 | LN382.995 | LN382.995 | LN382.995 | LN382.994 | LN382.995 | LN382.995 | LN382.994 | LN382.995 |
| 36917.57  | 41318.79  | 27180.98  | 61169.86  | 32905     | 45315.27  | 37190.95  | 18148.24  | 49596.82  | 51049.13  |
| 54578.6   | 28584.54  | 30004.17  | 66793.98  | 32585.3   | 54023.66  | 34377.73  | 18939.81  | 69960.58  | 34592.3   |
| 45776.73  | 42303.05  | 27192.43  | 60369.44  | 32087.39  | 49628.78  | 39587.5   | 18950.66  | 49706.16  | 56527.87  |
| 44845.81  | 40961.49  | 33766.18  | 66399.19  | 31220.38  | 52326.55  | 37733.9   | 18422.45  | 64529.3   | 42656.25  |
| 46170.07  | 36402.26  | 27992.58  | 57074.96  | 31394.52  | 48012.35  | 34705.47  | 21361.55  | 46933.21  | 56678.01  |

|           |           |           |           |           |           |           |           |           |           |
|-----------|-----------|-----------|-----------|-----------|-----------|-----------|-----------|-----------|-----------|
| LN382.995 | LN382.994 | LN382.995 | LN382.995 | LN382.995 | LN382.994 | LN382.995 | LN382.994 | LN382.994 | LN382.994 |
| 28668.53  | 36268.76  | 26776.94  | 28875.86  | 20076.94  | 52775.38  | 16625.69  | 51556.65  | 43840.6   | 62707.07  |
| 26814.69  | 39230.21  | 25758.08  | 33253.15  | 15822.81  | 46917.24  | 14568.86  | 45247.68  | 35051.14  | 56378.35  |
| 28598.75  | 38342.15  | 28785.31  | 25568.48  | 17641.62  | 44630.65  | 19619.88  | 49898.11  | 44529.1   | 70394.61  |
| 31875.59  | 46461.85  | 28199.12  | 40446.54  | 15422.07  | 36770.72  | 18473.58  | 64468.93  | 35771.22  | 70717.75  |
| 26919.37  | 36191.59  | 29198.49  | 25517.96  | 19813.33  | 51716.37  | 17723.09  | 56320.76  | 40854.52  | 61498.12  |

|           |           |           |           |           |           |           |           |           |           |
|-----------|-----------|-----------|-----------|-----------|-----------|-----------|-----------|-----------|-----------|
| LN382.994 | LN382.995 | LN382.995 | LN382.995 | LN382.994 | LN382.994 | LN382.995 | LN382.995 | LN382.995 | LN382.995 |
| 60168.85  | 54994.7   | 37610.04  | 50221.61  | 58802.68  | 36929.24  | 49845.27  | 30968.63  | 30261.33  | 25346.09  |
| 63802.36  | 42843.21  | 44637.26  | 51279.03  | 64043.86  | 40994.82  | 53927.91  | 33640.86  | 35075.69  | 29997.08  |
| 69825.55  | 53896.18  | 34988.78  | 49858.31  | 60102.99  | 36300.07  | 44572.46  | 34137.35  | 34483.8   | 26236.51  |
| 63894.13  | 62282.19  | 45982.84  | 49596     | 65855.87  | 49076.73  | 48614.24  | 35659.24  | 24981.83  | 31111.38  |
| 61963.44  | 49632.94  | 38424.66  | 48124.86  | 60093.65  | 38804.34  | 46982.18  | 30321.66  | 34062.09  | 29639.88  |

|           |           |           |           |           |           |           |           |           |           |
|-----------|-----------|-----------|-----------|-----------|-----------|-----------|-----------|-----------|-----------|
| LN382.995 | LN382.994 |
| 19044.1   | 39073.32  | 25393.94  | 33611.33  | 48316.31  | 25547.28  | 21485.91  | 37677.31  | 20849.37  | 42866.88  |
| 24081.79  | 57273.66  | 34007.42  | 23059.03  | 50004.61  | 30263.16  | 22164.35  | 42222.59  | 19294.89  | 54063.51  |
| 19130.77  | 38006.3   | 26392.85  | 29309.66  | 46115.5   | 26363.42  | 20650.44  | 39239.1   | 19869.74  | 42413.32  |
| 24261.44  | 40214     | 29462.8   | 32613.9   | 62069.8   | 24680.78  | 15510.07  | 46546.86  | 20503.13  | 55294.88  |
| 17752.58  | 39454.17  | 26069.5   | 33209.29  | 47739.05  | 27847.36  | 18388.81  | 39008.22  | 21473.13  | 41107.79  |

|           |           |           |           |           |           |           |           |           |           |
|-----------|-----------|-----------|-----------|-----------|-----------|-----------|-----------|-----------|-----------|
| LN382.995 | LN382.995 | LN382.995 | LN382.994 | LN382.995 | LN382.995 | LN382.995 | LN382.994 | LN382.995 | LN382.995 |
| 25761.57  | 53486.33  | 17619.08  | 93352.32  | 31996.75  | 35186.18  | 26259.1   | 58085.29  | 38305.15  | 19719.35  |
| 40376.82  | 44816     | 15219.89  | 80213.75  | 27642.77  | 40700.2   | 34409.69  | 63952.81  | 37099.05  | 30579.19  |
| 26405.05  | 53757.79  | 16414.81  | 85679.76  | 29373.11  | 35649.09  | 28540.26  | 62337.11  | 36605.57  | 23150.53  |
| 43496.58  | 40150.3   | 16687.86  | 80724.76  | 35100.66  | 44484.2   | 26565.08  | 69857.29  | 40615.82  | 21979.82  |
| 25607.55  | 55329.91  | 15059.01  | 82825.1   | 29574.62  | 34545.87  | 27691.76  | 61915.46  | 36789.78  | 21906.23  |

|           |           |           |           |           |           |           |           |           |           |
|-----------|-----------|-----------|-----------|-----------|-----------|-----------|-----------|-----------|-----------|
| LN382.995 | LN382.994 | LN382.995 | LN382.995 |
| 28138.64  | 34292.43  | 14248.27  | 15164.56  | 19786.22  | 33353.7   | 24732.53  | 62406.57  | 30494.38  | 29533.9   |
| 25917.81  | 33289.17  | 18787.65  | 20379.29  | 22588.06  | 62367.61  | 27730.03  | 67164.69  | 36632.52  | 28967.01  |
| 32674.41  | 28323.6   | 15421.04  | 14628.38  | 18244.19  | 34129.88  | 29541.19  | 62001.86  | 28738.93  | 31631.77  |
| 29549.38  | 33988.59  | 15877.45  | 16601.83  | 17261.63  | 34020.35  | 23197.8   | 77129.67  | 33178.04  | 32901.32  |
| 30478.86  | 37531.42  | 13203.57  | 13874.66  | 17524.56  | 31979.07  | 24549.33  | 60738.87  | 28254.37  | 31158.11  |



|           |           |           |           |           |           |           |           |           |           |
|-----------|-----------|-----------|-----------|-----------|-----------|-----------|-----------|-----------|-----------|
| LN382.995 | LN382.995 | LN382.994 | LN382.995 | LN382.994 | LN384.845 | LN384.862 | LN384.862 | LN384.862 | LN384.862 |
| 48661.98  | 24495.47  | 76383.93  | 17940.78  | 55633.76  | 30072.13  | 221489.5  | 134510.8  | 153858.3  | 210206.9  |
| 36782.82  | 24853.37  | 76422.46  | 23564.71  | 58495.4   | 31277.71  | 215236.6  | 135759.2  | 142964.9  | 213314.8  |
| 41646.64  | 25566.1   | 78915.21  | 16621.77  | 59322.42  | 30004.01  | 197606.8  | 112935.1  | 141967.7  | 172894.2  |
| 54858.59  | 28128.94  | 102175.3  | 16799.81  | 56420.94  | 34891.57  | 178608.2  | 136951.1  | 126536.9  | 176896.1  |
| 41259.78  | 23789.07  | 74568.95  | 16915.95  | 55835.06  | 37115.68  | 186760.2  | 22837.15  | 116935.7  | 185569.6  |

|           |           |           |           |           |           |           |           |           |           |
|-----------|-----------|-----------|-----------|-----------|-----------|-----------|-----------|-----------|-----------|
| LN384.862 |
| 69802.89  | 241436.3  | 194379.1  | 163428.4  | 230835.1  | 48961.2   | 227328.6  | 39554.09  | 22409.44  | 49317.3   |
| 70595.5   | 246499.8  | 211473.2  | 158716.9  | 206557.1  | 47847.57  | 217906.8  | 36999.21  | 23818.87  | 49211.83  |
| 69114.13  | 255557    | 183413.2  | 155407.6  | 183231.1  | 52354.49  | 216014.9  | 41228.41  | 21227.14  | 46528.15  |
| 62316.74  | 234804.4  | 182041.1  | 151949.2  | 209618.2  | 44631.55  | 204499.4  | 36249.72  | 22220.52  | 47340.66  |
| 67634.99  | 218781.4  | 191319    | 140624    | 175435.4  | 44084.91  | 204925.2  | 38728.14  | 19916.1   | 46235.38  |

|           |           |           |           |           |           |           |           |           |           |
|-----------|-----------|-----------|-----------|-----------|-----------|-----------|-----------|-----------|-----------|
| LN384.862 | LN384.863 | LN384.863 | LN384.863 |
| 43024.07  | 176975.6  | 159682.5  | 43252.34  | 66430.11  | 151778.1  | 40455.79  | 80668.9   | 89496.02  | 68330.21  |
| 41543.09  | 184785.6  | 161586.7  | 44310.43  | 67024.31  | 146472.9  | 43573.47  | 84585.67  | 88825.59  | 63193.31  |
| 44593.62  | 167339.4  | 151190.6  | 40376.83  | 60918.62  | 143271.9  | 42310.78  | 75499.11  | 88526.96  | 68313.3   |
| 47719.32  | 173123.8  | 169385.1  | 37087.59  | 56895.66  | 136329.2  | 37794.07  | 71778.55  | 89679.16  | 63921.81  |
| 38148.24  | 170484.3  | 150762    | 43904.32  | 54954.45  | 129793.7  | 36807.86  | 72299.17  | 82123.52  | 63286.4   |

|           |           |           |           |           |           |           |           |           |           |
|-----------|-----------|-----------|-----------|-----------|-----------|-----------|-----------|-----------|-----------|
| LN384.935 |
| 324969.2  | 136646.7  | 458487.8  | 364123.7  | 183902.5  | 298230    | 255226.9  | 156161.8  | 437557.8  | 198143.5  |
| 329569.4  | 169783.5  | 332241.2  | 234572.8  | 142837.1  | 312029.5  | 344499    | 172205.8  | 392429.1  | 190436.6  |
| 306457.7  | 171454.5  | 410358.7  | 416033.8  | 179605    | 413916.9  | 330446.2  | 159718.6  | 495050.5  | 145518.2  |
| 341418.8  | 146781.9  | 444821.3  | 272085.7  | 149905.9  | 392350.4  | 369040.3  | 239321.4  | 574679.2  | 152008.4  |
| 292078.5  | 142950.4  | 230367.5  | 260275.4  | 186902    | 496185.7  | 227763.3  | 197543.1  | 526486.1  | 134585.5  |

|           |           |           |           |           |           |           |           |           |           |
|-----------|-----------|-----------|-----------|-----------|-----------|-----------|-----------|-----------|-----------|
| LN384.935 |
| 614262.7  | 565405.3  | 537759.6  | 358658.6  | 434203.1  | 520682.8  | 427247.5  | 189913.1  | 499297.7  | 409608    |
| 488706.5  | 469089.7  | 498381.1  | 385915    | 499162.3  | 400227.6  | 431616.2  | 180776.6  | 364649.9  | 436577.4  |
| 395801    | 458841.4  | 420868.6  | 352289    | 454062.7  | 531367.3  | 385486.4  | 233762.3  | 439971.6  | 495588.2  |
| 482117.9  | 468006.5  | 497375.7  | 400754.6  | 628193.8  | 417553.7  | 305756.3  | 218354.2  | 421591.7  | 541380.7  |
| 466916.9  | 517637.2  | 477921.3  | 380900.1  | 413288.6  | 511398.8  | 372062    | 154269.3  | 414795    | 406359    |

|           |           |           |           |           |           |           |           |           |           |
|-----------|-----------|-----------|-----------|-----------|-----------|-----------|-----------|-----------|-----------|
| LN384.935 |
| 401119.6  | 374281.1  | 340521.3  | 290679.2  | 331951    | 422957.3  | 414406.4  | 315535.7  | 249876.1  | 413881    |
| 401156.8  | 400400.1  | 357709.6  | 303898.2  | 432792.1  | 426395.7  | 526409.2  | 398824.4  | 200591.4  | 411069.2  |
| 417807.8  | 353804.9  | 420866.4  | 312470.1  | 376666.7  | 389212.9  | 368475.3  | 301339.6  | 274437.6  | 359747.5  |
| 390079.8  | 424149.7  | 374857    | 309278.6  | 280555.3  | 387452    | 402029.6  | 290469.4  | 309509.7  | 492001.9  |
| 388139.1  | 352495.8  | 414709.4  | 306980.5  | 394148.9  | 415560.7  | 284281.9  | 305998.3  | 251784.8  | 596750.7  |

|           |           |           |           |           |           |           |           |           |           |
|-----------|-----------|-----------|-----------|-----------|-----------|-----------|-----------|-----------|-----------|
| LN384.935 |
| 491772    | 333315    | 486360.4  | 457931.4  | 304805.1  | 416200    | 310437    | 350662.1  | 254831.2  | 395199.3  |
| 335942.8  | 323510    | 407942.9  | 455288.1  | 373756.9  | 473724.4  | 453013.4  | 340539.5  | 227461.4  | 620746.3  |
| 401957.8  | 296103.4  | 600678.7  | 438595.7  | 405527.4  | 423161.5  | 273372.2  | 273768.7  | 263750    | 384032.1  |
| 409362.9  | 441059.3  | 391308.7  | 407211.9  | 432994.4  | 423772.4  | 271305.4  | 326356.1  | 231969.5  | 415148.5  |
| 574531.8  | 312453.7  | 498366.7  | 402036.1  | 361339    | 659100.4  | 296484.6  | 387561.6  | 224219.2  | 438433.3  |

|           |           |           |           |           |           |           |           |           |           |
|-----------|-----------|-----------|-----------|-----------|-----------|-----------|-----------|-----------|-----------|
| LN384.935 |
| 353399.7  | 332531.5  | 461421.7  | 204991.2  | 332754.7  | 255573.9  | 237183.8  | 400069.2  | 308354.4  | 226306.6  |
| 295443.9  | 178066.5  | 356339.6  | 331808.2  | 365224.8  | 279777.8  | 285425.6  | 313588.5  | 263026.9  | 255396.7  |
| 289667.8  | 203734.5  | 523092.6  | 244705.8  | 408635.2  | 269230.5  | 234906.9  | 313553.5  | 318585.6  | 231168.2  |
| 266785.3  | 178225.8  | 332626.8  | 261656.4  | 307443.4  | 355192.4  | 282305.9  | 306845.5  | 395122.9  | 278576.4  |
| 242465.6  | 179890.8  | 508508.6  | 242814.7  | 303999.7  | 269630    | 378617.1  | 235056.2  | 434390.9  | 209987    |



|           |           |           |           |           |           |           |           |           |           |
|-----------|-----------|-----------|-----------|-----------|-----------|-----------|-----------|-----------|-----------|
| LN384.935 |
| 336645.9  | 100315.2  | 221073    | 208924.8  | 426479.5  | 216475.5  | 214358.3  | 198245.3  | 324361.5  | 188709.5  |
| 276930.5  | 83637.56  | 249024.8  | 282078.3  | 459610    | 214408.7  | 221194.2  | 198873.5  | 367288.9  | 217501.8  |
| 300200.7  | 82886.12  | 174020.7  | 180134.1  | 358747.8  | 174991    | 209318.5  | 199637.4  | 318968.8  | 177114.4  |
| 271618.2  | 99897.56  | 163774.9  | 199517.8  | 363981.1  | 163906.7  | 278684.5  | 204828.2  | 335641.9  | 217980.2  |
| 250589.6  | 126835.9  | 225584    | 150311    | 363769.4  | 163645.9  | 304656.8  | 169140.4  | 395509.2  | 205982.1  |

|           |           |           |           |           |           |           |           |           |           |
|-----------|-----------|-----------|-----------|-----------|-----------|-----------|-----------|-----------|-----------|
| LN384.935 |
| 209674.2  | 226745.2  | 201396.3  | 211859    | 199716.8  | 228282.7  | 183705.6  | 168153.5  | 184074.1  | 94701.62  |
| 159628.6  | 238671.3  | 202990.8  | 178482.6  | 226574.7  | 266127.3  | 173593.5  | 125152.3  | 213485    | 64209.71  |
| 175551.2  | 184451.4  | 192880.8  | 163045.8  | 243489.7  | 227749.1  | 208927.1  | 124220.6  | 226165.9  | 70270.84  |
| 134600.4  | 266929.2  | 202538.2  | 165313.7  | 170923.7  | 227162.9  | 147762.7  | 110288.9  | 257022    | 66965.56  |
| 175501.2  | 202913    | 152448.6  | 148354.8  | 227632.7  | 243478.9  | 237410.8  | 106092.3  | 230964    | 67327.1   |

|           |           |           |           |           |           |           |           |           |           |
|-----------|-----------|-----------|-----------|-----------|-----------|-----------|-----------|-----------|-----------|
| LN384.935 | LN384.935 | LN384.935 | LN384.935 | LN384.935 | LN384.934 | LN384.935 | LN384.935 | LN384.935 | LN384.935 |
| 58689.13  | 52475.41  | 35238.59  | 49358.25  | 52590.99  | 230969.4  | 72577.59  | 37796.13  | 24390.12  | 67654.54  |
| 70383.88  | 74341.86  | 26739.07  | 48717.23  | 50135.36  | 215190.1  | 55140.18  | 36823.56  | 20303.71  | 60767.6   |
| 61518.3   | 72220.68  | 35224.73  | 36268.96  | 61185.86  | 197017.1  | 60831.58  | 35154.12  | 23227.81  | 59545.86  |
| 62415.96  | 77455.76  | 32516.88  | 46811.59  | 53539.92  | 203898.2  | 59744     | 33710.33  | 22723.51  | 63318.5   |
| 72787.89  | 64376.6   | 31360.55  | 37570.2   | 54820.69  | 227941.4  | 61689.58  | 31992.18  | 22471.08  | 61428.54  |

|           |           |           |           |           |           |           |           |           |           |
|-----------|-----------|-----------|-----------|-----------|-----------|-----------|-----------|-----------|-----------|
| LN385.190 | LN385.844 | LN386.194 | LN386.471 | LN386.840 | LN387.025 | LN387.026 | LN387.025 | LN387.026 | LN387.025 |
| 115711.3  | 22878.82  | 18330.11  | 145622.4  | 253445    | 46595.73  | 30320.18  | 36982.74  | 28179.63  | 46978.55  |
| 130517.1  | 18577.36  | 17141.11  | 152328    | 253794.8  | 41244.57  | 31408.23  | 35740.08  | 27856.16  | 37716.08  |
| 117851.5  | 20141.23  | 18156.77  | 144716.2  | 248295.6  | 42836.23  | 30656.22  | 42295.56  | 30533.3   | 39170.65  |
| 117502.6  | 17272.32  | 16324.28  | 136022.4  | 295761.6  | 42467.16  | 29898.47  | 37748.13  | 29220.65  | 41584.82  |
| 97888.25  | 21120.2   | 16326.44  | 117683.3  | 328333.2  | 45443.09  | 29382.38  | 32899.17  | 30327.1   | 39827.73  |

|           |           |           |           |           |           |           |           |           |           |
|-----------|-----------|-----------|-----------|-----------|-----------|-----------|-----------|-----------|-----------|
| LN387.025 | LN387.025 | LN387.026 | LN387.026 | LN387.025 | LN387.025 | LN387.025 | LN387.026 | LN387.025 | LN387.026 |
| 35916.7   | 39797.99  | 31746.5   | 29930.66  | 41316     | 84817.81  | 28181.81  | 34473.16  | 33822.66  | 39694.71  |
| 38656.14  | 38452.67  | 28840.31  | 35251.82  | 39005.85  | 81225.03  | 28115.79  | 36844.59  | 35353.38  | 33234.32  |
| 36549     | 39441.09  | 28476.94  | 31532.25  | 41884.09  | 82136.95  | 27221.33  | 36173.4   | 35055.32  | 39256.37  |
| 38145.04  | 42499.99  | 29620.96  | 32357.03  | 39934.35  | 81494     | 27826.82  | 34778.24  | 33864.09  | 39365.77  |
| 36676.22  | 40855.78  | 25909.97  | 25441.57  | 40961.84  | 84189.69  | 26608.35  | 28460.85  | 31835.96  | 34486.89  |

|           |           |           |           |           |           |           |           |           |           |
|-----------|-----------|-----------|-----------|-----------|-----------|-----------|-----------|-----------|-----------|
| LN387.025 | LN387.026 | LN387.026 | LN387.026 | LN387.025 | LN387.025 | LN387.025 | LN387.025 | LN387.025 | LN387.025 |
| 47197.86  | 20345.42  | 31326.7   | 24025.26  | 52622.32  | 42844.23  | 45562.75  | 61746.79  | 35345.18  | 38944.56  |
| 48608.66  | 19189.41  | 30823.29  | 20638.79  | 55155.35  | 41519.22  | 45397.31  | 61137.29  | 35039.47  | 41957.02  |
| 49632.3   | 18316.36  | 29648.34  | 22192.99  | 53126.39  | 39092.68  | 44043.01  | 59717.74  | 33456.47  | 35915.75  |
| 47489.21  | 19132.26  | 29612.89  | 23748.05  | 57825.96  | 42690.31  | 45047.54  | 62998.19  | 32960.03  | 37915.57  |
| 47261.5   | 17995.94  | 26780.03  | 19823.19  | 49199.45  | 38375.06  | 49564.5   | 67022.87  | 31080     | 35547.32  |

|           |           |           |           |           |           |           |           |           |           |
|-----------|-----------|-----------|-----------|-----------|-----------|-----------|-----------|-----------|-----------|
| LN387.025 | LN387.026 | LN387.026 | LN387.025 |
| 57887.91  | 51412.65  | 37365.08  | 58677.3   | 37455.3   | 47834.13  | 33401.46  | 43345.99  | 56305.9   | 64169.3   |
| 55098.57  | 53734.9   | 38938.16  | 61310.06  | 37661.14  | 49293.41  | 34221.12  | 40191.48  | 50636.3   | 63321.98  |
| 54875.74  | 55305.19  | 38766.19  | 50605.27  | 35298.46  | 47699.37  | 34348.9   | 42684.06  | 51271.59  | 62092.5   |
| 53805.62  | 57627.22  | 41794.81  | 62243.4   | 32965.64  | 49662.91  | 34033.9   | 44212.39  | 54099.93  | 62003.99  |
| 48563.54  | 50227.25  | 37475.83  | 59721.07  | 33887.15  | 45591.36  | 32821.29  | 42229.32  | 54730.59  | 55484.92  |

|           |           |           |           |           |           |           |           |           |           |
|-----------|-----------|-----------|-----------|-----------|-----------|-----------|-----------|-----------|-----------|
| LN387.026 | LN387.026 | LN387.025 | LN387.025 | LN387.026 | LN387.026 | LN387.026 | LN387.026 | LN387.026 | LN387.026 |
| 37806.42  | 37995.68  | 38858.93  | 42951.84  | 33968.31  | 53650.28  | 31946.49  | 31771.68  | 46537.2   | 26040.24  |
| 37449.46  | 36458.49  | 41398.94  | 42869.43  | 35010.9   | 54026.59  | 33255.3   | 33097.89  | 48538.39  | 27205.35  |
| 36482.99  | 41677.36  | 40145.12  | 42104.22  | 34213.12  | 53295.04  | 30085.67  | 34552.47  | 48321.45  | 25514.12  |
| 40372.05  | 40406.46  | 42559.4   | 43433.65  | 31141.86  | 54713.34  | 29616.14  | 29447.14  | 49876.11  | 25655.44  |
| 32561.51  | 34377.22  | 40542.57  | 46438.86  | 29296.57  | 51868.95  | 28944.66  | 28077.15  | 41754.13  | 25134     |



|           |           |           |           |           |           |           |           |           |           |
|-----------|-----------|-----------|-----------|-----------|-----------|-----------|-----------|-----------|-----------|
| LN387.026 | LN387.026 | LN387.026 | LN387.025 | LN387.026 | LN387.150 | LN387.151 | LN387.202 | LN387.215 | LN387.842 |
| 31563.61  | 34925.44  | 43041.36  | 59545.66  | 34877.08  | 59793.71  | 108597.4  | 62714.4   | 17005.69  | 31338.31  |
| 32709.37  | 37534.83  | 43569.9   | 59211.74  | 33412.85  | 52698.87  | 114806.4  | 73174.69  | 17659.77  | 28653.99  |
| 30388.1   | 36543.95  | 38219.63  | 61972.54  | 34917.73  | 55781.06  | 117920.1  | 71479.79  | 19855.95  | 25782.95  |
| 29494.71  | 36018.28  | 39120.26  | 61356.26  | 33077.48  | 52866.87  | 111461.1  | 74447.33  | 17267.99  | 35944.06  |
| 29274.91  | 33267.69  | 41807.57  | 63914.74  | 31983.2   | 57059.34  | 110808.4  | 72153.16  | 16045.55  | 33544.27  |

|           |           |           |           |           |           |           |           |           |           |
|-----------|-----------|-----------|-----------|-----------|-----------|-----------|-----------|-----------|-----------|
| LN388.841 | LN388.873 | LN388.984 | LN389.004 | LN389.005 | LN389.004 | LN389.005 | LN389.004 | LN389.004 | LN389.004 |
| 95251.93  | 103659.2  | 71378.11  | 24559.81  | 19550.75  | 53697.67  | 29824.51  | 71242.62  | 37204.62  | 30975.06  |
| 88118.75  | 112280.5  | 68217.69  | 30771.22  | 24441.67  | 42052.11  | 22755.27  | 52473.23  | 36444.84  | 42893.18  |
| 93480.79  | 122833    | 72792.44  | 33824.29  | 24393.25  | 43352.4   | 22279.37  | 54125.49  | 35675.76  | 42144.21  |
| 97720.32  | 96964.5   | 68784.44  | 34902.61  | 22954.78  | 46932.72  | 20681.26  | 50458.48  | 35563.02  | 42035.65  |
| 115660.4  | 150881.3  | 70060.71  | 26061.12  | 27464.4   | 54878     | 18042.13  | 55391.22  | 42330.01  | 48461.01  |

|           |           |           |           |           |           |           |           |           |           |
|-----------|-----------|-----------|-----------|-----------|-----------|-----------|-----------|-----------|-----------|
| LN389.004 | LN389.004 | LN389.005 | LN389.004 | LN389.005 | LN389.005 | LN389.004 | LN389.005 | LN389.005 | LN389.005 |
| 32181.12  | 30936.7   | 15040.73  | 45195.21  | 35242.12  | 19179.93  | 10612.88  | 31176.53  | 24475.43  | 11236.54  |
| 30677.12  | 32274.16  | 18778.08  | 47840.61  | 31356.64  | 29556.95  | 15549.51  | 27019.66  | 24982.66  | 18706.76  |
| 29829.25  | 31492.92  | 17568.28  | 47089.06  | 31221.16  | 27971.98  | 14918.7   | 25842.2   | 26377.09  | 19707.87  |
| 31485.82  | 31705.62  | 18484.88  | 49453.63  | 32643.15  | 29284.25  | 16003.99  | 29339.68  | 27074.21  | 19173.99  |
| 32169.75  | 44939.44  | 12716.15  | 39605.82  | 36222.38  | 36796.47  | 13512.31  | 35666.58  | 21940.85  | 13060.28  |

|           |           |           |           |           |           |           |           |           |           |
|-----------|-----------|-----------|-----------|-----------|-----------|-----------|-----------|-----------|-----------|
| LN389.005 | LN389.005 | LN389.004 | LN389.005 | LN389.004 | LN389.004 | LN389.005 | LN389.005 | LN389.004 | LN389.005 |
| 35760.12  | 32994.97  | 39402.06  | 26210.52  | 36106.85  | 76761.77  | 19854.2   | 21903.46  | 69876.57  | 17301.48  |
| 22654.89  | 35457.34  | 40568.89  | 21532.48  | 44820.28  | 54167.93  | 17345.19  | 17178.82  | 61581.1   | 18423.14  |
| 22262.72  | 30791.69  | 39645.06  | 23895.54  | 47496.22  | 54415.58  | 14878.54  | 16744.25  | 57403.25  | 17496.03  |
| 25058.05  | 29297.23  | 39606.65  | 21606.92  | 45914.9   | 60189.37  | 16389.85  | 17474.14  | 64891.78  | 17551.51  |
| 21526.97  | 37616.17  | 40925.72  | 29160.92  | 42516.87  | 54763.99  | 16626.1   | 19256.11  | 75306.47  | 19872.22  |

|           |           |           |           |           |           |           |           |           |           |
|-----------|-----------|-----------|-----------|-----------|-----------|-----------|-----------|-----------|-----------|
| LN389.004 | LN389.005 | LN389.004 | LN389.005 | LN389.004 | LN389.005 | LN389.004 | LN389.005 | LN389.005 | LN389.005 |
| 28664.3   | 43866.18  | 40339.38  | 32147.38  | 49046.91  | 20034.2   | 35265.54  | 14977.15  | 21697.4   | 38094.22  |
| 33998.35  | 37232.78  | 35671.66  | 35867.48  | 43221.68  | 25717.3   | 39932.19  | 17151.4   | 25587.65  | 29907.25  |
| 36354.18  | 35633.68  | 34044.46  | 35052.41  | 45402.8   | 25724.1   | 36059.02  | 14584.83  | 21322.04  | 33724.7   |
| 36502.15  | 38101.88  | 34562.87  | 32790.28  | 44503.19  | 28709.84  | 37763.15  | 14270.25  | 21464.19  | 32411.92  |
| 37876.08  | 38047.57  | 52930.3   | 38373.09  | 53709.9   | 25631.19  | 44098.44  | 13723.47  | 24578.58  | 28168.97  |

|           |           |           |           |           |           |           |           |           |           |
|-----------|-----------|-----------|-----------|-----------|-----------|-----------|-----------|-----------|-----------|
| LN389.005 | LN389.004 | LN389.005 | LN389.004 | LN389.004 | LN389.004 | LN389.004 | LN389.005 | LN389.004 | LN389.004 |
| 31036.03  | 39104.67  | 30952.08  | 40877.29  | 30120.73  | 37935.32  | 32644.37  | 21408.78  | 38093.65  | 43493.02  |
| 27752.53  | 28310.86  | 28706.87  | 39975.38  | 32741.66  | 44594.74  | 38464.5   | 19171.09  | 37956.18  | 42179.78  |
| 29196.18  | 28358.24  | 27650.33  | 36460.39  | 34335.56  | 44088.03  | 36571.53  | 22305.32  | 39469.17  | 43618.13  |
| 25411.52  | 31621.51  | 28164.27  | 38252.61  | 34243.12  | 40643.1   | 35724     | 20657.62  | 42193.27  | 40767.19  |
| 35589.7   | 32951.47  | 31784.48  | 37905.19  | 26942.64  | 41956.16  | 32535.23  | 21002.61  | 40345.88  | 52692.54  |

|           |           |           |           |           |           |           |           |           |           |
|-----------|-----------|-----------|-----------|-----------|-----------|-----------|-----------|-----------|-----------|
| LN389.005 | LN389.004 | LN389.005 | LN389.004 | LN389.005 | LN389.005 | LN389.004 | LN389.005 | LN389.004 | LN389.005 |
| 13253.05  | 47471.36  | 14487.3   | 33015.91  | 35038.09  | 15750.61  | 30990.38  | 21377.89  | 37368.78  | 22364.61  |
| 18273.77  | 32241.7   | 14748.87  | 38264.54  | 33686.38  | 24887.45  | 36044.49  | 22042.07  | 38495.88  | 27918.05  |
| 17483.96  | 33460.99  | 15217.01  | 35317.22  | 38143.99  | 22083.52  | 36365.6   | 22613.9   | 39098.33  | 27862.24  |
| 14896.12  | 36863.91  | 14754.63  | 35871.07  | 33463.45  | 23198.54  | 31778.44  | 21023.44  | 39332.29  | 28910.37  |
| 20983.39  | 35114.28  | 13610.23  | 42576.67  | 32342.87  | 13592.9   | 53065.31  | 23473.27  | 50617.55  | 33149.77  |

|           |           |           |           |           |           |           |           |           |           |
|-----------|-----------|-----------|-----------|-----------|-----------|-----------|-----------|-----------|-----------|
| LN389.004 | LN389.004 | LN389.004 | LN389.004 | LN389.005 | LN389.004 | LN389.005 | LN389.005 | LN389.005 | LN389.005 |
| 32727.86  | 26941.35  | 31994.81  | 32173.42  | 16249.51  | 54149.74  | 23737.83  | 23054.38  | 33611.01  | 25791.16  |
| 36237.88  | 22701.06  | 36827.93  | 28205.56  | 13834.94  | 43674.7   | 26910.35  | 22742.41  | 18695.42  | 32597.94  |
| 39455.01  | 22264.61  | 33337.89  | 27548.98  | 12930.73  | 42101.93  | 25895.16  | 22187.22  | 21711.86  | 31249.12  |
| 38394.08  | 25160.64  | 34579.76  | 27994.94  | 14149.68  | 40434.2   | 25508.7   | 22770.81  | 20697.59  | 30750.86  |
| 33675.93  | 25004.04  | 35152.98  | 37160.35  | 16707.79  | 44662.53  | 25555.1   | 18374.85  | 30914.56  | 42345.82  |



|           |           |           |           |           |           |           |           |           |           |
|-----------|-----------|-----------|-----------|-----------|-----------|-----------|-----------|-----------|-----------|
| LN389.004 | LN389.004 | LN389.005 | LN389.004 | LN389.004 | LN389.005 | LN389.004 | LN389.004 | LN389.005 | LN389.005 |
| 41092.05  | 41742.65  | 41069.34  | 44325.31  | 52456.99  | 20865.27  | 35882.54  | 26229.73  | 27593.58  | 19563.17  |
| 45307.84  | 41940.76  | 37415.85  | 35489.05  | 44640.86  | 24075.82  | 38019.93  | 28561.01  | 27933.27  | 24830.79  |
| 48490.13  | 41782.31  | 36333.64  | 39873.25  | 38354.23  | 23226.33  | 37662.24  | 28081.31  | 28862.98  | 28375.24  |
| 45413.19  | 42167.05  | 36747.37  | 43358.92  | 43821.67  | 25861.27  | 33293.92  | 28539.87  | 26834.81  | 28433.51  |
| 46891.82  | 32388.26  | 35215.58  | 44393.95  | 36309.12  | 29913.86  | 33380.82  | 30567.97  | 34924.73  | 24046.26  |

|           |           |           |           |           |           |           |           |           |           |
|-----------|-----------|-----------|-----------|-----------|-----------|-----------|-----------|-----------|-----------|
| LN389.005 | LN389.004 | LN389.005 | LN389.004 | LN389.005 | LN389.859 | LN390.837 | LN390.870 | LN391.000 | LN391.001 |
| 62832.19  | 41454.96  | 34931.32  | 24940.71  | 27886.48  | 12075.1   | 30760.54  | 41559.01  | 208646.7  | 100442.6  |
| 51575.47  | 41704.87  | 30524.04  | 30116.86  | 31257.98  | 15923.86  | 24572.82  | 39827.34  | 149173.7  | 78715.12  |
| 47666.98  | 41804.49  | 28423.16  | 34739.33  | 31491.01  | 15285.23  | 22000.04  | 40273.87  | 141207.6  | 132194.2  |
| 51374.83  | 47574.81  | 28471.78  | 34274.41  | 30558.49  | 14828.4   | 20437.02  | 33068.66  | 172830.1  | 93692.15  |
| 47571.29  | 47592.73  | 25948.17  | 18965.37  | 31803.04  | 13563.71  | 22695.79  | 30177.57  | 133931.2  | 71922.17  |

|           |           |           |           |           |           |           |           |           |           |
|-----------|-----------|-----------|-----------|-----------|-----------|-----------|-----------|-----------|-----------|
| LN391.001 | LN391.001 | LN391.001 | LN391.001 | LN391.000 | LN391.001 | LN391.001 | LN391.001 | LN391.001 | LN391.001 |
| 119675.5  | 62545.52  | 56523.71  | 71321.26  | 152174.3  | 113739.4  | 58910.95  | 24179.08  | 66557.92  | 69520.21  |
| 79470.08  | 59789.87  | 60511.44  | 68060.73  | 143790.1  | 99300.47  | 78817.01  | 19125.69  | 81269.82  | 114330.8  |
| 68742.85  | 78568.24  | 64930.09  | 81457.56  | 142948.4  | 85410.68  | 63573.32  | 37056.64  | 71667.68  | 123548.6  |
| 60933.71  | 52085.39  | 74253     | 86121.11  | 147393.8  | 102470.3  | 71475.31  | 18526.67  | 91598.89  | 111286.9  |
| 67115.79  | 103668.5  | 70760.69  | 61006.02  | 138830.8  | 110246.4  | 47312.25  | 17050.34  | 75377.39  | 83904.13  |

|           |           |           |           |           |           |           |           |           |           |
|-----------|-----------|-----------|-----------|-----------|-----------|-----------|-----------|-----------|-----------|
| LN391.001 | LN391.001 | LN391.001 | LN391.000 | LN391.001 | LN391.001 | LN391.001 | LN391.001 | LN391.000 | LN391.001 |
| 64988.45  | 138330.3  | 112148.4  | 88822.23  | 91413.64  | 51869.23  | 112707.9  | 106654.2  | 172358.9  | 70872.94  |
| 40267.02  | 150548.6  | 122570.5  | 116794    | 213664.9  | 54486.34  | 124538.9  | 145008.4  | 122418.3  | 90462.61  |
| 64628.04  | 108145.8  | 91003.58  | 125246.8  | 89264.59  | 47556.62  | 118884.2  | 106416.2  | 128661.4  | 66528.74  |
| 40854.8   | 111505.5  | 108755.9  | 156600    | 89285.41  | 80072.26  | 104898.7  | 102440.2  | 125500.9  | 66865.26  |
| 51998.91  | 112628.1  | 84636.37  | 105935.9  | 104783.5  | 49986.39  | 100880.6  | 166081.4  | 102571.6  | 67254.12  |

|           |           |           |           |           |           |           |           |           |           |
|-----------|-----------|-----------|-----------|-----------|-----------|-----------|-----------|-----------|-----------|
| LN391.001 | LN391.001 | LN391.001 | LN391.001 | LN391.001 | LN391.001 | LN391.000 | LN391.001 | LN391.001 | LN391.001 |
| 91347.86  | 101589.1  | 42329.92  | 41329.73  | 112250.5  | 91168.21  | 146225.3  | 88470.3   | 100591.9  | 31693.82  |
| 119313.1  | 97760.02  | 39430.07  | 44402.13  | 108271.4  | 136090.3  | 174119.6  | 91027.4   | 103354    | 37080.42  |
| 104758.9  | 97259.02  | 32869.84  | 51166.55  | 95850.02  | 93508.46  | 114345    | 70741.41  | 96481.37  | 26552.64  |
| 116089.9  | 126838.5  | 38373.25  | 41541.47  | 88715.17  | 140036.9  | 133647.1  | 92361.38  | 84047.96  | 37094.35  |
| 94319.18  | 101743    | 33274.48  | 42051.35  | 133911.1  | 97456.52  | 161596.3  | 88315.61  | 91748.94  | 36116.79  |

|           |           |           |           |           |           |           |           |           |           |
|-----------|-----------|-----------|-----------|-----------|-----------|-----------|-----------|-----------|-----------|
| LN391.000 | LN391.001 | LN391.001 | LN391.001 | LN391.001 | LN391.001 | LN391.000 | LN391.001 | LN391.001 | LN391.001 |
| 181853.1  | 90133.58  | 143285.8  | 71335.46  | 67959.1   | 103574.1  | 154912.4  | 160815.6  | 99051.98  | 107288.1  |
| 133822.4  | 103620.3  | 86917.76  | 60770.8   | 51848.17  | 103055.8  | 162031.3  | 93009.16  | 129213.6  | 92739.07  |
| 185542.4  | 75712.11  | 95304.31  | 62922.02  | 78644.71  | 144710    | 170373.2  | 107032.6  | 113559.2  | 95076.1   |
| 119665.9  | 97567.91  | 132581.2  | 70940.3   | 59875.75  | 124491.9  | 158953    | 122152    | 107803.6  | 77795.42  |
| 195505.8  | 66718.9   | 94908.41  | 76377.45  | 65148.41  | 127660.8  | 144675.1  | 129594.6  | 158303.9  | 81060.04  |

|           |           |           |           |           |           |           |           |           |           |
|-----------|-----------|-----------|-----------|-----------|-----------|-----------|-----------|-----------|-----------|
| LN391.001 | LN391.000 | LN391.001 |
| 40010.32  | 91716.49  | 96187.5   | 51124.45  | 30306.77  | 114089.9  | 62783.42  | 37696.66  | 146181.8  | 68710.66  |
| 46873.85  | 85935.45  | 115617.8  | 63582.74  | 37703.31  | 65239.29  | 85661.9   | 30368.94  | 147829.9  | 91414.02  |
| 56328.77  | 66356.99  | 112514.6  | 53552.59  | 31543.71  | 75236.32  | 61746.87  | 31508.26  | 160590.3  | 69766.59  |
| 41717.7   | 73918.16  | 121249.2  | 72976.75  | 37048.08  | 74385.81  | 61814.75  | 30983.54  | 122884.5  | 67262.87  |
| 51708.39  | 73938.99  | 97132.34  | 66543.85  | 36826.38  | 77513.26  | 75808.06  | 45155.8   | 192237.3  | 109766.2  |

|           |           |           |           |           |           |           |           |           |           |
|-----------|-----------|-----------|-----------|-----------|-----------|-----------|-----------|-----------|-----------|
| LN391.001 | LN391.001 | LN391.001 | LN391.001 | LN391.000 | LN391.000 | LN391.001 | LN391.001 | LN391.000 | LN391.001 |
| 40835.74  | 44901.45  | 58798.01  | 32316.01  | 223655.9  | 130816.6  | 132077.8  | 67781.54  | 142590    | 41457.15  |
| 30577.23  | 64501.02  | 51277.29  | 33591.89  | 144922.4  | 118524.9  | 103612    | 67967.19  | 133234.1  | 71599.67  |
| 54195.72  | 68769.74  | 73519.51  | 37142.71  | 113363.1  | 133270.7  | 111619.1  | 81511.06  | 112528.6  | 43531.8   |
| 38519.16  | 71357.3   | 48368.3   | 35549.31  | 165880.7  | 165915.1  | 81602.46  | 75468.64  | 97062.02  | 49284.37  |
| 41602.56  | 63657.02  | 68915.77  | 26905.15  | 146949.2  | 113446.3  | 114442    | 66706.52  | 110139.1  | 43303.8   |



|           |           |           |           |           |           |           |           |           |           |
|-----------|-----------|-----------|-----------|-----------|-----------|-----------|-----------|-----------|-----------|
| LN391.000 | LN391.001 |
| 128453.8  | 82009.31  | 30973.12  | 85713.64  | 79755.78  | 79370.22  | 104891.7  | 54344.03  | 44773.26  | 94506.42  |
| 94315.83  | 63813.72  | 49524.33  | 66934.21  | 113046.7  | 113496.1  | 84498.03  | 77090.47  | 37823.48  | 162095.8  |
| 102019.6  | 65066.31  | 33062.79  | 69996.97  | 85603.48  | 73661.2   | 85590.43  | 66311.16  | 41690.76  | 100243.9  |
| 128168.4  | 65624.31  | 34123.81  | 79203.05  | 89218.71  | 80719.65  | 70276.82  | 66484.38  | 32483.16  | 93959.47  |
| 126366.6  | 92979.22  | 28169.85  | 54112.47  | 92185.1   | 83126.54  | 90515.4   | 74051.72  | 32946.35  | 96381.84  |

|           |           |           |           |           |           |           |           |           |           |
|-----------|-----------|-----------|-----------|-----------|-----------|-----------|-----------|-----------|-----------|
| LN391.001 | LN391.000 | LN391.001 |
| 91326.2   | 106860.5  | 59545.63  | 35308.78  | 73433.05  | 50763.79  | 90336.02  | 69669.09  | 94798.55  | 110628.9  |
| 91665.66  | 101098.2  | 62593.63  | 35253.56  | 69655.56  | 69340.88  | 93715.49  | 60990.35  | 98426.33  | 93990.1   |
| 87200.94  | 95559.96  | 56905.09  | 32724.93  | 59291.84  | 58493.32  | 82222.2   | 66924.37  | 119772.3  | 139837.8  |
| 78180.1   | 81848.16  | 64933.99  | 33815.18  | 76360.62  | 62987.04  | 97319.45  | 55283.64  | 112936.9  | 149845.4  |
| 74083.72  | 102087.8  | 55480.19  | 38347.66  | 49826.01  | 48038.55  | 73438.15  | 68970.35  | 83212.44  | 118340.7  |

|           |           |           |           |           |           |           |           |           |           |
|-----------|-----------|-----------|-----------|-----------|-----------|-----------|-----------|-----------|-----------|
| LN391.000 | LN391.001 | LN391.001 | LN391.134 | LN391.160 | LN391.160 | LN391.160 | LN391.160 | LN391.160 | LN391.160 |
| 102181.9  | 62192.33  | 38767.16  | 13366.97  | 55860.17  | 40936.44  | 47979.67  | 40840.15  | 33806.88  | 59484.01  |
| 103101.5  | 67009.73  | 38629.03  | 14953.69  | 54209.13  | 34411.58  | 49318.02  | 45187.22  | 39202.96  | 60344.85  |
| 102815.9  | 69742.72  | 30199.32  | 14376.7   | 64480.48  | 41109.42  | 45403.95  | 45141     | 38322.95  | 58945.23  |
| 135642    | 99996.32  | 38527.86  | 12691.66  | 60974.48  | 40584.53  | 47408.33  | 46347.98  | 38365.61  | 61316.98  |
| 92693.58  | 58724.22  | 28784.52  | 10282.33  | 27167.63  | 38016.74  | 50528.4   | 46439.92  | 35601.74  | 61509.26  |

|           |           |           |           |           |           |           |           |           |           |
|-----------|-----------|-----------|-----------|-----------|-----------|-----------|-----------|-----------|-----------|
| LN391.160 | LN391.197 |
| 44338.94  | 42697.93  | 49297.74  | 29889.29  | 46804.87  | 28404.57  | 37465.79  | 37846.46  | 62431.13  | 68835.34  |
| 53568.2   | 45670.44  | 44665.32  | 31525.71  | 46789.58  | 29950.33  | 33809.9   | 36977.27  | 58927.55  | 74892.92  |
| 52000.82  | 34843.12  | 43267.71  | 34354.03  | 51471.08  | 32509.16  | 42092.1   | 28336.71  | 74676.56  | 84530.96  |
| 56714.35  | 49791.78  | 50014.81  | 31898.25  | 41246.43  | 31521.02  | 36001     | 34688.32  | 57508.47  | 74292.45  |
| 45886.22  | 42219.56  | 48503.43  | 30230.72  | 42405.5   | 27728.19  | 36706.26  | 38718.45  | 62130.27  | 69644.19  |

|           |           |           |           |           |           |           |           |           |           |
|-----------|-----------|-----------|-----------|-----------|-----------|-----------|-----------|-----------|-----------|
| LN391.197 |
| 49382.36  | 12000.03  | 23038.82  | 36208.11  | 33903.71  | 61727.9   | 46532.53  | 33718.78  | 42942.76  | 55959.91  |
| 46670.43  | 14768.24  | 23094.7   | 36516.29  | 34189.97  | 58082.86  | 46036.55  | 32962.45  | 39906.2   | 56580.74  |
| 47039.82  | 11663.97  | 30521.34  | 28541.58  | 32806.18  | 61580.97  | 48853.05  | 41918     | 35171.99  | 47145.26  |
| 49515.88  | 8247.86   | 22173.37  | 41119.71  | 29789.81  | 56134.19  | 44500.6   | 33620.99  | 42294.93  | 54502.77  |
| 46281.54  | 12668     | 24924.62  | 37273.88  | 28922.94  | 58087.36  | 42378.98  | 37332     | 40293.71  | 58607.89  |

|           |           |           |           |           |           |           |           |           |           |
|-----------|-----------|-----------|-----------|-----------|-----------|-----------|-----------|-----------|-----------|
| LN391.196 | LN391.197 |
| 47436.86  | 54944.89  | 27852.22  | 18297.15  | 27713.93  | 34683.95  | 60786.07  | 58705.28  | 38130.96  | 24518.77  |
| 45900.95  | 58623.73  | 32942.32  | 19899.13  | 27798.95  | 34538.34  | 63483.65  | 60861.12  | 39658.7   | 24723.79  |
| 50938.39  | 58651.5   | 27180.52  | 31506.04  | 22827.73  | 36430.75  | 58836.33  | 74589.83  | 42025.29  | 26074.78  |
| 49846.23  | 53857.63  | 30641.62  | 20388.94  | 23693.76  | 35447.5   | 63502.31  | 59282.86  | 34528.79  | 22582.95  |
| 52550.77  | 53247.22  | 32549.08  | 17978.95  | 25724.98  | 35021.63  | 72756.5   | 59967.13  | 37800.74  | 20606.5   |

|           |           |           |           |           |           |           |           |           |           |           |
|-----------|-----------|-----------|-----------|-----------|-----------|-----------|-----------|-----------|-----------|-----------|
| LN391.197 |
| 55953.54  | 44122.48  | 42950.11  | 31751.11  | 40471.39  | 30081.58  | 26292.33  | 28617.38  | 24240.33  | 27026.18  |           |
| 56804.54  | 42570.75  | 41355.89  | 30624.06  | 42596.73  | 29413.79  | 27510.59  | 27977.09  | 30450.87  | 27224.26  |           |
| 59441.68  | 47264.06  | 44442.53  | 36968.49  | 45639.38  | 26164.01  | 37601.63  | 34997.94  | 21918.55  | 31354.96  |           |
| 61249.68  | 45489.61  | 41245.57  | 32327.25  | 40712.82  | 33135     | 26341.48  | 28482.61  | 26762.62  | 28176.95  |           |
| 54068.07  | 45222.92  | 34597.44  | 32729.11  | 38653.27  | 29304.72  | 23009.86  | 30518.49  | 28125.04  | 30776.43  |           |

|           |           |           |           |           |           |           |           |           |           |
|-----------|-----------|-----------|-----------|-----------|-----------|-----------|-----------|-----------|-----------|
| LN391.197 |
| 48368.39  | 78558.23  | 30630.96  | 41388.19  | 42099.23  | 27857.63  | 28191.45  | 62171.38  | 74648.54  | 24315.21  |
| 50251.3   | 84027.11  | 27231.1   | 44369.01  | 46309.9   | 31383     | 27370.43  | 55845     | 80307.71  | 22469.02  |
| 44697.15  | 82504     | 33899.97  | 42940.36  | 49015.31  | 32460.44  | 27057.02  | 46608.97  | 74339.65  | 23733.07  |
| 46897.25  | 81480.78  | 29296.44  | 42504.83  | 41677.28  | 32527.65  | 24672.01  | 64919.62  | 75020.52  | 25096.29  |
| 47549.94  | 80359.52  | 31465.74  | 47568.18  | 39899.59  | 29044.18  | 28265.3   | 64783.99  | 69397.54  | 22626.45  |



|           |           |           |           |           |           |           |           |           |           |
|-----------|-----------|-----------|-----------|-----------|-----------|-----------|-----------|-----------|-----------|
| LN391.197 |
| 35664.11  | 53716.5   | 39791.72  | 38931.31  | 29466.83  | 54951.08  | 33119.27  | 23925.02  | 70733.88  | 61252.14  |
| 30028.67  | 55666.87  | 33299.05  | 40336.67  | 33174.29  | 62984.71  | 32483.93  | 22510.46  | 76047.72  | 62182.52  |
| 32912.42  | 37713.6   | 40761.01  | 35848.6   | 45226.53  | 73740.64  | 41207.22  | 25415.73  | 76419.46  | 56667.57  |
| 33933.84  | 52622.98  | 34508.96  | 39367.88  | 30050.67  | 55543.51  | 33062.32  | 22681.38  | 74631.86  | 59727.12  |
| 32154.65  | 54962.34  | 37318.19  | 43661.11  | 33419.53  | 50694.41  | 35621.25  | 22890.3   | 65179.04  | 66199.31  |

|           |           |           |           |           |           |           |           |           |           |
|-----------|-----------|-----------|-----------|-----------|-----------|-----------|-----------|-----------|-----------|
| LN391.197 |
| 67330.62  | 40681.52  | 61658.06  | 33122.98  | 52719.07  | 47732.7   | 26182.83  | 31080.47  | 47422.96  | 30124.6   |
| 60897.08  | 41709.43  | 55946.55  | 30700.43  | 55492.96  | 42961.27  | 23022.35  | 35473.56  | 45197.83  | 28837.7   |
| 62539.77  | 38721.66  | 87439.7   | 37189.7   | 53989.35  | 49157.76  | 24752.56  | 31714.82  | 38765.64  | 30216.61  |
| 67748.65  | 40045.06  | 61119.42  | 35866.18  | 54434.92  | 46151.87  | 26402.1   | 37629.46  | 46548.21  | 29079.64  |
| 64552.15  | 34946.71  | 59154.68  | 38054.29  | 51873.04  | 40830.81  | 26213.13  | 37780.19  | 44318.38  | 27719.55  |

|           |           |           |           |           |           |           |           |           |           |
|-----------|-----------|-----------|-----------|-----------|-----------|-----------|-----------|-----------|-----------|
| LN391.197 |
| 32965.4   | 42322.52  | 13561.8   | 19129.46  | 38865.25  | 35950.11  | 15009.86  | 45976.27  | 31243.22  | 14658.33  |
| 33737.73  | 39329.47  | 15424.54  | 19569.17  | 36668.34  | 33851.64  | 20166.82  | 42660.4   | 34342.77  | 15429.07  |
| 30456.51  | 37080.17  | 19816.69  | 17751.67  | 37372.37  | 24418.91  | 13956.71  | 47673.7   | 32803.11  | 18500.29  |
| 31749.89  | 39533.95  | 13856.84  | 20106.76  | 36420.42  | 37766.62  | 15192.07  | 49203.91  | 31783.25  | 16150.54  |
| 30448.77  | 43156.12  | 14040.95  | 19535.02  | 35842.09  | 31619.03  | 14772.36  | 47564.74  | 30840.62  | 14758.64  |

|           |           |           |           |           |           |           |           |           |           |
|-----------|-----------|-----------|-----------|-----------|-----------|-----------|-----------|-----------|-----------|
| LN391.197 | LN391.198 |
| 18426.58  | 44244.52  | 16281.95  | 18815.78  | 39590.68  | 18839.51  | 15286.49  | 21614.7   | 28492.9   | 26451.07  |
| 14618.78  | 42351.56  | 18907.21  | 17295.15  | 38532.78  | 17419.87  | 18243.42  | 22127.18  | 27613.86  | 25187.26  |
| 15520.79  | 52166.01  | 17074.72  | 25968.66  | 46528.28  | 16400.15  | 16315.01  | 22311.42  | 32138.17  | 30534.11  |
| 14355.43  | 42493.85  | 16251.59  | 17182.82  | 37853.58  | 18439.03  | 18724.3   | 20751.17  | 29905.57  | 26948.74  |
| 15456.1   | 39272.53  | 17917.32  | 16375.71  | 41846.89  | 19103.11  | 17671.56  | 20608.91  | 32966.82  | 27858.45  |

|           |           |           |           |           |           |           |           |           |           |
|-----------|-----------|-----------|-----------|-----------|-----------|-----------|-----------|-----------|-----------|
| LN391.208 | LN392.211 | LN393.176 | LN393.277 | LN394.262 | LN394.262 | LN394.262 | LN394.262 | LN394.817 | LN394.890 |
| 190807    | 30170.07  | 32868.51  | 73705.71  | 14806.28  | 18960.83  | 15261.69  | 15331.38  | 52220.81  | 62524.7   |
| 200104.1  | 32102.04  | 26991.32  | 79302.18  | 16343.35  | 20379.79  | 13412.75  | 16175.06  | 40054.65  | 88336.26  |
| 200804    | 32984.6   | 31993.73  | 82812.67  | 14571.59  | 19651.86  | 11675.93  | 14728.8   | 45557.27  | 89572.71  |
| 163704.4  | 25931.15  | 33527.18  | 86426.66  | 13937.89  | 18401.55  | 12842.6   | 15567.55  | 76923.85  | 71405.58  |
| 175029.7  | 28868.67  | 32002.27  | 83546.19  | 16786.09  | 19336.57  | 16985.3   | 15484.67  | 74351.43  | 71983.32  |

|           |           |           |           |           |           |           |           |           |           |
|-----------|-----------|-----------|-----------|-----------|-----------|-----------|-----------|-----------|-----------|
| LN394.890 | LN394.890 | LN394.890 | LN394.890 | LN394.891 | LN395.192 | LN395.192 | LN395.192 | LN395.192 | LN395.192 |
| 108585.5  | 91248.95  | 109603.6  | 170270.1  | 125426.8  | 61736.25  | 59405.97  | 32435.99  | 71994.17  | 10364.82  |
| 116507.8  | 100446.3  | 112587.6  | 195822.2  | 122592.8  | 52121.44  | 61491.84  | 46820.3   | 55916.06  | 14902.68  |
| 125730.6  | 96684.66  | 146248.8  | 158097.8  | 133391.9  | 49497.08  | 64544.75  | 43029.12  | 52407.03  | 12562.86  |
| 111471.5  | 94907.97  | 111113.2  | 168059.3  | 123432.7  | 53123.48  | 64483.06  | 39755.07  | 43370.69  | 11211.89  |
| 114585.1  | 87659.17  | 99884.23  | 161670.5  | 126729.5  | 51542.3   | 61722.12  | 32615.81  | 55389.76  | 14116.3   |

|           |           |           |           |           |           |           |           |           |           |
|-----------|-----------|-----------|-----------|-----------|-----------|-----------|-----------|-----------|-----------|
| LN395.192 |
| 79952.74  | 61672.07  | 85031.87  | 59091.68  | 64846.87  | 27984.36  | 70410     | 66638.88  | 77145.81  | 71559.94  |
| 69612.87  | 52268.42  | 62354.87  | 79348.63  | 106462.8  | 37862.53  | 50346.19  | 60931.97  | 73473.29  | 41337.12  |
| 75396.58  | 49293.97  | 53487.86  | 54120.39  | 91310.25  | 29974.9   | 65354.83  | 52184.7   | 76762.45  | 51699.97  |
| 77358.02  | 54026.96  | 52034.1   | 55748.13  | 85253.54  | 33189.66  | 66763.06  | 52055.54  | 73900.61  | 53948.36  |
| 70423.46  | 47913.12  | 55236.08  | 55668.76  | 91077.54  | 30395.05  | 66443.55  | 54469.29  | 70089.76  | 52089.79  |

|           |           |           |           |           |           |           |           |           |           |
|-----------|-----------|-----------|-----------|-----------|-----------|-----------|-----------|-----------|-----------|
| LN395.192 |
| 29165.93  | 52034.54  | 66759.23  | 73080.95  | 52955.11  | 53010.26  | 39590.91  | 32874.41  | 31016.38  | 45374.41  |
| 39342.84  | 59752.91  | 73584.4   | 74952.28  | 40063.64  | 59866.99  | 45301.99  | 25695.49  | 32250.68  | 46403.08  |
| 27951.53  | 54787.89  | 63407.54  | 90318.24  | 45001.87  | 47356.04  | 45188.11  | 30047.26  | 30222.36  | 35999.22  |
| 28973.87  | 57342.06  | 55578.71  | 87636.77  | 45087.24  | 48660.28  | 46568.54  | 28079.27  | 28040.9   | 39629.86  |
| 28441.61  | 53193.16  | 63811.14  | 85597.25  | 47554.13  | 45849.09  | 46644.26  | 27964.44  | 28708.79  | 37535.79  |



|           |           |           |           |           |           |           |           |           |           |
|-----------|-----------|-----------|-----------|-----------|-----------|-----------|-----------|-----------|-----------|
| LN395.192 |
| 52919.8   | 31855.13  | 32713.21  | 31527.86  | 43023.91  | 26574.76  | 28168.19  | 71462.7   | 50192.66  | 29003.18  |
| 55075.79  | 45047.4   | 46908.39  | 28406.37  | 54397.53  | 33841.93  | 24613.62  | 59126.97  | 43055.77  | 34600.44  |
| 54133.24  | 28066.98  | 45884.05  | 31036.44  | 49839.37  | 27861.42  | 26748.41  | 71407.71  | 55087.91  | 32906.76  |
| 56668.33  | 27320.16  | 48328.37  | 26990.75  | 49566.31  | 31857.92  | 24553.58  | 74903.53  | 51270.4   | 32289.97  |
| 49934     | 28736.74  | 39981.4   | 30374.44  | 49679.38  | 30747.39  | 23208.52  | 71403.32  | 56207.24  | 31608.42  |

|           |           |           |           |           |           |           |           |           |           |
|-----------|-----------|-----------|-----------|-----------|-----------|-----------|-----------|-----------|-----------|
| LN395.192 | LN395.192 | LN395.192 | LN395.192 | LN395.192 | LN395.192 | LN395.193 | LN395.192 | LN395.192 | LN395.192 |
| 36065.72  | 20077.16  | 31263.69  | 21218.36  | 52248.56  | 52699.83  | 34896.72  | 30979.26  | 40708.82  | 39447.46  |
| 47589.27  | 24708.84  | 29757.33  | 18403.36  | 51816.5   | 39783.81  | 46116.41  | 37202.97  | 36388.56  | 26066.02  |
| 40998.73  | 22162.86  | 33230     | 17116.68  | 51064.58  | 37851.57  | 34706.27  | 39811.71  | 44679.02  | 26719.86  |
| 40478.99  | 23732.61  | 30529.96  | 17476.94  | 51252.69  | 34691.52  | 32618.75  | 40632.69  | 42954.68  | 28573.05  |
| 43177.36  | 24230.69  | 34391.74  | 18720.54  | 49116.37  | 37831.11  | 34535.12  | 44023.03  | 41317.37  | 26756.06  |

|           |           |           |           |           |           |           |           |           |           |
|-----------|-----------|-----------|-----------|-----------|-----------|-----------|-----------|-----------|-----------|
| LN395.192 |
| 30842.82  | 29279.44  | 44792.26  | 33761.77  | 50466.99  | 21189.78  | 17014.42  | 44216.95  | 15954.46  | 28115.04  |
| 35962.84  | 26358.36  | 36462.81  | 36068.75  | 52643.27  | 18957.91  | 18965.2   | 31212.86  | 22086.38  | 24912.32  |
| 34928.41  | 26803.78  | 44175.96  | 33360.45  | 28722.32  | 18928.44  | 19460     | 37985.53  | 15157.16  | 27858.34  |
| 34300.54  | 26672.1   | 45541.72  | 33403.24  | 34426.36  | 22699.22  | 20425.96  | 37300.14  | 14765.43  | 32920.38  |
| 33824.48  | 29113.42  | 36341.49  | 36641.19  | 29362.61  | 17502.99  | 18688.79  | 34510.29  | 15200.56  | 32408.87  |

|           |           |           |           |           |           |           |           |           |           |
|-----------|-----------|-----------|-----------|-----------|-----------|-----------|-----------|-----------|-----------|
| LN395.192 |
| 45067.62  | 55598.44  | 48557.68  | 46555.91  | 63545.17  | 32469.26  | 46350.07  | 28054.46  | 36326.96  | 47157.25  |
| 55235.66  | 59850.46  | 66179.63  | 75391.81  | 64069.07  | 32201.34  | 52846.44  | 31450.86  | 69600.1   | 44699.22  |
| 43820.4   | 44809.71  | 44037.94  | 52330.97  | 50522.72  | 20087.81  | 52795.29  | 28220.43  | 33937.93  | 41840.25  |
| 43798.61  | 42350.25  | 45913.08  | 54524.78  | 50614.08  | 17875.35  | 54024.51  | 32579.01  | 38763.1   | 45899.42  |
| 42754.04  | 46530.1   | 46218.39  | 47137.4   | 50760.47  | 19810.09  | 50179.73  | 28999.1   | 36746.66  | 46313.59  |

|           |           |           |           |           |           |           |           |           |           |
|-----------|-----------|-----------|-----------|-----------|-----------|-----------|-----------|-----------|-----------|
| LN395.192 |
| 30241.34  | 21574.53  | 20602.79  | 60129.77  | 45022.64  | 18209.55  | 35218.44  | 38002.01  | 39436.91  | 31246.18  |
| 31016.84  | 17873.15  | 17133.53  | 55316.4   | 37130.26  | 21802.99  | 67979.4   | 23857.27  | 33797.88  | 35821.95  |
| 28054.61  | 19068.47  | 20034.85  | 52715.74  | 39150.44  | 20110.71  | 44039.39  | 24587.63  | 32554.16  | 38939.04  |
| 29903.54  | 20242.33  | 20226.67  | 57106.05  | 36034.47  | 21406.26  | 45289.74  | 21947.51  | 31036.89  | 38398.02  |
| 31162.02  | 21426.45  | 18901.83  | 57944.27  | 40492.11  | 18775.61  | 46054.07  | 22285.94  | 36447.44  | 38560.62  |

|           |           |           |           |           |           |           |           |           |           |
|-----------|-----------|-----------|-----------|-----------|-----------|-----------|-----------|-----------|-----------|
| LN395.192 | LN395.193 |
| 29769.11  | 27908.71  | 34645.63  | 16718.68  | 32002.61  | 17042.39  | 42927.8   | 48314.15  | 24264.59  | 26646.46  |
| 23610.64  | 27589.01  | 43050     | 10859.44  | 33220.8   | 17394.39  | 42619.72  | 49586.26  | 26020.18  | 28012.96  |
| 26220.68  | 29187.05  | 37354.25  | 16942.11  | 32794.72  | 16855.21  | 41985.73  | 64657.07  | 27352.99  | 27811.95  |
| 27856.7   | 29801.36  | 36582.14  | 20852.66  | 34444.38  | 17347.36  | 40259.67  | 67350.84  | 28537.17  | 27624.41  |
| 26610.9   | 26888.82  | 35452.52  | 18515.29  | 33157.7   | 17082.45  | 41547.23  | 62470.53  | 28218.12  | 26880.24  |

|           |           |           |           |           |           |           |           |           |           |
|-----------|-----------|-----------|-----------|-----------|-----------|-----------|-----------|-----------|-----------|
| LN395.193 | LN395.193 | LN395.193 | LN395.193 | LN395.192 | LN395.192 | LN395.193 | LN395.275 | LN396.815 | LN396.991 |
| 26567.39  | 35188.04  | 41617.02  | 46939.81  | 43395.91  | 52369.92  | 42961.59  | 24281.07  | 24671.28  | 16857.83  |
| 23865.98  | 35292.56  | 44442.37  | 41556.48  | 41419.18  | 51469.02  | 45351.41  | 24876.15  | 21276.38  | 16817.3   |
| 25933.76  | 36464.46  | 45338.09  | 50001.56  | 43429.31  | 55612.71  | 46199.12  | 23307.43  | 26602.85  | 17907.39  |
| 22874.26  | 38119.54  | 43975.34  | 39983.43  | 40944.52  | 54941.36  | 43452.99  | 28737.26  | 17396.16  | 15918.34  |
| 27881.1   | 38051.02  | 42005.58  | 44416.17  | 40741.69  | 51597.47  | 42580.66  | 23399.11  | 21651.28  | 17303.73  |

|           |           |           |           |           |           |           |           |           |           |
|-----------|-----------|-----------|-----------|-----------|-----------|-----------|-----------|-----------|-----------|
| LN396.991 |
| 14460.91  | 40346.1   | 30295.24  | 27916.09  | 32924.34  | 25303.3   | 32485.79  | 27945.01  | 36393.33  | 41557.35  |
| 14940.33  | 41781.49  | 30010.55  | 24497.11  | 27767.96  | 26086.13  | 30970.86  | 28579.57  | 39407.75  | 36352.54  |
| 13483.7   | 41035.32  | 29113.71  | 25887.72  | 28443.93  | 26383.76  | 32574.09  | 28437.35  | 45122.84  | 39462.49  |
| 14886.3   | 38985.58  | 30224.41  | 26152.59  | 29216.52  | 23185.86  | 32305.98  | 26284.62  | 43893.44  | 39107.44  |
| 15095.17  | 40365.45  | 31120.33  | 26174.19  | 29684.09  | 26514.64  | 29925.1   | 30274.68  | 39408.84  | 34675.38  |



|           |           |           |           |           |           |           |           |           |           |
|-----------|-----------|-----------|-----------|-----------|-----------|-----------|-----------|-----------|-----------|
| LN396.991 |
| 47552.14  | 19552.67  | 21866.14  | 38051.82  | 31011.08  | 15568.3   | 27293.29  | 35760.78  | 30520.86  | 25880.09  |
| 46684.57  | 21023.58  | 22115.53  | 37643.26  | 32030.04  | 15492.76  | 28353.71  | 37985.17  | 33098.06  | 22805.48  |
| 51014.56  | 20633.02  | 21106.46  | 32229     | 35010.88  | 15167.08  | 28694.85  | 33904.42  | 33321.67  | 23868.04  |
| 51801.64  | 18593.32  | 23180.61  | 35483.09  | 33500.75  | 15105.33  | 26249.9   | 34553.17  | 33111.78  | 25335.4   |
| 49831.07  | 19984.92  | 21631.49  | 36275.57  | 30324.45  | 14334.11  | 26105.39  | 34332.09  | 33942.41  | 24554.96  |

|           |           |           |           |           |           |           |           |           |           |
|-----------|-----------|-----------|-----------|-----------|-----------|-----------|-----------|-----------|-----------|
| LN396.991 |
| 26524.88  | 23904.64  | 27485.73  | 24853.9   | 33671.15  | 50370.59  | 30460.73  | 29047.53  | 19195.67  | 19487.69  |
| 22693.09  | 26693.89  | 23161.45  | 21901.89  | 35687.74  | 53564.95  | 32744.81  | 28582.59  | 17264.09  | 20101.89  |
| 26316.59  | 25674.06  | 25229.23  | 24701.28  | 36260.59  | 51516.67  | 30909.58  | 25948.2   | 18091.01  | 21038.95  |
| 25569.6   | 27642.4   | 25947.66  | 22692.02  | 36917.99  | 51354.31  | 29804.89  | 27784.84  | 18307.71  | 20449.24  |
| 27427.07  | 26627.99  | 23581.51  | 22450.86  | 36079.62  | 51657.92  | 29959.09  | 25670.02  | 16236.63  | 20915.9   |

|           |           |           |           |           |           |           |           |           |           |
|-----------|-----------|-----------|-----------|-----------|-----------|-----------|-----------|-----------|-----------|
| LN396.991 | LN396.990 |
| 31407.1   | 28748.02  | 26423.23  | 26846.98  | 40260.51  | 34969.31  | 42101.5   | 12787.53  | 26580.87  | 28013.02  |
| 33140.17  | 26648.45  | 23433.03  | 25559.92  | 41495.83  | 32807.75  | 41309.51  | 13046.27  | 26229.31  | 24937.86  |
| 32359.54  | 26221.19  | 24597.99  | 26804.29  | 43923.77  | 34043.25  | 42733.93  | 12089.82  | 25251.31  | 26579.75  |
| 30223.01  | 26598.03  | 26148.96  | 26037.16  | 39063.21  | 31233.11  | 42659.04  | 11848.02  | 24968.36  | 25802.28  |
| 33344.54  | 26694.89  | 26282.06  | 27876.52  | 42457.62  | 33831.72  | 43049.57  | 13065.87  | 24081.24  | 26419.11  |

|           |           |           |           |           |           |           |           |           |           |
|-----------|-----------|-----------|-----------|-----------|-----------|-----------|-----------|-----------|-----------|
| LN396.990 | LN396.991 |
| 47280.43  | 39421.7   | 19197.51  | 54304.84  | 18417.09  | 24788.53  | 19428.63  | 22799.92  | 20999.87  | 26896.33  |
| 45524.57  | 36737.33  | 21135.49  | 55140.78  | 18399.16  | 22387.24  | 18726.01  | 26464.74  | 22048.52  | 30640.42  |
| 43864.07  | 41220.09  | 18400.75  | 50938.94  | 17949.11  | 24149.42  | 20594.9   | 27988.64  | 22746.47  | 27744.62  |
| 46540.4   | 35384.1   | 18482.25  | 53840.02  | 17945.81  | 22429.43  | 19131.91  | 23610.79  | 20880.78  | 28364.83  |
| 46847     | 34851.77  | 20921.26  | 56592.8   | 16640.03  | 21305.72  | 20664.45  | 24047.32  | 22751.2   | 26865.27  |

|           |           |           |           |           |           |           |           |           |           |
|-----------|-----------|-----------|-----------|-----------|-----------|-----------|-----------|-----------|-----------|
| LN396.991 | LN396.992 |
| 25783.67  | 36346.11  | 22689.6   | 37092.13  | 35875.23  | 56234.84  | 32661.56  | 29428.02  | 21214.16  | 16093.64  |
| 25362.05  | 42433.55  | 20852.32  | 35092.49  | 32407.59  | 51603.83  | 34349.04  | 29694.97  | 20902.24  | 17508.81  |
| 23750.71  | 36596.66  | 20906.34  | 37359.56  | 34381.77  | 53815.1   | 30876.68  | 25803.13  | 18924.22  | 16059.93  |
| 25962.48  | 37081.77  | 22410.64  | 39014.51  | 34273.04  | 54212.04  | 32411.2   | 25256.05  | 20570.33  | 16673.72  |
| 25136.44  | 37899.97  | 21382.66  | 35877.65  | 33916.57  | 49678.03  | 33410.11  | 27157.59  | 18526.33  | 13762.25  |

|           |           |           |           |           |           |           |           |           |           |
|-----------|-----------|-----------|-----------|-----------|-----------|-----------|-----------|-----------|-----------|
| LN396.991 |
| 17577.57  | 48077.74  | 20677.44  | 13453.85  | 14740.45  | 23500.15  | 39126.78  | 35425.26  | 21666.78  | 25922.48  |
| 17150.27  | 47492.94  | 21584.83  | 12320.69  | 14086.47  | 24639.18  | 41302.61  | 31719.21  | 20927.32  | 25036.38  |
| 18108.89  | 43573.53  | 21193.48  | 13664.74  | 14931.36  | 24994.75  | 38386.49  | 31455.62  | 21316.04  | 26799.16  |
| 18414.2   | 44721.68  | 21272.78  | 11369.74  | 13594.33  | 26976     | 43020.37  | 32991.67  | 20928.46  | 24179.63  |
| 16964.24  | 46156.94  | 23372.85  | 11199.3   | 16561.16  | 25392.35  | 38366.42  | 30930.98  | 20180.46  | 25663.79  |

|           |           |           |           |           |           |           |           |           |           |
|-----------|-----------|-----------|-----------|-----------|-----------|-----------|-----------|-----------|-----------|
| LN396.991 |
| 29150.27  | 25863.33  | 38566.97  | 32770.81  | 22500.86  | 30968.01  | 20242.73  | 41567.35  | 34584.58  | 92031.25  |
| 31319.79  | 22502.07  | 36197.78  | 32516.66  | 21797.34  | 32078.15  | 19924.84  | 42571.37  | 35250.76  | 89800.78  |
| 32971.94  | 27235.99  | 29928.74  | 32825.2   | 21596.83  | 31164.43  | 17532.95  | 39769.98  | 36868.37  | 86100.41  |
| 34024.6   | 26724.03  | 34812.86  | 32651.9   | 20874.53  | 32110.15  | 21378.47  | 40633.14  | 34921.08  | 90834.94  |
| 29751.39  | 24152.54  | 34017.84  | 30526.1   | 20141.96  | 29623.99  | 20223.35  | 41021.94  | 34104.24  | 86961.25  |

|           |           |           |           |           |           |           |           |           |           |
|-----------|-----------|-----------|-----------|-----------|-----------|-----------|-----------|-----------|-----------|
| LN396.991 | LN396.991 | LN396.991 | LN396.992 | LN396.991 | LN396.991 | LN396.991 | LN397.244 | LN398.833 | LN401.004 |
| 44506.56  | 55868.42  | 39376.89  | 14835.51  | 35200.52  | 39041.72  | 38836.76  | 56035.46  | 20411.17  | 37369.31  |
| 47697.64  | 60090.86  | 37973.83  | 15471.04  | 36118.62  | 39554.36  | 36428.1   | 54354.58  | 20692.03  | 21095.06  |
| 42776.39  | 58521.58  | 38875.76  | 14289.69  | 34147.8   | 41762.39  | 39600.13  | 55607.61  | 21961.6   | 33110.71  |
| 46712.78  | 56449.35  | 39077.77  | 13363.15  | 35890.74  | 35528.24  | 40266.74  | 41005.42  | 19563.47  | 28065.72  |
| 45587.24  | 51185.05  | 38111.57  | 13070.01  | 35296.44  | 39051.5   | 34577.09  | 49710.81  | 21708.95  | 24683.88  |



|           |           |           |           |           |           |           |           |           |           |
|-----------|-----------|-----------|-----------|-----------|-----------|-----------|-----------|-----------|-----------|
| LN401.003 | LN401.004 |
| 43067.36  | 11403.27  | 27963.24  | 40205.19  | 44851.19  | 34147.62  | 68345.85  | 71035.45  | 42645.31  | 22773.79  |
| 33684.56  | 13725.4   | 32126.66  | 53333.35  | 41489.88  | 50096.67  | 49464.34  | 45226.63  | 65042.18  | 30567.52  |
| 44213.58  | 14306.12  | 30836.52  | 29003.95  | 34395.35  | 42851.65  | 58461.9   | 34240.2   | 46231.92  | 29527.14  |
| 57825.67  | 12071.16  | 34402.24  | 52025.52  | 40166.35  | 42372.8   | 62540.83  | 39222.71  | 48285.37  | 33877.23  |
| 38731.26  | 15150.38  | 30472.47  | 43291.84  | 34284.87  | 37190.78  | 50183.99  | 36194.26  | 46588.71  | 25950.64  |

|           |           |           |           |           |           |           |           |           |           |
|-----------|-----------|-----------|-----------|-----------|-----------|-----------|-----------|-----------|-----------|
| LN401.004 |
| 45123.01  | 42468.98  | 48318.6   | 29469.31  | 14031.61  | 75609.23  | 54261.52  | 43813.18  | 40380.17  | 20164.94  |
| 30352.37  | 40555.13  | 45213.09  | 31016.98  | 20181.84  | 56706.74  | 57015.67  | 26880.7   | 46913.22  | 26932.92  |
| 44198.99  | 54280.25  | 96448.06  | 33303.49  | 14428.45  | 52954     | 44340.79  | 32010.64  | 50579.27  | 29118.45  |
| 35249.22  | 51831     | 55505.41  | 44670.24  | 23311.6   | 40447.45  | 48775.43  | 28289.86  | 37948.1   | 19760.5   |
| 40592.74  | 40666.67  | 47615.17  | 40316.03  | 22296.41  | 47471.29  | 53562.56  | 34389.4   | 43981.12  | 22366.24  |

|           |           |           |           |           |           |           |           |           |           |
|-----------|-----------|-----------|-----------|-----------|-----------|-----------|-----------|-----------|-----------|
| LN401.004 |
| 38001.25  | 54371.63  | 37188.87  | 28444.17  | 45098.09  | 45968.95  | 46284.95  | 90230.35  | 31669.53  | 40686.19  |
| 26740.27  | 54472.66  | 38344.26  | 35839.14  | 42627.81  | 48149.57  | 40426.21  | 73494.79  | 55897.8   | 34516.14  |
| 19845.45  | 44982.99  | 44165.05  | 39013.8   | 40527.99  | 56295.67  | 64340.6   | 72142.23  | 53937.15  | 28097.28  |
| 19202.17  | 75372.57  | 37409.11  | 34551.45  | 39315.93  | 38791.16  | 58149.06  | 68106.02  | 49356.8   | 39296.94  |
| 23473.1   | 43296.81  | 41534.76  | 34424.99  | 34777.74  | 37262.63  | 46046.71  | 61372.82  | 44314.75  | 37957.01  |

|           |           |           |           |           |           |           |           |           |           |
|-----------|-----------|-----------|-----------|-----------|-----------|-----------|-----------|-----------|-----------|
| LN401.004 |
| 18912.77  | 52940.72  | 73632.59  | 28816.58  | 42653.2   | 27993.89  | 28594.94  | 26541.83  | 36223.54  | 58006.07  |
| 21148.44  | 40255.73  | 70107.78  | 29275.21  | 48175.48  | 23579.5   | 31145.06  | 32183.51  | 57049.97  | 52769.81  |
| 18151.43  | 51534.78  | 66883.18  | 29126.84  | 44335.98  | 22427.29  | 21908.78  | 32316.38  | 43478.6   | 77660.26  |
| 22210.45  | 44139.3   | 82893.51  | 38879.94  | 40106.33  | 37099.65  | 33766.23  | 33020.19  | 42937.38  | 50445.54  |
| 21225.49  | 46753.56  | 64778.22  | 35517.69  | 34615.28  | 25451.26  | 28520.61  | 31391.56  | 38887.26  | 57253.07  |

|           |           |           |           |           |           |           |           |           |           |
|-----------|-----------|-----------|-----------|-----------|-----------|-----------|-----------|-----------|-----------|
| LN401.004 |
| 14974.41  | 58443.19  | 30623.36  | 38483.71  | 65067.29  | 66656.95  | 58297.75  | 13303.95  | 33087.84  | 32346.44  |
| 13015.53  | 86289.93  | 35017.44  | 56852.47  | 51630.08  | 84876.02  | 53015.74  | 17822.97  | 40564.78  | 33089.09  |
| 23102.61  | 111334.6  | 33453.64  | 52753.83  | 64206.37  | 62611.43  | 41708.66  | 16063.28  | 31066.18  | 38126.07  |
| 20410.33  | 43353.59  | 32821.73  | 46571.42  | 57535.16  | 72494.54  | 50675.24  | 16535.75  | 34401.12  | 33871.23  |
| 21222.96  | 56604.91  | 31110.46  | 45464.42  | 71474.97  | 64626.31  | 48734.94  | 17278.1   | 36241.17  | 34882.26  |

|           |           |           |           |           |           |           |           |           |           |
|-----------|-----------|-----------|-----------|-----------|-----------|-----------|-----------|-----------|-----------|
| LN401.004 |
| 50517.45  | 51114.72  | 23780.41  | 56477.02  | 39462.18  | 18317.76  | 38142.82  | 28308.81  | 10232.26  | 36722.32  |
| 60788.92  | 45878.08  | 24794.33  | 31536.12  | 44896.03  | 24791.79  | 47960.23  | 31033.31  | 16525.78  | 52899.71  |
| 60453.86  | 62114.38  | 38469.4   | 25943.96  | 56157.29  | 23768.33  | 49840.9   | 42459.04  | 19791.11  | 42882.35  |
| 51220.78  | 41013.5   | 29042.1   | 45160.96  | 52593.21  | 22284.82  | 50559.94  | 29228.2   | 13599.95  | 52364.07  |
| 46085.19  | 44878.09  | 26063.63  | 34644.17  | 49391.84  | 27096.81  | 44101.95  | 26877.61  | 13567.37  | 41797.6   |

|           |           |           |           |           |           |           |           |           |           |
|-----------|-----------|-----------|-----------|-----------|-----------|-----------|-----------|-----------|-----------|
| LN401.004 |
| 26615.19  | 33153.49  | 56424.1   | 20514.58  | 23923.58  | 15065.87  | 37114.31  | 35161.95  | 75641.3   | 46547.76  |
| 38063.97  | 36507.98  | 56836.42  | 24044.89  | 34777.76  | 19309.96  | 31496.23  | 26861.8   | 72122.07  | 59061.61  |
| 30912.13  | 31805.24  | 55579.94  | 25604.41  | 24429.28  | 12918.95  | 25346.72  | 24163.65  | 63710.55  | 36751.96  |
| 30541.02  | 38446.55  | 58199.99  | 16071.16  | 22573.57  | 14554.55  | 26475.7   | 23093.43  | 52682.25  | 36220.04  |
| 32406.33  | 25742.41  | 63943.2   | 19179.69  | 28353.48  | 18446.93  | 32232.31  | 24479.68  | 46680.73  | 34880.22  |

|           |           |           |           |           |           |           |           |           |           |
|-----------|-----------|-----------|-----------|-----------|-----------|-----------|-----------|-----------|-----------|
| LN401.004 |
| 17015.53  | 20468.66  | 43754.97  | 50904.58  | 42271.5   | 22906.81  | 16894.7   | 44832.94  | 33966.03  | 34721.8   |
| 14217.55  | 28656.61  | 32150.64  | 42713.09  | 55310.72  | 26517.38  | 17017.36  | 65337.33  | 35173.51  | 25012.31  |
| 13624.11  | 42750.97  | 45686.03  | 56985.78  | 46324.04  | 20290.34  | 16488.11  | 44337.07  | 46934.19  | 29571.4   |
| 11722.33  | 23544     | 38773.01  | 49859.5   | 45592.14  | 33514.15  | 18621.04  | 46393.99  | 34272.82  | 26201.16  |
| 17286.01  | 35776.94  | 35398.32  | 42534.04  | 47816     | 24310.19  | 16138.15  | 44109.97  | 39264.67  | 32943.59  |



|           |           |           |           |           |           |           |           |           |           |
|-----------|-----------|-----------|-----------|-----------|-----------|-----------|-----------|-----------|-----------|
| LN401.004 | LN401.004 | LN401.004 | LN401.163 | LN402.166 | LN402.850 | LN402.984 | LN403.000 | LN403.000 | LN403.000 |
| 34278.43  | 52321.31  | 45742.55  | 82188.98  | 14039.31  | 63591.37  | 18097.96  | 35376.59  | 50752.34  | 59840.98  |
| 31658.22  | 31869.67  | 47579.34  | 77408.36  | 15192.5   | 78509.79  | 16691.93  | 41595.65  | 69892.97  | 53104.89  |
| 29624.1   | 45776.55  | 48380.91  | 86486.9   | 16750.51  | 68592.22  | 17071.09  | 38845.06  | 67676.18  | 50853.05  |
| 28407.14  | 42105.95  | 34489.31  | 73322.76  | 13538.39  | 90771.12  | 18800.28  | 35860.4   | 68983.81  | 47596.39  |
| 36865.4   | 40546.41  | 52993.34  | 72727.76  | 14783.79  | 92663.52  | 16038.67  | 38184.77  | 70526.23  | 50513.01  |

|           |           |           |           |           |           |           |           |           |           |
|-----------|-----------|-----------|-----------|-----------|-----------|-----------|-----------|-----------|-----------|
| LN403.001 | LN403.000 |
| 38460.54  | 18621.92  | 41917.23  | 39377.73  | 39114.57  | 25714.97  | 14251.61  | 63324.61  | 49273.23  | 57734.85  |
| 30786.49  | 14652.05  | 37150.95  | 51409.32  | 36632.12  | 29849.39  | 17960.67  | 50961.31  | 47496.1   | 57322.09  |
| 28540.2   | 13917.95  | 34724.92  | 49151.04  | 34760.6   | 31376.12  | 16118.27  | 52627.25  | 51774.89  | 61898.12  |
| 27689.65  | 15402.93  | 35334.22  | 49185.23  | 34650.82  | 32677.32  | 15515.14  | 46463.27  | 48683.29  | 57296.06  |
| 30731.7   | 15538.3   | 31330.73  | 51510.27  | 34808.23  | 32164.41  | 16257.97  | 42337.61  | 45001.41  | 59148.5   |

|           |           |           |           |           |           |           |           |           |           |
|-----------|-----------|-----------|-----------|-----------|-----------|-----------|-----------|-----------|-----------|
| LN403.001 | LN403.001 | LN403.001 | LN403.001 | LN403.001 | LN403.000 | LN403.001 | LN403.001 | LN403.000 | LN403.001 |
| 50209.44  | 37029.96  | 39996.15  | 21429.67  | 67027.22  | 51635.43  | 14557.75  | 36824.86  | 71010.66  | 28352.05  |
| 52601.9   | 26465.89  | 38742.35  | 16685.25  | 50975.45  | 69164.81  | 15638.61  | 33992.03  | 61958.86  | 26612.64  |
| 51108     | 28645.01  | 40198.71  | 15655     | 50492.95  | 67789.89  | 17965.83  | 32102.13  | 58004.47  | 28375.24  |
| 46314.3   | 27219.31  | 41758.1   | 16553.78  | 47021.64  | 71242.62  | 16098.3   | 35339     | 65431.44  | 32062.99  |
| 47448.61  | 27845.88  | 42851.26  | 16552.1   | 46785.05  | 73316.28  | 15067.5   | 30879.49  | 59297.45  | 29272.8   |

|           |           |           |           |           |           |           |           |           |           |
|-----------|-----------|-----------|-----------|-----------|-----------|-----------|-----------|-----------|-----------|
| LN403.001 | LN403.001 | LN403.001 | LN403.000 | LN403.001 | LN403.000 | LN403.001 | LN403.001 | LN403.001 | LN403.001 |
| 39216.23  | 16664.62  | 32710.1   | 44854.68  | 30640.67  | 50764.93  | 44804.64  | 52642     | 29132.95  | 32102.92  |
| 24928.12  | 14781.54  | 26461.35  | 37743.18  | 34428.73  | 50209.15  | 37206.69  | 50465.92  | 18693.04  | 49963.39  |
| 26053.08  | 14964.44  | 23126.46  | 44906.84  | 34739.09  | 55753.4   | 44746.35  | 52673.11  | 21409.55  | 46115.37  |
| 25237.48  | 17561.03  | 24712.88  | 45769.42  | 30851.72  | 52162.31  | 43448.9   | 49564.12  | 16070.9   | 47432.99  |
| 28139.5   | 15577.97  | 24847.36  | 42550.82  | 32559.19  | 49029.94  | 38660.48  | 50164.58  | 17151.09  | 47032.94  |

|           |           |           |           |           |           |           |           |           |           |
|-----------|-----------|-----------|-----------|-----------|-----------|-----------|-----------|-----------|-----------|
| LN403.001 |
| 60542.08  | 55188.22  | 57865.52  | 22053.34  | 34807.31  | 53370.61  | 29699.39  | 35312.65  | 45096.3   | 36609.94  |
| 50490.55  | 47786.36  | 41295.14  | 24938.82  | 31820.29  | 42091.44  | 36610.63  | 33594.7   | 38434.04  | 30045.76  |
| 53469.32  | 46390.01  | 41317.52  | 24108.62  | 28283.48  | 42527.93  | 34999.9   | 31705.11  | 33541.87  | 32328.34  |
| 51076.82  | 44119.42  | 41205.16  | 24036.09  | 32627.06  | 39402.88  | 34600.08  | 32452.15  | 37631.67  | 36365.08  |
| 46705.74  | 45208.59  | 39066.37  | 22852.15  | 28351.42  | 44230.68  | 33713.46  | 34054.59  | 36314.93  | 33053.71  |

|           |           |           |           |           |           |           |           |           |           |
|-----------|-----------|-----------|-----------|-----------|-----------|-----------|-----------|-----------|-----------|
| LN403.001 | LN403.000 | LN403.001 |
| 22152.01  | 26186.53  | 17379.21  | 54533.59  | 52543.05  | 21463.43  | 35362.32  | 34813.39  | 59018.57  | 31418.86  |
| 16272.72  | 20780.97  | 20740.99  | 41459.45  | 34510.87  | 34947.91  | 59624.22  | 31556.09  | 54884.25  | 23726.31  |
| 14395.56  | 21339.37  | 20777.68  | 45611.94  | 36374.17  | 32209.08  | 53285.19  | 32946.16  | 56158.43  | 25430.02  |
| 14698.58  | 23832.47  | 20795.36  | 45428.17  | 35762.41  | 33083.68  | 66614.26  | 31653.63  | 49953.52  | 26074.7   |
| 10583.63  | 24990.22  | 21739.96  | 47588.11  | 36955.51  | 33599.63  | 58319.03  | 31400.86  | 54976.54  | 27147.94  |

|           |           |           |           |           |           |           |           |           |           |
|-----------|-----------|-----------|-----------|-----------|-----------|-----------|-----------|-----------|-----------|
| LN403.001 |
| 40117.16  | 42031.54  | 31988.18  | 22685.23  | 35107.45  | 47393.6   | 30635.81  | 52802.71  | 39681.31  | 26694.23  |
| 41580.44  | 41050.63  | 18816.54  | 24047.63  | 29931.9   | 35090.3   | 37717.8   | 47087.4   | 39946.64  | 23403.49  |
| 42238.56  | 36421.01  | 19297.71  | 22751.5   | 36122.34  | 35016.14  | 38030.93  | 52949.07  | 38438.88  | 25297.04  |
| 45175.99  | 34969.7   | 18479.27  | 25122.91  | 31555.55  | 42904.07  | 35591.08  | 44194.54  | 42660.08  | 25380.8   |
| 38853.12  | 35813.31  | 19430.29  | 22584.91  | 31979.42  | 36954.49  | 36361.69  | 50674.1   | 36603.19  | 23236.21  |

|           |           |           |           |           |           |           |           |           |           |
|-----------|-----------|-----------|-----------|-----------|-----------|-----------|-----------|-----------|-----------|
| LN403.001 |
| 38492.81  | 47631.12  | 31582.85  | 36625.96  | 28808.41  | 33962.13  | 32980.05  | 24209.67  | 35660     | 19058.69  |
| 44059.15  | 36792.09  | 34133.13  | 40132.81  | 24595.77  | 34790.37  | 30188.76  | 26481.84  | 34577.6   | 17685.62  |
| 47208.61  | 38263.04  | 34686.78  | 45300.06  | 22987.72  | 29593.12  | 33142.48  | 28265.17  | 30602.19  | 17673.15  |
| 47052.56  | 33999.48  | 29524.02  | 47574.44  | 23857.2   | 33664.03  | 33528.77  | 27257.19  | 33539.62  | 16118.74  |
| 52914.92  | 35785.67  | 31892.81  | 47420.09  | 26708.36  | 30968.73  | 32212.98  | 26033.04  | 34323.89  | 17356.11  |



|           |           |           |           |           |           |           |           |           |           |
|-----------|-----------|-----------|-----------|-----------|-----------|-----------|-----------|-----------|-----------|
| LN403.001 | LN403.001 | LN403.001 | LN403.000 | LN403.001 | LN403.001 | LN403.000 | LN403.001 | LN403.001 | LN403.001 |
| 20836.25  | 39134.16  | 42262.07  | 65615.73  | 19970.58  | 58861.62  | 64354.35  | 30618.16  | 41830.01  | 23690.86  |
| 18963.57  | 38972.87  | 37687.05  | 65644.67  | 26501.98  | 45854.57  | 54235.02  | 31264.06  | 38291     | 26766.51  |
| 18588.88  | 39592.02  | 38517.87  | 64667.81  | 25841.26  | 43092.55  | 60940.26  | 30642.84  | 39167     | 25662.74  |
| 16960.49  | 39815.76  | 36276.37  | 59308.79  | 25416.21  | 45565.83  | 58260.41  | 31173.65  | 38489.19  | 24391.93  |
| 16470.78  | 36014.31  | 42690.04  | 63340.37  | 25345.31  | 41635.37  | 62725.32  | 30021.09  | 38023.15  | 26395.04  |

|           |           |           |           |           |           |           |           |           |           |
|-----------|-----------|-----------|-----------|-----------|-----------|-----------|-----------|-----------|-----------|
| LN403.001 | LN403.163 | LN403.306 | LN403.305 | LN403.461 | LN403.848 | LN404.845 | LN404.999 | LN404.999 | LN404.999 |
| 29923.72  | 48977.5   | 92230.66  | 35187.36  | 16963.99  | 51902.5   | 763685.6  | 44065.32  | 23540.14  | 73143.7   |
| 27197.88  | 42721.66  | 106155.2  | 34993.02  | 16037.2   | 55377.33  | 717371.4  | 45840.66  | 22305.4   | 70395.89  |
| 29714     | 49861     | 130478    | 37040.95  | 15704.49  | 59973.67  | 740536.9  | 46055.04  | 23220.18  | 62828.4   |
| 29418.38  | 42412.15  | 121695.6  | 34483.64  | 12625.53  | 60766.78  | 912390.9  | 44945.64  | 20721.73  | 65904.12  |
| 27366.7   | 47852.85  | 145862.9  | 38861.67  | 11685.63  | 66118.43  | 889311.5  | 40816.84  | 21954.39  | 68784.96  |

|           |           |           |           |           |           |           |           |           |           |
|-----------|-----------|-----------|-----------|-----------|-----------|-----------|-----------|-----------|-----------|
| LN404.999 | LN404.999 | LN404.999 | LN404.999 | LN404.999 | LN405_5.8 | LN404.999 | LN404.998 | LN404.999 | LN404.999 |
| 30178.41  | 74035.86  | 18100.44  | 46782.13  | 45555.99  | 38748.32  | 42547.36  | 57969.43  | 20275.11  | 20546.81  |
| 30157.19  | 72981.92  | 18586.96  | 46305.53  | 45168.67  | 35893.23  | 39790.7   | 60478.08  | 18971.85  | 18785.62  |
| 32076.58  | 69385.72  | 18431.98  | 41880.34  | 46798.87  | 35835.05  | 42781.56  | 60696.98  | 21482.44  | 17476.23  |
| 30501.06  | 70563.93  | 17152.52  | 38168.77  | 47325.98  | 38664.49  | 41269.23  | 63499.8   | 21560.75  | 18205.86  |
| 27577     | 70789.17  | 15356.92  | 41679.02  | 41787.78  | 34585.06  | 39587.83  | 58294.81  | 19834.15  | 17098.2   |

|           |           |           |           |           |           |           |           |           |           |
|-----------|-----------|-----------|-----------|-----------|-----------|-----------|-----------|-----------|-----------|
| LN404.999 | LN404.998 | LN404.999 |
| 47808.8   | 49698.23  | 56330.81  | 29464.58  | 43881.23  | 79681.37  | 39033.51  | 73335.46  | 43488.01  | 64249.82  |
| 51262.65  | 53861.74  | 60913.97  | 27670.31  | 40244.01  | 79162.98  | 43543.93  | 74588.58  | 42785.9   | 61315     |
| 47315.61  | 53456.22  | 58056.2   | 29848.53  | 42383.18  | 74138.1   | 40387.74  | 75014.25  | 41119.1   | 62793.93  |
| 48767.2   | 53009.47  | 59263.55  | 32562.44  | 44912.37  | 73515.62  | 37644.42  | 71259.86  | 37092.96  | 64218.91  |
| 45021.2   | 47147.99  | 54802.57  | 27080.55  | 38938.6   | 69846.92  | 41015.52  | 70081.48  | 44307.31  | 54473.53  |

|           |           |           |           |           |           |           |           |           |           |
|-----------|-----------|-----------|-----------|-----------|-----------|-----------|-----------|-----------|-----------|
| LN404.999 | LN404.999 | LN404.998 | LN404.999 | LN404.999 | LN404.999 | LN404.999 | LN404.998 | LN404.998 | LN404.999 |
| 84133.83  | 67925.82  | 63061.72  | 72309.77  | 57615.21  | 34737.12  | 24777.99  | 58392.72  | 103241.1  | 52397.74  |
| 87917.27  | 77175.03  | 65377.01  | 65487.01  | 57999.28  | 39972.44  | 21797.31  | 53268.7   | 102350.7  | 56368.85  |
| 82693.08  | 70467.02  | 62673.3   | 69319.09  | 60206.81  | 36119.23  | 24490.46  | 59470     | 103764.2  | 54332.05  |
| 87408.21  | 74087.3   | 61967.67  | 60871.59  | 53019.5   | 38241.32  | 22455.42  | 57557.73  | 103606.9  | 55315.86  |
| 85858.23  | 70284.48  | 61209.71  | 69319.24  | 54598.28  | 34080.86  | 21450.89  | 51850.84  | 100064.7  | 54098.78  |

|           |           |           |           |           |           |           |           |           |           |
|-----------|-----------|-----------|-----------|-----------|-----------|-----------|-----------|-----------|-----------|
| LN404.999 | LN405.000 | LN404.999 |
| 25122.25  | 34824.85  | 54767.56  | 49826.2   | 38282.04  | 29424.31  | 29483.58  | 26114.85  | 43452.99  | 38474.78  |
| 25757.78  | 38780.48  | 52224.95  | 44902.1   | 32472.14  | 29793.19  | 27954.2   | 32072.08  | 35013.81  | 40484.96  |
| 22333.65  | 35506.6   | 47792.14  | 47416.73  | 37698.12  | 27932.22  | 28736.86  | 30971.3   | 38383.45  | 38756.35  |
| 23112.57  | 33361.67  | 48392.91  | 44913.33  | 34381.72  | 29827.8   | 30470.86  | 28639.83  | 39706.54  | 38247.68  |
| 21685.76  | 36962.46  | 50994.4   | 45866.28  | 33217.14  | 32237.74  | 30022.36  | 31382.7   | 38059.66  | 39135.76  |

|           |           |           |           |           |           |           |           |           |           |
|-----------|-----------|-----------|-----------|-----------|-----------|-----------|-----------|-----------|-----------|
| LN404.999 | LN404.999 | LN404.999 | LN404.999 | LN405.000 | LN404.999 | LN404.999 | LN404.999 | LN404.999 | LN404.999 |
| 42693.24  | 54006.02  | 46063.31  | 28686.33  | 44198.99  | 74911.22  | 66778.06  | 52551.52  | 51343.67  | 28119.17  |
| 39411.01  | 56049.74  | 43889.64  | 23674.25  | 44039.42  | 76798.21  | 67914.56  | 51273.55  | 49229.11  | 30520.07  |
| 40926.01  | 53495.42  | 43832.84  | 29695.72  | 46518.35  | 76965.17  | 63106.73  | 51044.77  | 53059.26  | 28321.22  |
| 42515.61  | 54999.04  | 47732.71  | 28815.23  | 45096.75  | 69749.27  | 60593.07  | 54658.22  | 45354.61  | 29848.65  |
| 40869.85  | 52154.08  | 42161.32  | 29563.75  | 47172.36  | 72844.96  | 62328.88  | 49133.55  | 46607.78  | 29568.9   |

|           |           |           |           |           |           |           |           |           |           |
|-----------|-----------|-----------|-----------|-----------|-----------|-----------|-----------|-----------|-----------|
| LN404.999 | LN404.999 | LN404.999 | LN404.999 | LN404.999 | LN404.999 | LN404.998 | LN404.999 | LN404.999 | LN404.999 |
| 46863.81  | 22881.68  | 32316.28  | 40635.87  | 39460.03  | 67326.09  | 78328.45  | 94024.86  | 29365.59  | 72564.63  |
| 42616.42  | 30660.78  | 32485.77  | 49253.83  | 44017.04  | 59792.52  | 84160.97  | 97164.57  | 30618.13  | 65406.77  |
| 41579.73  | 25392.38  | 27745.62  | 41877.89  | 42677.79  | 70205.05  | 87746.52  | 88528.74  | 24082.13  | 67209.38  |
| 40593.99  | 28246.73  | 27930.7   | 40789.97  | 40880.28  | 66584.26  | 91484.59  | 93285.91  | 27469.94  | 66558.18  |
| 43670.62  | 27510.7   | 28141.88  | 44379.44  | 36663.37  | 62408.27  | 88658.34  | 91849.67  | 28742.38  | 64635.78  |



|           |           |           |           |           |           |           |           |           |           |
|-----------|-----------|-----------|-----------|-----------|-----------|-----------|-----------|-----------|-----------|
| LN404.998 | LN404.999 | LN404.999 | LN404.999 | LN404.998 | LN405_7.8 | LN404.999 | LN404.999 | LN405_3.8 | LN404.999 |
| 68869.1   | 41869.46  | 25120.63  | 41234.39  | 78478.22  | 41909.91  | 91091.71  | 36213.2   | 32795.54  | 63354.71  |
| 74276.39  | 40402.55  | 24590.5   | 43914.71  | 72218.03  | 41876.2   | 93281.49  | 37782.32  | 28742.83  | 62726.65  |
| 76132.94  | 38737.57  | 25471.78  | 39346.8   | 74642.31  | 43956.37  | 90998.69  | 38199.97  | 29145.23  | 70907.47  |
| 82569.7   | 39608.15  | 24993.27  | 42782.34  | 77659.64  | 39068.93  | 90419.01  | 34894.63  | 31128.46  | 57865.8   |
| 66159.72  | 40161.58  | 25777.39  | 44227.67  | 76746.12  | 38182.01  | 91579.01  | 40005.45  | 31353.39  | 63718.69  |

|           |           |           |           |           |           |           |           |           |           |
|-----------|-----------|-----------|-----------|-----------|-----------|-----------|-----------|-----------|-----------|
| LN404.999 | LN404.999 | LN404.998 | LN404.999 | LN405.000 | LN404.999 | LN404.999 | LN405_2.4 | LN404.998 | LN404.999 |
| 66736.13  | 47940.11  | 78602.07  | 52900.73  | 55856.72  | 37193.96  | 54355.36  | 27550.52  | 82803.09  | 69744.03  |
| 63069.09  | 38318.5   | 72746.07  | 53730.67  | 50110.8   | 36171.28  | 53470.54  | 26693.72  | 81051.93  | 67468.33  |
| 60700.53  | 37934.46  | 80151.7   | 56514.31  | 56257.83  | 44800.06  | 50103.41  | 29687.32  | 79190.9   | 70672.58  |
| 58272.85  | 45296.14  | 83045.93  | 56833.71  | 49528.72  | 38504.3   | 55065.5   | 29387.12  | 77249.66  | 64596.77  |
| 60058.5   | 40894.69  | 73497.45  | 55686.56  | 53971.85  | 34760.69  | 52117     | 23076.93  | 77890.67  | 68209.53  |

|           |           |           |           |           |           |           |           |           |           |
|-----------|-----------|-----------|-----------|-----------|-----------|-----------|-----------|-----------|-----------|
| LN405.015 | LN405.016 |
| 59922.12  | 55766.72  | 41154.85  | 25340.14  | 48579.87  | 31862.53  | 43570.8   | 41705.57  | 53292.19  | 86528.38  |
| 87544.24  | 39366.22  | 40249.01  | 12464.69  | 50424.84  | 52275.84  | 87582.41  | 64929.2   | 67368.55  | 102879.4  |
| 91326.83  | 61190.32  | 39290.37  | 14841.72  | 71205.89  | 37867.36  | 31292.69  | 58940.59  | 48989.53  | 70568.88  |
| 59635.76  | 72647.22  | 44865.17  | 13561.21  | 57403.36  | 32589.07  | 58401.05  | 48412.91  | 55507.31  | 85909.43  |
| 75350.91  | 58534.55  | 44720.34  | 15793.68  | 53835.45  | 42184.99  | 41587.68  | 49174.76  | 55659.98  | 71843.86  |

|           |           |           |           |           |           |           |           |           |           |
|-----------|-----------|-----------|-----------|-----------|-----------|-----------|-----------|-----------|-----------|
| LN405.016 |
| 42634.05  | 83876.05  | 37727.88  | 67607.32  | 49180.55  | 106832.3  | 58932.77  | 48654.97  | 58985.43  | 54225.44  |
| 34533.77  | 64591.44  | 41780.62  | 63166.66  | 41112.44  | 82465.88  | 61746.29  | 35492.2   | 54002.93  | 47082.58  |
| 50289.48  | 72992.63  | 38597.98  | 87346.38  | 42005.1   | 103699.4  | 60874.29  | 60208.96  | 68166.93  | 69959.67  |
| 46326.77  | 81817.24  | 43427.69  | 54990.94  | 40117.05  | 102414.5  | 54442.27  | 47450.94  | 94643.41  | 63910.11  |
| 30337.18  | 76011.16  | 34975.43  | 86458.49  | 44463.79  | 104622.6  | 59559.75  | 55964.27  | 70555.25  | 57096.98  |

|           |           |           |           |           |           |           |           |           |           |
|-----------|-----------|-----------|-----------|-----------|-----------|-----------|-----------|-----------|-----------|
| LN405.016 | LN405.016 | LN405.017 | LN405.016 |
| 88276.69  | 74830.16  | 30982.7   | 63858.3   | 45756.69  | 121791.8  | 43653.23  | 28218.1   | 47732.9   | 43551.85  |
| 82863.21  | 60173.06  | 16388.36  | 75977.88  | 37137.6   | 86415.32  | 39625.07  | 32793.24  | 47123.04  | 49058.53  |
| 105998.1  | 68586.94  | 23433.61  | 79777.47  | 51437.03  | 121132.9  | 32950.29  | 29096.48  | 51843.2   | 62279.98  |
| 78593.76  | 59429.15  | 30303.6   | 83200.95  | 34529.84  | 67772.8   | 52475.24  | 37661.2   | 44602.87  | 42036.94  |
| 65720     | 57271.13  | 21015.03  | 67423.09  | 46866.41  | 77087.53  | 43646.94  | 30278.29  | 43373.15  | 45253.05  |

|           |           |           |           |           |           |           |           |           |           |
|-----------|-----------|-----------|-----------|-----------|-----------|-----------|-----------|-----------|-----------|
| LN405.016 |
| 61877.41  | 51368.93  | 33162.72  | 44431.11  | 37656.79  | 45161.13  | 43239.68  | 35972.43  | 68996.41  | 63421.16  |
| 61790.03  | 69022.65  | 32426.84  | 55454.33  | 47497.88  | 74074.11  | 40069.8   | 34129.78  | 56668.13  | 51580.62  |
| 51657.17  | 62593.8   | 33994.03  | 46162.9   | 49442.94  | 49153.26  | 36053.27  | 38830.8   | 64960.15  | 61778.04  |
| 74988.58  | 68446.65  | 29606.23  | 29772.97  | 52942.97  | 60504.17  | 39366.65  | 27736.96  | 63832.51  | 93170.56  |
| 52234.76  | 60465.9   | 32629.42  | 46209.86  | 46353.6   | 48591.84  | 41426.84  | 27804.45  | 70357.01  | 68473.26  |

|           |           |           |           |           |           |           |           |           |           |
|-----------|-----------|-----------|-----------|-----------|-----------|-----------|-----------|-----------|-----------|
| LN405.016 | LN405.016 | LN405.017 | LN405.016 | LN405.016 | LN405.016 | LN405.016 | LN405.016 | LN405.016 | LN405.017 |
| 86028.71  | 73289.72  | 22276.81  | 29746.77  | 34465.31  | 63104.42  | 52443.68  | 46910.53  | 78447.4   | 30108.5   |
| 128610.9  | 64310.91  | 15092.07  | 19537.63  | 49339.82  | 36183.32  | 40948.69  | 71886.86  | 65905.53  | 14134.69  |
| 112511.2  | 68040.34  | 24220.03  | 17746.42  | 40473.31  | 64504.75  | 50513.6   | 64898.56  | 70524.89  | 15468.72  |
| 81376.47  | 91216.75  | 16082.84  | 20358.62  | 39324.09  | 40436.75  | 47459.16  | 65551.53  | 73366.07  | 15447.86  |
| 92754.92  | 57418.16  | 17174.36  | 25052.6   | 42770.25  | 45066.16  | 45407.08  | 49620.28  | 61184.26  | 18832.95  |

|           |           |           |           |           |           |           |           |           |           |
|-----------|-----------|-----------|-----------|-----------|-----------|-----------|-----------|-----------|-----------|
| LN405.017 | LN405.016 |
| 24065.77  | 36048.53  | 30605.7   | 75429.09  | 37690.34  | 49095.06  | 66192.2   | 76641.24  | 23695.22  | 86607.48  |
| 26495.75  | 47383.88  | 43405.7   | 84508.76  | 34713.27  | 51069.65  | 49217.49  | 63869.47  | 25244.19  | 91621.83  |
| 25592.41  | 41691.95  | 40746.44  | 51022.28  | 48702.29  | 37087.54  | 48680.8   | 90266.72  | 28551.59  | 73555.5   |
| 26024.8   | 53692.56  | 40977.23  | 57729.09  | 37938.23  | 54132.77  | 57977.77  | 77533.94  | 31681.65  | 93580.89  |
| 20158.29  | 42184.84  | 36264.01  | 57855.4   | 37345.13  | 50893.3   | 52382.26  | 74171.63  | 24228.4   | 81465.36  |



|           |           |           |           |           |           |           |           |           |           |
|-----------|-----------|-----------|-----------|-----------|-----------|-----------|-----------|-----------|-----------|
| LN405.016 | LN405.016 | LN405.016 | LN405.016 | LN405.016 | LN405.017 | LN405.016 | LN405.016 | LN405.017 | LN405.016 |
| 21015.55  | 64837.78  | 29559.91  | 88076.21  | 47927.98  | 19648.53  | 44485.54  | 33426.68  | 16688.4   | 43371.87  |
| 30653.48  | 98057.49  | 56631.7   | 62211.74  | 53965.68  | 13999.9   | 65662.15  | 30155.28  | 19894.47  | 55994.64  |
| 29978.64  | 61400.12  | 59157.52  | 59999.44  | 51770.73  | 18354.42  | 76816.9   | 36236.11  | 20807.2   | 51608.02  |
| 22926.77  | 67289.86  | 35954.74  | 80657.46  | 74333.95  | 27456.14  | 94200     | 34794.3   | 15321.05  | 36961.73  |
| 22218.13  | 66272.89  | 48466.19  | 68074.01  | 60711.26  | 21470.81  | 66396.78  | 31860.84  | 15880.35  | 45120.15  |

|           |           |           |           |           |           |           |           |           |           |
|-----------|-----------|-----------|-----------|-----------|-----------|-----------|-----------|-----------|-----------|
| LN405.016 | LN405.017 |
| 41558.64  | 40716.98  | 82414.89  | 21014.88  | 50582.96  | 67348.5   | 72374.91  | 42239.91  | 109117.4  | 23123.5   |
| 49920.7   | 61531.79  | 69806.69  | 15019.34  | 60579.78  | 138240.1  | 41432.42  | 50405.27  | 83068.66  | 20670.16  |
| 42278.86  | 44800.18  | 112627    | 16486.3   | 57233.04  | 70167.4   | 51783.97  | 41588.34  | 87976.51  | 21290.61  |
| 45264.36  | 54922.38  | 72504.98  | 19334.6   | 53458.95  | 77372.23  | 52923.88  | 43790.88  | 92706.08  | 24692.94  |
| 51986.23  | 53567.99  | 69754.1   | 15698.65  | 52620.9   | 99353.84  | 57048.41  | 46385.87  | 83734.45  | 24766.98  |

|           |           |           |           |           |           |           |           |           |           |
|-----------|-----------|-----------|-----------|-----------|-----------|-----------|-----------|-----------|-----------|
| LN405.016 | LN405.016 | LN405.016 | LN405.016 | LN405.159 | LN405.176 | LN405.175 | LN405.175 | LN405.175 | LN405.175 |
| 33798.28  | 49890.47  | 56108.15  | 30361.47  | 15553.48  | 25616.13  | 23601.93  | 30925.24  | 28617.41  | 25706.73  |
| 46396.85  | 53786.55  | 69235.47  | 33610.89  | 14390.92  | 28325.67  | 21362.38  | 30902.5   | 26478.27  | 28597.02  |
| 42317.26  | 52708.5   | 56040.3   | 33984.72  | 13934.11  | 26202.16  | 20321.54  | 36661.52  | 26982.27  | 29220.77  |
| 39491.23  | 53823.5   | 54939.5   | 36677.67  | 15420.8   | 26121.8   | 19716.15  | 33180.05  | 30380.13  | 32767.3   |
| 43019.51  | 54079.76  | 55338.56  | 32493.35  | 12783.21  | 28986.82  | 19767.91  | 32181.6   | 27096.2   | 29229.98  |

|           |           |           |           |           |           |           |           |           |           |
|-----------|-----------|-----------|-----------|-----------|-----------|-----------|-----------|-----------|-----------|
| LN405.175 | LN405.848 | LN406.793 | LN406.846 | LN406.994 | LN406.995 | LN406.994 | LN406.995 | LN406.995 | LN406.995 |
| 32475.11  | 70062.23  | 170465.9  | 189004.5  | 34087.87  | 21373.65  | 39629.8   | 36121.78  | 27530.21  | 28921.68  |
| 34708.78  | 61792.47  | 152824.6  | 199209.4  | 39173.59  | 23694.88  | 36102.19  | 38360.96  | 30908.27  | 30691.71  |
| 34311.54  | 84332.36  | 159625.4  | 265891.5  | 34263.31  | 20437.06  | 34184.68  | 35663.66  | 24814.05  | 27535.81  |
| 35039.76  | 72875.64  | 173711.9  | 381538    | 33657.12  | 18077.92  | 37093.51  | 39700.74  | 25869.08  | 27860.98  |
| 33463.54  | 86424.33  | 200199.1  | 373035.2  | 31096.52  | 19110.35  | 35442.01  | 34646.4   | 29283.66  | 27745.78  |

|           |           |           |           |           |           |           |           |           |           |
|-----------|-----------|-----------|-----------|-----------|-----------|-----------|-----------|-----------|-----------|
| LN406.995 | LN406.994 | LN406.995 | LN406.994 | LN406.994 | LN406.995 | LN406.995 | LN406.995 | LN406.994 | LN406.995 |
| 18451.23  | 48131.42  | 22296.69  | 32971.54  | 24912.97  | 40150.42  | 16012.74  | 38292.67  | 27981.49  | 13482.86  |
| 20451.81  | 46886.53  | 22984.61  | 35366.24  | 25571.99  | 42053.24  | 17609.86  | 35986.37  | 29645.88  | 13495.21  |
| 19570.85  | 43007.56  | 20994.16  | 29148.32  | 23794.94  | 40986.41  | 15344.94  | 34605.83  | 30340.99  | 11213.82  |
| 20161.9   | 44888.97  | 22913.82  | 32598.11  | 24679.68  | 44276.16  | 14065.41  | 29548.23  | 26522.02  | 11573.71  |
| 20402.33  | 42209.05  | 21238.72  | 35769.08  | 24938.13  | 40899.19  | 18212.32  | 31495.23  | 27386.8   | 11310.52  |

|           |           |           |           |           |           |           |           |           |           |
|-----------|-----------|-----------|-----------|-----------|-----------|-----------|-----------|-----------|-----------|
| LN406.995 | LN406.994 | LN406.994 | LN406.995 | LN406.995 | LN406.995 | LN406.995 | LN406.994 | LN406.995 | LN406.995 |
| 16855.16  | 31822     | 35957.13  | 23675.59  | 25693.04  | 35795.03  | 24200.19  | 50817.88  | 33298.96  | 29997.75  |
| 14389.21  | 34911.99  | 47247.47  | 25235.44  | 27019.42  | 40228.55  | 29062.17  | 53338.03  | 34853.37  | 30391.08  |
| 12316.93  | 29893.08  | 36084.94  | 23476.66  | 25361.19  | 36190.71  | 26307.96  | 47955.01  | 32457.22  | 28192.9   |
| 12906.62  | 31394.8   | 40191.12  | 23669.84  | 24555.74  | 36830.38  | 23904.14  | 46323.96  | 31144.05  | 27542.42  |
| 13854.75  | 29537.7   | 34935.8   | 19947.66  | 24912.23  | 36352.48  | 22619.19  | 49666.29  | 30290.71  | 27135.34  |

|           |           |           |           |           |           |           |           |           |           |
|-----------|-----------|-----------|-----------|-----------|-----------|-----------|-----------|-----------|-----------|
| LN406.995 | LN406.995 | LN406.995 | LN406.995 | LN406.995 | LN406.995 | LN406.994 | LN406.995 | LN406.994 | LN406.995 |
| 27627.08  | 28058.69  | 17307.68  | 46033.91  | 36422.39  | 27517.82  | 30952.18  | 31842.25  | 34759.59  | 32478.87  |
| 33341.1   | 29532.51  | 20717.76  | 46938.84  | 38813.86  | 28570.82  | 29712.52  | 32787.23  | 36440.32  | 32500.29  |
| 27624.93  | 29505.32  | 18882.16  | 46371.54  | 35404.8   | 31215.6   | 30588.41  | 36848.19  | 37744.16  | 36583.77  |
| 27568.45  | 28944.37  | 19438.78  | 47116.35  | 34589.2   | 30696.23  | 27141.18  | 29974.45  | 31385.53  | 30406.12  |
| 29286.96  | 29110.21  | 17285.26  | 44425.28  | 37971.07  | 28702.61  | 26474.82  | 31195.84  | 34830.46  | 32595.53  |

|           |           |           |           |           |           |           |           |           |           |
|-----------|-----------|-----------|-----------|-----------|-----------|-----------|-----------|-----------|-----------|
| LN406.995 | LN406.995 | LN406.994 | LN406.994 | LN406.994 | LN406.995 | LN406.995 | LN406.995 | LN406.995 | LN406.995 |
| 17874.48  | 29785.87  | 47974.73  | 45275.55  | 54947.61  | 23518.86  | 26059.73  | 37578.48  | 20431.48  | 27198.25  |
| 20854.05  | 31632.54  | 50042.82  | 56103.55  | 57839.26  | 27964.01  | 29152.42  | 39660.93  | 21472.59  | 28303.95  |
| 17081.94  | 25513.14  | 52439.37  | 52188.86  | 58905.31  | 25790.95  | 26737.27  | 38863     | 18010.83  | 24273.82  |
| 16373.35  | 28416.08  | 46013.71  | 52119.24  | 60052.27  | 28011.25  | 24862.67  | 39053.3   | 18290.09  | 24191.79  |
| 18585.13  | 27988.12  | 50934.58  | 50781.77  | 57026.19  | 24530.79  | 25279.68  | 39668.58  | 22590.76  | 28172.84  |



|           |           |           |           |           |           |           |           |           |           |
|-----------|-----------|-----------|-----------|-----------|-----------|-----------|-----------|-----------|-----------|
| LN406.995 | LN406.994 | LN406.995 | LN406.995 | LN406.994 | LN406.995 | LN406.995 | LN406.994 | LN406.995 | LN406.995 |
| 30432.27  | 35425.52  | 22047.95  | 23561.97  | 34164.28  | 22522.57  | 17927.52  | 33847.47  | 28549.68  | 33399.95  |
| 30643.58  | 39814.44  | 19493.74  | 27489.95  | 36571.32  | 23985.57  | 19839.15  | 34390.7   | 27262.43  | 36795.23  |
| 31776.46  | 36278.53  | 21481.08  | 28599.16  | 36562.16  | 23197.02  | 18030.49  | 31709.47  | 26393.82  | 36906.51  |
| 29615.62  | 37389.43  | 19157.23  | 25671.79  | 35155.15  | 21998.09  | 20135.69  | 31275.82  | 28101.55  | 31148.19  |
| 30237.66  | 35969.01  | 21967.43  | 25737.86  | 32712.9   | 21065.02  | 17582.21  | 30424.31  | 24803.48  | 31999.29  |

|           |           |           |           |           |           |           |           |           |           |
|-----------|-----------|-----------|-----------|-----------|-----------|-----------|-----------|-----------|-----------|
| LN406.994 | LN406.995 | LN406.994 | LN406.995 |
| 31012.38  | 27743.66  | 24932.93  | 26212.03  | 24515.85  | 26859.08  | 33657.67  | 41540.67  | 28713.08  | 28381.68  |
| 36266.45  | 29036.57  | 28989.52  | 26214.8   | 23432.46  | 26867.78  | 39192.36  | 42767.39  | 30046.61  | 26935.36  |
| 33278.53  | 27669.36  | 25404.6   | 26869.53  | 21787.73  | 26102.33  | 33079.13  | 36809.52  | 27538.68  | 27850.83  |
| 33025.5   | 24994.61  | 24477.77  | 27036.15  | 23918.94  | 26968.97  | 31582.99  | 41836.92  | 25616.97  | 29899.47  |
| 28044.43  | 27778.41  | 26303.11  | 25691.67  | 18253.97  | 28018.37  | 33745.53  | 37708.28  | 27821.32  | 29067.33  |

|           |           |           |           |           |           |           |           |           |           |
|-----------|-----------|-----------|-----------|-----------|-----------|-----------|-----------|-----------|-----------|
| LN406.995 | LN406.995 | LN406.995 | LN406.995 | LN406.994 | LN406.995 | LN406.995 | LN406.994 | LN406.995 | LN406.994 |
| 24470.51  | 30278.42  | 28313.85  | 19655.71  | 42299.06  | 29700.78  | 14894.28  | 46599.65  | 28330.92  | 37520.68  |
| 29510.88  | 29185.89  | 30083.85  | 20020.38  | 45725.23  | 30731.19  | 12439.89  | 54173.47  | 29372.51  | 42894.77  |
| 28163.26  | 25928.56  | 29616.76  | 18929.78  | 45178.64  | 29931.86  | 11863.23  | 47201.69  | 30396.49  | 40117.84  |
| 24320.03  | 27172.52  | 29644.3   | 18983.39  | 40755.6   | 31027.7   | 13870.77  | 48503.56  | 27904.54  | 37343.29  |
| 26625.07  | 30497.91  | 30162.64  | 19060.04  | 45434.64  | 27297.49  | 12849.8   | 47565.09  | 31518.23  | 34419.46  |

|           |           |           |           |           |           |           |           |           |           |           |
|-----------|-----------|-----------|-----------|-----------|-----------|-----------|-----------|-----------|-----------|-----------|
| LN406.995 | LN406.995 | LN406.994 | LN406.995 | LN406.995 | LN406.995 | LN406.995 | LN407.192 | LN407.192 | LN407.192 | LN407.192 |
| 21124.39  | 16251.92  | 63078.1   | 23140.47  | 14579.56  | 30097.28  | 70621.43  | 78817.19  | 13452.21  | 96280.68  |           |
| 17733.12  | 18136.94  | 64528.23  | 22398.47  | 17300.84  | 32009.95  | 101501.4  | 84102.46  | 18932.84  | 81182.69  |           |
| 18665.7   | 19195.38  | 61203.86  | 21700.33  | 15368.59  | 29013.68  | 70510.74  | 68541.1   | 13877.37  | 85168.71  |           |
| 20204.72  | 15665.52  | 59495.43  | 21542.6   | 14229.59  | 28931.81  | 66879.41  | 78572.89  | 13372.02  | 95613.62  |           |
| 21604.76  | 15422.51  | 64879.66  | 19426.59  | 16715.77  | 28636.72  | 73851.31  | 76172.9   | 15991.48  | 83487.98  |           |

|           |           |           |           |           |           |           |           |           |           |
|-----------|-----------|-----------|-----------|-----------|-----------|-----------|-----------|-----------|-----------|
| LN407.192 | LN407.192 | LN407.192 | LN407.192 | LN407.192 | LN407.191 | LN407.192 | LN407.192 | LN407.192 | LN407.192 |
| 61531.56  | 81251.62  | 82352.56  | 103617.3  | 117587.3  | 51566.72  | 59719.08  | 72682.87  | 46293.89  | 66100.23  |
| 86289.39  | 88838.71  | 94400.41  | 59091.48  | 65009.93  | 51326.9   | 58800.61  | 40824.63  | 60018.65  | 51623.45  |
| 88374.91  | 92018.43  | 77934.73  | 90200.99  | 76993.1   | 49339.27  | 70693.42  | 54343.64  | 59688.89  | 67761.62  |
| 92146.49  | 99960.75  | 77596.13  | 95889.72  | 74453.43  | 52822.66  | 70675.47  | 60236.42  | 65115.74  | 74386.67  |
| 85493.45  | 101353.7  | 76283.2   | 88816.69  | 78962.39  | 48484.44  | 70885.28  | 58601.97  | 65785.53  | 68982.43  |

|           |           |           |           |           |           |           |           |           |           |
|-----------|-----------|-----------|-----------|-----------|-----------|-----------|-----------|-----------|-----------|
| LN407.192 |
| 42362.22  | 56710.81  | 43138.41  | 59272.27  | 70898.48  | 45219.82  | 44200.42  | 28857.62  | 18777.58  | 92395.04  |
| 49698.07  | 55817.54  | 48037.12  | 110318.4  | 78178.37  | 37166.34  | 36529.81  | 41596.4   | 25417.58  | 75981.32  |
| 49899.26  | 60260.13  | 46478.04  | 67691.61  | 62949.74  | 48413.67  | 39766.4   | 35352.39  | 25163     | 68020.08  |
| 50181.53  | 55934.66  | 43214.52  | 60146.15  | 62076.22  | 52397.21  | 40055.27  | 36117.13  | 24209.98  | 60856.06  |
| 50870.2   | 56410.28  | 46793.56  | 62069.14  | 61651.9   | 52755.47  | 44949.09  | 36902.33  | 25786.33  | 68187.55  |

|           |           |           |           |           |           |           |           |           |           |
|-----------|-----------|-----------|-----------|-----------|-----------|-----------|-----------|-----------|-----------|
| LN407.192 |
| 90812.75  | 25284.19  | 36156.13  | 70283.37  | 33984.74  | 64265.45  | 36400.97  | 47002.01  | 17027.27  | 31136.66  |
| 77077.24  | 24532.32  | 35509.32  | 52950.88  | 37871.16  | 65018.24  | 32041.97  | 26678.03  | 16858.52  | 19398.7   |
| 82786.05  | 24388.61  | 36173     | 60381.69  | 38994.31  | 60658.32  | 33131.29  | 37650.81  | 15972.44  | 27607.7   |
| 81679.14  | 28488.84  | 36046.05  | 46386.6   | 38186.67  | 60745.6   | 37788.77  | 38637.59  | 17927.1   | 24549.62  |
| 71157.7   | 24681.85  | 31321.24  | 60726.98  | 38363.33  | 58024.1   | 37730.75  | 40262.16  | 16197.76  | 28421.26  |

|           |           |           |           |           |           |           |           |           |           |
|-----------|-----------|-----------|-----------|-----------|-----------|-----------|-----------|-----------|-----------|
| LN407.192 |
| 76079.17  | 57703.94  | 54438.52  | 74559.17  | 26586.6   | 52147.12  | 52341.53  | 69460.92  | 90657.64  | 36987.98  |
| 78719.41  | 49380.51  | 35890.05  | 73245.65  | 22359.18  | 43912.56  | 43986.26  | 50946.06  | 68234.23  | 36421.65  |
| 67147.31  | 57444.54  | 46724.22  | 66905.24  | 20859.68  | 41632.69  | 42129.23  | 40205.83  | 57555.25  | 43308.73  |
| 57800.73  | 52729.65  | 50366.35  | 68481.76  | 19821.45  | 38513.93  | 45590.38  | 44597.83  | 56013.99  | 44365.12  |
| 60694.5   | 49847.1   | 44641.69  | 70912.95  | 24078.91  | 36518.5   | 42839.76  | 45982.34  | 63200.58  | 43136.28  |



|           |           |           |           |           |           |           |           |           |           |
|-----------|-----------|-----------|-----------|-----------|-----------|-----------|-----------|-----------|-----------|
| LN407.192 |
| 61292.03  | 34783.17  | 50777.51  | 39841.64  | 60182.16  | 60442.12  | 26209.7   | 53822.02  | 24492.63  | 46064.5   |
| 40811.54  | 38713.1   | 61417.31  | 55053.71  | 54940.15  | 56000.4   | 18124.04  | 33608.28  | 39179.99  | 53384.02  |
| 39673.32  | 39042.61  | 60599.79  | 41491     | 53479.92  | 57043.19  | 20725.2   | 41096.51  | 29476.61  | 38686.55  |
| 35727.38  | 38814.51  | 61006.98  | 44686.72  | 54759.12  | 59904.59  | 23395.47  | 43674.03  | 24308.47  | 39807.43  |
| 41501.72  | 39764.24  | 61067.84  | 40783.66  | 54135.16  | 59925.73  | 21944.71  | 45701.92  | 27613.62  | 38908.78  |

|           |           |           |           |           |           |           |           |           |           |
|-----------|-----------|-----------|-----------|-----------|-----------|-----------|-----------|-----------|-----------|
| LN407.192 |
| 48667.55  | 32725.72  | 40160.31  | 32915.17  | 62739.79  | 70224.66  | 46060.53  | 35296.72  | 54732.28  | 39640.25  |
| 63971.79  | 65519.34  | 47734.17  | 32259.87  | 44514.45  | 46592.26  | 55676.3   | 53576.87  | 71598.54  | 42890.06  |
| 55606.44  | 38257.65  | 42665.9   | 35245.49  | 51105.91  | 39100.24  | 52280.9   | 37555.47  | 58072.63  | 41817.23  |
| 54129.09  | 34668.03  | 44253.07  | 34716.38  | 55820.93  | 40234.9   | 52087.74  | 34919.18  | 65068.24  | 45771.72  |
| 52900.39  | 30636.71  | 44175.73  | 39042.89  | 52374.28  | 39043.29  | 53923.19  | 39540.93  | 57539.63  | 39390.79  |

|           |           |           |           |           |           |           |           |           |           |
|-----------|-----------|-----------|-----------|-----------|-----------|-----------|-----------|-----------|-----------|
| LN407.192 |
| 35998     | 46578.27  | 17516.06  | 31986.44  | 48792.99  | 78053.83  | 24180.06  | 30137.74  | 96530.48  | 53599.78  |
| 32807.84  | 52488.95  | 34699.24  | 32184.19  | 30495.86  | 113379    | 15778.3   | 29469.45  | 65752.36  | 42853.84  |
| 36314.55  | 42670.06  | 19940.92  | 33029.31  | 39147.24  | 64833.14  | 16698.15  | 15945.4   | 71263.55  | 43261.53  |
| 37401.27  | 42879.76  | 21192.21  | 34266.4   | 44083.52  | 62664.44  | 16787.43  | 16931.9   | 73477.84  | 42215.85  |
| 33269.3   | 42708.46  | 19084     | 36408.07  | 40561.6   | 62264.9   | 16417.28  | 17347.52  | 70129.66  | 43553.42  |

|           |           |           |           |           |           |           |           |           |           |
|-----------|-----------|-----------|-----------|-----------|-----------|-----------|-----------|-----------|-----------|
| LN407.192 |
| 60709.44  | 58699.33  | 36646.28  | 51501.93  | 33042.09  | 18795.87  | 26302.37  | 32971.57  | 30173.81  | 78147.78  |
| 60235.87  | 51802.91  | 55366.42  | 45847.26  | 42000.09  | 16852.53  | 23255.25  | 56041.4   | 42740.22  | 57517.55  |
| 57174.82  | 61689.45  | 38989.44  | 37769.26  | 42435.74  | 20833.62  | 25283.86  | 43777.97  | 43065.78  | 58102.91  |
| 56474.17  | 58805.6   | 37695.58  | 39508.2   | 43913.7   | 17277.27  | 28136.23  | 41272.55  | 40358.51  | 51767.27  |
| 58040.36  | 64610.11  | 38281.37  | 35526.18  | 39221.12  | 19577.38  | 22547.97  | 39705.12  | 39378.14  | 54985.02  |

|           |           |           |           |           |           |           |           |           |           |
|-----------|-----------|-----------|-----------|-----------|-----------|-----------|-----------|-----------|-----------|
| LN407.847 | LN408.197 | LN408.788 | LN408.822 | LN408.842 | LN408.991 | LN408.991 | LN408.991 | LN408.991 | LN408.991 |
| 17913.43  | 22373.81  | 98463.73  | 104984.5  | 148930.2  | 45052.11  | 92153.23  | 55262.93  | 22413.73  | 106715.9  |
| 17478.02  | 21546.78  | 91917.42  | 150731.4  | 149248.5  | 42440.86  | 102307    | 54183.85  | 22358.82  | 121122.5  |
| 20111.96  | 21616.68  | 94759.56  | 116627.6  | 152399.2  | 44859.49  | 108447.4  | 74040.34  | 20203.84  | 59083.37  |
| 17980.86  | 16337.09  | 106330.2  | 128188.1  | 156413.5  | 70105.12  | 61608.58  | 64495.56  | 17889.05  | 65542.16  |
| 19633.98  | 20439.95  | 132026.6  | 161349    | 183253.3  | 34352.38  | 61072.87  | 62040.73  | 22262.26  | 70677.94  |

|           |           |           |           |           |           |           |           |           |           |
|-----------|-----------|-----------|-----------|-----------|-----------|-----------|-----------|-----------|-----------|
| LN408.991 | LN408.991 | LN408.991 | LN408.991 | LN408.991 | LN408.991 | LN408.992 | LN408.991 | LN408.991 | LN408.991 |
| 77026.29  | 46774.33  | 78588.91  | 73569.5   | 54210.66  | 95193.22  | 21922.56  | 47723.61  | 83862.22  | 123911.4  |
| 82382.2   | 50088.13  | 89134.8   | 92155.07  | 82361.99  | 107295.9  | 43419.66  | 43975.86  | 62197.12  | 62363.51  |
| 63341.03  | 47258.9   | 84089.55  | 78069.89  | 77396.84  | 127214.4  | 20262.75  | 44745.48  | 61791.69  | 107012.6  |
| 78083.61  | 69579.84  | 87884.99  | 92209.54  | 68668.11  | 118778.5  | 32254.03  | 47801.12  | 74771.43  | 108670.8  |
| 123828.4  | 43784.67  | 83141.89  | 133294.6  | 77956.41  | 118416.7  | 28989.19  | 41616.35  | 42460.47  | 87680.4   |

|           |           |           |           |           |           |           |           |           |           |
|-----------|-----------|-----------|-----------|-----------|-----------|-----------|-----------|-----------|-----------|
| LN408.991 | LN408.991 | LN408.992 | LN408.991 | LN408.991 | LN408.991 | LN408.991 | LN408.992 | LN408.991 | LN408.991 |
| 44951.67  | 54073.63  | 25955.91  | 48097.87  | 67987.34  | 74676.69  | 49761.88  | 45677.62  | 81574.29  | 44243.75  |
| 34907.78  | 57233.08  | 26664.54  | 38158.51  | 129304.4  | 78273.53  | 64768.88  | 38444.21  | 63635.17  | 55521.04  |
| 51547.42  | 46392.04  | 28793.48  | 39260.08  | 84673.82  | 69577.14  | 63641.67  | 42407.16  | 67143.51  | 47338.02  |
| 49582.24  | 61441.6   | 28882.8   | 49887.7   | 73271.24  | 81834.06  | 66791.7   | 51853.22  | 62104.37  | 55426.78  |
| 40810.68  | 60008.26  | 21287.8   | 56842.74  | 67953.33  | 68756.82  | 57642.12  | 41708.38  | 53971.78  | 50849.84  |

|           |           |           |           |           |           |           |           |           |           |
|-----------|-----------|-----------|-----------|-----------|-----------|-----------|-----------|-----------|-----------|
| LN408.991 | LN408.992 | LN408.991 | LN408.991 |
| 88003.05  | 64083.43  | 82661.28  | 50484.64  | 75325.53  | 57523.09  | 34982.97  | 24749.83  | 71364.38  | 70252.79  |
| 66661.42  | 68299.94  | 61102.22  | 45903.68  | 87509.62  | 45222.42  | 46174     | 22199.07  | 69159     | 54966.74  |
| 75838.36  | 49592.67  | 93916.95  | 64157.6   | 70851.81  | 47220.65  | 33037.82  | 31880.89  | 73183.78  | 97169.63  |
| 69078.49  | 45765.64  | 66484.43  | 49168.4   | 84201.02  | 48087.8   | 35202.19  | 37958.18  | 109856.1  | 67755.85  |
| 69603.8   | 68258.3   | 58202.31  | 46995.88  | 81614.81  | 62661.39  | 57688.39  | 16711.78  | 76590.86  | 66035.13  |



|           |           |           |           |           |           |           |           |           |           |
|-----------|-----------|-----------|-----------|-----------|-----------|-----------|-----------|-----------|-----------|
| LN408.991 | LN408.991 | LN408.991 | LN408.992 | LN408.991 | LN408.991 | LN408.991 | LN408.992 | LN408.992 | LN408.991 |
| 132851.9  | 50870.68  | 133179    | 31772.94  | 82102.66  | 59582.9   | 77993.3   | 26514.3   | 35115.92  | 81308.62  |
| 106229.5  | 46485.42  | 84291.16  | 28940     | 88359.27  | 75043.78  | 62422     | 34557.81  | 38157.06  | 75519.33  |
| 108008.6  | 50608.69  | 107383.7  | 29415.32  | 74386.45  | 60840.56  | 55425.94  | 26614.43  | 43344.29  | 60994.49  |
| 73723.21  | 60423.81  | 97832.41  | 22532.32  | 74528.61  | 59519.36  | 81058.71  | 25264.82  | 42149.8   | 97950.08  |
| 177580.6  | 48906.2   | 109610.5  | 38317.37  | 82611.51  | 47940.98  | 81756.59  | 41584.37  | 41240.51  | 56177.35  |

|           |           |           |           |           |           |           |           |           |           |
|-----------|-----------|-----------|-----------|-----------|-----------|-----------|-----------|-----------|-----------|
| LN408.991 | LN408.991 | LN408.991 | LN408.991 | LN408.991 | LN408.992 | LN408.992 | LN408.991 | LN408.991 | LN408.991 |
| 64782.7   | 59737.99  | 65306.46  | 56011.9   | 75346.55  | 57633.8   | 32817.4   | 42225.26  | 103104.5  | 71904.35  |
| 85922.14  | 33803.03  | 44772.32  | 65055.86  | 60921.31  | 60435.03  | 32288.16  | 43533.69  | 62867.2   | 77483.48  |
| 87395.5   | 54210.54  | 63543.62  | 77560.1   | 49363.06  | 49537.38  | 30174.83  | 39905.33  | 97574.34  | 106462.1  |
| 88332.82  | 59958.16  | 59805.1   | 69843.2   | 63650.26  | 126540.5  | 32662.95  | 26044.47  | 65107.15  | 81383.34  |
| 88484.54  | 45897.18  | 82620.13  | 65164.69  | 77740.47  | 44095.05  | 36871.77  | 33546.35  | 86248.51  | 64482.28  |

|           |           |           |           |           |           |           |           |           |           |
|-----------|-----------|-----------|-----------|-----------|-----------|-----------|-----------|-----------|-----------|
| LN408.991 | LN408.991 | LN408.991 | LN408.991 | LN408.992 | LN408.992 | LN408.991 | LN408.991 | LN408.992 | LN408.991 |
| 85103.27  | 46015.69  | 87151.04  | 80486.39  | 32258.78  | 42844.01  | 105681.9  | 92021.7   | 49455.47  | 43986.26  |
| 102904.2  | 50539.25  | 102997.9  | 113226.8  | 33554.86  | 49570.16  | 122399.6  | 163798.5  | 40229.21  | 54116.47  |
| 136801.7  | 74433.89  | 96473.27  | 70230.72  | 40840.21  | 45883.42  | 67395.17  | 90817.48  | 49357.95  | 40538.44  |
| 114673    | 58878.67  | 107723.7  | 75798.6   | 32402.94  | 40663.01  | 92986.35  | 99347.29  | 41799.54  | 50386.59  |
| 124908.3  | 60676.2   | 163457.3  | 72174.43  | 34861.41  | 47238.14  | 107772.7  | 96402.99  | 43649.65  | 62863.14  |

|           |           |           |           |           |           |           |           |           |           |
|-----------|-----------|-----------|-----------|-----------|-----------|-----------|-----------|-----------|-----------|
| LN408.991 |
| 78189.78  | 73614.22  | 133639.1  | 46772.38  | 90380.13  | 43710.06  | 53536.3   | 83052.76  | 43726.23  | 35599.66  |
| 91949.92  | 137483.1  | 108719.1  | 40356     | 114826.9  | 53812.93  | 48425.75  | 101865.9  | 74169.81  | 42919.59  |
| 76532.51  | 125548.6  | 169536.2  | 44257.15  | 105782.5  | 60044.29  | 47983.21  | 78058.73  | 54471.44  | 38752.42  |
| 82345.53  | 91365.44  | 131108.8  | 35781.79  | 87134.22  | 43861.92  | 73636.13  | 88159.18  | 89999.05  | 42356.83  |
| 73867.13  | 87855.64  | 101226.6  | 48508.65  | 78506.24  | 49965.97  | 38284.01  | 99932.61  | 47559.46  | 45816.64  |

|           |           |           |           |           |           |           |           |           |           |
|-----------|-----------|-----------|-----------|-----------|-----------|-----------|-----------|-----------|-----------|
| LN408.991 | LN408.991 | LN408.992 | LN408.991 | LN409.136 | LN409.209 | LN409.311 | LN409.405 | LN409.405 | LN409.824 |
| 42338.06  | 34510.99  | 26900.36  | 89910.53  | 16437.34  | 66488.64  | 44170.07  | 27523.05  | 21911.02  | 19144.23  |
| 54364.55  | 55264.34  | 39456.38  | 79100     | 14870.46  | 94161.94  | 41654.7   | 31755.88  | 20307.26  | 15868.6   |
| 39226.08  | 39131.93  | 26378.57  | 88598.09  | 16021.48  | 87611.84  | 40667.24  | 29797.92  | 19317.25  | 16802.56  |
| 48871.06  | 47160.88  | 26729.51  | 85701.19  | 13315.91  | 65176.63  | 34456.49  | 29879.79  | 20365.23  | 17958.83  |
| 49961.3   | 46412.34  | 36849.32  | 86734.14  | 14364.26  | 81326.22  | 36701.66  | 29650.66  | 20005.51  | 17183.29  |

|           |           |           |           |           |           |           |           |           |           |
|-----------|-----------|-----------|-----------|-----------|-----------|-----------|-----------|-----------|-----------|
| LN410.789 | LN410.823 | LN410.841 | LN411.026 | LN411.026 | LN411.207 | LN412.839 | LN412.967 | LN413.004 | LN413.023 |
| 24136.68  | 21105.15  | 13104.33  | 54990.8   | 47613.6   | 14387.46  | 11624.69  | 52781.09  | 36915.16  | 16356.09  |
| 22601.15  | 19541.73  | 29683.75  | 57737.13  | 47775.82  | 16013.54  | 13103.16  | 48617.27  | 40880.52  | 49708.43  |
| 22272.1   | 18298.36  | 22140.38  | 56620.47  | 46947.35  | 13532.28  | 13152.63  | 49834.3   | 37578.96  | 49901.51  |
| 22968.35  | 17746.31  | 24518.97  | 55578.33  | 46749.58  | 14695.54  | 13415.49  | 45376.02  | 38582.96  | 46930.29  |
| 25595.3   | 17866.29  | 25595.3   | 60506.21  | 43761.42  | 12522.64  | 11132.5   | 46164.58  | 37189.54  | 44697.65  |

|           |           |           |           |           |           |           |           |           |           |
|-----------|-----------|-----------|-----------|-----------|-----------|-----------|-----------|-----------|-----------|
| LN413.023 | LN413.023 | LN413.023 | LN413.023 | LN413.023 | LN413.041 | LN413.222 | LN414.225 | LN414.322 | LN414.322 |
| 17594.15  | 16134.19  | 17575.89  | 17576.93  | 28093.74  | 56522.75  | 206321.5  | 34003.71  | 13971.72  | 11282.46  |
| 38018.13  | 47151.98  | 39494.95  | 39170.3   | 64466.14  | 53581.27  | 224956.2  | 36403.47  | 12576.86  | 10156.52  |
| 39529.18  | 42129.86  | 39322.85  | 39062     | 59797.6   | 52128.79  | 219224    | 40614.07  | 6479.162  | 5268.992  |
| 37059.19  | 44154.41  | 39946.18  | 37453.63  | 64293.28  | 54853.16  | 185927.1  | 36680.64  | 2411.774  | 2550.008  |
| 37467.13  | 42984.54  | 36660.44  | 41164.07  | 60433.03  | 57402.94  | 217226.4  | 33329.42  | 411.76    | 411.76    |

|           |           |           |           |           |           |           |           |           |           |
|-----------|-----------|-----------|-----------|-----------|-----------|-----------|-----------|-----------|-----------|
| LN414.982 | LN414.982 | LN415.001 |
| 44872.63  | 56330.25  | 17875.27  | 22228.66  | 38046.03  | 33335.56  | 63058.7   | 50555.65  | 41188.56  | 79689.82  |
| 50377.16  | 56837.75  | 15901.1   | 22924.1   | 35808.5   | 28957.54  | 39513.22  | 54421.66  | 44860.25  | 58037.76  |
| 51115.77  | 54003.63  | 12877.59  | 26999.3   | 40376.96  | 29675.67  | 48680.66  | 57326.65  | 41986.17  | 61102.36  |
| 46647.45  | 48449.05  | 14662.78  | 26403.52  | 42372.42  | 31183.75  | 39463.95  | 63141.66  | 42776.26  | 60660.83  |
| 45972.13  | 59091.3   | 14180.72  | 30184.33  | 38084.16  | 29640.2   | 41029.1   | 57137.33  | 40390.39  | 64098.13  |



|           |           |           |           |           |           |           |           |           |           |
|-----------|-----------|-----------|-----------|-----------|-----------|-----------|-----------|-----------|-----------|
| LN415.001 | LN415.001 | LN415.001 | LN415.000 | LN415.001 | LN415.001 | LN415.001 | LN415.001 | LN415.001 | LN415.001 |
| 42342.48  | 46247.59  | 36408.23  | 50411.38  | 47272.54  | 41078.43  | 63951.31  | 68269.84  | 40634.97  | 25789.42  |
| 49966.23  | 33555.73  | 35672.93  | 31965.14  | 42754.09  | 61197.64  | 44218.39  | 61954.94  | 40261.42  | 32312.28  |
| 46150.45  | 33054.37  | 40136.48  | 32863.94  | 41422.88  | 63214.09  | 43547.25  | 66073.08  | 40862.74  | 29261.04  |
| 52521.19  | 36258.94  | 42611.23  | 29252.56  | 40685.6   | 59718.5   | 45598.73  | 62186.87  | 36090.31  | 30477.28  |
| 43521.52  | 37429.67  | 42888.45  | 29692.89  | 47370.42  | 68098.06  | 45612.34  | 66619.59  | 39281.93  | 28798.22  |

|           |           |           |           |           |           |           |           |           |           |
|-----------|-----------|-----------|-----------|-----------|-----------|-----------|-----------|-----------|-----------|
| LN415.001 | LN415.002 | LN415.001 | LN415.001 |
| 68711.34  | 28702.84  | 48802.21  | 28354.01  | 29700.9   | 50060.91  | 59958.81  | 11793.3   | 40490.95  | 80255.09  |
| 48838.85  | 21055.99  | 52952.26  | 33568.44  | 41039.74  | 47216.69  | 58310.51  | 12071.13  | 28116.72  | 58665.71  |
| 49363.07  | 22337.51  | 45102.69  | 30708.17  | 45502     | 40933.4   | 56789.24  | 13561.19  | 31282.53  | 56748.01  |
| 47639.96  | 25351.5   | 46790.11  | 31016.87  | 45652.79  | 45688.88  | 54320.11  | 13921.09  | 29904.99  | 56670.84  |
| 50229.91  | 22275.06  | 44740.14  | 33283.92  | 43464.92  | 43214.95  | 59464.16  | 12429.59  | 30524.81  | 51801.25  |

|           |           |           |           |           |           |           |           |           |           |
|-----------|-----------|-----------|-----------|-----------|-----------|-----------|-----------|-----------|-----------|
| LN415.001 | LN415.001 | LN415.001 | LN415.001 | LN415.002 | LN415.001 | LN415.001 | LN415.001 | LN415.001 | LN415.001 |
| 50321.35  | 29419.17  | 44986.82  | 20370.04  | 21287.99  | 20649.39  | 30570.28  | 22641.75  | 54997.33  | 73806.07  |
| 61201.89  | 30214.28  | 44381.27  | 25767.47  | 19700.94  | 19879.09  | 30345.89  | 33358.63  | 44530.1   | 56605.77  |
| 53524.55  | 29696.21  | 42786.07  | 25826.67  | 15021.02  | 22258.66  | 28598.64  | 35054.6   | 44196.66  | 49718.79  |
| 60935.13  | 32411.33  | 38664.82  | 27755.44  | 18278.15  | 21689.22  | 32561.17  | 30975.07  | 44292.43  | 49405.91  |
| 53071     | 30251.11  | 46472.44  | 29348.86  | 17527.49  | 20457.52  | 28654.36  | 33020.87  | 44934.35  | 49951.26  |

|           |           |           |           |           |           |           |           |           |           |
|-----------|-----------|-----------|-----------|-----------|-----------|-----------|-----------|-----------|-----------|
| LN415.001 | LN415.002 |
| 43941.35  | 45981.26  | 44599.32  | 48434.4   | 22527.71  | 43287.1   | 31460.61  | 36234.96  | 36738.77  | 28867.99  |
| 49145.01  | 46434.54  | 42423.88  | 43622.85  | 26817.62  | 59090.95  | 44812.9   | 39914.79  | 35695.45  | 20522.95  |
| 52244.74  | 38854.61  | 45449.65  | 43349.03  | 28139.53  | 57198.43  | 49017.07  | 42609.66  | 35554.18  | 18071.45  |
| 53677.55  | 41781.55  | 43341.5   | 48193.17  | 27656.5   | 54304.07  | 46013.75  | 43200.7   | 34341.55  | 15889.57  |
| 54897.62  | 44882.86  | 41870.47  | 43621.95  | 28209.95  | 57142.77  | 42087.93  | 38627.15  | 29172.68  | 17893.2   |

|           |           |           |           |           |           |           |           |           |           |
|-----------|-----------|-----------|-----------|-----------|-----------|-----------|-----------|-----------|-----------|
| LN415.001 | LN415.002 | LN415.001 | LN415.001 |
| 32021.67  | 30256.43  | 50284.28  | 28169.08  | 49169.33  | 40531.85  | 26510.4   | 18522.37  | 49381.24  | 51805.77  |
| 24884.11  | 24270.21  | 48004.54  | 32276.79  | 62509.48  | 33213.41  | 22592.13  | 22477.24  | 41267.69  | 39737.23  |
| 25639.47  | 25816.06  | 43547.85  | 31508.43  | 60566.68  | 32809.74  | 25100.7   | 21825.54  | 34841.19  | 37224.6   |
| 25504.45  | 27680.89  | 44766.13  | 28239.26  | 61223.16  | 32642.8   | 24282.86  | 19694.58  | 40862.84  | 39646.6   |
| 22395.99  | 27588.09  | 47511.93  | 29049.38  | 55001.69  | 33377.77  | 23552.35  | 20564.2   | 38147.17  | 35178.47  |

|           |           |           |           |           |           |           |           |           |           |
|-----------|-----------|-----------|-----------|-----------|-----------|-----------|-----------|-----------|-----------|
| LN415.001 | LN415.002 |
| 22869.44  | 32556.55  | 35549.92  | 26781.46  | 30195.87  | 39564.61  | 41217.79  | 22959.92  | 18231.28  | 34916.56  |
| 23198.83  | 37109.28  | 39312.83  | 27905.28  | 32001.01  | 27340.55  | 40223.14  | 20843.62  | 25092.15  | 29707.31  |
| 19285.26  | 33729.19  | 36766.05  | 25427.42  | 28285.47  | 24867.28  | 42161.84  | 18429.97  | 25582.52  | 30581.79  |
| 23436.97  | 35652.36  | 36036.99  | 25997.74  | 28873.12  | 27023.94  | 35145.27  | 20397.83  | 23617.23  | 32432.32  |
| 25609.58  | 35844.78  | 33428.73  | 28746.13  | 29601.15  | 28207.87  | 37646.41  | 17941.08  | 24356.76  | 32230.66  |

|           |           |           |           |           |           |           |           |           |           |
|-----------|-----------|-----------|-----------|-----------|-----------|-----------|-----------|-----------|-----------|
| LN415.001 | LN415.000 | LN415.001 | LN415.000 |
| 31223     | 27558.48  | 28418.67  | 54844.02  | 35062.61  | 44075.32  | 24630.3   | 59751.37  | 32660.44  | 73656.34  |
| 29095.43  | 26983.34  | 27262.76  | 50607.5   | 33924.72  | 33425.65  | 35884.43  | 63152.76  | 33618.66  | 59675.21  |
| 27524.15  | 22759.12  | 27341.51  | 44991.7   | 30622.14  | 35929.35  | 28011.64  | 55849.5   | 33084.78  | 62019.26  |
| 25867.66  | 24397.19  | 27525.38  | 45223.72  | 35144.18  | 35301.76  | 31702.92  | 57819.25  | 28049.07  | 66612.6   |
| 27391.74  | 25717.82  | 28485.16  | 51999.81  | 27065.15  | 37528.59  | 31054.88  | 64742.33  | 34670.91  | 69555.28  |

|           |           |           |           |           |           |           |           |           |           |
|-----------|-----------|-----------|-----------|-----------|-----------|-----------|-----------|-----------|-----------|
| LN415.001 | LN415.002 | LN415.002 | LN415.001 | LN415.001 | LN415.001 | LN415.001 | LN415.036 | LN415.036 | LN415.036 |
| 65674.55  | 17161.71  | 15618.15  | 27850.25  | 42288.47  | 16698.69  | 28411.32  | 48547.11  | 53364.94  | 49624.64  |
| 56660.07  | 15812.16  | 18971.33  | 30018.2   | 40674.79  | 16705.64  | 31537.99  | 46324.42  | 54697.6   | 55027.35  |
| 53379.55  | 15396.25  | 17128.78  | 32767.27  | 40463.11  | 15943.31  | 29327.53  | 46411.32  | 47754.47  | 50449.27  |
| 52004.21  | 16312.8   | 18870.38  | 28893.22  | 38644.59  | 15562.82  | 30108.15  | 51072.86  | 54103.12  | 47056.71  |
| 51546.97  | 15441.74  | 17882.5   | 29159.01  | 38192.74  | 14659.37  | 31489.07  | 52160.57  | 49400.26  | 48456.33  |



|           |           |           |           |           |           |           |           |           |           |
|-----------|-----------|-----------|-----------|-----------|-----------|-----------|-----------|-----------|-----------|
| LN416.846 | LN416.997 | LN416.997 | LN416.999 | LN416.999 | LN416.999 | LN416.998 | LN416.998 | LN416.999 | LN416.999 |
| 59452.81  | 50497.7   | 41162.07  | 41955.32  | 33501.18  | 15524.62  | 43275.26  | 56661.53  | 24763.45  | 29811.35  |
| 48049.59  | 45967.04  | 46804.57  | 46003.13  | 31462.73  | 20336.1   | 42345.28  | 66413.48  | 36379.65  | 31914.16  |
| 38544.36  | 47684.88  | 48271.87  | 35713.12  | 32423.52  | 15113.14  | 43032.26  | 60422.56  | 29960.15  | 23877.35  |
| 52700.85  | 54246.22  | 28275.11  | 38326     | 33574.51  | 27123.73  | 47171.94  | 61608.43  | 27905.26  | 33387.86  |
| 45724.64  | 46489.93  | 45095.31  | 47095.89  | 31009.97  | 17440.73  | 40466.9   | 53351.27  | 26653.96  | 37058.3   |

|           |           |           |           |           |           |           |           |           |           |
|-----------|-----------|-----------|-----------|-----------|-----------|-----------|-----------|-----------|-----------|
| LN416.998 | LN416.999 | LN416.998 | LN416.998 | LN416.998 | LN416.999 | LN416.998 | LN416.999 | LN416.998 | LN416.998 |
| 45172.29  | 28723.68  | 34135.84  | 44978.98  | 51267.18  | 22217.41  | 52503.57  | 35348.59  | 37585.08  | 21768.31  |
| 54208.06  | 28927.19  | 37544.84  | 40530.6   | 74999.94  | 32484.59  | 59644.95  | 36649.8   | 54099.81  | 20321.67  |
| 60180.76  | 49917.81  | 35042.42  | 50117.42  | 48146.72  | 23226.67  | 54724.43  | 33620.61  | 51612.64  | 23820.09  |
| 44699.27  | 35538.87  | 50992.27  | 59457.77  | 44122.41  | 23492.06  | 45847.81  | 48464.64  | 34026.47  | 19006.37  |
| 48156.68  | 25185.68  | 30564.26  | 44374.44  | 55781.75  | 22034.75  | 51859.96  | 34174.23  | 37060     | 19591.05  |

|           |           |           |           |           |           |           |           |           |           |
|-----------|-----------|-----------|-----------|-----------|-----------|-----------|-----------|-----------|-----------|
| LN416.998 | LN416.998 | LN416.998 | LN416.999 | LN416.998 | LN416.998 | LN416.998 | LN416.999 | LN416.999 | LN416.999 |
| 38280.16  | 34575.41  | 46241.22  | 36183.61  | 44671.24  | 39796.24  | 44325.73  | 34561.04  | 19308.84  | 25933.9   |
| 32437.87  | 35573.57  | 32114.97  | 36952.55  | 49061.27  | 36417.03  | 42627.67  | 40921.67  | 16114     | 24175.41  |
| 39211.88  | 26092.96  | 31124.88  | 42226.53  | 45317.56  | 40932.18  | 52814.48  | 29310.5   | 15426.74  | 23459.23  |
| 35326.42  | 32793.82  | 36946.79  | 46631.93  | 57676.48  | 28902.64  | 39052.66  | 34166.35  | 20051.15  | 27901.66  |
| 36525.56  | 36325.11  | 42441.74  | 34726.92  | 48593.51  | 37459.24  | 42559.77  | 33161.16  | 15224.54  | 22779.25  |

|           |           |           |           |           |           |           |           |           |           |
|-----------|-----------|-----------|-----------|-----------|-----------|-----------|-----------|-----------|-----------|
| LN416.999 | LN416.998 | LN416.999 | LN416.998 | LN416.999 | LN416.999 | LN416.998 | LN416.999 | LN416.999 | LN416.999 |
| 17566.3   | 26930.03  | 33229.16  | 40073.09  | 32932.27  | 35084.16  | 25238.05  | 15756.4   | 23995.84  | 37415.94  |
| 22798.35  | 32653.38  | 25290.2   | 43799.72  | 28779.95  | 34146.83  | 29538.02  | 21323.91  | 40708.84  | 33081.66  |
| 19621.6   | 35321.1   | 27066.35  | 51461.32  | 36956.15  | 33704.51  | 31141.15  | 13825.11  | 23712.44  | 34534.83  |
| 17789.5   | 30427.81  | 33768.24  | 45196.93  | 25715.81  | 45054.71  | 41560     | 15026.31  | 22285.13  | 34509.42  |
| 16273.96  | 25218.35  | 28995.1   | 40313.26  | 29146.73  | 44616.21  | 28823.76  | 15038.39  | 27983.95  | 29528.25  |

|           |           |           |           |           |           |           |           |           |           |
|-----------|-----------|-----------|-----------|-----------|-----------|-----------|-----------|-----------|-----------|
| LN416.998 | LN416.999 | LN416.998 | LN416.998 | LN416.999 | LN416.999 | LN416.999 | LN416.999 | LN416.998 | LN416.998 |
| 37079.48  | 17239.18  | 63807.75  | 50936.45  | 32879.24  | 31396.67  | 38373.96  | 30441.4   | 29663.55  | 62558.8   |
| 30487.25  | 18206.69  | 76413.08  | 40010.76  | 48612.64  | 42693.03  | 63444.14  | 42700.53  | 32210.38  | 45243.79  |
| 29946.09  | 21868.32  | 59546.24  | 55683.04  | 32318.46  | 39571.41  | 45658.85  | 49056.93  | 26667.89  | 69263.58  |
| 32095.82  | 17445.12  | 64967.64  | 45685.4   | 35364.46  | 37516.69  | 49251.13  | 50327.87  | 34189.04  | 66701.78  |
| 43908.3   | 17160.29  | 56336.88  | 55771.51  | 37118.36  | 28337.4   | 39125.91  | 35985.4   | 23771.52  | 60883.4   |

|           |           |           |           |           |           |           |           |           |           |
|-----------|-----------|-----------|-----------|-----------|-----------|-----------|-----------|-----------|-----------|
| LN416.999 | LN416.999 | LN416.998 | LN416.998 | LN416.999 | LN416.999 | LN416.998 | LN416.998 | LN416.998 | LN416.998 |
| 16066.04  | 25016.46  | 44032.45  | 19703.51  | 31180.85  | 21486.57  | 18295.6   | 37794.97  | 28810.56  | 43442.24  |
| 18111.38  | 27483.64  | 49484.98  | 26383.32  | 26877.16  | 20544.02  | 12257.13  | 44094.16  | 34820.29  | 36796.76  |
| 19081.97  | 25923.68  | 65625.54  | 16891.85  | 18942.98  | 29757.59  | 13506.86  | 35299.99  | 29846.92  | 43605.3   |
| 15854.85  | 27679.68  | 51738.1   | 19257.25  | 26750.62  | 14368.41  | 13698.18  | 44268.28  | 31494.53  | 46741.84  |
| 17115.42  | 23114.33  | 41911.01  | 20741.68  | 31642.43  | 18705.5   | 15713.82  | 38311.49  | 32657.8   | 44269.9   |

|           |           |           |           |           |           |           |           |           |           |
|-----------|-----------|-----------|-----------|-----------|-----------|-----------|-----------|-----------|-----------|
| LN416.998 | LN416.999 | LN416.998 | LN416.998 | LN416.998 | LN416.999 | LN416.999 | LN416.998 | LN416.998 | LN416.998 |
| 58244.43  | 29954.44  | 36395.52  | 44775.23  | 32257.92  | 31118.85  | 18910.47  | 51171.7   | 44485.28  | 38736.66  |
| 79963.68  | 26857.78  | 31435.61  | 38269.05  | 21152.39  | 37683.52  | 22737.19  | 53957.82  | 52310.51  | 35396.34  |
| 61271.16  | 34033.56  | 36922.89  | 32684.19  | 34123.61  | 36568.01  | 15452.81  | 46915.92  | 51907.43  | 47110.41  |
| 69107.72  | 25294.78  | 46970.61  | 44785.87  | 19252.49  | 31090.87  | 14043.79  | 45016.03  | 49853.76  | 37503.08  |
| 56071.95  | 31981.04  | 36281     | 45336.31  | 29718.44  | 30971.58  | 18297.3   | 52854.27  | 45761.78  | 40834.45  |

|           |           |           |           |           |           |           |           |           |           |
|-----------|-----------|-----------|-----------|-----------|-----------|-----------|-----------|-----------|-----------|
| LN416.998 | LN416.998 | LN416.998 | LN416.999 | LN416.999 | LN416.999 | LN416.998 | LN416.998 | LN416.998 | LN416.999 |
| 49724.96  | 34640.59  | 41906.41  | 28869.06  | 29128.86  | 38061.53  | 42428.2   | 32579.54  | 35652.09  | 24425.94  |
| 40166.86  | 45145.6   | 33407.45  | 24541.46  | 28043.42  | 31219.52  | 40527.39  | 23774.76  | 33118.63  | 27372.09  |
| 46600.03  | 57152.73  | 39591.83  | 25131.13  | 34856.26  | 25231.94  | 37480.28  | 29616.6   | 33134.83  | 28222.57  |
| 51610.32  | 35427.84  | 37679.52  | 26991.07  | 35776.67  | 33264.71  | 43831.97  | 26770.41  | 35382.96  | 25624.98  |
| 50809.57  | 34948.67  | 47067.78  | 28920.87  | 27127.79  | 33965.74  | 42522.32  | 27726.03  | 34199.19  | 24807.8   |



|           |           |           |           |           |           |           |           |           |           |
|-----------|-----------|-----------|-----------|-----------|-----------|-----------|-----------|-----------|-----------|
| LN416.998 | LN416.998 | LN416.998 | LN416.998 | LN416.999 | LN416.999 | LN416.999 | LN416.998 | LN416.998 | LN417.016 |
| 42303.93  | 32610.26  | 53150.66  | 47243.02  | 25813.18  | 15075.4   | 33170.67  | 46701.57  | 27125.36  | 55126.97  |
| 47871.25  | 30236.44  | 37459.14  | 48108.4   | 27617.13  | 14216.69  | 30259.68  | 48750.83  | 24839.48  | 52361.69  |
| 43683.55  | 33025.35  | 52528.8   | 46527.91  | 37658.96  | 13171.79  | 33589.48  | 41843.14  | 29651.01  | 61227.16  |
| 44333.4   | 32653.32  | 47859.81  | 43069.25  | 29979.59  | 17825.69  | 30602.14  | 48045.8   | 28165.77  | 56857.56  |
| 45106.64  | 29930.92  | 44450.17  | 46818.37  | 26784.7   | 14738.44  | 31598.76  | 49883.41  | 25672.23  | 56640.63  |

|           |           |           |           |           |           |           |           |           |           |
|-----------|-----------|-----------|-----------|-----------|-----------|-----------|-----------|-----------|-----------|
| LN417.035 | LN417.035 | LN417.208 | LN417.212 |
| 52246.13  | 44132.35  | 22549.4   | 29805.11  | 27402.32  | 17646.47  | 21199.49  | 21508.97  | 18787.87  | 18518.48  |
| 53123.16  | 47340.73  | 19792.28  | 29641.36  | 28918.39  | 16128.35  | 20822.22  | 20721.34  | 19195.95  | 16116.42  |
| 49771.46  | 47383.84  | 23086.39  | 26918.8   | 27579.17  | 18295.05  | 21613.27  | 20052.17  | 18420.99  | 18302.41  |
| 51004.3   | 46313.34  | 18690.92  | 29588.92  | 28393.34  | 17194.9   | 19176.4   | 23618.46  | 17353.04  | 18491.13  |
| 43665.35  | 43333.34  | 17876.89  | 27468.14  | 28311.11  | 16233.21  | 19588.43  | 21256.76  | 14999     | 16368.3   |

|           |           |           |           |           |           |           |           |           |           |
|-----------|-----------|-----------|-----------|-----------|-----------|-----------|-----------|-----------|-----------|
| LN417.854 | LN418.994 | LN418.995 | LN418.995 | LN418.995 | LN418.994 | LN418.996 | LN418.996 | LN418.995 | LN418.995 |
| 35868.96  | 40445.46  | 40477.31  | 30327.9   | 16095.87  | 64398.04  | 27242.21  | 18066.39  | 29654.97  | 51877.09  |
| 25994.02  | 38506.98  | 52054.48  | 27869.57  | 16057.55  | 57699.79  | 22690.76  | 15419.43  | 23103.22  | 38653.43  |
| 40860.3   | 39581.87  | 48863.03  | 24470.46  | 14840.01  | 63160.13  | 24299.65  | 17943.72  | 24298.73  | 41588.48  |
| 31748.8   | 40290.38  | 47170.16  | 24558.79  | 14936.74  | 59329.58  | 22150.92  | 18634.25  | 23587.72  | 43434.4   |
| 37360.36  | 40932.09  | 52079.01  | 26975.6   | 13548     | 62904.93  | 23431.3   | 15999.75  | 23955.38  | 39834.08  |

|           |           |           |           |           |           |           |           |           |           |
|-----------|-----------|-----------|-----------|-----------|-----------|-----------|-----------|-----------|-----------|
| LN418.995 |
| 60791.84  | 51661.99  | 21910.34  | 59847.08  | 56867.44  | 37961.32  | 31415.19  | 46170.21  | 34124.41  | 36954.95  |
| 54968.32  | 54235.57  | 22990.3   | 43607.64  | 59586.91  | 29698.75  | 32647.85  | 39913.68  | 31870.73  | 35539.43  |
| 56258.04  | 54158.9   | 22234.22  | 47492.04  | 66071.34  | 30721     | 32393.46  | 40989.92  | 33280.63  | 34578.94  |
| 58058     | 51340.45  | 21249.4   | 46465.9   | 65826.01  | 30767.89  | 33242.41  | 34433.13  | 34861.29  | 35226.8   |
| 61076.84  | 59320.57  | 23044.97  | 46709.63  | 62280.12  | 27721.87  | 32557.15  | 38064.51  | 32579.87  | 34030.11  |

|           |           |           |           |           |           |           |           |           |           |
|-----------|-----------|-----------|-----------|-----------|-----------|-----------|-----------|-----------|-----------|
| LN418.995 |
| 45548.12  | 31709.93  | 37393.51  | 15978.62  | 49793.44  | 75091.37  | 35024.29  | 46484.28  | 30651.25  | 41037.95  |
| 42877.39  | 28767.28  | 37011.06  | 12990.28  | 59101.51  | 49794.19  | 29519.41  | 34060.9   | 28200.5   | 41581.87  |
| 40039.18  | 31650.78  | 38900.45  | 16267.99  | 62233.71  | 48152.82  | 31809.2   | 31712.34  | 25033.64  | 42243.92  |
| 36181.48  | 33813.63  | 37218.21  | 15153.43  | 55434.36  | 52484.73  | 30974.13  | 32310.71  | 26130.31  | 35971.58  |
| 37179.75  | 29632.74  | 36594.8   | 17046.26  | 57349.99  | 49558.5   | 32621.89  | 34116.8   | 27704.15  | 42177.62  |

|           |           |           |           |           |           |           |           |           |           |
|-----------|-----------|-----------|-----------|-----------|-----------|-----------|-----------|-----------|-----------|
| LN418.995 |
| 37187.3   | 30583.41  | 56103.4   | 32132.21  | 40966.1   | 39953.87  | 40223.95  | 57406.64  | 38738.83  | 12357.63  |
| 47127.88  | 30278.95  | 51310.46  | 33604.69  | 40755.94  | 39937.85  | 31067.34  | 57893.18  | 43227.95  | 14929.88  |
| 49834.35  | 30666.14  | 48530.07  | 30093.37  | 39097.29  | 39484.18  | 33765.65  | 56541.04  | 41469.53  | 16426.55  |
| 49920.82  | 31552.38  | 48058.55  | 31733.44  | 35993.16  | 39927.14  | 31101.17  | 55698.71  | 44473.67  | 16279.86  |
| 46291.61  | 27915.29  | 46623.48  | 29583.97  | 35827.18  | 44209.69  | 31044.62  | 55056.42  | 39858.52  | 15366.66  |

|           |           |           |           |           |           |           |           |           |           |
|-----------|-----------|-----------|-----------|-----------|-----------|-----------|-----------|-----------|-----------|
| LN418.995 | LN418.996 |
| 34030.32  | 25309.71  | 60471.63  | 26088.58  | 26278.92  | 71011.72  | 50741.75  | 15761.98  | 28745.03  | 23241.8   |
| 32990.51  | 17080.24  | 41911.5   | 33730.87  | 20854.17  | 44473.32  | 63696.86  | 17777.95  | 31141.99  | 17382.05  |
| 33346.45  | 18564.23  | 45726.58  | 31676.28  | 18477.19  | 44804.19  | 59126.03  | 15877.42  | 32766.62  | 15230.97  |
| 32463.99  | 18165.74  | 39590.71  | 28841.01  | 21291.67  | 44843.53  | 62792.49  | 18984.21  | 32028.99  | 16940.59  |
| 37787.36  | 16949.65  | 42316.58  | 29330.78  | 20273.2   | 44542.69  | 61680.23  | 15763.29  | 32888.25  | 16500.7   |

|           |           |           |           |           |           |           |           |           |           |
|-----------|-----------|-----------|-----------|-----------|-----------|-----------|-----------|-----------|-----------|
| LN418.995 | LN418.995 | LN418.994 | LN418.995 |
| 22889.41  | 31471.95  | 70610.45  | 21827.66  | 35010.68  | 20660.6   | 41419.8   | 36593.46  | 31964.86  | 41537.89  |
| 27926.3   | 26263.35  | 75802.46  | 17696.95  | 35411.37  | 19620.07  | 40239.11  | 31777.89  | 38926.08  | 40713.1   |
| 31790.81  | 26108.1   | 79141.65  | 18258.82  | 33949.8   | 19261.79  | 43708.09  | 35492.9   | 37590.51  | 35770.66  |
| 27478.35  | 24252.5   | 73787.06  | 17568.75  | 32064.1   | 22095.78  | 38894.07  | 30066.88  | 40040.2   | 39296     |
| 30898.26  | 25031.57  | 76255.27  | 18091.03  | 36475.75  | 19690.38  | 44865.91  | 32081.67  | 38042.73  | 41080.42  |



|           |           |           |           |           |           |           |           |           |           |           |
|-----------|-----------|-----------|-----------|-----------|-----------|-----------|-----------|-----------|-----------|-----------|
| LN418.995 | LN418.995 | LN418.994 | LN418.995 | LN418.995 | LN418.995 | LN418.995 | LN418.995 | LN418.996 | LN418.995 | LN418.995 |
| 54229.48  | 29921.13  | 60706.72  | 61540.4   | 23954.87  | 21187.62  | 14731.14  | 38163.81  | 63093.78  | 42423.79  |           |
| 42756.64  | 30678.58  | 55969.6   | 54284.3   | 20071.07  | 20420.35  | 16059.3   | 39053.61  | 56916.02  | 47041.6   |           |
| 39163.41  | 28011.98  | 61076.81  | 57699.28  | 19517.63  | 20908.54  | 17696.15  | 33124.92  | 55496.47  | 42043.16  |           |
| 39859.1   | 28066.45  | 57924.31  | 58742.18  | 20277.21  | 21533.89  | 15690.49  | 38349.2   | 58511.43  | 44158.01  |           |
| 41399.94  | 26384.66  | 59288.43  | 57366.91  | 21554.56  | 22733.86  | 14213.15  | 33031.01  | 55415.76  | 48000.08  |           |

|           |           |           |           |           |           |           |           |           |           |
|-----------|-----------|-----------|-----------|-----------|-----------|-----------|-----------|-----------|-----------|
| LN418.995 | LN418.995 | LN418.995 | LN418.995 | LN418.996 | LN418.995 | LN418.995 | LN418.995 | LN418.995 | LN418.995 |
| 60689.76  | 37405.99  | 25741.74  | 20164.6   | 32353.69  | 40396.58  | 32493.67  | 51949.33  | 23506.29  | 46405.12  |
| 56325.43  | 35465.67  | 24813.35  | 21690.02  | 35923.66  | 42680.54  | 29097.96  | 56753.48  | 25687.4   | 49714.63  |
| 49035.7   | 35792.93  | 21112.92  | 19763.76  | 34381.84  | 41029.78  | 33068.92  | 51803.19  | 24236.59  | 46136.88  |
| 52295.42  | 39513.45  | 20198.24  | 20706.86  | 34715.66  | 43582.58  | 30782.51  | 60855.44  | 26267.77  | 46747.9   |
| 55403.39  | 37217.31  | 24055.96  | 20208.94  | 31537     | 44807.97  | 28395.04  | 51995.58  | 24635.86  | 47502.12  |

|           |           |           |           |           |           |           |           |           |           |           |
|-----------|-----------|-----------|-----------|-----------|-----------|-----------|-----------|-----------|-----------|-----------|
| LN418.995 | LN419.166 | LN419.227 | LN419.227 | LN419.228 |
| 57522.18  | 53990.25  | 89369.81  | 26221.68  | 29790.82  | 31406.1   | 69949.49  | 32304.51  | 35615.08  | 41019.69  |           |
| 49208.25  | 42693.59  | 79739.67  | 30968.45  | 36932.72  | 33297.92  | 67349.95  | 32447.59  | 36055.69  | 45791.97  |           |
| 47098.05  | 43094.68  | 83024.46  | 25652.84  | 30224.83  | 30133.04  | 222583.8  | 31815.67  | 34269.12  | 42221.11  |           |
| 47563.57  | 40436.5   | 84092.24  | 30518.34  | 34680.33  | 32177.7   | 198738.2  | 38906.34  | 36174.23  | 44458.95  |           |
| 51539.78  | 44912.6   | 85915.16  | 28089.21  | 36239.82  | 32032.56  | 11595.82  | 29666.12  | 36153.01  | 44223.04  |           |

|           |           |           |           |           |           |           |           |           |           |
|-----------|-----------|-----------|-----------|-----------|-----------|-----------|-----------|-----------|-----------|
| LN419.228 | LN419.228 | LN419.239 | LN419.802 | LN420.242 | LN420.296 | LN420.789 | LN420.841 | LN420.992 | LN420.992 |
| 43479.83  | 32343.59  | 280598.8  | 11139.16  | 57881.6   | 10240.65  | 18916.02  | 23360.11  | 36102.07  | 24018.71  |
| 45642.96  | 30499.33  | 271850.4  | 11197.18  | 62010.43  | 13562.5   | 18940.89  | 27626.41  | 39211.21  | 24255.1   |
| 45975.25  | 29778.7   | 274675.4  | 10072.49  | 61716.1   | 14735.66  | 17904.35  | 26096.59  | 37545.93  | 26058.27  |
| 46130.94  | 33290.38  | 288565.1  | 10277.19  | 48627.56  | 13485.55  | 22754.25  | 29533.19  | 38212.31  | 24383.17  |
| 42782.78  | 33494.95  | 241923    | 13766.88  | 55307.99  | 16680.33  | 25897.61  | 35402.16  | 36784.88  | 25327.09  |

|           |           |           |           |           |           |           |           |           |           |
|-----------|-----------|-----------|-----------|-----------|-----------|-----------|-----------|-----------|-----------|
| LN420.992 |
| 22286.98  | 27140.89  | 20814.66  | 27619.6   | 36651.23  | 36179.21  | 22796.85  | 24526.52  | 33104.97  | 54738.22  |
| 20774.83  | 26645.3   | 21720.21  | 25889.36  | 40337.78  | 37495.8   | 21495.64  | 23302.1   | 33290.16  | 59503.13  |
| 22795.81  | 27553.6   | 23370.12  | 26572.29  | 36810.36  | 33279.26  | 21353.04  | 21902.89  | 33434.01  | 58321.11  |
| 21325.36  | 27457.8   | 25133.27  | 26275.17  | 42476.72  | 36515.31  | 21170.12  | 20061.99  | 34252.45  | 60594.95  |
| 21505.12  | 28086.75  | 21249.52  | 26061.04  | 37978.27  | 33248.52  | 19045.51  | 25267.71  | 32983.75  | 57209.02  |

|           |           |           |           |           |           |           |           |           |           |
|-----------|-----------|-----------|-----------|-----------|-----------|-----------|-----------|-----------|-----------|
| LN420.992 |
| 42180.69  | 19396.27  | 19645.38  | 34288.29  | 49233.05  | 25764.4   | 24307.25  | 16072.77  | 26612.37  | 33305.78  |
| 37775.61  | 20369.79  | 22232.17  | 35095.51  | 52792.36  | 23443.22  | 22414.09  | 16868.24  | 28877.95  | 34464.42  |
| 40246.51  | 21396.31  | 21949.53  | 34457.54  | 51142.02  | 25894.92  | 23337.11  | 13799.8   | 26881.9   | 32399.8   |
| 36162.74  | 20215.46  | 22240.33  | 36087.5   | 53764.85  | 26800.35  | 24859.7   | 14196.18  | 24726.68  | 32908.57  |
| 40132.01  | 18735.46  | 21292.54  | 36628.16  | 53705.52  | 24111.91  | 25397.74  | 15613.58  | 26401.27  | 34922.01  |

|           |           |           |           |           |           |           |           |           |           |
|-----------|-----------|-----------|-----------|-----------|-----------|-----------|-----------|-----------|-----------|
| LN420.992 |
| 69098.93  | 35683.22  | 44128.64  | 30087.4   | 22374.07  | 25663.01  | 26293.9   | 29341.92  | 30759.82  | 57832.09  |
| 71231.77  | 38826.32  | 39936.94  | 35472.16  | 21903.18  | 25265.04  | 25918.45  | 29243.98  | 31614.02  | 56820.67  |
| 72501.62  | 40538.23  | 43190.32  | 28707.98  | 23007.15  | 25427.51  | 25221.76  | 28671.98  | 31572.71  | 52373.39  |
| 73106.27  | 34197.46  | 40664.81  | 30431.5   | 22407.64  | 25161.84  | 27355.66  | 31096.05  | 30810.68  | 54965.12  |
| 71720.55  | 38618.39  | 46600.6   | 26074.32  | 21493.25  | 23532.38  | 25475.42  | 29010.34  | 32092.45  | 54169.96  |

|           |           |           |           |           |           |           |           |           |           |
|-----------|-----------|-----------|-----------|-----------|-----------|-----------|-----------|-----------|-----------|
| LN420.992 | LN420.991 | LN420.992 | LN420.992 |
| 41082.97  | 30408.4   | 27760.99  | 28432.89  | 26525.38  | 39164.05  | 44912.06  | 36301.78  | 41389.67  | 62092.2   |
| 36219.75  | 31073.84  | 27765.11  | 30626.13  | 29299.87  | 39825.2   | 42576.68  | 37674.58  | 43403.23  | 56780.29  |
| 39108.94  | 31572.52  | 27336.94  | 27672.3   | 28049.48  | 38635.78  | 44164.11  | 37454.14  | 43179.31  | 62272.46  |
| 42468.88  | 28553.89  | 31478.78  | 29395.11  | 26409.49  | 39961.49  | 42978.39  | 35397.94  | 42354.92  | 51606.95  |
| 38497.15  | 29896.3   | 29630.55  | 30418.95  | 28537.07  | 36436.96  | 45963.47  | 37790.47  | 39775.66  | 62387.99  |



|           |           |           |           |           |           |           |           |           |           |
|-----------|-----------|-----------|-----------|-----------|-----------|-----------|-----------|-----------|-----------|
| LN420.992 |
| 57371.6   | 48496.09  | 52155.49  | 29383.99  | 41829.15  | 27991     | 35529.75  | 50762.37  | 65457.63  | 35159.45  |
| 62025.14  | 49785.16  | 51602.81  | 24323.95  | 42195.39  | 24960.73  | 32779.41  | 47856.48  | 63365.79  | 37374.66  |
| 60868.42  | 51923.39  | 49915.64  | 30025.3   | 39883.71  | 23829.97  | 38467.12  | 50869.22  | 62377.03  | 34772.58  |
| 64803.94  | 54955.31  | 53555.56  | 28276.65  | 38029.82  | 26178.32  | 34761.78  | 51652.87  | 65363.68  | 33736.35  |
| 56365.83  | 49385.94  | 57110.58  | 25791.14  | 44108.55  | 25463.54  | 35455.27  | 49543.6   | 64374.08  | 35577.82  |

|           |           |           |           |           |           |           |           |           |           |
|-----------|-----------|-----------|-----------|-----------|-----------|-----------|-----------|-----------|-----------|
| LN420.992 |
| 42296.7   | 39226.58  | 22944.3   | 46507.46  | 35658.84  | 24344.09  | 56491.8   | 35289.36  | 37331.34  | 40250.8   |
| 43172.18  | 36367.34  | 23033.56  | 45678.44  | 35644.72  | 22858.84  | 54248.11  | 38039.68  | 35050.14  | 41329.1   |
| 43563.67  | 39581.95  | 24619.34  | 45960.55  | 35205.78  | 23161.82  | 54391.88  | 36675.05  | 38112.47  | 40205.55  |
| 41178.33  | 37913.7   | 22105.01  | 43931.19  | 35141.99  | 19180.26  | 55827.16  | 37567.16  | 37638.38  | 42105.34  |
| 46656.27  | 37307.67  | 24713.52  | 43068.24  | 34958.46  | 23055.15  | 53323.64  | 35148.19  | 35623.03  | 41004.3   |

|           |           |           |           |           |           |           |           |           |           |
|-----------|-----------|-----------|-----------|-----------|-----------|-----------|-----------|-----------|-----------|
| LN420.992 |
| 13887.18  | 18775.45  | 33924.46  | 22109.54  | 66376.68  | 30165.07  | 28121.76  | 43267.11  | 32762.55  | 18240.18  |
| 14301.48  | 18055.99  | 33416.72  | 22478.2   | 61759.14  | 27120.98  | 29650.64  | 46388.4   | 28562.14  | 14303.72  |
| 14681.32  | 21230.07  | 29953.86  | 23203.04  | 61523.74  | 30754.94  | 27841.46  | 44888.68  | 30231.08  | 16195.37  |
| 12190.85  | 18749.91  | 31491.31  | 20699.15  | 63078.14  | 31633.09  | 29538.33  | 43801.45  | 30841.55  | 15312.4   |
| 13539.92  | 19087.48  | 31985.48  | 24916.27  | 59477.03  | 26108.24  | 27913.16  | 45797.86  | 26461.13  | 19545.96  |

|           |           |           |           |           |           |           |           |           |           |
|-----------|-----------|-----------|-----------|-----------|-----------|-----------|-----------|-----------|-----------|
| LN420.992 | LN420.993 |
| 25565.13  | 11890.25  | 42700.91  | 21865.24  | 45503.31  | 34201.59  | 79391.8   | 44605.43  | 32226.23  | 15977.22  |
| 29225.28  | 14941.1   | 39093.91  | 22117.04  | 45703.67  | 34585.71  | 77519.95  | 46561.69  | 28968.57  | 17668.8   |
| 28089.5   | 15838.31  | 43251.13  | 21820.53  | 45590.24  | 37772.29  | 78487.04  | 48372.49  | 23788.36  | 15758.46  |
| 28490.65  | 12338.29  | 42779.98  | 21345.23  | 50840.68  | 41962.43  | 81589.06  | 45842.7   | 28509.29  | 14887.14  |
| 28685.52  | 13922.8   | 38014.03  | 23001.25  | 45902.47  | 34498.29  | 71938.23  | 45365.11  | 26339.63  | 17633.42  |

|           |           |           |           |           |           |           |           |           |           |
|-----------|-----------|-----------|-----------|-----------|-----------|-----------|-----------|-----------|-----------|
| LN420.992 | LN420.992 | LN420.993 |
| 18401.85  | 18177.6   | 20592.53  | 18001.23  | 31228.04  | 34457.75  | 20426.47  | 14246.59  | 21492.19  | 12266.2   |
| 15756.54  | 17800.32  | 17655.22  | 15798.61  | 31680.75  | 34937.87  | 21980.33  | 12983.78  | 19259.9   | 15078.99  |
| 17899.13  | 20464.46  | 18576.5   | 17325.35  | 31908.36  | 34074.2   | 20647.65  | 14524.23  | 18573.61  | 13446.21  |
| 18410.11  | 17184.91  | 19879.17  | 17738.41  | 31639.61  | 34013.38  | 20328.25  | 12380.4   | 18703.84  | 12287.09  |
| 14471.03  | 18862.88  | 19077.23  | 18094.02  | 32112.14  | 34853.56  | 18111.14  | 13338.26  | 16355.96  | 14194.56  |

|           |           |           |           |           |           |           |           |           |           |
|-----------|-----------|-----------|-----------|-----------|-----------|-----------|-----------|-----------|-----------|
| LN420.993 | LN421.027 |
| 15371.26  | 14421.75  | 38634.62  | 26735.22  | 40928.93  | 32105.98  | 25685.33  | 26398.05  | 26193.62  | 53580.51  |
| 16460.66  | 18242.65  | 39677.35  | 24088.69  | 39547.97  | 33013.39  | 25290.35  | 28530.81  | 24825.96  | 52011.87  |
| 16527.42  | 14575.08  | 39903.28  | 22861.86  | 46208.09  | 31547.29  | 26313.17  | 27967.77  | 23759.33  | 56244.29  |
| 15218.94  | 18008.12  | 38895.89  | 27222.14  | 40029.88  | 35665.52  | 23583.18  | 31758.14  | 25560.44  | 57894.21  |
| 14988.78  | 15564.91  | 40240.11  | 26166.85  | 41253.08  | 34047.73  | 24485.38  | 28333.14  | 28584.3   | 58496.64  |

|           |           |           |           |           |           |           |           |           |           |
|-----------|-----------|-----------|-----------|-----------|-----------|-----------|-----------|-----------|-----------|
| LN421.028 | LN421.029 | LN421.245 | LN421.796 | LN422.798 | LN423.006 | LN423.007 | LN423.007 | LN423.007 | LN423.007 |
| 38703.01  | 49246.25  | 19623.95  | 73415.73  | 13618.88  | 105792.7  | 145867.8  | 150395.1  | 173757.7  | 190788.3  |
| 42990.97  | 50058.15  | 19055.36  | 65686.22  | 7214.775  | 121177.5  | 140520.8  | 113487.8  | 127022.7  | 133098.7  |
| 44948.19  | 53958.11  | 17702.23  | 65343.4   | 12019.76  | 99491.08  | 202577.8  | 126308.6  | 117167.7  | 194401    |
| 46104.24  | 49013.7   | 18241.63  | 70763.01  | 13136.21  | 99399.22  | 147526.8  | 101583.5  | 118123.9  | 145056    |
| 46642.51  | 49971.67  | 19123.3   | 76204.4   | 12837.01  | 134084.3  | 130150.1  | 115026.2  | 182808.4  | 155108.1  |

|           |           |           |           |           |           |           |           |           |           |
|-----------|-----------|-----------|-----------|-----------|-----------|-----------|-----------|-----------|-----------|
| LN423.007 |
| 202407.2  | 107778.6  | 57706.2   | 95563.28  | 98189.6   | 60407.86  | 47064.59  | 70752.93  | 108847.8  | 79608.63  |
| 147423.6  | 108983    | 80143.02  | 119870.4  | 153704.4  | 64760.96  | 83256.13  | 66877.83  | 87887.48  | 117958    |
| 121057.1  | 156229.1  | 51681.47  | 68133.65  | 92587.65  | 68447.52  | 69903.73  | 74194.96  | 147008.7  | 93012.07  |
| 88299.05  | 116150    | 59229.44  | 96681.66  | 87595.8   | 53669     | 82895.05  | 45691.06  | 100421.9  | 95836.85  |
| 124377.6  | 164543.6  | 50271.97  | 127994.2  | 76677.53  | 79032.57  | 68733.65  | 78411.77  | 101391.2  | 108524.5  |



|           |           |           |           |           |           |           |           |           |           |
|-----------|-----------|-----------|-----------|-----------|-----------|-----------|-----------|-----------|-----------|
| LN423.007 |
| 64957.54  | 66652.17  | 64954.13  | 85375.32  | 32249.11  | 109567.9  | 162006.5  | 66442.34  | 25156.96  | 130399.6  |
| 51777.53  | 68984.76  | 76912.18  | 98257.71  | 37686.35  | 129810.7  | 104295.5  | 81523.65  | 17998.27  | 113292.8  |
| 52139.9   | 79991.46  | 116545.7  | 64324.48  | 31183.78  | 142852.4  | 117414.1  | 46840.7   | 15995.35  | 88607.69  |
| 103094.2  | 85614.74  | 68928.01  | 72674.27  | 34133.24  | 113187.9  | 117710    | 82761.44  | 15733.02  | 65245.77  |
| 72540.14  | 100099.5  | 68668.01  | 102325.7  | 32462.38  | 167896.8  | 86225.71  | 112541.7  | 20651.23  | 101799    |

|           |           |           |           |           |           |           |           |           |           |
|-----------|-----------|-----------|-----------|-----------|-----------|-----------|-----------|-----------|-----------|
| LN423.007 |
| 100143.7  | 85299.5   | 64421.39  | 79906.32  | 53657.04  | 49149.83  | 49685.81  | 115463.1  | 134226.1  | 99944.73  |
| 101826    | 66724.09  | 79516.99  | 89486.11  | 72275.66  | 67296.42  | 54385.34  | 140700.7  | 117098.3  | 111063.2  |
| 86582     | 78147.66  | 58780.24  | 131246.5  | 54638.77  | 77057.86  | 40295.7   | 96983.18  | 110107.3  | 117033.8  |
| 113885    | 54624.38  | 96603.91  | 95401.65  | 69946.63  | 49130.7   | 63825.56  | 87850.7   | 166118.4  | 93863.41  |
| 67297.73  | 59772.49  | 58769.31  | 84415.64  | 51680.28  | 55819.34  | 33336.91  | 129137.9  | 77627.09  | 68745.81  |

|           |           |           |           |           |           |           |           |           |           |
|-----------|-----------|-----------|-----------|-----------|-----------|-----------|-----------|-----------|-----------|
| LN423.007 |
| 62130.43  | 24366.75  | 43338.12  | 53537.94  | 56322.03  | 109429    | 28113.88  | 59838.48  | 69588.83  | 103074.1  |
| 118184.6  | 37893.56  | 45756.1   | 62550.91  | 51819.52  | 154994.9  | 46712.36  | 72164.59  | 57719.34  | 167274.8  |
| 88131.95  | 37700.86  | 56984.14  | 72300.63  | 43732.72  | 106561.5  | 39083.8   | 72932.21  | 79992.91  | 103139.5  |
| 98530.95  | 36724.89  | 29512.87  | 47684.3   | 71395.05  | 108030.7  | 35413.71  | 48218.93  | 66236.42  | 169608.1  |
| 95733.5   | 28550.31  | 43126.25  | 56838.8   | 72528.82  | 99428.48  | 33035.4   | 63594.21  | 57728.82  | 153661.6  |

|           |           |           |           |           |           |           |           |           |           |
|-----------|-----------|-----------|-----------|-----------|-----------|-----------|-----------|-----------|-----------|
| LN423.007 |
| 30009.41  | 64033.49  | 80475.8   | 63838.18  | 128773.5  | 51140.62  | 55658.11  | 96548.84  | 54981.53  | 69090.81  |
| 26635.11  | 52121.39  | 83635.96  | 52857.69  | 88140.13  | 33545.58  | 52697.75  | 111405.6  | 57635.33  | 78627.4   |
| 27620.64  | 53934.7   | 58017.04  | 60100.98  | 88125.77  | 37778.61  | 53431.98  | 112685.6  | 39053.21  | 84083.55  |
| 32916.58  | 46340.06  | 61052.94  | 62669.54  | 108565.7  | 41399.07  | 50972.09  | 97217.4   | 61931.58  | 114668.9  |
| 30885.33  | 69272.86  | 57194.79  | 53808.75  | 96506.44  | 29647.77  | 70655.14  | 87132.82  | 39825.07  | 82763.55  |

|           |           |           |           |           |           |           |           |           |           |
|-----------|-----------|-----------|-----------|-----------|-----------|-----------|-----------|-----------|-----------|
| LN423.007 |
| 65657.09  | 77117.91  | 103668.7  | 78897.73  | 58350.48  | 23901.94  | 65143.99  | 74978.92  | 127322.1  | 90945.63  |
| 47811.41  | 60317.74  | 105726.2  | 70655.54  | 63692.37  | 33790.09  | 70145.72  | 67876.49  | 93636.39  | 119852    |
| 63645.5   | 92396.14  | 109867.1  | 81102.57  | 61496.51  | 32092.94  | 58646.92  | 107207.7  | 83051.41  | 130240.5  |
| 48276.7   | 97304.41  | 106012.5  | 89594.39  | 45547.46  | 24301.05  | 64458.26  | 85671.24  | 98139.6   | 90538.08  |
| 66942.42  | 62725.06  | 82596.32  | 75289.99  | 87500.79  | 26834.45  | 50208.97  | 74115.78  | 106691.6  | 115389    |

|           |           |           |           |           |           |           |           |           |           |
|-----------|-----------|-----------|-----------|-----------|-----------|-----------|-----------|-----------|-----------|
| LN423.007 |
| 127268    | 23288.16  | 61452.93  | 31646.26  | 75476.25  | 56352.28  | 76850.98  | 41227.22  | 35828.67  | 86046.19  |
| 101364.1  | 21725.75  | 61352.78  | 41056.52  | 131789.4  | 53427.64  | 82426.17  | 44684.84  | 69020.7   | 69400.69  |
| 82458.56  | 29762.19  | 69527.91  | 36685.76  | 88950.4   | 73004.96  | 94742.67  | 46737.73  | 58460.23  | 55885.71  |
| 111717.9  | 22496.45  | 49274.47  | 42085.79  | 109021.5  | 56988.22  | 63726.66  | 36666.56  | 54108.21  | 69586.97  |
| 95156.61  | 29402.69  | 54194.78  | 31994.31  | 93860.62  | 52291.52  | 71976.12  | 64307.3   | 50899.26  | 67460.66  |

|           |           |           |           |           |           |           |           |           |           |
|-----------|-----------|-----------|-----------|-----------|-----------|-----------|-----------|-----------|-----------|
| LN423.007 | LN423.007 | LN423.007 | LN423.007 | LN423.007 | LN423.188 | LN423.223 | LN423.224 | LN423.223 | LN423.223 |
| 89690.87  | 103194.3  | 60973.06  | 110678.2  | 51148.24  | 26153.41  | 27255.73  | 27850.22  | 34571.22  | 37137.24  |
| 53154.23  | 93860.08  | 54270.57  | 72627.8   | 57726.29  | 28789.3   | 30598.04  | 34758.12  | 28075.15  | 40142.66  |
| 51240.53  | 88453.31  | 51320.9   | 85917.75  | 67980.23  | 25159.96  | 24558.87  | 30348.43  | 30851.14  | 35221.39  |
| 48845.08  | 83960.68  | 55475.43  | 93601.01  | 56730.18  | 24986.31  | 28702.99  | 31982.03  | 32412.08  | 40231.35  |
| 53542.3   | 70464.65  | 77588.02  | 86357.09  | 69049.16  | 24679.57  | 27548.07  | 29232.94  | 31693.42  | 40607.13  |

|           |           |           |           |           |           |           |           |           |           |
|-----------|-----------|-----------|-----------|-----------|-----------|-----------|-----------|-----------|-----------|
| LN423.223 | LN423.223 | LN423.223 | LN423.797 | LN423.835 | LN424.832 | LN426.850 | LN426.850 | LN426.850 | LN426.922 |
| 29493.87  | 34107.54  | 34794.51  | 20453.15  | 18967     | 19655.99  | 36796.57  | 22539.65  | 24635.85  | 59643.06  |
| 30984.29  | 33756.25  | 33638.24  | 17664.51  | 16896.44  | 18147.52  | 39099.68  | 23878.86  | 24773.33  | 60422.57  |
| 27139.27  | 34353     | 32697.52  | 17034.05  | 18144.87  | 14536.32  | 37939.2   | 20156.49  | 21696.32  | 55823.78  |
| 28429.4   | 34441.07  | 35731.92  | 18220.42  | 14024.98  | 18169.85  | 34464.09  | 25767.5   | 20896.77  | 58709.07  |
| 29081.84  | 35169.8   | 39436.53  | 19342.95  | 20702.56  | 22961.24  | 34986.16  | 21346.45  | 20675.08  | 52724.93  |



|           |           |           |           |           |           |           |           |           |           |
|-----------|-----------|-----------|-----------|-----------|-----------|-----------|-----------|-----------|-----------|
| LN426.923 | LN426.982 | LN427.215 | LN429.037 | LN429.037 | LN429.037 | LN429.037 | LN429.037 | LN429.194 | LN430.197 |
| 67663.37  | 53324.35  | 9518.078  | 53094.12  | 39858.62  | 41795.59  | 30027.87  | 47409.56  | 111809    | 21774.18  |
| 66766.63  | 54448.34  | 8683.007  | 51834.79  | 46183.82  | 41567.71  | 30977.63  | 47132.55  | 121437.1  | 22208.45  |
| 63459.71  | 56468.4   | 11352.33  | 54361.44  | 43386.49  | 37646.43  | 29119.3   | 42737.38  | 125025.4  | 19644.5   |
| 69997.65  | 53472.37  | 11231.82  | 51627.95  | 38131.72  | 40407.51  | 29270.55  | 49735.62  | 117387.8  | 21150.08  |
| 65669.03  | 52786.26  | 13363.45  | 49748.78  | 44250.56  | 39171.73  | 31722.79  | 41607.78  | 99510.11  | 17480.52  |

|           |           |           |           |           |           |           |           |           |           |
|-----------|-----------|-----------|-----------|-----------|-----------|-----------|-----------|-----------|-----------|
| LN430.861 | LN430.995 | LN430.994 | LN430.995 |
| 29461.75  | 27534.74  | 52735.62  | 22384.94  | 26166.86  | 31738.92  | 43515.56  | 34127.13  | 44356.05  | 27954.41  |
| 31320.89  | 32702.15  | 51004.78  | 18966.22  | 25121.77  | 28909.26  | 39121.86  | 34285.67  | 39438.65  | 28012.94  |
| 33144.88  | 32320.78  | 57834.79  | 20456.19  | 24758.46  | 27948.33  | 41486.43  | 32323.77  | 40294.4   | 27234.86  |
| 26562.71  | 31760.43  | 56797.8   | 17847.76  | 22309.98  | 28710.96  | 40085.9   | 34183.67  | 39835.77  | 25871.95  |
| 28861.2   | 31928.45  | 55436.7   | 17832.85  | 23295.69  | 27099.82  | 39466.93  | 31463.6   | 39477.76  | 27750.5   |

|           |           |           |           |           |           |           |           |           |           |
|-----------|-----------|-----------|-----------|-----------|-----------|-----------|-----------|-----------|-----------|
| LN430.994 | LN430.995 | LN430.995 | LN430.995 | LN430.995 | LN430.994 | LN430.995 | LN430.995 | LN430.995 | LN430.995 |
| 48713.96  | 17340.24  | 29447.31  | 23072.38  | 19891.06  | 59191.74  | 49470.48  | 28674.56  | 42835.21  | 37844.2   |
| 45380.5   | 17085.57  | 25801.71  | 21247.43  | 20101.55  | 59973.3   | 50692.46  | 31117.36  | 45333.12  | 35797.03  |
| 47842.82  | 17436.7   | 29550.07  | 19583.51  | 20517.69  | 52886.39  | 49339.72  | 28257.31  | 43350.42  | 36495.43  |
| 49341.6   | 17029.19  | 26634.82  | 19798.93  | 18631.35  | 60458.84  | 51575.58  | 28927.39  | 38362.95  | 35313.28  |
| 47626.28  | 17402.53  | 25429.46  | 22950.03  | 19387     | 53040.84  | 51329.16  | 26676.45  | 41243.89  | 37038.14  |

|           |           |           |           |           |           |           |           |           |           |
|-----------|-----------|-----------|-----------|-----------|-----------|-----------|-----------|-----------|-----------|
| LN430.995 | LN430.994 | LN430.994 | LN430.995 |
| 67078.67  | 53648.7   | 47430.73  | 14584.35  | 20327.91  | 32591.55  | 32463.2   | 57202.02  | 29049.69  | 27258.21  |
| 57140.8   | 46973.28  | 45145.29  | 12583.2   | 19421.87  | 30581.16  | 30014.6   | 58797.57  | 29537.07  | 22056.21  |
| 64639.18  | 48277.44  | 42046.76  | 14194.38  | 22548.98  | 31468.57  | 32023.19  | 60080.42  | 27385.48  | 24729.73  |
| 58989.08  | 48473.31  | 51552.06  | 14157.08  | 20213.26  | 33994.16  | 32050.45  | 58029.21  | 25810.37  | 25871.35  |
| 59550.65  | 50602.26  | 49858.08  | 13010     | 18638.06  | 30136.8   | 31923.61  | 57532.89  | 27629.2   | 26789.48  |

|           |           |           |           |           |           |           |           |           |           |
|-----------|-----------|-----------|-----------|-----------|-----------|-----------|-----------|-----------|-----------|
| LN430.995 | LN430.995 | LN430.995 | LN430.995 | LN430.995 | LN430.995 | LN430.994 | LN430.995 | LN430.995 | LN430.995 |
| 48676.42  | 56367.89  | 19628.84  | 19789.25  | 21906     | 34767.52  | 39297.36  | 30196.91  | 34938.93  | 22205.97  |
| 53496.01  | 51496.31  | 17867.27  | 19674.27  | 22554.69  | 32181.61  | 41937.12  | 32554.18  | 31467.91  | 22147.61  |
| 52536.18  | 49373.16  | 18371.14  | 22605.69  | 21883.59  | 31647.09  | 40635.5   | 32383.18  | 33925.88  | 22345.51  |
| 50246     | 52639.85  | 17916.43  | 20299.24  | 22307.31  | 30351.96  | 41912.92  | 30002.98  | 34105.75  | 19934.21  |
| 49435.69  | 57298.22  | 17822.88  | 23444.03  | 22318.99  | 32564.69  | 41472.31  | 30739.52  | 28323.79  | 21682.49  |

|           |           |           |           |           |           |           |           |           |           |
|-----------|-----------|-----------|-----------|-----------|-----------|-----------|-----------|-----------|-----------|
| LN430.994 | LN430.995 |
| 55032.4   | 27512.24  | 29796.67  | 55108.77  | 31261.02  | 36418.69  | 18153.12  | 26079.33  | 32373.3   | 42201.44  |
| 59784.83  | 29498.78  | 27711.94  | 59100.33  | 27457.26  | 36304.71  | 16249.48  | 25253.94  | 32114.46  | 44184.13  |
| 60470.8   | 27447.43  | 27294.87  | 54588.84  | 30879.7   | 40016.08  | 16410.13  | 26355.54  | 31222.17  | 47589.23  |
| 57540.1   | 29299.94  | 28605.67  | 59350.68  | 28869.69  | 35382.23  | 16479.4   | 23397.98  | 31133.57  | 40426.79  |
| 60747.56  | 28552.84  | 28301.8   | 53663.14  | 28909.3   | 32448.64  | 16334.24  | 23168.11  | 30317.07  | 43210.54  |

|           |           |           |           |           |           |           |           |           |           |
|-----------|-----------|-----------|-----------|-----------|-----------|-----------|-----------|-----------|-----------|
| LN430.996 | LN430.995 | LN430.995 | LN430.995 | LN430.995 | LN430.995 | LN430.994 | LN430.995 | LN430.995 | LN430.995 |
| 15821.99  | 16017.96  | 44562.88  | 31452.73  | 35186.39  | 58358     | 87091.16  | 34907.49  | 42454.8   | 26663.46  |
| 15763.85  | 14732.51  | 39020.73  | 26613.9   | 36667.19  | 57808.89  | 84030.3   | 31381.62  | 38197.97  | 26487.84  |
| 14796.45  | 15889.91  | 42429.81  | 30081.31  | 35125.34  | 55109.42  | 85705.19  | 35705.35  | 38826.8   | 27731.64  |
| 15808.33  | 14796.43  | 46498.35  | 31049.38  | 35948.48  | 55718     | 84775.07  | 37265.15  | 40724.33  | 25292.33  |
| 13606.09  | 15034.41  | 40470.64  | 32066.75  | 36218.61  | 58833.55  | 84494.8   | 33872.29  | 42167.88  | 26043.54  |

|           |           |           |           |           |           |           |           |           |           |
|-----------|-----------|-----------|-----------|-----------|-----------|-----------|-----------|-----------|-----------|
| LN430.995 |
| 49266.46  | 30381.57  | 26951.12  | 49978.72  | 28991.96  | 22424.9   | 19187.81  | 55175.12  | 31738.42  | 39281.19  |
| 47735.25  | 30528.1   | 25599.31  | 46260.76  | 29390.41  | 20455.42  | 18231.41  | 55003.6   | 32723.81  | 38613.69  |
| 47925.1   | 28013.55  | 24412.91  | 47130.78  | 28705.07  | 21920.21  | 20304.75  | 55386.37  | 35799     | 42607.29  |
| 44390.59  | 24538.73  | 25750.93  | 50246.49  | 29874.23  | 21264.88  | 15303.43  | 51798.09  | 30977.44  | 36167.27  |
| 45460.32  | 30764.07  | 26392.13  | 45411.07  | 26586.93  | 22555.61  | 18411.97  | 57689.65  | 33554.8   | 36882.15  |



|           |           |           |           |           |           |           |           |           |           |
|-----------|-----------|-----------|-----------|-----------|-----------|-----------|-----------|-----------|-----------|
| LN430.995 |
| 21735.64  | 24277.28  | 23181.53  | 54802.31  | 23910.9   | 21068.93  | 35390.1   | 37158.9   | 45170.74  | 20518.4   |
| 22299.76  | 23739.33  | 21656.89  | 54654.72  | 20988.21  | 24529.3   | 34162.45  | 29315.09  | 41218.64  | 20383.21  |
| 19497.99  | 23688.18  | 24496.74  | 55157.88  | 22433.94  | 23010.02  | 34332.18  | 33951.85  | 42614.36  | 20561.99  |
| 22220.27  | 23631.2   | 21770.61  | 51644.33  | 22486.58  | 22549.56  | 41324.19  | 29112.43  | 42458.6   | 19618.68  |
| 20035.99  | 22580.87  | 22576.66  | 53429.55  | 20155.49  | 22282.99  | 34960.79  | 33422.55  | 41143.81  | 18306.37  |

|           |           |           |           |           |           |           |           |           |           |
|-----------|-----------|-----------|-----------|-----------|-----------|-----------|-----------|-----------|-----------|
| LN430.995 | LN430.996 | LN430.995 | LN430.995 | LN430.995 | LN431.168 | LN431.168 | LN431.168 | LN431.169 | LN431.168 |
| 24248.52  | 13009.05  | 52002.63  | 32457.34  | 50443.91  | 22449.91  | 16346.9   | 24989.05  | 25808.05  | 23285.01  |
| 26039.3   | 13314.53  | 48842.36  | 28695.06  | 55853.5   | 22344.74  | 17583.64  | 26729.13  | 24279.12  | 28837.77  |
| 24272.3   | 13348.75  | 48804.89  | 32482.32  | 49076.02  | 22510.25  | 19354.02  | 23777.24  | 24259.1   | 24732.34  |
| 24509.03  | 13656.87  | 56866.97  | 29313.22  | 53692.32  | 22765.71  | 16964.15  | 27082.52  | 23041.49  | 23295.76  |
| 25210.16  | 12948.53  | 48948.6   | 29823.34  | 51964.02  | 18772.41  | 15891.77  | 23143.75  | 26069.46  | 24398.84  |

|           |           |           |           |           |           |           |           |           |           |
|-----------|-----------|-----------|-----------|-----------|-----------|-----------|-----------|-----------|-----------|
| LN431.168 | LN431.194 | LN432.464 | LN432.991 | LN432.991 | LN432.991 | LN432.992 | LN432.992 | LN432.991 | LN432.991 |
| 24891.4   | 48156.14  | 33641.46  | 42904.66  | 56671.67  | 53140.81  | 46674.73  | 53366.85  | 52013.66  | 53159.16  |
| 23776.81  | 62272.78  | 30352.64  | 49888.03  | 77299.24  | 54372.08  | 50292.43  | 57614.02  | 63302.11  | 37973.38  |
| 25553.47  | 46725.45  | 34897.94  | 34716.81  | 55724.4   | 50719.19  | 49095.16  | 68805.47  | 66502.19  | 66624.04  |
| 26587.64  | 51534.38  | 28720.91  | 48385.94  | 43088.37  | 36770.51  | 42811.38  | 46702.58  | 51778.3   | 67091.18  |
| 25812.47  | 52259.01  | 24967.04  | 41397.6   | 44698.97  | 60455.85  | 45245.95  | 52934.59  | 58574.92  | 42750.64  |

|           |           |           |           |           |           |           |           |           |           |
|-----------|-----------|-----------|-----------|-----------|-----------|-----------|-----------|-----------|-----------|
| LN432.991 | LN432.992 | LN432.991 | LN432.992 | LN432.992 | LN432.992 | LN432.991 | LN432.991 | LN432.991 | LN432.991 |
| 71476.31  | 26649.66  | 59373.78  | 35413.16  | 35907.36  | 21999.98  | 75403.71  | 13739.65  | 50379.68  | 48490.65  |
| 68402.87  | 24278.29  | 102685.4  | 23881.02  | 43642.98  | 18057.06  | 71488.91  | 12713.6   | 45290.05  | 56753.31  |
| 110720.1  | 26100.14  | 55341.76  | 36987.46  | 41611.65  | 23563.45  | 46546.3   | 14803.14  | 48964.4   | 42001.22  |
| 77104.89  | 31661.76  | 59657.36  | 28330.95  | 43090.25  | 28921.72  | 78805.33  | 11808.77  | 42398.03  | 49811.66  |
| 90261.59  | 41886.93  | 75210.49  | 40180.01  | 47942.22  | 23213.3   | 75608.45  | 15412.72  | 39012.82  | 59646.35  |

|           |           |           |           |           |           |           |           |           |           |
|-----------|-----------|-----------|-----------|-----------|-----------|-----------|-----------|-----------|-----------|
| LN432.991 | LN432.992 | LN432.991 | LN432.991 | LN432.992 | LN432.992 | LN432.992 | LN432.991 | LN432.992 | LN432.992 |
| 70905.91  | 43654.3   | 71271.04  | 53238.42  | 40094.74  | 43223.65  | 27639.11  | 48664.48  | 29997.15  | 33998.39  |
| 70849.42  | 39730.67  | 78721.12  | 58493.79  | 39390.43  | 39868.52  | 26439.9   | 46259.18  | 36657.59  | 23275.13  |
| 62354.34  | 46610.22  | 69552.3   | 60610.71  | 39352.95  | 43533.84  | 29020.54  | 50240.93  | 37130.77  | 36914.87  |
| 51131.71  | 46370.28  | 72445.98  | 50866.79  | 31220.86  | 39369.89  | 30141.58  | 54399.7   | 26093.9   | 38245.28  |
| 72097.32  | 59178.8   | 55189.74  | 53877.21  | 48948.22  | 66747.41  | 31444.36  | 51389.55  | 35321.72  | 34718.29  |

|           |           |           |           |           |           |           |           |           |           |
|-----------|-----------|-----------|-----------|-----------|-----------|-----------|-----------|-----------|-----------|
| LN432.991 | LN432.992 | LN432.991 | LN432.992 | LN432.992 | LN432.991 | LN432.991 | LN432.992 | LN432.991 | LN432.992 |
| 48779.29  | 32849.28  | 57933.83  | 29258.54  | 45718.62  | 58728.32  | 36919.02  | 37384.79  | 50208.05  | 31176.8   |
| 59966.59  | 39486.74  | 64197.52  | 30898.39  | 46643.77  | 55321.64  | 38962.24  | 30483.69  | 54169.41  | 43091.62  |
| 49170.58  | 31215.74  | 65011.89  | 30014.21  | 46942.37  | 53126.6   | 38084.41  | 38021.24  | 39747.88  | 32566.52  |
| 56874.01  | 31110.08  | 70186.44  | 29465.27  | 37135.22  | 46951.76  | 42940.68  | 44206.38  | 47919.4   | 29801.04  |
| 43749.92  | 38712.86  | 54535.51  | 32878.74  | 42695.87  | 72005.85  | 35910.2   | 37147.42  | 64048.16  | 36053.13  |

|           |           |           |           |           |           |           |           |           |           |
|-----------|-----------|-----------|-----------|-----------|-----------|-----------|-----------|-----------|-----------|
| LN432.992 | LN432.992 | LN432.992 | LN432.991 | LN432.992 | LN432.992 | LN432.992 | LN432.991 | LN432.991 | LN432.991 |
| 40602.52  | 36256.95  | 26948.88  | 73105.72  | 39745.27  | 20511.79  | 36281.52  | 32329.79  | 51042.77  | 52657.45  |
| 44013.72  | 36518.45  | 25944.37  | 68469.22  | 40216.5   | 17370.82  | 29435.33  | 35447.79  | 67034.07  | 50641.31  |
| 29784.7   | 38889.4   | 47626.5   | 83148.33  | 45324.43  | 21531.66  | 26234.79  | 31857.54  | 50539.1   | 61171.79  |
| 42819.57  | 36802.72  | 38337.11  | 61191.24  | 35594.4   | 13840.9   | 23725.95  | 38526.38  | 63089.19  | 47320.45  |
| 48590.14  | 43181.47  | 23126.58  | 65874.04  | 54933.75  | 22101.77  | 41121.01  | 29264.58  | 48236.04  | 48741.51  |

|           |           |           |           |           |           |           |           |           |           |
|-----------|-----------|-----------|-----------|-----------|-----------|-----------|-----------|-----------|-----------|
| LN432.992 |
| 26167.96  | 34625.82  | 33327.18  | 21359.32  | 32076.15  | 51630.24  | 19947.07  | 31878.84  | 19473.5   | 38291.67  |
| 29237.31  | 27527.57  | 34846.87  | 16673.53  | 27979.07  | 48894.25  | 18643.15  | 34695.76  | 15528.3   | 38222.58  |
| 31371.32  | 34710.58  | 32919.16  | 20861.93  | 32156.33  | 55304.98  | 19534.01  | 35114.92  | 23301.28  | 43340.57  |
| 25114.15  | 32363.63  | 35057.07  | 18367.71  | 27281.39  | 40178.34  | 18060.55  | 30170.26  | 18896.17  | 37014.87  |
| 24253.65  | 31191.19  | 30781.32  | 17078.15  | 34410.11  | 53552.25  | 15535.09  | 34064.91  | 32948.86  | 37888.9   |



|           |           |           |           |           |           |           |           |           |           |
|-----------|-----------|-----------|-----------|-----------|-----------|-----------|-----------|-----------|-----------|
| LN432.992 | LN432.991 | LN432.992 | LN432.991 | LN432.992 | LN432.992 | LN432.991 | LN432.992 | LN432.991 | LN432.992 |
| 40333.49  | 36092.04  | 38749.86  | 51688.3   | 28236.72  | 34783.6   | 47838.42  | 29636.88  | 38452.88  | 34917.02  |
| 55515.11  | 41291.66  | 35413.82  | 48118.46  | 22455.77  | 36366.65  | 43784.41  | 33203.41  | 46843.41  | 42649.63  |
| 43713.11  | 43099.06  | 35477.9   | 54006.15  | 23276.19  | 45570.53  | 48537.91  | 23387.49  | 39828.96  | 46960.63  |
| 39643.83  | 34110.63  | 31169.7   | 66704.72  | 23488.94  | 47953.28  | 46410.26  | 36821.5   | 37812.14  | 43732.02  |
| 50077.53  | 37327.23  | 42547.04  | 55804.37  | 24447.75  | 30221.07  | 53145.82  | 26727.67  | 40142.05  | 46823.12  |

|           |           |           |           |           |           |           |           |           |           |
|-----------|-----------|-----------|-----------|-----------|-----------|-----------|-----------|-----------|-----------|
| LN432.992 | LN432.991 | LN432.992 |
| 36629.84  | 52842.19  | 26940.67  | 42381.72  | 26183.14  | 17045.39  | 35627.58  | 19666.82  | 45155.86  | 20378.07  |
| 37792.62  | 68058.09  | 23638.82  | 45994.24  | 45753.61  | 19946.84  | 43232.1   | 27958.64  | 50967.93  | 19894.19  |
| 47214.34  | 53729.97  | 35694.49  | 56935.85  | 38515.03  | 19552.08  | 39227.74  | 26578.72  | 49267.06  | 29305.81  |
| 34367.05  | 48585.86  | 24832.7   | 42332.46  | 28611.26  | 14713.31  | 27787.49  | 24140.86  | 39350.73  | 27928.28  |
| 33461.37  | 40763.77  | 18273.44  | 59127.09  | 27475.25  | 14143.55  | 53625.48  | 19931.42  | 36845.45  | 16522.84  |

|           |           |           |           |           |           |           |           |           |           |
|-----------|-----------|-----------|-----------|-----------|-----------|-----------|-----------|-----------|-----------|
| LN432.992 | LN432.992 | LN432.992 | LN432.992 | LN432.992 | LN432.993 | LN432.993 | LN432.993 | LN432.993 | LN432.993 |
| 19541.63  | 27750.49  | 49490.29  | 20984.6   | 34169.26  | 18543     | 48129.88  | 30037.62  | 44890.96  | 36027.33  |
| 17408.93  | 33170.15  | 50003.99  | 18881.07  | 31120.18  | 16419.16  | 51467.44  | 30947.58  | 48326.27  | 35625.39  |
| 21242.45  | 35968.41  | 43904.45  | 29889.94  | 42179.27  | 18281.39  | 50448.13  | 31493.19  | 46688.02  | 39330.8   |
| 17121.49  | 33284.97  | 64458.67  | 13538.72  | 31164.54  | 16135.36  | 46673.58  | 29818.93  | 45368.44  | 35500.45  |
| 20231.27  | 36190.82  | 43015.34  | 19704.17  | 31572.44  | 16314.04  | 51299.06  | 28293.37  | 43468.39  | 37062.86  |

|           |           |           |           |           |           |           |           |           |           |
|-----------|-----------|-----------|-----------|-----------|-----------|-----------|-----------|-----------|-----------|
| LN432.993 | LN432.993 | LN432.993 | LN432.993 | LN433.010 | LN433.010 | LN433.047 | LN433.047 | LN433.047 | LN433.190 |
| 20818.87  | 42060.89  | 27445.86  | 24114.34  | 64623.42  | 73506.5   | 69339.78  | 63484.14  | 78217.74  | 15472.82  |
| 22805.78  | 36368.35  | 26864.91  | 22355.46  | 68895.11  | 74448.58  | 77904.66  | 66008.33  | 81350.33  | 15341.09  |
| 22252.96  | 39463.77  | 25036.51  | 24134.76  | 74325.53  | 78500.59  | 69430.28  | 67494.19  | 85870.25  | 13069.73  |
| 20867.23  | 40096.29  | 25955.11  | 25495.11  | 70053.28  | 66223.23  | 76944.87  | 68560.78  | 83960.16  | 16076.02  |
| 24781.34  | 36633.86  | 24650.96  | 22034.13  | 67334.02  | 73705.14  | 72561.5   | 68035.72  | 86967     | 16879.13  |

|           |           |           |           |           |           |           |           |           |           |
|-----------|-----------|-----------|-----------|-----------|-----------|-----------|-----------|-----------|-----------|
| LN433.207 | LN433.208 |
| 21525.39  | 22879.31  | 32621.42  | 31815.6   | 25944.42  | 18462.79  | 20185.37  | 22135.66  | 27642.34  | 22107.33  |
| 23699.5   | 22851.59  | 26786.85  | 30822.03  | 36964.08  | 27049.57  | 21781.88  | 20866.46  | 27075.46  | 25763.94  |
| 22007.41  | 24030.33  | 23060.84  | 29778.42  | 39501.08  | 30181.44  | 22419.19  | 23115.03  | 30087.64  | 21936.68  |
| 22530.35  | 21877.28  | 26315.3   | 28627.07  | 39458.19  | 24178.74  | 23415.55  | 20235.54  | 28032.65  | 25264.16  |
| 25021.37  | 20056.94  | 24386.08  | 28402.29  | 39091.27  | 27271.83  | 21582.65  | 21902.62  | 27402.12  | 22925.93  |

|           |           |           |           |           |           |           |           |           |           |
|-----------|-----------|-----------|-----------|-----------|-----------|-----------|-----------|-----------|-----------|
| LN433.208 | LN433.208 | LN433.243 | LN434.804 | LN435.006 | LN435.006 | LN435.007 | LN435.006 | LN435.007 | LN435.007 |
| 23015.03  | 30087.31  | 26444.54  | 33845.74  | 39570.99  | 62472.98  | 63629.49  | 72368.89  | 71501.25  | 69590.04  |
| 24342.06  | 31899.38  | 29384.14  | 22881.64  | 41738.82  | 62607.85  | 58170.69  | 73522.33  | 69413.3   | 68481.19  |
| 26136.65  | 33348.04  | 27270.63  | 32112.87  | 45293.81  | 88315.79  | 71276.71  | 101412    | 62080.19  | 69679.04  |
| 22945.55  | 30619.32  | 25955.27  | 32796.11  | 43749.8   | 66451.57  | 57674.19  | 76469.5   | 67982.29  | 69027.38  |
| 21935.11  | 32566.13  | 27075.87  | 32836.3   | 44243.85  | 81872     | 84902.19  | 110315.8  | 66082.16  | 102776.6  |

|           |           |           |           |           |           |           |           |           |           |
|-----------|-----------|-----------|-----------|-----------|-----------|-----------|-----------|-----------|-----------|
| LN435.007 |
| 44215.57  | 61552.5   | 42319.56  | 13352.13  | 44855.05  | 34566.22  | 33858.43  | 45460.71  | 32724.82  | 42342.6   |
| 42085.64  | 59161.79  | 40743.21  | 12957.8   | 46513.6   | 38560.05  | 35379.65  | 41725.94  | 32322.01  | 42798.09  |
| 52504.28  | 81820.48  | 48288.15  | 15882.61  | 41993.24  | 32659.76  | 32556.01  | 46017.04  | 21530.39  | 37764.87  |
| 46714.11  | 57491.45  | 43275.98  | 14553.75  | 50268.35  | 36377.25  | 38252.03  | 42411.98  | 34180.02  | 46044.51  |
| 54186.84  | 66342.41  | 47896.38  | 15554.41  | 40632.05  | 46684.56  | 42387.38  | 39928.08  | 34683.03  | 50748.99  |

|           |           |           |           |           |           |           |           |           |           |
|-----------|-----------|-----------|-----------|-----------|-----------|-----------|-----------|-----------|-----------|
| LN435.007 |
| 30774.84  | 45866.74  | 43328.24  | 22143.22  | 51162.75  | 29300.75  | 62534.14  | 46237.96  | 33177.26  | 40600.34  |
| 32895.09  | 48676.57  | 46635.04  | 22041.06  | 54678.06  | 31234.25  | 63995.83  | 44036.28  | 35015.96  | 38279.9   |
| 45170.01  | 58835.94  | 54118.15  | 27414.92  | 65174.39  | 45722.98  | 51853.11  | 59636.62  | 51925.22  | 41602.07  |
| 28935.18  | 42553.11  | 46565.88  | 22937.55  | 47191.07  | 28012.64  | 59629.48  | 43469.77  | 34055.75  | 39625.66  |
| 44731.68  | 46673.91  | 49039.31  | 24284.95  | 47338.95  | 34685.94  | 44803.21  | 47785.29  | 30903.11  | 45927.79  |



|           |           |           |           |           |           |           |           |           |           |
|-----------|-----------|-----------|-----------|-----------|-----------|-----------|-----------|-----------|-----------|
| LN435.007 | LN435.008 |
| 48741.06  | 29938.52  | 26295.86  | 19306.14  | 23108.43  | 34515.83  | 21979.4   | 35442.56  | 51658.37  | 17528.25  |
| 46605.85  | 30612.05  | 24751.02  | 22018.2   | 22704.74  | 36526.32  | 20246.26  | 33510.17  | 51673.59  | 18318.49  |
| 56723.67  | 26340.01  | 43265.29  | 22364.67  | 26382.54  | 26422.18  | 35745.85  | 31455.26  | 93912.62  | 16604.85  |
| 47466.13  | 30431.45  | 32247.03  | 23587.78  | 26273.95  | 32156.44  | 21353.21  | 34407.59  | 53235.31  | 21009.81  |
| 50300.2   | 38479.1   | 28543.2   | 20651     | 23689.84  | 35956.05  | 25212.21  | 58129.56  | 57782.47  | 17759.06  |

|           |           |           |           |           |           |           |           |           |           |
|-----------|-----------|-----------|-----------|-----------|-----------|-----------|-----------|-----------|-----------|
| LN435.007 |
| 53987.9   | 54243.43  | 31322.21  | 54243.86  | 35490.83  | 19698.88  | 35807.47  | 31722.83  | 22068.41  | 62649.63  |
| 54422.96  | 57556.86  | 30244.75  | 52637.31  | 36217.49  | 21134.52  | 37718.07  | 36131.76  | 22166.01  | 64603.09  |
| 37651.17  | 61534.99  | 43941.06  | 57051.38  | 31141.37  | 14827.52  | 50033.78  | 40741.84  | 21172.4   | 57220.77  |
| 48768.48  | 55655.53  | 34755.93  | 51470.94  | 42099.45  | 19390.16  | 31231.82  | 33400.54  | 23853.23  | 61101.11  |
| 59812.42  | 56343.64  | 29761.01  | 38966.66  | 26425.85  | 22077.03  | 39800.33  | 31748.04  | 17773.61  | 43771.14  |

|           |           |           |           |           |           |           |           |           |           |
|-----------|-----------|-----------|-----------|-----------|-----------|-----------|-----------|-----------|-----------|
| LN435.007 | LN435.008 | LN435.007 | LN435.007 |
| 37378.06  | 25890.71  | 54294.35  | 27033.43  | 19801.17  | 53021.18  | 35563.31  | 18620.65  | 28807.81  | 40195.21  |
| 35929.92  | 27875.37  | 49522.71  | 27476.07  | 21139.29  | 46542.5   | 34255.94  | 17326.16  | 28634.61  | 43256.47  |
| 52651.26  | 36714.72  | 55358.63  | 34872.68  | 18983.72  | 49233.93  | 37599.13  | 18519.73  | 28153.56  | 46332.11  |
| 35195.24  | 26215.61  | 53478.87  | 28741.15  | 21452.44  | 49376.28  | 36900.12  | 15868.06  | 26352.62  | 39746.01  |
| 39591.49  | 22485.34  | 61107.17  | 28533.98  | 24255.68  | 69498.14  | 38028.53  | 21781.7   | 27848.46  | 56524.88  |

|           |           |           |           |           |           |           |           |           |           |
|-----------|-----------|-----------|-----------|-----------|-----------|-----------|-----------|-----------|-----------|
| LN435.007 |
| 49987.53  | 30582.56  | 45912.71  | 42365.37  | 34011.81  | 43839.08  | 39098.46  | 39095.1   | 30001.52  | 27749.8   |
| 52434.31  | 33310.54  | 46379.87  | 43113.4   | 33951.27  | 43172.97  | 42739.72  | 35938.58  | 29723.61  | 32143.12  |
| 56919.8   | 31156.76  | 42805.56  | 57002.72  | 25888     | 40551.35  | 60597.91  | 45233.14  | 29114.68  | 27286.36  |
| 48778.95  | 33165.17  | 49319.18  | 38189.6   | 34615.74  | 41670.71  | 42471.63  | 38559.27  | 30061.45  | 27139.64  |
| 45390.6   | 52132.71  | 53349.65  | 53976.32  | 33477.7   | 45476.89  | 70806.99  | 39036.93  | 37293.4   | 32202.6   |

|           |           |           |           |           |           |           |           |           |           |
|-----------|-----------|-----------|-----------|-----------|-----------|-----------|-----------|-----------|-----------|
| LN435.007 |
| 48853.77  | 32195.58  | 16978.58  | 27725.28  | 18806.69  | 34190.28  | 37293.25  | 57748.98  | 33721.82  | 37940.01  |
| 50823.4   | 30380.76  | 17142.75  | 32224.55  | 18855.27  | 31436.45  | 37559.02  | 46047.28  | 33401.53  | 39128.25  |
| 46921.2   | 29196.86  | 12671.05  | 30271.45  | 13284.51  | 29861.72  | 39130.78  | 58355.13  | 30463.85  | 29129.36  |
| 52820.99  | 28651.05  | 19626.13  | 29859.63  | 17353.29  | 31810.16  | 35554.01  | 47601.38  | 34543.53  | 40695.97  |
| 81296.23  | 25015.93  | 13021.76  | 33790.31  | 13283.24  | 31933.37  | 34543.29  | 48114.98  | 31282.97  | 38800.09  |

|           |           |           |           |           |           |           |           |           |           |
|-----------|-----------|-----------|-----------|-----------|-----------|-----------|-----------|-----------|-----------|
| LN435.007 | LN435.008 | LN435.007 | LN435.008 | LN435.008 | LN435.008 | LN435.008 | LN435.007 | LN435.186 | LN435.186 |
| 40196.86  | 22101.19  | 33650.18  | 19602.63  | 21152.86  | 54579.03  | 47200.43  | 42054.71  | 29217.58  | 38080.31  |
| 37481.7   | 23255.31  | 31664.77  | 23738.21  | 19999.83  | 58955.21  | 45925.76  | 40952.11  | 30454.84  | 43577.79  |
| 24855.15  | 21099.03  | 32114.83  | 14831.83  | 18710.01  | 54131.9   | 48559.77  | 45044.64  | 30026.26  | 39258.97  |
| 37082.76  | 22005.14  | 35352.78  | 20953.45  | 19022.43  | 58726.3   | 50925.1   | 41986.36  | 29064.66  | 45216.45  |
| 47432.05  | 14787.48  | 30341.85  | 25180.19  | 18118.59  | 54458.71  | 46288.62  | 40515.56  | 30664.2   | 39322.88  |

|           |           |           |           |           |           |           |           |           |           |
|-----------|-----------|-----------|-----------|-----------|-----------|-----------|-----------|-----------|-----------|
| LN435.186 |
| 52095.1   | 29452.01  | 29145.75  | 34094.26  | 58566.18  | 48014.73  | 35988.07  | 44852.37  | 29189.51  | 38288.67  |
| 55879.84  | 30794.38  | 30714.31  | 34525.5   | 57642.38  | 43952.41  | 32524.13  | 45362.48  | 32910.54  | 34374.35  |
| 55111.28  | 31858.48  | 34186.94  | 32371.32  | 59433.18  | 43128.76  | 37534.15  | 50073.21  | 34594.81  | 36722.84  |
| 60480.18  | 34268.95  | 31047.99  | 33810.5   | 57059.61  | 40998.43  | 29969.95  | 49482.66  | 33182.69  | 44717.16  |
| 57232.39  | 34689.51  | 33073.49  | 36808.14  | 60512.34  | 42126.95  | 38403.9   | 55207.76  | 28808.62  | 41640.78  |

|           |           |           |           |           |           |           |           |           |           |
|-----------|-----------|-----------|-----------|-----------|-----------|-----------|-----------|-----------|-----------|
| LN435.186 | LN436.059 | LN436.229 | LN436.805 | LN436.818 | LN437.004 | LN437.004 | LN437.005 | LN437.004 | LN437.005 |
| 21759.55  | 8175.076  | 35888.11  | 15352.95  | 18028.56  | 29304.46  | 58887.83  | 21471.23  | 37433.38  | 29127.83  |
| 25244.18  | 9335.816  | 33423.78  | 14424.44  | 17132.7   | 20366.37  | 46062.49  | 36851.97  | 41529.75  | 33243.92  |
| 26674.94  | 14738.35  | 28844.17  | 11017.15  | 16951.14  | 32538.88  | 61327.42  | 20976.93  | 36596.91  | 27039.78  |
| 24028.85  | 18337.78  | 22114.93  | 15191.58  | 15358.29  | 28321.22  | 56366.13  | 21302.34  | 38520.23  | 27081.89  |
| 25499.2   | 21420.02  | 26813.31  | 15359.87  | 16707.74  | 32896.23  | 55938.48  | 21150.39  | 38920.45  | 29088.08  |



|           |           |           |           |           |           |           |           |           |           |
|-----------|-----------|-----------|-----------|-----------|-----------|-----------|-----------|-----------|-----------|
| LN437.004 | LN437.004 | LN437.005 | LN437.004 | LN437.004 | LN437.005 | LN437.004 | LN437.004 | LN437.004 | LN437.004 |
| 28509.59  | 59666.71  | 44527.49  | 58358.99  | 55445.62  | 30222.59  | 51295.27  | 60042.02  | 42673.44  | 53202.65  |
| 33064.27  | 63968.22  | 43885.58  | 55801.91  | 56094.64  | 26967.06  | 33438.57  | 58657.26  | 54165.69  | 53438.38  |
| 28950.09  | 51237.84  | 39073.95  | 56188.47  | 58127.23  | 29718.85  | 58785.06  | 60488.92  | 37276.4   | 49708.32  |
| 26533.82  | 55131.91  | 40528.86  | 52987.51  | 51876.95  | 31409.38  | 49090.76  | 56466.02  | 35737.01  | 51040.07  |
| 27329.33  | 52099.9   | 38606.49  | 56371.46  | 51836.87  | 32445.11  | 46627.82  | 56325.57  | 36919.75  | 48681.09  |

|           |           |           |           |           |           |           |           |           |           |
|-----------|-----------|-----------|-----------|-----------|-----------|-----------|-----------|-----------|-----------|
| LN437.004 | LN437.004 | LN437.005 | LN437.004 | LN437.003 | LN437.004 | LN437.004 | LN437.004 | LN437.003 | LN437.004 |
| 35414.87  | 35246.77  | 22238.83  | 43692.06  | 78952.33  | 27791.24  | 30554.66  | 15537.21  | 60201.58  | 36764.91  |
| 27198.83  | 29207.26  | 18446.97  | 30070.84  | 77611.68  | 25009.39  | 25271.02  | 24082.69  | 48148.12  | 20399.59  |
| 33752.68  | 37504.34  | 19068.17  | 39470.52  | 72219.64  | 31109.78  | 27129.2   | 15052.43  | 52433.21  | 34581.72  |
| 33037.25  | 34270.59  | 21601.07  | 38028.18  | 74611.19  | 29246.95  | 30862.13  | 13704.51  | 53366.96  | 33277.16  |
| 34231.99  | 32716.91  | 17887.55  | 37997.19  | 71469.26  | 28761.49  | 27609.65  | 15726.77  | 56145.31  | 34381.65  |

|           |           |           |           |           |           |           |           |           |           |
|-----------|-----------|-----------|-----------|-----------|-----------|-----------|-----------|-----------|-----------|
| LN437.004 | LN437.005 | LN437.004 | LN437.004 |
| 27012.15  | 50926.24  | 38484.66  | 44829.3   | 29649.18  | 51486.96  | 60649.04  | 40166.49  | 27104.75  | 27424.66  |
| 25720.43  | 45599.34  | 39923.17  | 42829.89  | 20782.22  | 56657.76  | 57180.64  | 24034.01  | 24350.05  | 34076.42  |
| 24901.01  | 46081.35  | 43176.92  | 40798.31  | 31060.67  | 47811.75  | 56461.04  | 37000.02  | 26470.59  | 30744.41  |
| 26119.91  | 52108.88  | 37907.6   | 39502.82  | 30560.8   | 49565.43  | 54830.18  | 36291.43  | 25052.56  | 27221.69  |
| 26753.22  | 46739.49  | 41497.24  | 40767.64  | 31233.29  | 44550.72  | 52345.27  | 38108.47  | 25137.08  | 29130.01  |

|           |           |           |           |           |           |           |           |           |           |
|-----------|-----------|-----------|-----------|-----------|-----------|-----------|-----------|-----------|-----------|
| LN437.004 | LN437.004 | LN437.004 | LN437.004 | LN437.004 | LN437.005 | LN437.005 | LN437.004 | LN437.005 | LN437.005 |
| 74415.6   | 51653.27  | 36976.23  | 37084.13  | 38798.25  | 45057.11  | 28035.59  | 46302.46  | 14279.59  | 22456.48  |
| 55446.97  | 53859.54  | 31518.2   | 25580.5   | 40865.14  | 28412.65  | 32980.4   | 54105.11  | 14953.12  | 23417.12  |
| 68023.55  | 44959.65  | 36254.32  | 35647.9   | 40334.7   | 39667.4   | 29123.18  | 48256.07  | 13315.7   | 22950.31  |
| 75098.02  | 45646.66  | 33332.33  | 36128.46  | 41865.44  | 41039.32  | 30817.37  | 48576.81  | 15744.46  | 23366.84  |
| 76732.88  | 48920.54  | 35300.06  | 31260.68  | 39503.13  | 40334.87  | 29467.6   | 45299.23  | 14475.84  | 22991.13  |

|           |           |           |           |           |           |           |           |           |           |
|-----------|-----------|-----------|-----------|-----------|-----------|-----------|-----------|-----------|-----------|
| LN437.004 | LN437.004 | LN437.005 | LN437.004 | LN437.005 | LN437.004 | LN437.004 | LN437.004 | LN437.004 | LN437.004 |
| 77378.35  | 37970.77  | 22093.95  | 26818     | 19613.64  | 40164.49  | 46747.07  | 41110.49  | 41064.64  | 39149.41  |
| 63994.45  | 31223.49  | 18440.24  | 23941.11  | 20034.13  | 57567.86  | 59390.76  | 39107.36  | 27549.16  | 41245.13  |
| 68524.92  | 37765.92  | 22868.19  | 27882.73  | 17161.9   | 40366.2   | 49839.89  | 46706.2   | 37517.92  | 38321.06  |
| 67601.14  | 38802.3   | 23204.34  | 26963.56  | 16644.45  | 39721.3   | 44243.34  | 42716.08  | 40964.77  | 39034.2   |
| 73380.93  | 44277.2   | 21295.86  | 31049.77  | 16310.77  | 36629.57  | 39918.24  | 45633.71  | 40446.05  | 37131.28  |

|           |           |           |           |           |           |           |           |           |           |
|-----------|-----------|-----------|-----------|-----------|-----------|-----------|-----------|-----------|-----------|
| LN437.005 | LN437.004 | LN437.004 | LN437.005 | LN437.005 | LN437.004 | LN437.004 | LN437.005 | LN437.003 | LN437.004 |
| 30850.29  | 53378.35  | 37040.53  | 16793.02  | 31291.98  | 54111.98  | 51467.14  | 24545.61  | 84445.62  | 25621.88  |
| 30899.32  | 41991.01  | 38542.54  | 14121     | 28508.12  | 39927.14  | 39620.44  | 22678.76  | 47629.06  | 24895.97  |
| 28550.6   | 52527.99  | 35243.73  | 15342.99  | 29973.8   | 53289.48  | 50456.66  | 26328.1   | 78632.66  | 23370.99  |
| 29425.55  | 49743.49  | 36115.38  | 16917.81  | 29198.24  | 55682.82  | 53244.05  | 26666.7   | 81337.69  | 23045.1   |
| 29637.61  | 53489.42  | 38417.36  | 15916.17  | 29205.49  | 53440.76  | 51580.97  | 24902.36  | 72447.85  | 21709.1   |

|           |           |           |           |           |           |           |           |           |           |
|-----------|-----------|-----------|-----------|-----------|-----------|-----------|-----------|-----------|-----------|
| LN437.004 | LN437.004 | LN437.004 | LN437.005 | LN437.004 | LN437.004 | LN437.004 | LN437.004 | LN437.004 | LN437.004 |
| 19709.8   | 68532.25  | 37851.08  | 20872.82  | 21953.4   | 45549.62  | 72814.87  | 43659.34  | 55440.04  | 30410.84  |
| 29571.3   | 64050.49  | 36714.25  | 18530.88  | 20264.89  | 55638.97  | 65683.27  | 53607.57  | 48079.4   | 31491.48  |
| 18483.73  | 62188.32  | 38184.35  | 19095.76  | 23565.18  | 40850.47  | 71315.36  | 40457.89  | 55110.48  | 29495.58  |
| 19471.44  | 57760.27  | 36377.04  | 18895.65  | 24626.79  | 43630.06  | 66034.46  | 43650.08  | 52225.3   | 26531.97  |
| 20379.43  | 58211.53  | 34787.82  | 18927.59  | 22241.6   | 44767.86  | 66550.83  | 40565.4   | 50572.05  | 25891.71  |

|           |           |           |           |           |           |           |           |           |           |
|-----------|-----------|-----------|-----------|-----------|-----------|-----------|-----------|-----------|-----------|
| LN437.004 | LN437.004 | LN437.004 | LN437.004 | LN437.005 | LN437.004 | LN437.005 | LN437.004 | LN437.004 | LN437.004 |
| 27367.81  | 73993.69  | 51664.16  | 42070.03  | 18772.76  | 46222.04  | 30603.78  | 52179.9   | 51347.96  | 40029.11  |
| 18740.11  | 68415.62  | 48114.86  | 49303.84  | 12355.48  | 43661.37  | 29935.07  | 39985.75  | 38840.07  | 25097.2   |
| 26384.03  | 69722.57  | 55968.16  | 39777.25  | 17931     | 49019.17  | 33556.31  | 52314.98  | 50192.79  | 37001.52  |
| 24522.93  | 63041.96  | 49595.44  | 45709.75  | 17077.44  | 46832.38  | 34839.18  | 51611.83  | 49208.61  | 37569.36  |
| 23330.5   | 69153.38  | 44219.47  | 42256.87  | 16919.62  | 47405.06  | 29956.6   | 56766.71  | 57754.3   | 39867.53  |



|           |           |           |           |           |           |           |           |           |           |
|-----------|-----------|-----------|-----------|-----------|-----------|-----------|-----------|-----------|-----------|
| LN437.022 | LN437.021 | LN437.022 | LN437.022 |
| 54811.87  | 78439.28  | 77903.26  | 76253.44  | 61288.37  | 44079.04  | 29046.44  | 101353.9  | 42129.22  | 65869.67  |
| 55525.31  | 77908.98  | 84402.55  | 75606.6   | 61787.91  | 42421.96  | 31042.72  | 98732.46  | 44915.11  | 61967.61  |
| 54642.34  | 78689.18  | 76643.6   | 77826.58  | 69209.21  | 43020.21  | 28911.53  | 97825.95  | 40566.76  | 65584.05  |
| 57041.26  | 80096.93  | 78596.49  | 79941.88  | 61518.37  | 42099.47  | 30811.83  | 99409.99  | 40817.33  | 62527.35  |
| 61548.89  | 76841.51  | 80682.84  | 75391.88  | 59030.42  | 43109.8   | 30027.15  | 98431.3   | 45280.09  | 62997.66  |

|           |           |           |           |           |           |           |           |           |           |
|-----------|-----------|-----------|-----------|-----------|-----------|-----------|-----------|-----------|-----------|
| LN437.021 | LN437.022 | LN437.022 | LN437.022 | LN437.201 | LN437.202 | LN437.202 | LN437.202 | LN437.202 | LN437.202 |
| 56292.73  | 69896.48  | 32703.64  | 51349.82  | 42893.34  | 35543.66  | 26389.82  | 35976.95  | 40377.96  | 25269.15  |
| 58789.07  | 67127.95  | 27756.78  | 55547.99  | 40029.82  | 38727.01  | 26742.07  | 40854.48  | 40938.08  | 25930.68  |
| 53090.48  | 69226.48  | 29410.96  | 53111.77  | 43758.29  | 38577.52  | 26276.91  | 37810.24  | 40922.54  | 26526.94  |
| 50120.22  | 71291.76  | 28597.02  | 53096.94  | 41796.35  | 41597.95  | 25604.12  | 38017.36  | 41306.8   | 28303.78  |
| 63840.39  | 68587.16  | 27225.11  | 51487.06  | 39138.28  | 35026.41  | 25651.4   | 37892.53  | 41186.74  | 22873.41  |

|           |           |           |           |           |           |           |           |           |           |           |
|-----------|-----------|-----------|-----------|-----------|-----------|-----------|-----------|-----------|-----------|-----------|
| LN437.202 | LN437.813 | LN438.785 | LN438.856 |
| 22169.68  | 24855.48  | 46946.22  | 31302.76  | 38393.02  | 46202.93  | 46241.63  | 12063.75  | 20404.74  | 14541.15  |           |
| 22326.14  | 27640.25  | 41076.68  | 32278.16  | 38152.86  | 52250.11  | 41303.14  | 13599.56  | 11663.21  | 15845.75  |           |
| 22198.09  | 28259.37  | 42235.78  | 34348.16  | 37734.74  | 47175     | 41525.12  | 14900.63  | 15181.02  | 16120.86  |           |
| 23586.12  | 25959.16  | 46379.8   | 30417.11  | 41455.1   | 44480.5   | 43512.49  | 14389.27  | 19369.3   | 15873.91  |           |
| 21325.87  | 25694.47  | 44118.48  | 33049.89  | 37719.57  | 45873.07  | 40000.24  | 16882.09  | 19878.08  | 13937.48  |           |

|           |           |           |           |           |           |           |           |           |           |
|-----------|-----------|-----------|-----------|-----------|-----------|-----------|-----------|-----------|-----------|
| LN438.856 |
| 24731.18  | 13659.11  | 21252.07  | 16135.93  | 14968.08  | 20364.19  | 15290.02  | 22669.54  | 22330.74  | 17400.84  |
| 22954.55  | 13926.52  | 17875.96  | 17425.17  | 16202.73  | 21527.35  | 17999.8   | 21399.08  | 22968.02  | 18108.7   |
| 25639.34  | 14930.36  | 17666.04  | 16971.16  | 13915.58  | 21058.63  | 15304.79  | 24306.1   | 23378.75  | 18123.45  |
| 24900.27  | 13011.26  | 18415.37  | 14655.3   | 17016.83  | 18385.5   | 17779.39  | 22429.62  | 23294.06  | 18485.92  |
| 23915.2   | 12233.04  | 18045.15  | 16508.89  | 16167.6   | 17748.31  | 14878.53  | 21235.23  | 23562.4   | 14612.77  |

|           |           |           |           |           |           |           |           |           |           |
|-----------|-----------|-----------|-----------|-----------|-----------|-----------|-----------|-----------|-----------|
| LN438.856 | LN439.000 | LN439.001 |
| 22295.41  | 69332.1   | 33470.7   | 34752.73  | 25770.17  | 23301.58  | 39362.09  | 32176.08  | 43307.58  | 42826.34  |
| 19470.98  | 61771.65  | 42220.07  | 37710.25  | 31792.45  | 24814.94  | 44031.33  | 32853.54  | 48349.7   | 44690.99  |
| 20022.22  | 69784.89  | 37431.83  | 33818.13  | 28896.6   | 24423.76  | 37209.97  | 33099.55  | 39810.01  | 40458.88  |
| 18124.26  | 63836.96  | 32515.52  | 29765.76  | 28240.25  | 23871.93  | 35939.84  | 32277.51  | 38983.87  | 45800.98  |
| 19400.31  | 70973.25  | 33475.15  | 31281.58  | 26373.64  | 23453.12  | 38563.65  | 30626.96  | 39843.77  | 43479.73  |

|           |           |           |           |           |           |           |           |           |           |
|-----------|-----------|-----------|-----------|-----------|-----------|-----------|-----------|-----------|-----------|
| LN439.000 | LN439.001 |
| 39293.41  | 22998.25  | 27004.79  | 25975.93  | 31307.86  | 26974.83  | 21520.14  | 42913.84  | 18910.38  | 27340.73  |
| 42617.88  | 25519.67  | 30085.04  | 27316.12  | 35733.55  | 26910.69  | 23033.93  | 43387.27  | 20385.98  | 27758.56  |
| 38232.62  | 23903.05  | 22865.75  | 25451.6   | 33063.54  | 23683.94  | 20621.25  | 44917.51  | 19967.73  | 25526.8   |
| 35968.98  | 21990.46  | 24251.17  | 24076.97  | 32519.49  | 28397.52  | 21389.3   | 41017.44  | 18423.76  | 26158.91  |
| 39520.51  | 24196.28  | 26997.87  | 26057.93  | 30704.37  | 27053.76  | 23566.72  | 40396.63  | 19056.68  | 24049.31  |

|           |           |           |           |           |           |           |           |           |           |
|-----------|-----------|-----------|-----------|-----------|-----------|-----------|-----------|-----------|-----------|
| LN439.001 |
| 17695.14  | 23212.69  | 15681.31  | 18911.52  | 18777.47  | 43294.26  | 22625.34  | 30791.83  | 22240.3   | 24529.83  |
| 19880.23  | 24349.14  | 15443.65  | 21054.72  | 17729.32  | 44955.65  | 23034.5   | 32536.21  | 25369.97  | 27360.27  |
| 16912.39  | 25127.84  | 12503.12  | 19091.99  | 16579.61  | 45390.15  | 23737.65  | 34810.84  | 24544.58  | 27306.07  |
| 18077.34  | 24351.69  | 14073.36  | 19766     | 16800.11  | 42463.62  | 26148.37  | 29815.06  | 22380.96  | 24578.18  |
| 16181.08  | 20910.53  | 15813.38  | 19288.77  | 16435.84  | 42565.69  | 22184.24  | 31945.22  | 19216.76  | 23849.43  |

|           |           |           |           |           |           |           |           |           |           |
|-----------|-----------|-----------|-----------|-----------|-----------|-----------|-----------|-----------|-----------|
| LN439.001 | LN439.000 | LN439.001 |
| 25845.3   | 25559.04  | 37052.18  | 33572.21  | 24784.19  | 50134.7   | 24975.11  | 31403.18  | 37126.51  | 38916.08  |
| 27030.22  | 25611.34  | 39396.79  | 31819     | 30113.52  | 50298.39  | 31274.79  | 31633.44  | 39410.58  | 39703.57  |
| 26917.34  | 24730.57  | 38764.09  | 30911.53  | 27954.9   | 53745.27  | 27977.77  | 29329.7   | 39867.46  | 36050.97  |
| 25081.86  | 29117.07  | 34420.66  | 33127.33  | 29808.79  | 52192.78  | 26956.46  | 28365.26  | 34891.89  | 36904.9   |
| 24622.09  | 29140.09  | 31637.3   | 29235.61  | 25291.64  | 54646.16  | 27723.57  | 30964.4   | 37713.81  | 35303.48  |



|           |           |           |           |           |           |           |           |           |           |
|-----------|-----------|-----------|-----------|-----------|-----------|-----------|-----------|-----------|-----------|
| LN439.001 |
| 49493.66  | 30898.4   | 24922.57  | 25256.94  | 36022.33  | 14172.37  | 35998.79  | 35232.42  | 44496.5   | 23325.62  |
| 48307.42  | 35703.63  | 30621.44  | 20721.17  | 37937.6   | 16803.66  | 40952.16  | 33732.11  | 47974.7   | 26999.01  |
| 42603.89  | 32542     | 25787.63  | 23595.35  | 35977.4   | 12526     | 36807.53  | 33117.06  | 44613.94  | 24626.41  |
| 47561.84  | 36075.4   | 23916.77  | 21325.33  | 33765.65  | 14753.1   | 38764.2   | 32903.67  | 43788.51  | 24427.06  |
| 48604.76  | 34067.58  | 26444.81  | 24343.95  | 33544.94  | 12159.25  | 34841.44  | 32953.77  | 45819.42  | 22720.28  |

|           |           |           |           |           |           |           |           |           |           |
|-----------|-----------|-----------|-----------|-----------|-----------|-----------|-----------|-----------|-----------|
| LN439.001 | LN439.000 | LN439.001 | LN439.001 | LN439.001 | LN439.001 | LN439.000 | LN439.000 | LN439.001 | LN439.001 |
| 34056     | 71697.35  | 23882.59  | 32930.34  | 22777     | 32137.04  | 35131.06  | 43749.21  | 39771.04  | 53385.26  |
| 35948.08  | 72537.49  | 26554.64  | 34718.1   | 22036.85  | 36793.15  | 42116.2   | 41927.8   | 40638.09  | 54619.01  |
| 33374.16  | 71167.26  | 25870.03  | 30189.11  | 20203.62  | 32967.04  | 36165.08  | 39382.74  | 42873.8   | 48798.61  |
| 37054.91  | 69772.49  | 24991.9   | 27444.34  | 19056.4   | 28704.24  | 38401.45  | 40183.75  | 40300.39  | 49163.43  |
| 33344.74  | 73231.83  | 22433.2   | 28837.51  | 20727.83  | 31335.78  | 37232.95  | 40435.14  | 35311.29  | 51878.59  |

|           |           |           |           |           |           |           |           |           |           |
|-----------|-----------|-----------|-----------|-----------|-----------|-----------|-----------|-----------|-----------|
| LN439.001 | LN439.000 |
| 39933.45  | 22609.7   | 17750.13  | 24676.36  | 33488.92  | 29895.2   | 11924.53  | 46217.63  | 34569.25  | 16622.54  |
| 44207.89  | 24968.83  | 20492.82  | 27232.22  | 36996.26  | 28659.93  | 15199.46  | 51742.51  | 38736.06  | 15114.08  |
| 40188.96  | 18717.64  | 19475.59  | 24332.68  | 33501.88  | 29820.74  | 13609.82  | 45535.79  | 37445.61  | 13217.75  |
| 42133.35  | 22901.26  | 16883.63  | 23566.55  | 33207.39  | 27760.13  | 13930.35  | 51269.63  | 38506.32  | 15327.58  |
| 38978.98  | 21879.74  | 18630     | 24715.91  | 31825.16  | 28600.56  | 13359.71  | 42915.82  | 33362.26  | 17196.49  |

|           |           |           |           |           |           |           |           |           |           |
|-----------|-----------|-----------|-----------|-----------|-----------|-----------|-----------|-----------|-----------|
| LN439.001 |
| 57062.31  | 22721.49  | 32485.65  | 37993.59  | 19048.21  | 34388.46  | 16232.04  | 34712.82  | 39752.9   | 28992.71  |
| 57284.67  | 23171.06  | 32128.82  | 41841.08  | 25503.49  | 38064.52  | 17572.08  | 29504.02  | 42977.49  | 31988.73  |
| 49390.99  | 22217.95  | 29797.19  | 36108.27  | 18432.27  | 32141.98  | 18013.25  | 34945.84  | 37927.83  | 29328.98  |
| 52573.39  | 23122.64  | 32856.55  | 35032.56  | 20984.45  | 36296.53  | 18036.73  | 34274.98  | 37647.83  | 26622.94  |
| 54175.39  | 23697.69  | 29900.3   | 40274.07  | 20128.03  | 32323.87  | 13772.4   | 31959.09  | 36295.88  | 29102.43  |

|           |           |           |           |           |           |           |           |           |           |
|-----------|-----------|-----------|-----------|-----------|-----------|-----------|-----------|-----------|-----------|
| LN439.001 | LN439.019 | LN439.019 | LN439.019 |
| 17169.62  | 20570.41  | 19802.97  | 20545.59  | 25200.44  | 35130.57  | 46750.28  | 38293.49  | 31687.29  | 39980.58  |
| 24714.08  | 26099.67  | 19492.03  | 22313.2   | 24790.56  | 38421.22  | 55567.75  | 34715.88  | 38458.83  | 36513.68  |
| 23893.1   | 22732.44  | 20972.26  | 21104.47  | 23050.75  | 36503.01  | 52214.99  | 35435.32  | 33996.87  | 39059.18  |
| 24024.75  | 21955.98  | 19429.7   | 20047.93  | 23182.85  | 37083.71  | 50765.54  | 35286.52  | 38002.18  | 39405.67  |
| 23129.1   | 21951.99  | 20344.65  | 17744.96  | 24453.53  | 30095.19  | 50117.98  | 35742.16  | 31666.26  | 35308.98  |

|           |           |           |           |           |           |           |           |           |           |
|-----------|-----------|-----------|-----------|-----------|-----------|-----------|-----------|-----------|-----------|
| LN439.019 | LN439.019 | LN439.019 | LN439.019 | LN439.02_ | LN439.02_ | LN439.019 | LN439.019 | LN439.019 | LN439.039 |
| 55426.49  | 56712.06  | 36329.1   | 40081.1   | 47606.99  | 48122.35  | 64084.24  | 65388.5   | 49189.43  | 18072.77  |
| 54978.94  | 56869.37  | 28363.9   | 45030.74  | 50443.1   | 51441     | 64672.21  | 66201.11  | 46989.43  | 46436.02  |
| 48017.04  | 56655.45  | 28312.3   | 41784.21  | 46470.22  | 48694.11  | 55439.1   | 69611.62  | 50186.4   | 42430.66  |
| 53002.05  | 54395.55  | 31835.28  | 39815.98  | 44153.8   | 46973.27  | 63401.69  | 62035.28  | 48574.99  | 40578.06  |
| 51014.58  | 47322.12  | 28144.62  | 42765.07  | 43475.47  | 46792.15  | 59352.52  | 60565.12  | 46001.47  | 41072.42  |

|           |           |           |           |           |           |           |           |           |           |
|-----------|-----------|-----------|-----------|-----------|-----------|-----------|-----------|-----------|-----------|
| LN439.039 | LN439.040 | LN439.04_ | LN439.039 | LN439.807 | LN440.815 | LN440.997 | LN440.998 | LN440.998 | LN440.998 |
| 14261.01  | 17594.94  | 51213.75  | 55582.24  | 29668.99  | 13378.82  | 93291.24  | 67670.82  | 17448.6   | 69439.44  |
| 33030.05  | 34795.96  | 51854.24  | 47369.11  | 23919.51  | 11300.22  | 114174.3  | 67710.06  | 27556.07  | 72253.77  |
| 32228.93  | 35912.56  | 55553.65  | 54016.96  | 32582     | 11334.15  | 103741.6  | 58039.2   | 23185.92  | 55952.52  |
| 35047.77  | 37262.84  | 53292.82  | 49750.64  | 33680.62  | 13503.79  | 84808.54  | 83709.32  | 20684.65  | 86733.95  |
| 32097.2   | 33859.04  | 56430.83  | 56508.5   | 32259.78  | 13423.7   | 104028.7  | 69427.31  | 19290.37  | 91269.66  |

|           |           |           |           |           |           |           |           |           |           |
|-----------|-----------|-----------|-----------|-----------|-----------|-----------|-----------|-----------|-----------|
| LN440.998 | LN440.998 | LN440.998 | LN440.998 | LN440.998 | LN440.997 | LN440.998 | LN440.998 | LN440.998 | LN440.998 |
| 64241.72  | 65279.95  | 21443.05  | 60433.07  | 65967.74  | 93802.81  | 57744.09  | 100033    | 78849.23  | 59652.18  |
| 61656.57  | 48573.85  | 24833.11  | 48877.37  | 91464.99  | 102239.1  | 43852.74  | 85474.43  | 93668.65  | 38383.06  |
| 58036.08  | 58771.88  | 21102.4   | 73652.52  | 65326.38  | 119334.1  | 48045.91  | 108943.8  | 83184.09  | 49604.31  |
| 80507.53  | 65920.76  | 32604.08  | 57764.21  | 83207.94  | 118896.3  | 65020.95  | 86402.42  | 73687.36  | 52741.52  |
| 62841.67  | 51609.73  | 34067.35  | 56431.08  | 73169.74  | 142726.5  | 54036.71  | 87813.09  | 104026.1  | 56373.46  |



|           |           |           |           |           |           |           |           |           |           |
|-----------|-----------|-----------|-----------|-----------|-----------|-----------|-----------|-----------|-----------|
| LN440.998 | LN440.997 | LN440.998 | LN440.998 | LN440.998 | LN440.997 | LN440.998 | LN440.998 | LN440.998 | LN440.997 |
| 87015.4   | 70869.82  | 61613.34  | 110122.4  | 60429.03  | 96887.54  | 75581.52  | 26787.67  | 33684.02  | 122834.4  |
| 101906.2  | 81210.37  | 64473.64  | 84507.41  | 120386.5  | 109549.6  | 71836.7   | 35644.76  | 35817.66  | 91134.15  |
| 77894.34  | 72742.35  | 85762.56  | 56736.95  | 133977.4  | 91967.01  | 71954.19  | 50218.5   | 23661.96  | 88826.04  |
| 90542.23  | 80155.1   | 93478     | 76408.03  | 100086.4  | 109601.2  | 97673.18  | 47764.9   | 44419.44  | 90141.26  |
| 92831.27  | 97204.02  | 86994.33  | 58222.31  | 84281.41  | 144933.5  | 75662.31  | 40987.24  | 21927.58  | 90214     |

|           |           |           |           |           |           |           |           |           |           |
|-----------|-----------|-----------|-----------|-----------|-----------|-----------|-----------|-----------|-----------|
| LN440.998 | LN440.997 | LN440.998 | LN440.997 |
| 35136.54  | 77446.37  | 54412.78  | 55231.72  | 53510.17  | 68433.37  | 77782.45  | 103621.9  | 95859.43  | 165281.5  |
| 27998.79  | 42375.02  | 43979.84  | 62912.44  | 36539.18  | 72686.67  | 67001.44  | 136127    | 70131.59  | 136637.2  |
| 24749.64  | 40831.49  | 63797.8   | 54950.01  | 43588.33  | 74489.45  | 84056.5   | 134976.5  | 68035.27  | 132306.1  |
| 33108.02  | 46114.13  | 56368.75  | 41664.33  | 49912.45  | 60010.92  | 77600.25  | 128568.7  | 99832.79  | 144780.5  |
| 26149.63  | 65038.15  | 57660.74  | 71243.73  | 42057.99  | 86879.41  | 64095.64  | 130539.6  | 68884.25  | 107717.8  |

|           |           |           |           |           |           |           |           |           |           |
|-----------|-----------|-----------|-----------|-----------|-----------|-----------|-----------|-----------|-----------|
| LN440.998 | LN440.998 | LN440.998 | LN440.998 | LN440.997 | LN440.998 | LN440.998 | LN440.998 | LN440.998 | LN440.998 |
| 65987.17  | 53585.75  | 90595.05  | 31138.65  | 122490.2  | 76754.95  | 47482.52  | 71434.89  | 95578.86  | 53296.92  |
| 48401.12  | 62762.21  | 83717.05  | 43035.18  | 116855.7  | 49130.49  | 54382.09  | 82961.6   | 79878.83  | 68777.11  |
| 54842.44  | 70589.47  | 95592.04  | 49013.47  | 112557    | 72822.18  | 52064.1   | 46342.73  | 92597.75  | 58698.27  |
| 37587.9   | 62038.08  | 136414.9  | 57152.93  | 116477    | 49307.25  | 47508.2   | 78108.51  | 137385.1  | 70483.69  |
| 73462.78  | 70081.58  | 85383.16  | 49268.43  | 124371.1  | 64514.68  | 67180.73  | 39728.24  | 71831.95  | 48470.73  |

|           |           |           |           |           |           |           |           |           |           |
|-----------|-----------|-----------|-----------|-----------|-----------|-----------|-----------|-----------|-----------|
| LN440.998 | LN440.997 | LN440.998 |
| 111302.9  | 90177.8   | 107426.3  | 28431.71  | 60891.78  | 59844.2   | 102524.1  | 83674.32  | 97764.31  | 31108.57  |
| 102745.3  | 118919.4  | 116828.6  | 29649.08  | 90219.72  | 56886.04  | 100836.8  | 91472.64  | 95529.28  | 34170.88  |
| 97270.05  | 91557.87  | 81714.84  | 28914.51  | 75681.01  | 66652.01  | 91723.05  | 111495.9  | 102037.2  | 34143.47  |
| 79712.32  | 120977.2  | 112783.1  | 23001.69  | 88527.54  | 56554.51  | 124646.2  | 153626.2  | 93314.21  | 32877.63  |
| 129304.5  | 125899.4  | 78908.07  | 32057.55  | 82894.33  | 87912.29  | 107544.6  | 146066.6  | 75109.61  | 52252.17  |

|           |           |           |           |           |           |           |           |           |           |
|-----------|-----------|-----------|-----------|-----------|-----------|-----------|-----------|-----------|-----------|
| LN440.998 | LN440.998 | LN440.998 | LN440.998 | LN440.997 | LN440.997 | LN440.998 | LN440.998 | LN440.998 | LN440.998 |
| 31355.2   | 80879.6   | 89555.71  | 79723.81  | 176181.8  | 85862.6   | 58324.75  | 52066.07  | 56647.9   | 52374.13  |
| 32844.24  | 104250.9  | 57873.23  | 75471.82  | 111642.7  | 94961.08  | 71058.87  | 42857.78  | 81201.16  | 64048.17  |
| 32351.45  | 94104.2   | 91313.45  | 79263.84  | 123067.9  | 119847.6  | 64511.33  | 52380.65  | 71854.95  | 80120.52  |
| 32271.04  | 71408.61  | 66437.1   | 108319    | 123465.1  | 107952.6  | 56195.36  | 47111.43  | 60213.93  | 67104.04  |
| 33697.18  | 86411.89  | 103427.2  | 75261.35  | 110960.2  | 78434.99  | 46436.68  | 50226.06  | 46865.06  | 46666.21  |

|           |           |           |           |           |           |           |           |           |           |
|-----------|-----------|-----------|-----------|-----------|-----------|-----------|-----------|-----------|-----------|
| LN440.998 | LN440.997 | LN440.998 | LN440.998 | LN440.998 | LN440.998 | LN440.997 | LN440.998 | LN440.998 | LN440.998 |
| 43061.14  | 110887.4  | 97388.03  | 38556.39  | 31260.73  | 34881.64  | 110058.4  | 149335.7  | 99258.57  | 39482.56  |
| 47690.3   | 93354.51  | 67735.61  | 25341.57  | 25079.87  | 29475.08  | 94475.5   | 95679.71  | 118183.7  | 46470.37  |
| 54578.79  | 190045.5  | 61950.36  | 23765.43  | 24427.31  | 31328.97  | 113166.8  | 108002.7  | 87325.51  | 49214.34  |
| 67205.6   | 100774    | 87479.86  | 27134.5   | 25179.4   | 20007.98  | 68316.74  | 89786.83  | 80542.92  | 42450.25  |
| 50385.14  | 86469.65  | 112299.8  | 26408.21  | 43710.15  | 30462.48  | 91603.56  | 92926.15  | 69854.06  | 39387.79  |

|           |           |           |           |           |           |           |           |           |           |
|-----------|-----------|-----------|-----------|-----------|-----------|-----------|-----------|-----------|-----------|
| LN440.998 | LN440.998 | LN440.998 | LN441.807 | LN443.150 | LN443.247 | LN444.356 | LN444.429 | LN444.785 | LN445.030 |
| 65129.35  | 70859.6   | 67047.79  | 20097.53  | 16897.29  | 164511.8  | 31370.3   | 36203.29  | 16602.37  | 45199.44  |
| 73544.25  | 87342.13  | 44586.32  | 17485.47  | 16668.29  | 185370    | 11980.62  | 38785.94  | 14588.17  | 46939.2   |
| 64212.33  | 74381.03  | 39573.27  | 17214.33  | 15537.01  | 280195.7  | 35327.17  | 38605.02  | 17726.29  | 45152.5   |
| 46548.23  | 73529.95  | 50168.59  | 22766     | 15501.23  | 346690.4  | 10545.87  | 34288.67  | 14797.47  | 44857.41  |
| 74469     | 75756.75  | 54076.17  | 18897.68  | 16392.18  | 380798.8  | 28299.03  | 31953.35  | 20443.08  | 44258.72  |

|           |           |           |           |           |           |           |           |           |           |
|-----------|-----------|-----------|-----------|-----------|-----------|-----------|-----------|-----------|-----------|
| LN445.03_ | LN445.030 | LN445.030 | LN445.030 | LN445.030 | LN445.239 | LN445.243 | LN446.088 | LN446.160 | LN446.834 |
| 48445.66  | 46937.69  | 38467.28  | 53156.59  | 64581.65  | 31654.08  | 30401.58  | 5434.102  | 37322.48  | 34631.17  |
| 50102.97  | 48196.73  | 40347.38  | 48667.29  | 63373.54  | 26893.55  | 30566.83  | 6173.154  | 44388.46  | 33177.21  |
| 48762.85  | 46893.59  | 38972.3   | 48719.46  | 61661.77  | 25181.82  | 37564.26  | 9678.09   | 47063.76  | 38273.26  |
| 48355.72  | 43862.52  | 35415.75  | 49676.46  | 57900.34  | 19795.22  | 40400.29  | 12012.46  | 42699.08  | 45797.66  |
| 43674.72  | 43798.79  | 37383.9   | 51080.74  | 60397.91  | 20578.18  | 46144.58  | 13213.32  | 44212.46  | 33933.49  |



|           |           |           |           |           |           |           |           |           |           |
|-----------|-----------|-----------|-----------|-----------|-----------|-----------|-----------|-----------|-----------|
| LN446.905 |
| 123005.1  | 59606.05  | 47402.52  | 119336.1  | 198474.4  | 122712.4  | 121307.1  | 82028.38  | 103133.5  | 52380.65  |
| 147407    | 57960.32  | 49874.28  | 119273.8  | 141275.7  | 130806.1  | 135405.3  | 59620.17  | 141192.4  | 58485.95  |
| 151020.6  | 55427.26  | 45280.67  | 118225.9  | 122896.6  | 133512.4  | 139175    | 64369.66  | 116921.8  | 60676.58  |
| 100671.4  | 58727.92  | 44589.28  | 164668.4  | 165338.4  | 134982.2  | 117598.9  | 75768     | 113162.9  | 49948.88  |
| 104251.5  | 44824.57  | 45323.98  | 119253.5  | 107686.7  | 149561.3  | 140317.3  | 95135.36  | 116889.1  | 57670.94  |

|           |           |           |           |           |           |           |           |           |           |
|-----------|-----------|-----------|-----------|-----------|-----------|-----------|-----------|-----------|-----------|
| LN446.905 |
| 167399.9  | 141081.9  | 138578.9  | 68547.94  | 134739.4  | 91776.82  | 134622.6  | 136525.5  | 128206.7  | 148150.2  |
| 113123    | 169046.6  | 146860    | 70539.23  | 121263.1  | 88753.27  | 94097.48  | 110484    | 120635.5  | 168883.9  |
| 117012.2  | 167755.3  | 141139.1  | 66779.32  | 114799.8  | 93441.54  | 116870.2  | 109496.2  | 131212    | 130820.2  |
| 123867    | 133134    | 99766.65  | 59371.66  | 113327.3  | 116926.1  | 118630.3  | 106587    | 153265.2  | 129285.9  |
| 112889.6  | 220819.2  | 102461.2  | 69490.05  | 115879.8  | 84781.04  | 106960.5  | 104089.3  | 125039.9  | 196385.5  |

|           |           |           |           |           |           |           |           |           |           |
|-----------|-----------|-----------|-----------|-----------|-----------|-----------|-----------|-----------|-----------|
| LN446.905 |
| 159845.3  | 84841.38  | 175475.1  | 139578.1  | 118573.6  | 119542.2  | 122611.2  | 143065.9  | 107192.8  | 122098    |
| 159438    | 98357.48  | 134414.7  | 115605.4  | 92221.52  | 134027.6  | 132214.5  | 133065.3  | 110725.3  | 103013.2  |
| 161213    | 78499.58  | 107591.2  | 106603.8  | 120412.2  | 126094.3  | 123006.2  | 130269    | 91910.84  | 101271.3  |
| 159894.2  | 96936.98  | 108798.5  | 122231.4  | 107028.4  | 129561.4  | 186723.1  | 145387    | 113672.3  | 94385.72  |
| 117224.1  | 89070.42  | 93262.7   | 108096.8  | 108890.3  | 116721.4  | 112998    | 122878    | 98570.48  | 102012.9  |

|           |           |           |           |           |           |           |           |           |           |
|-----------|-----------|-----------|-----------|-----------|-----------|-----------|-----------|-----------|-----------|
| LN446.905 |
| 153887.5  | 152511.1  | 118752.8  | 106731.6  | 120321.8  | 138175.7  | 114524.4  | 126595    | 147182.8  | 157416.8  |
| 191695.1  | 103193.7  | 118284.6  | 98300.95  | 173322.9  | 98598.44  | 134591    | 107722.9  | 123006.2  | 133405.1  |
| 132323.2  | 113352.6  | 113876.9  | 100896.5  | 124220.4  | 133843.1  | 119968.6  | 88620.48  | 113235.2  | 127737    |
| 143283.5  | 111275.8  | 120482.7  | 98017.46  | 128168.1  | 83654.92  | 107411    | 127926.2  | 105596.2  | 122981.3  |
| 176470.3  | 102142.9  | 122263.4  | 106535.1  | 154847.6  | 118518.9  | 114469.5  | 88717.12  | 123369.7  | 85239.62  |

|           |           |           |           |           |           |           |           |           |           |
|-----------|-----------|-----------|-----------|-----------|-----------|-----------|-----------|-----------|-----------|
| LN446.905 | LN446.905 | LN446.905 | LN446.905 | LN446.905 | LN446.906 | LN446.905 | LN446.905 | LN446.906 | LN446.905 |
| 151354.9  | 101255.9  | 138466.1  | 121814.9  | 126644.8  | 47229.3   | 71669.85  | 125796.4  | 54476.53  | 126959.6  |
| 116945.1  | 134401.5  | 99066.69  | 115541.1  | 126052.4  | 49199     | 68355.65  | 139082.4  | 36092.87  | 120764.1  |
| 117912.8  | 130085.2  | 86559.02  | 122315.5  | 115964.4  | 45985.01  | 66936.19  | 152665.7  | 32111.37  | 115569.7  |
| 111466.2  | 149491.9  | 88216.99  | 136900.3  | 124278.5  | 38818.26  | 67540.97  | 150142.5  | 46007.7   | 108829.6  |
| 115618.5  | 122824    | 122697.3  | 111719    | 139295.6  | 46196.64  | 66795.48  | 137314.2  | 34871.12  | 106359.6  |

|           |           |           |           |           |           |           |           |           |           |
|-----------|-----------|-----------|-----------|-----------|-----------|-----------|-----------|-----------|-----------|
| LN446.905 |
| 143080    | 78287.78  | 117644.3  | 58552.21  | 145678.5  | 33997.92  | 34782.13  | 109342.4  | 47672.01  | 131057.5  |
| 152425.6  | 94796.32  | 103597    | 63821.28  | 150065    | 29229.22  | 29740.54  | 107271.5  | 49127.69  | 140365.2  |
| 153815.4  | 98839.19  | 98092.97  | 60372.04  | 144537.4  | 31563.14  | 28823.18  | 108471.9  | 46213.66  | 141395.4  |
| 122483.3  | 96607.35  | 106527.9  | 57192.37  | 141570.7  | 37791.48  | 32704.57  | 100710.2  | 47591.13  | 129590.1  |
| 133626.4  | 85890.14  | 96433.34  | 83668.29  | 143233.5  | 27754.91  | 27677.31  | 70390.9   | 56360.81  | 137752.2  |

|           |           |           |           |           |           |           |           |           |           |
|-----------|-----------|-----------|-----------|-----------|-----------|-----------|-----------|-----------|-----------|
| LN446.905 | LN446.905 | LN446.906 | LN447.148 | LN447.148 | LN447.163 | LN448.441 | LN449.166 | LN449.165 | LN449.165 |
| 29797.19  | 29682.73  | 60423.22  | 23037.31  | 33279.6   | 13650.45  | 123580.1  | 26615.48  | 42915.66  | 53364.97  |
| 29849.69  | 29729.99  | 61020.62  | 22801.79  | 27153.58  | 18453.79  | 126474.4  | 29812.03  | 46814.51  | 49600.74  |
| 29174.64  | 28947.47  | 63711.81  | 22984.4   | 31088.45  | 15528.52  | 114110.9  | 35782.12  | 39717.24  | 46671.09  |
| 28068.77  | 28109.85  | 58721.15  | 23582.64  | 31086.84  | 9268.853  | 110644.4  | 29161.72  | 42930.46  | 47299.33  |
| 26178.56  | 26008.39  | 54781.91  | 22408.17  | 27981.23  | 16691.73  | 100844.4  | 34532.66  | 36247.45  | 46350.83  |

|           |           |           |           |           |           |           |           |           |           |
|-----------|-----------|-----------|-----------|-----------|-----------|-----------|-----------|-----------|-----------|
| LN449.202 | LN449.202 | LN449.202 | LN449.202 | LN449.791 | LN450.314 | LN450.314 | LN450.315 | LN450.315 | LN450.315 |
| 34356.74  | 31527.71  | 46012.75  | 42967.23  | 31908.61  | 19756.37  | 19882.99  | 24738.13  | 22680.42  | 27672.5   |
| 34580.06  | 38082.24  | 43600.5   | 47368.48  | 24691.06  | 23505.24  | 15089.33  | 28365.81  | 23547.14  | 26322.13  |
| 33961.74  | 32349.79  | 41697.53  | 40047.24  | 17598     | 21986.83  | 16211.42  | 27072.69  | 21009.69  | 25593.83  |
| 30775.3   | 37158.31  | 43966.91  | 41004.56  | 22284.44  | 22814.48  | 19335.88  | 29744     | 20998.62  | 27629.34  |
| 34032.31  | 31486.99  | 36306.26  | 41790.98  | 22654.62  | 20187.57  | 17133.32  | 27160.65  | 20257.19  | 28881.7   |



|           |           |           |           |           |           |           |           |           |           |
|-----------|-----------|-----------|-----------|-----------|-----------|-----------|-----------|-----------|-----------|
| LN450.315 | LN450.839 | LN451.001 | LN451.791 | LN451.841 | LN452.838 | LN452.922 | LN452.922 | LN452.922 | LN452.922 |
| 25981.9   | 53420.91  | 50546.23  | 24636.54  | 23226.36  | 23364.29  | 487828.2  | 270785.9  | 276752.5  | 288592.9  |
| 21148.69  | 48837     | 51244.12  | 20918.6   | 26074.24  | 19675.34  | 312144.5  | 213031.4  | 262298.5  | 352535.3  |
| 24184.45  | 51489.72  | 46929.61  | 23890.97  | 27417.77  | 19281.63  | 225188.7  | 247561.2  | 280605.2  | 305028.1  |
| 24546.91  | 71870.97  | 46842.52  | 26818.19  | 25845.05  | 25741.01  | 300705.8  | 248225.2  | 279595.3  | 310196.1  |
| 22079.76  | 75292.66  | 50720.72  | 34419.55  | 24198.66  | 24878.85  | 251241.5  | 235747.8  | 271660.6  | 296210.8  |

|           |           |           |           |           |           |           |           |           |           |
|-----------|-----------|-----------|-----------|-----------|-----------|-----------|-----------|-----------|-----------|
| LN452.922 |
| 255462.6  | 178673.7  | 200526.3  | 167688.7  | 152405.3  | 202890.4  | 183580.9  | 114736.7  | 156894.5  | 217680.7  |
| 251209.9  | 188940    | 196602.2  | 177067.6  | 143975.6  | 211535.2  | 184357.5  | 100833.7  | 143984.3  | 205689.4  |
| 249361.2  | 183951.7  | 196199.4  | 167113.4  | 141515    | 204910.2  | 182576.1  | 107712.2  | 142958.3  | 221507    |
| 250670.3  | 183950.8  | 205596.6  | 178734    | 141947.8  | 204473.5  | 187449.4  | 107145.9  | 149943    | 194433.5  |
| 239563.8  | 165371.3  | 195992.6  | 174700.9  | 145867.8  | 195361    | 173493    | 101584.9  | 143289.6  | 205850.4  |

|           |           |           |           |           |           |           |           |           |           |
|-----------|-----------|-----------|-----------|-----------|-----------|-----------|-----------|-----------|-----------|
| LN452.922 |
| 165824.3  | 142580.4  | 119055.1  | 139233.5  | 139250.1  | 103626.6  | 217747.9  | 103526.4  | 85257.8   | 163216.3  |
| 169300.7  | 134076    | 125099.1  | 149564.6  | 143044.4  | 106511.7  | 229922.4  | 100634.9  | 89696.96  | 178040    |
| 159834    | 139358.5  | 121810.5  | 139255.4  | 140723    | 104454.2  | 212220.4  | 102058.8  | 84990     | 131225.5  |
| 164084    | 138574.1  | 114374.2  | 127466.9  | 146826    | 88899.76  | 216739.1  | 94458.74  | 83670.33  | 134057.8  |
| 162835.9  | 131292.7  | 108743.3  | 136169.2  | 135685.1  | 98320.14  | 209576.9  | 100788.3  | 86674.87  | 121048.1  |

|           |           |           |           |           |           |           |           |           |           |
|-----------|-----------|-----------|-----------|-----------|-----------|-----------|-----------|-----------|-----------|
| LN452.923 | LN452.922 | LN452.922 | LN452.922 | LN452.922 | LN452.922 | LN452.923 | LN452.922 | LN452.922 | LN452.923 |
| 92429.68  | 140124.9  | 326551.9  | 212333.3  | 195093.6  | 276429.2  | 112310.7  | 87154.1   | 298541.2  | 217706.7  |
| 87867.16  | 145967.1  | 192940.1  | 190331.8  | 299243.1  | 211653.8  | 80380.13  | 134699.3  | 293994    | 205588.7  |
| 73623.82  | 153078.1  | 185381.4  | 267405.2  | 304597.7  | 210181    | 73433.95  | 83545.68  | 356305.8  | 221018.7  |
| 93203.95  | 129326.5  | 171186.3  | 275484.1  | 271453.5  | 236807    | 75556.01  | 88794.42  | 278022    | 223854.5  |
| 81211.19  | 132912.8  | 230175.3  | 330181    | 264270    | 238749.6  | 69581.54  | 71970.82  | 420585.2  | 199018.4  |

|           |           |           |           |           |           |           |           |           |           |
|-----------|-----------|-----------|-----------|-----------|-----------|-----------|-----------|-----------|-----------|
| LN452.922 | LN452.922 | LN452.922 | LN452.922 | LN452.922 | LN452.922 | LN452.923 | LN452.922 | LN452.922 | LN452.922 |
| 415752.4  | 231303.8  | 183895.5  | 356350.5  | 181807.3  | 241195    | 199023.4  | 221003.2  | 215159.7  | 265187.8  |
| 355413.9  | 237858.2  | 173799.1  | 344738.3  | 189530.5  | 252727.4  | 218181.1  | 223509    | 202337.5  | 254515.7  |
| 341391.4  | 238210    | 143964.6  | 333878.5  | 263549    | 233476.7  | 212496    | 221590.1  | 212882    | 265491.5  |
| 328787.5  | 219789.7  | 178580.7  | 341702.9  | 189110.2  | 239881.3  | 183148.1  | 202571.3  | 198411.1  | 256328.5  |
| 366946.9  | 291768.4  | 174277.7  | 324323    | 180574.7  | 211550.8  | 182316.6  | 219441.4  | 190330    | 263044.1  |

|           |           |           |           |           |           |           |           |           |           |
|-----------|-----------|-----------|-----------|-----------|-----------|-----------|-----------|-----------|-----------|
| LN452.923 | LN452.922 | LN452.922 | LN452.922 | LN452.923 | LN452.922 | LN452.923 | LN452.923 | LN452.923 | LN452.923 |
| 95899.34  | 215978.3  | 343639.8  | 206549    | 214577.3  | 180712    | 215350.9  | 118188    | 169406.7  | 244137.3  |
| 98562.63  | 221267    | 380046.5  | 209979.6  | 217764    | 165075.7  | 217778.9  | 116763.8  | 169106.9  | 239827.2  |
| 80235.54  | 210692.9  | 356459.6  | 201106.8  | 223226.8  | 152422.4  | 205368.2  | 107455.8  | 152650    | 262825.7  |
| 89076.33  | 199284    | 332536.4  | 211556.9  | 240147.2  | 161799    | 219136.7  | 104787.7  | 155733.6  | 270814.6  |
| 90154.62  | 186208.4  | 335141.9  | 201144.1  | 209275.9  | 161977.3  | 195911.3  | 112382.2  | 164641.8  | 265021.9  |

|           |           |           |           |           |           |           |           |           |           |
|-----------|-----------|-----------|-----------|-----------|-----------|-----------|-----------|-----------|-----------|
| LN452.923 | LN452.923 | LN452.922 | LN452.923 | LN453.178 | LN453.234 | LN453.785 | LN454.458 | LN454.793 | LN454.995 |
| 165573.4  | 332150.3  | 187858.8  | 109886.6  | 80457.83  | 78248.03  | 92046.15  | 169935.5  | 35750.94  | 72663.41  |
| 165447.8  | 329387.7  | 186404.7  | 113505.8  | 84183.13  | 71894.19  | 93404.69  | 176513.7  | 28997.18  | 74266.71  |
| 170573.8  | 278671.8  | 190002.8  | 114924.3  | 96636.84  | 67284.44  | 90265.19  | 171394.3  | 35933.35  | 73823.7   |
| 180922.1  | 301854.8  | 181847.7  | 114345.3  | 72370.47  | 82856.51  | 116449.8  | 160384.9  | 37942.25  | 72960.73  |
| 184530.1  | 281816.4  | 178055.4  | 111072.7  | 78071.66  | 63952.04  | 157215.9  | 143513.3  | 38274.36  | 74940.69  |

|           |           |           |           |           |           |           |           |           |           |
|-----------|-----------|-----------|-----------|-----------|-----------|-----------|-----------|-----------|-----------|
| LN454.994 | LN454.995 | LN454.995 | LN454.995 | LN454.996 | LN454.995 | LN454.995 | LN454.996 | LN454.995 | LN454.995 |
| 77265.97  | 26724.73  | 43003.86  | 85764.6   | 77736.76  | 37402.94  | 65972.23  | 31467.64  | 44982.44  | 30780.82  |
| 81904.46  | 27603.6   | 42650.38  | 91078.52  | 73725.35  | 34806.53  | 64832.48  | 33418.6   | 43055.48  | 27782.12  |
| 73863.21  | 27923.42  | 43116.08  | 85454.31  | 72683.02  | 40467.61  | 65475.02  | 32464.42  | 45153.1   | 34686.69  |
| 85011.3   | 27619.49  | 45009.62  | 85195.56  | 66832.36  | 33551.67  | 64106.32  | 29837.56  | 42796.02  | 32779.24  |
| 86045.03  | 25993.76  | 43465.43  | 86450.38  | 75340.38  | 36598.35  | 66968.09  | 28699.66  | 44529.78  | 30400.35  |



|           |           |           |           |           |           |           |           |           |           |
|-----------|-----------|-----------|-----------|-----------|-----------|-----------|-----------|-----------|-----------|
| LN454.995 | LN455.012 |
| 25993.93  | 35528.75  | 52755.39  | 60914.18  | 18452.35  | 83028.4   | 24409.3   | 22020.14  | 99494.38  | 82656.88  |
| 24776.71  | 35482.71  | 55190.06  | 60780.25  | 16933.5   | 97224.54  | 23733.75  | 26550.38  | 96547.32  | 86088.59  |
| 23948.47  | 35079.9   | 51552.66  | 61925.77  | 17578.44  | 82081.9   | 21967.62  | 23645.51  | 99365.14  | 80498.91  |
| 25481.64  | 38620.74  | 50405.74  | 61665.1   | 16714.31  | 78575.11  | 23964.86  | 23807.72  | 92742.23  | 78848.31  |
| 24534.89  | 31695.52  | 49702.23  | 64858.31  | 15960.92  | 86392.35  | 24131.54  | 24336.35  | 93407.28  | 85567.93  |

|           |           |           |           |           |           |           |           |           |           |
|-----------|-----------|-----------|-----------|-----------|-----------|-----------|-----------|-----------|-----------|
| LN455.013 | LN455.014 |
| 78244     | 49991.47  | 72526.72  | 61703.43  | 46842.58  | 58535.19  | 76815.51  | 64439.13  | 61026.65  | 52824.08  |
| 132407.1  | 52008.41  | 94085.6   | 86242.19  | 72314.2   | 50228.66  | 111468.1  | 82081.93  | 61039.41  | 60312.33  |
| 84307.74  | 48341.97  | 75156.42  | 58093.06  | 48727.03  | 71377.2   | 74323.96  | 65173.08  | 63481.03  | 53987.65  |
| 78441.55  | 56526.53  | 74009.11  | 58749.57  | 51063.12  | 63865.92  | 77943.39  | 65758.97  | 70159.66  | 55619.78  |
| 80094.63  | 38615.6   | 69719.55  | 48845.19  | 53169.7   | 58148.46  | 114674.7  | 73946.58  | 72707.9   | 53198.75  |

|           |           |           |           |           |           |           |           |           |           |           |
|-----------|-----------|-----------|-----------|-----------|-----------|-----------|-----------|-----------|-----------|-----------|
| LN455.014 | LN455.013 | LN455.014 | LN455.013 | LN455.013 |
| 60573.23  | 51253.11  | 37646.96  | 45857.44  | 70810.46  | 113435.5  | 79825.11  | 73104.06  | 44166.9   | 75337.67  |           |
| 74625.05  | 41644.75  | 41892.79  | 57526.76  | 62834.57  | 91956.95  | 92459.16  | 76574.47  | 100999.8  | 96111.65  |           |
| 61764.99  | 51577.84  | 41094.95  | 49963.49  | 75401.26  | 109174.7  | 77342.86  | 65662.18  | 55849.29  | 78356.27  |           |
| 57839.13  | 50343.96  | 37679.51  | 54767.85  | 78852.76  | 116800.4  | 79853.12  | 67151.47  | 56897.88  | 81956.27  |           |
| 67389.85  | 57666.72  | 26570.09  | 38468.67  | 65002.45  | 102597.7  | 70378.6   | 70017.84  | 50697.15  | 73836.27  |           |

|           |           |           |           |           |           |           |           |           |           |
|-----------|-----------|-----------|-----------|-----------|-----------|-----------|-----------|-----------|-----------|
| LN455.014 | LN455.013 | LN455.013 | LN455.014 | LN455.013 | LN455.013 | LN455.014 | LN455.013 | LN455.013 | LN455.013 |
| 34983.21  | 111848.6  | 74746.62  | 50336.74  | 61744.55  | 53746.88  | 25996.89  | 81846.26  | 77452.54  | 52254.82  |
| 47233.91  | 111528    | 92967.73  | 44205.13  | 58559.32  | 53338     | 31238.85  | 84693.62  | 78098.44  | 44722.25  |
| 39610.14  | 107726.2  | 81972.17  | 47880.93  | 68761.18  | 49463.1   | 24973.24  | 91617.8   | 77147.12  | 52528.13  |
| 38761.17  | 99849.49  | 86522.61  | 42723.33  | 74813.54  | 45129.15  | 25736.99  | 89405.15  | 85986.54  | 52435.13  |
| 42199.48  | 106449.4  | 91121.22  | 33953.42  | 77238.15  | 53262.18  | 20674.67  | 65115.87  | 114443.6  | 46316.56  |

|           |           |           |           |           |           |           |           |           |           |           |
|-----------|-----------|-----------|-----------|-----------|-----------|-----------|-----------|-----------|-----------|-----------|
| LN455.013 | LN455.014 | LN455.013 | LN455.014 |
| 45641.26  | 64236.77  | 99168.45  | 52109.36  | 64977.62  | 70815.63  | 47736.33  | 43679.61  | 38568.46  | 53694.38  |           |
| 60425.65  | 53607.93  | 76080.7   | 63078.68  | 104460.4  | 58249.23  | 56763.74  | 59886.48  | 44848.47  | 45847.69  |           |
| 41904.57  | 60822.17  | 88640.94  | 46138     | 70449.1   | 75775.22  | 49394.33  | 50184.22  | 43683.6   | 56497.09  |           |
| 43524.23  | 65547.9   | 89371.69  | 45063.96  | 65191.23  | 63702.03  | 48349.84  | 47340.02  | 42679.88  | 47379.24  |           |
| 43103.48  | 54435.45  | 108786.6  | 38899.35  | 94384.53  | 83817.26  | 43966.77  | 66782.47  | 44196.6   | 49939.91  |           |

|           |           |           |           |           |           |           |           |           |           |
|-----------|-----------|-----------|-----------|-----------|-----------|-----------|-----------|-----------|-----------|
| LN455.013 | LN455.014 | LN455.013 | LN455.013 | LN455.014 | LN455.013 | LN455.013 | LN455.014 | LN455.014 | LN455.013 |
| 106890.5  | 52049.35  | 105996.5  | 18309.59  | 21744.5   | 34073.9   | 50555.24  | 49451.35  | 41177.8   | 80619.47  |
| 105250.8  | 61659.3   | 121955.8  | 18318.7   | 21150.8   | 31048.82  | 44174.55  | 47656.33  | 39136.36  | 108739.2  |
| 100291.6  | 54351.87  | 128938.6  | 18786.04  | 21130.44  | 27883.37  | 48392.06  | 42162.98  | 39973.45  | 75528.55  |
| 100905.7  | 56856.75  | 116913.9  | 21882.15  | 24112.2   | 34135.95  | 47611.17  | 43178.47  | 40773.79  | 73347.18  |
| 111453.8  | 56920.23  | 96379.68  | 13102.21  | 29194.37  | 37480.61  | 49612.76  | 47207.4   | 33989.32  | 67245.88  |

|           |           |           |           |           |           |           |           |           |           |
|-----------|-----------|-----------|-----------|-----------|-----------|-----------|-----------|-----------|-----------|
| LN455.013 | LN455.014 | LN455.013 | LN455.013 |
| 57838.63  | 102321.7  | 80136.35  | 64720.93  | 82082.47  | 75972.37  | 55769.18  | 36081.29  | 85002.63  | 76298.71  |
| 57968.88  | 144061.9  | 93692.03  | 82229.06  | 107597.8  | 72781.45  | 41919.21  | 30790.28  | 78673.76  | 66974.68  |
| 60035     | 111927.3  | 79257.7   | 64934.26  | 81557.88  | 78283.42  | 59565.57  | 32268.16  | 76537.49  | 79456.3   |
| 61680.76  | 125105    | 74302.46  | 70710.78  | 83116.25  | 80047.87  | 56773.11  | 34285.71  | 72498.82  | 82257.54  |
| 62888.73  | 93220.58  | 77477.82  | 71553.3   | 79163.93  | 68211.45  | 58818.92  | 43133.86  | 45503.62  | 85080.94  |

|           |           |           |           |           |           |           |           |           |           |
|-----------|-----------|-----------|-----------|-----------|-----------|-----------|-----------|-----------|-----------|
| LN455.014 | LN455.013 | LN455.013 | LN455.014 | LN455.014 | LN455.013 | LN455.014 | LN455.014 | LN455.013 | LN455.014 |
| 23212.82  | 49210.75  | 80907.61  | 34490.39  | 59233.43  | 75368.48  | 53256.99  | 21957.95  | 71926.79  | 29024.18  |
| 26567.06  | 53801.85  | 71802.48  | 34492.03  | 62577.24  | 82481.37  | 53014.23  | 18106.58  | 99773.99  | 33127.37  |
| 23390.66  | 58381.54  | 70139.31  | 33723.1   | 59500.77  | 81076.33  | 56458.37  | 21345.27  | 80092.37  | 28303.01  |
| 19388.98  | 58029.09  | 70675.11  | 35907.19  | 61466.81  | 71993.21  | 48982.47  | 23715.96  | 76328.51  | 31799     |
| 25953.43  | 40200.8   | 78920.34  | 32231.46  | 63032.67  | 119800.1  | 46795.28  | 22842.39  | 77665.75  | 29621.48  |



|           |           |           |           |           |           |           |           |           |           |
|-----------|-----------|-----------|-----------|-----------|-----------|-----------|-----------|-----------|-----------|
| LN455.013 | LN455.014 | LN455.013 | LN455.013 | LN455.013 | LN455.013 | LN455.014 | LN455.013 | LN455.014 | LN455.014 |
| 47796.7   | 28265.68  | 122268.6  | 42378.07  | 56065.06  | 50369.28  | 29198.83  | 47521.27  | 59270.96  | 47841.65  |
| 45444.12  | 33470.93  | 130638.2  | 48930.08  | 50384.94  | 47418.05  | 21365.75  | 48410.45  | 55488.04  | 38404.16  |
| 41794.54  | 27807.6   | 106189.3  | 38087.34  | 53316.32  | 55381.2   | 27664.05  | 48253.93  | 60663.76  | 47427.18  |
| 44307.1   | 23777.84  | 113433.9  | 34589.3   | 45649.1   | 49723.23  | 28029.71  | 48914.6   | 63319.23  | 47874.14  |
| 50611.21  | 31640.26  | 133516.5  | 50319.77  | 58247.97  | 42564.07  | 28619.85  | 48266.65  | 77698.79  | 49702.11  |

|           |           |           |           |           |           |           |           |           |           |
|-----------|-----------|-----------|-----------|-----------|-----------|-----------|-----------|-----------|-----------|
| LN455.014 | LN455.013 | LN455.013 | LN455.013 | LN455.250 | LN455.786 | LN456.788 | LN456.860 | LN456.861 | LN456.861 |
| 22151.98  | 45633.68  | 99819.43  | 128349.2  | 42013.2   | 31949.94  | 96020.25  | 46572.74  | 56804.41  | 17606.84  |
| 20111.78  | 47294.28  | 113796.7  | 126078    | 39130.92  | 30361.74  | 78712.24  | 49367.03  | 63208.68  | 15744.63  |
| 22362.04  | 43117.95  | 101862.5  | 133451.8  | 42422.26  | 32518.35  | 107037.3  | 53269.13  | 67087.99  | 13409.98  |
| 18867.06  | 48097.1   | 105495.7  | 134893.8  | 42223.33  | 39996.03  | 102261.7  | 47950.55  | 59626.86  | 17547.91  |
| 18857.88  | 46065.25  | 129057.9  | 141266.7  | 36399.04  | 32853.3   | 145126.8  | 51699.91  | 62529.96  | 15492.22  |

|           |           |           |           |           |           |           |           |           |           |
|-----------|-----------|-----------|-----------|-----------|-----------|-----------|-----------|-----------|-----------|
| LN456.974 | LN456.974 | LN457.791 | LN458.789 | LN458.989 | LN458.989 | LN458.989 | LN458.988 | LN458.988 | LN458.988 |
| 39142.9   | 51479.18  | 13369.17  | 29316.56  | 21234.75  | 37040.75  | 30829.73  | 36168.61  | 49173.49  | 60550.86  |
| 36374.39  | 49991.17  | 9552.23   | 33221.35  | 19672.38  | 50103.34  | 35515.19  | 36303.97  | 48649.4   | 69500.19  |
| 36958.68  | 47560.2   | 9873.134  | 34389.83  | 11937.33  | 39891.71  | 33295.26  | 47439.85  | 50660.73  | 66011.5   |
| 36104.44  | 46293.96  | 10995.92  | 36792.31  | 13879.05  | 36337.55  | 30003.08  | 33512.26  | 49776.84  | 65212.94  |
| 36416.86  | 45561.97  | 14861.19  | 39716.94  | 12079.45  | 34400.07  | 33261.76  | 36764.64  | 39896.53  | 56094.98  |

|           |           |           |           |           |           |           |           |           |           |
|-----------|-----------|-----------|-----------|-----------|-----------|-----------|-----------|-----------|-----------|
| LN458.988 | LN458.988 | LN458.989 | LN458.988 | LN458.989 | LN458.989 | LN458.989 | LN458.988 | LN458.988 | LN458.989 |
| 53526.63  | 39547.61  | 18219.92  | 45437.03  | 39423.77  | 35689.78  | 19022.34  | 58133.29  | 55571.53  | 38375.75  |
| 49554.13  | 35642.51  | 22752.6   | 40817.14  | 46553.49  | 30792.86  | 23803.24  | 83594.25  | 59335.78  | 43147.47  |
| 44956.43  | 38616.51  | 13869.88  | 49897.27  | 43642.34  | 32790.14  | 14514.32  | 82721.25  | 48982.65  | 48254.54  |
| 52173.17  | 39380.01  | 18049.82  | 46336.19  | 36806.7   | 31897.82  | 19188.92  | 56224.57  | 52438.78  | 39414.26  |
| 46842.6   | 44138.71  | 14204.69  | 32805.75  | 41915.42  | 30489.88  | 18602.68  | 42833.07  | 60011.59  | 44204.8   |

|           |           |           |           |           |           |           |           |           |           |
|-----------|-----------|-----------|-----------|-----------|-----------|-----------|-----------|-----------|-----------|
| LN458.988 | LN458.989 | LN458.989 | LN458.988 |
| 52176.41  | 27457.84  | 20676.76  | 47828.46  | 39992.13  | 46467.43  | 58943.84  | 88812.98  | 47764.76  | 56776.37  |
| 49103.88  | 50065.29  | 19173.89  | 56856.27  | 65021.68  | 48972.86  | 66156.29  | 72260.72  | 67441.39  | 49114.86  |
| 75650.59  | 36067.06  | 32641.7   | 43532.11  | 42897.32  | 35789.67  | 56695.31  | 85393.07  | 53447.58  | 53786.87  |
| 49863.63  | 32068.77  | 19300.29  | 45281.67  | 39941.13  | 51969.7   | 58435.73  | 95438.03  | 45656.58  | 51551.87  |
| 52915.26  | 20302.75  | 22154.22  | 43876.66  | 52713.9   | 35936.73  | 50150.92  | 95895.49  | 58887.32  | 68501.8   |

|           |           |           |           |           |           |           |           |           |           |
|-----------|-----------|-----------|-----------|-----------|-----------|-----------|-----------|-----------|-----------|
| LN458.989 | LN458.988 | LN458.988 | LN458.988 | LN458.988 | LN458.988 | LN458.989 | LN458.989 | LN458.989 | LN458.989 |
| 31072.33  | 49104.11  | 61594.11  | 31938.57  | 49685.76  | 62009.91  | 38267.6   | 27167.48  | 18042.23  | 30262.66  |
| 45646.12  | 67122.69  | 55493.82  | 22904.7   | 77394.46  | 56592.74  | 35630.93  | 27981.38  | 17740.4   | 26580.77  |
| 40040.6   | 59275.76  | 79713.98  | 32636.84  | 34823.56  | 76538.49  | 41863.77  | 27874.38  | 18660.67  | 30784.56  |
| 30084.19  | 47563.04  | 69624.36  | 30671.49  | 49497.73  | 59150.39  | 35343.39  | 26595.26  | 19578.25  | 31100.39  |
| 30551.16  | 83105.58  | 59119.52  | 26361.51  | 57508.41  | 55625.43  | 41373.51  | 30501.07  | 18946.81  | 29681.81  |

|           |           |           |           |           |           |           |           |           |           |
|-----------|-----------|-----------|-----------|-----------|-----------|-----------|-----------|-----------|-----------|
| LN458.988 | LN458.989 | LN458.988 | LN458.988 | LN458.988 | LN458.988 | LN458.989 | LN458.989 | LN458.989 | LN458.989 |
| 50600.54  | 18977.83  | 60552.76  | 85458.67  | 34791.04  | 56955.15  | 28818.9   | 42312.66  | 35069.58  | 50222.31  |
| 42934.22  | 26181.27  | 50481.41  | 76767.74  | 42475.46  | 59790.98  | 26180.49  | 38687.98  | 42314.13  | 62070.31  |
| 53200.56  | 19618.76  | 47016.81  | 101464.6  | 29631.43  | 45458.25  | 25449.52  | 40773.29  | 30085.62  | 43126.02  |
| 47480.98  | 21125.7   | 58027.72  | 90146.07  | 34227.13  | 53582.72  | 30606.18  | 46462.19  | 30132.39  | 52884.86  |
| 33407.11  | 15730.85  | 60500.32  | 68349.7   | 34746.77  | 61645.31  | 26277.03  | 49083.29  | 28096.47  | 45150.21  |

|           |           |           |           |           |           |           |           |           |           |
|-----------|-----------|-----------|-----------|-----------|-----------|-----------|-----------|-----------|-----------|
| LN458.988 | LN458.988 | LN458.988 | LN458.989 | LN458.989 | LN458.988 | LN458.988 | LN458.989 | LN458.989 | LN458.989 |
| 79131.03  | 32374.02  | 62303.04  | 33986.96  | 29783.89  | 78814.85  | 55974.67  | 32024.6   | 37796.48  | 33579.59  |
| 126700.5  | 38480.64  | 45509.78  | 35955.04  | 30758.3   | 65508.16  | 77166.07  | 37032.3   | 38401.86  | 26106.53  |
| 87623.23  | 32967.61  | 94877.74  | 38412.45  | 31570.63  | 62083.55  | 50297.71  | 40905.45  | 38770.17  | 31829.77  |
| 69901.93  | 31444.72  | 56148.13  | 29907.68  | 26851.99  | 79872.69  | 51691.01  | 29582.14  | 38003.69  | 29393.13  |
| 125718.7  | 38437.8   | 60583.67  | 26669.99  | 33510.77  | 82211.21  | 54146.02  | 39035.44  | 37813.34  | 35645.97  |



|           |           |           |           |           |           |           |           |           |           |
|-----------|-----------|-----------|-----------|-----------|-----------|-----------|-----------|-----------|-----------|
| LN458.989 | LN458.989 | LN458.988 | LN458.989 | LN458.989 | LN458.988 | LN458.989 | LN458.989 | LN458.989 | LN458.989 |
| 28032.62  | 35073.71  | 48256.46  | 31076.98  | 27060.87  | 32561.72  | 33519.48  | 16380.72  | 40426.71  | 41753.82  |
| 36301.34  | 49906.45  | 57364.65  | 29068.94  | 25186.34  | 30135.25  | 37699.84  | 16144.38  | 43641.67  | 47196.38  |
| 27898.66  | 42379.97  | 52225.51  | 31110.18  | 33224.11  | 37061.99  | 30070.89  | 23923.07  | 25923.44  | 36193.18  |
| 32679.88  | 33947.59  | 53978.09  | 29775.31  | 25929.17  | 35973     | 37347.86  | 16054.79  | 41817.53  | 42528.87  |
| 25977.25  | 43891.38  | 34790.83  | 29924.23  | 30180.24  | 32491.69  | 37674.24  | 19209.23  | 30082.68  | 45315.36  |

|           |           |           |           |           |           |           |           |           |           |
|-----------|-----------|-----------|-----------|-----------|-----------|-----------|-----------|-----------|-----------|
| LN458.988 | LN458.989 | LN458.988 | LN458.989 | LN458.989 | LN458.989 | LN458.989 | LN458.988 | LN458.988 | LN458.989 |
| 43394.8   | 35045.74  | 44268.79  | 26408.47  | 53619.38  | 45688.63  | 18555.6   | 49645.87  | 42478.12  | 19066.4   |
| 44838.79  | 31921.98  | 53085.89  | 26742.64  | 36006.11  | 44961.01  | 16317.48  | 52606.88  | 50378.02  | 18841.25  |
| 40599.47  | 34853.1   | 41589.77  | 27338.51  | 39409.2   | 40279.75  | 25680.83  | 54442.14  | 56611.44  | 21059.53  |
| 41754.66  | 27280.1   | 41418.15  | 30103.78  | 53646.4   | 35559.19  | 16353.92  | 41169.93  | 45754.38  | 21061.06  |
| 45646.86  | 26131.86  | 38646.28  | 35232.02  | 39802.98  | 40451.85  | 15909.5   | 38277.56  | 49781.5   | 20999.94  |

|           |           |           |           |           |           |           |           |           |           |
|-----------|-----------|-----------|-----------|-----------|-----------|-----------|-----------|-----------|-----------|
| LN458.988 | LN458.988 | LN458.989 | LN458.988 | LN458.989 | LN458.989 | LN458.989 | LN458.988 | LN458.989 | LN458.988 |
| 59159.76  | 54276.91  | 33279.33  | 44888.28  | 40317.53  | 17757.21  | 22394.38  | 65266.3   | 35127.91  | 62770.68  |
| 66821.15  | 46505.77  | 39446.57  | 49546.58  | 44604.2   | 32906.3   | 21283.61  | 75091.62  | 37990.31  | 61828.12  |
| 57115.57  | 38178.52  | 36392.18  | 58581.67  | 48593.15  | 22674.05  | 21290.89  | 75437.68  | 42024.35  | 68167.48  |
| 58332.86  | 59478.87  | 37566.32  | 43502.08  | 47249.35  | 18384.86  | 21565.04  | 65063.51  | 30653.41  | 70908.39  |
| 85549.23  | 48866.4   | 34269.05  | 51528.81  | 40256.83  | 18233.89  | 17447.68  | 71562.79  | 33129.18  | 64210.68  |

|           |           |           |           |           |           |           |           |           |           |
|-----------|-----------|-----------|-----------|-----------|-----------|-----------|-----------|-----------|-----------|
| LN459.026 | LN459.121 | LN459.195 | LN459.223 | LN459.223 | LN460.198 | LN460.786 | LN460.985 | LN460.985 | LN462.803 |
| 35728.47  | 13828.09  | 101346.6  | 16255.53  | 17472.75  | 18557.19  | 12063.5   | 38030.67  | 42034.86  | 46451.49  |
| 37385.67  | 17482.87  | 104319.7  | 16835.21  | 17673.99  | 17389.46  | 11077.98  | 36073.6   | 41967.06  | 40095.51  |
| 37253.59  | 17142.43  | 112503.7  | 18145.52  | 18064.27  | 19614.94  | 12064.76  | 36877.57  | 42580.95  | 44108.92  |
| 36398.25  | 14618.95  | 92379.95  | 15917.27  | 18353.69  | 16766.24  | 12823.69  | 39792.83  | 40326.23  | 41199.02  |
| 39482.02  | 13379.49  | 84839.45  | 15003.14  | 17113.54  | 17520.83  | 13259.7   | 37742.76  | 40416.62  | 54582.05  |

|           |           |           |           |           |           |           |           |           |           |
|-----------|-----------|-----------|-----------|-----------|-----------|-----------|-----------|-----------|-----------|
| LN462.804 | LN462.805 | LN462.982 |
| 22075.53  | 14211.38  | 45118.07  | 41034.6   | 54872.01  | 49558.66  | 65467.78  | 36969.27  | 54579.82  | 44507.76  |
| 23377.26  | 11080.89  | 40620.1   | 39551.49  | 55727.58  | 47191.69  | 71080.93  | 36587.98  | 52837.13  | 40715.25  |
| 23499.09  | 12062.24  | 44719.08  | 41245.81  | 53856.55  | 47484.34  | 58090.99  | 33808.51  | 52895.59  | 41353.89  |
| 22845.6   | 14604.19  | 50106.46  | 40105.59  | 49467.37  | 50990.46  | 63539.37  | 38557.79  | 56369.44  | 41443.94  |
| 24910.63  | 14814.73  | 46895.86  | 37917.76  | 52287.85  | 44546.69  | 63294.04  | 35940.62  | 54222.16  | 42200.65  |

|           |           |           |           |           |           |           |           |           |           |
|-----------|-----------|-----------|-----------|-----------|-----------|-----------|-----------|-----------|-----------|
| LN462.983 | LN463.039 | LN463.039 |
| 28290.9   | 34877.76  | 39159.32  | 33368.68  | 27501.55  | 36484.53  | 50031.03  | 36269.24  | 51481.34  | 55740.03  |
| 30273.66  | 31627.86  | 33956.92  | 29384.12  | 29574.33  | 35443.83  | 48988.6   | 37295.37  | 53421.65  | 55382.59  |
| 29867.6   | 30733.06  | 38053.54  | 26158.04  | 27447.58  | 34734.72  | 50627.03  | 36443.03  | 47970.21  | 52727.75  |
| 30211.79  | 30633.65  | 34469.33  | 27647.01  | 26811.29  | 34996.06  | 49784.51  | 35395.46  | 53860.85  | 55796.81  |
| 26883.25  | 30948.36  | 38268.77  | 29658.29  | 28415.66  | 33526.38  | 45554.6   | 36884.97  | 56196.54  | 60191.42  |

|           |           |           |           |           |           |           |           |           |           |
|-----------|-----------|-----------|-----------|-----------|-----------|-----------|-----------|-----------|-----------|
| LN463.038 | LN463.180 | LN463.180 | LN463.255 | LN464.413 | LN464.801 | LN464.820 | LN464.997 | LN464.997 | LN464.997 |
| 57162.28  | 52001.84  | 36575.03  | 27286.15  | 72077.71  | 32680.02  | 35190.6   | 83118.62  | 28381.77  | 37165.26  |
| 53720.54  | 53754.14  | 29846.2   | 29558.93  | 80377.04  | 36169.84  | 18316.62  | 82968.71  | 25289.47  | 42855.47  |
| 54842.74  | 52339.05  | 30991     | 21114.66  | 72085.85  | 37613.77  | 21250.74  | 80510.13  | 26797.01  | 35526.42  |
| 60759.79  | 52796.79  | 27622.88  | 24969.13  | 64175.85  | 26936.82  | 42417.05  | 75926.77  | 27263.36  | 37925.55  |
| 58272.58  | 52006.6   | 31681.75  | 25983.95  | 58502.66  | 54396.53  | 33697.11  | 77271.5   | 28713.4   | 37928.8   |

|           |           |           |           |           |           |           |           |           |           |
|-----------|-----------|-----------|-----------|-----------|-----------|-----------|-----------|-----------|-----------|
| LN464.997 | LN464.997 | LN464.997 | LN464.998 |
| 42233.8   | 42974.38  | 41148.69  | 47405.66  | 21201.75  | 85842.71  | 30338.32  | 65489.58  | 32812.67  | 47778.56  |
| 44066.73  | 41852.3   | 42520.36  | 45591.06  | 18876.1   | 57152     | 45349.01  | 56550.85  | 41463.6   | 39879.62  |
| 45225.26  | 40330.11  | 36985.22  | 35850.11  | 17359.8   | 69325.4   | 49604.17  | 65182.51  | 37125.02  | 39468.65  |
| 41726.54  | 43067.25  | 40141.5   | 47638.98  | 19190.72  | 63316.25  | 37426.3   | 55429.82  | 37292.54  | 33463.97  |
| 44832.95  | 39261.36  | 42479.04  | 42510.13  | 17616.49  | 57135.42  | 44008.44  | 54245.91  | 38195.61  | 40377.76  |



|           |           |           |           |           |           |           |           |           |           |
|-----------|-----------|-----------|-----------|-----------|-----------|-----------|-----------|-----------|-----------|
| LN464.999 | LN464.999 | LN464.998 | LN464.998 | LN464.998 | LN464.999 | LN464.998 | LN464.998 | LN464.998 | LN464.998 |
| 14494.43  | 18818.1   | 43848.36  | 40640.59  | 41113.72  | 16740.28  | 77969.35  | 40650     | 36367.07  | 30189.78  |
| 19853.73  | 23552.53  | 48525.69  | 32774.51  | 34015.99  | 14290.69  | 61181.86  | 41153.89  | 53769.64  | 28272.69  |
| 15581.25  | 23955.73  | 51954.21  | 46046.6   | 35916.97  | 15841.34  | 61165.65  | 45301.36  | 45122.28  | 27132.14  |
| 15540.46  | 20496.94  | 53072.36  | 38982.43  | 31937.66  | 15387.62  | 63290.61  | 46412.88  | 48924.46  | 27569.63  |
| 16096.25  | 19964.31  | 47366.48  | 37164.14  | 34757.5   | 13352.08  | 63899.82  | 44584.12  | 51276.4   | 29660.74  |

|           |           |           |           |           |           |           |           |           |           |
|-----------|-----------|-----------|-----------|-----------|-----------|-----------|-----------|-----------|-----------|
| LN464.998 |
| 51004.75  | 24040.31  | 27379.24  | 48287.27  | 30372.1   | 25784.4   | 44158.99  | 41989.62  | 61772.97  | 36111.94  |
| 52269.81  | 27830.32  | 28806.65  | 54966.57  | 40658.3   | 33580.05  | 44249.11  | 47112.76  | 55946.91  | 49205.6   |
| 72565.44  | 24840.97  | 24286.74  | 56374.36  | 46708.87  | 29507.89  | 49217.22  | 42275.47  | 51131.46  | 89030.7   |
| 51313.06  | 30255.85  | 29814.57  | 54360.53  | 41415.06  | 34867.12  | 45380.5   | 46704.26  | 53378.4   | 45466.03  |
| 60786.48  | 31375.68  | 30468.26  | 51828.29  | 35968.95  | 32683.33  | 42034.64  | 43310.81  | 52009.9   | 44665.86  |

|           |           |           |           |           |           |           |           |           |           |
|-----------|-----------|-----------|-----------|-----------|-----------|-----------|-----------|-----------|-----------|
| LN464.998 |
| 55304.91  | 36955.81  | 31076.17  | 58508.1   | 26363.75  | 19780.27  | 27349.64  | 19436.23  | 40536.04  | 41612.64  |
| 42108.69  | 43583.49  | 32919.31  | 54876.21  | 41373.72  | 17806.76  | 28326.01  | 18830.66  | 29549.31  | 30043.35  |
| 56701.76  | 51179.49  | 33575.49  | 51218.73  | 40687.83  | 18266.74  | 43710.82  | 20799.64  | 29423.36  | 30125.86  |
| 40538.84  | 44957.77  | 30667.55  | 60900.75  | 39349.14  | 18678.43  | 28646.65  | 17350.85  | 26737.61  | 27850.45  |
| 42661.75  | 46038.77  | 36834.37  | 63566.17  | 36735.08  | 18547.61  | 26897.94  | 17847.8   | 25177.33  | 29986.23  |

|           |           |           |           |           |           |           |           |           |           |
|-----------|-----------|-----------|-----------|-----------|-----------|-----------|-----------|-----------|-----------|
| LN464.998 |
| 32942.08  | 28726.2   | 84284.68  | 61857.31  | 30250.56  | 16374.61  | 30209.11  | 52333.84  | 41949.3   | 56655.71  |
| 31515.58  | 24784.43  | 53191.07  | 68400.07  | 26598.1   | 12224.72  | 29538.78  | 43949.31  | 29853.31  | 53449.87  |
| 42168.56  | 28134.15  | 74430.51  | 64645.37  | 32856.37  | 12982.03  | 32410.51  | 42520.06  | 29635.4   | 56620.55  |
| 29285.47  | 23089.02  | 54282.87  | 72566.1   | 28924.35  | 14296.25  | 27826.19  | 42308.94  | 30026.82  | 52289.49  |
| 31948.03  | 25575.08  | 62386.29  | 65750.53  | 25801.46  | 14432.2   | 31713.24  | 45754.71  | 29148.9   | 54017.03  |

|           |           |           |           |           |           |           |           |           |           |
|-----------|-----------|-----------|-----------|-----------|-----------|-----------|-----------|-----------|-----------|
| LN464.998 |
| 21856.42  | 19540.37  | 65870.41  | 53961.71  | 35173.61  | 33059.89  | 36648.44  | 27706.6   | 39446.73  | 48334.4   |
| 29469.09  | 32017.69  | 59382.22  | 52007.4   | 30986.09  | 30489.82  | 23228.99  | 25526.22  | 75234.71  | 37626.63  |
| 23883.36  | 19200.13  | 51544.23  | 50533.08  | 27519.81  | 25874.16  | 12389.77  | 20910.09  | 70988.87  | 42399.52  |
| 29087.13  | 31029.38  | 59683.31  | 52812.52  | 28717.71  | 27960.11  | 21103.26  | 24154.2   | 67711.72  | 36864.78  |
| 26863.53  | 27441.23  | 57767.83  | 57997.77  | 31702.04  | 28477.05  | 18808.78  | 23804.33  | 72348.85  | 38134.08  |

|           |           |           |           |           |           |           |           |           |           |
|-----------|-----------|-----------|-----------|-----------|-----------|-----------|-----------|-----------|-----------|
| LN464.998 |
| 25560.3   | 31858.37  | 46082.29  | 30568.03  | 33618.3   | 50998.44  | 22555.91  | 19648.88  | 72676.81  | 61828.64  |
| 23555.52  | 28064.86  | 31300.76  | 27243.22  | 40751.49  | 30884.2   | 21345.95  | 20416.2   | 56337.14  | 35689.13  |
| 32291.03  | 27831.43  | 55768.02  | 34245.7   | 46154.19  | 30595.72  | 22192.33  | 22165.66  | 52120.3   | 25709.77  |
| 24753.87  | 31641.37  | 31107.52  | 30144.03  | 42314.73  | 35034.19  | 22898.78  | 21961.15  | 55762.07  | 36290.84  |
| 28977.71  | 29364.76  | 36498.03  | 25772.64  | 40645.73  | 34437.98  | 21880.28  | 20117.69  | 61445.95  | 32190.53  |

|           |           |           |           |           |           |           |           |           |           |
|-----------|-----------|-----------|-----------|-----------|-----------|-----------|-----------|-----------|-----------|
| LN464.999 | LN464.998 | LN464.998 | LN464.998 | LN464.998 | LN464.999 | LN464.998 | LN464.998 | LN464.998 | LN464.998 |
| 22132.99  | 55383.59  | 44676.93  | 57996.39  | 36661.93  | 13984.58  | 50448.07  | 13465.34  | 36259.96  | 34789.57  |
| 24080.56  | 58075.93  | 39447.93  | 61690.18  | 33326.8   | 17375.83  | 52419.92  | 16264.79  | 35725.74  | 25492.5   |
| 20875.39  | 38569.99  | 37551.04  | 58438.7   | 30952.44  | 17742.63  | 62683.82  | 13426.08  | 37315.6   | 22791.67  |
| 20130.62  | 63640.64  | 37823.47  | 56715.27  | 36702.38  | 18959.61  | 55290.14  | 16221.28  | 38120.76  | 28193.13  |
| 16410.88  | 57945.91  | 32914.19  | 61121.63  | 40011.97  | 17652.9   | 57740.59  | 13388.9   | 37683.45  | 26164.54  |

|           |           |           |           |           |           |           |           |           |           |
|-----------|-----------|-----------|-----------|-----------|-----------|-----------|-----------|-----------|-----------|
| LN464.998 | LN464.998 | LN464.998 | LN465.016 | LN465.035 | LN465.034 | LN465.055 | LN465.055 | LN465.232 | LN465.786 |
| 62590.64  | 67272.88  | 41711.37  | 32182.89  | 66945.82  | 64866.5   | 13987.02  | 18276.94  | 94117.38  | 24459.65  |
| 59033.68  | 37892.84  | 42024.87  | 38073.92  | 67852.53  | 60914.65  | 19157.33  | 15158.09  | 80647.75  | 20906.59  |
| 48521.36  | 53736.29  | 43741.68  | 32338.86  | 68436.07  | 62215.14  | 11824.54  | 14810.69  | 59215     | 21247.07  |
| 60190.81  | 38324     | 47587.42  | 28665.83  | 72686.3   | 64880.08  | 14571.23  | 15955.79  | 73587.82  | 25428.73  |
| 58745.35  | 33943.77  | 43941.86  | 36057.55  | 69561.38  | 60974.09  | 16768.35  | 12430.72  | 75401.96  | 20280.6   |



|           |           |           |           |           |           |           |           |           |           |
|-----------|-----------|-----------|-----------|-----------|-----------|-----------|-----------|-----------|-----------|
| LN465.821 | LN466.234 | LN466.414 | LN466.816 | LN466.976 | LN466.976 | LN466.976 | LN466.976 | LN466.976 | LN467.012 |
| 24647.15  | 17292.47  | 34095.97  | 242758.7  | 49412.37  | 41121.47  | 43625.71  | 62386.49  | 76575.95  | 50761.98  |
| 27879.75  | 13959.26  | 37424.67  | 209814.8  | 54752.52  | 43563.83  | 45827.68  | 54956.6   | 70955.03  | 47037.74  |
| 26228.35  | 16930.85  | 32456.01  | 235016.5  | 49799.66  | 39537.11  | 47552.68  | 58642.8   | 70477.35  | 47092.65  |
| 23065.48  | 16360.7   | 26689.56  | 309696.9  | 54139.64  | 43731.5   | 45712.05  | 63477.33  | 69004.24  | 48985.03  |
| 31996.72  | 14518.34  | 28205.45  | 335079.9  | 51814.94  | 38441.56  | 46636.39  | 58647.2   | 72051.58  | 46482.63  |

|           |           |           |           |           |           |           |           |           |           |
|-----------|-----------|-----------|-----------|-----------|-----------|-----------|-----------|-----------|-----------|
| LN467.012 | LN467.013 | LN467.013 | LN467.013 | LN467.013 | LN467.014 | LN467.013 | LN467.013 | LN467.013 | LN467.013 |
| 45527.38  | 26134.01  | 30815.3   | 19840.92  | 18982.94  | 16057.22  | 48041.55  | 42889.06  | 43496.05  | 39575.81  |
| 46252.03  | 24782.05  | 35529.15  | 18570.57  | 18506.18  | 17204.86  | 51895.8   | 42273.63  | 43301.31  | 40310.52  |
| 43162.59  | 26349.54  | 34263.78  | 18644.94  | 20941.53  | 16797.69  | 44352.03  | 44471.7   | 45348.82  | 38328.83  |
| 42867.48  | 27094.07  | 34894.69  | 18960.88  | 19060.8   | 16471.19  | 48525.91  | 48453.33  | 44923.33  | 37030.96  |
| 56341.31  | 24258.25  | 32734.24  | 19417.27  | 20712.25  | 15582.05  | 47892.91  | 45198.73  | 51449.01  | 43399.22  |

|           |           |           |           |           |           |           |           |           |           |
|-----------|-----------|-----------|-----------|-----------|-----------|-----------|-----------|-----------|-----------|
| LN467.013 |
| 23192.78  | 52275.28  | 51536.36  | 29152.15  | 40455.19  | 37409.76  | 43564.3   | 23983.26  | 23487.93  | 35910.57  |
| 27331.12  | 50690.7   | 52392.27  | 31704.96  | 42878.3   | 34476.97  | 48357.41  | 22218.8   | 25719.48  | 40913.44  |
| 25385.2   | 52079.14  | 47618.38  | 32149.36  | 40307.4   | 34372.93  | 46394.12  | 23438.23  | 25901.7   | 35639.44  |
| 23121.44  | 52779.15  | 44873.85  | 30855.97  | 41336.83  | 33396.67  | 46955.94  | 22524.56  | 26661.85  | 35789.54  |
| 25786.95  | 58620.31  | 49926.51  | 35610.26  | 43777.55  | 35725.92  | 50087.77  | 22267.17  | 27541.45  | 35883.8   |

|           |           |           |           |           |           |           |           |           |           |
|-----------|-----------|-----------|-----------|-----------|-----------|-----------|-----------|-----------|-----------|
| LN467.013 | LN467.014 | LN467.013 |
| 23594.17  | 30267.96  | 49432.29  | 23837     | 55022.56  | 54088.47  | 38419.53  | 59534.56  | 21876.07  | 38237.57  |
| 22177.44  | 28171.19  | 45144.87  | 22436.5   | 53459.48  | 59860.42  | 37658.19  | 56953.26  | 19793.11  | 39600.06  |
| 22133.55  | 29874.2   | 46500.93  | 24909.29  | 53962.49  | 55784.56  | 43909.18  | 59647.88  | 21074.99  | 41137.43  |
| 22324.4   | 32536.25  | 41475.2   | 24939     | 51292.3   | 55934.77  | 39063     | 57440.2   | 19217.91  | 40604.26  |
| 22467.59  | 33305.08  | 57164.03  | 23647.2   | 58791.43  | 64466.06  | 45079.27  | 61831.4   | 20559.76  | 44389.13  |

|           |           |           |           |           |           |           |           |           |           |
|-----------|-----------|-----------|-----------|-----------|-----------|-----------|-----------|-----------|-----------|
| LN467.013 |
| 33996.35  | 34544.67  | 47822.04  | 50135.52  | 25477.43  | 32546.1   | 40283.11  | 28010.95  | 59991.5   | 45520.98  |
| 36759.81  | 36633.07  | 48631.64  | 45998.21  | 24219.04  | 37997.16  | 38558.46  | 27620.78  | 59295.88  | 45238.75  |
| 36178.17  | 35572.12  | 49344.84  | 45938.85  | 23308.59  | 35125.43  | 35036.7   | 26991.66  | 61011.19  | 45459.04  |
| 35945.54  | 35124.64  | 49792.72  | 46878.07  | 24585.42  | 36636.53  | 39255.67  | 27102.59  | 56842.38  | 45217.72  |
| 37078.09  | 35672.89  | 51556.16  | 53937.21  | 26344.82  | 40368.07  | 36300.68  | 26837.01  | 65335.68  | 44617.87  |

|           |           |           |           |           |           |           |           |           |           |
|-----------|-----------|-----------|-----------|-----------|-----------|-----------|-----------|-----------|-----------|
| LN467.013 |
| 56376.94  | 62356.22  | 39389.78  | 33269.2   | 50250.97  | 36171.18  | 48859.1   | 33872.45  | 22011.66  | 22785.54  |
| 53079.63  | 64665.38  | 35181.94  | 30711.51  | 47551.37  | 40586.99  | 52266.74  | 31006.21  | 25626.14  | 20311.72  |
| 51692.81  | 66738.56  | 34261.78  | 31572.29  | 47384.98  | 36912     | 56499.15  | 33146.96  | 23031.11  | 21766.86  |
| 51306.26  | 70568.59  | 34435.73  | 29717.42  | 41677.77  | 35170.13  | 48351.17  | 30686.12  | 22433.37  | 23572.23  |
| 53503.85  | 67551.23  | 40359.41  | 29942.94  | 54688.41  | 36085.82  | 45547.1   | 33442.84  | 24830.56  | 22333.93  |

|           |           |           |           |           |           |           |           |           |           |
|-----------|-----------|-----------|-----------|-----------|-----------|-----------|-----------|-----------|-----------|
| LN467.013 |
| 38339.7   | 40327.84  | 33217.18  | 27566.16  | 62633.93  | 85359.12  | 14194.53  | 24825.9   | 56890.06  | 32834.7   |
| 37836.27  | 39142.85  | 32474.9   | 31621.12  | 68256.07  | 81539.7   | 15484.77  | 26718.59  | 58160.09  | 30412.78  |
| 36134.86  | 43052.87  | 32459.25  | 33189.43  | 67414.5   | 84518.27  | 15189.77  | 24308.28  | 58816.32  | 29597.13  |
| 34846.41  | 41781.97  | 32012.18  | 29312.39  | 60608.07  | 88798.21  | 14823.9   | 25772.27  | 59486.04  | 27779.99  |
| 41024.35  | 41648.6   | 35771.34  | 31895.22  | 62760.46  | 92507.17  | 13710.75  | 28392.17  | 64432.01  | 30311.06  |

|           |           |           |           |           |           |           |           |           |           |
|-----------|-----------|-----------|-----------|-----------|-----------|-----------|-----------|-----------|-----------|
| LN467.013 | LN467.013 | LN467.013 | LN467.013 | LN467.014 | LN467.013 | LN467.013 | LN467.013 | LN467.013 | LN467.014 |
| 62177.96  | 37141.6   | 45893.05  | 39852.54  | 21379.33  | 57591.93  | 38818.23  | 38260.84  | 46517.08  | 17774.29  |
| 65425.41  | 36930.09  | 41680.7   | 40849.21  | 21746.82  | 56685.57  | 39038.97  | 38496.73  | 46029.38  | 20003.49  |
| 63330.08  | 40935.77  | 40939.99  | 39520.08  | 19970.24  | 52881.86  | 41862.54  | 36940.73  | 50545.54  | 18161.38  |
| 65268.62  | 34142.47  | 42323.07  | 43518.84  | 20410.41  | 49095.25  | 37116.08  | 37399.5   | 47642.58  | 16581.51  |
| 70032.04  | 41718.8   | 36905.79  | 43045.63  | 20039.09  | 54228.04  | 45110.72  | 41740.56  | 42218.85  | 16725.1   |



|           |           |           |           |           |           |           |           |           |           |
|-----------|-----------|-----------|-----------|-----------|-----------|-----------|-----------|-----------|-----------|
| LN467.013 | LN467.013 | LN467.013 | LN467.013 | LN467.014 | LN467.013 | LN467.013 | LN467.013 | LN467.013 | LN467.013 |
| 43039.79  | 21864.27  | 34857.38  | 36985.35  | 21148.63  | 18710.56  | 27251.59  | 22220.99  | 56649.61  | 21841.33  |
| 39164.3   | 20558.11  | 30034.53  | 34833.84  | 20647.16  | 18001.89  | 25369.65  | 23218.87  | 56787.55  | 25514.21  |
| 40349.86  | 20588.33  | 30628.73  | 35347.53  | 21093.59  | 19861.84  | 26051.57  | 21934.75  | 58654.16  | 22012.09  |
| 41169.78  | 18689.61  | 28664.87  | 37724.54  | 21571.25  | 17584.59  | 25252.91  | 21775.35  | 59670.42  | 22480.36  |
| 48445.89  | 21697.59  | 31279.32  | 42871.06  | 19412.17  | 20483.16  | 27183.69  | 24775.82  | 64288.52  | 23996.38  |

|           |           |           |           |           |           |           |           |           |           |
|-----------|-----------|-----------|-----------|-----------|-----------|-----------|-----------|-----------|-----------|
| LN467.014 | LN467.014 | LN467.013 | LN467.032 |
| 20502.76  | 16396.49  | 40333.65  | 55590.95  | 48899.59  | 27699.37  | 38721.95  | 57717     | 26097.34  | 78577.3   |
| 21189.94  | 16345.38  | 38285.96  | 60691.24  | 46223.02  | 24736.54  | 35550.69  | 64563.14  | 25869.03  | 66846.07  |
| 18162.8   | 18564.68  | 38769.23  | 57637.13  | 46928.44  | 24675.02  | 36205.76  | 60681.44  | 25061.48  | 32748.19  |
| 19236.66  | 16215.36  | 41614.16  | 63008.11  | 49516.74  | 27321.8   | 32421.7   | 65609.13  | 24923.26  | 29805.05  |
| 19192.56  | 13728.68  | 40613.79  | 60497.61  | 48624.98  | 25685.16  | 39208.94  | 60352.9   | 25923.04  | 75442.84  |

|           |           |           |           |           |           |           |           |           |           |           |
|-----------|-----------|-----------|-----------|-----------|-----------|-----------|-----------|-----------|-----------|-----------|
| LN467.032 | LN467.033 | LN467.249 | LN467.249 | LN467.249 |
| 62168.59  | 59215.3   | 57758.44  | 54557.56  | 57529.97  | 73757.69  | 64365.96  | 24417     | 23746.08  | 29810.05  |           |
| 60736.51  | 55933.42  | 58662.71  | 61799.31  | 56716.39  | 73549.09  | 60272.67  | 22489.24  | 23096.55  | 25672.68  |           |
| 61130.22  | 60872.68  | 55804.07  | 54895.29  | 52336.45  | 71745.18  | 58925.9   | 23010.87  | 21868.97  | 27058     |           |
| 26947.19  | 54819.99  | 57591.02  | 52067.42  | 55935.49  | 67980.07  | 56470.72  | 26001.94  | 20842.18  | 26794.06  |           |
| 68439.55  | 56439.45  | 62545.49  | 57439.34  | 50864.1   | 69083.63  | 49878.52  | 22376.96  | 20859.77  | 24275.9   |           |

|           |           |           |           |           |           |           |           |           |           |
|-----------|-----------|-----------|-----------|-----------|-----------|-----------|-----------|-----------|-----------|
| LN467.249 | LN467.800 | LN467.819 | LN468.816 | LN468.992 | LN468.992 | LN468.992 | LN468.992 | LN468.992 | LN468.992 |
| 29885.79  | 27964.8   | 28002.91  | 79587.87  | 23009.75  | 37735.74  | 30965.14  | 34149.5   | 23098.13  | 28937.36  |
| 26697.36  | 24615.66  | 24274.48  | 84932.43  | 23445.1   | 35883.86  | 29637.88  | 34423.75  | 22337.6   | 28716.81  |
| 24972.82  | 26526.33  | 26871.12  | 65548.08  | 23947.07  | 38861.04  | 29826.37  | 34534.25  | 23541.09  | 32083.57  |
| 27431.63  | 32785.13  | 30616.21  | 57223.65  | 23574.91  | 40083.04  | 35185.68  | 36778.17  | 20719.2   | 30526.01  |
| 28767.17  | 28891.61  | 36187.02  | 75096.32  | 23170.78  | 38123.92  | 32391.56  | 34011.65  | 20090.44  | 28949.55  |

|           |           |           |           |           |           |           |           |           |           |
|-----------|-----------|-----------|-----------|-----------|-----------|-----------|-----------|-----------|-----------|
| LN468.992 | LN468.992 | LN468.991 | LN468.992 | LN468.992 | LN468.992 | LN468.992 | LN468.992 | LN468.991 | LN468.992 |
| 27326.19  | 36006.53  | 57550.83  | 44059.31  | 27408.42  | 34423.68  | 48837.2   | 57351.81  | 81477.54  | 25491.74  |
| 28062.45  | 33738.47  | 61424.81  | 46541.15  | 32449.79  | 34719     | 58042.58  | 60767.98  | 81939.2   | 25890.17  |
| 27665.75  | 34527.53  | 62165.17  | 44376.37  | 29374.77  | 34077.72  | 56600.24  | 56032.72  | 71087.29  | 26632.91  |
| 25182.03  | 34346.41  | 61927.48  | 46263.33  | 27896.1   | 34180.48  | 50422.17  | 61628.11  | 83493.94  | 26309.44  |
| 26308.19  | 31294.77  | 64558.84  | 41545.01  | 26619.87  | 33206.6   | 53298.04  | 59291.48  | 79978.19  | 28219.2   |

|           |           |           |           |           |           |           |           |           |           |
|-----------|-----------|-----------|-----------|-----------|-----------|-----------|-----------|-----------|-----------|
| LN468.992 | LN468.992 | LN468.992 | LN468.992 | LN468.992 | LN468.991 | LN468.992 | LN468.991 | LN468.992 | LN468.992 |
| 33916.62  | 46834.32  | 41889.41  | 19674.56  | 53684.14  | 61372.73  | 21652.57  | 65775.57  | 33274.56  | 42590.71  |
| 35089.79  | 49730.99  | 43111.16  | 15810.27  | 51309.9   | 58640.84  | 23254.47  | 61598.55  | 33924.2   | 41725.46  |
| 32108.32  | 45851.18  | 43239.57  | 15250.13  | 57073.63  | 62913.13  | 21893.53  | 68437.97  | 31983.33  | 39491.32  |
| 33513.15  | 46452.63  | 43691.73  | 17597.94  | 51444.62  | 57730.75  | 21560.8   | 64384.21  | 38456.72  | 44317.84  |
| 31873.76  | 47288.99  | 41529.56  | 18010.58  | 57045.21  | 57177.13  | 20289.2   | 68386.39  | 34219.28  | 39848.69  |

|           |           |           |           |           |           |           |           |           |           |
|-----------|-----------|-----------|-----------|-----------|-----------|-----------|-----------|-----------|-----------|
| LN468.992 |
| 32336.38  | 18915.46  | 80379.95  | 20538.08  | 26097.96  | 52870.53  | 37957.23  | 31035.44  | 33971.14  | 29002.95  |
| 28870.37  | 19778.05  | 77015.56  | 21406     | 29599.16  | 57052.23  | 33492.54  | 28559.24  | 34367.94  | 25698.87  |
| 31815.66  | 17682.48  | 80219.82  | 21133.14  | 28577.08  | 55549.47  | 39330.76  | 35208.23  | 35632.76  | 27569     |
| 33217.79  | 18257.16  | 76392.43  | 18344.57  | 28324.75  | 63385.96  | 36359.99  | 34816.73  | 33337.19  | 26650.18  |
| 32268.16  | 17234.47  | 75314.02  | 19681.75  | 26205.21  | 53850.71  | 38971.58  | 31792.36  | 32195.93  | 26734.16  |

|           |           |           |           |           |           |           |           |           |           |
|-----------|-----------|-----------|-----------|-----------|-----------|-----------|-----------|-----------|-----------|
| LN468.992 | LN468.992 | LN468.991 | LN468.992 |
| 34650.41  | 32172.19  | 54371.3   | 34330.35  | 58066.23  | 58157.6   | 42870.04  | 34563.49  | 25999.44  | 65361.44  |
| 33347.8   | 32443.48  | 57755.08  | 39106.53  | 52416.43  | 61046.5   | 42533.19  | 34274.78  | 26555.49  | 66936.92  |
| 34782.41  | 29889.35  | 59921.22  | 35967.77  | 54842.72  | 57781.99  | 37880.52  | 35168.32  | 24682.11  | 65723.35  |
| 33117.69  | 31982.8   | 58204.41  | 36180.57  | 56335.77  | 58833.91  | 44199.03  | 35528.6   | 25330.81  | 64504.29  |
| 35566.62  | 30668.37  | 57384.92  | 36027.2   | 53694.57  | 60471.86  | 40624.43  | 32841.39  | 24190.49  | 61791.19  |



|           |           |           |           |           |           |           |           |           |           |
|-----------|-----------|-----------|-----------|-----------|-----------|-----------|-----------|-----------|-----------|
| LN468.992 |
| 23831.04  | 43967.76  | 40929.75  | 26295.37  | 65651.94  | 44517.56  | 42503.6   | 38794.7   | 36225.23  | 28793.2   |
| 29731.75  | 46252.02  | 40780.25  | 25086.85  | 65814.81  | 45639.97  | 38845.22  | 36438.8   | 34232.68  | 30870.63  |
| 31227.38  | 46235.69  | 42004.32  | 26343.67  | 63317.56  | 45300.2   | 40754.43  | 38110.67  | 37763.63  | 35247.6   |
| 27022.9   | 48481.29  | 42564.92  | 27413.36  | 65020.85  | 43058.94  | 40775.7   | 37628.64  | 35071.42  | 33822.89  |
| 26210.52  | 45772     | 40182.78  | 25885     | 65475.63  | 42354.44  | 36864.71  | 38694.83  | 33813.54  | 34130.2   |

|           |           |           |           |           |           |           |           |           |           |
|-----------|-----------|-----------|-----------|-----------|-----------|-----------|-----------|-----------|-----------|
| LN468.992 | LN468.991 |
| 33293.18  | 25977.25  | 93328.86  | 48079.13  | 36215.33  | 33186.19  | 19523.82  | 17321.92  | 48500.06  | 68561.52  |
| 32709.49  | 27197.9   | 92502.83  | 48405.42  | 40863.22  | 31999.26  | 20069.28  | 17685.64  | 45798.48  | 67413.89  |
| 34888.46  | 28562.81  | 97081.98  | 45682.87  | 37654.54  | 32527.5   | 18978.37  | 16532.54  | 48770.74  | 70664.82  |
| 29946.12  | 26934.73  | 92984.56  | 47896.59  | 38594.54  | 33902.09  | 19138.37  | 17031.79  | 47756.06  | 70564.11  |
| 33335.04  | 27855.44  | 90989.9   | 46853.75  | 36435.95  | 28834.47  | 19632.82  | 16265.69  | 49160.09  | 65563.71  |

|           |           |           |           |           |           |           |           |           |           |
|-----------|-----------|-----------|-----------|-----------|-----------|-----------|-----------|-----------|-----------|
| LN468.991 | LN468.991 | LN468.992 |
| 66967.05  | 37420.11  | 17694.05  | 48007.58  | 34744.97  | 30773.34  | 31062.85  | 19748.99  | 27306.44  | 40405.05  |
| 64419.43  | 40981.21  | 15668.43  | 50923.13  | 34459.76  | 31938.4   | 27144.23  | 20047.87  | 26526.4   | 40131.52  |
| 70238.77  | 39656.52  | 18544.94  | 48141.05  | 33022.74  | 28549.38  | 26278.72  | 19440.35  | 25271.13  | 37112.22  |
| 66944.72  | 38730.43  | 17706.74  | 49673.46  | 32392.7   | 31217.85  | 31435.7   | 18960.8   | 25951.47  | 41641.49  |
| 70041.22  | 40204.73  | 18080.69  | 49495.13  | 34827.71  | 31925.9   | 30009.11  | 19389.27  | 26447.66  | 37420.95  |

|           |           |           |           |           |           |           |           |           |           |
|-----------|-----------|-----------|-----------|-----------|-----------|-----------|-----------|-----------|-----------|
| LN468.992 | LN468.993 | LN468.993 |
| 36654.37  | 47212.7   | 56307.38  | 65641.88  | 40957.94  | 48311.3   | 53292.2   | 19326.55  | 38280.95  | 27776.69  |
| 36908.84  | 47721.9   | 56077.08  | 67878.58  | 37464.84  | 49033.11  | 61529.22  | 19639.41  | 37097.56  | 29489.83  |
| 36685.83  | 49294.85  | 53879.24  | 72729.43  | 40437.02  | 49484.11  | 58568.35  | 18250.07  | 43328.81  | 27757.7   |
| 38261.2   | 45524.7   | 54530.73  | 60507.1   | 41388.3   | 52877.13  | 56369.03  | 19030.93  | 40654.68  | 29842.01  |
| 36269.23  | 46167.59  | 54423.55  | 61885.75  | 38721.6   | 48050.37  | 54124.17  | 19733.59  | 41638.04  | 25612.22  |

|           |           |           |           |           |           |           |           |           |           |
|-----------|-----------|-----------|-----------|-----------|-----------|-----------|-----------|-----------|-----------|
| LN468.992 | LN468.993 | LN468.993 | LN469.010 | LN469.010 | LN469.028 | LN469.150 | LN469.781 | LN470.153 | LN470.764 |
| 23330     | 37676.13  | 25531.3   | 36383.7   | 36231.18  | 44904.33  | 90963.42  | 48212.73  | 16198.99  | 28583.2   |
| 24747.72  | 35322     | 23992.04  | 35890.92  | 40584.9   | 49930.73  | 87477.59  | 75737.19  | 16808.1   | 28611.39  |
| 24647.11  | 38542.42  | 25348.2   | 38868.68  | 40049.53  | 54645.2   | 104631.3  | 53743.56  | 15674.19  | 28207     |
| 22721.39  | 38061.9   | 22459.02  | 38905.09  | 33756.58  | 44518.24  | 77787.96  | 62694     | 14199.82  | 31928.85  |
| 25075.66  | 35809.8   | 25058.23  | 42896.7   | 36125.19  | 47764.13  | 82726.08  | 52595.96  | 13374.02  | 36095.77  |

|           |           |           |           |           |           |           |           |           |           |
|-----------|-----------|-----------|-----------|-----------|-----------|-----------|-----------|-----------|-----------|
| LN470.812 | LN470.837 | LN471.150 | LN471.181 | LN471.294 | LN471.311 | LN471.763 | LN471.836 | LN472.759 | LN472.833 |
| 33267.18  | 33808.82  | 29905.01  | 29502.13  | 10828.03  | 8741.41   | 21428.11  | 23451.97  | 102746.3  | 265176.3  |
| 33231.18  | 31853.31  | 27288.4   | 30517.79  | 10155.16  | 8386.628  | 19613.98  | 18837.29  | 88898.56  | 245989.2  |
| 34339.88  | 41900.91  | 28942.1   | 28009.73  | 10378.85  | 8851.148  | 21504.36  | 20821.75  | 101941.1  | 337374.6  |
| 37443.35  | 32923.82  | 25345.81  | 27068.23  | 12352.76  | 9516.608  | 22148.09  | 23244.08  | 122936.2  | 343443    |
| 42642.93  | 39034.1   | 23478.71  | 27758.2   | 11946.34  | 9560.189  | 21313.28  | 23397.98  | 139788.6  | 377862.9  |

|           |           |           |           |           |           |           |           |           |           |
|-----------|-----------|-----------|-----------|-----------|-----------|-----------|-----------|-----------|-----------|
| LN472.916 |
| 19545.83  | 21495.31  | 26281.23  | 15311.57  | 22583.1   | 21106.18  | 21660.39  | 22377.67  | 32634.87  | 28185.45  |
| 20718.8   | 23858.82  | 27518.27  | 17559.3   | 25444.97  | 20746.86  | 24205.06  | 24099.1   | 32974.35  | 29161.49  |
| 19082.08  | 20162.14  | 26546.12  | 15191.69  | 26097.32  | 18608.99  | 26676.77  | 22677.92  | 32560.2   | 27814.71  |
| 17481.91  | 21479.79  | 24825.17  | 13598.71  | 26192.54  | 18977.16  | 22170.47  | 22571.33  | 33010.68  | 27260.15  |
| 13025.35  | 19937.48  | 21841.78  | 13623.83  | 27088.21  | 19035.19  | 23438.11  | 19955.58  | 27478.48  | 26682.07  |

|           |           |           |           |           |           |           |           |           |           |
|-----------|-----------|-----------|-----------|-----------|-----------|-----------|-----------|-----------|-----------|
| LN472.916 | LN472.916 | LN473.003 | LN473.004 |
| 27984.09  | 17310.73  | 82583.32  | 103142.8  | 46578.32  | 39285.82  | 106491.1  | 20487.9   | 134842.4  | 114225.3  |
| 30072.69  | 19556.05  | 85490.6   | 86727.24  | 60278.79  | 63717.98  | 85008     | 17238.17  | 105141.7  | 111961.5  |
| 26377.45  | 15637.74  | 122507.9  | 87813.24  | 58231.88  | 67995.05  | 93570.81  | 37235.19  | 68150.93  | 104750.4  |
| 26582.49  | 17861.01  | 78846.72  | 86494.53  | 44470.86  | 43047.34  | 79381.69  | 18410.26  | 93161.5   | 182514.9  |
| 26099.39  | 17327.69  | 72877.74  | 78977.03  | 84339.82  | 34617.39  | 118808.4  | 16050.06  | 84237.81  | 129626.9  |



|           |           |           |           |           |           |           |           |           |           |
|-----------|-----------|-----------|-----------|-----------|-----------|-----------|-----------|-----------|-----------|
| LN473.004 |
| 70879.12  | 84101.93  | 40756.12  | 65044.25  | 102237.5  | 30212.39  | 40535.97  | 85653.98  | 69541.4   | 78032.96  |
| 91988.45  | 111182.4  | 60080.64  | 73128.55  | 68415.07  | 44063.63  | 52074.77  | 74101.25  | 53044.96  | 70427.13  |
| 62890.54  | 97274.78  | 38170.04  | 41318.06  | 79029.98  | 35229.64  | 41680.8   | 84336.71  | 51760.87  | 70397.41  |
| 92483.91  | 68237.98  | 58125.77  | 81371.16  | 89554.23  | 44430.61  | 51757.08  | 79582.82  | 56867.6   | 88330.41  |
| 64397.71  | 112327.2  | 47259.06  | 48486.46  | 109543.7  | 30350.63  | 53799     | 52304.83  | 52212.27  | 76714.09  |

|           |           |           |           |           |           |           |           |           |           |
|-----------|-----------|-----------|-----------|-----------|-----------|-----------|-----------|-----------|-----------|
| LN473.003 | LN473.004 |
| 133756.9  | 49382.22  | 43693.09  | 116714.9  | 138064.9  | 25571.48  | 85682.82  | 89109.03  | 34125.77  | 58384.08  |
| 137734.8  | 58675.02  | 56993.42  | 127199.9  | 120566    | 31891.29  | 118970.1  | 61290.15  | 47272.19  | 68622.8   |
| 129193.8  | 54911.91  | 34931.61  | 83952.05  | 129855.1  | 29926.36  | 78851.13  | 100175.1  | 31505.99  | 92936.89  |
| 174479.6  | 47531.52  | 76930.8   | 185574.3  | 80623.82  | 36793.94  | 118199.4  | 67238.55  | 34068.27  | 77045.03  |
| 148195.8  | 48798.1   | 36793.57  | 76165.01  | 126522    | 32305.21  | 106281.6  | 111747    | 33948.03  | 68450.51  |

|           |           |           |           |           |           |           |           |           |           |
|-----------|-----------|-----------|-----------|-----------|-----------|-----------|-----------|-----------|-----------|
| LN473.003 | LN473.004 |
| 126423.2  | 69592.5   | 35281.76  | 104061.9  | 76435.3   | 81141.04  | 70055.29  | 49900.58  | 97718.57  | 100491.3  |
| 122732.7  | 108269.2  | 35543.01  | 144126.5  | 126057.5  | 67111.59  | 147904.4  | 59287.08  | 101119.1  | 78153.26  |
| 153291.3  | 80258.14  | 37331.82  | 91151.9   | 87494.42  | 86865.25  | 84659.16  | 38214.77  | 88536.74  | 76313.28  |
| 141405.9  | 96747.83  | 35333.87  | 113456.2  | 107688.6  | 86492.79  | 82005.11  | 65219.48  | 83540.08  | 109275.2  |
| 116572.5  | 80571.93  | 43771.48  | 123863.9  | 80045.51  | 70639.17  | 101562.2  | 45690.93  | 107735    | 70199.57  |

|           |           |           |           |           |           |           |           |           |           |
|-----------|-----------|-----------|-----------|-----------|-----------|-----------|-----------|-----------|-----------|
| LN473.004 | LN473.004 | LN473.004 | LN473.003 | LN473.004 | LN473.004 | LN473.004 | LN473.004 | LN473.004 | LN473.004 |
| 28162.68  | 80473.52  | 62214.49  | 144404.2  | 48013.51  | 32493.9   | 92736.48  | 47855.54  | 69804.35  | 45967.75  |
| 30432.18  | 84995.75  | 67641.43  | 116312.5  | 57919.84  | 45548.55  | 49089.67  | 40240.48  | 99569.04  | 57646.85  |
| 33337.39  | 106112.4  | 55729.41  | 188511.7  | 71109.34  | 24166.44  | 58283.43  | 61448.62  | 110019.5  | 62184.74  |
| 33054.49  | 91458.61  | 47007.28  | 123121.5  | 65588.95  | 22434.42  | 44215.31  | 40395.63  | 92905.47  | 76175.44  |
| 22869.74  | 88629.17  | 49759.98  | 121098.6  | 73590.96  | 21834.46  | 44034.52  | 62699.6   | 101307.6  | 42961.05  |

|           |           |           |           |           |           |           |           |           |           |
|-----------|-----------|-----------|-----------|-----------|-----------|-----------|-----------|-----------|-----------|
| LN473.004 |
| 143067.8  | 57930.88  | 112125.1  | 103882.6  | 59638.18  | 27079.81  | 77700.64  | 64621.39  | 74851.1   | 64057.84  |
| 100680.2  | 57954.66  | 132435    | 107550.5  | 55119.21  | 36517.29  | 57128.42  | 54074.7   | 72077.3   | 64242.76  |
| 123445.2  | 81404.74  | 84134.19  | 84614.12  | 60749.61  | 31057.21  | 81585.44  | 66721.98  | 59141.9   | 90155.78  |
| 114782.5  | 66104.8   | 58267.68  | 87235.44  | 46197.4   | 36229.59  | 62757.24  | 90235.28  | 62939.18  | 68566.64  |
| 158473.3  | 74976.51  | 72235.43  | 55852.58  | 56984.53  | 31839.15  | 67361.95  | 61258.72  | 74361.64  | 72903.37  |

|           |           |           |           |           |           |           |           |           |           |
|-----------|-----------|-----------|-----------|-----------|-----------|-----------|-----------|-----------|-----------|
| LN473.004 |
| 61659.47  | 29563.79  | 70843.83  | 68797.57  | 49812.08  | 69215.32  | 105827.3  | 71829.93  | 92297.91  | 72969.4   |
| 36989.32  | 30206.91  | 70467.96  | 61834.91  | 59082.17  | 83366.27  | 110276.1  | 51073.98  | 93409.3   | 51830.29  |
| 38119.79  | 31269.95  | 63600.59  | 62127.77  | 43295.26  | 48670.5   | 105986    | 53711.52  | 96088.38  | 48818.95  |
| 63312.69  | 27862.74  | 75454.97  | 55053.68  | 60810.73  | 61783.4   | 91244.96  | 50623.25  | 103137.5  | 49361.5   |
| 52399.02  | 29237.57  | 64990.04  | 56223.19  | 55498.65  | 76407.74  | 106775.3  | 68839.77  | 74757.3   | 48120.67  |

|           |           |           |           |           |           |           |           |           |           |
|-----------|-----------|-----------|-----------|-----------|-----------|-----------|-----------|-----------|-----------|
| LN473.004 | LN473.003 |
| 44261.75  | 80288.08  | 75156.86  | 30559.3   | 67378.01  | 87373.09  | 64051.6   | 52808.17  | 47223.24  | 138267.8  |
| 64787.3   | 77751.3   | 66254.55  | 30804.41  | 70208.13  | 94919.53  | 61711.81  | 86228.06  | 53797.58  | 114349.8  |
| 51052.26  | 105807.6  | 84661.55  | 25941.09  | 84633.98  | 113878.3  | 55216.57  | 46912.11  | 57141.26  | 136582.8  |
| 46218.3   | 78563.05  | 65026.62  | 43894.61  | 69745.53  | 70113.81  | 84074.49  | 58035.13  | 50159.69  | 94582.43  |
| 47200.64  | 88654.56  | 68387.53  | 31897.38  | 67906.96  | 69634.59  | 56382.06  | 80451.37  | 57394.65  | 129514    |

|           |           |           |           |           |           |           |           |           |           |
|-----------|-----------|-----------|-----------|-----------|-----------|-----------|-----------|-----------|-----------|
| LN473.004 | LN473.004 | LN473.004 | LN473.003 | LN473.004 | LN473.004 | LN473.004 | LN473.004 | LN473.270 | LN473.282 |
| 37633.65  | 209071.3  | 88153.07  | 123380.6  | 75819.99  | 52562     | 61624.24  | 33586.25  | 12189.25  | 103591.2  |
| 23318.94  | 102481.8  | 114702    | 128630.5  | 67873.65  | 53710.65  | 71682.99  | 21940.37  | 13768.43  | 86091.69  |
| 21522.64  | 118871.6  | 95478.92  | 120234.1  | 70027.11  | 57145.81  | 85584.33  | 29644.3   | 13005.6   | 81836.34  |
| 22752.56  | 109397.3  | 85515.13  | 134604.9  | 69416.97  | 61809.05  | 80336.99  | 28649.91  | 12052.98  | 77479.34  |
| 19100.75  | 103307    | 83453.95  | 118001.4  | 69332.33  | 54585.12  | 59631.87  | 19562.6   | 11055.53  | 87778.52  |



|           |           |           |           |           |           |           |           |           |           |
|-----------|-----------|-----------|-----------|-----------|-----------|-----------|-----------|-----------|-----------|
| LN473.282 | LN473.762 | LN473.835 | LN474.192 | LN474.286 | LN474.286 | LN474.759 | LN474.833 | LN474.982 | LN474.982 |
| 52316     | 27969.3   | 27136.15  | 52854.47  | 28702.7   | 17537.39  | 64505.07  | 121910.6  | 40255.38  | 45164.97  |
| 42159.83  | 26849.49  | 32147.98  | 56348.75  | 29803.12  | 19268.27  | 63115.15  | 126809.9  | 40077.38  | 46573.07  |
| 61204.98  | 25636.82  | 24472.54  | 50216.93  | 25601.84  | 21709.73  | 76468.19  | 108191.4  | 39603.19  | 44025.5   |
| 59759.85  | 31732.73  | 32989.72  | 53434.96  | 24496.92  | 14727.31  | 79118.77  | 151821.8  | 38586.54  | 42117.62  |
| 49219.03  | 35234.23  | 37724.18  | 48395.09  | 25350.85  | 15988.54  | 91498.07  | 87913.08  | 40748.2   | 41730.94  |

|           |           |           |           |           |           |           |           |           |           |
|-----------|-----------|-----------|-----------|-----------|-----------|-----------|-----------|-----------|-----------|
| LN474.982 | LN474.982 | LN474.983 | LN474.983 | LN474.983 | LN474.983 | LN474.983 | LN474.983 | LN475.039 | LN475.039 |
| 32003.25  | 50663.49  | 47764.62  | 44560.24  | 57733.11  | 34194.1   | 35056.18  | 38724.86  | 32674.49  | 55308.45  |
| 30426.29  | 48802.03  | 45353.2   | 49215.45  | 56401.02  | 36363.53  | 31107.28  | 35875.2   | 37381     | 48487.39  |
| 30119.18  | 49669.2   | 43707.76  | 48228.74  | 55717.69  | 31399.45  | 31805.5   | 37529.02  | 33030.24  | 46647.74  |
| 31756.27  | 44247.84  | 41902.09  | 45665.48  | 54466.88  | 31628.44  | 32003.16  | 36821.77  | 35828.52  | 46774.65  |
| 31472.72  | 52170.32  | 41331.07  | 43657.36  | 51466.85  | 31156.24  | 28279.07  | 35528.08  | 32991.34  | 41503.27  |

|           |           |           |           |           |           |           |           |           |           |
|-----------|-----------|-----------|-----------|-----------|-----------|-----------|-----------|-----------|-----------|
| LN475.195 | LN475.217 | LN475.217 | LN475.217 | LN475.217 | LN475.761 | LN475.834 | LN476.759 | LN476.775 | LN476.830 |
| 14642.62  | 23280.71  | 23759.89  | 27760.47  | 22167.64  | 15201.25  | 14073.54  | 20533.97  | 143762.7  | 127766.7  |
| 14385.38  | 21829.03  | 27785.06  | 24621.59  | 23070.08  | 13503.72  | 17818.91  | 21161.6   | 133721.1  | 57284.54  |
| 15416.79  | 21230.14  | 23240.77  | 26687.35  | 21839.65  | 15029.58  | 11874.99  | 19628.61  | 140605.1  | 125636.3  |
| 13976.21  | 23956.87  | 23814.38  | 26412.17  | 21595.44  | 12346.94  | 12829.47  | 18503.05  | 168195.8  | 164764.3  |
| 14869.49  | 23341.15  | 23852.2   | 27038.34  | 21844.77  | 14857.85  | 13990.85  | 21615.86  | 194977.4  | 81351.76  |

|           |           |           |           |           |           |           |           |           |           |
|-----------|-----------|-----------|-----------|-----------|-----------|-----------|-----------|-----------|-----------|
| LN477.035 | LN477.035 | LN477.035 | LN477.035 | LN477.035 | LN477.197 | LN477.197 | LN477.778 | LN478.776 | LN478.865 |
| 39251.61  | 45844     | 45018.1   | 29988.96  | 31072.82  | 44898.95  | 62307.03  | 18250.45  | 46347.53  | 29436.11  |
| 36501.63  | 39958.73  | 51268.65  | 32828.71  | 32774.2   | 44314.58  | 65021.34  | 13822.75  | 41099.69  | 28374.51  |
| 37116.97  | 46162.71  | 47370.28  | 28079.69  | 34736.44  | 47342.8   | 59894.52  | 14215.8   | 45679.3   | 27245.53  |
| 41222.28  | 46925.62  | 51981.24  | 35584.64  | 36357.69  | 52629.29  | 61008.99  | 19272.24  | 44417.01  | 27091.37  |
| 38691.84  | 47625.9   | 50860.22  | 29517.39  | 32973.04  | 53243.69  | 62484.03  | 22522.6   | 63875.78  | 26267.34  |

|           |           |           |           |           |           |           |           |           |           |
|-----------|-----------|-----------|-----------|-----------|-----------|-----------|-----------|-----------|-----------|
| LN478.865 | LN478.865 | LN478.866 | LN478.865 | LN478.865 | LN478.865 | LN478.866 | LN478.865 | LN478.866 | LN478.866 |
| 26497.02  | 21824.9   | 29506.88  | 33191.98  | 22387.16  | 30866.21  | 31948.78  | 28571.65  | 26189.12  | 22083.92  |
| 28688.27  | 18042.94  | 31613.75  | 33050.08  | 21395.14  | 25625.14  | 35402.26  | 25584.9   | 27683.81  | 22490.17  |
| 26483.38  | 20512.76  | 25676.47  | 35655.78  | 20429.54  | 25862.91  | 33287.88  | 28184.93  | 25411.24  | 20216.41  |
| 29152.67  | 19397.58  | 27502.52  | 33618.45  | 22697.35  | 25259.39  | 29743.11  | 29589.38  | 23706.45  | 23765.74  |
| 27179.35  | 19020.91  | 28696.86  | 33586.85  | 19866.07  | 28256.91  | 35598.83  | 25242.61  | 23765.97  | 20183.6   |

|           |           |           |           |           |           |           |           |           |           |
|-----------|-----------|-----------|-----------|-----------|-----------|-----------|-----------|-----------|-----------|
| LN478.866 | LN478.865 | LN478.866 | LN478.865 | LN478.865 | LN478.865 | LN478.865 | LN478.866 | LN478.866 | LN478.865 |
| 29312.9   | 32970.87  | 25297.11  | 35802.76  | 30279.09  | 26267.22  | 38259.32  | 22857.55  | 34359.21  | 19677.28  |
| 25924.83  | 29997.05  | 25241.22  | 40667.79  | 29976.64  | 25399.86  | 36913.49  | 21921.63  | 36846.44  | 21831.04  |
| 26827.11  | 30539.5   | 27060.87  | 34065.29  | 28389.67  | 23942.63  | 34857.94  | 20919.66  | 31522.6   | 20114.68  |
| 26827.51  | 31406.89  | 24854.51  | 34074.17  | 26890.75  | 25562.08  | 32166.57  | 21410.67  | 36712.39  | 20342.41  |
| 26200.39  | 28518.83  | 26330.35  | 36695.77  | 28386.14  | 26235.26  | 34195.31  | 20866.12  | 33057.03  | 22675.29  |

|           |           |           |           |           |           |           |           |           |           |
|-----------|-----------|-----------|-----------|-----------|-----------|-----------|-----------|-----------|-----------|
| LN478.865 | LN478.866 | LN478.866 | LN478.866 | LN479.177 | LN479.194 | LN479.212 | LN479.212 | LN479.213 | LN479.213 |
| 39420.79  | 30981.15  | 35374.29  | 28488.87  | 13654.95  | 15258.45  | 38462.61  | 24483.05  | 31048.33  | 22887.79  |
| 35217.72  | 31877.59  | 39383.63  | 26633.74  | 12769.87  | 11550.54  | 41831.19  | 23142.15  | 28533.57  | 25310.48  |
| 37800.05  | 29941.01  | 41828.01  | 27399.67  | 14063.44  | 14390.88  | 38366.26  | 21407.26  | 27201.54  | 22902.6   |
| 34172.22  | 30014.17  | 39159.72  | 31118.79  | 12889.97  | 12993.47  | 39269.56  | 23117.98  | 27665.09  | 23477.12  |
| 34857.79  | 32243.83  | 36699.17  | 28297.23  | 11126.74  | 11800.25  | 40047.58  | 19862.99  | 28745     | 21674.54  |

|           |           |           |           |           |           |           |           |           |           |
|-----------|-----------|-----------|-----------|-----------|-----------|-----------|-----------|-----------|-----------|
| LN479.224 | LN479.249 | LN479.797 |
| 39216.16  | 18641     | 14865.52  | 28872.16  | 25209.38  | 19669.76  | 25444.28  | 27621.07  | 23440.48  | 20226.69  |
| 48941.3   | 14969.88  | 15991.91  | 31206.7   | 26674.43  | 19736.08  | 27040.9   | 24199.85  | 19489.27  | 18227.3   |
| 65957.76  | 16243.25  | 14368.82  | 30123.99  | 25828.66  | 20337.68  | 23696.18  | 23619.34  | 21349.74  | 21966.44  |
| 74444.87  | 15535.92  | 15444.29  | 31210.67  | 23533.42  | 21743.39  | 25910.72  | 24048.56  | 22961.37  | 23578.74  |
| 84068.16  | 17064.34  | 13860.37  | 28758.7   | 22256.67  | 20677.57  | 21719.72  | 22646.41  | 22524     | 29453.82  |



|           |           |           |           |           |           |           |           |           |           |
|-----------|-----------|-----------|-----------|-----------|-----------|-----------|-----------|-----------|-----------|
| LN480.793 | LN481.209 | LN482.212 | LN482.788 | LN482.988 | LN482.988 | LN482.988 | LN482.988 | LN482.989 | LN483.007 |
| 304956.9  | 169263.6  | 27386.53  | 1619009   | 51619.34  | 58261.92  | 67900.13  | 33977.19  | 57648.94  | 47848.46  |
| 247548.1  | 168772.3  | 26591.95  | 1301794   | 49584.7   | 58333.01  | 60338.65  | 34866.12  | 68343.3   | 49650.79  |
| 283995.6  | 153174.4  | 28547.61  | 1409867   | 52205.65  | 54670.95  | 61232.34  | 31733.93  | 65392.38  | 51524.66  |
| 347741.7  | 141490.3  | 23291.35  | 1778856   | 53575.2   | 57056.22  | 61704.73  | 35710.84  | 67620.47  | 46165.54  |
| 417647.5  | 162438.4  | 25168.67  | 2224002   | 54080.46  | 58325.28  | 66831.35  | 32942.34  | 64523.13  | 49534.08  |

|           |           |           |           |           |           |           |           |           |           |
|-----------|-----------|-----------|-----------|-----------|-----------|-----------|-----------|-----------|-----------|
| LN483.007 | LN483.007 | LN483.007 | LN483.007 | LN483.007 | LN483.008 | LN483.008 | LN483.007 | LN483.007 | LN483.008 |
| 39080.39  | 29448.61  | 23686.46  | 22997.43  | 24589.39  | 21301.75  | 34942.88  | 38215.38  | 39275.81  | 36370.59  |
| 37707.6   | 28730.08  | 21545.34  | 27909.29  | 22640.02  | 21070.94  | 33332.15  | 36179.38  | 44182.67  | 42362.8   |
| 40750.76  | 29860.71  | 20072.05  | 28384.74  | 22761.24  | 19866.31  | 34041.16  | 30434.29  | 40180.95  | 40995.54  |
| 38692     | 26269.57  | 22561.3   | 28081.78  | 25644.87  | 19988.34  | 34070.65  | 33289.19  | 39988.22  | 36745.4   |
| 38159.44  | 29055.1   | 21354.47  | 29116.91  | 25130.85  | 19858.95  | 32217.84  | 32923.55  | 38233.84  | 37557.01  |

|           |           |           |           |           |           |           |           |           |           |
|-----------|-----------|-----------|-----------|-----------|-----------|-----------|-----------|-----------|-----------|
| LN483.008 |
| 20764.12  | 24175.38  | 30589.89  | 35100.41  | 38273.58  | 40771.1   | 62207.59  | 53198.8   | 45081.87  | 46744.58  |
| 21013.27  | 20126.13  | 29496.52  | 33523.18  | 39691.89  | 42997.61  | 60934.16  | 50873.02  | 47135.53  | 50253.7   |
| 22394.55  | 20813.26  | 28578.94  | 34876.05  | 39904.21  | 42240.65  | 65638.71  | 54295.34  | 47121.35  | 46371.32  |
| 23997.04  | 19752.9   | 30358.1   | 34560.8   | 38307.6   | 39537.07  | 63015.29  | 52985.9   | 45103.1   | 46280.44  |
| 22910.73  | 20371.34  | 29812.91  | 31412.23  | 37277.85  | 42631     | 60121.71  | 55592.7   | 42664.79  | 45622.98  |

|           |           |           |           |           |           |           |           |           |           |
|-----------|-----------|-----------|-----------|-----------|-----------|-----------|-----------|-----------|-----------|
| LN483.008 | LN483.008 | LN483.008 | LN483.008 | LN483.008 | LN483.008 | LN483.007 | LN483.008 | LN483.008 | LN483.008 |
| 23349.69  | 28276.57  | 42862.11  | 15968.84  | 60499.42  | 33501.55  | 61371.45  | 26347.86  | 22423.9   | 32255.75  |
| 24766.78  | 24551.87  | 42870.97  | 12773.55  | 54108.24  | 32765.66  | 68111.56  | 29567.07  | 22454.29  | 32388.96  |
| 26768.38  | 24901.88  | 42348.63  | 14074.95  | 62361.37  | 34411.78  | 60375.55  | 32546.97  | 22725.02  | 32355.07  |
| 24413.05  | 27091.46  | 42285.4   | 13858.73  | 59361.19  | 31380.84  | 56312.79  | 29237.51  | 20042.28  | 34102.62  |
| 24605.01  | 23899.01  | 39966.76  | 13756.64  | 64826.6   | 30301.61  | 64004.37  | 30389.03  | 23494.15  | 31047.13  |

|           |           |           |           |           |           |           |           |           |           |
|-----------|-----------|-----------|-----------|-----------|-----------|-----------|-----------|-----------|-----------|
| LN483.008 |
| 35155.3   | 24032.25  | 51308.1   | 39659.61  | 26238.68  | 21893.09  | 30017.78  | 48770.4   | 15138.38  | 47037.68  |
| 39505.36  | 25415.99  | 55740.93  | 39579.45  | 24908.17  | 22495.95  | 32255.68  | 44542.61  | 18766.7   | 42881.17  |
| 32725.54  | 25441.38  | 53923.09  | 39889.42  | 25301.6   | 22585.86  | 31091.23  | 43757.65  | 15745.17  | 45478.84  |
| 34459.47  | 26193.79  | 57488.13  | 40435.38  | 27425.36  | 20363     | 30335.83  | 46240.73  | 15644.79  | 50593.24  |
| 34486.26  | 26256.22  | 63468.39  | 39366.84  | 26622.77  | 22856.37  | 31614.98  | 45661.81  | 14458.88  | 48475.81  |

|           |           |           |           |           |           |           |           |           |           |
|-----------|-----------|-----------|-----------|-----------|-----------|-----------|-----------|-----------|-----------|
| LN483.008 |
| 23590.24  | 34694.54  | 38528.97  | 56842.84  | 33931.06  | 44638.34  | 82295.03  | 31804.32  | 40304.37  | 42448.53  |
| 20678.89  | 34819.42  | 34111.36  | 55866.39  | 34185.28  | 44893.59  | 84236.44  | 35618.02  | 40680.78  | 39166.14  |
| 20195.5   | 30474.36  | 39740.41  | 52941.83  | 32364.97  | 46531.11  | 84552.28  | 37070.24  | 40452.41  | 40298.24  |
| 18658.01  | 32563.71  | 38161.01  | 58662.74  | 31431.63  | 48165.69  | 79168.87  | 33081.57  | 41111.04  | 41487.31  |
| 20085.24  | 32318.32  | 38589.38  | 58018.08  | 34574.67  | 48444.04  | 80539.9   | 36522.14  | 40734.27  | 42494.73  |

|           |           |           |           |           |           |           |           |           |           |           |
|-----------|-----------|-----------|-----------|-----------|-----------|-----------|-----------|-----------|-----------|-----------|
| LN483.008 | LN483.009 | LN483.008 | LN483.008 |
| 34467.61  | 25423.35  | 29682.92  | 25311.86  | 44165.47  | 34344.8   | 21389.01  | 20829.33  | 55031.59  | 32415.96  |           |
| 35826.57  | 26632.21  | 28362.59  | 26843.33  | 47071.2   | 33693.02  | 23533.1   | 20128.22  | 53031.25  | 37756.62  |           |
| 41669.55  | 26333.08  | 33518.13  | 24928.98  | 40408.26  | 33499.37  | 23775.83  | 19795.19  | 52514.25  | 35889.49  |           |
| 35506.68  | 26608.66  | 31366.2   | 24207.73  | 42222.93  | 33917.53  | 22263.32  | 21798.79  | 54622.66  | 39512.61  |           |
| 34850.16  | 24121.67  | 31434.84  | 28871.04  | 47228.81  | 33496.86  | 21262.23  | 20011.6   | 50329.92  | 37407.96  |           |

|           |           |           |           |           |           |           |           |           |           |
|-----------|-----------|-----------|-----------|-----------|-----------|-----------|-----------|-----------|-----------|
| LN483.009 | LN483.008 | LN483.008 | LN483.007 | LN483.008 | LN483.008 | LN483.008 | LN483.008 | LN483.008 | LN483.008 |
| 27450.95  | 31221.58  | 33237.25  | 44463.09  | 55244.61  | 46291.77  | 23057.26  | 35536.25  | 27427.39  | 45604.29  |
| 26781.72  | 35578.46  | 30479.68  | 47502.13  | 58712.83  | 45999.55  | 23057.98  | 31137.03  | 28891.58  | 43281.37  |
| 28164.29  | 34651.02  | 31695.72  | 45772.99  | 61246.19  | 48461.12  | 22883.64  | 37830.7   | 30822.94  | 41288.98  |
| 27142.12  | 36469.26  | 32482.17  | 50255.08  | 59235.5   | 43386.29  | 22617.1   | 33140.9   | 27229.32  | 44687.45  |
| 26845.01  | 35169.2   | 29531.2   | 41599.85  | 52746.42  | 43615.14  | 23216.7   | 28074.02  | 27133.44  | 36611.02  |



|           |           |           |           |           |           |           |           |           |           |
|-----------|-----------|-----------|-----------|-----------|-----------|-----------|-----------|-----------|-----------|
| LN483.008 | LN483.008 | LN483.007 | LN483.007 | LN483.007 | LN483.008 | LN483.007 | LN483.008 | LN483.008 | LN483.008 |
| 45653.45  | 64552.13  | 46769.98  | 63058.68  | 56181.12  | 72617.85  | 62056.47  | 17194.7   | 32452.15  | 27820.99  |
| 43137.32  | 57960.37  | 48282.17  | 65062.43  | 58980.5   | 66436.79  | 53095.32  | 17309.76  | 35581.23  | 24710.32  |
| 45927.26  | 62615.98  | 47995.4   | 66272.49  | 54780.82  | 64404.28  | 60186.79  | 16531.53  | 35226.94  | 24390.7   |
| 43208.23  | 59922.76  | 42416.77  | 62906.38  | 58035.91  | 66434.74  | 58789.41  | 16265.51  | 33987.66  | 26054.17  |
| 48004.44  | 57115.75  | 41969.56  | 64926.33  | 54252     | 69376.84  | 62171.98  | 14995.64  | 35062.15  | 24114.62  |

|           |           |           |           |           |           |           |           |           |           |
|-----------|-----------|-----------|-----------|-----------|-----------|-----------|-----------|-----------|-----------|
| LN483.008 | LN483.009 | LN483.008 | LN483.008 | LN483.008 | LN483.008 | LN483.008 | LN483.008 | LN484.788 | LN485.003 |
| 52913.49  | 19347.91  | 29687.97  | 33505.25  | 23327.35  | 49003.76  | 50771.29  | 29265.15  | 752828.9  | 33955.84  |
| 58740.78  | 19256.12  | 34011.99  | 32696.55  | 23830.91  | 47845.45  | 48927.02  | 37999.78  | 629103.7  | 35264.1   |
| 47646.58  | 18884     | 32470.78  | 35650.77  | 21910.07  | 47476.2   | 51198.81  | 31080.24  | 695456.1  | 33366.52  |
| 50096.96  | 19828.18  | 30909.57  | 32311.51  | 22984.54  | 47779.86  | 50906.8   | 35073.27  | 807307.4  | 37446.27  |
| 48637.83  | 19015.97  | 29908.78  | 34278.01  | 21766.68  | 44861.82  | 49376.79  | 30399.53  | 1011569   | 36221.37  |

|           |           |           |           |           |           |           |           |           |           |
|-----------|-----------|-----------|-----------|-----------|-----------|-----------|-----------|-----------|-----------|
| LN485.004 | LN485.004 | LN485.004 | LN485.004 | LN485.005 | LN485.004 | LN485.004 | LN485.004 | LN485.005 | LN485.004 |
| 61998.61  | 44465.24  | 34756.56  | 48441.06  | 17384     | 22600.67  | 35592.43  | 22826.5   | 28163.28  | 15246.32  |
| 63792.82  | 40333.29  | 33034.63  | 46595.37  | 20493.1   | 28708.38  | 36908.73  | 24068.51  | 29171.45  | 11005.68  |
| 64644.91  | 35041.89  | 32981.02  | 50003.31  | 18947.45  | 26175.76  | 39372.17  | 25809.68  | 28334.84  | 11424.96  |
| 61408.12  | 40216.51  | 28758.41  | 47660.96  | 21205.54  | 24900.64  | 38301.15  | 22676.96  | 28903.27  | 10126.63  |
| 64645.45  | 37440.91  | 30041.55  | 48216.82  | 20139.24  | 27122.72  | 36639.41  | 24069.65  | 31372.96  | 12722.75  |

|           |           |           |           |           |           |           |           |           |           |
|-----------|-----------|-----------|-----------|-----------|-----------|-----------|-----------|-----------|-----------|
| LN485.005 | LN485.004 | LN485.004 | LN485.004 | LN485.004 | LN485.004 | LN485.005 | LN485.005 | LN485.004 | LN485.004 |
| 19332.63  | 30206.04  | 31886.07  | 56241.34  | 80605.17  | 34859.33  | 35350.14  | 18676.92  | 41630.64  | 57107.42  |
| 20647.13  | 30599.63  | 35757.1   | 53912.26  | 87573.19  | 34200.09  | 39634.15  | 18884.77  | 37767.84  | 56572.99  |
| 19431.64  | 28632.44  | 36277.79  | 55664.35  | 74299.47  | 37227.57  | 36146.76  | 18023.83  | 39481.93  | 47760.1   |
| 21624.76  | 31880.89  | 35052.83  | 51694.47  | 76831.88  | 37965.05  | 35658.73  | 19539.36  | 37776.58  | 61056.14  |
| 20625.89  | 24692.27  | 33163.74  | 58223.91  | 84481.09  | 36591.98  | 30134.38  | 19839.37  | 36922.3   | 59805.19  |

|           |           |           |           |           |           |           |           |           |           |
|-----------|-----------|-----------|-----------|-----------|-----------|-----------|-----------|-----------|-----------|
| LN485.004 | LN485.004 | LN485.004 | LN485.004 | LN485.004 | LN485.005 | LN485.004 | LN485.004 | LN485.004 | LN485.004 |
| 36300.96  | 71045.33  | 42110.07  | 44300.94  | 38976.88  | 28424.81  | 39770.77  | 39455.27  | 33415.5   | 47089.68  |
| 34028.9   | 67857.86  | 44284.33  | 40694.01  | 38146.21  | 30679.26  | 37594.64  | 38735.12  | 30457.79  | 49256.19  |
| 32372.02  | 71713.99  | 42585.33  | 39090.72  | 44435.1   | 32481.26  | 36718.68  | 39767.28  | 34690.06  | 45987.39  |
| 33237.58  | 71823.43  | 36312.71  | 37064.73  | 39173.49  | 33415.42  | 36938.95  | 38494.07  | 29614.29  | 38934.67  |
| 36956.38  | 65587.76  | 43186.95  | 42525.64  | 39680.67  | 30205.49  | 35803.82  | 37877.24  | 32894.28  | 45516.04  |

|           |           |           |           |           |           |           |           |           |           |
|-----------|-----------|-----------|-----------|-----------|-----------|-----------|-----------|-----------|-----------|
| LN485.004 | LN485.005 | LN485.004 | LN485.005 |
| 39477.46  | 39042.17  | 58138.43  | 35691.16  | 63613.04  | 56795.94  | 32757.89  | 17674.19  | 37275.76  | 30705.11  |
| 35348.4   | 41611.7   | 60523.41  | 39229.26  | 55736.5   | 56880.42  | 28507.11  | 17747.55  | 35464.69  | 31862.31  |
| 34048.3   | 46752.43  | 58449.92  | 34706.8   | 54439.37  | 56158.05  | 26968.53  | 17730.98  | 37797.02  | 32372.66  |
| 40545.34  | 40247.3   | 60961.74  | 34403.91  | 64063.91  | 57008.98  | 31145.62  | 18351.81  | 34365.8   | 28815.6   |
| 40304.01  | 38777.84  | 56278.92  | 33518.14  | 62395.68  | 57064.19  | 33492.77  | 15876.75  | 36456.19  | 29680.75  |

|           |           |           |           |           |           |           |           |           |           |
|-----------|-----------|-----------|-----------|-----------|-----------|-----------|-----------|-----------|-----------|
| LN485.005 | LN485.005 | LN485.004 | LN485.004 | LN485.004 | LN485.004 | LN485.004 | LN485.005 | LN485.005 | LN485.004 |
| 23818.17  | 38974.9   | 52693.89  | 44136.29  | 64564.89  | 40571.74  | 44217.69  | 25865.05  | 19768.77  | 27669.56  |
| 24209.51  | 39716.89  | 52295.74  | 49833.58  | 66716.38  | 41015.54  | 41790.1   | 29711.56  | 19635.43  | 25951.89  |
| 22404.15  | 40180.96  | 52135.28  | 49393.46  | 66851.21  | 42548.9   | 40763.89  | 27589.67  | 17711.01  | 30123.06  |
| 24188.4   | 37141.9   | 54078.67  | 50606.4   | 67399.4   | 32470.38  | 46901.7   | 27134     | 19749.46  | 28651.17  |
| 21444.95  | 38062.26  | 52540.02  | 50045.4   | 68005.92  | 38701.45  | 42860.22  | 28463.58  | 18241.23  | 29283.55  |

|           |           |           |           |           |           |           |           |           |           |
|-----------|-----------|-----------|-----------|-----------|-----------|-----------|-----------|-----------|-----------|
| LN485.004 | LN485.004 | LN485.004 | LN485.005 | LN485.004 | LN485.004 | LN485.004 | LN485.005 | LN485.004 | LN485.005 |
| 29604.56  | 49030.76  | 53721.46  | 24021.51  | 30160.28  | 33614.3   | 51796.58  | 16436.77  | 54308.39  | 28930.66  |
| 31646.1   | 46508.7   | 55952.05  | 26790.73  | 29547.24  | 37794.11  | 49236.3   | 17332.91  | 57226.69  | 29286.44  |
| 29942.85  | 45909.6   | 56983.38  | 23357.06  | 30167.92  | 37887.69  | 58830.06  | 16727.42  | 59052.01  | 33281.06  |
| 33051.97  | 39960.53  | 52905.77  | 25011.58  | 28378.89  | 37002.81  | 52291.84  | 16503.86  | 53511.82  | 32081.73  |
| 25205.16  | 39970.04  | 52441.76  | 24500.43  | 29558.64  | 33262.45  | 52079.65  | 16991.63  | 51112.11  | 34443.83  |



|           |           |           |           |           |           |           |           |           |           |
|-----------|-----------|-----------|-----------|-----------|-----------|-----------|-----------|-----------|-----------|
| LN485.004 | LN485.005 | LN485.004 |
| 64769.02  | 16948.14  | 49310.42  | 52332.99  | 35983.62  | 41219.16  | 26468.42  | 71594.14  | 48149.9   | 51897.09  |
| 58895.48  | 15564.01  | 45576.89  | 50022.44  | 34402.9   | 41080.82  | 27547.41  | 73643.93  | 48884.45  | 48585.28  |
| 63636.8   | 16478.99  | 48148.75  | 51243.19  | 37236.01  | 41159.92  | 24500.88  | 63369.74  | 48433.15  | 54379.59  |
| 61607.1   | 16903.53  | 48321.04  | 49704.28  | 33758.47  | 43673.47  | 27889.1   | 68621.66  | 47565.04  | 51010.66  |
| 61029.02  | 16344.57  | 48034.81  | 46747.58  | 37205.18  | 40149.8   | 26351.6   | 67777.05  | 50519.01  | 50703.98  |

|           |           |           |           |           |           |           |           |           |           |
|-----------|-----------|-----------|-----------|-----------|-----------|-----------|-----------|-----------|-----------|
| LN485.004 |
| 58322.33  | 48172.41  | 30797.67  | 63889.13  | 63943.53  | 52069.07  | 37154.46  | 28752.56  | 34071.63  | 60403.32  |
| 62259.2   | 43611.74  | 30068.93  | 60078.11  | 68445.56  | 52141.41  | 35700.97  | 30667.78  | 31985.78  | 61848.09  |
| 67330.37  | 45612.63  | 31521.88  | 64405.13  | 68739.17  | 57222.64  | 33646.85  | 27777.29  | 34750.19  | 65548.05  |
| 62534.05  | 48299.63  | 29483.54  | 59264.47  | 66708.04  | 48540.4   | 33406.03  | 24899.06  | 29928     | 69342.12  |
| 66316.01  | 44606.3   | 26798.29  | 60796.03  | 66308.11  | 51266.21  | 35036.82  | 28071.66  | 31167.52  | 61743.24  |

|           |           |           |           |           |           |           |           |           |           |
|-----------|-----------|-----------|-----------|-----------|-----------|-----------|-----------|-----------|-----------|
| LN485.004 | LN485.004 | LN485.005 | LN485.283 | LN485.283 | LN486.786 | LN487.002 | LN487.001 | LN487.002 | LN487.002 |
| 54077.97  | 83037.11  | 25286.92  | 51905.63  | 30434.58  | 265301.2  | 14427.47  | 130576.8  | 74884.27  | 29937.42  |
| 52714.97  | 87361.75  | 27081.19  | 42547.19  | 26940.3   | 254090.5  | 9768.98   | 136942.3  | 83220.32  | 34388.22  |
| 47042.76  | 70546.49  | 27096.11  | 48142.17  | 33823.73  | 278965.1  | 13685.89  | 126612.5  | 83571.16  | 29850.58  |
| 43727.03  | 78871.02  | 25077.18  | 37346.89  | 19773.97  | 321003    | 13439.38  | 126955.5  | 73767.15  | 30584.9   |
| 43320.58  | 71807.83  | 27959.44  | 55012.35  | 24267.58  | 398622.3  | 13291.46  | 123945.2  | 78878.43  | 26926.24  |

| LN487.002 | LN487.002 | LN487.001 | LN487.002 | LN487.001 | LN487.002 | LN487.002 | LN487.001 | LN487.002 | LN487.001 |
|-----------|-----------|-----------|-----------|-----------|-----------|-----------|-----------|-----------|-----------|
| 39324.31  | 35192.04  | 107406    | 17661.94  | 80617.42  | 52618.24  | 38807.56  | 104686.9  | 47799.21  | 41920.63  |
| 44016.23  | 33569.47  | 109313.1  | 19177.72  | 75899.48  | 47152.43  | 36192.29  | 103139.6  | 51066.92  | 35359.12  |
| 45624.97  | 30394.05  | 105939.4  | 15875.47  | 85607.14  | 46906.95  | 35745.27  | 109369.7  | 45800     | 33139.45  |
| 44386.63  | 32709.49  | 105726.1  | 15677.18  | 72849.29  | 49207.93  | 34745.82  | 117599.5  | 50615.84  | 38667.51  |
| 43273.91  | 32423.43  | 109164.7  | 16637     | 79391.1   | 43728.5   | 35614.06  | 102355    | 51412.96  | 33307.95  |

|           |           |           |           |           |           |           |           |           |           |
|-----------|-----------|-----------|-----------|-----------|-----------|-----------|-----------|-----------|-----------|
| LN487.002 | LN487.002 | LN487.001 | LN487.002 | LN487.002 | LN487.002 | LN487.002 | LN487.002 | LN487.002 | LN487.019 |
| 90665.56  | 38976.8   | 47589.61  | 31630.54  | 28400.83  | 50918.64  | 48202.55  | 42795.13  | 82616.63  | 81797.1   |
| 95039.91  | 36362.67  | 45469.05  | 34420.7   | 29686.19  | 46476.63  | 47620.54  | 42587.07  | 81392.81  | 70133.32  |
| 87546.33  | 40348.21  | 51438.54  | 29660.69  | 28021.37  | 41992.25  | 44930.86  | 41704.29  | 74406.55  | 73029.83  |
| 92342.58  | 39286.01  | 42360.62  | 33060.39  | 26589.11  | 47428.86  | 47253.49  | 43485.9   | 82592.31  | 67476.45  |
| 88391.61  | 30443.72  | 49166.92  | 27593.16  | 27618.25  | 45009.92  | 44247.31  | 44506.52  | 63109.51  | 64013.32  |

|           |           |           |           |           |           |           |           |           |           |
|-----------|-----------|-----------|-----------|-----------|-----------|-----------|-----------|-----------|-----------|
| LN487.020 | LN487.02_ | LN487.02_ | LN487.020 | LN487.02_ | LN487.02_ | LN487.020 | LN487.020 | LN487.020 | LN487.020 |
| 79470.04  | 45930.08  | 18675.74  | 85637.73  | 67639.34  | 67424.56  | 28961.42  | 96602.6   | 108281.2  | 52097.08  |
| 41146.3   | 59657.69  | 11053.85  | 70095.49  | 68891.33  | 67260.71  | 33803.19  | 55430.3   | 83695.72  | 39182.16  |
| 37551.61  | 56045.55  | 14960.8   | 73303.38  | 62566.65  | 77020.03  | 21342.01  | 64700.66  | 73604.08  | 54593.61  |
| 48007.55  | 82770.76  | 14534.67  | 65160.26  | 88259.93  | 81279.3   | 22773.21  | 83752.38  | 72182     | 52399.77  |
| 41478.97  | 37378.4   | 13172.47  | 51493.71  | 74991.84  | 62946.94  | 26228.48  | 57392.32  | 87164.79  | 47717.36  |

|           |           |           |           |           |           |           |           |           |           |
|-----------|-----------|-----------|-----------|-----------|-----------|-----------|-----------|-----------|-----------|
| LN487.019 | LN487.020 | LN487.02_ | LN487.020 | LN487.019 | LN487.020 | LN487.020 | LN487.02_ | LN487.019 | LN487.020 |
| 51329.4   | 69221.04  | 111136.5  | 69329.03  | 83303.55  | 38540.51  | 67697.17  | 102593.9  | 58124.29  | 42627.29  |
| 71948.81  | 76361.68  | 78313.44  | 48386.36  | 100381.5  | 39677.35  | 56952.58  | 76996.88  | 58498.09  | 50734.22  |
| 42359.62  | 87995.91  | 75229.2   | 57468.75  | 80654.98  | 47570.64  | 84991.26  | 96299.36  | 51162.1   | 54025.16  |
| 43765.49  | 83643.63  | 77249.07  | 48971.7   | 116764.3  | 56147.65  | 65204.49  | 91587.19  | 60382.27  | 48368.73  |
| 52942.17  | 91115.94  | 55744.16  | 40731.59  | 103959.5  | 30106.54  | 68307.55  | 79076.01  | 59458.39  | 36999.63  |

|           |           |           |           |           |           |           |           |           |           |
|-----------|-----------|-----------|-----------|-----------|-----------|-----------|-----------|-----------|-----------|
| LN487.020 | LN487.019 | LN487.02_ | LN487.020 | LN487.019 | LN487.020 | LN487.020 | LN487.020 | LN487.020 | LN487.020 |
| 24006.17  | 107882.3  | 82460.74  | 60313.02  | 70758.2   | 53289.77  | 56117.41  | 72272.8   | 25803.01  | 38105.08  |
| 47042.22  | 86514.47  | 83707.02  | 54349.24  | 70741.86  | 51543.34  | 42102.06  | 182451.6  | 19129.05  | 50887.08  |
| 35977.6   | 140835.2  | 72144.37  | 95854.71  | 84101.22  | 42345.82  | 55286.88  | 81654.4   | 21833.21  | 46887.07  |
| 37732.93  | 109023.2  | 74625.14  | 76688.39  | 96643.19  | 54334.34  | 63390.78  | 87031     | 21522.28  | 43699.07  |
| 32858.75  | 112071.1  | 89120.53  | 74515.85  | 75000.96  | 43076.4   | 49829.47  | 130942    | 22688.3   | 37856.09  |



|           |           |           |           |           |           |           |           |           |           |
|-----------|-----------|-----------|-----------|-----------|-----------|-----------|-----------|-----------|-----------|
| LN487.02_ | LN487.020 | LN487.019 | LN487.020 | LN487.02_ | LN487.02_ | LN487.02_ | LN487.020 | LN487.019 | LN487.019 |
| 60795.44  | 27931.18  | 62530.79  | 50425.35  | 56297.77  | 78506.53  | 81754.65  | 71652.56  | 104396.9  | 121783.1  |
| 97729.05  | 25776.21  | 65375.73  | 61478.73  | 85207.53  | 87852.12  | 88714.04  | 109139.2  | 76427.59  | 70591.76  |
| 60529.66  | 25627.42  | 82590.8   | 51376.01  | 49664.93  | 83093.3   | 104530.4  | 53061.64  | 81015.83  | 121589.7  |
| 50961.44  | 17621.82  | 98896.2   | 65567     | 43607.87  | 85909.3   | 79789.8   | 67383.7   | 61891.42  | 58257.55  |
| 66225.32  | 23280.33  | 76062.05  | 60547.96  | 46588.09  | 92045.75  | 113247.2  | 74781.76  | 74396.84  | 65578.33  |

|           |           |           |           |           |           |           |           |           |           |
|-----------|-----------|-----------|-----------|-----------|-----------|-----------|-----------|-----------|-----------|
| LN487.020 | LN487.02_ | LN487.020 |
| 19690.22  | 59150.78  | 21481.6   | 41333.38  | 39666.28  | 97291.29  | 44191.24  | 33599.84  | 35964.33  | 57311.75  |
| 25905.73  | 65820.49  | 23595.46  | 41067.31  | 56806.44  | 79304.51  | 53468.55  | 43745.76  | 60083.46  | 62248.28  |
| 23402.55  | 62833.78  | 24564.26  | 39894.03  | 45386.53  | 87378.25  | 60265.04  | 30394.09  | 69965.41  | 39880.55  |
| 23201.42  | 85163.36  | 20243.39  | 46668.84  | 44590.63  | 87197.64  | 61137.32  | 31572.4   | 30462.87  | 37734.03  |
| 20150.91  | 79675.85  | 19056.06  | 43725.07  | 51010.19  | 77511.07  | 45913.07  | 36132.68  | 51785.06  | 40962.51  |

|           |           |           |           |           |           |           |           |           |           |
|-----------|-----------|-----------|-----------|-----------|-----------|-----------|-----------|-----------|-----------|
| LN487.020 | LN487.020 | LN487.020 | LN487.020 | LN487.02_ | LN487.02_ | LN487.020 | LN487.020 | LN487.019 | LN487.020 |
| 54036.22  | 40334.4   | 26292.06  | 46488.87  | 109220.1  | 60698.47  | 61835.7   | 31628.84  | 102226.3  | 35192.33  |
| 57702.68  | 49095.3   | 18640.41  | 44322.82  | 94027.36  | 93358.98  | 49475.49  | 27053.25  | 94107.21  | 55714.16  |
| 44052.77  | 41284.51  | 33417.66  | 42531.58  | 77574.78  | 71626.6   | 52002.96  | 19096.78  | 87256.11  | 35271.3   |
| 38948.83  | 36580.71  | 25763.5   | 47812.72  | 93880.84  | 63562.77  | 58855.35  | 24685.24  | 116613.6  | 40676.02  |
| 51575.1   | 40193.19  | 27803.63  | 41429.17  | 70346.36  | 101253.3  | 50466.57  | 19737.1   | 100124.4  | 81654.65  |

|           |           |           |           |           |           |           |           |           |           |
|-----------|-----------|-----------|-----------|-----------|-----------|-----------|-----------|-----------|-----------|
| LN487.02_ | LN487.020 | LN487.020 | LN487.020 | LN487.020 | LN487.020 | LN487.019 | LN487.020 | LN487.019 | LN487.020 |
| 81230.27  | 39711.85  | 71431.79  | 33581.01  | 24568.38  | 41472.55  | 97245.35  | 25154.82  | 99534.93  | 67928.49  |
| 70894.93  | 65638.98  | 80217.07  | 25628.48  | 32192.7   | 73992.84  | 113782.5  | 34286.15  | 81180.14  | 59100.68  |
| 65742.39  | 57971.08  | 84069.35  | 30309.16  | 27344.08  | 46656.86  | 137833.1  | 26541.99  | 93206.73  | 56647.35  |
| 120207.1  | 55808.81  | 76152.3   | 26421.36  | 21940.8   | 41749.89  | 112314.7  | 27307.86  | 94403.96  | 59932.2   |
| 75883.15  | 76758.72  | 69769.22  | 35200.21  | 38992.21  | 51998.35  | 119843.6  | 27386.27  | 108230.9  | 66037.54  |

|           |           |           |           |           |           |           |           |           |           |
|-----------|-----------|-----------|-----------|-----------|-----------|-----------|-----------|-----------|-----------|
| LN487.020 | LN487.019 | LN487.020 | LN487.020 | LN487.020 | LN487.020 | LN487.020 | LN487.020 | LN487.153 | LN487.226 |
| 25425.73  | 75448.99  | 41315.92  | 31269.62  | 52070.86  | 33711.97  | 57584.02  | 37048.82  | 123587    | 154546.5  |
| 37037.03  | 98628.74  | 49629.96  | 47103.75  | 50657.26  | 48089.21  | 43020.49  | 43119     | 43199.76  | 158767.4  |
| 30373.08  | 98814.01  | 33940.88  | 40499.67  | 44818.8   | 53124.32  | 39335.83  | 65434.65  | 28027.9   | 170634.8  |
| 24350.68  | 115943.2  | 36947.51  | 33238.24  | 47882.44  | 38814.37  | 47141.12  | 41311.95  | 93107.76  | 121992    |
| 23007.36  | 135969.9  | 37023.64  | 38231.23  | 53587.65  | 42553.82  | 42180.92  | 42319.85  | 98462.16  | 141409    |

|           |           |           |           |           |           |           |           |           |           |           |
|-----------|-----------|-----------|-----------|-----------|-----------|-----------|-----------|-----------|-----------|-----------|
| LN488.229 | LN488.784 | LN489.195 | LN489.253 | LN489.278 |
| 28285.65  | 109933.2  | 25270.17  | 18102.95  | 17561.85  | 28507.43  | 27831.61  | 24070.98  | 61217.25  | 15163.99  |           |
| 29827.18  | 83790.39  | 25922.6   | 16854.32  | 18095.06  | 28669.68  | 27586.11  | 22586.31  | 73288.95  | 14447.92  |           |
| 27341.24  | 86919.81  | 27724.46  | 17668.23  | 17462.81  | 26567.58  | 24813.27  | 23496.47  | 108108.9  | 10661.15  |           |
| 26170.92  | 84465.74  | 26947.33  | 16464.49  | 15894.36  | 26473.29  | 32294.66  | 25754.05  | 135070    | 14299.63  |           |
| 20995.32  | 109420.6  | 26989.74  | 16898.59  | 17982.21  | 27868.28  | 25730.46  | 25998.65  | 142387.9  | 8396.899  |           |

|           |           |           |           |           |           |           |           |           |           |
|-----------|-----------|-----------|-----------|-----------|-----------|-----------|-----------|-----------|-----------|
| LN489.784 | LN490.763 | LN490.783 | LN490.995 | LN490.995 | LN490.995 | LN490.994 | LN490.994 | LN490.995 | LN490.995 |
| 46531.52  | 37352.15  | 43579.85  | 44071.24  | 18007     | 40712.43  | 60248.69  | 80701.15  | 59098.97  | 75544.9   |
| 46768.33  | 35035.81  | 43659.41  | 58104.54  | 21171.67  | 41707.73  | 69831.93  | 84666.33  | 61495.13  | 52148.83  |
| 48012.41  | 37694.65  | 45582.68  | 53378.03  | 19431.84  | 41334.99  | 69309.6   | 81391.83  | 67016.8   | 64632.45  |
| 46290.69  | 41367.65  | 43239.19  | 42164.49  | 16174.13  | 62229.88  | 36596.43  | 80431.57  | 68697.66  | 76746.87  |
| 43731.7   | 47802.17  | 50048.91  | 39357.06  | 16622.87  | 37290.26  | 72424.32  | 84418.03  | 70254.14  | 66583.95  |

|           |           |           |           |           |           |           |           |           |           |
|-----------|-----------|-----------|-----------|-----------|-----------|-----------|-----------|-----------|-----------|
| LN490.995 |
| 49737.65  | 57056.8   | 44204.67  | 45656.59  | 34987.44  | 23731.37  | 30468.32  | 51483.17  | 47887.9   | 44339.02  |
| 53915.17  | 70654.72  | 40262.65  | 49297.12  | 35407.81  | 27494.92  | 22864.16  | 50360.99  | 57187.04  | 45659.93  |
| 51562.43  | 69071.16  | 52142.59  | 33687.96  | 29914.72  | 27372.38  | 31248.97  | 62525.43  | 49790.05  | 35474.88  |
| 53340.82  | 50410.82  | 43783.97  | 45449.64  | 45277.72  | 18572.69  | 26084.42  | 66570.08  | 54210.88  | 44228.07  |
| 49887.34  | 57798.88  | 41498.96  | 46729.21  | 34712.84  | 27021.25  | 34659.96  | 73668.13  | 63459.61  | 47523.78  |



|           |           |           |           |           |           |           |           |           |           |
|-----------|-----------|-----------|-----------|-----------|-----------|-----------|-----------|-----------|-----------|
| LN490.994 | LN490.995 | LN490.995 | LN490.994 | LN490.994 | LN490.995 | LN490.995 | LN490.995 | LN490.995 | LN490.995 |
| 77051.24  | 70271.09  | 37541.45  | 69091.59  | 90512.44  | 37251.49  | 89249.4   | 31471.73  | 59092.72  | 66504.82  |
| 74672.82  | 96964.79  | 46279.57  | 51643.6   | 128642    | 69329.43  | 64682.49  | 57760.51  | 49469.43  | 109963.4  |
| 112492.5  | 71017.19  | 29140.54  | 63270.83  | 109584.5  | 37190.74  | 84126.95  | 52391.19  | 82594.73  | 118074.4  |
| 81463.81  | 55735.73  | 36410.53  | 69289.98  | 85169.02  | 46125.08  | 88087.27  | 39742.52  | 59791.64  | 61797.09  |
| 88940.97  | 77752.59  | 31179.19  | 59916.59  | 74447.8   | 55185.34  | 70622.2   | 39644.33  | 62498.02  | 65416.97  |

|           |           |           |           |           |           |           |           |           |           |
|-----------|-----------|-----------|-----------|-----------|-----------|-----------|-----------|-----------|-----------|
| LN490.995 | LN490.995 | LN490.995 | LN490.994 | LN490.995 | LN490.995 | LN490.995 | LN490.995 | LN490.994 | LN490.995 |
| 38919.68  | 47783.72  | 61080.09  | 57101.04  | 36157.99  | 66545.24  | 22611.01  | 70896.83  | 105753    | 63659.48  |
| 46104.66  | 69475.72  | 74108.09  | 58102.53  | 36039.51  | 89456.77  | 21312.83  | 101816.4  | 95076.14  | 52406.86  |
| 38060.69  | 49225.94  | 60315.36  | 63219.99  | 32372.53  | 51595.81  | 22337.71  | 67588.57  | 105571.9  | 53272.83  |
| 33319.68  | 63337.99  | 75307.61  | 53610.66  | 38030.38  | 94232.63  | 23818.67  | 105242.4  | 82478.5   | 57067.98  |
| 34527.51  | 63764.23  | 55957.17  | 68461.3   | 41683.27  | 69164.55  | 32894.55  | 128864.3  | 151079.4  | 70778.99  |

|           |           |           |           |           |           |           |           |           |           |
|-----------|-----------|-----------|-----------|-----------|-----------|-----------|-----------|-----------|-----------|
| LN490.995 |
| 50139.5   | 35071.14  | 36584.13  | 53403.68  | 88098.19  | 24723.4   | 40220.36  | 27120.77  | 23944.75  | 33958.06  |
| 61904.1   | 33789.62  | 40950.92  | 71908.45  | 104328.8  | 21530.82  | 49170.52  | 33812.02  | 21328.84  | 47340.18  |
| 40720.43  | 33759.16  | 61954.14  | 54440.84  | 96297.72  | 19506.24  | 56721.86  | 24214.54  | 23159.03  | 35850.18  |
| 58467.93  | 33440.88  | 48945.37  | 64594.77  | 64987.66  | 25119.22  | 32467.99  | 37514.68  | 19722.43  | 36501.87  |
| 52360.49  | 33840.42  | 47680.46  | 51749.94  | 82944.28  | 23270.54  | 45294.35  | 24101.6   | 23831.58  | 47054.88  |

|           |           |           |           |           |           |           |           |           |           |
|-----------|-----------|-----------|-----------|-----------|-----------|-----------|-----------|-----------|-----------|
| LN490.995 |
| 47131.82  | 58297.05  | 57869.88  | 82659.8   | 37082.36  | 52938.72  | 16950.22  | 25613.34  | 71596.75  | 39511.09  |
| 53002.09  | 68969.21  | 65348.54  | 75166.7   | 37612.64  | 54089.31  | 23649.65  | 23992.06  | 74550.58  | 33033.37  |
| 42876.91  | 66852.79  | 65771.04  | 74106.3   | 48933.66  | 40197.06  | 18407.48  | 19875.11  | 109216.1  | 36837.99  |
| 68253.78  | 57829.56  | 78169.3   | 76869.88  | 47922.92  | 79243.29  | 14768.86  | 20552.31  | 79981.61  | 32848.84  |
| 44593.35  | 60046.58  | 52579.42  | 70190.69  | 52801.89  | 38011.34  | 21096.89  | 20551.78  | 65625.34  | 45294.95  |

|           |           |           |           |           |           |           |           |           |           |
|-----------|-----------|-----------|-----------|-----------|-----------|-----------|-----------|-----------|-----------|
| LN490.995 | LN490.994 | LN490.995 |
| 56439.15  | 82022.99  | 53141.52  | 40819.18  | 34029.04  | 40806.55  | 74612.52  | 40127.09  | 23726.87  | 42919.29  |
| 56131.34  | 81769.16  | 51812.22  | 42667.02  | 39864.12  | 49061.17  | 71550.6   | 51328     | 30610.52  | 42960.31  |
| 75122.28  | 69537.44  | 66989.82  | 51489.37  | 46631.07  | 50537.67  | 68975.87  | 51043.98  | 19151.69  | 51994.87  |
| 51707.56  | 84571.61  | 53589.67  | 42399.45  | 33263.58  | 39167.26  | 64841.24  | 53896.49  | 25677.29  | 32525.82  |
| 63342.34  | 89311.68  | 40185.15  | 35792.84  | 47194.73  | 37228.99  | 61114.98  | 42286.72  | 20359.92  | 44844.79  |

|           |           |           |           |           |           |           |           |           |           |
|-----------|-----------|-----------|-----------|-----------|-----------|-----------|-----------|-----------|-----------|
| LN490.995 | LN490.994 | LN490.995 | LN490.994 | LN490.995 | LN490.994 | LN490.995 | LN490.995 | LN490.995 | LN490.994 |
| 40616.85  | 80410.92  | 40582.25  | 97085.39  | 49709.87  | 51152.95  | 38117.73  | 48795.45  | 36453.02  | 88752.11  |
| 35984.39  | 81327.23  | 38193.43  | 74692.27  | 54385.75  | 55047.36  | 38174.37  | 58794.16  | 29990.8   | 91505.59  |
| 38608.14  | 80190.03  | 47649.02  | 116115.7  | 64498.35  | 60938.55  | 44457.52  | 41675.85  | 35066.73  | 100807.3  |
| 47938.73  | 106257.8  | 33598.53  | 102804.6  | 46573.44  | 56253.41  | 49276.55  | 48380.26  | 31961.69  | 67190.49  |
| 40394.26  | 80475.25  | 56791.15  | 80281.03  | 53268.17  | 77143.97  | 43414.53  | 48415.19  | 45615.62  | 147500.5  |

|           |           |           |           |           |           |           |           |           |           |
|-----------|-----------|-----------|-----------|-----------|-----------|-----------|-----------|-----------|-----------|
| LN490.994 | LN490.995 | LN490.995 | LN491.032 | LN491.032 | LN491.211 | LN491.211 | LN491.212 | LN491.250 | LN491.249 |
| 92631.44  | 53607.64  | 25475.96  | 75662.47  | 71249.2   | 19316.32  | 34586.66  | 26219.8   | 31824.76  | 29891.56  |
| 122219.3  | 72701.1   | 27535.75  | 79594.72  | 66720.17  | 21510.64  | 33917.56  | 28806.36  | 30293.09  | 33326.21  |
| 89790.06  | 54553.76  | 24909.51  | 75503.25  | 78814.3   | 21076.49  | 30892.72  | 23800.43  | 33135.84  | 31362.16  |
| 95738.84  | 65676.78  | 24225.19  | 78286.18  | 75374.97  | 21676.87  | 35110.3   | 25357.56  | 37261.16  | 30774.22  |
| 78398.2   | 53343.07  | 25784.74  | 78882.31  | 69578.49  | 18581.3   | 29794.83  | 26581.33  | 37660.25  | 30492.09  |

|           |           |           |           |           |           |           |           |           |           |
|-----------|-----------|-----------|-----------|-----------|-----------|-----------|-----------|-----------|-----------|
| LN491.249 | LN491.359 | LN491.358 | LN491.359 | LN491.359 | LN491.36_ | LN491.359 | LN491.358 | LN491.359 | LN491.358 |
| 24519.2   | 193253.5  | 113007.7  | 117405.1  | 142444.8  | 163613.2  | 157701.7  | 178192.8  | 203103.1  | 305993.6  |
| 25608.06  | 214764    | 100566    | 164767.8  | 132221.7  | 202014.1  | 230837.2  | 159848.8  | 212433.5  | 202278.4  |
| 22346.04  | 233081.5  | 115339.2  | 170117.4  | 125107.5  | 167606.8  | 237804.1  | 160122.2  | 192542.5  | 176332.5  |
| 18395.17  | 241891.6  | 113225.3  | 168319.8  | 131438.8  | 163434.3  | 236102.6  | 162857.2  | 211606.8  | 188593.6  |
| 21948.82  | 216180.7  | 97799.6   | 185413.4  | 133691.7  | 160230.7  | 238260.4  | 156067.3  | 205572.5  | 186596    |



|           |           |           |           |           |           |           |           |           |           |
|-----------|-----------|-----------|-----------|-----------|-----------|-----------|-----------|-----------|-----------|
| LN491.359 | LN491.359 | LN491.359 | LN491.359 | LN491.359 | LN491.784 | LN492.361 | LN492.362 | LN492.362 | LN492.795 |
| 63924.63  | 79681.87  | 119402.8  | 118806.4  | 180709.7  | 24364.49  | 71163.6   | 50073.97  | 56727.99  | 14586.75  |
| 69982.34  | 83361.12  | 129799.7  | 128256.9  | 184363.7  | 22974.05  | 71559.62  | 51777.57  | 52057.32  | 13197.59  |
| 60980.47  | 82615.9   | 117692.2  | 123326.2  | 176174.6  | 27022.81  | 65647.23  | 47996.17  | 55411.31  | 12016.31  |
| 69579.75  | 91589.53  | 121162.9  | 126453.1  | 175777.9  | 17641.4   | 67630.62  | 52509.26  | 51381.64  | 14994.9   |
| 62038.74  | 83253.54  | 121791.1  | 120646.6  | 178998.3  | 22231.66  | 67592.66  | 52075.2   | 52764.86  | 13194.02  |

|           |           |           |           |           |           |           |           |           |           |
|-----------|-----------|-----------|-----------|-----------|-----------|-----------|-----------|-----------|-----------|
| LN492.821 | LN493.010 | LN493.189 | LN493.189 | LN493.189 | LN493.190 | LN493.189 | LN493.189 | LN493.189 | LN493.189 |
| 19030.41  | 36641.71  | 28401.8   | 37762.87  | 28119.2   | 25313.43  | 24801.43  | 26696.49  | 35472.89  | 37889.87  |
| 14170.75  | 40594.47  | 26451.34  | 35537.73  | 24026.52  | 25881.89  | 25896.41  | 24043.55  | 38234.41  | 40827.55  |
| 14233.33  | 39870.55  | 27374.03  | 34827.51  | 29056.9   | 26930.68  | 27734.53  | 24141.13  | 32883.24  | 41099.59  |
| 19619.85  | 43209.23  | 27227.24  | 33988.75  | 27753.68  | 27916.21  | 24871.04  | 23609.86  | 34398.55  | 42314.19  |
| 18199.08  | 39722.6   | 29540.57  | 33580.59  | 30069.16  | 26051.34  | 26265.35  | 23097.9   | 37017.96  | 38610.31  |

|           |           |           |           |           |           |           |           |           |           |           |
|-----------|-----------|-----------|-----------|-----------|-----------|-----------|-----------|-----------|-----------|-----------|
| LN493.189 | LN493.190 | LN493.228 | LN493.819 |
| 42756.13  | 35888.56  | 44812.41  | 46064.12  | 35497.2   | 41537.01  | 31442.91  | 33061.39  | 24859.01  | 16778.47  |           |
| 41923.64  | 36199.43  | 45849.86  | 46957.5   | 32349.69  | 35972.36  | 32912.57  | 31902.85  | 25961.71  | 14691.84  |           |
| 46177.2   | 34455.71  | 41053.66  | 47963.02  | 34879.35  | 38291.24  | 32048.51  | 37156.23  | 26997.41  | 17164.6   |           |
| 40757.5   | 35194.17  | 46784.76  | 43441.96  | 33659.54  | 39300.22  | 31923.3   | 36093.07  | 25131.74  | 13946.29  |           |
| 48316.85  | 33903.06  | 45840.7   | 43653.98  | 39976.86  | 41785.54  | 34549.25  | 34954.62  | 29893.85  | 14584.79  |           |

|           |           |           |           |           |           |           |           |           |           |
|-----------|-----------|-----------|-----------|-----------|-----------|-----------|-----------|-----------|-----------|
| LN494.79_ | LN494.910 | LN494.988 |
| 98395.55  | 38706.09  | 29137.38  | 39333.91  | 24046.71  | 35741.41  | 29690.86  | 45959.56  | 32014.22  | 41313.69  |
| 88220.35  | 38788.9   | 28383.02  | 36295.88  | 23714.21  | 35968.4   | 31470.95  | 46624.17  | 33819.23  | 42550.51  |
| 78244.74  | 38796.08  | 30747.54  | 35854.62  | 23077.64  | 35976.43  | 30322.48  | 45386.17  | 34059.71  | 41911.46  |
| 99239.27  | 36919.33  | 32198.07  | 37473.26  | 24300.37  | 36727.7   | 30277.11  | 45123.07  | 33042.37  | 44941.88  |
| 130058.1  | 35186.81  | 30870.64  | 38307.15  | 23693.35  | 31686.67  | 31828.4   | 44978.18  | 35508.2   | 45947.31  |

|           |           |           |           |           |           |           |           |           |           |
|-----------|-----------|-----------|-----------|-----------|-----------|-----------|-----------|-----------|-----------|
| LN494.988 |
| 51263.34  | 23518.39  | 44953.66  | 44770.22  | 43834.3   | 33632.12  | 38738.58  | 37386.93  | 43177.45  | 29230.42  |
| 52918.55  | 19063.88  | 45970.57  | 43501.76  | 43786.06  | 34198.89  | 39204.48  | 34761.71  | 43885.53  | 25835.85  |
| 54068.96  | 21073.82  | 40728.71  | 44838.7   | 43229.76  | 35283.41  | 39133.11  | 37743.42  | 46081.59  | 25702.25  |
| 49824.46  | 28125.69  | 43583.87  | 41665.55  | 45166.81  | 36191.26  | 41706.9   | 39696.45  | 45299.94  | 27366.89  |
| 45225.9   | 24816.04  | 43689.99  | 49355.53  | 46141.72  | 33687.86  | 41460.6   | 40489.82  | 44049.83  | 25347.88  |

|           |           |           |           |           |           |           |           |           |           |
|-----------|-----------|-----------|-----------|-----------|-----------|-----------|-----------|-----------|-----------|
| LN494.988 | LN494.988 | LN495.045 | LN495.244 |
| 61209.73  | 32474.82  | 54537.49  | 59930.7   | 46310.58  | 45148.38  | 42966.62  | 54692.75  | 52728.1   | 33388.19  |
| 75643.3   | 32313.14  | 51722.4   | 58974.89  | 50142.45  | 49537.02  | 43320.15  | 52764.55  | 57026.82  | 30035.13  |
| 59805.6   | 32767.61  | 52554.47  | 62207.25  | 51770.84  | 46441.48  | 44245.31  | 53809.36  | 58004.53  | 36677.09  |
| 68062.27  | 32012.27  | 57922.82  | 64496.68  | 47582.82  | 43233.43  | 42667.87  | 43511.86  | 57210.54  | 32442.25  |
| 63118.68  | 30332.38  | 54617.31  | 19322.62  | 17186.84  | 45193.95  | 19369.16  | 51842.3   | 24599.38  | 31062.69  |

|           |           |           |           |           |           |           |           |           |           |
|-----------|-----------|-----------|-----------|-----------|-----------|-----------|-----------|-----------|-----------|
| LN495.244 | LN495.244 | LN495.791 | LN496.79_ | LN497.181 | LN498.185 | LN498.783 | LN499.001 | LN499.002 | LN499.002 |
| 19514.34  | 30922.11  | 14669.16  | 24110.97  | 145463.2  | 24695.67  | 36684.56  | 37304.89  | 36133.32  | 22953.65  |
| 20298.98  | 28881.06  | 12217.78  | 17420.15  | 125751.8  | 26847.42  | 36764.36  | 39308.94  | 37677.24  | 24755.81  |
| 20042.72  | 30697.24  | 13647.28  | 17277.51  | 131542.8  | 21882.59  | 50249.62  | 25756.69  | 33386.38  | 23171.92  |
| 18876.87  | 32974.21  | 18854.17  | 25611.04  | 119492.4  | 18217.81  | 43163.98  | 38865.19  | 34618.27  | 23805.38  |
| 23335.79  | 27412.53  | 24176.99  | 25738.32  | 97180.82  | 19648.91  | 57930.13  | 40247.61  | 34506.38  | 27529.99  |

|           |           |           |           |           |           |           |           |           |           |
|-----------|-----------|-----------|-----------|-----------|-----------|-----------|-----------|-----------|-----------|
| LN499.002 |
| 30303.88  | 35082.06  | 26259.53  | 25415.01  | 17761.02  | 21394.84  | 26193.94  | 33834.19  | 32273.78  | 38270.94  |
| 36925.35  | 36135.78  | 29704.75  | 23754.15  | 19700.66  | 22107.31  | 28217.46  | 32833.11  | 33794.17  | 39472.23  |
| 31998.93  | 33143.96  | 27148.16  | 24214.43  | 19168.27  | 22484.34  | 27011.62  | 31558.46  | 34267.84  | 38386.26  |
| 32670.93  | 36528.89  | 27049.42  | 20460.59  | 19209.83  | 18677.31  | 26303.48  | 31929.06  | 33201.45  | 38746.18  |
| 28500.73  | 34451.88  | 28051.71  | 21577.48  | 17027.78  | 20602.57  | 27264.29  | 31200.99  | 32199.06  | 35948.63  |



|           |           |           |           |           |           |           |           |           |           |
|-----------|-----------|-----------|-----------|-----------|-----------|-----------|-----------|-----------|-----------|
| LN499.001 | LN499.002 | LN499.002 | LN499.002 | LN499.001 | LN499.002 | LN499.002 | LN499.002 | LN499.002 | LN499.002 |
| 40674.09  | 30207.74  | 39290.79  | 41297.21  | 28247.61  | 29634     | 24906.66  | 21680.77  | 25826.66  | 22886.33  |
| 41382.17  | 27676.86  | 40004.43  | 43306.6   | 27787.9   | 34312.86  | 23537.54  | 19117.14  | 29840.13  | 20685.1   |
| 37941.05  | 31443.61  | 39542.24  | 39386.96  | 27673.12  | 28521.14  | 25871.7   | 19395.01  | 30235.23  | 20560.57  |
| 40410.84  | 30891.24  | 36192.31  | 44647.78  | 30585.84  | 30919.15  | 24601.93  | 22130.26  | 28158.42  | 17512.85  |
| 44821.34  | 26524.58  | 38346.89  | 40095.91  | 27907.61  | 29218.86  | 24639.2   | 19521.84  | 27048.36  | 20509.16  |

|           |           |           |           |           |           |           |           |           |           |
|-----------|-----------|-----------|-----------|-----------|-----------|-----------|-----------|-----------|-----------|
| LN499.002 |
| 33478.07  | 37871.64  | 17978.11  | 15748.77  | 19752.52  | 22555.12  | 30473.67  | 21594.26  | 39450.83  | 14332.99  |
| 34777.09  | 39915.09  | 21575.25  | 15066.4   | 19042.27  | 22260.63  | 33908.58  | 23187.73  | 36215.1   | 13243.47  |
| 32085.49  | 36058.9   | 17089.7   | 14922.36  | 19612.77  | 18725.34  | 30223.73  | 20992.16  | 41311.29  | 13557.79  |
| 32971.43  | 39033.24  | 19948.69  | 17617.32  | 22686.63  | 19226.07  | 33183.71  | 23355.84  | 38338.46  | 12948.03  |
| 33792.9   | 39851.69  | 20283.61  | 17142.76  | 19012.72  | 19090.65  | 33921.2   | 22477.43  | 38633.68  | 11894.65  |

|           |           |           |           |           |           |           |           |           |           |
|-----------|-----------|-----------|-----------|-----------|-----------|-----------|-----------|-----------|-----------|
| LN499.002 |
| 41816.56  | 27751.84  | 35850.74  | 25364.42  | 23528.92  | 38612.41  | 27635.39  | 33708.7   | 30217.43  | 21828.45  |
| 39785.47  | 25058.29  | 38176.69  | 27999.32  | 23633.17  | 38607.54  | 24293.96  | 36486.17  | 26802.22  | 22277.41  |
| 39315.86  | 22901.73  | 33176.88  | 25774.51  | 23758.11  | 33924.52  | 26319.77  | 34650.33  | 27572.44  | 20747.33  |
| 40080.7   | 23888.59  | 34232.12  | 27116.58  | 20666.51  | 36348.75  | 26363.01  | 33267.88  | 30579.95  | 22981.77  |
| 40328.73  | 23483.72  | 35940.89  | 25342.39  | 23023.62  | 35607.58  | 26583.68  | 34927.23  | 27921.96  | 23714.59  |

|           |           |           |           |           |           |           |           |           |           |
|-----------|-----------|-----------|-----------|-----------|-----------|-----------|-----------|-----------|-----------|
| LN499.002 | LN499.001 | LN499.002 |
| 33656.79  | 34629.11  | 22101.35  | 33405.4   | 16979.98  | 25850.61  | 50243.71  | 16011.13  | 37688.25  | 38000.26  |
| 33450.52  | 36012.78  | 26297.47  | 32517.04  | 14758.42  | 25232.65  | 53800.73  | 17451.33  | 33296.97  | 41412.56  |
| 33638.87  | 37041.53  | 22204.25  | 34360.43  | 15958.77  | 26147.35  | 48610.42  | 14936.21  | 37497.48  | 36158.87  |
| 31456.05  | 37221.9   | 23635.15  | 35859.47  | 15806.43  | 25562.69  | 52120.14  | 15214.15  | 38377.47  | 36786.38  |
| 30767.39  | 34994.38  | 20937.12  | 36293.72  | 16112.23  | 24173.16  | 51377.82  | 13328.64  | 36639.46  | 37923.95  |

|           |           |           |           |           |           |           |           |           |           |
|-----------|-----------|-----------|-----------|-----------|-----------|-----------|-----------|-----------|-----------|
| LN499.002 | LN499.001 | LN499.002 | LN499.002 | LN499.002 | LN499.002 | LN499.001 | LN499.002 | LN499.001 | LN499.001 |
| 47081.56  | 44175.72  | 30645.03  | 19187.14  | 18651.27  | 51390.17  | 41858.83  | 32738.33  | 36734.44  | 37909.9   |
| 49940.38  | 44285.08  | 33132.74  | 20286.83  | 21033.39  | 56872.86  | 44856.53  | 29245.39  | 37736.1   | 37531.18  |
| 48143.45  | 44889.8   | 29293.72  | 17947.79  | 17605.32  | 46799.77  | 40003.74  | 34532.81  | 34440.82  | 38792.26  |
| 46690.15  | 43707.98  | 28806.34  | 18423.22  | 19740.46  | 52838.51  | 43955.36  | 33562.63  | 33357.38  | 40037.84  |
| 50258.25  | 44485.75  | 32795.3   | 18911.84  | 17140.03  | 53252.34  | 45669.32  | 33255.22  | 34457.86  | 37509.36  |

|           |           |           |           |           |           |           |           |           |           |
|-----------|-----------|-----------|-----------|-----------|-----------|-----------|-----------|-----------|-----------|
| LN499.002 |
| 46955.28  | 25774.69  | 44422.24  | 50656.9   | 17758.47  | 58251.47  | 19322.07  | 18854.94  | 18714.75  | 39908.57  |
| 44854.5   | 25806.47  | 43664.15  | 53879.28  | 17954.05  | 57455.07  | 22006.42  | 20516.58  | 17428.36  | 39595.16  |
| 45037.73  | 26110.43  | 41636.82  | 56634.64  | 19392.8   | 50558.43  | 19534.05  | 19668.25  | 15533.9   | 43405.04  |
| 48853.77  | 27152.99  | 42989.62  | 58648.72  | 19060.08  | 55130.31  | 21505.14  | 20958.22  | 15966.61  | 40555.14  |
| 41126.56  | 26762.56  | 41450.82  | 52451.27  | 19447.88  | 56238.25  | 20225.36  | 20451.05  | 18544.58  | 40421.53  |

|           |           |           |           |           |           |           |           |           |           |
|-----------|-----------|-----------|-----------|-----------|-----------|-----------|-----------|-----------|-----------|
| LN499.002 | LN499.002 | LN499.001 | LN499.002 |
| 31922.46  | 30095.24  | 27172.86  | 20344.96  | 23091.08  | 49671.51  | 33564.68  | 16405.3   | 17406.9   | 51187.31  |
| 34026.57  | 29414.84  | 31572.35  | 19959.08  | 21168.84  | 52411.39  | 28148.4   | 15600.64  | 20651.78  | 48489.98  |
| 33665.53  | 31597.4   | 28047.21  | 22752.57  | 21478.47  | 46221     | 29957.28  | 16534.9   | 16358.72  | 47155.4   |
| 33753.52  | 29650.95  | 28187.2   | 20661.61  | 19813.96  | 51899.26  | 30275.72  | 15347.13  | 19088.28  | 48327.95  |
| 36032.35  | 27815.7   | 27801.38  | 18729.55  | 20491.3   | 45908.87  | 30515.51  | 14638.93  | 17319.95  | 44370.15  |

|           |           |           |           |           |           |           |           |           |           |
|-----------|-----------|-----------|-----------|-----------|-----------|-----------|-----------|-----------|-----------|
| LN499.002 | LN499.039 | LN499.039 | LN499.182 | LN499.778 | LN500.451 | LN500.782 | LN500.829 | LN500.999 | LN501.779 |
| 17346.84  | 47274.92  | 56294.75  | 32115.69  | 88295.15  | 27832.7   | 27404.74  | 22825.05  | 55522.6   | 35451.51  |
| 17379.39  | 44087.48  | 58966.08  | 32539.29  | 65916.54  | 27299.58  | 22920.24  | 20399.95  | 58316.07  | 25288.13  |
| 16095.92  | 44286.23  | 59674.8   | 29248.97  | 71785.59  | 27844.09  | 25666.37  | 21502.85  | 58535.75  | 30614.19  |
| 17369.49  | 48213.3   | 60304.87  | 28856.51  | 96014.36  | 26527.49  | 29478.47  | 24817.86  | 58185.71  | 35309.34  |
| 14936.38  | 46550.32  | 28635.06  | 27692.62  | 103507.6  | 22972.28  | 37652.34  | 29044.55  | 59588.59  | 47056.63  |



|           |           |           |           |           |           |           |           |           |           |
|-----------|-----------|-----------|-----------|-----------|-----------|-----------|-----------|-----------|-----------|
| LN502.223 | LN502.994 | LN502.995 | LN502.995 | LN502.995 | LN502.994 | LN502.995 | LN502.995 | LN502.995 | LN502.995 |
| 6068.079  | 28098.44  | 18083.33  | 34554.82  | 14501.58  | 41791.86  | 22295.95  | 15784.21  | 21239     | 24756.36  |
| 3952.366  | 26089.78  | 18485.12  | 32263.59  | 16544.95  | 45370.69  | 22625.63  | 18959.49  | 22541     | 26839.93  |
| 7808.098  | 29222.56  | 17608.39  | 35138.15  | 13412.7   | 43260.86  | 26035.56  | 16177.99  | 24107.46  | 27164.38  |
| 10299.48  | 27753.31  | 17908.96  | 34489.97  | 15753.42  | 43057.98  | 19865.5   | 14907.71  | 21469.22  | 26195.81  |
| 10204.8   | 32586.94  | 16360.27  | 34160.73  | 12983.51  | 45834.25  | 22327.49  | 16684.9   | 20103.01  | 26094.19  |

|           |           |           |           |           |           |           |           |           |           |
|-----------|-----------|-----------|-----------|-----------|-----------|-----------|-----------|-----------|-----------|
| LN502.995 |
| 20752.54  | 24526.37  | 26817.49  | 35577.34  | 28274.8   | 27328.27  | 41300.86  | 42043.84  | 16472.23  | 23180.89  |
| 22973.65  | 25262.57  | 28920.26  | 32638.42  | 34514.21  | 26682.73  | 42880.89  | 39883.48  | 21923.35  | 21678.63  |
| 19788.33  | 25957.25  | 30446.98  | 36815.34  | 34735.18  | 26315.59  | 41386.52  | 43219.67  | 19251.01  | 24416.29  |
| 18750.74  | 27814.27  | 29139.56  | 31264.84  | 33170.25  | 25411.97  | 40299.8   | 41745.94  | 18919.4   | 23279.27  |
| 19356.01  | 25258.78  | 26171.86  | 33976.44  | 33816.22  | 26774.39  | 39661.09  | 41209.62  | 17193.26  | 21498.28  |

|           |           |           |           |           |           |           |           |           |           |
|-----------|-----------|-----------|-----------|-----------|-----------|-----------|-----------|-----------|-----------|
| LN502.995 | LN502.995 | LN502.994 | LN502.995 |
| 57451.87  | 29424.59  | 50814.19  | 38343.97  | 18122.03  | 18391.42  | 20301.58  | 28431.7   | 16482.11  | 20466.39  |
| 57127.85  | 28969.75  | 52402.23  | 40337.05  | 18180.89  | 19640.74  | 21206.47  | 27495.97  | 16866.24  | 20590.4   |
| 56525.83  | 29378.39  | 54318.93  | 43866.75  | 18903.15  | 18973.62  | 18924.62  | 30026.04  | 19057.37  | 21416.92  |
| 54435.81  | 27652.56  | 51106.6   | 40201.52  | 17400.56  | 15887.03  | 18675.99  | 26541.58  | 18123.86  | 20171.54  |
| 52283.59  | 28191.21  | 55290.13  | 32632.99  | 20421.68  | 17180.85  | 17625.36  | 27788.51  | 16777.43  | 20668     |

|           |           |           |           |           |           |           |           |           |           |
|-----------|-----------|-----------|-----------|-----------|-----------|-----------|-----------|-----------|-----------|
| LN502.995 | LN502.995 | LN502.994 | LN502.994 | LN502.995 | LN502.995 | LN502.995 | LN502.995 | LN502.995 | LN502.994 |
| 20191.49  | 34301.09  | 57084.97  | 44415.21  | 49257.08  | 54492.82  | 32895.18  | 51812.38  | 19770.54  | 64418.78  |
| 19604.89  | 36437.48  | 58404.32  | 50766.29  | 46430.87  | 55265.78  | 35573.21  | 51189.69  | 20822.31  | 62010.89  |
| 23450.63  | 35373.83  | 62883.48  | 51965.46  | 50057.18  | 54376.79  | 39395.49  | 51459.88  | 23054.57  | 67479.6   |
| 17272.25  | 34681.79  | 58728.12  | 52012.44  | 47032.63  | 53987.04  | 35808.51  | 48342.7   | 21227.62  | 60211.23  |
| 19498.4   | 36717.2   | 55940.02  | 48773.88  | 48692.51  | 53832.46  | 33826.37  | 44953.39  | 21432.61  | 65701.32  |

|           |           |           |           |           |           |           |           |           |           |
|-----------|-----------|-----------|-----------|-----------|-----------|-----------|-----------|-----------|-----------|
| LN502.995 | LN502.995 | LN502.995 | LN502.995 | LN502.994 | LN502.995 | LN502.995 | LN502.995 | LN502.995 | LN502.995 |
| 43619.48  | 27798.62  | 42092.86  | 22900.09  | 64781.79  | 27377.46  | 32888.9   | 49506.19  | 35133.1   | 50749.55  |
| 41609.17  | 30230.58  | 34715.68  | 23656.46  | 65402.58  | 27621.51  | 28477.02  | 47562.18  | 33054.51  | 48935.56  |
| 42910.02  | 28274.84  | 40934.51  | 24282.47  | 70438.59  | 28795.99  | 31309.84  | 51232.91  | 37462.37  | 51297.5   |
| 40891.17  | 32110.38  | 39730.13  | 23225.72  | 63810.32  | 24392.46  | 29389.11  | 51088.5   | 34672.12  | 54800.97  |
| 41339.71  | 31193.71  | 40202.22  | 24730.25  | 62155.59  | 27312.56  | 29867.68  | 48547.77  | 33650.72  | 50348.43  |

|           |           |           |           |           |           |           |           |           |           |
|-----------|-----------|-----------|-----------|-----------|-----------|-----------|-----------|-----------|-----------|
| LN502.995 | LN502.995 | LN502.995 | LN502.995 | LN502.995 | LN502.995 | LN502.994 | LN502.995 | LN502.995 | LN502.995 |
| 25122.42  | 32301.35  | 30385.08  | 21240.89  | 20876.76  | 17114.17  | 38880.6   | 30461.7   | 23923.56  | 23865.61  |
| 29301.89  | 31739.66  | 32606.13  | 24616.99  | 23050.5   | 17716.31  | 42355.04  | 31722.95  | 26643.79  | 20674.07  |
| 26367.8   | 32627.03  | 32954.52  | 25550.83  | 21482.53  | 16078.4   | 42106.84  | 31756.82  | 27237.07  | 22052.64  |
| 31235.76  | 31181.22  | 30937.71  | 22952.1   | 24204.22  | 16933.34  | 37279.68  | 31970.01  | 25105.67  | 24245.55  |
| 29669.22  | 30029.79  | 31691.06  | 21859.74  | 23039.71  | 16041.38  | 40253.53  | 29211.79  | 24919.6   | 21796.37  |

|           |           |           |           |           |           |           |           |           |           |
|-----------|-----------|-----------|-----------|-----------|-----------|-----------|-----------|-----------|-----------|
| LN502.995 | LN502.994 | LN502.995 |
| 24427.48  | 51236.09  | 25206.13  | 38986.08  | 26633.65  | 25405.1   | 33341.23  | 21376.51  | 34171.96  | 45044.33  |
| 20251.22  | 49204.48  | 25004.81  | 38591.66  | 23792.92  | 24737.69  | 33758.36  | 20513.76  | 35057.67  | 47879.03  |
| 21979.39  | 50300.74  | 23509.9   | 40807.17  | 24551.74  | 27343.49  | 32119.38  | 22730.2   | 35098.78  | 48492.77  |
| 20744.29  | 55362.12  | 22414.29  | 42066.38  | 24568.88  | 24657.03  | 33498.77  | 21127.32  | 34255.19  | 47992.84  |
| 21332.76  | 49776.14  | 23671.65  | 42948.25  | 26589.66  | 23690.82  | 30950.23  | 20926.29  | 33081.48  | 44154.02  |

|           |           |           |           |           |           |           |           |           |           |
|-----------|-----------|-----------|-----------|-----------|-----------|-----------|-----------|-----------|-----------|
| LN502.994 | LN502.995 |
| 46027.68  | 50163.94  | 47063.99  | 14383.06  | 20063.5   | 51924.97  | 27897.68  | 40694.92  | 21480.11  | 24359.05  |
| 46795.55  | 47839.15  | 44113.07  | 13730.28  | 21675.51  | 55020.17  | 27258.36  | 42899.07  | 21580.87  | 21617.95  |
| 51845.4   | 54788.46  | 45903.98  | 12100.18  | 20232.09  | 52999.86  | 28293.53  | 45673.17  | 22183.24  | 22422.42  |
| 45572.65  | 52663.27  | 43685.55  | 11984.61  | 19659.41  | 48859.05  | 23756.97  | 40495.54  | 22143.4   | 21356.99  |
| 47376.03  | 45526.99  | 43229.71  | 12769.28  | 19561.09  | 50389.61  | 28078.86  | 42463.53  | 23982.6   | 22059.52  |



|           |           |           |           |           |           |           |           |           |           |
|-----------|-----------|-----------|-----------|-----------|-----------|-----------|-----------|-----------|-----------|
| LN502.995 | LN502.995 | LN502.995 | LN502.994 | LN502.994 | LN502.995 | LN502.995 | LN503.053 | LN503.053 | LN503.053 |
| 49742.75  | 34458.49  | 31092.55  | 98339.54  | 38827.12  | 18975.51  | 34550.32  | 22682.63  | 17875.99  | 29182.18  |
| 47619.53  | 32310.8   | 32527.88  | 99486.45  | 38580.22  | 17259.03  | 32907.92  | 21612.07  | 16111.75  | 30232.43  |
| 53299.91  | 33666.35  | 34683.79  | 98216.39  | 38432.74  | 19283.47  | 35105.21  | 22281.77  | 14213.97  | 27037.17  |
| 50290     | 35979.76  | 30733.2   | 96661.33  | 38180.26  | 15109.43  | 32280.63  | 24580.03  | 15223.51  | 28792.7   |
| 50606.04  | 29470.51  | 33412.36  | 97997.93  | 33615.95  | 15406.38  | 32615.16  | 20837.57  | 15169.44  | 23081.38  |

|           |           |           |           |           |           |           |           |           |           |
|-----------|-----------|-----------|-----------|-----------|-----------|-----------|-----------|-----------|-----------|
| LN503.053 | LN503.775 | LN505.010 | LN505.011 | LN505.01_ | LN505.011 | LN505.010 | LN505.010 | LN505.010 | LN505.010 |
| 21055.73  | 12596.66  | 14956.09  | 53292.4   | 78745.35  | 63801.58  | 69591.73  | 58098.26  | 84824.36  | 62827.66  |
| 18879.14  | 8584.398  | 16308.2   | 47360     | 141823.7  | 59135.35  | 84666.12  | 63975.97  | 106331.9  | 84975.84  |
| 23377.89  | 11314.39  | 15206.31  | 51372.87  | 146328.7  | 46374.92  | 80256.14  | 64191.93  | 120615.3  | 90393.81  |
| 20866.09  | 16393.37  | 23688.59  | 65176.8   | 110384.1  | 50990.04  | 82408.59  | 52331.89  | 84805     | 55506.49  |
| 24762.52  | 14894.6   | 22064.9   | 75677.66  | 92108.52  | 60597.01  | 81948.59  | 82108.17  | 109047.3  | 67561.86  |

|           |           |           |           |           |           |           |           |           |           |
|-----------|-----------|-----------|-----------|-----------|-----------|-----------|-----------|-----------|-----------|
| LN505.010 | LN505.011 | LN505.010 | LN505.010 | LN505.010 | LN505.011 | LN505.010 | LN505.011 | LN505.010 | LN505.011 |
| 53073.61  | 29275.49  | 91455.84  | 53742.82  | 107961.3  | 45591.33  | 67163.86  | 80106.87  | 103537.4  | 44694.51  |
| 54462.36  | 36123.26  | 88340.98  | 76137.29  | 131030.9  | 66838.21  | 76878.27  | 65736.67  | 95823.48  | 33984.21  |
| 52063.49  | 44168.19  | 63352.45  | 63789.64  | 89253.49  | 74310.69  | 53886.68  | 67757.87  | 67949.77  | 51599.15  |
| 63256.2   | 24802.07  | 93497.01  | 98279.07  | 163391    | 58571.38  | 57597.14  | 83559.96  | 80343.44  | 30681.95  |
| 62313.91  | 29255.92  | 83513.61  | 68856.54  | 114871.9  | 49611.9   | 71136.87  | 83838.56  | 80151.55  | 36817.43  |

|           |           |           |           |           |           |           |           |           |           |
|-----------|-----------|-----------|-----------|-----------|-----------|-----------|-----------|-----------|-----------|
| LN505.010 | LN505.010 | LN505.011 | LN505.010 | LN505.011 | LN505.010 | LN505.011 | LN505.011 | LN505.010 | LN505.010 |
| 85459.01  | 130367.7  | 47840.18  | 99527.29  | 35028.81  | 119074.8  | 74021.54  | 43995.73  | 76095.69  | 48990.81  |
| 113058.8  | 68076.89  | 45355.88  | 96023.11  | 43468.69  | 79173.02  | 68913.62  | 53389.7   | 65439.52  | 47736.74  |
| 106989.7  | 88658.14  | 44497.41  | 73862.05  | 38617.95  | 135260.3  | 80935.84  | 61064.39  | 65782.86  | 51982.02  |
| 81741.88  | 79826.14  | 59988.57  | 111409.5  | 34150.04  | 74419.32  | 77026.44  | 77428.37  | 88577.41  | 60196.41  |
| 80675.1   | 91030.56  | 42369.2   | 98242.71  | 27747.33  | 123317.6  | 130128.6  | 46077.48  | 73134.75  | 57523.95  |

|           |           |           |           |           |           |           |           |           |           |
|-----------|-----------|-----------|-----------|-----------|-----------|-----------|-----------|-----------|-----------|
| LN505.011 | LN505.010 | LN505.010 | LN505.010 | LN505.011 | LN505.010 | LN505.010 | LN505.011 | LN505.011 | LN505.011 |
| 53278.43  | 86094     | 72730.92  | 86557.71  | 47725.81  | 100880.2  | 61375.7   | 25943.94  | 61178.83  | 29475.29  |
| 67204.55  | 81323.27  | 69242.34  | 68081.05  | 65319.9   | 112839.7  | 73503.74  | 36424.6   | 63363.71  | 40393.17  |
| 50095.99  | 75861.12  | 82256.46  | 80520.87  | 45007.94  | 90496.5   | 70406.89  | 29431.16  | 51905.06  | 51562.23  |
| 37742.49  | 87209.87  | 75906.87  | 76142.77  | 42388.1   | 127982.4  | 82240.8   | 30898.72  | 62968.66  | 35547.65  |
| 47176.51  | 132263.3  | 69029.44  | 68227.71  | 34094.22  | 116450    | 71119.66  | 22573.19  | 73254.6   | 45943.44  |

|           |           |           |           |           |           |           |           |           |           |
|-----------|-----------|-----------|-----------|-----------|-----------|-----------|-----------|-----------|-----------|
| LN505.010 | LN505.011 |
| 98892.71  | 23174.51  | 29253.57  | 50073.51  | 67152.29  | 78291.39  | 72324.03  | 30854.31  | 60545.77  | 60027.94  |
| 78144.73  | 22062.88  | 23154.47  | 50004.22  | 57730.98  | 45532.43  | 64138.44  | 24715.99  | 47634.52  | 43390.65  |
| 128468.4  | 25619.91  | 28008.25  | 54808.86  | 71737.21  | 65646.5   | 46475.64  | 26569.46  | 73365.02  | 62140.69  |
| 88353.86  | 19006.9   | 29232.44  | 59790.14  | 77941.56  | 51698.12  | 50759.47  | 26973.5   | 53334.42  | 57172.5   |
| 86432.02  | 23504.04  | 26751.1   | 49183.7   | 70707.23  | 56610.81  | 70771.4   | 27398.56  | 52960.42  | 43971.77  |

|           |           |           |           |           |           |           |           |           |           |
|-----------|-----------|-----------|-----------|-----------|-----------|-----------|-----------|-----------|-----------|
| LN505.011 | LN505.010 | LN505.010 | LN505.011 | LN505.011 | LN505.010 | LN505.010 | LN505.010 | LN505.010 | LN505.011 |
| 47121.76  | 46550.88  | 104319.6  | 47483.87  | 57885.66  | 89463.6   | 86285.09  | 139489.3  | 68562.56  | 59176.17  |
| 53127.3   | 63661.83  | 70041.03  | 49420.58  | 44092.61  | 100171.3  | 65423.79  | 143846.8  | 65620.32  | 58747.98  |
| 45474.16  | 50611.88  | 100852.1  | 58022.07  | 63476.37  | 106108.7  | 88134.24  | 135507.1  | 53619.6   | 57562.68  |
| 47649.52  | 53459.45  | 78400.65  | 40089.04  | 54652.69  | 76280.98  | 91796.66  | 99349.65  | 72688.77  | 56704.17  |
| 77450.63  | 48277.96  | 75845.89  | 51855.73  | 47714.2   | 69283.98  | 91516.26  | 182067.6  | 80814.39  | 83937.94  |

|           |           |           |           |           |           |           |           |           |           |
|-----------|-----------|-----------|-----------|-----------|-----------|-----------|-----------|-----------|-----------|
| LN505.010 | LN505.011 | LN505.010 | LN505.011 | LN505.010 | LN505.011 | LN505.010 | LN505.010 | LN505.011 | LN505.010 |
| 85944.88  | 65584.96  | 57448.33  | 33830.52  | 59037.8   | 72502.97  | 106165.6  | 93715.73  | 48014.86  | 69043.51  |
| 107503.5  | 54133.71  | 68000.36  | 28815.76  | 87499.21  | 68609.32  | 101043.7  | 95104.67  | 64822.8   | 46181.42  |
| 87853.15  | 51902.44  | 77093.7   | 34426.87  | 52437.01  | 49623.69  | 135737    | 104826.9  | 72581.88  | 82724.46  |
| 76811.1   | 71454.3   | 50860.92  | 34991.05  | 57918.09  | 47712.89  | 119694.9  | 77962.02  | 50040.33  | 53421.09  |
| 99962.04  | 57585.24  | 57749.03  | 29749.74  | 84622.04  | 57563.16  | 124045.8  | 81368.81  | 48370.58  | 54680.08  |



|           |           |           |           |           |           |           |           |           |           |
|-----------|-----------|-----------|-----------|-----------|-----------|-----------|-----------|-----------|-----------|
| LN505.011 | LN505.011 | LN505.010 | LN505.010 | LN505.011 | LN505.010 | LN505.010 | LN505.010 | LN505.011 | LN505.010 |
| 34976.6   | 52211.87  | 84513.82  | 79035.09  | 50550.2   | 95333.43  | 141575.2  | 44303.86  | 28782.55  | 130811.8  |
| 35378.89  | 49137.87  | 110224.7  | 90411.18  | 49833.86  | 91574.9   | 125588.9  | 60513.23  | 34000.12  | 112924.3  |
| 32175.38  | 64293.19  | 104984    | 87787.04  | 41053.61  | 126985.7  | 128383.8  | 49425.08  | 29339.67  | 131211.7  |
| 26885.21  | 61683.87  | 86929.34  | 108413.3  | 44907.72  | 107178.5  | 158235.3  | 54077.12  | 58462.74  | 140618.6  |
| 29899.57  | 54478.11  | 81071.96  | 81736.67  | 53616.82  | 114105    | 122185.8  | 44326.21  | 31125.2   | 100417.4  |

|           |           |           |           |           |           |           |           |           |           |
|-----------|-----------|-----------|-----------|-----------|-----------|-----------|-----------|-----------|-----------|
| LN505.010 | LN505.010 | LN505.011 | LN505.011 | LN505.010 | LN505.010 | LN505.011 | LN505.010 | LN505.011 | LN505.189 |
| 84767.56  | 169799.8  | 63481.53  | 33692.16  | 116799.4  | 71600.43  | 27639.68  | 81807.73  | 66821.46  | 33053.71  |
| 94801.74  | 144053.9  | 69636.02  | 26923.04  | 82027.27  | 84034.94  | 28074.58  | 86580.76  | 61908.22  | 31152.98  |
| 76341.1   | 137299.2  | 61655.21  | 27536.19  | 86098.86  | 98686.86  | 35131.5   | 71035.59  | 90196.11  | 33216.71  |
| 56623.81  | 103383.8  | 56250.72  | 33692.28  | 59383.81  | 61653.16  | 31478.03  | 46945.53  | 103560.9  | 34295.61  |
| 88149.43  | 162689.2  | 49462.27  | 34302.35  | 65771.98  | 74436.37  | 31307.46  | 66480.48  | 66959.13  | 35089.83  |

|           |           |           |           |           |           |           |           |           |           |
|-----------|-----------|-----------|-----------|-----------|-----------|-----------|-----------|-----------|-----------|
| LN506.243 | LN506.772 | LN507.478 | LN507.798 | LN508.804 | LN509.184 | LN509.185 | LN509.185 | LN509.184 | LN509.184 |
| 9327.305  | 12371.9   | 37312.72  | 15055.3   | 24713.11  | 25778.25  | 21097.5   | 25819.89  | 26486.81  | 34649.8   |
| 9311.693  | 10078.86  | 39518.86  | 14403.09  | 20526.64  | 26965.99  | 20368.13  | 27998.4   | 24672.39  | 38755.72  |
| 15825.66  | 12218.75  | 29883.31  | 14176.03  | 37781.54  | 24132.55  | 19648.43  | 24722.33  | 24909.38  | 39452.13  |
| 19953.39  | 11782.19  | 36548.22  | 13698.51  | 25732.04  | 23193.98  | 20708.71  | 25779.31  | 22265.38  | 37107.64  |
| 21270.55  | 15542.13  | 36964.69  | 8881.387  | 27215.11  | 21957.19  | 18405.92  | 25235.81  | 22416.51  | 35602.04  |

|           |           |           |           |           |           |           |           |           |           |
|-----------|-----------|-----------|-----------|-----------|-----------|-----------|-----------|-----------|-----------|
| LN509.184 | LN509.185 | LN509.184 |
| 33499.88  | 22267.29  | 24461.84  | 41120.31  | 27933.35  | 27826.96  | 47136.67  | 24576.83  | 19516.18  | 33865.96  |
| 37999.77  | 23967.75  | 26652.89  | 42274.41  | 30224.42  | 30698.77  | 45566.12  | 22738.19  | 19339.68  | 35362.22  |
| 37426.43  | 24261.93  | 30119.03  | 36288.17  | 31311.83  | 29550.65  | 44592.89  | 17889.53  | 15751.4   | 37262.55  |
| 36262     | 23933.73  | 27187.29  | 45320.93  | 23188.79  | 29468.31  | 43875.52  | 22044.72  | 18882.47  | 35793.59  |
| 38887.23  | 20582.06  | 22087.3   | 41850.01  | 28954.33  | 24700.29  | 45354.12  | 21562.12  | 19528.14  | 36011.22  |

|           |           |           |           |           |           |           |           |           |           |
|-----------|-----------|-----------|-----------|-----------|-----------|-----------|-----------|-----------|-----------|
| LN509.185 | LN509.184 | LN509.184 | LN509.185 | LN509.184 | LN509.184 | LN509.185 | LN509.184 | LN509.185 | LN509.184 |
| 17571.76  | 22384.98  | 24141.37  | 30667.61  | 39718.72  | 45569.58  | 22465.18  | 24938.43  | 33847.23  | 39695.2   |
| 23329.52  | 18646.06  | 25871.08  | 33730.63  | 40481.72  | 45954.77  | 22930.84  | 21084.89  | 28642.11  | 41485.62  |
| 16457.41  | 24331.93  | 28556.89  | 34094.81  | 37080.33  | 48759.63  | 25347.11  | 28000.99  | 28959.62  | 37780.89  |
| 19682.49  | 21199.97  | 26062.26  | 30181.23  | 40816.09  | 48056.31  | 24039.36  | 25775.8   | 30068.38  | 42850.79  |
| 19461.99  | 23178.98  | 26269.22  | 31519.8   | 42489.9   | 45347.1   | 20611.86  | 24282.48  | 32192.45  | 41006.99  |

|           |           |           |           |           |           |           |           |           |           |
|-----------|-----------|-----------|-----------|-----------|-----------|-----------|-----------|-----------|-----------|
| LN509.411 | LN509.797 | LN510.881 |
| 33970.4   | 15163.93  | 40579.19  | 67775.57  | 47063.4   | 67675.14  | 46352.62  | 48533.2   | 60963.31  | 34704.21  |
| 34736.15  | 10793.23  | 61131.24  | 109255.7  | 57155.16  | 60275.56  | 68674.3   | 45906.97  | 79853.82  | 28612.7   |
| 31057.84  | 10833.84  | 69070.9   | 54087.88  | 43785.66  | 65247.16  | 47569.38  | 40025.07  | 56594.95  | 29719.56  |
| 25407.89  | 13611     | 45799.9   | 67225.29  | 42994.78  | 62389.8   | 54298.62  | 51834.96  | 68105.11  | 33630.85  |
| 28595.14  | 15373.06  | 54767.39  | 68934.67  | 45350.81  | 61393.71  | 50625.42  | 46104.32  | 60001.67  | 32652.98  |

|           |           |           |           |           |           |           |           |           |           |
|-----------|-----------|-----------|-----------|-----------|-----------|-----------|-----------|-----------|-----------|
| LN510.881 |
| 43864.27  | 59784.17  | 48500.39  | 36326.98  | 64152.66  | 32649.19  | 63662.63  | 24817.66  | 58981.06  | 33811.54  |
| 75115     | 74763     | 61705.81  | 41757.92  | 64313.48  | 33162.24  | 64286.61  | 20648     | 45108.68  | 42162.17  |
| 50323.89  | 100116.1  | 63725.54  | 37746.99  | 87991.92  | 33293.25  | 66555.53  | 24456.74  | 47461.24  | 43341.42  |
| 50547.58  | 58062.95  | 48703.5   | 36765.88  | 66190.94  | 28933.3   | 57781.8   | 20807.6   | 58430.72  | 32684.8   |
| 49163.04  | 57433.66  | 47748     | 31670.66  | 59015.94  | 29257.63  | 60026.26  | 19642.65  | 58977.65  | 28875.64  |

|           |           |           |           |           |           |           |           |           |           |
|-----------|-----------|-----------|-----------|-----------|-----------|-----------|-----------|-----------|-----------|
| LN510.881 |
| 67865.87  | 27302.93  | 59187.49  | 59452.81  | 64593.71  | 57016.9   | 44455.77  | 44585.74  | 33269.7   | 77473.62  |
| 82242.09  | 43484.3   | 77122.24  | 56955.26  | 79652.31  | 48935.74  | 38776.24  | 47779.91  | 37063.07  | 68631.24  |
| 92524.23  | 26379.14  | 97039.38  | 77577.51  | 71252.49  | 59344.21  | 56124.21  | 48841.29  | 34937.11  | 74406.92  |
| 64180.91  | 31713.67  | 53936.71  | 60066.1   | 63630.47  | 59947.56  | 43078.68  | 45227.38  | 35443.39  | 79892.35  |
| 66298.37  | 31582     | 49822.54  | 59840.59  | 56503.48  | 49921.64  | 41777.12  | 38198.37  | 34248.35  | 76421.58  |



|           |           |           |           |           |           |           |           |           |           |
|-----------|-----------|-----------|-----------|-----------|-----------|-----------|-----------|-----------|-----------|
| LN510.881 | LN510.882 | LN510.881 |
| 44018.93  | 54946.75  | 43687.54  | 62178.68  | 73367.13  | 47473.04  | 39478.83  | 32077.59  | 44595.11  | 38065.14  |
| 50245.72  | 46314.34  | 53058.54  | 67916.08  | 88445.6   | 63609.81  | 53462     | 37848.94  | 36300.27  | 39305.81  |
| 41018.01  | 46223.77  | 52243.96  | 57679.43  | 69866.56  | 36320.23  | 42027.37  | 45313.09  | 44847.28  | 40091.2   |
| 43924.11  | 50782.46  | 39471.52  | 57620.27  | 71236.78  | 43934.11  | 42507.71  | 32213.74  | 39817.92  | 40969.1   |
| 40216.14  | 50470.59  | 45713.32  | 65989.72  | 65963.57  | 42627.98  | 38936.44  | 28644.8   | 40528.73  | 38734.49  |

|           |           |           |           |           |           |           |           |           |           |
|-----------|-----------|-----------|-----------|-----------|-----------|-----------|-----------|-----------|-----------|
| LN510.881 | LN510.881 | LN510.881 | LN510.882 | LN510.882 | LN510.881 | LN510.881 | LN510.881 | LN510.881 | LN510.881 |
| 42094.54  | 78005.42  | 52284.98  | 62848.93  | 41672.44  | 52502.9   | 63327.09  | 52165.94  | 53883.59  | 23909.91  |
| 33784.88  | 67537.67  | 53907.73  | 49688.12  | 42371.54  | 61539.6   | 81654.35  | 46626.25  | 54318.85  | 25684.48  |
| 48975.83  | 72014.02  | 42922.44  | 57505.56  | 48969.56  | 80136.2   | 56844.42  | 59033.9   | 52514.81  | 25532.56  |
| 43881.91  | 76854.12  | 53104.27  | 64300.28  | 38770.4   | 49224.9   | 64948.08  | 57458.52  | 56327.06  | 23296.62  |
| 42504.01  | 72086.45  | 54217.8   | 59253.52  | 38238.59  | 52997.74  | 58194.28  | 45620.26  | 57793.04  | 26895.09  |

|           |           |           |           |           |           |           |           |           |           |
|-----------|-----------|-----------|-----------|-----------|-----------|-----------|-----------|-----------|-----------|
| LN510.881 | LN510.882 | LN511.137 | LN511.275 |
| 34778.52  | 33034.97  | 13984.33  | 24388.01  | 22839.03  | 18080.91  | 33928.92  | 24047.77  | 37172.81  | 26671.11  |
| 35936.45  | 31769.66  | 15014.03  | 22584.56  | 20707.81  | 20105.71  | 35630.61  | 25576.33  | 39447.67  | 32179.71  |
| 38264.94  | 32148.19  | 16654.99  | 21474.01  | 20910.12  | 18463.91  | 32523.21  | 26595.28  | 41675.56  | 33366.88  |
| 40201.1   | 31981.16  | 14614.25  | 25836.62  | 24294.79  | 19493.34  | 33466.5   | 27402.75  | 41705.68  | 34502.33  |
| 33392.74  | 29577.13  | 16079.33  | 21335.67  | 20001.27  | 15807.11  | 34407.75  | 25862.06  | 38080.87  | 27738.91  |

|           |           |           |           |           |           |           |           |           |           |           |
|-----------|-----------|-----------|-----------|-----------|-----------|-----------|-----------|-----------|-----------|-----------|
| LN511.275 | LN511.792 | LN512.166 | LN512.417 |
| 28750.01  | 32430     | 40982.77  | 21820.18  | 43762.5   | 34180.37  | 28427.87  | 82617.55  | 11049.65  | 16600.36  |           |
| 28985.18  | 33164.58  | 38697.47  | 18491.9   | 40879.78  | 30905.43  | 27479.58  | 71534.86  | 9911.36   | 22289.55  |           |
| 27042.63  | 32209.06  | 41556.35  | 20848.89  | 47355.49  | 31731.16  | 28266.93  | 86155.99  | 10020.68  | 19135.28  |           |
| 33974.04  | 35003.92  | 42876.8   | 23822.85  | 44334.39  | 32795.9   | 32095.03  | 76311.52  | 13099.66  | 19913.42  |           |
| 27837.17  | 30817.72  | 39975.62  | 17642.96  | 40082.9   | 30194.23  | 28754.03  | 131527.7  | 16459.77  | 16296.11  |           |

|           |           |           |           |           |           |           |           |           |           |
|-----------|-----------|-----------|-----------|-----------|-----------|-----------|-----------|-----------|-----------|
| LN512.797 | LN513.144 | LN513.144 | LN513.144 | LN513.144 | LN514.148 | LN514.822 | LN514.994 | LN515.013 | LN515.033 |
| 19556.17  | 25500.86  | 19335.9   | 29399.53  | 38230.48  | 21850.11  | 19301.04  | 49067.17  | 47183.55  | 81343.5   |
| 17872.75  | 27589.98  | 17813.89  | 31884.54  | 35171.21  | 20351.96  | 13314.36  | 48296.67  | 46946.34  | 82249.47  |
| 15618.27  | 27460.34  | 17993.66  | 33818.86  | 40412.13  | 18503.36  | 19576.64  | 50217.91  | 50854.92  | 82190.43  |
| 23236.42  | 28278.81  | 19937.81  | 34484.78  | 37314.95  | 21191.67  | 16705.2   | 54021.14  | 55420.96  | 77747.61  |
| 22127.89  | 28875.18  | 20044.16  | 30797.02  | 35175.21  | 22802.86  | 19573.17  | 52486.99  | 48182.83  | 77829.3   |

|           |           |           |           |           |           |           |           |           |           |
|-----------|-----------|-----------|-----------|-----------|-----------|-----------|-----------|-----------|-----------|
| LN515.033 | LN515.033 | LN515.033 | LN515.033 | LN515.033 | LN515.050 | LN515.051 | LN515.051 | LN515.051 | LN515.050 |
| 42981.69  | 52370.62  | 71343.7   | 41496.3   | 39524.43  | 47021.98  | 45215.05  | 22839.52  | 58518.36  | 45519.96  |
| 47824.16  | 48546.06  | 68231.22  | 36907.28  | 38351.14  | 47234.64  | 47799.85  | 19083.08  | 55820.43  | 46728.84  |
| 38628.31  | 39430.11  | 67799.23  | 35566.45  | 39048.27  | 43750.18  | 51588.85  | 21150.33  | 60788.88  | 48795.32  |
| 39568.77  | 50396.77  | 68634.23  | 34467.04  | 37856.68  | 45464.54  | 47670.69  | 20383.86  | 56995.82  | 47510.92  |
| 41904.87  | 46692.96  | 64507.47  | 34753.04  | 34887.43  | 40709.59  | 52314.66  | 21047.79  | 60575.2   | 47617.45  |

|           |           |           |           |           |           |           |           |           |           |
|-----------|-----------|-----------|-----------|-----------|-----------|-----------|-----------|-----------|-----------|
| LN515.051 | LN515.051 | LN516.429 | LN517.03_ | LN517.030 | LN517.029 | LN517.029 | LN517.153 | LN517.779 | LN517.831 |
| 28170.22  | 35939.62  | 87201.25  | 40255.01  | 51982.26  | 40278.65  | 68334.13  | 19269.94  | 24659.78  | 23064.56  |
| 25561.05  | 36723.71  | 89792.74  | 45211.61  | 51641.7   | 42534.74  | 69850.95  | 20602.72  | 23979.92  | 17354.41  |
| 24451.16  | 34755.99  | 81269.84  | 40018.14  | 47671.7   | 42912.15  | 67486.22  | 23339.31  | 21072.71  | 20656.12  |
| 25413.7   | 38785.34  | 78437.66  | 46794.44  | 50184.35  | 42464.64  | 78086.03  | 17392.47  | 23922.33  | 23443.13  |
| 22115.42  | 34207.98  | 78218.72  | 47087.27  | 48739.57  | 45598.62  | 68684.29  | 18127.83  | 31524.27  | 23189.36  |

|           |           |           |           |           |           |           |           |           |           |
|-----------|-----------|-----------|-----------|-----------|-----------|-----------|-----------|-----------|-----------|
| LN518.827 | LN519.025 | LN519.025 | LN519.025 | LN519.025 | LN519.026 | LN519.025 | LN519.026 | LN519.025 | LN519.025 |
| 18944.92  | 72130.11  | 32327.97  | 49484.26  | 20660.86  | 26149.72  | 23406.09  | 18936.39  | 26734.92  | 34145.85  |
| 19789.62  | 73440.93  | 33658.71  | 45558.88  | 20867.54  | 26531.96  | 24621.86  | 19058.19  | 26930.82  | 35045.47  |
| 18242.31  | 74471.02  | 35362.74  | 48189.49  | 16550.04  | 25720.55  | 22808.93  | 19184.14  | 27553.97  | 33594.77  |
| 17355.74  | 73668.9   | 31491.33  | 46587.1   | 19437.61  | 24677.41  | 23934.65  | 17161.72  | 26962.67  | 37089.25  |
| 21570.69  | 77175.17  | 44869.67  | 45637.57  | 18228.93  | 22385.38  | 23918.36  | 17372.54  | 26261.24  | 32781.99  |



|           |           |           |           |           |           |           |           |           |           |
|-----------|-----------|-----------|-----------|-----------|-----------|-----------|-----------|-----------|-----------|
| LN519.026 | LN519.025 | LN519.026 | LN519.026 | LN519.026 | LN519.025 | LN519.025 | LN519.026 | LN519.025 | LN519.025 |
| 22090.4   | 34173.3   | 25818.46  | 18555.69  | 24193     | 39203.95  | 40400.18  | 20690.75  | 52731.11  | 45553.11  |
| 22511.34  | 33861.15  | 28003.29  | 18721.89  | 26346.27  | 33457.25  | 40389.39  | 19472.62  | 52383.47  | 45657.45  |
| 21797.1   | 29500     | 28012.46  | 18005.95  | 26094.34  | 33014.72  | 35559.87  | 20984.72  | 50889.52  | 48404.92  |
| 22712.25  | 35221.4   | 29291.71  | 16310.62  | 24133.9   | 34437.26  | 44158.7   | 19996.06  | 54637.49  | 41606.54  |
| 21433.95  | 39143.73  | 24909.89  | 17030.78  | 26000.77  | 38896.99  | 39005.3   | 21031.28  | 51534.16  | 44957.21  |

|           |           |           |           |           |           |           |           |           |           |
|-----------|-----------|-----------|-----------|-----------|-----------|-----------|-----------|-----------|-----------|
| LN519.025 | LN519.025 | LN519.025 | LN519.025 | LN519.025 | LN519.025 | LN519.026 | LN519.025 | LN519.025 | LN519.025 |
| 34862.01  | 65345.75  | 23324.55  | 51352.67  | 49385.09  | 41957.15  | 33063.36  | 43107.99  | 35397.07  | 68382.76  |
| 32526.1   | 64889.46  | 18797.04  | 47373.04  | 49695.09  | 38698.91  | 29094.66  | 46288.96  | 33777.95  | 69515.6   |
| 34122.49  | 65650.59  | 23506.95  | 45494.81  | 47419.21  | 33887.78  | 31511.99  | 50242.99  | 31847.48  | 62472.6   |
| 33661.38  | 64837.28  | 19742.87  | 48000.52  | 46725.71  | 34395.52  | 29639.61  | 40961.39  | 36451.21  | 61740.38  |
| 32187.57  | 66123.51  | 18709.7   | 49454.12  | 50797.62  | 38933.84  | 32056.23  | 48096.55  | 33945.4   | 62562.68  |

|           |           |           |           |           |           |           |           |           |           |
|-----------|-----------|-----------|-----------|-----------|-----------|-----------|-----------|-----------|-----------|
| LN519.025 | LN519.025 | LN519.025 | LN519.026 | LN519.025 | LN519.025 | LN519.026 | LN519.025 | LN519.026 | LN519.026 |
| 53397.71  | 42074.49  | 43965.36  | 31755.88  | 35363.88  | 48971.2   | 23884.99  | 70250.77  | 19454.78  | 24069.03  |
| 52301.74  | 41254.91  | 44471.69  | 31203.03  | 32120.58  | 45477.72  | 23726.18  | 73291.57  | 20780.52  | 23090.84  |
| 53867.5   | 37472.96  | 45803.69  | 30470.34  | 34993.43  | 41104.59  | 26001.12  | 76878.13  | 19670.97  | 22090.17  |
| 52302.43  | 40563.89  | 42879.08  | 32206.37  | 30128.87  | 45710.74  | 24006.98  | 64380.94  | 18955.36  | 25446.86  |
| 50384.93  | 39074.24  | 45965.68  | 31128.04  | 34648.82  | 43736.5   | 23345.83  | 74840.79  | 20755.71  | 21839.49  |

|           |           |           |           |           |           |           |           |           |           |
|-----------|-----------|-----------|-----------|-----------|-----------|-----------|-----------|-----------|-----------|
| LN519.025 | LN519.025 | LN519.026 |
| 61228.04  | 45320.26  | 34672.54  | 13034.78  | 16830.94  | 14152.34  | 22345.68  | 24584.19  | 15443.48  | 29383.25  |
| 66504.61  | 48206.42  | 31999.24  | 14742.87  | 17503.81  | 14219.38  | 22996.12  | 24313.14  | 16219.68  | 29834.84  |
| 63692.73  | 52115.14  | 31425.15  | 13446.74  | 19018.97  | 14240.87  | 22472.62  | 24580.45  | 15283.88  | 28030.01  |
| 66719.56  | 47119.81  | 33457.06  | 15095.26  | 18698.89  | 13411.32  | 22662.14  | 24434.24  | 15956.41  | 29021.01  |
| 55696.9   | 52216.99  | 33066.23  | 14113.52  | 18039.5   | 13234.81  | 24392.08  | 24091.4   | 14720.45  | 32823.81  |

|           |           |           |           |           |           |           |           |           |           |
|-----------|-----------|-----------|-----------|-----------|-----------|-----------|-----------|-----------|-----------|
| LN519.025 | LN519.026 | LN519.025 |
| 39519.7   | 45175.6   | 37256.06  | 35573.02  | 57358.9   | 49762.77  | 32626.17  | 31014.95  | 45871.41  | 52161.6   |
| 42848.72  | 45689.75  | 33790.76  | 35614     | 61822.47  | 46584.05  | 32069.58  | 37618.61  | 43504.73  | 54050.86  |
| 44106.97  | 48111.42  | 35903.55  | 36625.09  | 60712     | 50318.55  | 32638.19  | 33122.01  | 46116.32  | 52854.69  |
| 44928.25  | 42958.01  | 32265.1   | 35628.1   | 61634.77  | 52791.56  | 29617.08  | 31909.12  | 44013.28  | 61192.76  |
| 39319.9   | 43957.14  | 36069     | 33661.88  | 60813.42  | 49235.73  | 33625.05  | 33243.19  | 39764.18  | 50344.39  |

|           |           |           |           |           |           |           |           |           |           |
|-----------|-----------|-----------|-----------|-----------|-----------|-----------|-----------|-----------|-----------|
| LN519.025 | LN519.024 | LN519.025 | LN519.025 | LN519.025 | LN519.026 | LN519.026 | LN519.026 | LN519.025 | LN519.025 |
| 63418.25  | 44032.33  | 44856.61  | 26022.07  | 34617.73  | 29060.97  | 40736.23  | 19376.55  | 42702.92  | 60697.4   |
| 65722.69  | 44967.12  | 40998.14  | 28932.78  | 32508.36  | 28605.28  | 35026.17  | 18111.01  | 41994.39  | 54584.07  |
| 64488.68  | 46916.3   | 42761.95  | 27178.15  | 31036.03  | 26909.86  | 37046.8   | 17936.54  | 41464.94  | 59709     |
| 60272.99  | 48770.65  | 44617.77  | 28268.49  | 32088.14  | 28845.3   | 37302.54  | 18437.42  | 44530.22  | 58938.74  |
| 60615.59  | 42631.46  | 42599.98  | 26431.31  | 32478.73  | 26144.63  | 39836.97  | 17211.55  | 36502.69  | 61968.93  |

|           |           |           |           |           |           |           |           |           |           |
|-----------|-----------|-----------|-----------|-----------|-----------|-----------|-----------|-----------|-----------|
| LN519.026 | LN519.026 | LN519.025 | LN519.025 | LN519.025 | LN519.026 | LN519.025 | LN519.025 | LN519.026 | LN519.025 |
| 32678.43  | 33062.04  | 36277.58  | 39553.63  | 17997.77  | 34173.38  | 82786.18  | 53516.88  | 23149.29  | 69678.91  |
| 28967.92  | 30194.99  | 44072.64  | 36102.23  | 15970.42  | 35335.09  | 93077.22  | 52449.35  | 23463.07  | 66592.89  |
| 31825.9   | 34786.02  | 40054.74  | 39021.27  | 17785.76  | 32049.28  | 85017.49  | 52801.17  | 23830.04  | 64435.52  |
| 30180.83  | 35614.35  | 39291.06  | 41348.19  | 15787.61  | 37157.79  | 85232.15  | 56597.39  | 23382.08  | 71130.08  |
| 29612.38  | 35031.71  | 38057.17  | 37427.23  | 17852.04  | 34744.45  | 80192.43  | 53046.25  | 24980.37  | 61420.07  |

|           |           |           |           |           |           |           |           |           |           |
|-----------|-----------|-----------|-----------|-----------|-----------|-----------|-----------|-----------|-----------|
| LN519.025 | LN519.025 | LN519.026 | LN519.252 | LN519.778 | LN520.385 | LN521.165 | LN521.773 | LN522.195 | LN522.372 |
| 63762.7   | 50479.35  | 20718.54  | 20031.04  | 17416.86  | 10313.15  | 61205.89  | 45529.3   | 16520.15  | 61225.73  |
| 66256.91  | 47644.44  | 19100.61  | 26326.47  | 17731.05  | 5798.957  | 57545.63  | 44111.7   | 12255.25  | 68853.54  |
| 63734.14  | 51389.31  | 20353.43  | 26140.06  | 17350.2   | 5675.859  | 70201.27  | 61019.51  | 13704.89  | 67553.3   |
| 67299.12  | 47271.81  | 22131.99  | 21297.3   | 19090.72  | 6796.263  | 60149.66  | 76638.03  | 14245.74  | 62195.13  |
| 64888.81  | 45257.22  | 19922.83  | 26455.94  | 21996.8   | 4919.701  | 62505.76  | 56174.33  | 15062.8   | 14747.95  |



|           |           |           |           |           |           |           |           |           |           |
|-----------|-----------|-----------|-----------|-----------|-----------|-----------|-----------|-----------|-----------|
| LN522.445 | LN522.780 | LN523.001 | LN523.000 | LN523.001 | LN523.001 | LN523.001 | LN523.001 | LN523.001 | LN523.001 |
| 85059.38  | 14637.39  | 24209.88  | 96905.56  | 81394.19  | 65589.97  | 38453.25  | 56538.44  | 47056.42  | 51408.02  |
| 89661.74  | 15866.37  | 17511.66  | 62116.23  | 59340.34  | 69646.88  | 64379.99  | 88672.68  | 52872.86  | 58000.56  |
| 86820.83  | 17841.97  | 20230.84  | 74551.79  | 62072.33  | 53724.87  | 61734.87  | 76463.25  | 53629.29  | 57497.2   |
| 77744.76  | 22067.02  | 23881.44  | 72466.21  | 52258.68  | 60110.39  | 51405.01  | 67888.42  | 44197.06  | 45412.45  |
| 74735.31  | 17601.02  | 19105.79  | 82552.12  | 56540.05  | 54705.14  | 56139.36  | 73538.4   | 49864.32  | 61242.14  |

|           |           |           |           |           |           |           |           |           |           |
|-----------|-----------|-----------|-----------|-----------|-----------|-----------|-----------|-----------|-----------|
| LN523.001 |
| 50497.64  | 42004.12  | 54594.95  | 100204.5  | 44528.18  | 60896.6   | 46333.44  | 70726.79  | 78117.24  | 53781.03  |
| 92410.07  | 48583.96  | 64086.54  | 58215.06  | 43930.22  | 30198.39  | 82915.66  | 88968.61  | 53190.09  | 56064.53  |
| 58775.13  | 33922.92  | 51484.1   | 63764.84  | 45620.32  | 34889.42  | 54034.82  | 76435.73  | 62840.77  | 54295.87  |
| 55607.27  | 43172.69  | 73525.48  | 79743.48  | 63711.84  | 36818.53  | 57909.7   | 73618.44  | 52938.78  | 88352.44  |
| 67271.5   | 36732.14  | 48825.17  | 60545.45  | 45627.4   | 42650.14  | 58443.38  | 65779.02  | 61403.26  | 54091.3   |

|           |           |           |           |           |           |           |           |           |           |
|-----------|-----------|-----------|-----------|-----------|-----------|-----------|-----------|-----------|-----------|
| LN523.001 |
| 38587.8   | 50292.54  | 94296.4   | 40865.08  | 126419.6  | 57318.43  | 73415.18  | 23735.03  | 48070.04  | 110458.5  |
| 40521.01  | 54519.81  | 85907.33  | 38762.25  | 70500.49  | 32536.37  | 71715.33  | 25867.39  | 36231.07  | 82308.24  |
| 39092.14  | 61595.71  | 78449.31  | 35925.77  | 61967.54  | 44665.01  | 74045.69  | 26796.26  | 41209.44  | 89221.57  |
| 40219.14  | 53784.5   | 113979.7  | 32404.31  | 72865.46  | 47777.5   | 110750    | 32295.12  | 49913.95  | 73268.97  |
| 41531.07  | 58718.56  | 75513.26  | 40038.4   | 64112.71  | 43107.28  | 67963.11  | 30731.6   | 41359.71  | 83438.3   |

|           |           |           |           |           |           |           |           |           |           |
|-----------|-----------|-----------|-----------|-----------|-----------|-----------|-----------|-----------|-----------|
| LN523.001 |
| 103021.2  | 59531.41  | 34654.67  | 53604.46  | 37310.17  | 60579.68  | 19465.29  | 90687.98  | 57741.03  | 64767.8   |
| 94727.43  | 40117.11  | 39836.21  | 67837.98  | 39049.96  | 44039.07  | 26254.08  | 96866.11  | 49411.96  | 69399.22  |
| 88949.57  | 40069.88  | 38069.51  | 76863.05  | 45183.82  | 43118.3   | 25980.38  | 76062.2   | 43844.8   | 75889.56  |
| 104173.1  | 60073.45  | 43485.26  | 77474.66  | 36761.98  | 49501.04  | 17422.22  | 67238.68  | 46686.95  | 86461.29  |
| 83825.42  | 44053.22  | 41460.41  | 71489.38  | 50380.99  | 50661.52  | 21453.68  | 82040.93  | 42530.26  | 78728.65  |

|           |           |           |           |           |           |           |           |           |           |
|-----------|-----------|-----------|-----------|-----------|-----------|-----------|-----------|-----------|-----------|
| LN523.001 |
| 42268.62  | 61323.6   | 65978.81  | 51981.96  | 60330.18  | 59909.79  | 28319.13  | 56488.73  | 53258.74  | 63652.5   |
| 48837.42  | 67922.71  | 72162.81  | 76431.28  | 77641.27  | 49354.49  | 24965.35  | 101143.9  | 43358.22  | 99583.05  |
| 31833.94  | 53549.05  | 70003.19  | 51014.01  | 52334.9   | 53014.44  | 25253.4   | 60070.93  | 57063.55  | 76851.02  |
| 39316.47  | 50888.64  | 59990.82  | 40386.6   | 74699.79  | 32353.75  | 33552.91  | 61820.93  | 50001.36  | 80675.48  |
| 38099.5   | 57583.15  | 56414.88  | 64344.78  | 57442.22  | 49423.91  | 26638.69  | 56529.73  | 59952.58  | 77912.26  |

|           |           |           |           |           |           |           |           |           |           |
|-----------|-----------|-----------|-----------|-----------|-----------|-----------|-----------|-----------|-----------|
| LN523.001 |
| 118400.5  | 45607.91  | 30504.28  | 38805.04  | 38226.13  | 40124.4   | 98671.67  | 40613.87  | 32800.86  | 63085.57  |
| 98361.38  | 33606.47  | 18091.02  | 61734.16  | 27793.59  | 49717.13  | 150627.3  | 27870.21  | 32172.3   | 80355.47  |
| 87561.07  | 46888.33  | 26686.59  | 41744.93  | 42452.79  | 52715.1   | 103074    | 28813.34  | 29940.02  | 59580.12  |
| 132915.1  | 41906.58  | 24928.55  | 41574.93  | 38568.4   | 60958.37  | 103420.2  | 37139.35  | 39652.81  | 85080.86  |
| 69815.75  | 39329.55  | 26195.51  | 45620.83  | 37375.52  | 51257.53  | 106783.6  | 29199.74  | 31234.72  | 59241.51  |

|           |           |           |           |           |           |           |           |           |           |
|-----------|-----------|-----------|-----------|-----------|-----------|-----------|-----------|-----------|-----------|
| LN523.001 | LN523.001 | LN523.001 | LN523.001 | LN523.000 | LN523.001 | LN523.001 | LN523.001 | LN523.001 | LN523.001 |
| 45627.12  | 44540.57  | 25651.87  | 47669.3   | 100065.4  | 32623.27  | 71516.47  | 102844.6  | 51613.5   | 75352.89  |
| 46487.07  | 47747.22  | 23840.44  | 30977.32  | 97289.59  | 30430.42  | 73638.83  | 106639.6  | 48612.26  | 112249.5  |
| 44962.13  | 38576.27  | 23010.57  | 34696.09  | 101244.2  | 35726.02  | 75158.07  | 95558.12  | 49947.12  | 87553.13  |
| 50281.47  | 40110.75  | 23514.07  | 38976.29  | 90027.4   | 35067.64  | 72460.41  | 101367.4  | 50670.83  | 93611.1   |
| 37564.47  | 43872.92  | 20811.97  | 34198.03  | 110740.3  | 35162     | 77878.52  | 91397.03  | 45914.52  | 89787.18  |

|           |           |           |           |           |           |           |           |           |           |
|-----------|-----------|-----------|-----------|-----------|-----------|-----------|-----------|-----------|-----------|
| LN523.001 |
| 55869.41  | 131555.8  | 74345.85  | 84402.88  | 57630.77  | 31574.64  | 64833.46  | 22330.96  | 69925.17  | 46191.11  |
| 59165.03  | 103385.1  | 68443.15  | 110076    | 73832.6   | 31900.23  | 41530.41  | 22198.81  | 67190     | 39314.06  |
| 75185.11  | 89690.09  | 60945.13  | 95474.86  | 70584.61  | 27023.86  | 53257.44  | 23704.63  | 71954.95  | 42269.3   |
| 80674.94  | 79957.66  | 65498.23  | 85904.5   | 84033.51  | 38259.11  | 65828.32  | 21061.06  | 65650.98  | 35512.19  |
| 69206.45  | 95927.1   | 67440.09  | 88181.23  | 72434.25  | 28640.25  | 50287.13  | 19420.13  | 69417.07  | 43869.16  |



|           |           |           |           |           |           |           |           |           |           |
|-----------|-----------|-----------|-----------|-----------|-----------|-----------|-----------|-----------|-----------|
| LN523.001 | LN523.019 | LN523.019 | LN523.02_ |
| 41471.44  | 37632.51  | 73062.05  | 42875.65  | 34541.19  | 23919.67  | 25322.5   | 66567.63  | 60004.12  | 69506.54  |
| 42394.88  | 39893.7   | 46796.01  | 50912.14  | 39344.28  | 24826.04  | 27107.34  | 75813.44  | 62372.94  | 76146.75  |
| 42503.21  | 42678.05  | 50431.52  | 55258.49  | 45708.07  | 23761.15  | 26472.37  | 79601.28  | 59976.53  | 70806.29  |
| 34661.93  | 39265.04  | 77706.93  | 52763.87  | 38271.13  | 25755.17  | 26945.81  | 77538.14  | 68781.7   | 76502.89  |
| 43213.55  | 46371.26  | 52180.7   | 54464.49  | 44564.22  | 24069.87  | 25759.23  | 80864.86  | 71226.59  | 73677.98  |

|           |           |           |           |           |           |           |           |           |           |
|-----------|-----------|-----------|-----------|-----------|-----------|-----------|-----------|-----------|-----------|
| LN523.020 | LN523.040 | LN523.040 | LN523.275 | LN523.776 | LN524.776 | LN524.848 | LN524.849 | LN524.849 | LN524.848 |
| 64451.87  | 79730.1   | 82461.76  | 27786.23  | 26744.04  | 96630.92  | 25945.89  | 30256.94  | 23942.21  | 45219.68  |
| 62581.85  | 78436.47  | 78803.59  | 29102.59  | 22518.47  | 77270.93  | 29131.16  | 27108.98  | 27931.92  | 54824.22  |
| 71261.85  | 81171.79  | 79133.81  | 28259.84  | 23253.6   | 82993.99  | 24345.94  | 27976.55  | 22199.99  | 54539.7   |
| 66351.58  | 79972.57  | 78264.92  | 29519.43  | 19378.48  | 106416.8  | 21308.88  | 25447.22  | 20860.94  | 57159.03  |
| 69996.43  | 79600.19  | 80720.55  | 29491.07  | 22818.13  | 121519.3  | 22269.28  | 24931.01  | 21748.44  | 54318.62  |

|           |           |           |           |           |           |           |           |           |           |
|-----------|-----------|-----------|-----------|-----------|-----------|-----------|-----------|-----------|-----------|
| LN524.848 | LN524.849 | LN524.849 | LN524.849 | LN524.849 | LN524.849 | LN525.036 | LN525.036 | LN525.162 | LN525.162 |
| 22912.67  | 23425.51  | 22122.25  | 22277.88  | 20203.06  | 19991.44  | 34865.82  | 28285.23  | 28690.07  | 18006     |
| 27551.75  | 24642.38  | 16728.69  | 19268.76  | 19161.94  | 19668.62  | 20717     | 20097.81  | 27800.44  | 17030.7   |
| 21172.03  | 21377.42  | 19414.92  | 21306.25  | 14916.81  | 21397.87  | 36334.4   | 26634.88  | 26380.35  | 20906.68  |
| 23192.47  | 18728.87  | 20428.41  | 19925.62  | 18886.69  | 18982.74  | 37968.77  | 30449     | 26776.62  | 18637.49  |
| 23668.65  | 16734.17  | 16688.29  | 21820.44  | 17455.76  | 18562.8   | 35934.18  | 28175.03  | 23467.43  | 17499.63  |

|           |           |           |           |           |           |           |           |           |           |
|-----------|-----------|-----------|-----------|-----------|-----------|-----------|-----------|-----------|-----------|
| LN525.162 | LN525.162 | LN525.162 | LN525.777 | LN526.776 | LN526.976 | LN526.975 | LN526.975 | LN526.976 | LN526.976 |
| 31340.81  | 28166.95  | 23128.09  | 14339.24  | 33607.9   | 42232.73  | 52244.23  | 45227.03  | 32084.18  | 51852.31  |
| 35918.67  | 26989.56  | 22549.46  | 13895.75  | 38194.68  | 40911.63  | 50726.29  | 46131.08  | 29911.58  | 48994.12  |
| 37021.43  | 31604.1   | 22043.84  | 13283.2   | 40014.28  | 36950.36  | 50736.08  | 46961.18  | 29760.17  | 53469.36  |
| 34672.83  | 25777.39  | 23044.94  | 13470.57  | 54081     | 43649.03  | 51008.27  | 44204.84  | 28129.16  | 55349.17  |
| 33749.77  | 26892.54  | 21611.1   | 17649.79  | 59792.42  | 40300.37  | 47475.95  | 44676.67  | 29888.95  | 48300.72  |

|           |           |           |           |           |           |           |           |           |           |
|-----------|-----------|-----------|-----------|-----------|-----------|-----------|-----------|-----------|-----------|
| LN526.976 | LN527.033 | LN527.051 | LN527.052 | LN527.052 | LN527.182 | LN528.774 | LN529.156 | LN529.157 | LN529.156 |
| 36841.07  | 35838.85  | 15788.98  | 20174.46  | 20053.24  | 66674.26  | 18321.71  | 28371.29  | 29754.38  | 22688.11  |
| 43307.75  | 33497.95  | 15741.32  | 22562.55  | 19627.23  | 67818.73  | 14403.43  | 27570.59  | 26512.19  | 22871.14  |
| 41401.63  | 36063.71  | 14832.84  | 22384.45  | 16870.8   | 75344.64  | 18558.22  | 28035.49  | 28446.92  | 23334.53  |
| 40110.35  | 36067.36  | 16217.72  | 21566.49  | 17556.05  | 71531.19  | 17424.5   | 33839.86  | 26621.61  | 23704.65  |
| 41421.46  | 36230.64  | 14351.68  | 20816.58  | 22958.51  | 60438.45  | 21143.95  | 33641.92  | 25009.53  | 23186.89  |

|           |           |           |           |           |           |           |           |           |           |
|-----------|-----------|-----------|-----------|-----------|-----------|-----------|-----------|-----------|-----------|
| LN529.157 | LN529.156 | LN529.280 | LN531.287 | LN532.401 | LN532.789 | LN532.808 | LN533.004 | LN533.090 | LN533.09_ |
| 26532.58  | 28476.38  | 276607.8  | 15313.68  | 64645.77  | 17707.98  | 15214.14  | 23267.99  | 22475.42  | 29773.89  |
| 32762.68  | 41397.67  | 272238.3  | 17109.04  | 69248.78  | 18836.19  | 13514.19  | 23023.05  | 21973.17  | 31516.67  |
| 31153.48  | 30680.39  | 304147    | 21039.13  | 70198.94  | 15341.77  | 10971.9   | 23356.58  | 20513.54  | 24841.01  |
| 26825.08  | 29237.91  | 285633.9  | 19604.2   | 64644.68  | 17649.81  | 15801.94  | 22583.03  | 19134.01  | 26173.25  |
| 29150.71  | 28380.48  | 297871.3  | 15108.53  | 55136.07  | 19757.49  | 16062.14  | 24097.34  | 19919.43  | 26488.31  |

|           |           |           |           |           |           |           |           |           |           |
|-----------|-----------|-----------|-----------|-----------|-----------|-----------|-----------|-----------|-----------|
| LN533.090 | LN533.143 | LN533.219 | LN533.455 | LN533.773 | LN534.402 | LN534.782 | LN534.803 | LN535.002 | LN535.783 |
| 35355.61  | 8609.857  | 32463.01  | 22748.66  | 34206.91  | 22770.46  | 107149.9  | 136901.3  | 47524.51  | 13790.59  |
| 26339.32  | 9927.898  | 31838.81  | 27083.44  | 25202.17  | 21319.26  | 90111.47  | 119147.8  | 47538.44  | 18058.18  |
| 34289.99  | 9174.184  | 31964.08  | 23949.5   | 21385.57  | 19891.38  | 148916.7  | 112794.8  | 47534.9   | 13965.49  |
| 33574     | 10724.98  | 27986.09  | 17491.39  | 35853.76  | 18416.54  | 169215.5  | 116896    | 48776.45  | 15228.55  |
| 29947.82  | 13893.05  | 30803.98  | 22017.43  | 43186.87  | 16021.1   | 126105.7  | 176084    | 49143.86  | 20548.82  |

|           |           |           |           |           |           |           |           |           |           |
|-----------|-----------|-----------|-----------|-----------|-----------|-----------|-----------|-----------|-----------|
| LN535.806 | LN536.784 | LN536.804 | LN537.016 | LN537.017 | LN537.016 | LN537.017 | LN537.016 | LN537.017 | LN537.016 |
| 17882.73  | 34066.41  | 28546.74  | 48151.79  | 49424.14  | 59954.87  | 16435.75  | 68072.41  | 37757.22  | 106971    |
| 15818.01  | 36156.62  | 43273.21  | 48430.52  | 52196.41  | 63408.73  | 14408.63  | 79195.32  | 46750.98  | 74106.36  |
| 15833.6   | 33135.96  | 32620.26  | 54277.37  | 57013.71  | 72201.43  | 12625.5   | 80716.88  | 47851.21  | 72046.1   |
| 18425.53  | 32255.61  | 26746.48  | 50824.14  | 54598.88  | 65536.4   | 13491.41  | 74522.34  | 49975.71  | 66932.67  |
| 16953.76  | 36019.53  | 40712.78  | 42864.18  | 42280.35  | 94237.16  | 20376.99  | 72369.76  | 51918.07  | 91093.17  |



|           |           |           |           |           |           |           |           |           |           |
|-----------|-----------|-----------|-----------|-----------|-----------|-----------|-----------|-----------|-----------|
| LN537.016 | LN537.016 | LN537.017 | LN537.016 | LN537.017 | LN537.017 | LN537.016 | LN537.016 | LN537.016 | LN537.017 |
| 102032.2  | 56861.11  | 70005.14  | 65220.2   | 64037.86  | 32352.06  | 74463.73  | 81112.74  | 103211.2  | 74069.98  |
| 97578.16  | 63601.9   | 66364.97  | 85395.51  | 63222.43  | 41309.16  | 71376.7   | 65684.05  | 106248.2  | 65543.82  |
| 97484.77  | 59697.81  | 60086.97  | 77957.37  | 67551.24  | 40214.92  | 59883.56  | 69027.51  | 108380.4  | 58828.68  |
| 97715.23  | 58233.25  | 61640.29  | 81557.36  | 60849.09  | 39919.78  | 59451.19  | 68422.62  | 109940.5  | 65101.35  |
| 89954.31  | 60964.91  | 64332.07  | 95241.11  | 57815.67  | 33734.03  | 70050.74  | 85932.26  | 120799.3  | 55331.29  |

|           |           |           |           |           |           |           |           |           |           |
|-----------|-----------|-----------|-----------|-----------|-----------|-----------|-----------|-----------|-----------|
| LN537.017 | LN537.016 | LN537.016 | LN537.016 | LN537.016 | LN537.017 | LN537.016 | LN537.017 | LN537.017 | LN537.017 |
| 32421.17  | 56317.88  | 94762.36  | 65000.53  | 65028.48  | 33132.4   | 108685.3  | 67797.18  | 45060.67  | 48718.58  |
| 44400.47  | 74820.22  | 93569.11  | 66960.02  | 70776.08  | 38193.05  | 68837.84  | 66421.18  | 33047.81  | 48323.76  |
| 44501.6   | 81330.36  | 83489.83  | 63478.62  | 74321.74  | 38996.06  | 65482.84  | 64532.54  | 33123.61  | 45745.21  |
| 44334.13  | 77806.59  | 89841.21  | 66970.91  | 69919.92  | 41341.99  | 59715.7   | 54533.55  | 32184.15  | 39624.01  |
| 42130.29  | 55069.82  | 103414.8  | 66929.95  | 68633.12  | 43953.96  | 61696.34  | 60072.75  | 35766.3   | 35254.99  |

|           |           |           |           |           |           |           |           |           |           |
|-----------|-----------|-----------|-----------|-----------|-----------|-----------|-----------|-----------|-----------|
| LN537.016 | LN537.017 | LN537.016 | LN537.017 | LN537.017 | LN537.016 | LN537.017 | LN537.017 | LN537.017 | LN537.017 |
| 75513.4   | 32560.96  | 96759.98  | 69841.06  | 57963.03  | 72985.04  | 49895.77  | 67224.82  | 43592.64  | 73603.99  |
| 70627.41  | 35286.29  | 92917     | 65176.97  | 34043.05  | 69775.23  | 51211.39  | 60993.95  | 40780.8   | 52614.83  |
| 75222.05  | 35973.31  | 93499.23  | 64067.44  | 34111.44  | 76059.5   | 46937.58  | 62597.13  | 39115.04  | 55443.82  |
| 68320.21  | 37835.9   | 86950.98  | 57124.18  | 33621.71  | 73602.13  | 49830.04  | 59576.82  | 45521.78  | 49304.19  |
| 85381.48  | 42396.61  | 82582.18  | 90835.57  | 32079.38  | 94363.18  | 52600.47  | 76878.5   | 47444.78  | 53089.66  |

|           |           |           |           |           |           |           |           |           |           |
|-----------|-----------|-----------|-----------|-----------|-----------|-----------|-----------|-----------|-----------|
| LN537.017 | LN537.017 | LN537.017 | LN537.017 | LN537.017 | LN537.017 | LN537.016 | LN537.017 | LN537.017 | LN537.017 |
| 40532.81  | 58916.73  | 45741.3   | 31941.21  | 27135.29  | 44189.84  | 60964.6   | 38254.13  | 48054.31  | 22548.7   |
| 50659.15  | 50527.19  | 50508.93  | 46426.24  | 30229.66  | 39836.68  | 46425.99  | 28635.38  | 40558.12  | 23462.03  |
| 52856.24  | 60389.92  | 57041.7   | 45930.38  | 30847.25  | 42960.08  | 54099.81  | 28403.08  | 44529.81  | 23028.08  |
| 50388.27  | 53895.75  | 56670.48  | 49568.85  | 30311.59  | 41316.36  | 53386.68  | 29576.91  | 40755.97  | 23989.01  |
| 55630.65  | 70393.48  | 57544     | 65785.9   | 34399.07  | 32042.39  | 51359     | 35289     | 40304.28  | 33951.05  |

|           |           |           |           |           |           |           |           |           |           |
|-----------|-----------|-----------|-----------|-----------|-----------|-----------|-----------|-----------|-----------|
| LN537.017 |
| 29383.93  | 42370.03  | 30073.99  | 39605.54  | 34978.28  | 47030.72  | 31008.37  | 28912.15  | 38371.35  | 30711.3   |
| 42807.04  | 38966.54  | 25344.51  | 42116.49  | 38812.31  | 39463.45  | 33143.42  | 28731.85  | 22535.07  | 27744.49  |
| 43497.06  | 34101.57  | 27180.34  | 46874.07  | 38713.18  | 38183.62  | 30292.76  | 32649.5   | 22546.63  | 23740.46  |
| 41635.49  | 37245.11  | 29034.43  | 44021.27  | 39254.43  | 40498.85  | 30083.22  | 36863.36  | 20639.58  | 27119.83  |
| 43167.13  | 50291.33  | 42215.71  | 29326.83  | 33327.42  | 55064.18  | 44299.2   | 38569.02  | 23413.9   | 20902.18  |

|           |           |           |           |           |           |           |           |           |           |
|-----------|-----------|-----------|-----------|-----------|-----------|-----------|-----------|-----------|-----------|
| LN537.016 | LN537.017 |
| 72377.29  | 29689.96  | 23060.56  | 66756.44  | 32093.46  | 42111.44  | 44849.87  | 25617.9   | 55382.11  | 31882.29  |
| 52402.68  | 24045.66  | 18917.81  | 48984.92  | 28975.79  | 26618.01  | 41659.45  | 25141.2   | 48246.09  | 34527.29  |
| 50413.74  | 27273.61  | 25683.7   | 45412.41  | 25920.08  | 28578.92  | 40800.24  | 28424.1   | 48157.67  | 37102.91  |
| 49589.44  | 24501.27  | 21909.47  | 49616.54  | 26369.12  | 30752.55  | 38676.99  | 22112.21  | 56251.77  | 37437.29  |
| 64692.42  | 21414.59  | 13272.5   | 41556.83  | 34571.19  | 37678.35  | 37546.31  | 27741.25  | 40130.09  | 43309.62  |

|           |           |           |           |           |           |           |           |           |           |
|-----------|-----------|-----------|-----------|-----------|-----------|-----------|-----------|-----------|-----------|
| LN537.017 | LN537.017 | LN537.016 | LN537.017 | LN537.016 | LN537.017 | LN537.017 | LN537.017 | LN537.017 | LN537.017 |
| 21595.03  | 42042.83  | 84802.98  | 19657.63  | 53759.53  | 47218.58  | 41748.72  | 28497.55  | 25058.62  | 48084.66  |
| 19579.11  | 45126.24  | 74188.14  | 24491.35  | 52888.05  | 29614.08  | 34819.37  | 35781.91  | 20589.84  | 35568.33  |
| 17977.81  | 48251.94  | 74870.95  | 24384.7   | 50149.92  | 30816.53  | 31813.16  | 34540.03  | 18537.29  | 43251     |
| 14744.9   | 46951.91  | 75472.35  | 23706.79  | 51648.55  | 32229.88  | 35248.62  | 35229.05  | 16176.34  | 39770.09  |
| 22616.2   | 53436.28  | 71447.73  | 23753.02  | 59740.23  | 31231.84  | 32643.62  | 35348.33  | 24694.88  | 46450.92  |

|           |           |           |           |           |           |           |           |           |           |
|-----------|-----------|-----------|-----------|-----------|-----------|-----------|-----------|-----------|-----------|
| LN537.017 | LN537.017 | LN537.017 | LN537.017 | LN537.017 | LN537.018 | LN537.018 | LN537.018 | LN537.018 | LN537.018 |
| 88288.41  | 37492.72  | 47881.5   | 18112.51  | 52150.99  | 29466.79  | 34560.84  | 42057.89  | 34314.89  | 61625.99  |
| 67656.26  | 37727.8   | 45782.6   | 18483.31  | 42373.38  | 28141.73  | 35650.12  | 41407.29  | 33496.22  | 58483.53  |
| 64936.68  | 38474.64  | 48599.73  | 18542.26  | 42972.72  | 28984.77  | 37050.88  | 45192.65  | 35178.75  | 59314.09  |
| 62387.92  | 42031.15  | 44680.8   | 16773.35  | 43156.21  | 26843.08  | 36034.48  | 39002.47  | 34132.83  | 67263.61  |
| 51262.45  | 30752.54  | 71036.21  | 16439.38  | 67188.8   | 27416.42  | 38116.55  | 42966.73  | 34540.4   | 54483.58  |



|           |           |           |           |           |           |           |           |           |           |
|-----------|-----------|-----------|-----------|-----------|-----------|-----------|-----------|-----------|-----------|
| LN537.018 | LN537.137 | LN537.216 | LN537.216 | LN537.216 | LN537.216 | LN537.254 | LN537.254 | LN537.255 | LN537.254 |
| 40685.3   | 52118.21  | 26388.89  | 23301.3   | 25509.39  | 27285.32  | 21563.44  | 18161.52  | 20728.47  | 22384.69  |
| 42369     | 49359.79  | 28421.4   | 22012.28  | 27770.18  | 27101.18  | 21474.33  | 21943.63  | 21003.77  | 22228.27  |
| 46512.16  | 56394.69  | 25342.11  | 21464.78  | 26794.46  | 28316.91  | 20115.56  | 20586.8   | 19306.59  | 22182.68  |
| 41836.26  | 45331.39  | 22074.49  | 21124.58  | 28999.02  | 28105.92  | 24584.48  | 18238.33  | 22341.73  | 18951.08  |
| 38408.07  | 42886.21  | 23856.42  | 19906.47  | 27048.15  | 24857.13  | 20082.74  | 18900.4   | 20547.56  | 23224.95  |

|           |           |           |           |           |           |           |           |           |           |
|-----------|-----------|-----------|-----------|-----------|-----------|-----------|-----------|-----------|-----------|
| LN537.254 | LN537.255 | LN537.254 | LN537.255 | LN537.254 | LN537.254 | LN537.255 | LN537.255 | LN538.780 | LN538.800 |
| 21508.71  | 17214.21  | 33147.44  | 21019.53  | 28313.42  | 22670.05  | 32385.11  | 31928.17  | 16829.35  | 15055.65  |
| 20505.98  | 18231.33  | 32839.85  | 21451.22  | 27601.81  | 23432.63  | 31643.24  | 31869.29  | 16886.47  | 14936.44  |
| 21423.15  | 16804.3   | 34829.54  | 22519.35  | 31802.47  | 24994.84  | 35581.1   | 31331.66  | 16234.14  | 15563.18  |
| 21535.82  | 20027.27  | 34870.87  | 21498.69  | 30318.56  | 24534.01  | 32340.67  | 31814.06  | 15839.54  | 16531.97  |
| 18782.57  | 18189.27  | 32520.22  | 23210.75  | 25897.73  | 24305.48  | 32126.59  | 32807.57  | 17584.9   | 14705.97  |

|           |           |           |           |           |           |           |           |           |           |
|-----------|-----------|-----------|-----------|-----------|-----------|-----------|-----------|-----------|-----------|
| LN539.033 | LN539.033 | LN539.033 | LN539.034 | LN539.033 | LN539.033 | LN539.139 | LN539.168 | LN539.177 | LN539.178 |
| 26291.11  | 24577.23  | 39084.73  | 41183     | 27281.28  | 24670.16  | 20839.12  | 23987.71  | 31176.3   | 29430.44  |
| 36210.24  | 24212.67  | 47427.28  | 52168.75  | 26331.76  | 34300.82  | 18315.26  | 24947.73  | 30681.55  | 27668.17  |
| 34869.91  | 26829.53  | 48324.82  | 50077.5   | 29064.37  | 30260.52  | 22808.03  | 16607.48  | 31129.38  | 28938.95  |
| 33212.56  | 26065.31  | 46525.15  | 51928.8   | 32877.26  | 28030.18  | 18449.06  | 29531.23  | 28439.37  | 24499.42  |
| 29561     | 27605.35  | 46200.23  | 57864.68  | 30709.44  | 29227.46  | 23025.84  | 25507.01  | 24922.04  | 26854.19  |

|           |           |           |           |           |           |           |           |           |           |
|-----------|-----------|-----------|-----------|-----------|-----------|-----------|-----------|-----------|-----------|
| LN539.178 | LN539.178 | LN539.178 | LN539.178 | LN539.178 | LN539.786 | LN539.787 | LN539.787 | LN539.787 | LN540.747 |
| 33815.56  | 27107.3   | 23064.11  | 22524.97  | 27314.2   | 30955.86  | 27889.89  | 24714.87  | 43626.98  | 30950.06  |
| 32226.47  | 25864.34  | 24050.75  | 24956.62  | 27748.93  | 29848.08  | 32191.97  | 22915.7   | 49763.61  | 25441.19  |
| 30206.57  | 25832.48  | 22328.41  | 24574.74  | 22636.98  | 34409.03  | 27083.69  | 25486.15  | 43714     | 29499.86  |
| 31614.97  | 23419.7   | 21198.99  | 19995.46  | 29072.83  | 29257.71  | 27052.88  | 24131.88  | 48775.11  | 31798.32  |
| 31652.59  | 25424.11  | 21055.28  | 23591.08  | 26090.48  | 24997.44  | 27166.9   | 18141.36  | 41040.86  | 38461.7   |

|           |           |           |           |           |           |           |           |           |           |
|-----------|-----------|-----------|-----------|-----------|-----------|-----------|-----------|-----------|-----------|
| LN540.820 | LN541.030 | LN541.029 | LN541.030 | LN541.030 | LN541.030 | LN542.179 | LN542.747 | LN542.821 | LN542.988 |
| 47595.63  | 59765.24  | 58191.31  | 65767.89  | 59835.28  | 116230    | 29655.21  | 16642.16  | 24755.54  | 40593.26  |
| 49803.49  | 59877.5   | 56179.62  | 64056.56  | 61530.59  | 108027.1  | 31493.98  | 20600.49  | 29067.46  | 45253.84  |
| 50336.75  | 49497.28  | 62375.37  | 55799.4   | 57877.08  | 115463.3  | 34721.31  | 22078.05  | 24908.66  | 43892.12  |
| 57542.35  | 54057.65  | 52516.27  | 61301.97  | 56592.1   | 113025.6  | 24346.06  | 20790.18  | 25183.6   | 41727.19  |
| 39904.18  | 44453.46  | 56168.13  | 51959.95  | 56514.02  | 101714    | 25714.58  | 20765.2   | 25808.18  | 43635.59  |

|           |           |           |           |           |           |           |           |           |           |
|-----------|-----------|-----------|-----------|-----------|-----------|-----------|-----------|-----------|-----------|
| LN542.988 | LN542.988 | LN542.988 | LN543.046 | LN543.181 | LN543.466 | LN543.781 | LN544.745 | LN544.764 | LN545.276 |
| 39960.53  | 44109.86  | 31803.92  | 38946.72  | 12882.15  | 13042.72  | 15786.81  | 14679.68  | 9287.687  | 67682.94  |
| 38474.3   | 43748.06  | 32121.23  | 42374.63  | 14049.16  | 13824.03  | 18589.79  | 9595.939  | 9347.663  | 80790.73  |
| 40306     | 44761.74  | 31537.37  | 37477.26  | 13990.92  | 17791.41  | 13922.88  | 8746.366  | 7629.822  | 93720.94  |
| 41003.53  | 44789.9   | 31018.87  | 36530.23  | 12654.91  | 12251.55  | 17091.71  | 8777.748  | 9560.24   | 73407.47  |
| 38303.98  | 41973.28  | 31422.38  | 33132.52  | 13941.31  | 14929.51  | 16302.95  | 11841.83  | 14386.9   | 66661.56  |

|           |           |           |           |           |           |           |           |           |           |
|-----------|-----------|-----------|-----------|-----------|-----------|-----------|-----------|-----------|-----------|
| LN547.057 | LN547.057 | LN547.057 | LN547.058 | LN548.780 | LN549.102 | LN549.102 | LN549.102 | LN549.102 | LN549.102 |
| 54725.18  | 33223.76  | 41400.5   | 37957.27  | 40691.62  | 36216.16  | 23921.37  | 26618.49  | 28712.85  | 30039.3   |
| 52963.96  | 31616.25  | 43420.74  | 35962.31  | 41499.64  | 35090.03  | 26193.24  | 30470.54  | 26420.7   | 34044.02  |
| 49295.75  | 30971.43  | 44758.81  | 33893.23  | 50111.43  | 29610.29  | 24403.8   | 25534.24  | 26075.33  | 30012.61  |
| 48923.5   | 32390.82  | 41349.42  | 33535.12  | 58059.3   | 30633.23  | 27207.17  | 26923.64  | 26918.51  | 31040.94  |
| 55544.56  | 33040.69  | 46331.09  | 36631.45  | 69511.36  | 31077.69  | 23470.39  | 24778.14  | 26544.41  | 28512.11  |

|           |           |           |           |           |           |           |           |           |           |
|-----------|-----------|-----------|-----------|-----------|-----------|-----------|-----------|-----------|-----------|
| LN549.102 | LN549.103 | LN549.103 | LN549.103 | LN549.197 | LN549.254 | LN549.254 | LN549.525 | LN550.200 | LN550.529 |
| 28888.01  | 23884.52  | 29163.69  | 24079.16  | 105153.7  | 22069.95  | 22237.55  | 57075.73  | 17092.12  | 13031.71  |
| 32343.68  | 27033.07  | 26726.19  | 25031.8   | 124523.2  | 27095.38  | 21546.26  | 46957.43  | 16801.65  | 13379.22  |
| 29775.22  | 22332.39  | 28833.41  | 27534.99  | 107363.5  | 21516.78  | 21900.24  | 65593.81  | 17265.88  | 14483.41  |
| 30959.86  | 24087.71  | 24365.9   | 19865.9   | 109168.8  | 23871.82  | 20449.09  | 60777.98  | 15815.86  | 13028.96  |
| 30402.88  | 25457.42  | 28822.17  | 24862.8   | 80421.22  | 20831.61  | 19925.57  | 59267.96  | 18697.91  | 15980.82  |



|           |           |           |           |           |           |           |           |           |           |           |
|-----------|-----------|-----------|-----------|-----------|-----------|-----------|-----------|-----------|-----------|-----------|
| LN550.776 | LN551.032 | LN551.231 | LN551.231 | LN551.231 | LN551.231 | LN551.231 | LN551.231 | LN551.270 | LN551.270 | LN551.270 |
| 277529.1  | 54424.69  | 36869.6   | 28946.62  | 37035.34  | 21263.18  | 26354.58  | 20974.11  | 16106     | 21624.86  |           |
| 262933.1  | 53575.95  | 34724.44  | 26851.87  | 36721.74  | 20659.88  | 23571.27  | 21917.44  | 12487.27  | 21644.3   |           |
| 295737.2  | 56231.37  | 37633.72  | 24033.61  | 34416.71  | 20340.76  | 27936.04  | 19282.57  | 13456.89  | 20866.99  |           |
| 339089.6  | 54862.57  | 35029     | 23862.19  | 37088.17  | 21191.67  | 25858.25  | 21249.24  | 13458.48  | 23863.42  |           |
| 415566.4  | 56075.7   | 35718.76  | 27781.33  | 36499.89  | 23037.06  | 23319.94  | 23257.36  | 13156.56  | 23911.07  |           |

|           |           |           |           |           |           |           |           |           |           |
|-----------|-----------|-----------|-----------|-----------|-----------|-----------|-----------|-----------|-----------|
| LN551.270 | LN551.270 | LN551.778 | LN552.723 | LN552.776 | LN553.029 | LN553.029 | LN553.049 | LN553.049 | LN553.049 |
| 22773.7   | 22505.56  | 47070.12  | 18323.54  | 150473.7  | 33833.98  | 35485.75  | 43553     | 38442.06  | 37822.82  |
| 24720.24  | 22768.71  | 47809.3   | 15316.34  | 128545.8  | 33062.31  | 43848.85  | 46038.16  | 38009.15  | 42147.15  |
| 22670.73  | 21013.64  | 52053.92  | 19613.24  | 150498.3  | 32637.41  | 37009.69  | 40385.97  | 38258.9   | 40713     |
| 25700.27  | 21704.01  | 50465.48  | 25313.07  | 169274.8  | 34460.8   | 39453.08  | 42104.27  | 37438.86  | 35179.16  |
| 22448.23  | 24746.85  | 62245.53  | 31105.12  | 200192.4  | 34205.75  | 37014.83  | 43943.95  | 23527.2   | 39456.75  |

|           |           |           |           |           |           |           |           |           |           |
|-----------|-----------|-----------|-----------|-----------|-----------|-----------|-----------|-----------|-----------|
| LN553.048 | LN553.049 | LN553.049 | LN553.050 | LN553.194 | LN553.194 | LN553.194 | LN553.195 | LN553.195 | LN553.495 |
| 36684.83  | 48182.88  | 33405.43  | 35931.47  | 19542.58  | 23348.19  | 26916.03  | 23864.45  | 27221.72  | 52532.23  |
| 32083.83  | 51785.14  | 36649.89  | 31205.81  | 24415.36  | 19434.92  | 28254.67  | 23819.27  | 25278.79  | 54128.54  |
| 36114.63  | 48214.54  | 34119.88  | 34684.85  | 23254.46  | 19919.41  | 26519.67  | 20002.32  | 22866.41  | 43216.73  |
| 38566.08  | 43379.75  | 33275.35  | 33758.63  | 26031.58  | 22093.7   | 27710.8   | 26224.9   | 23260.58  | 24828.87  |
| 21557.88  | 47184.42  | 33239.85  | 30064.77  | 23973.42  | 23727.17  | 27454.92  | 26002.59  | 28183.67  | 30671.1   |

|           |           |           |           |           |           |           |           |           |           |
|-----------|-----------|-----------|-----------|-----------|-----------|-----------|-----------|-----------|-----------|
| LN553.778 | LN554.498 | LN554.718 | LN554.752 | LN554.773 | LN554.989 | LN555.006 | LN555.008 | LN555.008 | LN555.008 |
| 23819.26  | 17587.15  | 91490.07  | 56600.94  | 63517.36  | 67151.07  | 71806.6   | 46130.38  | 36076.75  | 24572.94  |
| 22900.55  | 17454.95  | 86091.78  | 67419.55  | 68485.54  | 65503.06  | 124748.1  | 54091.64  | 47264.02  | 19944.51  |
| 22653.47  | 15510.75  | 82729.29  | 66079.32  | 56850.08  | 64463.02  | 69342.99  | 54196.15  | 30898.68  | 22132.54  |
| 26052.65  | 13494.38  | 112022.9  | 62855.07  | 54599.98  | 60336.18  | 67553.03  | 44326.33  | 42723.37  | 27649.57  |
| 31357     | 14022.27  | 144191.9  | 62165.19  | 80585.11  | 60136.9   | 69371.54  | 42249.97  | 38273.59  | 24850.73  |

|           |           |           |           |           |           |           |           |           |           |
|-----------|-----------|-----------|-----------|-----------|-----------|-----------|-----------|-----------|-----------|
| LN555.008 | LN555.007 | LN555.008 | LN555.008 | LN555.008 | LN555.007 | LN555.008 | LN555.008 | LN555.008 | LN555.008 |
| 34248.73  | 58494.01  | 53057.79  | 36058.44  | 39342.39  | 63332.83  | 43541.23  | 23748.14  | 35243.09  | 38412.72  |
| 29910.26  | 61773.62  | 61170.58  | 53160.93  | 49583.84  | 58836.46  | 48972.35  | 22306.17  | 43655.97  | 39310.39  |
| 45109.92  | 72000.1   | 59608.6   | 29056.28  | 37842.4   | 48793.39  | 41724.3   | 20573.92  | 40659.15  | 46065.74  |
| 37836.73  | 56504.4   | 60232.97  | 33671.2   | 34897.56  | 69912.87  | 42051.48  | 21647.51  | 35269.08  | 41727.66  |
| 35194.68  | 54107.66  | 54406.79  | 34464.13  | 35441.59  | 68376.43  | 39789.52  | 24897.67  | 31770.46  | 37456.54  |

|           |           |           |           |           |           |           |           |           |           |
|-----------|-----------|-----------|-----------|-----------|-----------|-----------|-----------|-----------|-----------|
| LN555.008 | LN555.008 | LN555.008 | LN555.008 | LN555.007 | LN555.007 | LN555.008 | LN555.008 | LN555.008 | LN555.008 |
| 36279.03  | 63515.08  | 85528.71  | 57661.17  | 61379.94  | 51741.53  | 58491.66  | 53460.92  | 33159.59  | 57377.52  |
| 34393.45  | 82529.71  | 69195.26  | 82193.02  | 64986.36  | 60594.15  | 66265.76  | 46378.58  | 39465.9   | 56861.73  |
| 52738.67  | 67198.02  | 70386.13  | 57096.91  | 100650.4  | 72976.56  | 68638.51  | 53455.77  | 55258.6   | 51629.5   |
| 40115.92  | 64743.64  | 81283.51  | 56386.11  | 70886.28  | 50861.76  | 57549.88  | 49173.64  | 33008.45  | 53979.21  |
| 34438.39  | 59679.51  | 74795.72  | 51823.83  | 69827.27  | 56123.8   | 63408.19  | 46885.6   | 37935.7   | 52478.27  |

|           |           |           |           |           |           |           |           |           |           |
|-----------|-----------|-----------|-----------|-----------|-----------|-----------|-----------|-----------|-----------|
| LN555.008 | LN555.008 | LN555.008 | LN555.007 | LN555.008 | LN555.008 | LN555.008 | LN555.008 | LN555.008 | LN555.008 |
| 42510.22  | 27784.04  | 42861.3   | 87961.9   | 51173.7   | 29746.03  | 27450.82  | 16528.34  | 54304.97  | 29286.77  |
| 43713.91  | 28623.08  | 53483.67  | 77125.25  | 40783.58  | 32638.69  | 39354.65  | 17463.44  | 41128.68  | 33123.96  |
| 65286.22  | 34070.96  | 71462.23  | 116555.9  | 52880.85  | 26006.04  | 43987.2   | 22446.41  | 70698.39  | 27504.53  |
| 41380.95  | 30064.35  | 45848.29  | 85642.41  | 52637.69  | 30716.49  | 29211.69  | 17149.18  | 54908.8   | 29593.68  |
| 37102.38  | 27067.15  | 46465.36  | 83501.11  | 54503.18  | 31515.44  | 29365.26  | 16177.61  | 54454.02  | 23459.92  |

|           |           |           |           |           |           |           |           |           |           |
|-----------|-----------|-----------|-----------|-----------|-----------|-----------|-----------|-----------|-----------|
| LN555.008 | LN555.007 | LN555.007 |
| 18300.9   | 46361.64  | 38010.46  | 23244.08  | 38492.54  | 48734.55  | 65590.88  | 52581.33  | 62947.47  | 32331.13  |
| 23715.61  | 56969.03  | 33310.7   | 19125.87  | 54354.73  | 44989.88  | 67877.65  | 39603.66  | 70215.59  | 38928.18  |
| 19347.43  | 68687.75  | 29807.12  | 18333.43  | 72110.03  | 55597.71  | 59535.95  | 60916.37  | 61707.68  | 43824.59  |
| 21122.09  | 52562.48  | 41872.05  | 20258.72  | 37850.85  | 51491.8   | 67591.28  | 56105.85  | 59166.37  | 37486.87  |
| 20738.06  | 50602.55  | 40951.42  | 21983.57  | 34491.49  | 47781.57  | 62912.37  | 57570.26  | 60296.11  | 36120.09  |



|           |           |           |           |           |           |           |           |           |           |
|-----------|-----------|-----------|-----------|-----------|-----------|-----------|-----------|-----------|-----------|
| LN555.008 | LN555.007 | LN555.008 | LN555.007 | LN555.007 | LN555.008 | LN555.008 | LN555.007 | LN555.008 | LN555.008 |
| 38001.68  | 56259.84  | 71439.89  | 94596.21  | 73132.92  | 32901.31  | 43378.88  | 47993.95  | 40201.53  | 33207.47  |
| 53159.43  | 57977.89  | 66002.14  | 95186.29  | 74685.4   | 58306.77  | 42357.13  | 76627.48  | 46267.35  | 62529.65  |
| 49614.11  | 68748.21  | 70912.18  | 91208.37  | 68063.02  | 52993.71  | 71088.5   | 59215.03  | 35235.5   | 45447.81  |
| 40889.99  | 55679     | 68886.75  | 84901.94  | 78438.68  | 34733.47  | 41355.77  | 52842.12  | 38745.74  | 36656.72  |
| 34001.11  | 58148.55  | 64568.16  | 93514.73  | 69619.67  | 35109.22  | 45357.67  | 50173.96  | 33722.79  | 36179.21  |

|           |           |           |           |           |           |           |           |           |           |
|-----------|-----------|-----------|-----------|-----------|-----------|-----------|-----------|-----------|-----------|
| LN555.008 | LN555.007 | LN555.008 | LN555.008 | LN555.008 | LN555.008 | LN555.008 | LN555.007 | LN555.008 | LN555.008 |
| 45902.98  | 58902.24  | 33234.41  | 47550     | 16386.82  | 50499.81  | 19124.25  | 93192.01  | 56876.62  | 32726.84  |
| 56497.54  | 74751.27  | 32809.15  | 73683.71  | 17957.96  | 45462.33  | 24267.41  | 82813.32  | 46784.16  | 36309.59  |
| 48370.37  | 71201.9   | 43311.85  | 57553.21  | 16930.1   | 52089.85  | 11409.62  | 85332.23  | 67717.7   | 35889.03  |
| 45986.07  | 58578.6   | 34202.76  | 42608.87  | 19106.6   | 50908.19  | 20689.57  | 87141.43  | 57354.24  | 31606.63  |
| 43827.7   | 53282.04  | 31046.5   | 46527.09  | 18288.07  | 55342.5   | 20307.47  | 95642.41  | 53236.57  | 31303.53  |

|           |           |           |           |           |           |           |           |           |           |
|-----------|-----------|-----------|-----------|-----------|-----------|-----------|-----------|-----------|-----------|
| LN555.008 | LN555.008 | LN555.008 | LN555.008 | LN555.008 | LN555.007 | LN555.007 | LN555.007 | LN555.008 | LN555.008 |
| 30212.64  | 53977.71  | 49392.55  | 57152.5   | 43930.63  | 70364.29  | 69623.65  | 50468.74  | 24107.13  | 25136.67  |
| 40757.29  | 52867.76  | 38542.72  | 51163.47  | 35586.85  | 62681.87  | 60925.13  | 81298.58  | 51801.32  | 21422.97  |
| 40618.78  | 59992.05  | 53772.57  | 53356.98  | 45766.52  | 92777.21  | 61394.9   | 89534.48  | 28336.51  | 26348.92  |
| 31867.06  | 60879.54  | 50281.63  | 53361.3   | 42606.68  | 71079.81  | 63683.31  | 55061.51  | 28514.58  | 30195.01  |
| 27884.14  | 54559.64  | 54726.69  | 61398.94  | 39279.06  | 77400.15  | 63069.11  | 51031.87  | 26278.72  | 29268.49  |

|           |           |           |           |           |           |           |           |           |           |
|-----------|-----------|-----------|-----------|-----------|-----------|-----------|-----------|-----------|-----------|
| LN555.008 | LN555.007 | LN555.007 | LN555.008 | LN555.008 | LN555.007 | LN555.008 | LN555.008 | LN555.027 | LN555.213 |
| 23015.72  | 32020.5   | 82879.11  | 34673.18  | 52602.87  | 69772.07  | 34776.18  | 26521.23  | 74315.96  | 95336.05  |
| 17999.54  | 27683.58  | 112218.3  | 33328.57  | 53303.68  | 80899.16  | 42894.63  | 27680.82  | 67393.91  | 96352.61  |
| 24534.52  | 32127.62  | 94085.12  | 26834.09  | 54671.84  | 65951.04  | 36790.31  | 48788.5   | 64422.23  | 85162.2   |
| 18632.8   | 29462.42  | 80634.33  | 32675.71  | 51872.21  | 70750.8   | 34504.9   | 28477.91  | 67776.22  | 94989.05  |
| 18452.74  | 29430.49  | 81716.48  | 35902.12  | 52364.7   | 67074.78  | 33613.09  | 29996.13  | 63384.87  | 76225.05  |

|           |           |           |           |           |           |           |           |           |           |
|-----------|-----------|-----------|-----------|-----------|-----------|-----------|-----------|-----------|-----------|
| LN555.266 | LN555.265 |
| 17932.74  | 24376.71  | 27979.05  | 27210.45  | 37512.18  | 34515.84  | 24268.02  | 39484.24  | 49215.76  | 27700.18  |
| 22887.96  | 24913.89  | 28049.54  | 34050.46  | 32622.49  | 39578.2   | 26686.78  | 42529.49  | 49564.62  | 27512.61  |
| 23242.17  | 20947.65  | 33171.27  | 32865.68  | 33287.04  | 35423.53  | 23727.82  | 44182.22  | 56836.78  | 24481.29  |
| 21718.01  | 21139.54  | 34062.09  | 34786.18  | 38500.68  | 39246.62  | 24517.04  | 43555.23  | 54808.95  | 25657.09  |
| 24962.45  | 20076.42  | 28764.69  | 29677.33  | 32040.02  | 35484.29  | 22436.76  | 45068.41  | 50811.31  | 23545.46  |

|           |           |           |           |           |           |           |           |           |           |
|-----------|-----------|-----------|-----------|-----------|-----------|-----------|-----------|-----------|-----------|
| LN555.265 | LN555.265 | LN555.755 | LN555.775 | LN556.718 | LN556.752 | LN556.772 | LN556.881 | LN557.187 | LN557.187 |
| 26533.18  | 31604.22  | 13704.5   | 12583.97  | 31144.5   | 25111.29  | 22746.95  | 26876.69  | 16471.88  | 20955.95  |
| 27891.48  | 36245.63  | 12648.32  | 11559.3   | 24714.54  | 26564.16  | 24451.56  | 29408.83  | 16232.2   | 22618.8   |
| 21850.03  | 35488.81  | 14425.54  | 13670.28  | 30892.14  | 28553.96  | 24712.23  | 23317.26  | 14077.94  | 22883.98  |
| 28803.06  | 30788.17  | 18071.68  | 16109.48  | 34387.97  | 25801.19  | 26404     | 20723.15  | 12482.76  | 20667.76  |
| 24012.51  | 32996.34  | 19116.27  | 17461.71  | 44498.83  | 35492.26  | 20884.38  | 22613.13  | 15816.88  | 20865.35  |

|           |           |           |           |           |           |           |           |           |           |
|-----------|-----------|-----------|-----------|-----------|-----------|-----------|-----------|-----------|-----------|
| LN557.187 | LN557.188 | LN557.188 | LN557.188 | LN557.240 | LN557.772 | LN558.714 | LN558.750 | LN558.770 | LN558.982 |
| 29365.56  | 26627.12  | 20921.85  | 39458.31  | 41462.12  | 13729.2   | 13596.12  | 14608.32  | 12499.02  | 30811.12  |
| 28137.41  | 29179.27  | 20544.18  | 41044.2   | 42538.7   | 13934.62  | 11993.39  | 14712.56  | 9915.029  | 28833.06  |
| 28749.97  | 29237.46  | 21213.75  | 36102.06  | 68611.21  | 13915.04  | 11063.52  | 12997.12  | 9924.847  | 29937.95  |
| 27027.07  | 27183.88  | 23070.33  | 36670.75  | 86297.84  | 14210.32  | 11536.49  | 14246.99  | 12979.34  | 28242.96  |
| 26519.59  | 27555.48  | 19003.16  | 36759.97  | 94123.81  | 14563.55  | 17073.86  | 21641.36  | 13180.24  | 29748.53  |

|           |           |           |           |           |           |           |           |           |           |
|-----------|-----------|-----------|-----------|-----------|-----------|-----------|-----------|-----------|-----------|
| LN558.982 | LN558.983 | LN559.215 | LN560.997 | LN560.997 | LN560.997 | LN560.997 | LN560.997 | LN560.997 | LN560.998 |
| 34356.01  | 38941.33  | 7541.797  | 40194.54  | 34398.98  | 39823.38  | 25598.08  | 34771.14  | 37661.67  | 40893.29  |
| 34557.78  | 36720.74  | 8109.453  | 38593.75  | 30821.01  | 33138.87  | 26728.38  | 32663.12  | 44297.74  | 41624.52  |
| 31548.29  | 38152.59  | 10507.91  | 35454.35  | 35527.08  | 35241     | 28323     | 31698.34  | 37749.78  | 39683.07  |
| 33751.33  | 38863.87  | 12183.03  | 37435.58  | 31787.96  | 39871.13  | 25372.38  | 32205.13  | 42010.31  | 42774.78  |
| 33644.63  | 38555.78  | 12812.14  | 35516.85  | 32094.4   | 33476.73  | 27813.59  | 33956.41  | 41878.69  | 36776.11  |



|           |           |           |           |           |           |           |           |           |           |
|-----------|-----------|-----------|-----------|-----------|-----------|-----------|-----------|-----------|-----------|
| LN560.998 |
| 35972.75  | 38689.38  | 29757.38  | 34359.95  | 32663.09  | 42514.47  | 42723.87  | 42886.63  | 45924.47  | 31769.09  |
| 38352.3   | 39750.71  | 33417.45  | 37594.17  | 35713.14  | 44276.23  | 42573     | 42761.1   | 44139.36  | 30847.86  |
| 39874.37  | 35459.89  | 27424.07  | 33925.73  | 33516.62  | 41803.89  | 42410.76  | 42220.89  | 47114.62  | 31229.05  |
| 36085.01  | 43128.95  | 36359.16  | 37645.64  | 34670.71  | 41908.99  | 39779.64  | 42381.38  | 48909     | 32624.91  |
| 37558.82  | 35157.03  | 32777.07  | 33534.31  | 30335.36  | 45893.72  | 38505.44  | 39500.23  | 48876.67  | 27684.15  |

|           |           |           |           |           |           |           |           |           |           |
|-----------|-----------|-----------|-----------|-----------|-----------|-----------|-----------|-----------|-----------|
| LN560.998 | LN560.998 | LN560.998 | LN560.998 | LN560.998 | LN560.998 | LN561.037 | LN561.037 | LN561.037 | LN561.036 |
| 27468.21  | 29049.71  | 38892.5   | 28992.83  | 45552.46  | 26721.99  | 48644.47  | 77690.5   | 73075.53  | 39143.23  |
| 27228.02  | 30019.39  | 36837.36  | 27921.37  | 42629.52  | 25289.84  | 48514.74  | 74068.91  | 79788.36  | 39952.32  |
| 30772.65  | 27294.76  | 31952.1   | 30304.14  | 45044.54  | 26812.78  | 50968.63  | 78184.66  | 75690.29  | 46204.26  |
| 28185.38  | 31063.47  | 40576.71  | 26611.7   | 45965.16  | 27074.84  | 50974.28  | 77286.51  | 73057.43  | 38992.72  |
| 30418.07  | 32525.63  | 35912.93  | 28578.82  | 44695.36  | 30098.52  | 47457.73  | 73368.75  | 74853.08  | 43059.54  |

|           |           |           |           |           |           |           |           |           |           |
|-----------|-----------|-----------|-----------|-----------|-----------|-----------|-----------|-----------|-----------|
| LN561.037 | LN562.777 | LN563.119 | LN563.231 | LN563.231 | LN563.232 | LN563.231 | LN563.230 | LN563.232 | LN563.232 |
| 58598.03  | 12966.16  | 22746.07  | 24435.38  | 25760.05  | 23158.61  | 25201.83  | 24809.28  | 22452.12  | 18565.84  |
| 58138.47  | 9026.32   | 22050.43  | 25056.55  | 24445.04  | 22398.97  | 21745.46  | 23979.36  | 24568.78  | 19339.98  |
| 56135.72  | 10997.48  | 20171.17  | 25659.64  | 25808.9   | 23104.62  | 20989.34  | 25579.62  | 22838.31  | 18266.88  |
| 57140.99  | 11725.64  | 17428.11  | 25441.87  | 22933.97  | 26939.29  | 21529.55  | 25660.57  | 24350.44  | 18627.6   |
| 53916.62  | 15695.88  | 19759.91  | 23200.25  | 25601.01  | 21216.75  | 23416.25  | 27961.68  | 23560.3   | 21128.68  |

|           |           |           |           |           |           |           |           |           |           |
|-----------|-----------|-----------|-----------|-----------|-----------|-----------|-----------|-----------|-----------|
| LN563.231 | LN563.232 | LN563.232 | LN564.344 | LN564.345 | LN565.114 | LN565.114 | LN565.169 | LN565.211 | LN565.211 |
| 24562.08  | 24246.01  | 26335.4   | 2142122   | 19736.52  | 23018.52  | 22351.84  | 65328.27  | 32243.2   | 25149.36  |
| 24893     | 21897.95  | 29462.53  | 2286623   | 22620.42  | 24659.71  | 23606.36  | 67066.03  | 35014.3   | 24256.9   |
| 20451.69  | 25565.98  | 28823.82  | 2224036   | 20190.27  | 18089.67  | 20447.84  | 65116.96  | 31486.67  | 22781.9   |
| 25244.74  | 26384.23  | 26866.27  | 2077560   | 16250.84  | 21809.59  | 23307.53  | 65491.05  | 36066.14  | 20349.44  |
| 22372.19  | 26215.31  | 31424.35  | 2158740   | 19361.96  | 23976.06  | 21194.56  | 58102.98  | 26939.21  | 23626.25  |

|           |           |           |           |           |           |           |           |           |           |           |
|-----------|-----------|-----------|-----------|-----------|-----------|-----------|-----------|-----------|-----------|-----------|
| LN565.211 | LN565.211 | LN565.210 | LN565.211 | LN565.211 | LN565.211 | LN565.211 | LN565.211 | LN565.211 | LN565.247 | LN565.248 |
| 25739.77  | 25780.11  | 27454.42  | 27788.51  | 39725.67  | 29370.19  | 21815.29  | 20650.92  | 44147.4   | 26549.11  |           |
| 24701.74  | 26047.71  | 24633.9   | 24984.09  | 37159.49  | 28201.53  | 25055.84  | 24243.51  | 45940.61  | 30564.15  |           |
| 27703.29  | 26011.02  | 26513.65  | 26694.22  | 44513.61  | 30015.62  | 20988.34  | 20586.42  | 41109.96  | 28701.9   |           |
| 25704.36  | 27162.36  | 27582.14  | 27296.97  | 37662.41  | 27703.06  | 25157.52  | 20571.72  | 42691.7   | 28972.71  |           |
| 24641.62  | 25639.42  | 26819.56  | 23510.11  | 39886.95  | 24689.92  | 21633.6   | 20335.95  | 42737.16  | 26876.09  |           |

|           |           |           |           |           |           |           |           |           |           |
|-----------|-----------|-----------|-----------|-----------|-----------|-----------|-----------|-----------|-----------|
| LN565.248 | LN566.988 | LN566.988 | LN566.988 | LN566.989 | LN566.989 | LN566.989 | LN566.989 | LN566.989 | LN567.048 |
| 22960.91  | 48181.41  | 56840.88  | 41524.81  | 40601.71  | 41119.18  | 56475.39  | 42352.15  | 54262.81  | 33221.44  |
| 21741.76  | 53211.44  | 55961.3   | 38063.42  | 33085.53  | 40677.47  | 54057.13  | 45238.84  | 51676.69  | 40608.7   |
| 20095.81  | 20136.61  | 50620.32  | 42601.78  | 33659.87  | 39098.08  | 53758.64  | 38516.67  | 46818.12  | 34563.79  |
| 20421.6   | 52344.29  | 53882.37  | 40061.52  | 35284.48  | 40597.36  | 53738.85  | 45529     | 53936.76  | 34920.07  |
| 22158.89  | 51626.05  | 52555.52  | 40383.25  | 34349.9   | 38203.9   | 52084.39  | 45025.27  | 50456.09  | 32862.2   |

|           |           |           |           |           |           |           |           |           |           |
|-----------|-----------|-----------|-----------|-----------|-----------|-----------|-----------|-----------|-----------|
| LN567.170 | LN567.227 |
| 23787.16  | 26158.3   | 38223.29  | 40068.8   | 16533.07  | 16552.1   | 18834.53  | 28886.95  | 23618.03  | 13936.54  |
| 22170.2   | 23439.11  | 34270.29  | 43037.85  | 18077.6   | 19662.72  | 18684.85  | 32991.52  | 23727.42  | 11637.08  |
| 19791.88  | 25069.48  | 34054.9   | 38971.77  | 16981.25  | 17937.03  | 21148.21  | 28889.83  | 23744.02  | 12448.92  |
| 19492.08  | 27290.28  | 40799.45  | 39941.97  | 22553.2   | 21046.61  | 25229.59  | 29899.96  | 25264.88  | 11828.8   |
| 20594.22  | 23662.66  | 35837     | 39654.89  | 18116.87  | 17385.03  | 17966.57  | 28502.89  | 22430.42  | 11664.5   |

|           |           |           |           |           |           |           |           |           |           |           |
|-----------|-----------|-----------|-----------|-----------|-----------|-----------|-----------|-----------|-----------|-----------|
| LN567.227 | LN567.227 | LN567.227 | LN567.302 | LN567.301 | LN567.301 | LN567.301 | LN567.301 | LN567.301 | LN567.302 | LN567.301 |
| 33941.4   | 35920.75  | 29177.25  | 22282.54  | 23371.27  | 26274.49  | 27446.56  | 14431.51  | 17342.94  | 26603.6   |           |
| 32523.62  | 36428.22  | 29644.87  | 23799.71  | 22284.27  | 27304.28  | 26575.16  | 17672.07  | 20199.49  | 27906.35  |           |
| 32772.25  | 34781.61  | 30112.94  | 22283.55  | 21903.15  | 26839.1   | 30332.58  | 16822.22  | 19632.91  | 25993.6   |           |
| 41432.68  | 38087.34  | 32856.88  | 22749.09  | 26469.67  | 24796.86  | 28053.25  | 17372.48  | 20688.32  | 27169.3   |           |
| 35069.72  | 28132.79  | 29596.65  | 23947.4   | 23782.17  | 23362.65  | 26349.34  | 14968.57  | 18124.85  | 27527.71  |           |



|           |           |           |           |           |           |           |           |           |           |
|-----------|-----------|-----------|-----------|-----------|-----------|-----------|-----------|-----------|-----------|
| LN567.302 | LN567.301 | LN567.301 | LN567.302 | LN567.536 | LN567.727 | LN567.765 | LN568.725 | LN569.022 | LN569.045 |
| 22534.44  | 26001.53  | 34200.73  | 18480.96  | 19642.53  | 46883.52  | 14053.36  | 17521.66  | 52504.53  | 70335.89  |
| 24912.24  | 23946.7   | 31927.54  | 17720.98  | 17741.71  | 37809.04  | 15103.93  | 10059.98  | 53719.23  | 76021.16  |
| 24910.86  | 20875.06  | 33312.72  | 18617.34  | 18245.93  | 40909.89  | 16643.59  | 14482.38  | 61096.41  | 68109.57  |
| 25056.29  | 20821.34  | 35276.49  | 19657.07  | 15826.43  | 45932.08  | 11944.4   | 16548.65  | 51082.93  | 72839.39  |
| 22567.81  | 21734.41  | 33330.95  | 19376.56  | 13468.69  | 51737.27  | 11917.96  | 23709.76  | 53426.98  | 66737.09  |

|           |           |           |           |           |           |           |           |           |           |           |
|-----------|-----------|-----------|-----------|-----------|-----------|-----------|-----------|-----------|-----------|-----------|
| LN569.045 | LN569.045 | LN569.045 | LN569.206 | LN569.207 | LN569.207 | LN569.207 | LN569.207 | LN569.207 | LN569.727 | LN571.001 |
| 72676.88  | 61874.39  | 90803.1   | 25282.09  | 24710.44  | 25643.5   | 27143.96  | 25217.54  | 19817.52  | 23731.48  |           |
| 69597.06  | 59681.89  | 81339.65  | 22738.59  | 23296.44  | 25493.54  | 27838.45  | 27852.86  | 21059.43  | 23480.44  |           |
| 68163.6   | 58401.44  | 91232.99  | 21514.78  | 28293.32  | 20826.03  | 26547.33  | 20957.2   | 17816.73  | 18821.65  |           |
| 69865.49  | 65736.66  | 93468.94  | 21382.54  | 22492.73  | 23209.44  | 23091.71  | 25388.6   | 20332.47  | 20985.55  |           |
| 67480.59  | 59201.75  | 95868.2   | 23277.77  | 22118.71  | 23530.27  | 29035.07  | 22794.26  | 23750.49  | 19940.94  |           |

|           |           |           |           |           |           |           |           |           |           |
|-----------|-----------|-----------|-----------|-----------|-----------|-----------|-----------|-----------|-----------|
| LN571.001 | LN571.000 | LN571.001 |
| 29993.8   | 28866.47  | 36097.62  | 32237.31  | 35650.9   | 31295.46  | 31331.51  | 40884.15  | 35312.13  | 26360.91  |
| 27780.09  | 26867.29  | 37963.68  | 31679.96  | 38282.05  | 32583.21  | 31601.59  | 39187.8   | 34232.89  | 27440.68  |
| 25134.8   | 22551.45  | 32055.31  | 26095.45  | 33495.72  | 30313.8   | 28059.58  | 33020.58  | 28249.13  | 31897.05  |
| 26758.33  | 30057.4   | 37060.61  | 30392.03  | 35441.83  | 30461.39  | 29705.89  | 37481.96  | 36541.48  | 25710.02  |
| 26477.15  | 27999.73  | 37287.29  | 32702.59  | 40120.8   | 33705.96  | 31484.56  | 39434.54  | 31684.14  | 27315.06  |

|           |           |           |           |           |           |           |           |           |           |
|-----------|-----------|-----------|-----------|-----------|-----------|-----------|-----------|-----------|-----------|
| LN571.000 | LN571.001 | LN571.020 | LN571.020 | LN571.021 | LN571.040 | LN571.040 | LN571.041 | LN571.040 | LN571.040 |
| 24005.2   | 35941     | 39485.36  | 42562.49  | 23963.71  | 36179.27  | 29990.85  | 33871.58  | 34374.19  | 42752.33  |
| 24362.09  | 35793.79  | 38551.27  | 45490.32  | 24123.74  | 37789.13  | 27838.05  | 34878.72  | 33865.26  | 45169.27  |
| 20011.93  | 35040.05  | 36206.98  | 43980.07  | 23218.17  | 31667.79  | 26720.45  | 34873.29  | 39528.96  | 43734.65  |
| 24401.89  | 38821.38  | 35695.13  | 38634.56  | 23782.8   | 34934.62  | 28404.15  | 33708.36  | 34729.02  | 42743.29  |
| 22272.76  | 39288.14  | 37609.03  | 43999.93  | 23884.77  | 32136.56  | 26467.83  | 32476.81  | 39440.22  | 40683.21  |

|           |           |           |           |           |           |           |           |           |           |
|-----------|-----------|-----------|-----------|-----------|-----------|-----------|-----------|-----------|-----------|
| LN571.040 | LN571.497 | LN571.497 | LN571.498 | LN572.500 | LN573.493 | LN574.266 | LN574.497 | LN574.995 | LN574.994 |
| 35713.91  | 30235.38  | 658229.5  | 31352.65  | 233557.9  | 183909    | 14896.92  | 63918.53  | 33480.3   | 26740.89  |
| 35593.41  | 25501.82  | 610248.1  | 32881.63  | 221184.4  | 184669.7  | 15500.26  | 63436.37  | 38886.13  | 30686.86  |
| 36532.84  | 28036.98  | 638869.3  | 27458.57  | 236458.4  | 176325.2  | 13157.46  | 64655.15  | 41488.58  | 33965.52  |
| 35641.2   | 25656.76  | 647031.8  | 32033.62  | 142451.8  | 147976.5  | 10469.34  | 57564.8   | 41765.83  | 30486.54  |
| 40120.8   | 30215.09  | 630890.4  | 33549.41  | 231567.9  | 177511.9  | 10950.33  | 58380.89  | 40998.56  | 31460.03  |

|           |           |           |           |           |           |           |           |           |           |
|-----------|-----------|-----------|-----------|-----------|-----------|-----------|-----------|-----------|-----------|
| LN574.995 | LN574.995 | LN574.995 | LN574.994 | LN574.996 | LN577.399 | LN579.066 | LN579.066 | LN579.130 | LN579.130 |
| 36065.57  | 24823.93  | 30985.54  | 27461.45  | 29725.15  | 17487.88  | 38976.17  | 22319.73  | 31237.89  | 21033.97  |
| 37271.44  | 25536.64  | 44513.04  | 33133.46  | 30208.36  | 22382.3   | 42429.85  | 23570.25  | 31486.46  | 22051.49  |
| 37707.15  | 27219.64  | 43836.84  | 25556.38  | 29455.89  | 19759.55  | 36869.09  | 22758.5   | 33512.09  | 19462.11  |
| 37012.56  | 28254.25  | 44299.63  | 27825.22  | 27316.99  | 13260.12  | 35053.41  | 22968.61  | 31890.29  | 20877.91  |
| 40083.4   | 25623.19  | 42424.05  | 27273.57  | 28975.62  | 14356.68  | 36109.02  | 19826.61  | 30756.08  | 19658.29  |

|           |           |           |           |           |           |           |           |           |           |
|-----------|-----------|-----------|-----------|-----------|-----------|-----------|-----------|-----------|-----------|
| LN579.130 | LN579.131 | LN579.226 | LN579.226 | LN579.227 | LN579.226 | LN579.301 | LN579.301 | LN579.536 | LN579.780 |
| 24201.84  | 30946.91  | 27533.86  | 27754.86  | 25662.65  | 32247.49  | 39956.62  | 23892.45  | 16861     | 10228.16  |
| 25751.78  | 29155.36  | 23710.14  | 29801.86  | 24693.63  | 31690.67  | 41165.81  | 26751.56  | 17372.9   | 9841.28   |
| 25770.56  | 26193.44  | 23307.58  | 26951.77  | 25939.75  | 29858.77  | 38003.27  | 23728.78  | 19594.75  | 6614.124  |
| 26791.61  | 28517.62  | 24504.75  | 27776.09  | 23211.73  | 32963.97  | 40538.4   | 24809.05  | 18428.35  | 11693.78  |
| 25558.46  | 27994.76  | 26911.06  | 29410.01  | 28465.63  | 30432.5   | 40883.08  | 22146.17  | 16594.01  | 12228.06  |

|           |           |           |           |           |           |           |           |           |           |
|-----------|-----------|-----------|-----------|-----------|-----------|-----------|-----------|-----------|-----------|
| LN580.339 | LN580.567 | LN580.985 | LN580.985 | LN580.986 | LN580.984 | LN581.004 | LN581.004 | LN581.004 | LN581.140 |
| 69218.36  | 7820.872  | 44466.96  | 53334.18  | 49755.88  | 62274.37  | 49146.77  | 50471.87  | 33453.25  | 30083.36  |
| 69010.28  | 8927.119  | 42507.53  | 52535.21  | 50446.19  | 69120.96  | 28548.71  | 33915.53  | 23549.73  | 44274.59  |
| 64346.87  | 14084.43  | 44672.09  | 58687.88  | 48540.62  | 64855.9   | 43405.76  | 55622.92  | 35004.37  | 66028.41  |
| 59124.83  | 17520.39  | 43399.5   | 56812.53  | 44901.11  | 62659.55  | 46938.42  | 49812.92  | 35158     | 72600.26  |
| 56560.25  | 19272.04  | 45969.04  | 60486.3   | 50897.77  | 75887.17  | 48374.96  | 48191.04  | 34095.74  | 74711.6   |



|           |           |           |           |           |           |           |           |           |           |
|-----------|-----------|-----------|-----------|-----------|-----------|-----------|-----------|-----------|-----------|
| LN581.526 | LN581.526 | LN581.526 | LN581.526 | LN581.527 | LN581.526 | LN581.526 | LN581.526 | LN581.526 | LN581.526 |
| 2353188   | 65375.85  | 65159.33  | 76693.97  | 33298.79  | 65052.31  | 47921.63  | 51422.47  | 67783.11  | 55630.27  |
| 2324095   | 73964.97  | 76901.23  | 55999.41  | 44983.94  | 61108.24  | 60849.71  | 55244.57  | 50216.75  | 66893.23  |
| 2289660   | 95039.34  | 63791.41  | 65153.92  | 35483.73  | 71329.67  | 55773.56  | 51339.24  | 47468.29  | 65311.61  |
| 2202380   | 90752.87  | 63177.49  | 62373.35  | 32018.42  | 68037.09  | 62512.56  | 44999.63  | 50033.27  | 62932.23  |
| 2269575   | 94795.3   | 73167.17  | 59611.39  | 34360.1   | 66024.98  | 54622.7   | 47342.29  | 49655.73  | 64360.91  |

|           |           |           |           |           |           |           |           |           |           |
|-----------|-----------|-----------|-----------|-----------|-----------|-----------|-----------|-----------|-----------|
| LN581.526 | LN581.526 | LN581.526 | LN581.527 | LN581.526 | LN581.526 | LN581.527 | LN581.526 | LN581.527 | LN581.526 |
| 43166.42  | 33801.88  | 50873.26  | 68740.21  | 47789.37  | 37036.88  | 59452.86  | 54293.73  | 53169.37  | 65785.75  |
| 43921.47  | 42544.92  | 73233.59  | 72770.92  | 44821.31  | 35331.95  | 49797.15  | 79231.93  | 45015.81  | 50888.64  |
| 50985.46  | 41029.47  | 67354.6   | 69026.06  | 37098.4   | 38623.75  | 47782.08  | 68007.25  | 46426.09  | 46946.14  |
| 43351.11  | 44359.34  | 65964     | 68937.38  | 36978.92  | 37667.24  | 43228.98  | 56211.8   | 42122.76  | 49131.2   |
| 43258.15  | 38707.82  | 65052.68  | 64084.57  | 35117.29  | 33375.24  | 46845.09  | 58231.22  | 43920.51  | 48787.78  |

|           |           |           |           |           |           |           |           |           |           |
|-----------|-----------|-----------|-----------|-----------|-----------|-----------|-----------|-----------|-----------|
| LN581.526 | LN581.527 | LN581.527 | LN581.526 | LN581.527 | LN581.526 | LN581.527 | LN581.526 | LN581.526 | LN581.526 |
| 55308.3   | 54783.67  | 47613.59  | 69248.11  | 49744.19  | 42953.85  | 48272.79  | 52593.94  | 31883.23  | 31992.97  |
| 38439.68  | 38898.54  | 41027.37  | 62155.24  | 44683.7   | 48937.15  | 40753.14  | 27746.33  | 44820.51  | 37732.4   |
| 37337.44  | 44495.37  | 42889.25  | 61849.98  | 38940.59  | 41163.68  | 43595.69  | 31393.77  | 43893.64  | 35876.78  |
| 37748.27  | 42520.29  | 42338     | 64821.45  | 39008.92  | 41224.53  | 40601.49  | 28957.92  | 46629.12  | 36531.24  |
| 37870.26  | 39197.09  | 34628.88  | 64412.6   | 38654.87  | 44772.09  | 37981.34  | 25189.14  | 42879.35  | 34738.7   |

|           |           |           |           |           |           |           |           |           |           |
|-----------|-----------|-----------|-----------|-----------|-----------|-----------|-----------|-----------|-----------|
| LN581.526 | LN581.526 | LN581.526 | LN581.527 | LN581.526 | LN581.527 | LN581.526 | LN581.527 | LN581.527 | LN581.527 |
| 36094.09  | 77301.02  | 33992.87  | 45005.54  | 44453.27  | 51987.47  | 64839.55  | 29102.04  | 52449.2   | 44176.62  |
| 41823.82  | 60702.64  | 43102.76  | 32320.85  | 47473.48  | 53351.61  | 47273.02  | 42203.34  | 56838.19  | 48405.67  |
| 36980.81  | 59949.08  | 40733.38  | 28033.52  | 46691.88  | 49442.68  | 49952.3   | 45345.97  | 53929.94  | 47686.69  |
| 40321.59  | 58865.74  | 39493.72  | 30759.6   | 43672.11  | 49018.65  | 44920.81  | 40578.48  | 51367.63  | 46091.5   |
| 38517.6   | 59284.62  | 36344.61  | 24933.4   | 41201.92  | 46043.32  | 39326.05  | 43913.27  | 51159.47  | 46732.71  |

|           |           |           |           |           |           |           |           |           |           |
|-----------|-----------|-----------|-----------|-----------|-----------|-----------|-----------|-----------|-----------|
| LN581.527 | LN581.527 | LN581.527 | LN581.526 | LN581.528 | LN582.529 | LN583.062 | LN583.062 | LN583.062 | LN583.062 |
| 55037.98  | 48759.12  | 55516.68  | 39377.2   | 66636.36  | 874838.4  | 25798.17  | 21613.18  | 24389.93  | 29198.02  |
| 52865.63  | 44977.37  | 43412     | 43952.96  | 70309.91  | 822199.3  | 25236.34  | 20967.47  | 27562.96  | 30203.98  |
| 48740.34  | 43398.23  | 42575.41  | 44399.28  | 73497.49  | 832063.1  | 23937.07  | 19969.22  | 29728.74  | 26156.79  |
| 47797.29  | 47151.76  | 45274.04  | 41737.62  | 63106.89  | 847062.8  | 22574.67  | 16921.1   | 31136.14  | 30696.64  |
| 50940.01  | 39964.48  | 43443.29  | 37833.51  | 66263.49  | 817937.7  | 23175.81  | 17900     | 24470.68  | 23674     |

|           |           |           |           |           |           |           |           |           |           |
|-----------|-----------|-----------|-----------|-----------|-----------|-----------|-----------|-----------|-----------|
| LN583.062 | LN583.296 | LN583.532 | LN584.416 | LN584.535 | LN585.056 | LN585.055 | LN585.056 | LN585.056 | LN585.312 |
| 31920.61  | 27907.04  | 177446.8  | 56853.92  | 14903.2   | 21289.15  | 15607.82  | 17939.08  | 20566.01  | 32528.5   |
| 30680.55  | 24600.53  | 175809.3  | 60114.62  | 13317.36  | 18260.05  | 17725.39  | 18082.76  | 21473.2   | 36034.26  |
| 32743.51  | 24690.84  | 165072.6  | 56870.61  | 15247.76  | 22917.42  | 17579     | 18329.86  | 23303.24  | 36476.98  |
| 32598.88  | 27381.48  | 164119.7  | 51333.69  | 15285.43  | 18955.16  | 15448.35  | 17923.59  | 20431.37  | 33033.85  |
| 28592.56  | 25925.48  | 169534.8  | 51775.34  | 14124.86  | 19538.3   | 15883.49  | 17719.05  | 24649.14  | 33667.23  |

|           |           |           |           |           |           |           |           |           |           |
|-----------|-----------|-----------|-----------|-----------|-----------|-----------|-----------|-----------|-----------|
| LN585.312 | LN585.312 | LN585.329 | LN586.691 | LN586.747 | LN587.013 | LN588.691 | LN588.749 | LN588.897 | LN588.897 |
| 25475.55  | 28446.14  | 56278.5   | 28172.33  | 22686.18  | 51324.69  | 20101.7   | 20743.01  | 30713.31  | 61423.7   |
| 17590.16  | 25600.6   | 56189.09  | 27237.25  | 28385.86  | 53591.38  | 22309.83  | 22073.9   | 24092.94  | 63150.67  |
| 23147.17  | 29162.34  | 89866.3   | 28464.51  | 25120.84  | 55393.62  | 21214.71  | 21079.2   | 28432.08  | 74697.44  |
| 20652.59  | 27082.67  | 112038.9  | 32183.09  | 25844.55  | 51286.71  | 23821.78  | 23070.19  | 24738.08  | 59669.14  |
| 22396.43  | 27976.87  | 120060    | 40522.05  | 33740.44  | 54602.4   | 31984.92  | 23191.65  | 24655.41  | 55783.51  |

|           |           |           |           |           |           |           |           |           |           |
|-----------|-----------|-----------|-----------|-----------|-----------|-----------|-----------|-----------|-----------|
| LN588.897 |
| 20784.65  | 60062.67  | 45047.51  | 58569.59  | 22570.04  | 69648.99  | 50332.04  | 64198.93  | 46473.34  | 43003.5   |
| 14401.46  | 52895.89  | 57595.02  | 57008.63  | 26662.61  | 65689.79  | 57974.21  | 65454.9   | 48500.61  | 55995.91  |
| 18102.57  | 51851.02  | 66118.82  | 73627.71  | 28815.01  | 72451.68  | 56145.59  | 79266.17  | 60017.95  | 63439.68  |
| 20883.56  | 50969.97  | 48660.76  | 53486.81  | 25510.71  | 59170.83  | 53411.99  | 63118.45  | 48245.61  | 45834.6   |
| 17920.54  | 47537.46  | 47877.95  | 53236.65  | 22301.26  | 64323     | 55226.59  | 61295.79  | 48566.94  | 43381.56  |



|           |           |           |           |           |           |           |           |           |           |
|-----------|-----------|-----------|-----------|-----------|-----------|-----------|-----------|-----------|-----------|
| LN588.897 |
| 59229.14  | 46852.26  | 51377.53  | 38084.5   | 66025.1   | 77953.56  | 42255.46  | 46921.72  | 45872.08  | 57881.19  |
| 44404.94  | 43206.32  | 34907.82  | 44998.65  | 63889.05  | 74011.37  | 43696.74  | 50491.34  | 53455.09  | 59032.22  |
| 47112.3   | 53782.48  | 45525.08  | 40505.44  | 63138.5   | 55539.46  | 36501.08  | 45252.53  | 54517.54  | 70246.29  |
| 47629.7   | 41460.76  | 32586.74  | 42178.12  | 56730.54  | 70504.42  | 43346.8   | 45036.41  | 54300.99  | 57749.16  |
| 41990.06  | 43023.14  | 31019.35  | 38493.74  | 62972.15  | 76056.11  | 41945.99  | 42899.7   | 47595.73  | 54546.69  |

|           |           |           |           |           |           |           |           |           |           |
|-----------|-----------|-----------|-----------|-----------|-----------|-----------|-----------|-----------|-----------|
| LN588.897 | LN588.897 | LN588.897 | LN588.897 | LN588.898 | LN588.898 | LN588.897 | LN588.897 | LN588.897 | LN588.897 |
| 71326.2   | 54331.64  | 51910.26  | 20037.96  | 31885.34  | 44190.97  | 48272.07  | 77492.74  | 27985.64  | 37386.83  |
| 66713.8   | 48270.53  | 50033.49  | 24194.55  | 28302.38  | 43152.19  | 42606.46  | 78229.86  | 24930.36  | 34790.1   |
| 55790.1   | 51494.91  | 48062.41  | 27088.31  | 27334.24  | 46081.73  | 47461.17  | 72190.97  | 28311.15  | 37814.43  |
| 56903.46  | 57337.2   | 46450.42  | 22796.69  | 29620.89  | 43502.37  | 44530.5   | 73512.06  | 26138.45  | 31782.59  |
| 53939.04  | 48615.8   | 39049.23  | 24424.55  | 27000.61  | 49294.9   | 40233.61  | 69613.54  | 26427.72  | 33584.25  |

|           |           |           |           |           |           |           |           |           |           |
|-----------|-----------|-----------|-----------|-----------|-----------|-----------|-----------|-----------|-----------|
| LN588.897 | LN588.898 | LN588.897 | LN588.897 | LN588.897 | LN588.898 | LN588.897 | LN588.898 | LN588.897 | LN588.897 |
| 46908.19  | 52393.88  | 60147.76  | 73057.94  | 36663.05  | 23099.26  | 32349.92  | 50301.96  | 76420.02  | 23565.63  |
| 33998.39  | 34680.89  | 47649.32  | 64121.82  | 40401.51  | 22303.05  | 31553.55  | 36186.08  | 67089.5   | 24441.5   |
| 46006.11  | 32576.61  | 57905.94  | 76198.39  | 33051.9   | 32037.28  | 31041.08  | 37746.57  | 62235.31  | 27472.69  |
| 42330.85  | 30681.76  | 46689.49  | 66860.3   | 41925.53  | 20700.72  | 29882.89  | 36342.56  | 71010.91  | 22595.6   |
| 34766.06  | 31904.45  | 46780.63  | 70476.24  | 36488.81  | 17242.82  | 25248.97  | 36049.66  | 71703.36  | 21762.92  |

|           |           |           |           |           |           |           |           |           |           |
|-----------|-----------|-----------|-----------|-----------|-----------|-----------|-----------|-----------|-----------|
| LN588.898 | LN588.897 | LN588.897 | LN588.897 | LN588.898 | LN588.898 | LN588.898 | LN588.898 | LN588.992 | LN588.992 |
| 61831.47  | 30579.64  | 22210.84  | 47914.35  | 40893.44  | 56291.86  | 34406.67  | 22456.85  | 36744.56  | 28631.98  |
| 66163.39  | 28256.04  | 20106.07  | 41155.95  | 36603.31  | 51644.03  | 28908.72  | 19794.2   | 36307.95  | 30055.27  |
| 62716.86  | 30128.8   | 22875.52  | 44107.53  | 36914.14  | 50325.59  | 30368.98  | 21206.65  | 32790.68  | 29238.45  |
| 58062.6   | 23052.99  | 19155.33  | 44040.18  | 39634.2   | 50462.64  | 32275.77  | 15781.19  | 36436.55  | 28716.99  |
| 55416.68  | 25887.1   | 18691.77  | 40592.21  | 38429.37  | 46857.16  | 27105.81  | 20390.99  | 35618.6   | 25311.77  |

|           |           |           |           |           |           |           |           |           |           |
|-----------|-----------|-----------|-----------|-----------|-----------|-----------|-----------|-----------|-----------|
| LN588.992 | LN588.992 | LN589.010 | LN589.029 | LN589.029 | LN589.153 | LN589.517 | LN590.155 | LN590.155 | LN590.433 |
| 40065.96  | 24436.16  | 31673.8   | 37281.73  | 25288.15  | 30309.87  | 40040.83  | 17574.88  | 24898.72  | 48653.79  |
| 40844.91  | 27618.59  | 33554.56  | 36076.58  | 28066.13  | 37974.94  | 35680.71  | 16787.31  | 23375.09  | 50435.08  |
| 38989.19  | 26134.43  | 27347.7   | 37280.31  | 21458.1   | 35223.09  | 30158.36  | 16242.91  | 26151.29  | 49513.1   |
| 42065.93  | 27359.73  | 32673.98  | 31723.08  | 24535.84  | 26846.58  | 29464.34  | 17074.02  | 25316.72  | 46236.09  |
| 35690.74  | 24439.03  | 30572.35  | 35847.33  | 22424.91  | 30523.71  | 28318.94  | 15340.32  | 24238.7   | 43686.17  |

|           |           |           |           |           |           |           |           |           |           |
|-----------|-----------|-----------|-----------|-----------|-----------|-----------|-----------|-----------|-----------|
| LN590.987 |
| 23179.55  | 21523.41  | 24349.34  | 26607.11  | 40372.09  | 30728.12  | 27755.95  | 32269.79  | 31213.8   | 29488.44  |
| 27050.66  | 24546.27  | 27200.27  | 26818.15  | 35231.83  | 29930.7   | 27599.71  | 33603.02  | 36581.86  | 30478.6   |
| 25591.38  | 23163.53  | 25520.95  | 25956.81  | 35088.66  | 31597.82  | 28139.04  | 34619.88  | 32304.83  | 28141.24  |
| 26424.89  | 20950.32  | 25809.35  | 27497.81  | 37316.46  | 30834.96  | 26986.75  | 34036.31  | 32903.07  | 30127.94  |
| 25125.86  | 22623.04  | 23070.64  | 28103.45  | 41686.95  | 30632.49  | 28506.74  | 35545.01  | 34128.21  | 28226.43  |

|           |           |           |           |           |           |           |           |           |           |
|-----------|-----------|-----------|-----------|-----------|-----------|-----------|-----------|-----------|-----------|
| LN590.987 | LN590.987 | LN590.987 | LN590.988 | LN590.988 | LN590.988 | LN590.988 | LN590.988 | LN590.988 | LN591.263 |
| 30399.32  | 31944.27  | 21257.68  | 20600.43  | 28313.64  | 34596.21  | 27321.47  | 33849.4   | 21086.65  | 20855.69  |
| 29023.63  | 31603.58  | 23946.88  | 18046.5   | 29420.97  | 35199.11  | 27329.41  | 35905.7   | 21024.52  | 20914.99  |
| 31053.24  | 32745.31  | 23442.25  | 24132.12  | 28184.89  | 34947     | 29065.62  | 31670.27  | 18370.59  | 20288.89  |
| 27366.93  | 28596.86  | 22864.14  | 23271.97  | 27196.13  | 34868.72  | 31946.14  | 35165.14  | 18422.77  | 20772.78  |
| 30688.33  | 32855.76  | 22897.67  | 19502.44  | 28470.7   | 34167.55  | 30799.63  | 37839.94  | 20640.94  | 19898.19  |

|           |           |           |           |           |           |           |           |           |           |
|-----------|-----------|-----------|-----------|-----------|-----------|-----------|-----------|-----------|-----------|
| LN591.263 | LN591.263 | LN591.263 | LN591.263 | LN591.572 | LN592.576 | LN592.764 | LN593.004 | LN593.004 | LN593.004 |
| 20303.6   | 23441.41  | 23198.72  | 17914.84  | 63300.64  | 21780.87  | 33411.51  | 36850.96  | 34782.98  | 33509.12  |
| 19342.96  | 20409.41  | 18102.22  | 18409.71  | 57527.42  | 17523.88  | 33590.54  | 33422.04  | 32048.35  | 36742.51  |
| 17827.01  | 22161.16  | 22095.68  | 19764.08  | 51858.3   | 22349.76  | 30781.47  | 35357.3   | 32465.63  | 35759.51  |
| 20181.04  | 21955.02  | 19496.5   | 17962.91  | 51916.02  | 18570.27  | 29348     | 38749.79  | 35557.89  | 39439.36  |
| 18496.32  | 20251.98  | 21084.69  | 17850.08  | 41654.42  | 18704.23  | 30585.71  | 31437.2   | 34201.06  | 35718.39  |



|           |           |           |           |           |           |           |           |           |           |
|-----------|-----------|-----------|-----------|-----------|-----------|-----------|-----------|-----------|-----------|
| LN593.004 | LN593.003 | LN593.004 | LN593.004 | LN593.022 | LN593.023 | LN593.023 | LN593.023 | LN593.023 | LN593.023 |
| 35649.03  | 22484.11  | 39246.31  | 28042.58  | 30529.93  | 25587.53  | 35229.8   | 39250.07  | 43589.08  | 27644.23  |
| 34563.07  | 25089.76  | 37276.9   | 32844.95  | 31652.57  | 25016.3   | 35820.82  | 39476.83  | 46140.05  | 25040.83  |
| 35195.19  | 26431.09  | 37640.25  | 28212.96  | 31017.09  | 24606.85  | 35164.92  | 41815.22  | 42815.21  | 29456.62  |
| 38515.95  | 25661.76  | 38011.09  | 29309.29  | 34836.74  | 28041.67  | 38872.66  | 39989.69  | 47660.68  | 29032.95  |
| 37755.25  | 23535.08  | 33453.67  | 30541.95  | 29096.67  | 25363.27  | 34069.9   | 37094.28  | 45309.04  | 28136.71  |

|           |           |           |           |           |           |           |           |           |           |
|-----------|-----------|-----------|-----------|-----------|-----------|-----------|-----------|-----------|-----------|
| LN593.123 | LN594.766 | LN595.000 | LN595.001 | LN595.001 | LN595.020 | LN595.039 | LN595.040 | LN595.040 | LN595.040 |
| 14327.82  | 11782.26  | 43752.45  | 43492.7   | 44360.14  | 37544.79  | 26702.59  | 40038.62  | 25869.84  | 37528.08  |
| 15288     | 11276.46  | 37175.5   | 43221.98  | 46797.54  | 37183.68  | 32102.32  | 39588.53  | 27995.93  | 40589.31  |
| 17893.59  | 10188.54  | 38572.45  | 42544.94  | 46480.8   | 35978.56  | 30637.52  | 42994.98  | 26866.04  | 36452.65  |
| 20256.27  | 12852.82  | 41398.47  | 44770.94  | 49417.12  | 36135.73  | 30448.23  | 43063.22  | 27337.16  | 36807.93  |
| 18839.89  | 14691.25  | 43515.4   | 43843.58  | 44411.82  | 38657.71  | 25889.38  | 40612.73  | 28228.46  | 37355.1   |

|           |           |           |           |           |           |           |           |           |           |
|-----------|-----------|-----------|-----------|-----------|-----------|-----------|-----------|-----------|-----------|
| LN595.041 | LN595.119 | LN595.170 | LN595.425 | LN596.770 | LN597.055 | LN597.056 | LN597.056 | LN597.056 | LN597.312 |
| 42075.66  | 9916.473  | 34692.63  | 19912.68  | 24746.43  | 58026.9   | 43232.84  | 67283.97  | 60542.31  | 24138.93  |
| 39378.39  | 10268.25  | 28914.24  | 21118.45  | 22222.98  | 56325.41  | 36750.81  | 70071.19  | 59237.85  | 22463.88  |
| 37115.23  | 11171.4   | 36765.6   | 23074.78  | 23443.67  | 51661.19  | 47099.79  | 71243.44  | 47662.64  | 22518.99  |
| 42380.92  | 9190.437  | 28686.98  | 14841.65  | 29935.71  | 54180.04  | 41221.82  | 74609.05  | 54109.76  | 24650.11  |
| 42027.55  | 10159.77  | 31052.27  | 14663.38  | 28924.43  | 54853.91  | 45643.91  | 60780.16  | 50636.26  | 29224.3   |

|           |           |           |           |           |           |           |           |           |           |
|-----------|-----------|-----------|-----------|-----------|-----------|-----------|-----------|-----------|-----------|
| LN597.311 | LN598.516 | LN598.770 | LN599.073 | LN599.519 | LN599.529 | LN599.716 | LN600.389 | LN600.522 | LN600.532 |
| 20931.37  | 562594.7  | 13229.66  | 30119.15  | 193971    | 701719    | 40327.04  | 37065.08  | 29828.34  | 260077.4  |
| 20551.73  | 564310.2  | 8480.011  | 31077.25  | 199792.7  | 697212.8  | 36785.35  | 41571.94  | 31001.49  | 272199.5  |
| 18484.24  | 514886.5  | 12318.79  | 29359.83  | 181301.2  | 734140.1  | 39178.91  | 37426.08  | 24918.83  | 280702.5  |
| 20554.04  | 526430.9  | 14392.36  | 33015.37  | 185995.9  | 738972.6  | 46770.6   | 35068.19  | 28423.64  | 301658.8  |
| 19032.9   | 505702.5  | 16526.19  | 28267.79  | 192810.7  | 769602.8  | 59166.89  | 30455.89  | 16808.11  | 214789.1  |

|           |           |           |           |           |           |           |           |           |           |
|-----------|-----------|-----------|-----------|-----------|-----------|-----------|-----------|-----------|-----------|
| LN600.723 | LN600.992 | LN600.991 | LN600.990 | LN601.010 | LN601.010 | LN601.010 | LN601.009 | LN601.010 | LN601.010 |
| 19243.23  | 71154.91  | 68750.39  | 62141.82  | 63278.5   | 74484.67  | 62894.53  | 64790.77  | 71467.01  | 55620.37  |
| 19136.95  | 76947.89  | 69404.23  | 57529.35  | 72994.86  | 70846.05  | 33892.55  | 65959.48  | 38661.75  | 51821.37  |
| 18889.67  | 72199.61  | 75725.87  | 63120.53  | 64346.66  | 72755.54  | 58523.94  | 64827.37  | 64638.15  | 49170.13  |
| 26021.68  | 74650.25  | 69991.63  | 62135.37  | 65579.73  | 72445.52  | 61946.48  | 64670.54  | 65456.94  | 50616.98  |
| 34544.22  | 76332.61  | 67983.71  | 62227.44  | 54060.11  | 71509.12  | 64917.79  | 66429.28  | 68356.08  | 51463.3   |

| LN601.010 | LN601.172 | LN601.171 | LN601.172 | LN601.171 | LN601.307 | LN601.307 | LN601.307 | LN601.306 | LN601.306 |
|-----------|-----------|-----------|-----------|-----------|-----------|-----------|-----------|-----------|-----------|
| 52461.73  | 25182.31  | 25191.01  | 27513     | 23583.97  | 33890.79  | 26516.85  | 27436.56  | 19728.39  | 26131.4   |
| 55697.65  | 26729.01  | 28309.84  | 23376.42  | 24168.82  | 35106.33  | 28472.07  | 29286.64  | 21006.93  | 29060.7   |
| 56500.83  | 25341.3   | 27298.27  | 26197.44  | 24104.93  | 34818.36  | 22795.32  | 29432.73  | 20981.39  | 26156.71  |
| 49408.25  | 22602.93  | 27598.79  | 26568.84  | 22429.45  | 35917.7   | 30053.98  | 27637.44  | 18042.31  | 23702.43  |
| 45801     | 30113.66  | 27269.51  | 26125.08  | 23655     | 36979.03  | 22791.36  | 28947.21  | 22826.02  | 24246.66  |

|           |           |           |           |           |           |           |           |           |           |
|-----------|-----------|-----------|-----------|-----------|-----------|-----------|-----------|-----------|-----------|
| LN601.443 | LN601.525 | LN601.719 | LN602.529 | LN602.719 | LN602.769 | LN602.791 | LN602.988 | LN602.988 | LN602.988 |
| 37747.93  | 209628.4  | 22572.53  | 73196.3   | 78059.42  | 28887.7   | 23560.86  | 32751.26  | 47632.04  | 33045.95  |
| 38222.27  | 198910.4  | 22906.27  | 78660.46  | 66572.14  | 30746.46  | 33460.84  | 29677.95  | 48648.35  | 31982.75  |
| 41465.14  | 190548.8  | 24223.49  | 78395.3   | 76017.27  | 30087.55  | 29270.87  | 33704.06  | 36601.83  | 31336.16  |
| 26728.55  | 204318.2  | 30483.74  | 49210.39  | 86775.62  | 33244.62  | 26304.24  | 32128.51  | 40587.74  | 33208.04  |
| 33200.58  | 211857.4  | 34505.57  | 81087.29  | 126219.1  | 35773.93  | 33064.22  | 32673.3   | 43283.96  | 27969.08  |

|           |           |           |           |           |           |           |           |           |           |
|-----------|-----------|-----------|-----------|-----------|-----------|-----------|-----------|-----------|-----------|
| LN603.007 | LN603.007 | LN603.007 | LN603.007 | LN603.007 | LN603.007 | LN603.046 | LN603.476 | LN603.722 | LN604.479 |
| 44516.85  | 35954.45  | 32784.39  | 32722.56  | 50912.96  | 29339.39  | 31220.49  | 140678.7  | 20017.1   | 51062.01  |
| 38829.14  | 31719.44  | 32168.74  | 36103.31  | 47578.87  | 27942.14  | 31232.24  | 138069.6  | 12173.97  | 53976.8   |
| 35751.31  | 31945.46  | 35489.62  | 39592.85  | 39976.3   | 30796.65  | 33399.42  | 137002.9  | 18207.38  | 40327.07  |
| 38041.26  | 35471.69  | 31431.45  | 41313.17  | 47412.59  | 28074.06  | 28985.78  | 154589.9  | 20625.23  | 42964.74  |
| 35815.62  | 32197.26  | 32059.75  | 35319.83  | 42853.46  | 29168.4   | 31022.56  | 160242.8  | 22093.15  | 56884.29  |



|           |           |           |           |           |           |           |           |           |           |
|-----------|-----------|-----------|-----------|-----------|-----------|-----------|-----------|-----------|-----------|
| LN604.719 | LN605.125 | LN605.165 | LN605.165 | LN605.164 | LN605.164 | LN605.164 | LN605.473 | LN606.476 | LN606.716 |
| 36305.97  | 35169.6   | 24680.73  | 21528.2   | 54755.08  | 48508.74  | 49577.95  | 40130.26  | 7638.904  | 17433.22  |
| 37115.66  | 31857.48  | 25314.21  | 20503.61  | 52172.09  | 45031.69  | 52924.85  | 43845.8   | 11964.05  | 14210.83  |
| 39111.84  | 31451.03  | 30756.04  | 21743.05  | 52102.46  | 47751.24  | 51433.34  | 43362.25  | 9171.535  | 17306.16  |
| 40986.19  | 31752.53  | 22206.86  | 20808.51  | 57459.35  | 47822.71  | 51688.27  | 32946.08  | 12454.67  | 19517.27  |
| 53245.57  | 28522.84  | 25261.75  | 18887.69  | 52625.88  | 47116.19  | 50648.85  | 47576.85  | 10974.8   | 21179.14  |

|           |           |           |           |           |           |           |           |           |           |
|-----------|-----------|-----------|-----------|-----------|-----------|-----------|-----------|-----------|-----------|
| LN607.002 | LN607.001 | LN607.001 | LN607.020 | LN607.020 | LN607.021 | LN607.020 | LN607.021 | LN607.020 | LN607.100 |
| 27146.45  | 42767.3   | 34586.71  | 41492.71  | 27092.61  | 38041.49  | 27827.17  | 31830.4   | 26223.09  | 27030.44  |
| 27782.65  | 45179.07  | 39135.13  | 31765.46  | 27343.76  | 41009.21  | 28236.71  | 29227.65  | 25499.33  | 25316.55  |
| 28620.2   | 44160.93  | 31805.65  | 42138.78  | 25995.77  | 36880.39  | 26017.95  | 31048.86  | 26725.16  | 25405.47  |
| 29979.37  | 46538.55  | 33969.85  | 42000.73  | 23557.09  | 43151.23  | 28908.95  | 35929.22  | 29430.33  | 24437.72  |
| 30150.88  | 44568.64  | 30831.55  | 40283.58  | 24681.41  | 42394.72  | 29089.94  | 31758.47  | 26284.77  | 24255.74  |

|           |           |           |           |           |           |           |           |           |           |           |
|-----------|-----------|-----------|-----------|-----------|-----------|-----------|-----------|-----------|-----------|-----------|
| LN607.100 | LN607.156 | LN607.257 | LN607.258 | LN607.258 |
| 17323.07  | 27806.56  | 36486.51  | 19009.59  | 24266.99  | 36795.28  | 19174.46  | 19351.81  | 19706.23  | 21375.51  |           |
| 21150.51  | 31971.25  | 33431.96  | 18806.06  | 23416.8   | 35703.85  | 21814.46  | 18088.9   | 18301.91  | 19809.47  |           |
| 21841.06  | 29091.99  | 34661.19  | 21044.76  | 22985.58  | 33448.52  | 18265.46  | 19485.97  | 21257.5   | 19926.39  |           |
| 21842.37  | 25432.34  | 43693.63  | 19828.34  | 23350.54  | 33986.76  | 15827.61  | 17678.27  | 18394.3   | 17990.03  |           |
| 19623.84  | 29569.63  | 33404.31  | 20352.25  | 26310.71  | 33088.25  | 15922.83  | 18427.36  | 18243.86  | 20300.15  |           |

|           |           |           |           |           |           |           |           |           |           |
|-----------|-----------|-----------|-----------|-----------|-----------|-----------|-----------|-----------|-----------|
| LN607.258 | LN607.720 | LN608.737 | LN609.017 |
| 20534.44  | 28874.1   | 19603.37  | 15144.81  | 31975.57  | 26587.74  | 31742.23  | 24273.97  | 13404.37  | 27147.65  |
| 19769.92  | 28232.12  | 21922.38  | 19192.46  | 30868.28  | 29181.43  | 29258.71  | 25378.83  | 15781.3   | 28887.1   |
| 18440.14  | 28283.48  | 21400.67  | 16984.73  | 32987     | 27034.57  | 30576.47  | 21162.31  | 15207.29  | 29493.22  |
| 20452.23  | 31236.32  | 22678.34  | 18816.54  | 29631.33  | 28666.96  | 34078.73  | 26691.39  | 17375.89  | 27966.15  |
| 18541.97  | 27656.41  | 24236.81  | 16230.32  | 30227.8   | 23486.33  | 28825.38  | 27015.61  | 17972.46  | 27518.61  |

|           |           |           |           |           |           |           |           |           |           |
|-----------|-----------|-----------|-----------|-----------|-----------|-----------|-----------|-----------|-----------|
| LN609.017 | LN609.018 | LN609.018 | LN609.018 | LN609.018 | LN609.510 | LN609.557 | LN609.558 | LN609.557 | LN609.558 |
| 23216.33  | 27760.12  | 26141.82  | 31214.96  | 26885.46  | 15387.52  | 1949130   | 58272.52  | 45833     | 67106.85  |
| 27006.98  | 28087.97  | 26884.47  | 33364.22  | 28852.39  | 20881.26  | 1995284   | 38372.36  | 46545.71  | 70408.98  |
| 25216.84  | 23878.62  | 24603.44  | 28617.38  | 33444.05  | 20600.03  | 1996583   | 52488.23  | 59830.71  | 97357.14  |
| 28983.06  | 24232.43  | 24148.92  | 26685.47  | 31601.52  | 20035.56  | 1974235   | 60743.79  | 47648.89  | 58046.66  |
| 23688.96  | 22853.84  | 24509.32  | 30499.38  | 29579.52  | 16388.46  | 2023633   | 53615.01  | 40628     | 65843.2   |

|           |           |           |           |           |           |           |           |           |           |
|-----------|-----------|-----------|-----------|-----------|-----------|-----------|-----------|-----------|-----------|
| LN609.558 | LN609.557 | LN609.558 | LN609.558 |
| 32207.46  | 55513.68  | 57384.48  | 57344.22  | 36885.91  | 51669.41  | 44150.73  | 33338.38  | 93400.27  | 38247.88  |
| 35599.34  | 57627.04  | 56257.4   | 52212.99  | 41456.14  | 64583.84  | 42215.22  | 38482.44  | 99774.89  | 38529.73  |
| 28315.97  | 60448.69  | 61387.14  | 54908.6   | 40058.39  | 47553.83  | 43205.86  | 30134.29  | 95197.63  | 34621.33  |
| 27078.88  | 64779.38  | 46181.46  | 60090.89  | 33765.79  | 47959.05  | 47117.61  | 38555.87  | 81483.38  | 37019.87  |
| 46956.24  | 50226     | 56832.38  | 49099.74  | 38594.45  | 40827.92  | 39351.59  | 35427.31  | 92566.06  | 42397.63  |

|           |           |           |           |           |           |           |           |           |           |
|-----------|-----------|-----------|-----------|-----------|-----------|-----------|-----------|-----------|-----------|
| LN609.558 |
| 40932.14  | 37523.31  | 81437.19  | 37210.26  | 30201.38  | 37379.72  | 30192.26  | 43201.41  | 38261.57  | 34401.55  |
| 41509.76  | 38432.33  | 87458.29  | 38898.65  | 30264.77  | 39932.26  | 32453.38  | 41315.9   | 39611.5   | 35254.32  |
| 38903.55  | 34491.33  | 86540.54  | 38335.36  | 30720.31  | 38667.49  | 36219.22  | 57492.55  | 43704.01  | 33313.32  |
| 46860.26  | 51529.93  | 78029.51  | 74137.95  | 39607.51  | 52029.33  | 37856.05  | 51790.89  | 30856.56  | 31637.26  |
| 33630.3   | 33283.17  | 79813.54  | 55473.44  | 37523.93  | 46403.7   | 31339.01  | 32161.41  | 30369.5   | 33272.76  |

|           |           |           |           |           |           |           |           |           |           |
|-----------|-----------|-----------|-----------|-----------|-----------|-----------|-----------|-----------|-----------|
| LN609.558 | LN609.558 | LN609.558 | LN609.557 | LN609.557 | LN609.558 | LN609.558 | LN609.558 | LN609.557 | LN609.558 |
| 38235.2   | 42039.56  | 50314.86  | 32652.69  | 62223.57  | 43590.54  | 35277.36  | 45340.39  | 43882.53  | 55538.87  |
| 40119.22  | 43137.98  | 47635.65  | 32337.46  | 62610.68  | 40591.23  | 38647.26  | 46647.14  | 40069.44  | 58712.65  |
| 34011.97  | 40426.73  | 43492.65  | 33391.27  | 66608.37  | 38554.94  | 37730.21  | 46876.69  | 41678.7   | 55776.78  |
| 30859.87  | 48671.93  | 61869.95  | 44634.54  | 63176.59  | 36331.32  | 45570.41  | 35099.79  | 44578.96  | 53836.96  |
| 34877.33  | 36708.71  | 41918.75  | 33665     | 69836.68  | 41926.18  | 36038.31  | 44264.45  | 39313.08  | 42544.26  |



|           |           |           |           |           |           |           |           |           |           |
|-----------|-----------|-----------|-----------|-----------|-----------|-----------|-----------|-----------|-----------|
| LN609.558 | LN609.558 | LN609.558 | LN609.720 | LN610.167 | LN610.561 | LN611.012 | LN611.014 | LN611.014 | LN611.014 |
| 30636.29  | 41116.57  | 39516.17  | 16718.56  | 14518.18  | 867128.5  | 21854.24  | 32879.25  | 37218.12  | 24526.85  |
| 35306.46  | 39851.83  | 39929.65  | 12991.57  | 15438.06  | 824397.5  | 24063.75  | 34694.24  | 33810.14  | 20948.91  |
| 33315.09  | 39864.3   | 40695.17  | 16334.75  | 15517.59  | 858974    | 21173.81  | 34750.99  | 34878.74  | 24837.65  |
| 34758.17  | 39588.58  | 40078.14  | 13832.43  | 17553.17  | 871751.7  | 24386.71  | 33356.99  | 38382.45  | 23633.87  |
| 34662.12  | 45047.08  | 39740.74  | 18156.88  | 14903.22  | 863129.9  | 20556.55  | 32708.41  | 38624.4   | 26885.59  |

|           |           |           |           |           |           |           |           |           |           |
|-----------|-----------|-----------|-----------|-----------|-----------|-----------|-----------|-----------|-----------|
| LN611.014 | LN611.014 | LN611.014 | LN611.013 | LN611.014 | LN611.033 | LN611.033 | LN611.033 | LN611.033 | LN611.291 |
| 32564.24  | 25205.74  | 24384.94  | 28732.8   | 28551.13  | 31251.27  | 25607.75  | 35392.95  | 23760.06  | 14774.37  |
| 29936.65  | 26296.65  | 24903.81  | 29810.42  | 25049.25  | 28399.23  | 23292.38  | 34761.24  | 22046.17  | 15156.89  |
| 29712.41  | 27094.97  | 27037.86  | 27496.95  | 28022.33  | 27837.4   | 24617.68  | 37049.42  | 23534.64  | 10500.12  |
| 28994.75  | 27981.07  | 25458.66  | 33287.65  | 27112.55  | 29720.65  | 27173.06  | 37502.64  | 27201.22  | 14028.87  |
| 34431.18  | 23418.63  | 29609.59  | 30574.37  | 28006.6   | 30036.05  | 23457.21  | 38360.78  | 25029.07  | 13817.91  |

|           |           |           |           |           |           |           |           |           |           |
|-----------|-----------|-----------|-----------|-----------|-----------|-----------|-----------|-----------|-----------|
| LN611.398 | LN611.564 | LN611.717 | LN612.567 | LN612.746 | LN613.012 | LN613.031 | LN613.031 | LN613.031 | LN613.505 |
| 15203.92  | 174398.9  | 29965.96  | 21163.12  | 83753.52  | 33992.21  | 40529.78  | 28092.13  | 32349.52  | 108114    |
| 12695.88  | 176043.2  | 24433.36  | 20504.86  | 77759.67  | 35448.87  | 36873.35  | 30678.61  | 33270.66  | 107382    |
| 14704.6   | 179624.6  | 23655.22  | 17891.61  | 82992.35  | 32607.83  | 38275.36  | 28254.7   | 37329.72  | 63604.36  |
| 11240.81  | 183040.8  | 25397.84  | 17923.95  | 101390.3  | 36557.22  | 36909.47  | 27278.57  | 35259.66  | 124909.2  |
| 12941.72  | 192352.9  | 44221.22  | 17668.26  | 107652.5  | 34346.42  | 40053.13  | 33440.5   | 38863.43  | 77454.91  |

|           |           |           |           |           |           |           |           |           |           |
|-----------|-----------|-----------|-----------|-----------|-----------|-----------|-----------|-----------|-----------|
| LN613.717 | LN613.750 | LN614.508 | LN614.747 | LN615.047 | LN615.046 | LN615.047 | LN615.046 | LN615.046 | LN615.047 |
| 18984.1   | 19072.14  | 37758.27  | 37793.69  | 36414.01  | 36733.89  | 36777.19  | 29178.28  | 20563.73  | 31625.59  |
| 17458.77  | 16485.25  | 32938.41  | 32711.34  | 40868.68  | 38896.51  | 36713.01  | 32455.96  | 21513.87  | 32267.7   |
| 14070.76  | 15583.05  | 31278.89  | 29536.26  | 35261.78  | 41573.99  | 34936.86  | 33621.84  | 21932.39  | 34857.94  |
| 20898.22  | 19023.79  | 32943.48  | 36088.37  | 35977.47  | 38707.13  | 37713.25  | 32289.81  | 24165.9   | 35241.51  |
| 15608.02  | 25880.04  | 28858.73  | 50918.01  | 39757.41  | 39809.83  | 31218.37  | 28130.19  | 23614.17  | 32816.39  |

|           |           |           |           |           |           |           |           |           |           |
|-----------|-----------|-----------|-----------|-----------|-----------|-----------|-----------|-----------|-----------|
| LN615.045 | LN615.047 | LN615.047 | LN615.047 | LN615.047 | LN615.047 | LN615.047 | LN615.046 | LN615.047 | LN615.048 |
| 29091.96  | 42884.19  | 36992.39  | 37414.22  | 29580.96  | 31767.04  | 42819.47  | 48625.38  | 46189.36  | 38630.98  |
| 32444.09  | 40799.56  | 36656.59  | 35326.64  | 30871.98  | 32016.66  | 41268.17  | 49199.15  | 44488.91  | 39494.12  |
| 33172.4   | 41902.13  | 35608.32  | 38946.56  | 29549.07  | 32071.08  | 43487.38  | 45876.3   | 50806.64  | 34120.05  |
| 34016.69  | 43764.43  | 39095.92  | 42140.75  | 27116.37  | 30115.92  | 41992.8   | 48561.12  | 48046.18  | 39522.96  |
| 33360.43  | 42247.25  | 34169.56  | 40286.01  | 30629.91  | 33212.57  | 38073.42  | 45161.43  | 46512.99  | 41353.89  |

|           |           |           |           |           |           |           |           |           |           |
|-----------|-----------|-----------|-----------|-----------|-----------|-----------|-----------|-----------|-----------|
| LN615.711 | LN616.768 | LN617.004 | LN617.004 | LN617.004 | LN617.004 | LN617.003 | LN617.004 | LN617.003 | LN617.003 |
| 17756.76  | 27022.91  | 25570.84  | 33790.64  | 45538.65  | 43521.29  | 43159.86  | 45074.46  | 36052.72  | 40711.37  |
| 17931.37  | 21387.66  | 22493.3   | 36836.04  | 43660.45  | 45720.87  | 44864.25  | 48659.44  | 41329.47  | 40438.65  |
| 18003.42  | 28961.3   | 23110.6   | 40613.54  | 48080.65  | 43539.83  | 41402.05  | 45203.64  | 41666.27  | 47129.85  |
| 13448.92  | 30617.43  | 25174.51  | 34747.96  | 43245.22  | 44631.57  | 41715.19  | 45923.28  | 36498.46  | 47674.4   |
| 15651.53  | 36300.92  | 25255.41  | 36571.61  | 43203.8   | 41270.19  | 42818.56  | 47667.3   | 35543.17  | 42365.93  |

|           |           |           |           |           |           |           |           |           |           |
|-----------|-----------|-----------|-----------|-----------|-----------|-----------|-----------|-----------|-----------|
| LN617.003 | LN617.004 | LN617.003 | LN617.024 | LN617.024 | LN617.024 | LN617.024 | LN617.024 | LN617.025 | LN617.184 |
| 45149.11  | 37540.39  | 54404.34  | 32809.01  | 52479.81  | 43864.54  | 42138.18  | 52166.84  | 44717.82  | 53239.19  |
| 46272.3   | 40959.47  | 43168.62  | 30715.73  | 53755.52  | 44002.25  | 40999.57  | 46586.44  | 44195.34  | 57979.85  |
| 43037.14  | 32815.05  | 51806.53  | 31222.06  | 50470.49  | 49043.14  | 40269.92  | 51137.38  | 46057.01  | 50652.04  |
| 43240.46  | 40901.01  | 50845.15  | 32497.88  | 51100.12  | 45768.17  | 44745.04  | 50116.46  | 46579.8   | 49814.62  |
| 43064.1   | 32050.25  | 50151.68  | 31728.09  | 46776.78  | 50247.9   | 41605.01  | 48969.3   | 45106.89  | 55838.64  |

|           |           |           |           |           |           |           |           |           |           |
|-----------|-----------|-----------|-----------|-----------|-----------|-----------|-----------|-----------|-----------|
| LN617.767 | LN618.690 | LN618.763 | LN619.020 | LN619.765 | LN620.689 | LN620.764 | LN621.037 | LN621.037 | LN621.036 |
| 15870.75  | 36614.97  | 175780.2  | 71133.07  | 32314.46  | 25899.84  | 84759.55  | 25324.89  | 32247.3   | 22812.41  |
| 18730.43  | 33311.06  | 143614    | 72471.23  | 31051.06  | 26491.16  | 59119.26  | 26123.85  | 34273.15  | 25148.14  |
| 15944.51  | 38447.55  | 183265.7  | 74767.14  | 29216.58  | 29624.16  | 79271.17  | 23674.76  | 34251.39  | 24043.39  |
| 15004.98  | 46750.88  | 225150.4  | 78127.32  | 34057.55  | 33874.61  | 82249.63  | 27350.04  | 31287.83  | 24786.69  |
| 20987.81  | 63783.75  | 217760.8  | 72951.76  | 39791.05  | 39696.88  | 80210.95  | 29136.04  | 34221.4   | 24953.78  |



|           |           |           |           |           |           |           |           |           |           |
|-----------|-----------|-----------|-----------|-----------|-----------|-----------|-----------|-----------|-----------|
| LN621.037 | LN621.115 | LN621.306 | LN621.583 | LN621.766 | LN622.707 | LN622.761 | LN622.993 | LN622.993 | LN622.994 |
| 28783.09  | 29680.7   | 15473.17  | 16051.73  | 13292.66  | 84074.46  | 31549.63  | 29913.93  | 35153.12  | 30677.99  |
| 27913.92  | 34623.89  | 18020.91  | 17588.24  | 10306.76  | 74348.05  | 30320.06  | 33246.3   | 34250.44  | 31597.79  |
| 24813.68  | 38543.71  | 25210.11  | 15388.8   | 13431.23  | 78695.5   | 29010.98  | 29494.51  | 38069.58  | 32663.28  |
| 26139.1   | 33531.22  | 29905.42  | 12699.15  | 12759.88  | 101297.5  | 33632.26  | 29219.61  | 34674.29  | 34115.3   |
| 28121.77  | 30811.83  | 33520.15  | 16068.98  | 14891.49  | 124174.1  | 39725.25  | 29948.74  | 32694.29  | 33426.26  |

|           |           |           |           |           |           |           |           |           |           |
|-----------|-----------|-----------|-----------|-----------|-----------|-----------|-----------|-----------|-----------|
| LN622.993 | LN622.993 | LN622.993 | LN622.993 | LN622.993 | LN622.993 | LN623.128 | LN623.201 | LN623.253 | LN623.253 |
| 23584.74  | 26520.88  | 48455.05  | 42050.63  | 54632.57  | 28882.97  | 21261.21  | 32109.61  | 18708.78  | 21331.97  |
| 24074.87  | 30853.51  | 48909.26  | 47257.03  | 53648.63  | 33186.48  | 18504.96  | 36820.99  | 20047.93  | 21302.42  |
| 19663.51  | 28880.76  | 45601.39  | 38826.47  | 54925.59  | 29363.13  | 20219.64  | 33562.86  | 19311.94  | 22543.63  |
| 22226.48  | 25655.32  | 48229.57  | 42945.33  | 52785.04  | 28046.95  | 22414.41  | 25894.76  | 19414.37  | 22797.79  |
| 22909.8   | 25407.6   | 49223.99  | 40455.29  | 50821.31  | 28383.07  | 25240.53  | 39101.66  | 18538.79  | 21654.6   |

|           |           |           |           |           |           |           |           |           |           |
|-----------|-----------|-----------|-----------|-----------|-----------|-----------|-----------|-----------|-----------|
| LN623.252 | LN623.253 | LN623.253 | LN623.254 | LN623.710 | LN624.706 | LN625.009 | LN625.01_ | LN625.010 | LN626.547 |
| 28292.24  | 32225.75  | 21106.72  | 29822.84  | 12267.3   | 26736.61  | 26561.84  | 35463.71  | 23809.17  | 574531.7  |
| 26204.96  | 29510.36  | 18748.92  | 30040.57  | 11436.48  | 24274.7   | 26909.26  | 39255.31  | 24125.89  | 568089.4  |
| 26152.51  | 30475.42  | 18577.62  | 27761.31  | 15792.56  | 25068.74  | 24568.69  | 40678.44  | 24011.2   | 536736.6  |
| 27081.27  | 33060.45  | 21192.01  | 32179.69  | 17343.43  | 32588.98  | 25530.84  | 36142.72  | 25196.64  | 583685    |
| 25207.59  | 29865.12  | 17421.26  | 26969.41  | 22811.11  | 37511.28  | 33487.16  | 37858.6   | 19451.42  | 575737.5  |

|           |           |           |           |           |           |           |           |           |           |
|-----------|-----------|-----------|-----------|-----------|-----------|-----------|-----------|-----------|-----------|
| LN626.723 | LN627.006 | LN627.006 | LN627.006 | LN627.006 | LN627.008 | LN627.026 | LN627.046 | LN627.047 | LN627.047 |
| 126012.4  | 30352.48  | 22277.53  | 33236.25  | 35192.96  | 28366.09  | 19536.19  | 23771.24  | 33348.15  | 28351.01  |
| 104866.5  | 31256.74  | 23360.13  | 33764.46  | 34917.83  | 27770.56  | 16693.01  | 24394.4   | 32833.98  | 30342.36  |
| 110685.4  | 30319.39  | 21294.15  | 33182.28  | 35227.95  | 28755.29  | 20522.23  | 23584.52  | 31168.57  | 25104.39  |
| 127629.9  | 31730.78  | 20952.99  | 32922.26  | 32978.28  | 30105.51  | 18936.17  | 23024.63  | 32077.69  | 25633.29  |
| 173360.4  | 33386.31  | 22544.11  | 34720.68  | 35096.28  | 31135.34  | 18981.66  | 25227.43  | 35257.88  | 29447.56  |

|           |           |           |           |           |           |           |           |           |           |           |
|-----------|-----------|-----------|-----------|-----------|-----------|-----------|-----------|-----------|-----------|-----------|
| LN627.047 | LN627.047 | LN627.106 | LN627.551 | LN627.560 |
| 28617.27  | 33377.61  | 31523.35  | 35365.38  | 30798.57  | 30567.97  | 32853.54  | 22050.46  | 233337.6  | 207644.6  |           |
| 29236.6   | 32196.16  | 37583     | 30828.89  | 31857.43  | 31275.74  | 34767.01  | 24198.18  | 226052.7  | 219946.2  |           |
| 29318.47  | 32529.25  | 29478.75  | 35329.18  | 36568.97  | 34040.99  | 34490.16  | 27066.1   | 228887.3  | 255339.4  |           |
| 28698.49  | 35322.39  | 33098.76  | 34940.37  | 33840.26  | 29442.4   | 35087.12  | 24674.43  | 212816.4  | 179906.3  |           |
| 28127.77  | 30149     | 30421.13  | 33015.47  | 33875.13  | 29027.09  | 34919.9   | 23273.82  | 145938.4  | 169502    |           |

|           |           |           |           |           |           |           |           |           |           |
|-----------|-----------|-----------|-----------|-----------|-----------|-----------|-----------|-----------|-----------|
| LN628.554 | LN628.563 | LN628.719 | LN629.024 | LN629.023 | LN629.023 | LN629.042 | LN629.042 | LN629.043 | LN629.557 |
| 40237.27  | 80534.57  | 555804.8  | 34186.67  | 41071.15  | 31591.93  | 33394.74  | 37026.78  | 37564.39  | 58880.96  |
| 43099.2   | 79608.32  | 412171.2  | 35486.15  | 44679.38  | 29496.32  | 33314.25  | 38914.53  | 40013.35  | 55655.17  |
| 42552.12  | 90991.64  | 477411.6  | 38106.21  | 43808     | 26204.76  | 32563.77  | 39016.1   | 42893.57  | 34227.18  |
| 38657.49  | 55016.8   | 579089.3  | 34791.88  | 43208.19  | 28699.73  | 33683.68  | 36946.28  | 36568.95  | 39619.56  |
| 35293.2   | 67044.96  | 758816.3  | 35594.9   | 40002.56  | 30345.02  | 30806.09  | 42085.2   | 36507     | 62719.12  |

|           |           |           |           |           |           |           |           |           |           |
|-----------|-----------|-----------|-----------|-----------|-----------|-----------|-----------|-----------|-----------|
| LN630.495 | LN630.561 | LN630.719 | LN631.021 | LN631.020 | LN631.021 | LN631.021 | LN631.020 | LN631.020 | LN631.040 |
| 48306.02  | 17406.29  | 310107.7  | 40117.52  | 40133.72  | 58064.92  | 28204.05  | 51144.39  | 38695.76  | 43342.3   |
| 56799.86  | 14209.19  | 261373.4  | 40067.7   | 37468.44  | 60363.98  | 29042.83  | 53644.65  | 42164.62  | 38444.7   |
| 61800.39  | 20907.15  | 290030.3  | 40157.67  | 41024.74  | 60247.51  | 32057     | 54294.68  | 37386.34  | 42393.89  |
| 63956.86  | 15528.18  | 352626.3  | 43800.2   | 39589.07  | 63550.61  | 28472.27  | 52919.17  | 39158.27  | 38757.88  |
| 59807.38  | 12385.4   | 445169.8  | 37174.72  | 41773.51  | 55430.87  | 30263.22  | 55026.37  | 40072.81  | 48684.03  |

|           |           |           |           |           |           |           |           |           |           |
|-----------|-----------|-----------|-----------|-----------|-----------|-----------|-----------|-----------|-----------|
| LN631.040 | LN631.040 | LN631.040 | LN631.040 | LN631.040 | LN631.040 | LN631.334 | LN631.499 | LN631.507 | LN632.332 |
| 34774.65  | 34411.04  | 36988.54  | 42657.89  | 31497.53  | 35290.34  | 17360.14  | 13574.2   | 462710.9  | 43668.47  |
| 31766.07  | 31131.33  | 36371.36  | 47517.94  | 33380.84  | 29806.62  | 19971.89  | 15562.39  | 469701.5  | 46237.79  |
| 33462.63  | 35038.2   | 38856.93  | 45349     | 33401.04  | 32914.8   | 30962.49  | 16301.06  | 335955.6  | 39033.22  |
| 35316.63  | 32040.93  | 35947.22  | 50162.68  | 36948.56  | 36725.56  | 37683.77  | 14704.29  | 367488.8  | 40408.58  |
| 32969.81  | 35086.99  | 34020.87  | 49139.1   | 31757.37  | 31555.11  | 40204.05  | 14385.93  | 370106.7  | 40902.99  |



|           |           |           |           |           |           |           |           |           |           |
|-----------|-----------|-----------|-----------|-----------|-----------|-----------|-----------|-----------|-----------|
| LN632.510 | LN632.717 | LN633.157 | LN633.504 | LN633.619 | LN634.507 | LN634.623 | LN634.716 | LN634.994 | LN634.994 |
| 112587.1  | 141339.2  | 45630.62  | 128945.6  | 67149.62  | 51235.17  | 24938.73  | 57319.31  | 22572.34  | 19417.72  |
| 101201    | 116571.2  | 44259.64  | 155843.6  | 63090.93  | 54793.31  | 28416     | 49373.11  | 21054.75  | 18140.08  |
| 104691.3  | 126317.6  | 43376.31  | 122418.8  | 63909.62  | 42662.28  | 21881.53  | 52573.73  | 22865.32  | 20593.05  |
| 108429.9  | 150966.6  | 36605.82  | 177331.2  | 44600.72  | 47245.3   | 21245.78  | 59614.27  | 22093.16  | 18221.03  |
| 206087.9  | 206538.2  | 31808.19  | 105058.6  | 62595.87  | 58310.59  | 23534.37  | 78152.9   | 18903.77  | 17136.52  |

|           |           |           |           |           |           |           |           |           |           |
|-----------|-----------|-----------|-----------|-----------|-----------|-----------|-----------|-----------|-----------|
| LN635.131 | LN635.131 | LN635.291 | LN635.716 | LN636.277 | LN636.714 | LN637.129 | LN637.129 | LN637.129 | LN637.128 |
| 18034     | 19071.93  | 23193.53  | 25813.14  | 29673.07  | 33594.55  | 33109.22  | 32311.04  | 40878.98  | 65029.01  |
| 22390.54  | 18269.41  | 19523.43  | 24831.92  | 31378.85  | 31411.03  | 34590.88  | 36123.52  | 44027.51  | 67238.01  |
| 21502.39  | 19173.7   | 22027.66  | 21487.86  | 30075.17  | 35434.66  | 35128.44  | 38246     | 42529.9   | 66916.57  |
| 20638.67  | 17206.17  | 19231.78  | 26902.73  | 27361.58  | 33690.62  | 37971.53  | 36572.04  | 45721.75  | 60940.32  |
| 18949.62  | 18502.23  | 20174.88  | 32442.6   | 23704.56  | 43682.09  | 30953.95  | 38226.16  | 40600.58  | 62610.32  |

|           |           |           |           |           |           |           |           |           |           |
|-----------|-----------|-----------|-----------|-----------|-----------|-----------|-----------|-----------|-----------|
| LN637.129 | LN637.128 | LN637.130 | LN637.541 | LN637.589 | LN638.592 | LN638.709 | LN639.027 | LN639.026 | LN639.026 |
| 50082.11  | 60568.86  | 48626.18  | 11625.22  | 588687.1  | 222004.3  | 17358.93  | 26611.28  | 27756.84  | 36235.81  |
| 49051.1   | 63192.95  | 54265.39  | 12981.3   | 581636.7  | 233811.3  | 15145.73  | 27914.65  | 26496.35  | 41884.31  |
| 49541.48  | 59879.84  | 47815.63  | 12789.71  | 397326.5  | 226723.8  | 18098.63  | 25360.99  | 23833.74  | 37504.68  |
| 45478.12  | 66611.26  | 49811.05  | 13395.45  | 434837.8  | 131146.9  | 18107.21  | 28506.43  | 22088.21  | 41819.57  |
| 50786.02  | 63236.87  | 55093.13  | 9252.926  | 461999.5  | 130395.2  | 24514.21  | 25979.23  | 21516.2   | 38120.83  |

|           |           |           |           |           |           |           |           |           |           |
|-----------|-----------|-----------|-----------|-----------|-----------|-----------|-----------|-----------|-----------|
| LN639.028 | LN639.027 | LN639.595 | LN641.536 | LN642.539 | LN643.059 | LN643.543 | LN644.711 | LN645.056 | LN645.056 |
| 26468.17  | 34003.9   | 56736.78  | 429851.1  | 158511.4  | 27579.27  | 33405.17  | 15853.1   | 40989.71  | 37165.14  |
| 25693.17  | 36114.58  | 54634.14  | 470216.9  | 166226.1  | 32385.3   | 40202.93  | 11145.24  | 39273.45  | 35497.44  |
| 28281.8   | 32275.11  | 30497.46  | 493300.6  | 158346.9  | 32666.76  | 23427.88  | 14539.55  | 36251.01  | 43501.2   |
| 27070.33  | 33421.47  | 49472.86  | 543212.6  | 109802.4  | 35520.99  | 26366.78  | 17408.3   | 35767.99  | 36245.86  |
| 23229.32  | 34234.15  | 58730.76  | 267233.7  | 163164.1  | 35592.1   | 36753.67  | 22561.81  | 40025.22  | 35969.9   |

|           |           |           |           |           |           |           |           |           |           |
|-----------|-----------|-----------|-----------|-----------|-----------|-----------|-----------|-----------|-----------|
| LN645.056 | LN645.056 | LN645.056 | LN645.057 | LN645.056 | LN645.709 | LN646.712 | LN646.994 | LN647.129 | LN647.711 |
| 33092.57  | 36569.72  | 33852.23  | 34521.63  | 31708.91  | 32769.96  | 14017.22  | 15028.61  | 15797.82  | 23502.1   |
| 31713.29  | 34371.72  | 36987.69  | 39062.47  | 33864.25  | 26054.42  | 11054.85  | 13668.43  | 17103.2   | 16897.13  |
| 36969.24  | 36632.82  | 32735.62  | 36873.47  | 38151.94  | 28471.69  | 12720.27  | 13747.77  | 16252.39  | 19143.52  |
| 35672.95  | 36871.42  | 38174.43  | 40634.09  | 37448.34  | 35207.05  | 12535.31  | 14511.36  | 21924.79  | 22650.39  |
| 37464.95  | 36054.7   | 36338.03  | 35806.95  | 36214.52  | 44219.83  | 16966.02  | 15488.34  | 22723.71  | 26918.03  |

|           |           |           |           |           |           |           |           |           |           |
|-----------|-----------|-----------|-----------|-----------|-----------|-----------|-----------|-----------|-----------|
| LN648.325 | LN649.010 | LN649.010 | LN649.010 | LN649.010 | LN649.010 | LN649.011 | LN649.514 | LN650.517 | LN651.028 |
| 7053.434  | 38929.97  | 36065.45  | 35572.61  | 25198.1   | 44264.35  | 37912.01  | 627196.3  | 226186.1  | 31862.49  |
| 8041.614  | 34066.77  | 39724.31  | 39053.25  | 26315.08  | 47360.64  | 37079.4   | 597494.4  | 214454.7  | 22375.4   |
| 12667.63  | 37525.64  | 40563.87  | 35128.54  | 32619.18  | 45646.57  | 29589.11  | 605561.9  | 217519.9  | 26121.85  |
| 15749.38  | 36872.8   | 34795.27  | 40044.33  | 29959.9   | 45429.84  | 31419.97  | 604650.4  | 136370.1  | 29076.33  |
| 17323.93  | 44332.55  | 38554.86  | 33162.72  | 32107.88  | 40920.47  | 35584.27  | 597866.8  | 229033.6  | 27809.09  |

|           |           |           |           |           |           |           |           |           |           |
|-----------|-----------|-----------|-----------|-----------|-----------|-----------|-----------|-----------|-----------|
| LN651.029 | LN651.029 | LN651.029 | LN651.028 | LN651.488 | LN651.520 | LN652.404 | LN654.579 | LN654.679 | LN655.159 |
| 25696.24  | 36756.33  | 47780.78  | 47216.42  | 24171.84  | 38446.6   | 24435.82  | 163893.7  | 44316.3   | 91535.64  |
| 31249.01  | 36116.21  | 41369.41  | 50000.39  | 24227.5   | 24043.78  | 27788.73  | 167999.3  | 33572.7   | 123986.3  |
| 25299.07  | 32770.02  | 42913.88  | 44130.88  | 24130.64  | 41150.46  | 25094.81  | 184632    | 41864.31  | 177995.2  |
| 27796     | 38568.13  | 46175.28  | 46260.12  | 21245.34  | 30893.97  | 20014.79  | 182595.3  | 47909.25  | 194992.2  |
| 24676.45  | 29652.63  | 46061.47  | 46768.54  | 19621.47  | 30198.18  | 22892.63  | 120096.8  | 52895.98  | 199550    |

|           |           |           |           |           |           |           |           |           |           |
|-----------|-----------|-----------|-----------|-----------|-----------|-----------|-----------|-----------|-----------|
| LN655.582 | LN655.678 | LN656.678 | LN656.714 | LN657.075 | LN657.075 | LN657.075 | LN657.227 | LN657.505 | LN658.239 |
| 60070.08  | 8468.225  | 40419.91  | 31770.48  | 25574.14  | 37798.69  | 31037.26  | 22221.68  | 47333.28  | 44099.31  |
| 68167.48  | 6242.978  | 38065.67  | 27866.64  | 29310.49  | 39093.76  | 29799.24  | 24514.75  | 46992.13  | 45112.35  |
| 66323.57  | 11477.06  | 25765.14  | 38948.17  | 26906.08  | 41531.39  | 31152.04  | 23662.12  | 49434.17  | 44338.44  |
| 45673.15  | 10239.93  | 34063.69  | 50534.83  | 28574.25  | 41537.5   | 31429.26  | 19143.48  | 41009.87  | 38314.7   |
| 38586.87  | 13605.35  | 58342.19  | 51630.08  | 27258.7   | 39677.5   | 33249.95  | 19491.78  | 40852.46  | 34556.46  |



|           |           |           |           |           |           |           |           |           |           |
|-----------|-----------|-----------|-----------|-----------|-----------|-----------|-----------|-----------|-----------|
| LN658.421 | LN658.526 | LN658.676 | LN659.074 |
| 28370.12  | 158882.5  | 15484.21  | 25323.62  | 39181.73  | 46578.76  | 40557.8   | 38657.97  | 40094.58  | 34818.53  |
| 25842.2   | 184948.2  | 14504.2   | 29353.13  | 34806.02  | 43601.15  | 41464.42  | 39778.24  | 42832.26  | 39480.45  |
| 26551.5   | 192846.1  | 15029.48  | 26982.14  | 32319.36  | 47647.45  | 38245.12  | 42149.72  | 42047.09  | 35458.98  |
| 22006.42  | 124663.2  | 18304.3   | 26863.52  | 34994.76  | 44649.06  | 41557.36  | 44115.64  | 42621.93  | 36702.05  |
| 19313.6   | 191984.4  | 21993.96  | 29966.63  | 33778.05  | 49882.62  | 43039.15  | 40482.2   | 44443.94  | 35699.28  |

|           |           |           |           |           |           |           |           |           |           |
|-----------|-----------|-----------|-----------|-----------|-----------|-----------|-----------|-----------|-----------|
| LN659.530 | LN659.538 | LN659.957 | LN660.542 | LN660.709 | LN661.068 | LN661.069 | LN661.069 | LN661.069 | LN661.069 |
| 67070.76  | 498980.6  | 17007.92  | 226819    | 15763.52  | 41178.7   | 84025.12  | 56430.28  | 33902.28  | 39725.03  |
| 73734.37  | 559368.9  | 21539.33  | 210505.3  | 21593.37  | 42220.47  | 84677.79  | 52426.6   | 35013.15  | 38095.52  |
| 46326.75  | 384188.5  | 20399.98  | 233900.1  | 17444.69  | 41543.58  | 83592.81  | 58584.72  | 34305.23  | 40189.94  |
| 41896.7   | 412331.1  | 15633.57  | 182435    | 18879.56  | 43086.87  | 81004.2   | 56355.62  | 35123.01  | 34613.23  |
| 75797.16  | 448170.5  | 13487.16  | 216832.6  | 20658.41  | 38858.89  | 77100.28  | 54739.56  | 35629.12  | 37533.36  |

|           |           |           |           |           |           |           |           |           |           |
|-----------|-----------|-----------|-----------|-----------|-----------|-----------|-----------|-----------|-----------|
| LN661.068 | LN661.069 | LN661.536 | LN662.539 | LN663.413 | LN663.631 | LN664.309 | LN665.004 | LN665.004 | LN665.004 |
| 30704.11  | 46297.55  | 135020.1  | 68919.52  | 17682.75  | 20546.4   | 46351.26  | 28506.05  | 31034.36  | 40853.44  |
| 31125.46  | 45950.81  | 183796.3  | 61819.69  | 21261.7   | 23531.96  | 48469.47  | 33657.67  | 28086.07  | 39353.79  |
| 28924.44  | 42961.47  | 214400.9  | 63669.14  | 19463.29  | 23402.95  | 47022.01  | 37454.23  | 33726.69  | 42865.94  |
| 28212.49  | 41549.05  | 154040.5  | 68718.78  | 15482.95  | 25069.98  | 31397.99  | 35872.09  | 33162.45  | 44144.32  |
| 31205.88  | 44236.99  | 136089.4  | 54162.05  | 15303.52  | 17271.12  | 39695.61  | 33861.41  | 33074.92  | 39689.7   |

|           |           |           |           |           |           |           |           |           |           |
|-----------|-----------|-----------|-----------|-----------|-----------|-----------|-----------|-----------|-----------|
| LN665.003 | LN665.042 | LN665.043 | LN665.044 | LN665.044 | LN665.609 | LN666.997 | LN666.999 | LN666.999 | LN667.000 |
| 36527.21  | 37255.87  | 37865.34  | 37743.51  | 27745.67  | 16451.7   | 50296.12  | 41251.65  | 36726.59  | 25867.88  |
| 33460.72  | 42393.6   | 39175.97  | 35837.15  | 32629.47  | 14624.6   | 48087.06  | 37777.55  | 36402.84  | 22760.34  |
| 31375.07  | 40905.85  | 35440.2   | 36155.92  | 35160.05  | 14532.47  | 50735.6   | 39175.03  | 33236.92  | 23928.12  |
| 31996.85  | 40976.67  | 38401.67  | 42167.45  | 31837.8   | 15631.86  | 45814.09  | 44079.42  | 37916.82  | 25604.21  |
| 34568.23  | 41227.56  | 35412.64  | 31501.09  | 33366.88  | 11152.64  | 51281.15  | 33696.3   | 34825.6   | 23815.64  |

|           |           |           |           |           |           |           |           |           |           |
|-----------|-----------|-----------|-----------|-----------|-----------|-----------|-----------|-----------|-----------|
| LN666.999 | LN667.000 | LN666.999 | LN667.460 | LN667.652 | LN667.704 | LN668.268 | LN668.376 | LN668.710 | LN669.017 |
| 38661.62  | 33797.81  | 33523.06  | 14706.83  | 25331.28  | 25236.51  | 19499.98  | 22488.47  | 13460.59  | 34143.77  |
| 35793.06  | 38677.36  | 30905.21  | 14647.89  | 22894.16  | 24205.99  | 23237.08  | 22675.28  | 11589.03  | 33112.43  |
| 37085.37  | 34843.62  | 33836.85  | 17060.03  | 19965.32  | 20480.33  | 21864.99  | 21757.83  | 13615.89  | 33935.42  |
| 39415.87  | 37849.01  | 34941.3   | 13486.63  | 25682.8   | 25534.35  | 16318.7   | 19417.79  | 17911.8   | 38427.78  |
| 35039.96  | 38531.72  | 34478.72  | 11549.14  | 36656.31  | 28662.31  | 16543.16  | 18933.19  | 20148.52  | 32291.75  |

|           |           |           |           |           |           |           |           |           |           |
|-----------|-----------|-----------|-----------|-----------|-----------|-----------|-----------|-----------|-----------|
| LN669.017 | LN669.017 | LN669.017 | LN669.017 | LN669.018 | LN669.018 | LN669.018 | LN669.018 | LN669.018 | LN669.018 |
| 39437.67  | 37254.99  | 36525.18  | 40529.96  | 40630.14  | 32048.64  | 33130.91  | 43902.89  | 29849.8   | 26010.67  |
| 37765.84  | 39420.42  | 39914.7   | 43098.14  | 39483.64  | 33488.3   | 31944.06  | 38079.73  | 35665     | 29420.05  |
| 39348.21  | 37489.16  | 43382.31  | 45735.22  | 46532.24  | 35215.16  | 32978.9   | 44332.55  | 39533.69  | 30377.16  |
| 43377.56  | 34518.68  | 39493.7   | 42892.89  | 41050.58  | 34588.3   | 32276.53  | 43496.28  | 37137.79  | 26655.58  |
| 37938.99  | 38835.59  | 37139.35  | 41199.14  | 39819.21  | 32868.83  | 31805.05  | 43504.31  | 39563.84  | 24297.23  |

|           |           |           |           |           |           |           |           |           |           |
|-----------|-----------|-----------|-----------|-----------|-----------|-----------|-----------|-----------|-----------|
| LN669.430 | LN669.567 | LN669.708 | LN670.571 | LN670.707 | LN671.268 | LN671.574 | LN671.709 | LN672.271 | LN672.707 |
| 26581.99  | 544505.7  | 17542.43  | 234132.4  | 56534.18  | 70553.98  | 48181.6   | 12025.56  | 25844.89  | 38145.54  |
| 29186.04  | 661620.6  | 14185.96  | 174493    | 54907.98  | 79702.03  | 48540.56  | 12469.48  | 27220.85  | 38193.42  |
| 30281.64  | 372130.1  | 14048.65  | 184022.8  | 54120.55  | 77142.16  | 37306.92  | 12345.66  | 24952.58  | 32656.5   |
| 19492.88  | 444168.9  | 23745.46  | 195532.1  | 73833.17  | 76136.13  | 33984.73  | 15202.76  | 23828.17  | 43088.81  |
| 22189.04  | 388434.9  | 22469.01  | 219782.7  | 86076.14  | 72617.64  | 53483.15  | 17189.37  | 24177.36  | 49868.96  |

|           |           |           |           |           |           |           |           |           |           |
|-----------|-----------|-----------|-----------|-----------|-----------|-----------|-----------|-----------|-----------|
| LN673.265 | LN673.526 | LN673.527 | LN673.711 | LN674.705 | LN675.666 | LN675.703 | LN676.670 | LN677.545 | LN678.308 |
| 24982.75  | 17025.11  | 13447.79  | 10310.57  | 20585.65  | 90981.72  | 20057.15  | 32356.53  | 603398.2  | 19707.97  |
| 27310.54  | 17241.23  | 15599.94  | 7864.054  | 15890.23  | 50546.38  | 22704.89  | 33224.81  | 569340.2  | 19387.99  |
| 22453.77  | 15979.47  | 12190.48  | 10432.2   | 18410.28  | 87162.22  | 18405.61  | 31337.1   | 569609.2  | 16272.26  |
| 21943.87  | 19121.62  | 17081.79  | 11830     | 17865.68  | 77185.29  | 17814.74  | 31766.15  | 357695.7  | 16887.63  |
| 21827.14  | 18196.62  | 16150.39  | 13318.96  | 22761.1   | 52262.2   | 18124.29  | 33779.63  | 651904.9  | 17257.42  |



|           |           |           |           |           |           |           |           |           |           |
|-----------|-----------|-----------|-----------|-----------|-----------|-----------|-----------|-----------|-----------|
| LN678.548 | LN679.021 | LN679.021 | LN679.021 | LN679.022 | LN679.020 | LN679.385 | LN679.551 | LN679.705 | LN680.734 |
| 250805    | 28251.16  | 25292.05  | 44844.19  | 30457.97  | 39488.21  | 19897.74  | 59752.67  | 14376.11  | 30680.98  |
| 233114.3  | 35197.54  | 25520.96  | 46505.35  | 28198.78  | 46397.94  | 21930.24  | 55492.48  | 9834.114  | 28926.05  |
| 239314.9  | 31003.27  | 26729.77  | 46230.97  | 26942.62  | 45241.16  | 21051.49  | 44869.39  | 12842.68  | 30374.03  |
| 238399.3  | 33385.24  | 25826.17  | 45494.89  | 36435.52  | 45500.66  | 15076.38  | 31853.21  | 15610.66  | 37245.46  |
| 257021    | 32890.69  | 25872.96  | 43667.86  | 29508.89  | 42936.96  | 16820.14  | 36940.66  | 18192.65  | 39756.68  |

|           |           |           |           |           |           |           |           |           |           |
|-----------|-----------|-----------|-----------|-----------|-----------|-----------|-----------|-----------|-----------|
| LN681.016 | LN681.016 | LN681.016 | LN681.016 | LN681.016 | LN681.016 | LN681.296 | LN682.735 | LN683.034 | LN683.034 |
| 37159.14  | 32491.5   | 35053.11  | 36931.68  | 48196.87  | 29411.78  | 896707.1  | 18014.96  | 30797.08  | 32196.01  |
| 44258.5   | 33814.76  | 31872.39  | 37635.37  | 48211.49  | 34165.41  | 920404.4  | 14074.03  | 38243.78  | 31093.69  |
| 37584     | 32322.47  | 38833.88  | 37664.47  | 43849.51  | 29827.32  | 928329.8  | 16530.92  | 29760.41  | 40672.68  |
| 35267.3   | 34339.94  | 41298.53  | 44293.35  | 49735.55  | 23299     | 920088.6  | 17181.21  | 32390.79  | 32869.5   |
| 38398.57  | 34089.8   | 38929.82  | 34638.12  | 44130.56  | 26848.97  | 855381.8  | 18326.17  | 27429.82  | 30618.55  |

|           |           |           |           |           |           |           |           |           |           |
|-----------|-----------|-----------|-----------|-----------|-----------|-----------|-----------|-----------|-----------|
| LN683.034 | LN683.035 | LN683.035 | LN683.035 | LN683.035 | LN683.035 | LN683.035 | LN684.305 | LN685.172 | LN685.258 |
| 39811.53  | 32255.36  | 40060.01  | 45743.1   | 40121.8   | 24374.82  | 29743.07  | 12138.75  | 14379.19  | 155827.7  |
| 34681.76  | 40271.51  | 40618.6   | 39381.2   | 40993.87  | 29771.16  | 33759.79  | 13512.6   | 17100.14  | 158256.6  |
| 38308.81  | 35229.14  | 39277.03  | 49210.28  | 40978.92  | 30132.55  | 31373.73  | 11613.92  | 12965.9   | 155441.4  |
| 40221.06  | 32480.67  | 35537.14  | 47594.73  | 36407.76  | 29316.24  | 28255.61  | 12898.04  | 13467.3   | 134287.7  |
| 38578.17  | 37498.25  | 36799.76  | 50900.94  | 45758.93  | 26048.27  | 34863.78  | 12329.77  | 9994.081  | 129183.9  |

|           |           |           |           |           |           |           |           |           |           |
|-----------|-----------|-----------|-----------|-----------|-----------|-----------|-----------|-----------|-----------|
| LN686.269 | LN686.558 | LN686.678 | LN686.751 | LN687.005 | LN687.006 | LN687.005 | LN687.005 | LN687.006 | LN687.006 |
| 154928.2  | 233050.9  | 17375.73  | 23180.27  | 39172.38  | 36752.78  | 26140.79  | 39970.27  | 29960.38  | 43413.9   |
| 149481.6  | 248736.1  | 10931.2   | 27250.39  | 38701.15  | 43551.52  | 30534.29  | 33151.11  | 24792.28  | 46405.91  |
| 166425.2  | 186983    | 15293.94  | 29087.31  | 40622.33  | 33966.18  | 31335.68  | 44454.74  | 24388.9   | 47764.16  |
| 155323.7  | 200200.2  | 18371.23  | 29176.49  | 41667.55  | 35500.41  | 29707.66  | 36800.4   | 28969.19  | 45458.74  |
| 139781.7  | 209064.1  | 25488.86  | 35581.53  | 30692.54  | 37640.94  | 32776.85  | 38674.78  | 29879.11  | 42848.63  |

|           |           |           |           |           |           |           |           |           |           |
|-----------|-----------|-----------|-----------|-----------|-----------|-----------|-----------|-----------|-----------|
| LN687.005 | LN687.561 | LN688.677 | LN688.753 | LN689.682 | LN691.189 | LN692.340 | LN693.343 | LN694.711 | LN695.032 |
| 27839.53  | 90317.25  | 15165.44  | 14260.58  | 12913.92  | 18477.45  | 59092.96  | 13903.91  | 21739.03  | 33209.52  |
| 22557.84  | 96360.91  | 10381.37  | 12214.85  | 9879.456  | 19554.13  | 62288.34  | 15567.91  | 20611.75  | 32473.36  |
| 28268.94  | 73597.99  | 11732.01  | 17086.06  | 10146.13  | 14570.37  | 58433.49  | 15792.8   | 25419.68  | 37679.53  |
| 27917.87  | 70237.03  | 17506.8   | 14564.62  | 12541.14  | 19625.85  | 30348.44  | 12004.04  | 26470.12  | 36767.77  |
| 27716.96  | 75324.39  | 18605.27  | 14947.92  | 12326.36  | 12642.36  | 50439.99  | 11820.63  | 36318.73  | 36900.29  |

|           |           |           |           |           |           |           |           |           |           |
|-----------|-----------|-----------|-----------|-----------|-----------|-----------|-----------|-----------|-----------|
| LN695.033 | LN695.034 | LN695.034 | LN695.034 | LN695.504 | LN696.298 | LN696.506 | LN696.706 | LN697.301 | LN697.599 |
| 37023.25  | 40261.3   | 43643.17  | 38486.85  | 38789.09  | 87569.61  | 12315.79  | 110692.7  | 25609.22  | 17138.23  |
| 30257.85  | 37574.15  | 42062.12  | 38273.15  | 27671     | 97343.64  | 11868.11  | 98300.63  | 24898.26  | 15187.41  |
| 29628.65  | 34962.81  | 36798.79  | 35485.36  | 34813.87  | 95665.66  | 10172.45  | 109942.3  | 23973.07  | 12987.3   |
| 27076.31  | 33136.53  | 38003.78  | 34718.9   | 37697.68  | 85592.27  | 13064.51  | 121801.5  | 17627.11  | 16509.17  |
| 31102.69  | 35488.91  | 39079.1   | 34554.42  | 38622.98  | 78274.13  | 14486.92  | 160017.1  | 17497.35  | 18079.99  |

|           |           |           |           |           |           |           |           |           |           |
|-----------|-----------|-----------|-----------|-----------|-----------|-----------|-----------|-----------|-----------|
| LN698.287 | LN698.706 | LN699.290 | LN699.322 | LN700.649 | LN700.703 | LN701.024 | LN701.024 | LN701.024 | LN701.023 |
| 79921.95  | 80196.32  | 28524.06  | 17492.75  | 58096.74  | 48282.41  | 42731.86  | 47401.87  | 35757.82  | 41837.39  |
| 89930.58  | 81885.21  | 29275.06  | 20509.79  | 54910.41  | 47382.82  | 30782.66  | 45277.57  | 37385.82  | 35157.76  |
| 85717.53  | 91390.9   | 26258.68  | 31940.21  | 58826.11  | 46717.51  | 30888.72  | 25856.76  | 33450.02  | 36551.95  |
| 79436.66  | 97618.46  | 30832.53  | 39840.1   | 63994.22  | 47221.37  | 30588.6   | 24586.46  | 42097.93  | 38298.44  |
| 77564.68  | 125318.8  | 27100.64  | 43823.73  | 89276.47  | 62059.53  | 30424.01  | 29863.49  | 37137.93  | 37543.84  |

|           |           |           |           |           |           |           |           |           |           |
|-----------|-----------|-----------|-----------|-----------|-----------|-----------|-----------|-----------|-----------|
| LN701.023 | LN701.023 | LN701.024 | LN701.024 | LN701.023 | LN701.023 | LN701.024 | LN701.024 | LN701.024 | LN701.556 |
| 57457.4   | 37982.62  | 30232.64  | 26449.36  | 27264.48  | 34813.61  | 39741.85  | 22325.36  | 28581.19  | 49762.94  |
| 44706.72  | 35828.15  | 37662.05  | 27244.84  | 36284.7   | 43123.02  | 36990.86  | 24453.45  | 25282.07  | 55246.33  |
| 50352.5   | 33667.94  | 34509.85  | 28777.19  | 29182.83  | 35579.82  | 31950.65  | 24760.52  | 22619.93  | 49150.11  |
| 49818.73  | 35042.84  | 39195.6   | 23413.8   | 31995.73  | 37988.29  | 37119.86  | 25573.57  | 26714.71  | 52865.28  |
| 54921.44  | 31326.64  | 35144.74  | 24279.46  | 30103.84  | 39861.34  | 36543.01  | 20736.13  | 29122.41  | 52067.67  |



|           |           |           |           |           |           |           |           |           |           |
|-----------|-----------|-----------|-----------|-----------|-----------|-----------|-----------|-----------|-----------|
| LN702.650 | LN702.702 | LN705.576 | LN705.676 | LN706.339 | LN706.580 | LN707.583 | LN707.656 | LN709.524 | LN713.288 |
| 21791.78  | 19592.65  | 165846.2  | 22948.11  | 47150.99  | 77243.99  | 10755.91  | 17028.11  | 21494.03  | 468064    |
| 20497.47  | 18223.73  | 166952.2  | 23786.54  | 45430.84  | 46510.98  | 7917.132  | 16610.69  | 23686.09  | 479031.7  |
| 21538.5   | 17954.94  | 179133.9  | 19388.76  | 33501.09  | 74364.13  | 10201.17  | 16502.28  | 17264.1   | 456036.8  |
| 25992.43  | 21512.98  | 123018    | 21098.65  | 40023.61  | 50561.48  | 11445.66  | 14731.88  | 19470.21  | 417712.3  |
| 30672.85  | 26051.13  | 187190.1  | 19511.22  | 36380.57  | 55904.74  | 11837.81  | 14338.6   | 21387.86  | 382344.2  |

|           |           |           |           |           |           |           |           |           |           |
|-----------|-----------|-----------|-----------|-----------|-----------|-----------|-----------|-----------|-----------|
| LN713.649 | LN714.301 | LN714.655 | LN715.040 | LN715.041 | LN715.041 | LN715.041 | LN715.040 | LN715.040 | LN715.040 |
| 40029.6   | 338567.9  | 85085.27  | 26899.18  | 38666.34  | 29142.08  | 33913.86  | 41469.37  | 38586.9   | 35517.79  |
| 47414.33  | 323371.5  | 98561.54  | 27469.69  | 39761.56  | 31877.14  | 32980.64  | 34644.53  | 38347.14  | 39495.54  |
| 48462.33  | 340650.2  | 90989.6   | 30543.42  | 40766.84  | 32586.02  | 33363.99  | 31072.26  | 32771.91  | 41728.26  |
| 41959.98  | 309915.5  | 49670.41  | 25205.92  | 44706.41  | 32194.8   | 39065.51  | 36783.62  | 39418.06  | 36793.69  |
| 42535.02  | 294323.6  | 79505.21  | 30379.76  | 48904.68  | 34255.17  | 35113.98  | 33844.32  | 31235.83  | 36828.73  |

|           |           |           |           |           |           |           |           |           |           |
|-----------|-----------|-----------|-----------|-----------|-----------|-----------|-----------|-----------|-----------|
| LN715.040 | LN715.040 | LN715.041 | LN715.040 | LN715.041 | LN715.040 | LN715.041 | LN715.661 | LN716.665 | LN717.713 |
| 22979.02  | 34647.02  | 34283.75  | 24559.14  | 33345.85  | 37723.38  | 36471.76  | 65988.53  | 15358.06  | 106365.8  |
| 16840.4   | 27666.34  | 35144.92  | 20137.94  | 27092.36  | 37858.64  | 35731.07  | 68961.08  | 20678.06  | 120030.3  |
| 16551.66  | 29746.71  | 38224.79  | 23142     | 27480.34  | 33993.44  | 32539.24  | 69706.6   | 19030.94  | 97202.36  |
| 16855.36  | 25427.23  | 33867.65  | 23782.44  | 36664.26  | 36250.46  | 36858.49  | 46701.28  | 18875.41  | 105052.8  |
| 22090.15  | 32766.87  | 32220.41  | 23318.05  | 28925.65  | 38481.15  | 34943.92  | 58728.52  | 15077.5   | 104483.2  |

|           |           |           |           |           |           |           |           |           |           |
|-----------|-----------|-----------|-----------|-----------|-----------|-----------|-----------|-----------|-----------|
| LN718.717 | LN719.012 | LN719.012 | LN719.013 | LN719.014 | LN719.013 | LN719.013 | LN719.149 | LN719.476 | LN720.372 |
| 45007.59  | 33914.45  | 26426.8   | 31146.8   | 42469.28  | 23396.87  | 26003.28  | 20147.29  | 23560.54  | 48856.18  |
| 46616.53  | 37102.36  | 26209.1   | 34295.41  | 39686.27  | 23775.91  | 25869.18  | 25946.81  | 26961.05  | 44950.14  |
| 46974.77  | 35718.5   | 24206.56  | 28880.67  | 38429.04  | 22747.54  | 26070.02  | 43196.06  | 22053.79  | 36975.68  |
| 33367.39  | 33440.33  | 25366.64  | 33256.4   | 43425.74  | 24202.91  | 23942.24  | 44918.07  | 20910.38  | 34273.39  |
| 43162.27  | 36554.07  | 30981.3   | 29025.6   | 38173.35  | 24482.72  | 31672.48  | 47967.98  | 20169.8   | 30109.1   |

|           |           |           |           |           |           |           |           |           |           |
|-----------|-----------|-----------|-----------|-----------|-----------|-----------|-----------|-----------|-----------|
| LN722.664 | LN723.147 | LN723.331 | LN723.535 | LN724.330 | LN724.538 | LN724.662 | LN724.703 | LN725.493 | LN727.944 |
| 11643.86  | 17310.29  | 19293.32  | 48817.66  | 199998.1  | 19472.95  | 16826.1   | 17970.55  | 34285.04  | 27079.44  |
| 9503.235  | 26195.58  | 22395.4   | 45265.96  | 206076.8  | 22351.73  | 14755.12  | 14555.32  | 32251.8   | 29144.35  |
| 11350.82  | 35659.89  | 11541.67  | 47344.22  | 201237.8  | 22157.57  | 15189.65  | 14100.72  | 26113.79  | 25109.94  |
| 12416.21  | 40320.68  | 15069.12  | 39792.7   | 171333.2  | 25639.55  | 18542.39  | 18294.7   | 28195.88  | 24522.73  |
| 11056.25  | 41091.53  | 12886.81  | 49530.13  | 164925.3  | 28569.6   | 21058.39  | 21193.64  | 25795.4   | 18726.96  |

|           |           |           |           |           |           |           |           |           |           |
|-----------|-----------|-----------|-----------|-----------|-----------|-----------|-----------|-----------|-----------|
| LN729.178 | LN729.678 | LN730.683 | LN731.400 | LN731.689 | LN731.729 | LN733.030 | LN733.029 | LN733.030 | LN733.029 |
| 133642.7  | 18671.42  | 36014.97  | 13437.4   | 28266.52  | 11823.7   | 39127.21  | 27827.79  | 32645.39  | 28511.02  |
| 185241.4  | 19037.43  | 35811.41  | 12595.65  | 24039.51  | 13657.47  | 32350.9   | 28945.53  | 33439.18  | 30961.75  |
| 266947.9  | 16352.25  | 43586.44  | 16526.62  | 33983.65  | 13424.3   | 42161.07  | 26387.65  | 34080.79  | 33169.96  |
| 301589.7  | 15505.5   | 37739.29  | 13219.8   | 26279.73  | 10303.73  | 39917.11  | 29832.13  | 29985.96  | 29738.08  |
| 304591.5  | 18530.96  | 37087.47  | 13209.01  | 27947.55  | 11377.4   | 34304.21  | 25589.99  | 31370.7   | 31590.75  |

|           |           |           |           |           |           |           |           |           |           |
|-----------|-----------|-----------|-----------|-----------|-----------|-----------|-----------|-----------|-----------|
| LN733.031 | LN733.030 | LN733.030 | LN734.371 | LN735.375 | LN735.448 | LN737.418 | LN737.556 | LN738.695 | LN741.320 |
| 32231.38  | 43580.31  | 46723.33  | 71639.96  | 27038.85  | 21528.55  | 15468.8   | 16655.92  | 18297.94  | 914331.7  |
| 32605.88  | 37568.63  | 44479.42  | 70533.97  | 26695.42  | 21538.65  | 20008.47  | 18897.27  | 18537.19  | 887532.4  |
| 35606.85  | 42504.82  | 48946.04  | 69216.38  | 20950.07  | 18774.1   | 18744.92  | 25234.38  | 18426.53  | 878007    |
| 38346.61  | 39220.96  | 51744.85  | 64448.23  | 18104.25  | 16639.9   | 13657.16  | 21534.11  | 23225.26  | 813755.3  |
| 35212.72  | 41700.01  | 50881.37  | 57768.46  | 21125.98  | 15382.62  | 15070.32  | 20217.99  | 23864.43  | 758506.2  |

|           |           |           |           |           |           |           |           |           |           |
|-----------|-----------|-----------|-----------|-----------|-----------|-----------|-----------|-----------|-----------|
| LN742.332 | LN742.699 | LN743.336 | LN743.692 | LN744.330 | LN744.698 | LN745.333 | LN745.704 | LN745.780 | LN745.780 |
| 460482.6  | 8371.315  | 170329.9  | 226774.3  | 186679.5  | 1988744   | 56609.69  | 11136099  | 83225.43  | 32615.4   |
| 481258.2  | 5392.067  | 163024    | 239878.1  | 189646.6  | 2093445   | 59287.89  | 11253451  | 77108.66  | 40591.38  |
| 490543.2  | 9138.589  | 165691.3  | 195489    | 129321.6  | 2381275   | 55962.76  | 11781534  | 80207.78  | 42755.07  |
| 446489.2  | 12760.72  | 103144.2  | 194775.2  | 179534.3  | 1550629   | 34186.91  | 8624469   | 77441.91  | 39647.9   |
| 287000.9  | 14159.76  | 103980.3  | 257222.6  | 169882.5  | 2215843   | 35024.8   | 12309617  | 74483.41  | 33747.84  |



|           |           |           |           |           |           |           |           |           |           |
|-----------|-----------|-----------|-----------|-----------|-----------|-----------|-----------|-----------|-----------|
| LN746.710 | LN747.374 | LN747.715 | LN747.724 | LN748.403 | LN748.651 | LN748.719 | LN748.724 | LN749.284 | LN749.704 |
| 19235435  | 16984.27  | 15150255  | 29427.37  | 38009.43  | 33583.22  | 5425642   | 31845.12  | 39011.86  | 23834.35  |
| 19235435  | 14948.01  | 15150255  | 27911.74  | 41594.39  | 41900.93  | 4926097   | 39795.51  | 38554.77  | 20059.69  |
| 19235435  | 10451.31  | 15150255  | 30091.27  | 29262.06  | 45003.33  | 5641608   | 42498.24  | 41516.53  | 21850.78  |
| 19235435  | 12167.46  | 15150255  | 27095.47  | 45093.31  | 44902.47  | 5759407   | 41072.85  | 46082.04  | 22311.25  |
| 19235435  | 13295.57  | 15150255  | 27494.64  | 29781.47  | 54708.33  | 5818306   | 50566.52  | 36427.17  | 21375.05  |

|           |           |           |           |           |           |           |           |           |           |
|-----------|-----------|-----------|-----------|-----------|-----------|-----------|-----------|-----------|-----------|
| LN749.722 | LN750.288 | LN750.651 | LN750.725 | LN751.020 | LN751.022 | LN751.362 | LN751.728 | LN752.361 | LN752.648 |
| 1204624   | 14307.21  | 18110.64  | 198481.5  | 38592.38  | 27966.28  | 26987.54  | 19656.95  | 361688.1  | 11221.65  |
| 1142841   | 14759.4   | 14523.43  | 195688.5  | 33686.5   | 34212.79  | 24430.41  | 22177.4   | 364238.3  | 12405.14  |
| 1183818   | 15928.46  | 18478.26  | 221034.7  | 37038.51  | 26471.87  | 22543.64  | 20212.82  | 376173.1  | 15369.19  |
| 923773.2  | 13009.36  | 33355.45  | 233720.4  | 45953.7   | 31546.31  | 20020.92  | 17383.04  | 329433    | 14271.25  |
| 1144825   | 12896.14  | 42018.75  | 149241.2  | 35917.14  | 32531.21  | 20718.1   | 16742.89  | 303430    | 23614.49  |

|           |           |           |           |           |           |           |           |           |           |
|-----------|-----------|-----------|-----------|-----------|-----------|-----------|-----------|-----------|-----------|
| LN753.364 | LN754.364 | LN759.760 | LN759.796 | LN760.764 | LN762.402 | LN764.285 | LN764.695 | LN765.697 | LN766.694 |
| 111576.4  | 26723.74  | 89133.77  | 25661.14  | 38919.4   | 88572.01  | 57793.06  | 60638.05  | 10387.86  | 45148.18  |
| 120014.2  | 28614.87  | 89749.46  | 25304.84  | 52674.05  | 89233.06  | 61355.16  | 51025.14  | 9876.2    | 37849.71  |
| 80866.73  | 27049.1   | 96863.36  | 27071.64  | 50328.34  | 91854.14  | 57041.23  | 54602.25  | 13193.09  | 45499.32  |
| 111685.9  | 16697.64  | 105273.4  | 25916.87  | 50013.7   | 53610.04  | 55415.7   | 68708.98  | 16947.93  | 53621.27  |
| 73070.91  | 24884.01  | 101109.7  | 24261.4   | 47507.62  | 82546.84  | 50462.02  | 80469.52  | 16850.08  | 58490.71  |

|           |           |           |           |           |           |           |           |           |           |
|-----------|-----------|-----------|-----------|-----------|-----------|-----------|-----------|-----------|-----------|
| LN768.639 | LN768.692 | LN769.351 | LN770.355 | LN770.364 | LN771.367 | LN772.355 | LN773.654 | LN773.777 | LN773.811 |
| 20976.98  | 20610.75  | 1234772   | 425026.1  | 527800.7  | 193785    | 18027.17  | 37758.42  | 13644.03  | 44182.33  |
| 19924.01  | 20004.41  | 1190048   | 414680.7  | 541157.9  | 200221.3  | 19606.16  | 29542.2   | 16099.99  | 48255.67  |
| 24004.99  | 18250.75  | 1114719   | 406170.9  | 545388.6  | 201411.3  | 16275.63  | 38447.5   | 19515.33  | 47212.54  |
| 34928.98  | 22648.25  | 699166.1  | 374870    | 548805    | 187223.6  | 13428.71  | 42644.08  | 18580.85  | 49207.17  |
| 40146.78  | 27017.22  | 1006832   | 356023.2  | 491213.3  | 118942.1  | 14752.86  | 56167.68  | 15672.39  | 47609.1   |

|           |           |           |           |           |           |           |           |           |           |
|-----------|-----------|-----------|-----------|-----------|-----------|-----------|-----------|-----------|-----------|
| LN774.650 | LN776.435 | LN776.650 | LN777.762 | LN778.648 | LN778.768 | LN779.394 | LN779.773 | LN780.393 | LN780.645 |
| 192541.1  | 29341.26  | 147164.8  | 49844.4   | 77437.29  | 81193.09  | 32883.64  | 68179.63  | 501577.8  | 44484.7   |
| 116441.8  | 35108.13  | 113939.4  | 48808.86  | 64836.44  | 88259.65  | 25050.7   | 66220.66  | 539140.6  | 35527.26  |
| 157166.7  | 25410.51  | 134247    | 55159.4   | 69365.55  | 95915.01  | 19461.17  | 71225.32  | 528239.1  | 40553.09  |
| 132337.8  | 25739.41  | 144951.4  | 40102.28  | 79576.75  | 54902.05  | 25243.97  | 66826.6   | 498879.4  | 44629.75  |
| 137725.2  | 26634.96  | 215778.7  | 47938.78  | 118295.2  | 89950.7   | 20968.79  | 43997.14  | 458541.5  | 59366.63  |

|           |           |           |           |           |           |           |           |           |           |
|-----------|-----------|-----------|-----------|-----------|-----------|-----------|-----------|-----------|-----------|
| LN780.777 | LN781.396 | LN782.396 | LN782.644 | LN787.463 | LN787.827 | LN787.827 | LN787.826 | LN787.827 | LN787.828 |
| 21108.58  | 182001.8  | 44905.1   | 8795.597  | 15835.8   | 32654.74  | 30974.48  | 39163.23  | 141809.1  | 18575.3   |
| 19854.83  | 190423.9  | 36794.28  | 12611.99  | 18535.69  | 33399.94  | 32200.59  | 45927.33  | 127251.2  | 21244.44  |
| 23057.19  | 201493.9  | 48997.04  | 13008.91  | 14900.84  | 38597.54  | 32818.6   | 43503.86  | 139173.8  | 20352.93  |
| 15399.99  | 186630.1  | 29658.21  | 11135.76  | 12771.55  | 35434.14  | 28851.54  | 42047.11  | 94641.88  | 15875.57  |
| 14193.28  | 166310.5  | 37503.44  | 12033.25  | 11617.94  | 40920.42  | 29686.66  | 38510.65  | 172766.3  | 18798.64  |

|           |           |           |           |           |           |           |           |           |           |
|-----------|-----------|-----------|-----------|-----------|-----------|-----------|-----------|-----------|-----------|
| LN789.771 | LN790.434 | LN790.776 | LN791.437 | LN791.751 | LN792.317 | LN792.689 | LN793.169 | LN793.480 | LN797.166 |
| 38814.03  | 92727.12  | 20673.91  | 32416.65  | 28337.66  | 124261.7  | 8635.098  | 18526.88  | 16777.89  | 28562.92  |
| 42947.22  | 89869.28  | 20977.12  | 31886.09  | 28102.33  | 124600.3  | 10878.87  | 23699.85  | 21097.25  | 43880.33  |
| 42896.79  | 90895.13  | 20632.11  | 35047.47  | 24827.77  | 118612.3  | 13998.92  | 37892.27  | 16389.68  | 58619.98  |
| 39163.72  | 92894.95  | 16023.8   | 22110.42  | 25077.96  | 115163.6  | 13348.91  | 43855.04  | 16173.19  | 67094.7   |
| 33220.87  | 85116.07  | 19191.79  | 18670.73  | 24456.37  | 106861.6  | 16647.05  | 46448.84  | 14230.97  | 66326.17  |

|           |           |           |           |           |           |           |           |           |           |
|-----------|-----------|-----------|-----------|-----------|-----------|-----------|-----------|-----------|-----------|
| LN797.383 | LN797.516 | LN798.386 | LN798.395 | LN799.387 | LN799.398 | LN800.386 | LN800.393 | LN800.609 | LN801.807 |
| 1179716   | 23164.25  | 420814.5  | 495454.4  | 116522.9  | 202403.5  | 19807.62  | 205496.2  | 17852.55  | 110509.1  |
| 1215106   | 19725.26  | 420129.7  | 522530.7  | 125515.1  | 214302.6  | 19475.89  | 201681.3  | 13842.46  | 92339.45  |
| 1123563   | 22241.1   | 434848.6  | 498053.7  | 116958.9  | 216350.2  | 26280.32  | 202952.7  | 15027.19  | 116429    |
| 1100561   | 21036.86  | 416457.4  | 474738.7  | 110011.3  | 197244.1  | 17687.88  | 182421.6  | 19430.51  | 102050.7  |
| 1002458   | 20798.56  | 391535.5  | 467579.1  | 101481.5  | 196677.3  | 15261.96  | 181537.2  | 22180.89  | 94405.73  |



|           |           |           |           |           |           |           |           |           |           |
|-----------|-----------|-----------|-----------|-----------|-----------|-----------|-----------|-----------|-----------|
| LN801.842 | LN801.842 | LN802.656 | LN802.810 | LN803.197 | LN803.663 | LN803.786 | LN804.466 | LN804.578 | LN804.668 |
| 58518.93  | 30033.11  | 56411.74  | 52742.3   | 129986    | 302362    | 18949.52  | 21283.9   | 37796.99  | 599018.6  |
| 64786.65  | 33482.76  | 50511.03  | 59159.4   | 172282.6  | 207669.1  | 14351.34  | 17262.91  | 31033.34  | 610935.5  |
| 59945.41  | 32513.33  | 36502.04  | 53713.54  | 248768.1  | 209124.4  | 19512.69  | 15220.18  | 30167.85  | 454585.9  |
| 66360.81  | 34902.23  | 47942.94  | 56176.4   | 276086.2  | 229358.7  | 16177.07  | 17175.76  | 34622.76  | 734474.9  |
| 63713     | 30486.39  | 30849.85  | 58524.9   | 281771.7  | 242204.4  | 9924.873  | 13397.9   | 33847.32  | 470884.5  |

| LN805.675 | LN806.670 | LN807.424 | LN807.670 | LN808.424 | LN808.704 | LN809.707 | LN810.276 | LN810.428 | LN810.712 |
|-----------|-----------|-----------|-----------|-----------|-----------|-----------|-----------|-----------|-----------|
| 464988.5  | 230481.2  | 26989.53  | 157988.7  | 655315.4  | 80574.1   | 187147.1  | 24076.9   | 65894.73  | 106917.2  |
| 440358.6  | 163303.3  | 22825     | 145466.6  | 692432.9  | 61125.71  | 194371.7  | 23129.17  | 72755.13  | 149357.8  |
| 492658.9  | 209400    | 19067.72  | 123453.6  | 679896.5  | 76545.33  | 204824.6  | 19725.14  | 42679.36  | 166855.1  |
| 391140    | 194568.3  | 18760.03  | 116368.8  | 622984.2  | 61133.51  | 164862.4  | 24379.62  | 65902.63  | 121230.5  |
| 331291.5  | 196696.4  | 20348.77  | 121188.4  | 618438.7  | 49676.37  | 207449.3  | 25047.25  | 39972.28  | 127236    |

|           |           |           |           |           |           |           |           |           |           |
|-----------|-----------|-----------|-----------|-----------|-----------|-----------|-----------|-----------|-----------|
| LN811.679 | LN811.715 | LN812.685 | LN813.691 | LN814.697 | LN814.698 | LN815.703 | LN815.823 | LN815.859 | LN816.638 |
| 39141.28  | 29316.81  | 368868.9  | 1982382   | 3931435   | 16139.19  | 2579802   | 10075.18  | 63539.5   | 29503.92  |
| 41153.52  | 43775.89  | 369664.4  | 2150209   | 3733484   | 9376.581  | 2831483   | 11303.81  | 58479.6   | 26266.16  |
| 36641.93  | 35915.67  | 379973.4  | 2299649   | 4044229   | 11914.36  | 1997757   | 12442.93  | 64020.14  | 28729.44  |
| 38451.46  | 42238.53  | 422889.2  | 1833777   | 3305389   | 12419.91  | 3196295   | 11435.65  | 63098.35  | 35335.72  |
| 34492.16  | 40187.85  | 269112.1  | 1831073   | 2651746   | 12301.58  | 3685146   | 9522.338  | 60161.66  | 39159.95  |

|           |           |           |           |           |           |           |           |           |           |
|-----------|-----------|-----------|-----------|-----------|-----------|-----------|-----------|-----------|-----------|
| LN816.706 | LN817.709 | LN818.465 | LN818.488 | LN818.639 | LN818.713 | LN819.469 | LN820.188 | LN820.349 | LN821.498 |
| 1024549   | 244763.5  | 78176.18  | 177270.1  | 20136.75  | 30957.84  | 30556.37  | 14638.22  | 178991.8  | 22866.53  |
| 1005723   | 239847    | 84553.11  | 187167.2  | 18004.16  | 29013.99  | 30360.23  | 21114.87  | 187337.2  | 23371.77  |
| 1111214   | 267033.2  | 78921.48  | 175011.2  | 20499.56  | 26387.91  | 31152.3   | 27165.36  | 188574.7  | 19340.1   |
| 870827.9  | 211778    | 49728.13  | 179485.6  | 24113.07  | 36678.3   | 31189.29  | 32996.19  | 178115.5  | 23864.04  |
| 1106740   | 195264.9  | 47933.54  | 180895.4  | 34873.64  | 26385.43  | 18293.35  | 33910.09  | 111315.9  | 24059.76  |

|           |           |           |           |           |           |           |           |           |           |
|-----------|-----------|-----------|-----------|-----------|-----------|-----------|-----------|-----------|-----------|
| LN825.414 | LN826.426 | LN826.666 | LN827.419 | LN827.430 | LN828.418 | LN828.424 | LN828.517 | LN829.427 | LN829.670 |
| 1074009   | 412727.8  | 18507.5   | 101082.1  | 167838.4  | 17998.62  | 157707    | 363721.8  | 55985.66  | 30274.51  |
| 1068699   | 440657.5  | 15643.23  | 113918.6  | 167423.2  | 19091.41  | 162625    | 367117.5  | 52298.86  | 38608.99  |
| 1002053   | 435390.6  | 13262.25  | 104306.9  | 161656.9  | 17677.29  | 169527.4  | 338128.2  | 38815.82  | 31850.58  |
| 941523.2  | 307750.7  | 14770.18  | 98457.83  | 152632.5  | 17078.19  | 103759.6  | 350857.6  | 50297.8   | 34180.28  |
| 897584.3  | 304928.8  | 26369.21  | 65242.92  | 145669.7  | 17458.86  | 152278.4  | 340309    | 32145.33  | 35314.5   |

|           |           |           |           |           |           |           |           |           |           |
|-----------|-----------|-----------|-----------|-----------|-----------|-----------|-----------|-----------|-----------|
| LN829.874 | LN830.678 | LN830.878 | LN831.687 | LN831.819 | LN832.694 | LN832.822 | LN833.697 | LN834.801 | LN836.455 |
| 134841.4  | 159727.2  | 73110.88  | 257385.8  | 35011.22  | 204421.8  | 13883.57  | 53722.06  | 12425.02  | 666606.5  |
| 178389.6  | 157170.2  | 62990.71  | 253791.2  | 34391.95  | 198350.4  | 14363.56  | 56260.12  | 9452.936  | 694918.4  |
| 142877.3  | 119593.4  | 68000.42  | 210803.9  | 30609.11  | 137299.1  | 16647.86  | 55026.99  | 9134.273  | 677210.4  |
| 139276.3  | 102945.3  | 82504.61  | 177239.3  | 35327.2   | 152451.7  | 17564.7   | 61018.72  | 13889.09  | 619164.2  |
| 136315.2  | 157918.4  | 67886.64  | 273422.6  | 32172.95  | 188612.9  | 13230.17  | 49239.04  | 7984.53   | 601697.6  |

|           |           |           |           |           |           |           |           |           |           |
|-----------|-----------|-----------|-----------|-----------|-----------|-----------|-----------|-----------|-----------|
| LN837.458 | LN838.308 | LN838.46_ | LN839.310 | LN842.638 | LN842.698 | LN843.704 | LN843.854 | LN843.890 | LN843.890 |
| 266778.6  | 55834.29  | 72669.57  | 23776.26  | 61260.11  | 36512.24  | 21525.69  | 77114.34  | 29317.04  | 76256.21  |
| 279717.4  | 59292.97  | 76523.43  | 23471.13  | 56400.76  | 37437.03  | 22486.49  | 70623.47  | 33265.85  | 74411.72  |
| 275294.3  | 62261.84  | 73287.66  | 20875.28  | 59647.93  | 30210.92  | 22290.1   | 80018.88  | 29046.5   | 67644.58  |
| 262679.6  | 63937.71  | 72855.25  | 21800.55  | 70719.67  | 34444.53  | 22543.72  | 81205.97  | 33382.39  | 79174.17  |
| 152517.5  | 43855.09  | 45135.12  | 17742.47  | 96188.34  | 39656.21  | 22166.35  | 76340.26  | 33369.84  | 74642.24  |

|           |           |           |           |           |           |           |           |           |           |
|-----------|-----------|-----------|-----------|-----------|-----------|-----------|-----------|-----------|-----------|
| LN844.638 | LN844.676 | LN844.858 | LN844.894 | LN845.507 | LN845.683 | LN846.496 | LN846.636 | LN846.756 | LN847.501 |
| 50020.59  | 76063.39  | 41684.15  | 22175.05  | 162342    | 64635.25  | 38355.4   | 30138.89  | 10984.49  | 16559.02  |
| 48846.63  | 75770.24  | 40622.35  | 22549.32  | 165057.8  | 59516.65  | 38566.19  | 28542.59  | 11749.42  | 19704.76  |
| 53970.52  | 65803.84  | 40856.78  | 22917.83  | 148331    | 59506.53  | 40383.2   | 34638.03  | 11817.17  | 17330.19  |
| 59849.87  | 72393.72  | 43731.09  | 25574.51  | 147655.5  | 60062.24  | 40399.4   | 42484.03  | 14193.86  | 14857.98  |
| 84076.16  | 66546.48  | 42251.07  | 20656.97  | 146972.3  | 54376.09  | 55898.01  | 46194.58  | 16102.55  | 14205.63  |



|           |           |           |           |           |           |           |           |           |           |
|-----------|-----------|-----------|-----------|-----------|-----------|-----------|-----------|-----------|-----------|
| LN848.380 | LN849.383 | LN850.383 | LN853.445 | LN854.458 | LN855.450 | LN855.461 | LN856.456 | LN857.459 | LN857.718 |
| 235698    | 90104.67  | 19623.23  | 763487.2  | 276243.7  | 83955.74  | 121439.6  | 120628.9  | 34645.33  | 16677.69  |
| 226456.7  | 89542.58  | 19798.5   | 766966.8  | 287402.4  | 89163.8   | 126934.6  | 122469    | 41842.68  | 19789.75  |
| 235962.1  | 91830.39  | 13706.3   | 763501.6  | 301417.2  | 64035.26  | 86684.99  | 80454.52  | 34296.88  | 19940.66  |
| 223179.2  | 86556.25  | 17860.31  | 522195.5  | 199386.5  | 53347.91  | 82984.04  | 107697.3  | 34265.38  | 25176.92  |
| 137271.7  | 79048.68  | 12533.29  | 460917.7  | 290113.4  | 49105.12  | 118258.1  | 119833.7  | 33172.63  | 27865.27  |

|           |           |           |           |           |           |           |           |           |           |
|-----------|-----------|-----------|-----------|-----------|-----------|-----------|-----------|-----------|-----------|
| LN857.906 | LN858.422 | LN858.724 | LN858.909 | LN859.691 | LN860.697 | LN861.702 | LN862.701 | LN864.487 | LN865.490 |
| 68141.98  | 15369.24  | 44483.13  | 31288.4   | 88128.07  | 185903.6  | 142856.7  | 51014.64  | 599819.4  | 261565.8  |
| 68127.47  | 12296.85  | 39412.16  | 30865.83  | 53816.02  | 172751.7  | 88927.03  | 50467.45  | 612334.9  | 270606.9  |
| 66599.46  | 15466.86  | 47446.01  | 34045.65  | 92524.14  | 177121.4  | 111288.7  | 44285.61  | 345909.5  | 257822.1  |
| 69066.18  | 12482.98  | 50175.25  | 36249.98  | 90053.35  | 194010.6  | 163365.1  | 49944.02  | 565586.9  | 163851.7  |
| 70520.03  | 11790.34  | 48650.21  | 39656.24  | 74434.96  | 143640.1  | 127019.4  | 45245.78  | 533565.5  | 228862.7  |

|           |           |           |           |           |           |           |           |           |           |
|-----------|-----------|-----------|-----------|-----------|-----------|-----------|-----------|-----------|-----------|
| LN866.339 | LN866.491 | LN866.663 | LN867.187 | LN867.341 | LN871.185 | LN871.650 | LN871.921 | LN872.656 | LN872.925 |
| 88311.59  | 69840.2   | 38963.39  | 18109.54  | 42603.3   | 30000.78  | 78395.98  | 75191.41  | 121830.8  | 50317.09  |
| 90790.28  | 73649.2   | 33182.86  | 21211.15  | 43926.53  | 39939.47  | 92024.36  | 89570.86  | 140239.8  | 43208.59  |
| 90865.26  | 73136.12  | 38922.56  | 33497.67  | 44201.39  | 53178.39  | 76533.06  | 87416.92  | 162382.6  | 53881.73  |
| 93239.35  | 49321     | 38372.83  | 40495.42  | 47034.07  | 66883.05  | 70798.66  | 92060.7   | 223944.7  | 59205.24  |
| 94486.77  | 59859.33  | 33737.85  | 43370.63  | 32635.42  | 66523.98  | 64249.72  | 92580.7   | 146035.6  | 58444     |

|           |           |           |           |           |           |           |           |           |           |
|-----------|-----------|-----------|-----------|-----------|-----------|-----------|-----------|-----------|-----------|
| LN873.662 | LN874.528 | LN874.657 | LN875.661 | LN875.845 | LN876.411 | LN876.667 | LN877.216 | LN877.415 | LN877.673 |
| 162316.5  | 30307.92  | 114690.1  | 235289.3  | 32243.96  | 242990.3  | 336939    | 118281.3  | 98650.67  | 268858.4  |
| 129718.9  | 33960.39  | 92053.17  | 238697.6  | 35190.84  | 254374.8  | 335016.4  | 160403.1  | 102587.4  | 271746.2  |
| 125273.3  | 24353.47  | 121957.6  | 254622.6  | 32305.69  | 254029.1  | 372559.2  | 224351.7  | 102413.9  | 309200.9  |
| 136949.7  | 17590.44  | 106087.9  | 209448.1  | 34134.77  | 168969    | 294831.5  | 260461.3  | 66688.27  | 309458    |
| 127702.6  | 25537.08  | 82047.68  | 206275.9  | 34849.51  | 159672.2  | 383665.5  | 264244.1  | 86376.74  | 238109.7  |

|           |           |           |           |           |           |           |           |           |           |
|-----------|-----------|-----------|-----------|-----------|-----------|-----------|-----------|-----------|-----------|
| LN878.416 | LN878.678 | LN880.672 | LN881.477 | LN881.679 | LN882.480 | LN882.489 | LN882.684 | LN883.482 | LN883.492 |
| 23082.64  | 63553.36  | 91589.87  | 508996.6  | 688931.9  | 216888.7  | 159107.1  | 1286283   | 67226.24  | 72850.3   |
| 26470.17  | 68049.72  | 134520.1  | 541182.9  | 474430.3  | 217601.9  | 162477.7  | 1287749   | 47715.06  | 83209.89  |
| 17555.19  | 105731.4  | 102381    | 538658.6  | 532325.2  | 140686    | 171088.2  | 1415224   | 59945.23  | 69375.94  |
| 21303.75  | 84234.19  | 90910.62  | 363794.3  | 580433.5  | 202906.9  | 107109.7  | 1211813   | 52104.71  | 50071.44  |
| 19772.57  | 96117.53  | 105271.3  | 343593.6  | 790961.7  | 203905    | 120676    | 1066885   | 48008.77  | 40407.63  |

|           |           |           |           |           |           |           |           |           |           |
|-----------|-----------|-----------|-----------|-----------|-----------|-----------|-----------|-----------|-----------|
| LN883.690 | LN884.488 | LN884.693 | LN885.490 | LN885.696 | LN885.901 | LN885.937 | LN885.937 | LN886.905 | LN886.941 |
| 1068076   | 64230.06  | 273203.3  | 21029.06  | 64499.99  | 69307.69  | 25682.63  | 46798.52  | 30908.54  | 19382.76  |
| 1052485   | 70977.53  | 364117.1  | 17091.91  | 85579.79  | 45228.61  | 25809.57  | 41488.08  | 29669.86  | 15131.19  |
| 1234846   | 64686.59  | 333895.1  | 16176.66  | 70872.97  | 45954.93  | 26085.39  | 46229.12  | 31985.55  | 17973.01  |
| 842978.6  | 62922.14  | 353220    | 14120.94  | 80345.58  | 50056.54  | 30341.77  | 46146.79  | 31604.75  | 16649.92  |
| 891861.3  | 45487.08  | 306461.1  | 12910.93  | 60976.22  | 45642.2   | 30527.81  | 50031.25  | 31613.63  | 19092.63  |

|           |           |           |           |           |           |           |           |           |           |
|-----------|-----------|-----------|-----------|-----------|-----------|-----------|-----------|-----------|-----------|
| LN886.942 | LN891.635 | LN892.518 | LN892.640 | LN893.644 | LN894.370 | LN894.523 | LN894.645 | LN895.373 | LN895.645 |
| 27210.45  | 61397.86  | 452018.8  | 138104.1  | 123798.6  | 124113    | 61754.83  | 54440.05  | 58002.35  | 23079.36  |
| 24016.83  | 73909.06  | 470142.2  | 137061.4  | 120252    | 128967.2  | 64262.3   | 48926.78  | 58212.58  | 27269.37  |
| 26056.95  | 96453.62  | 442368.1  | 150409.7  | 130476.6  | 145017.8  | 39186.87  | 58625.35  | 55539.49  | 27131.97  |
| 25529.71  | 93108.61  | 407879    | 122878.3  | 92591.21  | 109687.7  | 41231.72  | 51289.83  | 62178.74  | 22371.36  |
| 27119.25  | 58254.62  | 392406.3  | 115535.6  | 106189.5  | 101950    | 36825.23  | 49735.72  | 61716.95  | 24100.4   |

|           |           |           |           |           |           |           |           |           |           |
|-----------|-----------|-----------|-----------|-----------|-----------|-----------|-----------|-----------|-----------|
| LN896.373 | LN896.504 | LN898.663 | LN899.674 | LN900.679 | LN904.443 | LN905.446 | LN906.447 | LN909.508 | LN910.511 |
| 16326.08  | 159559.3  | 54617.72  | 55159.41  | 38737.31  | 234798.4  | 104828.5  | 24249.47  | 290025.3  | 130199.2  |
| 13923.05  | 169080.3  | 49305.63  | 75119.14  | 35935.52  | 233326.6  | 105299.8  | 21186.25  | 289804.5  | 135168    |
| 13536.5   | 159825.4  | 49197.09  | 46986.14  | 60876.89  | 218838.3  | 105508    | 14334.05  | 200775.1  | 73932.05  |
| 16474.44  | 151439    | 32824.49  | 83678.51  | 35455.12  | 154661.5  | 74178.53  | 19481.91  | 175318.5  | 73974.24  |
| 11894.56  | 152732.2  | 43553.44  | 44746.74  | 37636.86  | 140199.9  | 70567.9   | 19739.72  | 264851.5  | 71238.2   |



|           |           |           |           |           |           |           |           |           |           |
|-----------|-----------|-----------|-----------|-----------|-----------|-----------|-----------|-----------|-----------|
| LN910.520 | LN911.513 | LN911.524 | LN913.968 | LN914.972 | LN920.549 | LN921.553 | LN922.401 | LN922.553 | LN924.405 |
| 78345.24  | 35862.8   | 39419.6   | 84633.89  | 40592.05  | 290178.1  | 132810.8  | 112352.2  | 34346.2   | 14629.29  |
| 82120.53  | 31070.85  | 36233     | 63241.38  | 45558.21  | 295395.3  | 136936    | 118874.1  | 39569.28  | 16028.19  |
| 82374.96  | 20845.86  | 32762.58  | 46618.72  | 46632.95  | 308978.3  | 130598.2  | 129900    | 41323.86  | 15173.71  |
| 55895.81  | 28301.26  | 25338.68  | 70771.61  | 46765.13  | 192542.2  | 71693.73  | 86580.64  | 26481.25  | 13120.36  |
| 82350.81  | 24139.43  | 25919.36  | 74356.76  | 53577.52  | 188758.4  | 122507.2  | 93568.52  | 31244.36  | 15403.39  |

|           |           |           |           |           |           |           |           |           |           |
|-----------|-----------|-----------|-----------|-----------|-----------|-----------|-----------|-----------|-----------|
| LN927.673 | LN927.985 | LN927.985 | LN928.676 | LN929.360 | LN929.683 | LN930.363 | LN930.684 | LN932.474 | LN934.478 |
| 31383.45  | 13098     | 32159.1   | 86050.93  | 39675.54  | 43467.04  | 25151.25  | 28203.56  | 180841.9  | 17125.47  |
| 34295.32  | 12592.43  | 31261.37  | 64337.49  | 35851.03  | 68816.83  | 29824.69  | 32568.29  | 198858.2  | 16548.77  |
| 33662.01  | 14315.92  | 29510.26  | 54481.16  | 37263.01  | 65082.16  | 23438.84  | 28859.9   | 139230.6  | 13905.62  |
| 34265.16  | 13108.53  | 28385.85  | 67580.46  | 36248.95  | 77114.63  | 23922.14  | 34212.01  | 125495.4  | 12441.42  |
| 39838.43  | 15519.6   | 31978.27  | 62478.17  | 36736.57  | 50300.1   | 21068.45  | 28053.5   | 117714.1  | 14643.15  |

|           |           |           |           |           |           |           |           |           |           |
|-----------|-----------|-----------|-----------|-----------|-----------|-----------|-----------|-----------|-----------|
| LN937.54_ | LN938.543 | LN938.552 | LN939.638 | LN940.644 | LN941.206 | LN941.648 | LN942.000 | LN942.645 | LN943.649 |
| 129863.3  | 55530.31  | 30447.33  | 34367.04  | 70683.55  | 17517.15  | 81402.51  | 27188.51  | 41729.74  | 151732    |
| 128340.9  | 64924.34  | 27941.65  | 36293.43  | 71464.41  | 23021.37  | 46002.04  | 25876.65  | 37551.65  | 148468    |
| 127062.3  | 58733.3   | 27387.65  | 29244.33  | 79551.7   | 33126.36  | 64490.74  | 23154.57  | 38975.48  | 162184.3  |
| 79818.56  | 33961.6   | 20219.29  | 41724.34  | 86153.84  | 42498.64  | 51199.49  | 24641.97  | 50176.23  | 130836.4  |
| 73712.61  | 42520.75  | 27437.65  | 41166.48  | 72066.28  | 43885.68  | 77874.64  | 27821.53  | 45894.34  | 163992    |

|           |           |           |           |           |           |           |           |           |           |
|-----------|-----------|-----------|-----------|-----------|-----------|-----------|-----------|-----------|-----------|
| LN944.655 | LN945.203 | LN945.660 | LN946.664 | LN948.580 | LN948.660 | LN949.665 | LN950.432 | LN950.672 | LN951.235 |
| 230698.1  | 29580.88  | 180507.2  | 61385.61  | 181338.8  | 29115.96  | 240552    | 96164.07  | 412758.3  | 88795.19  |
| 234631.4  | 43865.23  | 123610    | 41037.39  | 184086.3  | 32796.34  | 241605.8  | 101915.3  | 421528.6  | 117205.6  |
| 200657    | 62123.56  | 161229.3  | 41984.14  | 171796.8  | 27245.04  | 197461.2  | 60153.03  | 287806.1  | 170401.6  |
| 223188.4  | 67822.16  | 175215.8  | 56793.09  | 153429    | 25574.21  | 225199.9  | 67058.18  | 326238.8  | 195820.8  |
| 201737.5  | 70206.65  | 143647.9  | 52063.76  | 150058    | 33457.48  | 197231.4  | 93854.63  | 452104.5  | 203533.3  |

|           |           |           |           |           |           |           |           |           |           |
|-----------|-----------|-----------|-----------|-----------|-----------|-----------|-----------|-----------|-----------|
| LN951.435 | LN951.677 | LN952.682 | LN956.015 | LN959.623 | LN960.506 | LN960.629 | LN961.509 | LN961.633 | LN962.635 |
| 50330.94  | 364600.3  | 72242.87  | 54366.11  | 34803.9   | 124439.1  | 57743.62  | 57631.95  | 67865.77  | 26997.14  |
| 49400.33  | 361576.6  | 93295.74  | 48063.72  | 36109.38  | 120925.7  | 87120.08  | 57599.08  | 62409.85  | 28091.19  |
| 36849.27  | 300601.2  | 102518.3  | 55182.21  | 39883.53  | 125321.8  | 67497.66  | 34850.3   | 77795.95  | 29976.39  |
| 54410.57  | 275192.2  | 100929.5  | 55271.33  | 36764.69  | 80055.43  | 64626.83  | 35466.43  | 62850.98  | 27575.96  |
| 41608.89  | 297033.1  | 81524.12  | 59036.23  | 42418.2   | 85148.33  | 80334.4   | 46093.73  | 66807.16  | 24187.27  |

|           |           |           |           |           |           |           |           |           |           |
|-----------|-----------|-----------|-----------|-----------|-----------|-----------|-----------|-----------|-----------|
| LN965.571 | LN966.574 | LN966.652 | LN967.660 | LN969.995 | LN970.999 | LN976.612 | LN978.464 | LN979.467 | LN988.537 |
| 48871.04  | 22612.87  | 17218.26  | 32412.27  | 36268.23  | 28988.38  | 104410.5  | 63301.58  | 33374.3   | 70100.85  |
| 47847.87  | 21453.25  | 15698.92  | 36726.9   | 36195.56  | 28994.66  | 107196.4  | 69355.25  | 26242.04  | 62594.6   |
| 44643.86  | 19902.33  | 21109.48  | 34813.61  | 42962     | 30485.3   | 90456.29  | 54678.24  | 33736.82  | 67019.24  |
| 36573.06  | 10105.88  | 13563     | 33282.35  | 45606.85  | 37601.23  | 86549.72  | 72060.15  | 34184.79  | 49435.56  |
| 32895.61  | 10577.24  | 14886.79  | 30940.24  | 44001.83  | 31685.32  | 83700.73  | 55305.47  | 30723.1   | 43784.85  |

|           |           |           |           |           |           |           |           |           |           |
|-----------|-----------|-----------|-----------|-----------|-----------|-----------|-----------|-----------|-----------|
| LN989.540 | LN998.026 | LN998.063 | LN999.030 | LN1000.00 | LN1004.64 | LN1005.62 | LN1006.49 | LN1006.62 | LN1007.62 |
| 31032.45  | 25953.03  | 25609.84  | 16857.3   | 24552.4   | 49916.34  | 28789.12  | 26793.39  | 26487.21  | 16980.6   |
| 29778.01  | 31277.02  | 30592.1   | 20667.01  | 23366.84  | 53871.19  | 29853.94  | 29475.19  | 22684.06  | 17580.75  |
| 19932.63  | 25398.44  | 25541.36  | 17823.59  | 26357.87  | 46858.65  | 31813.98  | 30090.92  | 23015.76  | 13224.26  |
| 23821.43  | 28059.19  | 28178.79  | 22404.47  | 25424.99  | 48360.26  | 28872.42  | 31734.7   | 25713.11  | 13494     |
| 20937.73  | 30514.77  | 27905.78  | 26871.39  | 24663.04  | 40605.4   | 27837.23  | 32786.16  | 22072.68  | 11536.89  |

|           |           |           |           |           |           |           |           |           |           |
|-----------|-----------|-----------|-----------|-----------|-----------|-----------|-----------|-----------|-----------|
| LN1008.63 | LN1011.63 | LN1012.04 | LN1012.64 | LN1013.04 | LN1013.64 | LN1015.22 | LN1016.56 | LN1017.65 | LN1018.65 |
| 25598.05  | 35440.25  | 36705.17  | 71570.87  | 22419.64  | 96196.55  | 18184.35  | 26538.26  | 39456.79  | 102560.5  |
| 25656.75  | 35169.42  | 38992.71  | 74810.98  | 30107.07  | 60104.15  | 21556.19  | 27188.1   | 51007.84  | 87331.7   |
| 29105.73  | 54742.31  | 37968.92  | 89323.98  | 29603.36  | 62071.19  | 33217.01  | 22626.55  | 39334.09  | 89512.74  |
| 26166.86  | 45978.16  | 40041.73  | 86403.43  | 27664.1   | 55371.47  | 41436.1   | 19311.14  | 36663.75  | 91266.91  |
| 27673.15  | 47044.15  | 38596.77  | 101452.4  | 25225.86  | 68209.57  | 45579.33  | 15314.33  | 54016.43  | 90557.09  |



|           |           |           |           |           |           |           |           |           |           |
|-----------|-----------|-----------|-----------|-----------|-----------|-----------|-----------|-----------|-----------|
| LN1019.22 | LN1019.66 | LN1020.66 | LN1025.25 | LN1028.03 | LN1028.61 | LN1029.62 | LN1032.67 | LN1040.07 | LN1041.08 |
| 27114.5   | 73817.69  | 21860.32  | 135197.1  | 11570.42  | 29696.8   | 25126.79  | 25755.85  | 23202.92  | 10563.23  |
| 37634.03  | 79772.28  | 22635.03  | 182799.7  | 10983.78  | 28310.48  | 20415.32  | 26139.1   | 22776.83  | 8850.73   |
| 56635.08  | 78335.37  | 22786.6   | 264635.6  | 13818.35  | 27957.42  | 23988.24  | 21768.21  | 20941.43  | 14722.73  |
| 67046.97  | 81130.96  | 24812.9   | 306709.1  | 14580.82  | 27589.69  | 21181.06  | 21577.01  | 23261.01  | 13126.54  |
| 65678.05  | 74718.91  | 20729.37  | 316830    | 10778.17  | 25685.65  | 20075.48  | 17310.11  | 26526.25  | 15280.41  |

|           |           |           |           |           |           |           |           |           |           |
|-----------|-----------|-----------|-----------|-----------|-----------|-----------|-----------|-----------|-----------|
| LN1042.05 | LN1043.05 | LN1054.09 | LN1055.09 | LN1070.08 | LN1080.63 | LN1081.63 | LN1082.12 | LN1084.1_ | LN1086.64 |
| 23642.57  | 20968     | 28021.52  | 18522.54  | 12211.9   | 31037.64  | 21888.79  | 13901.8   | 13349.9   | 20269.94  |
| 19945.16  | 20282.61  | 30775.1   | 18759.25  | 13684.24  | 29628.36  | 25612.84  | 11360.95  | 10533.29  | 23133.72  |
| 18217.24  | 18671.85  | 30530.62  | 16250.9   | 13282.33  | 26303.51  | 25727.36  | 13979.77  | 17769.6   | 27076.9   |
| 20601.97  | 20388.94  | 33267.49  | 22602.1   | 11594.92  | 29039.81  | 25818.53  | 13227.88  | 12907.12  | 23276.31  |
| 26129.26  | 25309.33  | 33520.71  | 22290.27  | 13146.13  | 24656.03  | 22636.19  | 16787.27  | 15559.35  | 19906.49  |

|           |           |           |           |           |           |           |           |           |           |
|-----------|-----------|-----------|-----------|-----------|-----------|-----------|-----------|-----------|-----------|
| LN1087.65 | LN1093.24 | LN1096.13 | LN1097.14 | LN1099.27 | LN1167.26 | LN1173.29 | LN1247.31 | LN1493.42 | LN1515.40 |
| 19617.89  | 50523.9   | 18467.23  | 12687.92  | 45653.07  | 18824.22  | 27967.93  | 19047.22  | 99709.83  | 65889.57  |
| 23092.27  | 71110.83  | 13377.46  | 16805.89  | 60843.83  | 23079.86  | 34925.43  | 22373.18  | 102141.8  | 58154.79  |
| 25917.3   | 100102.8  | 21100.76  | 16116.94  | 85553.94  | 37727.95  | 55414.99  | 36326.63  | 122110.3  | 82432.42  |
| 23313.4   | 117371    | 17316.63  | 14518.69  | 102271.9  | 43602.12  | 66441.86  | 43427.34  | 127922.3  | 79563.5   |
| 34693.19  | 122837.8  | 20850.27  | 17199.66  | 108287.2  | 47203.61  | 70414.56  | 47769.7   | 126139.5  | 84863.28  |

LN1583.39 LN1584.39 LN1586.4053\_6.59

16524.08 34581.07 15202.35

15815.59 33571.39 17388.5

18322.82 43325.49 16142.36

22887.05 38952.72 21492.18

23683.57 41694.29 23085.28
